# Supplementary material for: De Novo Assembly and Characterization of Sophora japonica Transcriptome Using RNA-seq
Source: Biomed Res Int. 2014 Jan 2;2014:750961. doi: 10.1155/2014/750961 (PMC3910276; doi:10.1155/2014/750961)
Supplement: Supplementary file 1 — Additional file1: Information of unigenes expression in S. japonica. Additional file2: DNA sequences of all unigenes in S. japonica. Additional file3: Potential protein coding sequences of all unigenes in S. japonica. Additional file4: Quality score distribution across all bases. Additional file5: Quality score distribution over all sequences. Additional file6: Distribution of unigenes mapped to the speciesshown by pie graph. Additional file7: Detailed information for GO classification of unigenes in S. japonica. Additional file8: COG functional classification list of unigenes in S. japonica. Additional file9: Detailed information for unignenes mapping KEGG pathway in S. japonica. Additional file10: Illustration of the whole network of unigenes in S. japonica. Additional file11: Protein-protein interactions of unigenes in S. japonica. [file 750961.f1.zip › 750961.f1/Additional file/Additional file 3 Sja.orf.fas]

>comp40793_c1_seq1
MLCFLVCNSVYFFSFYCTHTLVLTRPR*
>comp29096_c0_seq1
MEAHVCCIYLSIIILHDFFFKFLIIINFSICFKQNVVVSMAITSTNYLFF*
>comp284410_c0_seq1
MPLNTFADFIKIMILLFLIGARIYHDAADIDYSAKYGI*
>comp158192_c0_seq1
MLISIAMCPLSLFYRSLFLNFVHKESRVLVMQYTNSFIKCLGMYTVLVYRCCTGT*
>comp146401_c0_seq1
MMHTKNKELLLPHRYLEFSMPTRGCNL*
>comp58805_c1_seq2
MLLTTRVVSSGHTSISAIPFRFRPCHPSPKTPSPVTLHFYMDQPSPFCSLKLKQRHLACQASQDAFSPRSDELPVHGLSEVVVGVLGGGQLGRMLCQAASKMAIKVMVLDPQENCPASSLSYHHMVGSFDDSATVEEFAKRCGVLTVEIEHVDVATLEKLEQQGVDCQPKASTIRIIQDKYLQKVHFSQHGIPLPEFMRIDDLEGTKKVGELFGYPLMIKSRRLAYDGRGNAVAKSEEELPSAVDALGGFDRGLYVEKWAPFVKELAVIVVRGRDNSISCYPVVETIHRDNICHIVKAPANVRWNIRECATEVAYKAVNSLEGAGVFAVELFMTRDGQILLNEVAPRPHNSGHHTIESCYTSQFEQHLRAVVGLPLGDPSMKTPASVMYNIIGEEEGEVGFCLAHQLIKRALTIPGATVHWYDKPEMRKQRKMGHITIVGPSLGNVESNLAIMVEGNGLDDKSAVAPLVGIIMGSDSDLPVMKSAAEILENFGVPHEVRIVSAHRTPEMMFSYASSAHDRGLQVIIAGAGGAAHLPGMVAALTPLPVIGVPVRASSLDGIDSLLSIVQMPKGVPVATVAINNATNAGLLAVRMLGVANDDLLSRMSQYQEDQKESVLRKGDKLEKHGWESYLNST*
>comp31595_c0_seq1
MNPPEFPTGGTSPTSSKKEVQLEGPRPPPLRVSKESHKIKKPPLPPQQRQPAIIYSVAPKVINVAVSDFMDVVQRLTGPSSGDPPPTGREDLSPAARLASVEKTSPPSEKEGVHHSGDDDVTCMLEGVEVGPFPGILSPAPATSPPISSELFSPQPVSLLNDLSPFWSASSLVSGAVVSPLPSPPDLFNLFD*
>comp297013_c0_seq1
MSFFTTIKQIWKQLEPKLKICVLKSAWIKVHTFSHGYSLHLRF*
>comp28757_c0_seq1
RAVSKRQLNKIKKCDEIRHNNNVVNLDLPATRTTKPKSNPFPTPSRPKSVAHETSRAQLLQLLKALQTTCSKYSLII*
>comp15958_c1_seq1
VDGERWPHQRKAAASYQFSTKLLRDLSSSVFKPSAVKLSGIVSV*
>comp45554_c0_seq2
MAEGSSSNFVQPAIPKFDGHYDHWAMLMENFLRSKEYWGLVENGILVVADGAEPTEAQRKLIEEQKLKDLKVKNYLFQAIDRDILETILNKDTAKHIWDSMKQKFQGSTRVKRAQLQALRRDFEILHMKEGETVNAYFARTLAIANKMKAHGESMRETIITEKILRSMVSKFDYVVCSIEESNNLDTMTIDELQSSLLVHEQRMRSHGEEEQVLKITHEDRTGRGKGRGAFRGGRGRGRGRQSFNKAVIECFKCHKLGHYKYECPDWETKANYAELEEEEELLLMSYVELKQAKREEVWFLDSGCSNHMSGSKEWFSELDESFRQTVKLGNNTRMTVVGRGSVRLQVNGFTQVISDVYYIPELKNNLLSVGQLQEKGLAILIQHGKCSVYHPRKGLIMQTNMSGNRMFFLLAAMVPKASTCFQIVSENESHLWHCRFGHLSYKALRTLSYKKMVNGLPSLKTPKKLCTDCLTGKQHRDSMPKKSLWRASNKLQLVHADICGPIKPASNSNKRYILSFIDDFTRKTWIYFLHEKSEAFAMFRNFKACVEKESGVSIACLRTDRGGEFTSTEFEEFCKVQGISRQLTAAYTPQQNGVAERKNRTIMNMVRSMLAEKQVPKMFWPEAVKWSVHILNRCLTVAVQNKTPEEAWSGMKPTVEYFRVFGCVAHAHVPDQKRNKLDDKSKKCVLLGVSDESKAYRLYDPVSKKIITSKDVIFEEDECWDWGRSKEEYRLDVLEWGDDEDGNDIEEEAESNEDEIHGTDTRDSSETDSPSTESHENDPPMLDERRVRRAPFWMEDYETGEGLSDEYDLNAMMMLTEDDPLTFEEAVKSKKWRDAMMVEIESIEKNKTWELTVLPDGVKPIGVKWVFKTKLNENGEIDKYKARLVAKGYAQQYGVDYTEVFAPVARLDTIRLILALAAQHSWDVFQLDVKSAFLHGELNEEVFVQQPLGYEKKGEEDKVYKLRKALYGLKQAPRAWYSKIEAYFVREGFKRCFCEHTLFTKSKEGGKLLIVSLYVDDLIYTGNDRSMCNEFKNSMKLEFDMTDLGRMRYFLGIEVVQSSDGIFVCQRRYAREVLARFGMNNSNAVKNPIVPGTKLSRDEAGTKVDATLFKQVVGSLMYLTATRPDLMYGVSLISRFMSCPTESHWFAAKRILRYLRGTTELGIFYKKGGCTDLVAYTDSDFAGDLDGRKSTSGFVFLLGSGAVSWSSKKQPVVTLSTTEAEYIAAAFCACQSVWLRRVLEKLGHKEKKSTLIQCDNSSTIKLSKNPVFHGRSKHIDIRFHFLRDLVRDGVVELSYCNSQEQVADIMTKPLKLEQFLRLRSMLGVVEASKDPREEVL
>comp55215_c1_seq3
MMMLPIKCQNSFFFPISIPNPNLLLGKKLSSRKTSSVYFAFAVPFVQSKLSPSGTRPIEMEKKGNKRVGKKEHHLWQRRDSAQSGQKALSLVRFVSGLPNEKEAVYGALDKWTAWETEFPLIAAAKALRILRKRGQWVRVIQVAKWMLSKGQGTTMGTYDTLLLAFDMDQRVDEAESLWNMVLHAHMRSVSKKLFSRMIALYDHHNMPDKIIEVFADMEELRVKPDEDTVRRLARAFRKLGQEEKQKLLIKRYGLQWKYIHFNGERVRVRTEAWEEDDESTN*
>comp183484_c0_seq1
MNSQGKYPHQILHQICLSYPFHCLKQSIYIQRHESGRCLVFFLCRVHKEFSLKWALLVP
>comp147272_c0_seq1
MKCFHIHVTDGRNLNVFSSNNVKIHSLGRSDFFFFFYTREQLLSLNTHERLRTRMKLRSLELKSHARQIKNSSTLPICLYVFSQI*
>comp424268_c0_seq1
QYKIICQKLNINKKHINFKNLEEKKRENFYWKKIKSPRVHFIIYHLTLTCVIPI*
>comp558355_c0_seq1
MEFEDLKHAKFQKDLGLIKKSILHKT*
>comp200878_c0_seq1
NKLSLTYEHSNPTNTPQKSHNAISFSNVTLLSKPLKLLNKNSPKLKRHIFTKYSSVLCIRCCLDVSQICFEIQF*
>comp33531_c0_seq1
MIIMDLIFKFDAVNQGSFFRDLPVMIRKNLNM*
>comp18154_c0_seq1
MLLWDLGDVGIDCFGSLGNMVFGGWLFHRFIDDSLVFLLLQVPLCSLLKYPPSLRLLQGCQFWFELRCRFFFFF
>comp237777_c0_seq1
MYLDILPMNCWLASIMNIQDTAWSVCDTEGETNYHLSLKCHISRIIWSSSEW
>comp44752_c0_seq1
MVWDFASSSRNCFGYINGLGDLCWVIWLLLHEDL*FNRITLLRF*ILI*TYSLFLLERILCQRWFLETCFPFECFFLLELVYIESNEKFFPNTLSATRKMEMYSCSVVG*
>comp286443_c0_seq1
MNAYSLKILCSKISDAADACHQQYHMEKLKHMNLLTFLAGLTMATMVLSTFSTRI*
>comp55368_c0_seq4
MGKVSPKEKSRKTRKQRRQLRSSGNKYLKPGALAQLRYSKSSSSSSSAAAAAAKSCTDLGKKRVAVLHSRKTQDGLGHEDKVFDKSPLMLSPVNLVKQNSFLGTPKTPRTDDCESESRLESLHMDLLVKILCHLHHDQLRAVFHVSRRIRKAVMIARQFHFNYTTPDRYRQEMLSTMTPRPTEHWPFLCKGDGKGLRIPSPHTPKAPRHGPRPPSRLKVSEMRQVAAVLFQESAFPSRCMVPSVIPKPLCKSLASNRVLFYEDELCQAVAQNKLR*
>comp20605_c0_seq2
MADALTEDQIAEFKEAFCIIDKDSDGFITVDELATIIQSVDGNPTKEEIQEMISEVDIDGNGSIDFEEFLNIMGRKMKENQAEELKEAFKVFDRDQDGYISATELRHVMMNLGERLTDEEAEQMIREADLDGDGQVSYEEFARMMMLN*
>comp417895_c0_seq1
MILGQTMVVNVCHLILNSYCVSKRIINPSFVFGNISLKYIYLHEITFF*
>comp50073_c0_seq1
MVHNTIQSMGFDVDLFVGSSLIKLYAENGCILDARGVFDKLPQRDSILWNVMLNGYVKNGDPNNAIGTFQEMRKSDSKPNSVTFTCILSICATRGILSVGIQLHGLVIGSGFEFESQVANTLLAMYSKCGNLFDARKLFNTMPQTDTVTWNGLIAGYVQNGFTDEAAPLFNAMISAGVKPDSITFASFLPSIVESGSLKHCKEIHSYIVRHRVPFDVYLKSALIDMYFKGGDVEMARKIFQQNTSVDVAVCTAMISGYVLNGMNIDAINIFRWLIQEEMTPNCLTMASVLPACAALAALKLGKELHCDILKKRLDHAYHVGSAITDMYAKCGRLDLAYHFFRRMSERDSVCWNSMIASFSQNGKPEMAIDLFRKMGRAAIKFDSVSLSAALSACANLPALYYGKEIHGFVVRNAFSSDTFVESALIDMYSKCGKLAFARCVFDLMDWKNEVSWNSIIAAYGNHGFPRECLDLFHEMLETGINPDHVTFLVIISACGHAGLVDEGIYYFRCMIEEYGICARMEHYACMVDLYGRAGRLHEAFDTIKSMPFTPDAGVWGTLLGACRVHGNVELAILASKHLLELDPKNSGYYILLSNIHADAGEWASVLKIRSLMKEKGVQKIPGYSWIDVNGGTHMFSAADGSHPQSVEIYLILKSLLLELRKQGYVPQPYLPVHPQIMSKC*
>comp375882_c0_seq1
MKSNSSTFGEMKQSKKNTVMSPASTSCTIATRGEKATINPLTIPQHTHTSKKSDEEVENLLGYELSPIPLSLFNEGGMRKGT
>comp41402_c0_seq1
MLHSAGCQFGLTSNMQPLYCSSILKLGHKTDNGTRSSGHLHRHHEEVQPGQQ*
>comp476430_c0_seq1
MPTQLTQSTRCYKAEKGRETRGHVASSSEFNEKSTNIPSYIGSLMPQARQGK*
>comp406603_c0_seq1
GNLFSLSRLPLKLKSTTASSSTSIFSIIFQIIKHRN*
>comp47067_c0_seq1
MLQLFFTVAFSAVPLTLYVPPIRSLNLFVETMEDIGRESRMYTNRIYPRLRVAWSRIMDCMLCNTRTR*
>comp19395_c0_seq1
MYSALLRLPGERKVAANRVAELMKELGLDHIADSRIGGGSNHGISGGERRRVSIGVDLVHDPAVILIDEPTSGLDSASALNVVSLLRLMAFNQGKTIVLTIHQPGFRILEQFDHLVLLSDGFVMHNGSLNLLEARLKLAG
>comp509671_c0_seq1
MKLICYPGSIILMPFWT*ALLES*GREGCASSATFSFLLSALPASSTILTNWVIILALI*PLFGGSLTVLLG*DSIFSLVFGIASKEWVLRKQSR
>comp153695_c0_seq1
MGKGHRKLQYAASGYPSSRIRKYNWSVKAIRRKTTGTGRMMYLRYVAVRFKTNFREGTRAAPRKKGASTSS*
>comp371998_c0_seq1
MKFKYYKSVEVSLVSSQEGDQRLYSILVACEL*
>comp56485_c0_seq2
MEEKEIFGSGHAVKGDEAPESFHVAPRSENSVQFAGTTAEPAAPVSVAATPVTEGKKKRGRPRKYGPDGKPVLALSPMPISSSIPLTGEFSGWKRGRGRPVESINKLYKHFGVENAGPGDGIAYSVGANFTPHVLTVNAGEDVTMKIMSFSPQGCRAICILSANGTISNVTLRQPTSSGGTLTYEGRFEILSLSGSFMPTENGLTRSRSGGMSVSLAGPDGRVVGGGLAGMLVAAGPVQVVVGSFLPGHRQEQKPKKQRVDHISTIASTHVNPNCDEEIKISFGGVKPIMTPAAFQVDNIASFNNVQGYRNSSADDKAPLPEKESNPSISDAGVAC*
>comp8746_c0_seq1
FLHNYILYPVLGDQILFFPSGIFPHKLRWQIPLG*
>comp57815_c0_seq7
MLGCKLWLRSTLSPSVMRNTLLGQCFHTRNEKIHKDIFGLFQPFLQSLEALQDGEHEKQRRHFLYFLLHQVPVSSNFSILTRKLACQIALLVVHRGYKMNPPCPPFECAHMWGPALVSSLKDSSLHNSLRQPAFDLIQTIIVSDATALIYSVLNSCTTPSTDSSMAYESIELDDDIWLPTTPDGEEKDSGYWSQFSVQSRITSQECREWMCIPMLWVDVLVDINPLVLPISFSNAVFWARSHFPMVELENSAEMVLPVRSCLSSYAAEISSSFGWKVPTGSDDGGDGSKSKNSVEVLTMSFPLIRTFSRLTAHFLVQMGQGELRRQWTWEPQMGESLILSLLDPNDNVRQFGKSMLEQVSDTRGLSCGLKFLCSHKPSLYATFLGLKHAMKLVQLDSVLLKFHTLHHFWFLLCKLLKDGGLPAPELPEYTRSDLRVPKFSSQGGFLKQPAFDSMPVDIDKHVELKTKEKIGYLLSEMAWPIFCRCLVKGKEFIDYNLCQMTCVRLLEILPVLVDRLHLLGGKVLGNFSMVVQNKLDFKWLHDLMEWGKSSLKVVIVYWKRAVTYLLNLLKGSCGKTSMSTIMTIENLISSDGYPLEELTEQLSRLSVSLSREGSCNFQETNMKPKSSISRSLSFEKNYFTSGIHSSSMEDKGVQIVDSKMTNGENDTESVIVLSDDEVDPKVFPKKIILSDSETGHQMSDGNIMSYDDGKSLDGNIMSCDAGKSLSAAGPAKQNVSYMKTSNEMEETIQKKAITNVFSLSSQKRDSGNLQDKPVVTSFIDSKGLGSHSREESSKSKDRVSLTKYSDEAVNAKNLNQACCSTTPKTGDSVPSTGNKMLSDFRDAEDDPLETALKSVGRIQLHVPKPTSVLRRQVIQLKTPLENRSGCLHKLEDIVKRFKPPRLDDWYKPILEINYFATVGLSSTRKDENQTVSKLKEVPVYFQSPEQYVEIFRPLVLEEFKAQLQNSFLEMSSWEEMFVGSLSVMSVERIDDFHLVRFVHDDGDSAACKSFSENDLLLLAKDPPQKSSQDVHMVGKVERREKDNKRSLSILLIRFYFQNGSSRLNQARRNLTERSKWHACRIMSITPQIREFHALSSVKGIPLLPLILNPVNDSLCLNESKEVDLNKLSQSLQRTLRSSFNVSQLQAMSVAIGIAKPKKNVELSLIQGPPGTGKTRTIVAIVSALLASPPQKMNCLKNSSDENLNQNSFSSHSRPKISQSAVIARAWQDAALAKQLSDDVQSSSKSFGNCVRQRVLICAQSNAAVDELVSRISSHGLYGSNGKMYKPYLVRVGNAKTVHPNSLPFFIDTLVDQCVAEERMHSNDGKNDLRVDSSVVLRSKLEKLVDSIRFYEAKRANLRDGNSNVKNHLHDDSHMGDEKEMSDAEIEMKLSKLYEQKRQIYKNLSNVQAQEKKANEKTKALRSKLRKSILREAEVVVTTLSGCGGDLYGVCSETMLSSKFGGPSEHTLFDAIVIDEAAQALEPATLIPLQLLKSSGTKCIMVGDPKQLPATVLSNVASKFLYACSMFERLQKAGHPVIMLTEQYRMHPEICKFPSLHFYDNKLLNGSRMSSKSAPFHQTKGLGPYVFYDIIDGREVHGKNSGAMSLCNEHEADAAVEVLRFLKKRYPTEFVGGRIGIITPYKCQLSLLRSRFINAFGSSSIADMEFNTVDGFQGREVDILLLSTVRAAHSSTAASGINSRTIGFVADVRRMNVALTRAKLSLWILGNARTLQTNHNWDALVKDAKERNLVMTAKMPYHSMFRTASKNNCFFENSDNHARPLKHEKKVKDNSKHITKILVNDKDTFERKKKCMASEVNDRNKGNDEENAFSALGKDAQCKERNSKDEHISIKKDMSCLVAKCESRSHCDGMFTVSDQQVCNSERKGKDKMKISMGKTTLGKRQSKFHNLRNNLDHPVEETGGGHKSQKLSDSERPSMYSGWDKSSSCKEVSASSMEGCHNERDTDDRGRAPNQSRASEISKRKQQREAVDAILYSSLISTKKAETLTKVSAKRPFSSSVANGSMKPPKTRNVRPDP*
>comp56122_c0_seq1
MSSDSDEDELLQMALKEQAARDLSYGKSSSSSNSRKPVANYVQPPSSQPKRPSPPVNTGTAKQVQSKGRVLDDDDDSEVEMLSISSGDEDNAKDPILGSRNRRGGGGGRAAAQDDDHRGWDGEEPSRWKHLDEAELARRVREMRETRTAPVAQKFERKGSALGRKGLNYLQSFPRGMECVDPLGLGIIDNKTLRLITESLDSSPKTDKDHLDGSLREKLMYFSESFDAKLFLSRIHHDTSSADLESGALALKTDFKSRTEQRKQLVKDNFDCFVSCKTTIDDIESKLRRIEDDPEGSGTSHLFNIIQGVSLQANRALKPLFERQAQAEKIRTVQGMLQRFRTLFNLPSTIRGSISKGEYDLAVREYKKAKSIALPSHIQVGILKRVLEEVEKVMHEFKSMLFKSMEDPQIDLTNLENTVRLLLELEPESDPVWHYLNIQNQRIRGLLEKCTLDHEARMEILHNELRERALSDARWRQIQEELSESSDVNNSPILGNSHLAVQSHPVDLTGEEVDALRGRYIRRLTAVIIHHIPAFWKVALSVFSGKFAKSSQVPTESNTNSAANKIEEKAGDGKYSSHSLDEVAAMICSTISLYGVKVTNIFRDLEESNVLRSYMSDAIEDISKACVAFELKEAAPQIAVGALRTLHSEIIRIYVLRLCTWMRASVEEVSKDVTWVIVSILERNKSPYAISYLPLTFRSVVASAMDQINSMLQSLRNEATKSEDTFMQLQEIQESIRLAFLNCFLDFAGNLERIGIELGQQRSDKEGSQLPNGYTDELEENAPSDLQGGVTDPHQQLLIVLSNIGYCKDELSYQLYDKYRHIWLHSRGKDEGDSDVQDLVICFSGLEEKVLEQYTFAKANLIRSAAMNYLLNSGIQWGAAPAIKGVRDAAVELLHTLVAVHAEVFAGAKPLLDKTLGILVEGLIDTFISIFHENETKDLSALDTNGFCQLMLELEYFETIFNPYFTPDARDSLKSLQGLLLEKATESVTDAVDNPGHNRRPTRGSEDALADDKQGTNVSPDELIALAQQYSSEFLQLELERTRINTACFAESIPLDSVPEPAKSAYSSFRSSMDSPSRNYRGTYNTGSSSFARHRH*
>comp24303_c0_seq1
MSDCGEEEDDALVVRALDINEADLGDYDSKELPVNGHQYLHRVMKEAKSMPVIVVADVNRKRFESKQNVYVHPIEVFDVPEKYLPTKYWQNQQERDFGIIRKTVLKMRNR
>comp47281_c0_seq1
MWHQFHYMHVDVKETHISCITFANEGTNFICNNIKQAGTS
>comp54441_c0_seq3
MGSLPCLLLVILPLCYGVAAACSNGDCRLLDECSSDDDCGAGLYCFSCPLGLSGSRCVRSSITDQFKLINNSLPLNKYAFLTTHNAFAIDGEPSHTGVPRVTITNQENSVAQQLNNGVRGLMLDTYDFDGDVWLCHSFKGQCHDYTAFEPAMDTLKEIEAFLSANPTEIVTLILEDYVQAPNGLTKVFTDAGLMKFWFPVTSMPKNGEDWPLVSDMVAKNQRLLVFTSIRSKEQSEGIAYQWNYMVENQYGDGGRKVGSCPNRAESSPLDDKSKSLVLVNYFRSAPLKPITCADNSGVLINMLHTCYGAAGNRWANFVAVDYYKRSEGGGSFQAVDTLNGKLLCGCDDVHTCVPGSTSQACSP*
>comp1159_c1_seq1
MTYTVGDNMGWTVPSGAAAYRTWASGKAFKVGDILGK*
>comp36155_c2_seq1
MGYLCDPQSPLTCTDANKYVFWDAFHPSEKTSQIVSNYLIENYLSKFL*
>comp32353_c0_seq1
MSFEPQNSETESSSNSFSSPPTSPSSPPSSRALQNSASHAKTQDPESKKSKRIRDSNKHPVYRGVRMRNWGKWVSEIREPRKKSRIWLGTFPTPEMAARAHDVAALSIKGNSAILNFPELANSLPRPVSLAPRDVQAAAAKAAHMDKFDLPSSSSSTLSSLVSPMDLSTGSDELSQIIELPRLETCDDTAELEKEFVFMDSLDGWMYQPPWLQSMEDCDGFVADQLAVPDSGVITSFESLLWNY*
>comp48564_c1_seq1
MRQLTVLNLADNSISGEIPASIVELAGLMHLDLSNNRIAGELPSDFGKLAMLSRALLNRNQLAGSIPKSVSKMNRLADLDLSMNRITGSVPVELGKMRVLSTLNLDGNSLSGQIPSGLLSNPGMGILNLSRNGFQGSIPDVFGAKSYFMVLDLSFNNFSGRIPSSLSSAKFVGHLDLSHNHLCGTIPIGSPF
>comp47282_c0_seq2
MGFPANGASVEKPLKFLIYGRTGWIGGLLGKLCEAQGIDFAYGSGRLENRSSLEGDIAEVKPSHVFNAAGVTGRPNVDWCESHKAETIRANVVGTLTLADVCRERSLVLINFATGCIFEYDSLHPLGSAIGFKEEDTPNFIGSFYSKTKAMVEDLLRNYDNVCTLRVRMPISSDLSNPRNFITKITRYEKVVNIPNSMTILDELLPLSIEMAKRNLTGIWNFTNPGVVSHNEILEMYREYVDPNFTWKNFTLEEQAKVIVAPRSNNELDAAKLKKEFPELLSIKDSLIQFVFKPNQKAKA*
>comp56033_c0_seq4
MEIESSSGSAERFKLYQELELQEFQDKFVIKSLESPNQGFWISRLDGNINLIDCDICLENPSRTSTIYGVAGIIRLLVGTYALVITSRKEVGSFLDFPVYRLMSMRLLACNEALRFSTAQEKRDEAYFVNLLKTVESMPGFYYSYETDITLNLQRRSKLVEGWMSKPIWKQADPRFVWNRHLLEELIELKLDRFIVPIVQGSFQAAELKLKDSRATITLVSRRCTRRLGTRMWRRGANLEGDTANFIETEQLLEIEKFRSSLLQIRGSIPLLWEQIVDLSYKPHLRIISHEQTPNIVERHFNDLLQRYGEIVAVDLTDKHGEEGQLSAAYAAEMKNQQKVRYVSFDFHHHCGNSNFDNLKILYYQILEDFEKQRYFLIDGKGKILEEQRGVIRANCIDCLDRTNVTQSHLAQKSLNLQLQRLGVLTPLECISMFGEEYGKFRTLWAEQGDEISLEYAGTNALKGDLVRYGKQTITGTIRDGMSALSRYYLNNFHDGIRQDALDLISGHYTVSRNNPSPFQLNSFESFSYLPVASALIIGGLTITTFTLQQAGQNSQQYVSSLLCAGATAGVMAIVKANGRQFCSRPRLCGLL*
>comp51569_c0_seq2
MAAGPKKIIIDTDPGIDDAMAIFLALRSPEVEVIGLTTIFGNVYTTLATRNALHLLEVAGRTDIPVAEGSHVTLTKGTKLRIADFVHGANGLGNQNFPPPKGKPLEDSAAAFLVHQAKLNPGNVTVVALGPLTNIALAIQLDPEFSKNIGQIVLLGGAFAVNGNVNPAAEANIFGDPDAADVVFTSGADVLAVGINVTHQVVLTGTDREKLASSNGKFAQYLTKILEVYFSYHREAYNTKGVYLHDPTAILAAADPSLVTCMEGIVRVQTSGITRGLTVLYNKQKRFGEITEWSNKPTVKVAVTVDAPRVVKLVMDRLMDS*
>comp224257_c0_seq1
MGFPFLESEITIHLHHSTR*
>comp54351_c0_seq3
MGEVSETMTKKKKKGRPSLLDLQKRSLKKQHQQQQQLQCQQQNLNLTNSHSNTSRKPLPGFTQEVPEPEGIAVDDDDERKKKKHKLLVGLNSHLHHPTLSALNSVPHGADWNHDGVDPEATHKRRKIDETDGKIPKATDSKHGSQGESGPTTPLPDKKLLLFILDRLQKKDTHGVFSEPVDPEELPDYHDIIKHPMDFGTVRNKLDGGLYTNLEQFENDVLLICSNAMQYNSPDTIYYRQARAMQEMARKDFENLRQDSDDSEPQPKIVQRGRPPGKHTRKSLGMSPSERVGPESSSDATLASGGDIASGSNGYNLRKGLSKLQPADSLARASHSNFNSGGYTSWLSEWENEFPASVLKAVLRYGKKQFMVDETRRDTYKHQVAFGNEPPVLATVEDEFKQLLAVGLHVKHSYARSLAHFAADLGPVVWKIAARKISSVLPIGHEFGPGWIGEDDVSQRQHFPACDECRTSDSHVPEDYRSRFPSSSGSILEANRSCLQSGDVVINRGLNYQNELNPVNSVGGGIESMVPLRIQQESKVHSDDFFGSNGRLGSNFSPQMKMVRLADLTGSSSAGNVPQMLDMDPISSASCMAATNINPPFKAQFLNKLSQSDSSNLLARESGFEFQSLSQGLAGKSSWQGLEVPNKQNSMSLANDLNGRTGTTNPLSSNAETGPQLPPNLALQL*
>comp47918_c0_seq1
MSWWSGLRELRPLVHLLLPLSIHWVAEEMTVSVLVDVTTAALCPGESTCSKAIYINGVQQTIVGIFKMVVLPLLGQLSDECGRKPLLLITMSTTIFSFALLVWNQSEEFVYAYYGVRTISYIISQGSIFCISVAYVADVVSESKRAAVFSWITGLFSASHVLGNVLARFLPEKYIFVVSIVLLIFCPLYMQFFLVETVVVAPRKNRESGCCTKIIDVLYQRYKSMRKAAEIVISSPTLRGMALVSFFYELGMSGISNILLYYLKAVFGFNKNQFSELLMMVGIGSIFSQMLLLPLLNPLVGEKVILCFALLASISYAWLYGLAWAPWVPYLSASFGIIYVLVKPSTYAIISKASSSTNQGKAQSFIAGVQSISDLLSPIAMSPLTSWFLSSNAPFECKGFSIICASICMMISLCFACLLKPDASSSNDIEGNPETPLLSDN*
>comp39236_c0_seq1
MDSRSTVKGAFGLNPIYMSHVKRLVRSTHGNQLFMGQGSRHKIGTKNLHPIKRSKT*
>comp35678_c0_seq1
MLTIKRVPTVVSNYQEDDSDKGFLGCGRNCLGSCCLPVSKLPLYLFKKDGELPMEAGLVESSEEVSEMSFLHNLLLGQWEDRMNRGLFRYDVTLCETKIIPGQHGFIAQLNEGRHLKKRPTEFRVDQVLQPFDENKFNFTKVGQEEVLFMFEQSIDHKSHFVANSPVDKISASPNVVAINVSPIEYGHVLLIPRVLDCLPQRIDHDSFLLAIHMAKEAADPFFRLGYNSLGAFATINHLHFQAYYLAAPFPVEKAEKQIIAVDKGQCPQGVYVSQLLNYPVRGLVFEGGNTVRDLSDTVASSLVFLQNNNIPFNVLISDCGKRIYLFPQCFAERQALGEVSQEILKAQVNPAVWEISGHIVLKRRVNFDEASEAYAWKLLAEVSLPEERFQEVKAYILEAAGLLREVDVTENYMINGELVQNYGPTTRRAAPQLPRDCLIQ*
>comp130748_c0_seq1
YTRIPSQNSSDFSTHLRPGGLLPLPKLELHFIEKVPQHHGWVD*
>comp15290_c0_seq1
MVHDVLVKITELVAALAQSRFCHVFLCLRDGVECDPHPVAPGIALVCSD*
>comp48642_c1_seq1
MHEIQSVIRRRGADTGFIVEGGKYLASRKKMKKAIQKALGNLKGIKNEIMDSSSNKDNEILSMLRILKEAEAV
>comp45052_c0_seq1
MSTNCMYTQSLYIRPHKALNFHIYFPNSFTFTFPHIQYWIPKTTVNASSPISHKVIKQ*
>comp55287_c0_seq1
MHRHYKMLIDIFPTDEIKPSKLRAFFFLGKLISIR*
>comp35248_c1_seq1
MYLEDRTVRLQLWDTAGQERFRSLIPSYIRDSTVAVVVYDITNANSFHQTSKWIDDVRTERGSDVIIMLVGNKTDLSDKRQVSTEEGERKAKELNVMFIETSAKAGYNVKQLVR
>comp366069_c0_seq1
MEWASQSSLTAAIQERKENESPCLKRLASEVEPTGYQISDMIRAIFRFSTVPAGQRRSNSLNGFQRITKPVTQPMHGSSDTNTEPG
>comp48265_c1_seq1
MGPKTLCNACGVRYKSGRLVPEYRPAASPTFVLTKHSNSHRKVVELRRQKEMVQQHQQQQEQFLQQHQNMMFDHVSNGDDYLIHQHVGPHFTQMI*
>comp37187_c0_seq1
MSRLFTEREKQMNNHLLPEEIEEFLGNPTRSIRSFFSDRWSELHLGSNPTERSTRDQ
>comp37659_c0_seq3
MLHSFSLPCSKSNHASTMAIPSLFLCTTSFHLSRQSPSFPFTRHPFKPPGLRSAPLPVMGRDYPSLLDLKGGKGMSGFFDVELKVRDYELDQYGVVNNAVYASYCQHGRHEFLESIGINCDAVARSGDALALSELSFKFLAPLRSGDKFVVKVRISGSSAARLYFDHFIFKLPNQEPILEAKATAVWLDKNYRPVRIPAEMKSRFVKFLRNDNS*
>comp48939_c0_seq2
MRTLNLTNLRIGHCCQVLSPKTPFLVPCSEIRNLTLTITKPTRSAISCKNRCSYPLGSLVRASMASSTSSTGAETETKPFSVLFVCLGNICRSPAAEGVFTDLVKKRGLHSNFKIDSAGTIDYHEGNEADPRMRAASKRRGVQITSISRPIKPSDFIDFDLILAMDKQNREDILEAFNRWKFRQTLPADAHKKVKLMCSYCKKHDETEVPDPYYGGPQGFEKVLDLLEDACESLLDNILAENKHIQES*
>comp44953_c0_seq2
MKEELKMIEKNDTWELVDRPQHKQPIGVKWVYRTKLNSDGSINKYKARLVVKGYAQVFGVDFSETFAPVACLDTIRMLRALIAHKGWKVYHLDVKSAFLNGYLQEEIYVEQPEGFQIKGEEEKVYKLKKALYGLKQAPRAWYSRINDHLHDLGFVKSPSEAALYVKFVDANLIIIAVYVDDLLVTGSDEKLIKEFKTEMLKAFEMTDLGLMSFFLGMEVKQDHDGVFICQKKYAKEILKKFHMEDCKSTTTPLNQKEKFSKDDGADKVDENHYRSLIGCLMYLTATIPDILFAVSILSRFMHCTSEVHFQAAKRVVRYIKGTLDFGVMYSHSHKFKLHGYCFTFGSGVFSWCSKKQEVIAQSTAEAEYVAAVAAVNQAHWIRKIMTDLHMEQEESTQIFVDNQAAISIANDPVFHGKTKHFKIKLFLLREVQREGEVKLLYCKTENQSADILTKALPKARFEYCSSKVKEEC*
>comp179888_c0_seq1
MADAFLDFVCHLLYMNLCKCALCIFFIKIKNVHYLSRCYELLGCCICRIP
>comp8620_c0_seq1
MWRRRKLDCNFALFDSSHVKGMVFVKLRIELALLLDWRVVVSGLQKFSVEEFHCMPNVIAVGGKHRNVVWTCTQ*
>comp59141_c0_seq15
MRVIVPLQGVVQGRGGLFWGSVIPCALFYFLQLYFNRPRHPSQPHSPTSSHNLPDPEPRILLSPTGSAYVSGRANSIAAMTGDFPCYVGLHKFAENPYHEIDNPDGVIQLGLAQNTLSLDLIQDWIRENGSDAILGRGGNCCGLNIRGIATYQPSDGLMEFKVAVAGFMSQVMEKSVFLNPSQMVLTAGATPAIEILSFCLADNGNAFLVPTPHSPGFDGDVKCRTGVEIVPVPCRSADNFNLSITALDRAFNQAKKRGQKVRGIIITNPSNPVGNLLNQEILYSLLDFAREKNIHIIFDEIFAGSANGNEEFVSMAEIMEAEDLDRDRVHIVFGLSNYLSFPGFKVGVIYSYNENVLAASSKLARFSAISAPTQRLLISMLSDTRFVQKFIEINRLRLQKMHDTFVAGLKQLGIECTRSSGGFYCWADMSRLIRSYSEKGELELWDRLLNVAKINVTPGSSCHCIEPGWFRFCFTTLTEKDISVVMERIRRISEATKSHS*
>comp40795_c0_seq1
MTSVVVMLSAADSALPQPKEPVFSKEKVSIQRQSSSGKQMSSSTNELTMSVLEAR*
>comp537310_c0_seq1
RVVPHTFRCASSTQANAIRINVSIKRNITYKIINAFGLSCILDDAYRIYGVKNKLC*
>comp86486_c0_seq1
MLLACGIVYVVSGILCIGFLKRSRQKQEITREQAAKDLEDLERRREELEQLLMTE*
>comp59319_c0_seq7
MEDRENLTMQIRNLELEMNTIKNKKSEDEEQIRANSHEISHLREEKLELHDKIAELEKRSAEREFEFSVLQDKLNKVEDEGSAQIMTFTEQINNLQHDLVSLQNEKQELAQQCERLKLEVDSIDSQKSEVEEQIRAKDRENSELKEENLGLQGKITVLQKTLAEKEVEFSTLQDKLHDKENEASGQILAFTAQVNNLQKDLLSLHKTKEELELQCERVKEEHAESLMMVENERNELASKTIDHQRTLEEREDAYQKLNEEYKQIDSWFKECKVKFEVAEKKIEEMTEEFHKGIESKDQMIADLEHTVEDLKRDLEEKGDEIGTLVDNVRMLEVKLRLSNQKLRVTEQLLSEKEESFRKTEEKFQQDQRALEDRVATLSAIIAANNEAYQEITTNIKECVNSVMAGIETVSWKFSDDYKKYENCISNISHELQVAKNCVRVMNKEKEQLRKDTHHLSEQLQDKNEQELALREMVEKIEAKASKEELAKKNLTTTVVQLNKTVGELEKMMKEKDDGMLYLGEEKREAIRQLCLWIDYHRSRYDYLKDILSRTRRGQRAT*
>comp45010_c0_seq1
MATTTAGNGKTVTGYPPPQNEAAAGYPAGAAAHPFAVPPPSSYYSFHQEPAPASYYPPPPPPPRTSFLCRLLTGVAIGFAVFGSISLIIWLALKPRFPAFRVDSATVTSLGATGTELNATWDITFVVRNPNRKLSLSYESIDAKVWYGLDGLASTRLPPLFQGTLSESRVRVQFSVVNEYVDRSVTRGIAAERARGSVNFGVTVLAWVRFKS
>comp39522_c0_seq1
MESKFFTTVVRLAISSIHARNSMSMGSLLRSHNHRHMLTVGSKPASDSCTMV
>comp15568_c0_seq1
YFPAEALKVTTLLSLTRNSIYSVSACKILK*
>comp182070_c0_seq1
MARCQSFRTRIYSDFELTSGKNPISESHLSNLKSICPPIEGGDNNITAMDYVTPNLFDNSFYQLLLNGEGLLNSDQEMYSSVFGVVTRELVKKFAADPLAFFQQFSESMVKMGNITNSESFITGEVRKNCRFVNT*
>comp59911_c1_seq1
MYLHIIILIAKYE*NISYITKCGSSN*QGKREREVVQDTSIRFDFHIKPRIVKKKKKK
>comp49710_c0_seq1
ILSNLLFHLFFIAAYSLSGSCTFHFITDYR*
>comp8277_c0_seq1
MIVFEDGCHGMQVHWCRLWVQHHFISSFKAFPWFGQSHFYLLFFIIKKKCKFYFLIFVTKEVLNLVCGEGRLKCKVKRYHLSCSSWVEAESLINTFICYCRDNSKLCS
>comp368996_c0_seq1
RIWDTASGQCLKTLIDDDNPPVSFVKFSPNGKYILAATLDNTLKLWDYSKGKCLKTYTGHKNEKYCIFANFSVTGGKWIVSGSEDNLVYIWNLQTKEIVQKLSGHTDVVLCTTCHPTENIIASAALEQDKTIKLWKSDT*
>comp54404_c0_seq2
MEALKLWNLTSKPLKHLFHFATSSTPTTTFAFRRTPRRLVLRCCSSSATNVDNGAARAAGRNRRSSSPSSSTSDRDAVRAVRLKKVEELRSKGLDPYAYGWDKTHSANQLQDIYRDLENGEEKNSENDHVSVAGRIVARRAFGKLAFLTLRDDSGIIQLYCDKERLIGDQFEQLKAHVDIGDILGARGSIKRTEKGELSVCVLSFAILTKSLLPLPDKYHGLTDIDKRYRQRYVDMIANPEVVDVFRKRAKVVSEIRRTMDSLGFIEVETPVLQGAAGGAEARPFITYHNSLGRELYLRIATELHLKRMLVGGFEKVYEIGRIFRNEGISTRHNPEFTTIEIYEAYSDYQSMMNMVEEIVTQCALVVHGKLTIDYQGVEICLERPWRRETMHNLVKETAGIDFNELGNDLGVAKEVTLRTLGKNLDSKDKASIEACQSVGHLLNEVFEIFVEPKLIQPTFVLDYPVEISPLAKPHRRSTGLTERFELFICGRELANAFSELTDPVDQRGRLEDQIRQHEKKRAEAVSTNADKKEGMENEDELYEVTLDDDFLTALEYGMPPASGMGLGIDRLVMLLTNSPSIRDVIAFPVLKVQQ*
>comp10789_c0_seq1
LATTYHHRWASTIHFRRPRTKKHPFAIIPRHLYCSFLLISCFNFLLINIERKRIAFQRWLLLDTADATEETSSI*
>comp47233_c0_seq1
MVRVIPMASAIRPSLSSFSFSSAASRFCPSLSSSNPSRRLSFFHLHSAVPQSHGFGLKASSRLLGQDGNSMRVMASGNVSQAASPENVLEWVKQDKRRMLHVVYRVGDLDRTIKFYTECLGMKLLRKRDIPEERYTNAFLGYGPEDSHFVIELTYNYGVDKYDIGTGFGHFGIAVDDVTKTVELIRAKGGKITREPGPVKGGSTVIAFIEDPDGYKFELLERGPTPEPLCQVMLRVGDLNRSIEFYEKAFGMELLRTRDNPEYKYTVAMLGYGPEDKSAVLELTYNYGVTKYDKGNAYAQIAIGTDDVYKTAEAIKLAGGKITREPGPLPGISTKITACLDPDGWKSVFVDNVDFLKELE*
>comp28685_c0_seq1
MFFQNHLCLHFRHMHKHTHYPNAETYLHSLQHANIAVGFFLMIFILLENKKHTLIHFHCEA*
>comp351584_c0_seq1
MTANPSQQSYMVGQLWSALENDNSDRQPLIQIATWCIGEFGDMLLSPDSNVQISETEVIAVYHRLLTSPQNSPITKQYCLTSLTKLSTRFQHPDTHKIQELIESFGSHVQMELQQRGVEYSQLFGKY
>comp58641_c1_seq1
MSHAIQLDVLCSFTPLPWLMGIKVHLEMDLAGVTQYYSMLLHFCCNEQSN
>comp27290_c0_seq1
MAQIVNLSPPILSIRNSLVGCPESSRSQFGAQTQYHSINQSWSSLQQKLKSNGRFLCLFSDSKREEQARKALEGALSGKKNEFEKWDKEIKRREELGGGGDTGGGGWFGWGGRFGWSNDDNFWQEAKQASLTILGIVLMYLLVAKGDLILAVIFNPLLYGLRGVRNGFGFLTLKVLKNTSTGNQHDFDGFLKKEDYERASAKENVVRKWGSD*
>comp40265_c0_seq2
MKCMQGHDDAFTRLASFVCDSDQDQPFSDQDLQAIEAIEARFQSSLPKKRPFNPNNDAIATTTAHSPRRLPRSLLALQHPNAFSLSPCQGYSRMRLPAMKFSGQIMYSRTFDEVEKAATKLLQILEEKKREMLQIALGFDIEWRPSFLKGVPPGKVAVMQICGGTSDCHVLHLIHSGIPRNLQLLLEDPIVLKVGAGIGGDAVKIFRDYNISIKGVEDLSFHANRKLGGGPQKWGLASLTEKLISKKLKKPSKIRLGNWETDVLSKEQLEYAATDAFASWYLYQAIKDLPDAQEVIESVPQQ*
>comp128698_c0_seq1
MRVLISFVFSISQFFLIMYLGVSVSNVFSLNYGIKYQQINEGKKMS*
>comp41418_c0_seq1
MFKKQQRSRNSFCFLIEKQTRNAPSLLKQRNTEEIRRIFHLGQGGDQV**KKPSYKVLKLYYKTIQAIQYKQHSHPQFKNQTSPLSLSPLSISLSKMEAKCQSCCLKI
>comp39576_c0_seq1
HDTHDLKEKHAFVWFVDLPQHFQSAN*
>comp36836_c0_seq1
MTLQLALPAPTTTTSKINLLHCFSLKREHLTLHQLALNKALTNKVLLHFNFSFSLFFLKKL*RN*T*GFYYKVSTC*KLRV*FSSILSFILLHIIKLRIII
>comp8290_c0_seq1
IKKVIHSTLTRLSVSILHPKSVFKGSRDGHNHLAEINHALTCYIYVDQVSCILFYFAAHYAD*
>comp39790_c0_seq1
MELIIYMQYQLWPPPESAVNSAATAKGTLGNLPQKHYKFILSRTSIDINANGTNERDW*
>comp366636_c0_seq1
MSTDQLILTYYLERLSEQTALNNPSYGMMTVKMQLILAHSLLRIEILNCRNLLPTDSNGSCDPYVKIQLLPEEKFSGVTKPRTKIHKKTIFPLFDETFQIQLSKEQAEINSALVHFVVKDQDFLGIMSSQFVAESFIPLADIPIT
>comp234891_c0_seq1
MLFPCYSVPQQSTEELSFGFFQQRLIKYPVYIPKTLVTCNSRSAK
>comp184263_c0_seq1
MAAWMELRHKQRKKRQLEPDVGVKQPLQRNLYCKDIIVVSHHLTS
>comp58220_c1_seq2
MQLKRCDSKMIQKTHLKVKKRQLNPKLLVEIVSCMKKK*SSTPNDDDKPYWTLYKGKPIKNRTVPPLEIAIDT*VLNTNFPLSLSQN*E*GPP*PPNYMHIPPPWFKGLSVISTNVIKPTVKGEDI*
>comp23479_c0_seq1
MRKKLINTWQNIPFSRHSSNAQLKDLHNNTTVSATWVHQFKILFLIEVGNISHYHKIINFQVTISNHRMKNKR*
>comp163849_c0_seq1
MKVLKFTFLGNKKRLLHCSIICCAFMYPQFTPSVIVCLTLKLVTPHKTPSGRIGESAFLESNVIFQQSLSF*
>comp37071_c0_seq1
LRTQIRVVNAFRDSLDTRYSSDILARNAAQVSRIRLAASKDSRLNQIT*
>comp59091_c1_seq47
MWSTSLQLLSKMVEREIEFQITAECSLTEPHVAHVMSEALSSESALFLGNSMPIRDADMYGHGWSISSQSVTSLMLNSDLPINLVRVAANRGANGIDGLLSTAIGFAVGCNKKVFCVIGDISLLHDTNGLAILNQRKLRKPMTILVVNNRGGAIFSLLPLADKVEPSILHQYFYTSHNISIHGLCMAHGIKHLHVKTKLELEEALCVAQHEEMDCIVEIESSIDANANFHSILKRFALQTAQRTIRFLSLPFSRSTIKDEFYLCKISKIECSKYRIALCAPPTSASVGDNRKEFYREGFILSLILEDGSVGFGEVAPLEIHRENLVDAEYQLRFLIHVMERVDIICFLSLLKGSFSYWIWNELGILPSSIFPSVRCGLEMAILNAIADAKGSNLLNILHPPTIEKDKCETSSEVQICALIDSNGSPTEVANVAATLVEEGFSAIKMKVARRGNPMQCATLIQEVRKKVGRQIVIRADANRNWTYEEAMEFSSLVKDCDLQYIEEPVQDEDDILKFCEESGLPVALDETVEIQENPLEKLVKFTHPGIVAVVIKPSVVGGFENAALIAQWAHQLGKMAVISAAFESSLSLSAYIQFSSYLEMLSLGTFKVLDDKAAPSVAHGLGTYLWLKEDVTNYPLLIGRNPHSGFVEASVANASRLLHDFQVNQNVICNIITGEQVRRYQLTVELRHLSCSFEVQETGQITNDNVLVFLHGFLGTGEDWITIMKTFSGSARCIAIDLPGHGKSIVHGVKEPGEEPWLSLEIIADVLHKLIHQITPEKVTLVGYSMGARIALYMALRFSSKTNGAVLISGSPGLKDKLSRKIRAAKDDSRACSMVAHGLQLFLNSWYAGELWKSLRSHPHFNRIIASRLQHDDMQSLAKMLSGLSIGRQPSLWEDLPNCRIPLLLIHGEKDTKFKKIAQAMINTICSGVGSKHEKWNNIHEVVEVPNCGHAVHLENPLSVIAALRQFVTRL*KV*KYRALCNFRHLPCTQLALISQVMVP*
>comp39745_c1_seq1
MQYVLVYPMCTGYGNHLGVPMFKTAKLHKWLHFPINSNSSTINFCYELCFREGTYKKWMINDHNSSVKFRRCWSDIDDVTYH*
>comp188018_c0_seq1
MILTT*TSQLDCFEYSVNLGQKGRVTIHQTHSLVKFDEGNQCANL*HYCTHI*YI*CSGDEIHIFPAKSRPG*SLYNYEKV*CIFQKKKATRIQGSMYKLIKHTISDLDPFM*
>comp16050_c0_seq1
NSHPQSEDIHVLLNIIANQIYLEGHIDTLS*
>comp58463_c2_seq1
MIFTPSGLYLMIFRFLACFSILEGGKLSGSLYLGIFVSAE*
>comp44134_c0_seq1
MQYQKKNVENVWKKKTSDQGSWNAKIKSKSSCTRSLIEIVIWGTEHSPEASRRRRLVKITSIRFYGNQGLRASEENGKF*
>comp56998_c0_seq6
MGRSRGNFHNADEDPNQRSRRKKNHANGDNSESGAAGQGTSDGKRALYHCNYCNKDITGKIRIKCAMCPDFDLCIECFSVGAEVTPHKSNHPYRVMDNLSFPLICPDWNADDEILLLEGIEMYGLGNWTEVAEHVGTKNKELCIEHYKNVYLNSPFFPLPDMSHVVGKNRKELLAMAKGQGEDKKGISIGDLGLKEESPFSPPRVKVEDSHKAGPSSRLLSSLNSESESGPSANTHAAVAANPKASNAARGKDGPGVIKMEDPQLDRNFGGKKPSSSGNEGPSLVEMSGYNTKRHEFDPEYDNDAEQLLAEMEFKDTDTEEERELKLRVLRIYSKRLDERKHRKDFILERNLLDPNPFEKDLTPEESAICRKYDMFMRFLTKEEHEELLRTVISEHRTLKRIQELKEARAAGCRTSAEGDRYLEHKRRREAEESARRAKESAQVGPSNQGVTNAFMSPDSVGKDLSARPAGPAASSSVNEMDVAGYYGADLLSEPEKRLCIELRLPPAMYLTMQEQLSLQILGGNVSSKSDAHLLFKMDTIKIDRVYDMLIKKGIGSP*
>comp55075_c1_seq2
MSFLQGLIDSFSSIFSSDDSSHPNPTASAMEGVSNERVAYKLKGYFDLATQEIAKAVRAEEWGLIDDALLHYKNAQRILVEANSTPVPSFITSSEQEKVQSYRQKISKWQGQVSERLQTLSRRAGSSSANQSTSKHARTAAVPITPSNARKDVLQKYPQRTGQVNKVGSQKSSQAAGVNYDTKLVEMINTAIVDRSPSVRWEDVAGLEKAKQALMEMVILPTKRRDLFTGLRRPAKGLLLFGPPGNGKTMLAKAVASESEATFFNVSAASLTSKWVGEGEKLVRTLFMVAISRQPSVIFIDEIDSIMSTRLANENDASRRLKSEFLIQFDGVTSNPNDIVIVIGATNKPQELDDAVLRRLVKRIYIPLPAENVRRLLLKHKLKGQAFSLPSRDLERLVKETEGYSGSDLQALCEEAAMMPIRELGADILTVKANQVRGLRYEDFKKAMAVIRPSLNKSKWEELERWNEEFGSN*
>comp50300_c0_seq1
MARKQREQSKLCGKRSFQEVYNDSNTSSSNNFPEKRSNSQDLLFSSRIGLENARFFDFRNLDKDRIIADSPSSSLASWNFSYMANSTNSTSPVADSFGKEGRDYFNNACSNIYLSECSKSSDRFLYRIYPNPSSISSFRGSTTFALPNYRRVVPSPFGFLGSAENGRIKRDLMSLSDNSSTFTKLKASTEQEQADESNIEQKEVPFIDFLGVGVSSS*
>comp45854_c1_seq1
EEGEFSEAREDLAALEKDYEEVGAEATEGEEGDDGDEY*
>comp45068_c0_seq1
MTLAQMINQPASSSTQQPFPIKNKFTPLNFPKTVEPAKPLNSYFEKPDYLLIMMIRQEWFSIPRYQIAIKLFP*
>comp42524_c0_seq1
MLSSLMGLLLIHKHIRTMLLLVVQFILSFLTLTRSQSSVCRSSCGDIPIRYPFGLDDGCGSPYYRHILVCSDSGKLELRTPSGRYPVRNLSYADPHIVVTDPFMWSCEDGENFRPTRPFSLDTSTHFKLSPQNEYIFFNCSEDNVIIQPKPMFCEHFPEHCDSSCDSASYLCRHLPGCSFALSRSSCCSYYPKATESLRLMLKYCTSYASVYWRNVGSPQPYDQVPEYGIRVDFDIPVTTRCLQCQDPLKGGGTCGFDTGTQSFMCLCKDGNSTTHCKDYDIAQHNRRVHVIAGTVTAVSAAGAFGIGAGIWYLKKVRAKAPVTCGVQSNENRLF*
>comp57813_c0_seq2
MDSRKCKPSGGASSLSVANQVDEMARSLKDMGAIGRAVETDVDVDLREVYFLIMHFLSAGPCQRTFGQLWNELLEHQLLPRRYHAWFSRSGLCSGDNVDDDDGMSLPLNYNKLVDRYPHIAKDHLVKLLKQLMLSTAHPLHEKLGGSSPNAADVPTLLGYGSFSLLDIDRKTADKQVKPPPVYLRWPHMQANQVQGLSLREIGGGFTKHHRAPSIRSACYAIAKPSTMVQKMQNIKKLRGHRVAVYCAIFDRLGRYVISGSDDRLVKIWSMETAFCLASCRGHEGDITDLAVSSNNALVASASNDFVIRVWRLPDGMPISVLRGHTGAVNTIAFSPRPSAVYQLLSSSDDGTCRIWDARYSQCNPRIYLPRPSDAITGKSNAPPANLPSSSNGQQSYQILCCAYNANGTVFVTGSSDTFARVWSAFKPNSDDSEQPIHEMDLLSGHENDVNYVQFSGCSVASKFLTSDSWKEEHTPKFRNFWFCHDNIVTCSRDGSAIIWVPRSRRSHGKVGRWTRAYHLKVPPPPLPPQPPRGGPRQRFLPTPRGVNMIVWSLDNRFVLAAIMDCRICVWNAVDGSLVHSLTGHTASSYVLDVHPFNPRIAMSAGYDGRTIVWDIWEGIPIQTYEIGRFKLVDGKFSPDGTSIVLSDDVGQIYFLNTGQGESQKDAKYDQFFLGDYRPLVQDTQGNVLDQETQLPPHRRNIQEPICDSSMVPYPEPYQSQFQQRRLGALGIEWRPSLIKYVVGPDFSVGQDYQVIPLADLEGMLEPQPEFIDAMFWEPEYDIVSDDADSEYNVNEDNSSAAEQGSVSAISSSDLESSEDDSSNRDGLRRSRRKKHNVEVELMTSSGRRVRKRNLDECDGNPSGSNRTKKSKGSSKSSKRKSSKTKTLRPQRIAARNARNMFSQIGETSTDGEDDDSEDESSDSLPDSDILSEPERKMHNKLDELKQPFLEEFANVAKPPAHSESQVNVENRRRLVLKFSLRDSKKNVPLEDTRLACETQANMVCQSSRPQENVQKTLPDRSSMDPALSFTDVTNAELPQSHNRNEHTDKTHTENAMNHLDKSICVEGNTVQCREMKRHSYKLSRSGDVLLTDTEFDGHLEHNANGRSEHMMTSNLETVGSMIHAEPADLDNALKLSSLEPSLLGKHQRNGDGSLTSGYDKLNDGDKGWSGSDKCTEDLLEKNEVVHSSHSRDLKMKAPMKSTKLVIKKKQISADIEGPCKLKFVSSKEDSTGARGDVISGNSSFIGPNLVMEVPEEDGDNRKLSSPLLLHSYSGKRSYVHGHEGDKLYKGEVNPDGFVCDLKENTSIVSNQHGLEIGLSDVVSDPIRRTRSTRMKTTSEEPNALNIRIKVRGQNSRGTSSREESSIKVSDQLHRRTRPTRDRHGEYIANDPGILTRRMSNHHVKKLSWLMLSEHEEGYRYIPQLGDEVVYLRQGHQEYIESCQPTESGPWRLFTGLSAFEICKVEELDYAQVSGSGDSCCKLKLRFVDPSSYVHGKSFKLTLPELINFSDFVVEKTWYDTAMRRNWSSRDKCMVWWKNENEEGGSWWEGRILSVQAKSHDFPDSPWERYLIQYKTDPTESHLHSPWELYDPEILWEHPHIDHEIRDKLLSYFTKLDHRDSYCIQALNQVAEKSDFSNRFPVQLYPELIQSRLKNDYYRSVEGVKHDIMVMLSNAEDFITKNVQLLGKIRRLSDWFRRKLERI*
>comp231729_c0_seq1
FTVSLSGNFGFCLLGSNIIVIFEFYPAQNL*
>comp52128_c0_seq9
MQRLEEKLSDMETENQILRQQALLTSSSRRMSGKFSSATVPPLENGHQAPPSSTLAKTFGTEADSKLRRSQMERQQESVDALFKCVTEDLGFTEGKPVAAFTIYNCLLHWRSFEAEKTSIFDRLIQLIGSAIEDQDNNDCMAYWLSNTSALLFHLQRCLRIPTARKPPTPTSFFGRMTQGFRSSSNSLSSNALDVVHQVDAKYPALLFKQQLAAYVEKIYGIIRDNVKKDLSPLLSSCIQAPRTSRGSTLKSAGQLNDNSPTTSSWNNIIGCLNRFLKMLKENYVPPVLVQKLFNQVFQYINVELFNSLLLHRECCTFSNGEYVKSGLAELELWCSEATEEYADSSWDELKHAREAVRFLVVQQKDRLTYDDLSNDLCPILSAHQLYKMCTLYWDDNDNTQSVPPDVTSSLKLLMTDGVDDDSKSFLLDDNSSIPIAVEEISSSLQDKTIPRVKPPAELLKNPSFQFLHDYY*
>comp32918_c0_seq1
MRCIRSQADSLLAGLPSKEATAMALGLAHSLSRYKLKFSPDKVDTMIVQAICLLDELDKELNNYTMRCREWYGWHFPELGKILTDNVVFVKTVKLMGTRDHAASTDLSDILPEEVEEKVKEAAEVSMGT
>comp4096_c0_seq1
MRPFCVESDFGNHDAKGPSFTNCKKIFRVNAIVLRAVRRSV*
>comp49906_c0_seq1
MGCFQDANCYRGSLCCQLILFFIWLPTFQDVTAQETHVDPRRVSSLLELAKEPTSGESGLFDPIEISPAVIPQYPYPTEPLPPMYPTFPTRYEPVLTGKCPVNFSDISNVLDKTASDCSGPLAALVGNVICCPQFSSLIHIFQGFFSMNSDNLVLPNAVADHCFSDIISILASRGANSTIPTLCSIKPSNFTSGSCPVKDVSTFEKTVNTSKLLEACSTVDPLKECCRPICQLAIMDAALQISGRQMMMNDNKNVVGEVNHTDYLNDCKGVVYSYLSKKLSFEAANTAFRILSACKVNKVCPLTFKEPSEVISACQNVAAPSPSCCSSLNTYIAGIQKQMLITNKQAIICATLFGSMLRRGGVMTNIYELCDVDLKDFSIQAYGLQQGCLLRSLPADVIFDNSSGFSFTCDLSDNIAAPWPSSSSITSVSLCAPEMSLPALPTSQTLKNIGCNSGGVGFLVLIFSFLIFSTLLY*
>comp379573_c0_seq1
MFSYLSQFLVCQWNCLKEFKKQNRSSPDVQESVFHSFKQSSNKMSSILYYWTYSNL*
>comp7949_c0_seq1
MPPQEYGPMTVPMVSTNSSPPIAMPVQVPHGHVVQQIVDESGTLRHVILSPQHPPPLLPIPQHFGAGNPSGSTQGPQSFYPGTLPHGYHQPFTPLQPGVLGHGPPQGHSPPPHSFHKDERSVRQYN
>comp21031_c0_seq1
MTQEEQTVLVDGQQATTDAAAKKDATGGDQPAKVEDASAGAESNKATNNDGGEGRAQMRAFFQQLSISRMKSMRKLSPAAKAAKAARQ
>comp53932_c1_seq2
HLSLSFLHLIGKAKKVLCRCRIKLYFLSVKILSIFYCDFKLNWIFVTVKEGKGLKCTEFGSNIP*
>comp204676_c0_seq1
MLQCVCMSLCH*SRILIY*ISINLIHYKPTS*TCTSIAHQTYKVLLHCF*NYKEQ*FL*ETFYCC*YSLSWTPGT*IA*NLQIRFYLDKSNFTSRLGS*RYKTLLHSKVELTSLYSS*LHQIKNTQMLC*
>comp49756_c1_seq1
MASFLLFVSKKVSKDSSQSHTCLNKMGVAKWMNRTLVENMRAMLRTARQPNFFWAEAANTTYHVINRSPSTAIELKTPMEMWTSKSTNYSNLYIFGCLVYVM
>comp292525_c0_seq1
MKKLVAVRVRREAFGDGRGEKEGLIQKPAFFLLKIIMNFSPSIGSVDCASSLSSVGLV*
>comp50241_c0_seq3
MMACPEPVSAEGETMSVDAAPRKPRILLAASGSVAAVKFANLCHCFSEWAEVRAVSTRASLHFIDRTSIPKDVILYTDEDEWSSWKKLGDSVLHIELRRWADIMVIAPLSANTLGKIAGGLCDNLLTCIVRAWDYSKPLFVAPAMNTFMWNNPFTERHLISIDELGISLIPPVTKRLACGDYGNGAMAEPSTIYSTVRLFYESKAQHVNGDI*
>comp43450_c0_seq1
MLILVMILSYAFWKINPFELSFVLRHQQCVFLVLYSTSSSFHLYGARKLLGVDRFFPVTCSILTVYTR*
>comp10455_c0_seq1
MLFLDKFLGICLAYSAVAVCLLHFSCPFVFRYISIIIIKVLKFHMN*
>comp410588_c0_seq1
PLKEIFCSSITESAINRSDIFFPSLPLSFSNLIFLPRISLGSQQVCFGIWFQFQGNFHLLGSFDAFSSLSFPLLSSSSSVLEDILSSL*
>comp53125_c0_seq3
MNSLLLVSTHPTHSFHGFPHSSTTRTFNLFLRQPPTLRHFLFFTSKFNSPHFIACCSFPSRQSSDSGAFVPGSKALEDEAILQNERLHSEVGSPKIPSLASPLPKFSLTDQAFFLLAFIACTTSVAFTSLVFAAVPTLFAMRNAAISLSKLADTAREELPSTMAAIRLSGMEISDLTLELSDLSQEIADGVSKSAQALQAAETGIRQIGSLAHQQTISMIQERASLPIISLQPVVAGAARNTSRAVGRATKSFMNIISGREGTAEYDEDDRTNM*
>comp17704_c0_seq1
MAPEVLEGAINFSRDAFLRIDMYACGLILWELASRCNALETPGEYQLPFEEEVGLHPTLEDMQECVVHKKQRPVLRNSWKSHPGLVVFCDTMEECWDHD
>comp153936_c0_seq1
MRNTILSVYQPSHLSRLVPTMQSFIESATQNLESPKEDIIFSNLSLRLATDVIGQAAFGVNFGLSRPHSVRDSIKSVNNVGDENAGASDGVSDFINQHIYSTT
>comp55919_c0_seq3
MAFLLPNLQPSVLTQSKSKDKPLHQTLSPAKPSSQFPTISFTSSSPLATLQSLTVQVAQVNTPPGAQDKQQHQEPKDEFYVNLGLAVRTLREELPMIFIKDLNYDIYRDDITFMDPLNTFTGIEKYKLIFWALRFHGKILFREIALDVYRVWQPSENVILIRWNLRGVPRVPWETQGEFQGTSRYKLDRNGKIYEHRVDNLAFNFPQNIKPVSVLDLVTACPASPNPTFLWGPVDAYSSSWITFYQAVRKTLDQEGRLLPQDGLATCS*
>comp42013_c0_seq2
MRAYIWPRTPYHTLTAPAPATPAEHLLRLSTIHDSRLVPGPVPTPRTQMQHPGTISVNHAAVSSFSAFWSISYQRNVSTNPCAHANG*
>comp32126_c0_seq1
MYKQFEWSYLRVLIALCLQPLMQMQCINLEIFSLKDPFRQEDIIGCPCSYEF*
>comp45096_c0_seq1
MIIVHVCRCRTTLGIQCSNGFWSLLHWLGLLCLYSFYMVADKIHCKM
>comp65956_c0_seq1
MDYSCELDRNDIIGKGDFKQGSHYMYSNPNKTRHHLLHKDKQDLFGLSKPFILCTTLRLHKGT*
>comp59218_c0_seq11
MAKSSADDGELRRACEAAIEGTKQKIVMSIRVAKSQGIWGKSAKLGRQMAKPRVLALSTKSKGQRTKAFLRVLKYSTGGVLEPAKLYKLKHLSKVEVITNDPSGCTFTLGFDNLRSQSVAPPQWTMRNIDDRNRLLFCILNICKDILGRLPKVVGIDVVEMALWAKENTPSVSTQNNLQDGGPVASAVTETELKVNVEKELVSQAEEEDMEALLGTYVMGVGEAEVFSERLKRELQALEAANVHAILESEPLIDEVLQGLEAATNCVEDMDEWLGMFNVKLRHMREDIESIETRNNKLEMQSVNNKSLIEELDKLLERLRVPSEYAACLTGGSFDEARMLQNVEACEWLTGALRGLEVPNIDPVYANMRAVKEKRAELEKLKSTFVRRASEFLRSYFASLVDFMISDKSYFSQRGQLKRPDHADLRYKCRTYARLLQHLKSLDKNCLGPLRKAYCSSLNLLLRREAREFANELRASTKASRNPTVWLEGSTGSGQNVNATDTSTVSDAYAKMLTIFIPLLVDESSFFAHFMCFEVPTLVPPGGVVNGNKTGYDDDDANDDDLGIMDIDENDGKSGKNSAELAALNESLQDLLDGIQEDFYAVVDWAYKIDPLRCISMHGITERYLSGQKADAAGFVRLLLGDLESRISMQFSRFVDEACHQIERNERNVRQMGVLSYIPRFATLATRMEQYIQGQSRDLVDQAYTKFVSIMFVTLEKIAQTDPKYADIFLLENYAAFQNSLYDLANIVPTLAKFYHQASEAYEQACTRHISMIIYYQFERLFQFARRIEDLMFTVAPEEIPFQLGLSKMDLRKMLKSSLSGVDKSIAAMYKKLQKNLTSEELLPSLWDKCKKEFLDKYESFAQLVAKIYPTETIPSVAEMRDLLASM*
>comp165287_c0_seq1
MNIQGPDCLTAVKSVTKCITILSPVKNRQHSLDQENYKSDNMKNDSG*
>comp27562_c0_seq1
MLRPCTSHEWHDLFCLILAKISCWHLVQKQLFPWLYF*
>comp18466_c0_seq2
MLERAFDGLGYKGGASHGSDNSYLFNALYLKPIKDFPELMSMAETMTDIWMKFIAEDPVSGWSSVKSGLPKITFLDVKSSNPSENKWKTEETVGQQFWNSLNLPQPNSKTTQNDQHSEL*
>comp41995_c0_seq1
MALEWVVLGYAAAAEAIMVLLLTIPGLDGLRKGLIAVTRNMLKPFLSVVPFCLFLLMDIYWKYETRPSCEGDSCTPTEHLRHQKSIMKSQRNALLIAAALLFYWLLYSVTNLVVRIEQLNQRVDRLKSRD*
>comp231459_c0_seq1
MSSDKSSSNYTISWVTRTCGGHSSQEGSTIISSPIEGGLYPSNYDCVWQIDYPEETTIRIQFNSLDLDMTGSTVNDCSSDYLAIHNGGSPSSPMISKSCG
>comp41357_c0_seq1
MCEIIFLYLILALLSCFVFSLLHLC*
>comp314253_c0_seq1
MKHRRLLIINPINIQHLVPRFHNKYHWLVTWEVYVCACPPYLHKCFRMLSLYYFLSFKNTFSDT
>comp50083_c0_seq1
MARKFQEALALATVALCIGVSSGKHSTQPEQVHLSFGANEAELFITWVTQSPTAASSVVQYGVTNTNELSAVGDSTKFVDGGWKGRKIYIHRVKLEGLKPNTTYVYRCGGEEGWSNVFWFKTIPSGTKWSPRLNVYGDMGSENAVSVPRIQKDAQSHAIDAVIHVGDFAYDLHDKNGKVGDRFMNMIEPIAAHVPYMVCPGNHEKAYNFSHYRNRFTMPGNSENLFFSFNMGPVHIISINTEAYWYLQYGMKLVVNQYNWLIKDLEEANKNRAERPWIVLYGHRPMYCSGVSKECVEDAPTRSGLNGKLFGLEELLWKYGVDLTFWGHQHNYERLWPVYNYTVLDGTKSPYVNPKAPVHIITGSAGCKEDIEPFGTPAPYSADRNLHYGVTEVHFLNASHAILTQVATDIGGQVVDQIVLVKNEHGPYTQL*
>comp42879_c0_seq1
MNPEDNFIISQLFLASLNVLYLISTGLSNQGGFFFSFWFEFSIAPLSLTPHVGKIENTH*
>comp154806_c0_seq1
MLVFSGLSIYTRHSLWDKMVFMTSLWSSPQGFFLLMICEVTGQLSCILSYFGSLFSFLFSFYLGGFLILLQRYLLSFPSNNIFFFYKKMHGNVPF*
>comp27207_c1_seq1
MEGLIPFVYKAIVQYKNNKEGPIGSWICESPSYSYMRLPGDSGRFQTSASFSVSSPSSKS
>comp24724_c0_seq1
MLRKTLLLFLFPRQGGVGWLCVD*
>comp49555_c1_seq1
MDKVYEELDEAKAEIEKLKAELRGKTDSFENLKKSHNAQVNQIQEAKFKVEKLDQELLQKVDEITEAKHMYEDLKGTLNKKESIIKHLS
>comp288675_c0_seq1
KVYRGYIEILYLEHFTYPFLPPLIIQTQGRELFSIPCLPFPFYPIPFHSISFPLKTSKHSPREHHNG*
>comp57424_c0_seq1
MMSAASIHRVSECFIKPQHPTKELNQICHLTPWDLLMLSAHYIQKGLLFRKPEKDNREDFMETLLDKLKHSLSLALLHFYPLAGRLVTHKTQDPPSYTVFVDCSKGSGARFVYATLDMTISDILSPLDVPSIVQSLFDHNRAVNHDGHTMPLLSIQVTELTNGVFVGCSMNHSVGDGTSYWNFFNTWCEIFQAQGHDTDIPISHKPIHNRWFPEGFGPLINLPFKHHDEFISRFESPKLRERIFNFSAESIAKLKAKANIESNTTKISSFQSLSALVWRSITRARHLPCGQRTSCRLATNNRTRMEPPLPQQYFGNSTQVLSAATTAGELLDHDLGWAAWKLHLAVANHDDRVVQESLKEWLQSPVVYQIGKYFDPYSVMMSSSPRFNMYGNEFGMGKAVAVRSGYANKFDGKVTSYPGYEGGGSIDLEICLTPDVMRALESDEEFMNAVSVSNSMY*
>comp53238_c0_seq2
MLYKSSSVKSLKMVMANFLTVFFVMEVIVSGFRFGADGLNMNYYLMSCPFIEPVVKNIVNRALQDDPTLAAGLVRMHFHDCFIEGCDGSVLIDSTKDNTAEKDSPANLSLRGYEVIDYIKEELEKQCPGVVSCADILAMAARDAVFFAGGPVYDIPKGRKDGTRSKIEDTFNLPSPTFNASELIRMFGQHGFSAQEMVALSGAHTLGVARCGSFKNRLTQVDPTLDSEFAKTLSKTCSAGDNAEQTFDATRNDFDNLYFNALVTSNGVLTSDQTLFTSPKTRNIVNSYALNEAMFFLDFQQAMVKMSLLDVKQGSKGEVRENCRKIN*
>comp606727_c0_seq1
MADSYSEKKRRETRQQRTNESGFKSTVVKSKVTN*
>comp189944_c0_seq1
MRLWWLSLAQAFLLLQKLKYFCFLDEYFKKSLFLLLA*
>comp50895_c2_seq1
MVSSDESADHNVSSEKLQQIVSPHSDITVSEETRDIKIHSSKPEGARSIPSVVAKNEVKDSDATACALQSDQEGITYSLPLEKHFQSSDTRSCSLQSGQDSPSIIREKVSKDGYNWRKYGQKHVKGNEFIRSYYKCTHPNCQAKKQLEQSNNGQITDSICIGQHNHPVPQLNTTQPVDFVLPVVEERPGKPSLANVEDKAPIEHGCVPQQIKPLDTPPISKVSPSDEVKVAHLQLTRANDEVHNNEDPEPKRLKKDNSNADVIGVDKSTRESRVVVQTSTEVDFVNDGYRWRKYGQKLVKGNPNPRSYYRCSNPGCPVKKHVERASHDSKIVITTYEGQHDHEIPPGRTVTHNAATNTHTMATNGKPGTKSGGNTVCVDTGEHSCLDSESRLNEQLNGESITKSKAGDMDEFRVISLHSEGPESKLSEQEQQNGNSGTKKDSVSIDITCHSSSEVPCRSNEQLKDEVNTKLEGSKDCLHVVAVHDTPGTKSKFNKQSTPDSEPVQS*
>comp4446_c0_seq1
MLVQLHCFSDYFCFERVFYSVLISLSLLNFCPNTWAYNANNLDYQKVFVSSGFYLG*
>comp51785_c0_seq1
MSESVALFHVPNF*QHQITPTTAPCSLYHKNQYHTHPTRKFPFFPIREGKSESVVLFQLLQQDDIFVFLHQCLKISHTRRFPCPTFSLCLWLQCRSLSSFTSIALFGLKNVGFEVSGDLRILSLQVFSSCVFF*IALVVAMQLGFLQNGLDLSPGQSVDGSFRKSSSVISASSVSGASGLSKFIPISRRALKGLKDYGRKLVDLDLFTQHLEDWVLENLNGDSADGKQCFSSPFTTDELRKLDLALEGVPFQQLVRMPIFSDISNELLEDQYLAAEDFLHAIIIGLWRTFWHKSGPLPLCVSCPSHLGSKFYSVEKAISRGRLREMRGLALISKTGTDLKFKWDQVVEFALFKPEVFLDNELRVSAQTICEALFYGFHVLVSRSLSKISSVNSDSVFLLVLDSKCGAVMKFSGDLGKLDLLNSSNPYLSVAEWIKTYAEIGVTKVEPIWNRLGNANWGDIGTLQVLLATFYSIAQWNGPPRKSVASLIADHSLRLQKRRTECCIIETENALVPYQGAANHEAGEIVELDQSELFSKTRASRLKLKHSDKLVLDDPQQGQKSFQIHESLVGGNYYLYSAVCLDHPSELLTLYVGAHPSRLEPSWEDMSLWYQVQRQTKVLNILRNQGILSKYLPEIVASGRILHSGPCKKESPGGRCDHPWCGTPILVTSPVGEPLSSVVANEGPFSADEAIRLCRDCLVALRSAAVANVLHGDICPENIICVVEKQGVRNQVIYVPISWGRAVLEDRDSPAINLQFSSSHALQHGKLCPSSDAESIVYLLYFICGGTMRQQDSIESALQWRERSWEKRLIQQHLGQISALLKAFADYVDSLCGTPYPVDYDIWLKRLNKAVEGSADKGKMIEEVAITLRLEDAAESSGASGP*
>comp43621_c0_seq1
MLNLIFSYTIRRFSFRFYEGHELETVWTLVPFFLLSFILIPSLGSLYMLDTCLFCGMTVSIIGHQWYWSYFYKDSASNSFDSYILPSEARKVRLLDVDNRLIIPSFIPIRFLVSSSDVLHS*
>comp618887_c0_seq1
ME*NYFLFLKAAFIGTTLE*I*TIPIFQNVYIHLSCPCLFSLFFFSFSLNRSHAAFFPLM*
>comp280817_c0_seq1
MSSFCTSSLIKRSL*
>comp109277_c0_seq1
QNWEEEWPKKGQGSRGKQLINRDNNNHQRRNCVKDKRKTELKN*
>comp58053_c1_seq5
MDVETFYDGYLAAIMVDEGGVAAVGSPIALLAETEDEIALARSKAADSSSSSSFSASPESKPEKNADNVGPGSAAKAPATTTHPASEEGKRIVASPYAKKVAKELKVELGRVVGTGPMGRIVAKDVETAAVDGVSSAKGVDDGVAGPGLRKSVGIELGTVVPFTTMQVAVSRNMVESLAVPTFRVGYTITVDALDALYKKIKSKGVTMTALLAKATALALVKHPVINSSCRDGKSFTYNSNINIAVAVAIDGGLITPVLQDADKVDIYSLSRKWKELVDKARTKQLQPHEYNTGTFTLSNLGMFGVDRFDAILPPGTGAIMAVGASQPTVVATKDGRIGMKNQMQVNVTADHRVIYGADLASFLQTLSKIIEDPKDLTF*
>comp48335_c0_seq1
MELEDQEEQEEELCMAATAGYDSLGNPLSRVKMQGAGEAMTVAQPMRNNSNKARYRECLKNHAVSIGGHALDGCGEFMAAGTEGTLDALKCAACNCHRNFHRKETDTIGVGVGDPYLLTQHPHPHPHHHHHHQPAQFAAYYRTPAGYLHVAGQQRVGTLALPSTSGAGGGGCGTQSTRDDQEDVSNPSAGGGGGSKKRLRTKFTQEQKDKMLGLAETLGWRIQKHDDAVVQEFCNETGVKRNVLKVWMHNNKHTLGKKP*
>comp32845_c0_seq1
MKLEATKFRPREVVKHVLQTAAASLQKILTLEGNVADDVPIEVIGDVLRIRQILTNLISNAIKFTHEGKVGINLYVLPEPLFAKAEEGLQKTTADQLTISANG
>comp44173_c0_seq1
MALVSGGRSTLNPNAPLYIPAAFRQVEDFSPEWWQLVTTLTWYHDYWLSQQHDEGGFYDNSSEDGFDTNGVVDLLPDTFDLDAGDDLSTLEAQLEEFIRSSETQEETGPYTFLEPGHGAKA*
>comp2407_c0_seq1
MGQCISSFEIVRKVDASDTSELKNNSGEIVTITGNRKPKCFGFVNLEDIDDALIFFLINLEDKIILKG*
>comp39944_c0_seq1
MKGKFQSQFSNPCNCKKLY*LKCQTS*HS*VCFNIKYVLGEPR*IAISVLNK*SLV*T*NANNYDIKANLVISTMETSALTRI*
>comp10679_c0_seq1
MLCLMRIYVMLIRGKTVNESEKNCCSCTVFFTIQVQL*
>comp307426_c0_seq1
MHSIRRPYRYLNILLEFGQERKRCASGRRGRKIKQNKIQATVIVKCISQVCKDD*LERSSINICSRS*DCFLIFFHS
>comp4830_c0_seq1
MAAIRKKLVIVGDGACGKTCLLIVFSKDQFPEVYVPTVFENYVADIEVDGKQVELALWDTAGQEDYDRLRPLSYPDTDVILMSFSIDSPDSLENIPEKWTPEVKHFCPNVPIILVGNKKDLRNDPNTIRELAKMKQEPVKPEEGRAMADKINAFDYLECSAKTKDGVRQVFETATRAALQVKKKKSKTKCCLL*
>comp31953_c1_seq1
MIEPHDEPVLKHLIDVEVECLGNESMGFVLKFVFSSNEYFKNPVLTKYYEMRCKPDEDDPFSFEGPEIIKCKGCTIDWYKNKNVTKKIVMKRQKHKTQGTVRTVTKSLKNDSFFNFFDPPQVPDDDTEDVDAEIQ
>comp164419_c0_seq1
MQQKFWNLCKR*SSYKVHKSTTL*RRKHQRLVEILFISIHTEKLQLYF**KESSYCSDKRI*PILGLLI*AFFSSPPLSVYGGSISMAC*
>comp165138_c0_seq1
MLPPTLPLGPGQLSRSRLNHLSLPPKRQCLPFPPSTSTQTCFIEFKCPTRLPCYTN*
>comp59424_c0_seq5
MRRTIGIRLQTTNISNATRQTLVPFSTSSSSGSGSGSGRGRGSSLSGLGPFDSNERAPGKPNSSESKSDSPESPIPPGSGRGHGRGKPLPPTSGLPSFSSFMSSIKQPPAGRGRVTGPVASQPEHDSLPPDSGPKKPIFFKREDGFSLTASDDSSPPKKPMFLKREDVVSPTARTSDHEIDHSLPGSIVGVLSGLGRGKPMKQPEQEPEPEAQFKEQNRHLRTRRAPGAAVSETVPERQPIPSQDDAVKNARKFLSQGGIDESGTGRGRGPRERGELGRGQGRGRGRGRGRGRGQGTGRFRMREGEQRGGGRIQDAEDSYAAGLYTGDDADGEKLAKKLGPEMMNQLVEGFEEIAGRVLPSPLEDEYLDALDINCAIEFEPEYLMGEFDRNPDIDEKEPIPLRDALEKMKPFLMAYEGIQSQEEWEEIMEETMERVPLLKKIVDHYSGPDRVTAKKQQEELERVAKTLPESASSSVKQFTNRAVISLQSNPGWGFDKKYQFMDKLVWEVSHHYK*
>comp18746_c0_seq1
LNSCVGLLIENILVNESYLKKKHIGSRANP*
>comp39118_c0_seq1
MRLTSPAILLLCDLLLVCHPSFTVKSELDPPLPETNATAAGNASLPRSNEDDSFANMIDRALQREFPENEQNE
>comp58706_c0_seq4
MARKGNQQKNGLERHGLNHKKGVSGGVLPGTKGHAKEGPVKVFPGEELTNGDQPSGLSQNANETTTSGDDNNNEQKSEKFSGKEKQGMVAKHDLEESLSLGSDSEDGSLNSEVPIQEENGTLPRSDQGQQSIKSRFSCLRNGLHVKSVVEKVELADNMIVRRLRLSLFSIFTAVTEWLTRQKPLFVSLTTIVFKARDNLRMKIEQAYPVVLKWLMHFGNIVLLLSVFWLDCALRGIDSFVRMGTTSFFSVIWCSIFSVISMIGILKFLVVLGLAALVGLFVGLTLAILVVAILGIVSLLFYGSFWTTTFFIVLGGLAFMLSHERVALLITTVYSVYCAWLYVGWLGLLLALNLAFISSDVLIYFLKKNIDQQSRSNPSFEQRAGMQGQPGFFNDEPMQASSFENGPGPSADRNAGVPSTSGADSDVTSEDEVVRLLNCSDHYSALGLTRYQNIDVSILKREYRKKAMLVHPDKNMGNEKAAEAFKKLQNAYEVLMDSLKRKAYDDELRREELLSVFRRFHNASHKNGKHGFFPSGFARSDADSEDPSGDSRQIACKKCGGFHVWIQTKRQKSRARWCQDCQDFHQAKDGDGWVEQSFQPFLFGLLRKVDTPSAFVCADSRIYNATEWYICQGMRCPANTHKPSFHVNPNLTSKHSSGKGTNSGQRGGRMPTPNMEETMTEEEFVEWLQNAAQAGMFDNFSGSTATESPSTKAGNGTKNSGSSSSSGSKRKKKGKKQW*
>comp297791_c0_seq1
MGSGCLSGFSLEFCSELFRGVAISNMRLFYIVGADGKPISHYSAGYKIIPGKV*
>comp44963_c0_seq1
MFPLGIACSLSFKPEFTVSILLCFCIFPKYGCTLY*
>comp56564_c1_seq1
MISEFHKIPSISRIQKTKPQQLIAYNMKIPKVTTTTTEIQHKNPNPILKQNLQIKIEQDPQNTDTPNPTHPMSPQKQWAETFHSILFIQRALVGQSLAKCPDSPQL*
>comp47833_c0_seq5
MGIYLSTPKTEKASEDGENDRLRYGLSSMQGWRASMEDAHAAHPDFDKSTSFFGVYDGHGGKAVSKFCAKYLHLQVLKHEAYLAGDLGTSLQKSFLRMDEMMRGQRGWRELAVLGDKIEKLSGMLEGFIWSPKSGEANDHVNDWAFEEGPHSDFAGPNSGSTACVAVIRGNKLVVANAGDSRCVLSRKGQAHNLSKDHKPDLEVEKDRILKAGGFIQVGRVNGSLNLARAIGDTEFKQNKYLPAEKQIVTADPDITSVELCEDDEFLVIACDGIWDCMSSQQLVDFIHGQLKTENKLSVVCEKVFDRCLAPTAGGEGCDNMTMILIQLKNPSNPGASVTDQSLSSAQPSEADKSSEKIESK*
>comp357939_c0_seq1
MLLKYNDFIIFPAYKKTSLFLLLTKRPHRILCLLKKISILPTLTNNIKKLHHRIAVKQQDMFKS*
>comp57753_c0_seq3
MAVTGSVSGQPQFIASTGGNSSFSNAPLIEKSDTVQIVVPDRRSWKNLFAYMGPGFLVSIAYIDPGNFETDLQAGAQYKYELLWIILVASCAALIIQSLAANLGVVTGKHLAEHCRTEYSRVPNFILWVIAEIAIVACDIPEVIGTAFALNMLFNIPVWIGVLLTGFSTLILLALQQYGVRKLEFLIAFLVFTIAACFLAELGYAKPDAKEVLKGLFVPQLKGSGATGLAISLLGAMVMPHNLFLHSALVLSRKIPRSVRGIKEACRFYMIESAFALMVAFLINISVISVSGSVCDSSNLNAEDEMSCQDLDLNKASFLLRNVLGKWSSKLFAIALLASGQSSTITGTYAGQYVMQGFLDLRLEPWIRNMLTRCLAIVPSLIVALIGGSAGAGKLIIIASMILSFELPFALIPLLKFTSSKTKMGAHVNSVTISVVTWIIGSLIMAINIYYLLTSFVKLLLRSHIKVVAKVFLGILGFSGVAIYLAGIAYLVFRKNKEATHLLALTTPECQQMENEQGNGSIYCLPREDIVSMQLPQRSSPAEFD*
>comp52068_c0_seq3
MASTRKITLKSSDGEAFEVDEAVALESQTIKHMIEDDCADSGIPLPNVTSKILAKVIEYCKKHVESANPEEKASEDDLKIWDADFVKVDQATLFDLILAANYLNIKSLLDLTCQTVADMIKGKTPEEIRKTFNIKNDFTPEEEEEVRRENQWAFE*
>comp48557_c0_seq1
MIPPRVTLSLDLLLSLLRPFLCPHHTFFLISNSNRNVLSSLVSRVPISLHLSIILVPGKMSSREENVYMAKLAEQGERYEEMVEFMEKVAKTVDVEELSVEERNLLSVAYKNVIGARRASWRIISSIEQKEESRGNEEHVALIKEYRAKIESELSSICDGILSLLESHLVPSASSPESKLFYLKMKGDYHRYLAEFKIGAERKDAAENTLLAYKSAQDIALAELAPTHPIRLGLALNFSVFYYEILNSPDRACNLAKQAFDEAISELDTLGEESYKDSTLIMQLLRDNLTLWTSDITDDAGDEIKETKQQSGEGQ*
>comp38717_c0_seq1
MHDVIHEVASSIASKVQPFFALPYFAKLTEWPKMDMLQKYHFIFLSWCHM
>comp53118_c1_seq3
MHCCTSSMSMVRRFCCLHSANSIALSSNKKPLVFLGSPQVSTIVLDALLNASTAPDSLFEVAAIVTQPPARRDRGKKVMPSPLANYALHRGFSSDFIFTPQRPGEDTFLSTLKALQPELCITAAYGNILPSKFLDIPSLVNIHPSLLPMYRGAAPVQRALQDGVKETGVSLAFTVRALDAGPIIASETIEVDNQIKAPDLLELLFSKGSKLLIGKLPSIFDGSARVKAQPQDHSMATLAPKISPEESWLLFDQEALVLHNKVRAFSGWPGTRAKVLVVETNGQQNTLEIKIITTRVRNHKSLLSNEADDIRFSEGALVFPCGRDTTLEVLEVQLPGKKVVSASAFWNGLRGQKLKKL*EVVYQTESDILHYVWAV*AIESFSFN*FKFLFSS
>comp38295_c0_seq1
MCLPNINMHRCCIHMCTVLLTALFPLVFKWLHGIVCAGAKWRFTRLGG
>comp37191_c0_seq1
MTCLTLLLMFHALCSFFFFICKGEGITSYVRIIWLFLLIICVERSYCCFDIIEHFF*
>comp30747_c0_seq1
MQMESNKVSLPQLQVVFYKRI
>comp211226_c0_seq1
MWHPVSVVLLLLVTAACGDVCVRKNAVVETAILEPMRQILSSYSVVAVRSVNRSFRFVSVSGEDGQIGNLTSFELIPTDDASRICHSADGTNTTFVAT
>comp14589_c0_seq1
MTPVGKGHRSLNLALRKEFNLYANVRPCRSLAGYKTLYDNVDVVTVRENTEGEYSGIEHEIVDGVVQSIKLITEDASRRVADFAFKFAKEAGRKKVTAVHKANIMRMSDGLFLRCCRDAAKAFPEIKFEEKYLDTVCLSMVQDPNKFDVLVMPNLYGDILSDMCAGLVGGLGLTPSGNIGVSGALFESVHGTAPDIAGKDLANPTALLLSAVMMLRHMELNNHADKIEAAALEVIKEGTWRTGDLGGKAKCSEYTDAICQKL*
>comp276265_c0_seq1
MTSEYHQFDWHAPPQPHLGCCLCGCRSSRSEVE*
>comp25993_c0_seq1
MLMWGIVHVMRISNIRYQLYLTIPCYASGMILLCFTAFGS*
>comp143864_c0_seq1
KQLGSIYPPNPCTAPYIFVVVVNCTKPNHTANKSLVCLLFFNWFTWSSSDF*
>comp56717_c0_seq2
MDLAFQRTRSIFFAASLLILLSSIVFTAFASIHIYDHQPFKEVGNAYLLSGGSEGVVASLTAAPPPPETTSIHDGRSYIRFENLTFWRSNAAAIEHSEMEHSTGLIQVIIFEAADRNNIGGSAYGGQRAICCTPDLAKMEGCKQGKVIRRPSATDINWPVILDVHFRGNYLTTSLDSKKVAITKTGMYNLFFVACDPKLKGIVMSGKTIWKNPDGYLPGRMAPSKKFYVFMALAYVCLSIIWFLQYVRFWNDVLQLQHCIAAVIALGLFEMILWYFEYVNFNNTGMRPVVLTTWVVTVGAIRKTISRLLILCVSMGYGVVRPTLGGLTSKVLLLGITYFLASELLDITEYVGTINDVSGRARLLLVLPDAFLDAFLILWIFTSLSRTLEQLQAKRSSVKLDIYRKFSNALAVTVISSVAWIGYEVYFKATDPFNERWQSAWIITAFWDILAFALLCVICYLWAPSQSSQRYAYSEEVGEESDDEEAESLTKGKQEGQVELSLVKQEKNVGSDASFDQEDESEEDKRE*
>comp299823_c0_seq1
MQEFLPGNSRWSARTIPSPLSYSFSHFHLASSMLFWSSLQSIVRRERKATATV*
>comp252424_c0_seq1
MEIRKNFVCLSSPKSSQNFENKGSNNSVKSRPVYRL*
>comp106801_c0_seq1
MITGGKSLKKIHETLCDDCKPIKTTYFIMIFACVQYVLSHLPSFNSIAGVSLAAAVMSLSYSTIAWIASVHRGVQPDVRYGNRASTPAGNVFGFFSALGDIAFGYAGHNVVLEIQATIPSTPEKPSKVAMWKGMVVAYIVVALCYFPVSIFGYWIFGNSVDDNILLSLEKPRWLIAAANIFVVVHVTGSYQVFAVPVFDMLESFMVKRMKFKPNWFLRFLTRNFYVSLTMFLAITFPFFGGLLGFFGGFVFAPTTYFLPCIMWLVIYKPKRFSLSWFANWFCIIVGVLFMILAPIGALRQIILQAKGYKFYS*
>comp46510_c0_seq1
MSFGGCAELSRCLAGASARPISCKLSHCTRSSISDRFLPLHRPIAGCSRVLSVSRDCVVAGAGSNSQGLTYKDAGVDIDAGSELVRRIAKMAPGIGGFGGLFPLGDSFLVAGTDGVGTKVILAFETGIHDTIGIDLVAMSVNDIVTSGAKPLFFLDYFATGHLDVDIAEKVIKGIVDGCQQSDCVLLGGETAEMPGLYKEGEYDLSGCAVGIVKKDSVINGKNIVPGDVLIGLPSSGVHSNGFSLVRSVLAQSGLSLKDQLPGGDVTIAEALMAPTVIYVKQVLDLVSKGGVKGIAHITGGGFTENIPRVFPEGLGALIYKDSWELPTVFKWLQEAGKIEDSEMRRTFNMGIGMVLVVSPETSNRILEDRDEIKKVYRIGEVISSKGMIYN*
>comp258922_c0_seq1
MAVVMAMVLLYIPMNYPTQLLELLIIVILSAFFAWFSTMSLPIINLIHPDTDNLY*
>comp101102_c0_seq1
MVRRMEMTNMFRSSLSLLSSKYAIYVYIKLYFQSLQQENKEKAGDDVR*
>comp53812_c0_seq2
MMSRCNGKFVQSTQIIEMIAKSKKKNRQRFLPPWTAPSRFDFLFFLFTVLLINNLFINHQ*
>comp959_c0_seq1
MGINASLVSHFCSEFGLLTCSANCISHFFKWSIYQKHIHSCHMMGYGHLSLKLGILKWEVSISVSNETH*
>comp246193_c0_seq1
MYGTMNF*TFISFSAHGATKQTKNFR*KSCSFTLLSHFSVSV*LEYFFLASLPSLLSVWISFLYVYF
>comp41258_c0_seq1
MVKVCSLTSPLTPSPNQFSLLFLLHPKLLSCRSTHPFSPVSSPPDPMPACIDASRAGLSRKPNG
>comp16790_c0_seq1
MSQAYGQQLSQSYKLSSYLYRLGDMVETITTGYSMHV*
>comp26611_c0_seq1
SRNSEYTYVERLKSIYDQLHQKQKLRCPLHRDKWIQTSTCTCFRHTKRRAWIYTHGETETERGRISFIQEFSNRNTIVFTKDQWYYQHTLVKQYI*
>comp510675_c0_seq1
MTHEAVLGKLFNGADLMLPGVIFSSEFSGDTSVIKKGGAAAVCTDKNLACVAVGQSVISGQDIASGVKVGRAVKILHTFGDELQKLLDEVPKLPIIHHQIQILPDVLG
>comp232412_c0_seq1
MIILSINTSGEGKEVLLDAMLGVCGVFWFLFGWEFIVFLASFSLTLLLTFSLRSFSSCYHVQV*
>comp114316_c0_seq1
MTTLIRPGGKKLINSAGVILFKSKVVKNCIARSDKTRCSLKQVISLIRKNPHVIYKLKQMCETQSLSSIRLAKFMITGKRQCCINRNKFCLIAKIQNPLKNYQILSMG*
>comp25945_c0_seq1
MLAQWEQLAVMCFLPGVHDKSIAPWSQILTGSGTLTLKEVYPRHLWVACELSKSHPMASTKSSALVGSNFKVGSSCGGRGGTCDGRSGG*
>comp484047_c0_seq1
METSQVDLEGMLGECECPFNWNLQEFEKSFESPTLRVDDFIRSYNEYGPRREHPRFWVCLYLSYFMYRERMSGWDKFLESAFRIMEKYRGTEYPEALERLPNYDANVYS
>comp62045_c0_seq1
HWLNLEDTLPRVKVKKPRKECLSRAIPTKS*
>comp59597_c2_seq1
MHWKLKGQPTTRDSHYCRVWGGLDVCSVTPVSREAISTTTTHDLQVTRQQPYCCAKVHPLYICS*
>comp55060_c5_seq1
MARTKQTARKSTGGKAPRKQLATKAARKSAPTTGGVKKPHRYRPGTVALR
>comp42293_c0_seq1
MPFTWTSALRITLLLLLIAAIVAACFTLPVEKILKDFLKWVDRDLGPWGPLVLAV
>comp295386_c0_seq1
MAAAAHHLNIISHNPRVSGGAMKYCNLVFSCNCNVKVQEKFLLTYLIRMQFCTAMELAHLKTL*
>comp50521_c1_seq1
MGFPVGYGEVLFPNLFLHALSLLGFVRNLVFSLFRFLGLSDFVETEVAWPESEPQMPDNPTLSVLLIREFLPVVKFAELPPPAAAAAEESCAVCLYEFSEEEEIRCLANCKHIFHRGCVDRWMDHDQKTCPLCRTPFVPDHLIDEYNQRLWAASGVNEFYCDYT*
>comp49411_c0_seq1
MIIITMTKKPWRSGPREIIGTTNRIVRGDDKIPVLELLDEISTPNIVIGLKTALHKNPKPRSKAEQQSKQKQVWV*
>comp42309_c0_seq1
MVHVIQIFAETRSKNISDAEESNPNKICREMELQHSENKLSSYVNM*
>comp297764_c0_seq1
MSKTPLFFHIFPLQCLLLLTTTLPSQVISQFTTSTEQTILLNLKHQLSDPPSLQPWNSSSPPCDWPEIHCTGGSVTELLLPGKNITGKLPATICELKNLTKLDLSNNNILSEFPTFLYNCSNLQFLDLSQNYFTG
>comp55045_c0_seq2
MGWFDSLWGEEGRKFIKRKDSDAGEAGRALEELRASLYNELRTSEGAKRQQQRYCGPVVAMTFNFIVAVGIIMANKLVMGKVGFNFPIFLTFVHYITAWLLLAIFKALSVLPVSPPSKTTPFSSLFALGAVMAFASGLANTSLKYNSVGFYQMAKIAVTPTIVLAEFILFRKTISSKKVLALAVVSAGVAVATVTDLEFNLFGALIAIAWIIPSAINKILWSTLQQQGNWTALALMWKTTPITVFFLVALMPWIDPPGVLSFKWDVNNSTAVLVSALLGFLLQWSGALALGATSATTHVVLGQFKTCVILLVGYLIFSSDPGIVSIGGAIVALSGMSVYTSLNVQESQENMSKQLPKQIPPSLKPKSNSEDSTDPNVNTTTIVV*
>comp44267_c0_seq1
MNRIPLTLIIGICIGFVVGVGLAFSIFLCFRCGRKRTQVEKTCSRRAGTIPVRVKGVDSSTTLSDSNAGLESPRTSEWSNMPLWLEGLRRKNVISACGIPKYSYKDIQKATSNFTTIIGHGAFGPVYKAQMSTGETVAVKVLGTNSRQGEKEFLTEVLLLGRLHHKNLVGLVGYAVERGQHMLLYIYMSNGNLASHLYDLGENQEPLSWDARLCIALDVARGLEYLHYGAAPPVVHRDIKSSNILLDQFMRAKVTDFGLSRPEMIKPRLSNVRGTFGYLDPEYMSTRTFTNKSDVYSFGVLLFELITGRNPQQGLMEYVKLAAMQAEGKVGWEEIVDSQLNGNYDVHKLNDVASLAFKCVNEVSKSRPSMRDIVQALSQLRSKHSRNHSRTSPAALKEVSIEVDQLETQDFSSIECSKVLRRLHSR*
>comp57782_c2_seq1
ILNFTYQVGNVTLCHHLILLVLVKNFCVFHLSVSSCAFQCWYYFV*
>comp47384_c1_seq1
MSVERSFEAWEEVQRHGHDLADRLAQGFTGLIQTHMNPTHMKLFDLEFTSQSFGKRDFGLVSEDYGINGVSAIFDIGNRIGQAGAEFGASLNGLVQQFFRS
>comp57391_c0_seq3
MQTSQKRPNSAGIHLYHQPAQDIDPYPNYQILQSNSGHDIHDSSSQGTSVSFETRNEQYFTLESSPATTGLIGCDSPSYASVSSNRSPFSPQGSHSNYSDQHQSSDNTYGSPISGYSSTDDGYELKHKLRELEISLLGPESDIVDSCHCSFKGGLHEASPIAKYNWVQIAEMIPKLDLREVLMLCAQAVSDEDIQTAIGWMDNVLGKMVSVAGDPIQRLGAYTLEGLRARLESSGSQIYKTLKCEQPTSKDLMSYMHILYQICPYWKFAYISANVVIGEAMQNESRIHIIDFQIAQGTQWLLLIHALAGRPGGPPFIRVTGVDDSQSFHARGGGLHIVGKRLSDYAKSCGVPFEFHFAAMSGCEVELENLGVRPGEALAVNFPFVLHHMPDESVSTENHRDRLLRLVKSLSPKVVTLVEQESNTNTSPFLQRFVETLNYYTAMFESIDVARPRDDKQRISAEQHCVARDIVNMIACEGAERVERHELLGKWRLRFSMAGFTPCPLSSSATAAVRNLLKEFNENYRLEERDGALYLGWKTRALATSSAWRCY*
>comp51013_c1_seq4
MQPFRKPLFHHLLRFRITPNSPHRFPAPQSLHLHLHLHLQDTKFLCTSTPPDSDSTDPKTCLPIDAGSSNRKPISLWPGMYHSPATHALWEARSTIFENPVHGLSSPKTPSKSRTSIFYNFSSDHILREQYRNPWNHIRMGKLVEDFDALAGTIAFKHCCNEDGTTRPLILVTASVDKMVLKKPIHIDVDFTIVGAVTWVGRSSMEIQLELTQSAAQGHPNISDSLALGANFTFVARDSATGKAVPINQISPESEQERLLWEEAEQRNKLRKKERAEQKHGENGDTARLSALLTEGRIFSDMPALADRDSILMKDTCLENSFICQPQQRNI
>comp37541_c1_seq1
MDACMGIVNSQGFQNRKTSYRKEKSQTQFSNIATIHKLKA*
>comp59672_c0_seq2
MKLYQSAVTAAEDDGGVLEYELSVDAKLDYLVWLHFAEIESGVRGAGVRVFDVFINGRNLTRIDIYKQVGSFAALTWHHTVKNLSSSVLSVKLVGAVGAPLICGIENYALVPNDPSTVPQQVIAMKALKDSLRVPDRMGWNGDPCAPTNWDAWEGVTCRMSKDNTALVISQIDLGSQGLKGYISDQISLLSDLVSLNLSSNLLGGEIPSGLGQKSLIHVDLSNNQLTGSIPDGLASSSLQLVLLNGNLLEGRVPEELYSIGVHGGAIDLSGNKGLCGVPSLPACPVFWENGRLSTQGKIAIGFSCLFVFCVVLLLVYIYIRRRRNDYDFALPHELTSLAAKRNRYQRQKSLMLLEMESQHAKGLPSPFTQQQ*
>comp19091_c0_seq1
MGHKFGCTPENAMQLIDKAVKMGLRIVGIAFHVGTGCKEPEAFPRAIGLCAKIIKEAKMKGIHLNTVDVGGGFPENEPDTFAKMAELLKGALEEENDTFKGINMIAEPGRYFAGSTFKLYASIIGIRHNPDVTWYYINRGIIGAFNCVFSENLTRYPIPWKSRSDNLKPSLIWGPEEIQKDLLVKEILLPPLKDGDWLVFPTMGAYTVTLDPVNWLASSKPKVYYHVSKVDWDFVQEANGKSKEHLHLANFV*
>comp266311_c0_seq1
MSGKIENSLPLVQFNIFDEVSCLDKQGYLEHTHMLCKDHRQRMIVAYHTHTFEKDMEHISYQKDQLKLL*
>comp58517_c0_seq2
MARHPKPQVSSDEALSNSSSSSSSSEEEQVNEQINDEEDQEELEAVARSASSDDDEPAPADDNPSDSDEDPAAAEDGDEEEQDGSNIDPEISKRERARLKEMQKMKKQKIQEILDAQNASIDADMNNRGKGRLKYLLQQTELFAHFAKGDQSSSQKKSRGRGRHASKVTEEEEDEEYLKEEEDGLANTRLVTQPSCIQGKLRDYQLAGLNWLIRLYENGINGILADEMGLGKTLQTISLLGYLHEFRGIKGPHMVVAPKSTLGNWMNEIRRFCPTLRAIKFLGNPDERRHIREDLLVAGKFDVCVTSFEMAIKEKSALRRFSWRYIIIDEAHRIKNENSLLSKTMRLYNTNYRLLITGTPLQNNLHELWSLLNFLLPEIFSSAETFDEWFQISGDNDQQEVVQQLHKVLRPFLLRRLKSDVEKGLPPKKETILKVGMSQMQKQYYRALLQKDLEVVNAGGERKRLLNMAMQLRKCCNHPYLFQGAEPGPPYTTGDHLITNAGKMVLLDKLLPKLKERDSRVLIFSQMTRLLDILEDYLIFCGYQYCRIDGNTGGDDRDASIDAFNKPGSEKFVFLLSTRAGGLGINLATADVVILYDSDWNPQVDLQAQDRAHRIGQKKEVQVFRFCTEYTIEEKVIEKAYKKLALDALVIQQGRLAEQKTVNKDELLQMVRFGAEMVFSSKDSTITDEDIDRIIAKGEEATAELDAKMKKFTEDAIKFKMDDTAELYDFDDEKDENKFDFKKIVSENWIEPPKRERKRNYSESEYFKQTMRQGGPTKPKEPRIPRMPQLHDFQFFNTQRLNELYEKEVRYLMQTHQKNQIKDSIDVDEPEEVGDPLTAEELEEKERLLEEGFSSWSRRDFNTFIRACEKFGRNDIKSIASEMEGKTEEEVERYAKVFKERYKELNDYDRIIKNIERGEARISRKDEIMKAIGKKLDRYKNPWLELKIQYGQNKGKLYNEECDRFMICMVHKLGYGNWDELKAAFRTSPLFRFDWFVKSRTTQELARRCDTLIRLVEKENQEYDERERQARKEKKLAKSMTPSKRALARQTESPSSLKKRKQLTMDDYGKRRK*
>comp33338_c0_seq1
MPATEYQSSFLGRISTRRNQVMAMEGNHDEELEDLELFKKNVADRFSNLLSSSSKSESKDSSSSSDAMLSIAWLRKLLDVFLCCEAQFKALLIMGGDPSQISKPPLDRLIPELLDRVVKSLDICNAVFLGVESVKNMQRLAEIVVSALEQRPLGDGQVRRAKKALSSLATAMMLKDKDGSNTKGTERTRSFGRRGSSSAAANKERAPGNFRSLSCRMARNCSSAKQILAMSSNLVAPRSGESSGLALPVYMMSTILVFVMWT
>comp59997_c0_seq1
MVSVMPFINVLILSSKFTLTLSRFLLNVGQNNEGS
>comp45498_c0_seq1
MAQIKSGLWVNPRVPEMIGMPEHENLAKTSGKFWCTWQVDRGDRLPLGAPALMMSPQAVSPGLVRPELLHERDVKYNISSESLKSSRLEIPEPEIINPMADYWKQHGKGFAIDIEDTQMKLGPPFP*
>comp152036_c0_seq1
MSPTKQKIKSRKQSIDKYDNKKSTQSMSCITSILISMIPNQVFPYSSQEPARQNSTLAQTIQAFPRVSSPGHQPSKKVLRPQHQC*
>comp52869_c0_seq1
MEQEEHEQHEVYGADIPDDMDADTAEFDVSPRVDDEEQEQEQEQDHLGHGTNHPNKDLEDMKRRLKEIEEEAGALREMQAKVEKEMGTVQDSSGSSASQAEKEEVDSRSIYVGNVDYACTPEEVQQHFQSCGTVNRVTILTDKFGQPKGFAYVEFVEIDAVQNALLLNESELHGRQLKVSAKRTNIPGMKLYRGRRPPVGLRSRRPFMPSPFYPAYGYERVPRFRRPMRYRPY*
>comp30589_c0_seq1
MSNIGNVDVFKLRHELYIFCGILLNLCLDTKICKLFAWYWFFYRSLMLLIHLLLTQILLEVSLD
>comp17149_c0_seq1
MIQYADKKIKKKIQVQKNNEYIK*NIVGRPSTFQSSHLHFLLEVGSWIV*DCNRHLIDTLDQLLSFKLNYDTWFLHIHLWPFQPKAFPNFEMLLAVLGYL*
>comp135204_c0_seq1
MNRSQHQLDLISCLTVPGTQSQIKKSKAPHQTAYYHIRTTRNKCKIWHSLSTYLRLITKRIMLLFNKCRKN*
>comp28137_c0_seq1
MAATIPFSLLRNCSSLISARPFVVKAAPTHNFSNFHLLLPLQRRRLPFSTSAANNEEAAAKAAAVNFDSGAPTIFDKIISKEIPSSIVYEDEKVLAFRDINPQAPVHVLVIPKFRDGLTQLGKADGKHGEILGQLLYAAKIVAEKEGILDGFRVVINNGPSACQSVYHLHLHVLGGRQMNWPPG*
>comp10298_c0_seq1
MSIVNSENFFVRVLCYHLHGYKCM*
>comp529734_c0_seq1
NLQKPLIKDQINIITLKSFFKINQQSN*
>comp46621_c2_seq1
MYELFGGETHELWGITPKSRLPFYIRCLSNRKDPPMILLLWIKNKNNKKQEEEEHMAFPTKWKNNKKFQNKFMLESLSSLSTCMKNFRVGTIEF*
>comp49788_c0_seq1
PPAPPSPLSIHQNPLQGISLAHILSVPIDACKDSPPLLRRFTPCSLPSFDLAGEIKGVNVRE*
>comp295925_c0_seq1
MFKLLGDLTNVVEKLNSTPAIIGRTTAREKNVWLV*
>comp21134_c0_seq1
SAELSFILVSFPVKVVAVAEVRREFDSPEPFFLVTPNIFGFLEQEPFRSIS*
>comp233745_c0_seq1
MQCRSRTNLRTKLNCKNSNYCQQQTNKSPTLNFTDGLMNKDNCYQR*
>comp59074_c5_seq1
MILRFSNHEEDYFLNKNQRCPHISFETDLTSARNFLKDSNINEQKHSSLGGNNFYSIGTQLLKSIYLPSEC*
>comp41594_c0_seq1
MYRWILEPAERDALLVNIALRNANKNYHVIVEIACVLSPEELFVVRRAYHNRYKRSMEEDVAAN
>comp55250_c0_seq1
MSMATSPHTHHLLPQNPNHLLKNPTTHNNAFPITSLRTITSTTFKPISIKCTQTQTQTQDRPPAQTQSQDRVFNFAAGPATLPENVLRKAQSELYIWPGSGMSVMEMSHRGKDFLSIIHKAESDLRTLLDIPPEYAVLFLQGGATTQFAAVPLNLCKPGDSVDYVVTGSWSDKAFKEAQKFSKPNVIWSGKSEKYTKIPSFDDLVQNPDAGYLHICANETIHGVEYKDYPTPKNQNGILVADMSSNFCSKPVDVSKFGVIYAGAQKNVGPSGVTIVIIRKDLIGNAQDVTPVMLDYKIQAENESLYNTPPCYGIYMCGLVFEDLLEQGGLKEVEKNNKKKAEILYKAIDESNGFYRCPVEKSVRSLMNVPFTLEKSELEAEFIKEAAKEKMVQLKGHRSVGGMRASIYNAMPLAGVEKLVAFMKDFQARHA*
>comp36093_c0_seq1
MFDICGNNIGTSFFFFFCSQIFSACGMNLRNYLDLRLLSFYAFLVQFLRRKQGEKEANNRVYNFVRKEKNKA
>comp349536_c0_seq1
ENDENLAKVYCSQSTFVIILNKLIYFQFYLKFNCLKSQSYLLGCKYCLSKSSLW*
>comp46296_c0_seq1
MSDEEHHFDSQADAGASKTYPQQAGTIRKNGYIVIKARPCKVVEVSTSKTGKHGHAKCHFVAIDIFNGKKLEDIVPSSHNCDVPHVNRTDYQLIDISEDGFVSLLTENGNTKDDLRLPTDEALLAQIKDGFAEGKDLVVSVMSAMGEDQICALKDIGPKN*
>comp58069_c0_seq22
MSMKAAKARTRVGKYELGKTIGEGSFAKVKFARNVETGNHVAIKILDRNHVLRHKMMEQLKREISAMKLINHPNVIKIFEVMASKTKIYIVLELVDGGELFDKIATNGKLKEDEARSYFQQLINAVDYCHSRGVYHRDLKPENLLLDSSGVLKVSDFGLSTYSQKEDELLRTACGTPNYVAPEVLNDRGYVGSTSDIWSCGVILFVLMAGYLPFDEPSHMALFRKIGRAEFSCPSWFPPQAKKLLKRILEPNPLTRIKIPELLEDEWFKKGYKPASFTEEEDVNVDDVAAAFNDSKENLVMERKEKPVSMNAFELISRSQSFNLDSLFEKQTGHVKRETRFTSQHPANEIMSKIEEAAKPLGFNVHKRNYKMKLQGDKSGRKGQLSVATEVFEVAPSLHMVELRKTGGDTLEFHKFYKNFSSGLQDIVWHTEGKK*
>comp59782_c0_seq11
MAMAMDPTKKRKLDENGFAPPDSDLNLSPADARKLIDRFTPDQLLDILQDAAVRHPDVLSAVRSVADPDVSQRKLFIRGLGWDTTTDGLRTLFSAYGDLEEAVVILDKATGKSKGYGFVTFKHVDGALLALKEPSKRIDGRVTVTQLAAAGNSGSTANAVDVALRKIYVANVPPDLPADKLLAHFSLYGEIEEGPLGFDKQTGKSKGFALFVYKTAEGAQAALLDPVKTVEGRQLNCKLAITDGKQGKRGGGGGAPMGSDGVQGHGNAHGHGDGMGLGTGSSVPGSLAGQYGGPIGLGSYGGFSGGLQGQPPMGNHPLNSSVGGLSSVGNQAPSAVGGAGGYGSGLGGHYGGYGGPGSTGFGGAGAGGLGGSGGGLGGPGSLYRLPTSAGMPTGGYPESGHYSLSASSGYQNQHHPPAGASPVPRVPPGSMYPNVPPYY*
>comp53910_c0_seq3
MGNTSSMLTQYDIEEVHEHCKHAFTQQEIVSLYKRFCQLDRNRCGFIPVDEFLSVPEFAVNPLSQGLLRMLDGLNFKEFVAFLSPFSPRATLQHKIEFIFKVYDTDCNGKVTFNDMVNVLRDLTGQFVSEQQREEVLTHVLEEAGYKKDSLLVLSDFMKILGNSGLMMEVEVPVD*
>comp54681_c0_seq4
MGCFQFYVVLLLSISVGICSSSPVEDQKRDRITQLPGQPTNVGFAQYSGYVTVNEQAGRALFYWLIEAPASRGPGSRPLVLWLNGGPGCSSIAYGASEEIGPFRIRPDGESLYLNPYAWNNLANILFLDSPAGVGFSYSNKTSDLYTFGDQRTAEDAYTFLVNWFERFPQYKHREFYIAGESYAGHYVPQLAQIVYQKNKGIKNPVINFKGFMVGNAVTDDYHDYVGTFEYWWAHGLVSDSTYRMLRIACDFGSSQHPSVQCMQALKVAVVEQGNIDPYSIYTRPCNDTASLRRSLRGRYPWMSRAYDPCTERYSDLYFNHPEVQKALHANVTGISYSWKTCSDIVGNYWTDSPLSMLPIYQELINAGLRIWVYSGDTDAVVPVTATRYSIDALKLPTIINWYPWYDNGKVGGWSQVYKGLTLVTVRGAGHEVPLHRPRQAFVLFRSFLENKSMPLPS*
>comp293229_c0_seq1
MSRSTVLCMLSSAGDFVKRSEVPTSLNPALFATCFCPAAKPNLRAVQSTIATSGNRSGT*
>comp34387_c0_seq1
MTQHYTIIEKKKKKLQIYTCFYIQNIKDDDIEAVSSTHTKIQFLNHRLL*
>comp14609_c0_seq1
MDAALDAMRQFGFEEQLVRETVDELLDVYEGNQGWPFIEEASYKLLIETMLSNQQSSAKEKDNARRDGVTETSSAATPTTGITEVGSSSLVAQDYLLQTSDGLDSASQTNDQNSASLGNLETDVKDSTVPAERGGHGEGIRVESKNELKHADNVTGSNNSTLVRNVGSAFVRTPMIESSEPLENLPYRRRKPYYGWISSDDDVELICFPLPPLPEHVEKLIGQSAAPQSGRRRRRKSRWDEKPDDM*
>comp56637_c1_seq7
MALRFIAISAVSTVLSFVGLHFCTELSIDKLKSDGLIGWYLIHLDNANHDVELPLGLYTTIGLLANCMINVFVLLNLCLKAMFFTELYPSETRKLIERLINYVIYKGTFLPLIVPPTIYQAGLWSTWLTVLCSLKMFQALARDRLERLNASPSATPWTYLRVFSALLFVFVVDVFWIRLCLVTYRTHGSSMFLLLFFEPFSIAFETLQAILVHGFQLLDIWLHHSACNSSDCRRSRLFDTLTTGSLLEWKGILIRNLGFFLDMATFFMALGHYLHIWRLHGMAFHLIDAVLFLNIRALLSAIINRIKGFIRLRIALGALHAALPDATTEELRAYDDECAICREPMAKAKKLNCNHLFHLACLRSWLDQGLTEIYTCPTCRKPLFAGRPENETNSNTGEISSDEQLARQISAGLDQPDARHTMPAGLYPNQTPNSVEGVPWRGAGLDSGWLQSWPNQGVDGAGPSTATRTVGLGRVQMMMRHLASVGETYAQTSFEDAALSLWPINSSQASASGSVIPSPVGGFPAGTGSLRIRTASHSADDNVVNILAMVETVREVLPHIPDDIIFQDLQRTNSVSVTVNNLLQI*
>comp45757_c1_seq1
MGLR*SFIL*ISKKILTIKAFASILFI*SHCKRIPPLNK*VNIH*IQPQH*I*AIIKIQ*HKIRCLCKSKKLIKSTS*YSIIEKRV**SIKLLRVNQSFSCLIVFSLFERKSPRETTNPLLKLSLQE*HYITNLFQQFF*KVLTSNSASLNKIIEYQ**NLKLLIKIRR*N*FIIYIPSEL
>comp283285_c0_seq1
MQCIQTDLVNNCTGDSIFYKIRSMFLIFLRVLLL
>comp53359_c1_seq1
MAVPLSESEIHAATEKNSFRKCQLGEMNSRENKKKRNLGIWGIWNLNFDFFFPLIFCETNTRERWVRRRSVCRKRTTPQGASQCRGFSEVTLV
>comp55497_c1_seq1
MVNRSSRATLDLLIRSSKPFLDHRRNPSLLRFASGFDENCGQLQPNIVRGEQKVLSFCNPLRNFVKTKQWGVGIPSGIHHKCYGSMAGLVQRNPGFSKLNDEDVRYFEGILGDKNVIQNEDKLITANTDWMHKYKGSSKLLLQPRSTDQVSQILKYCNSRCLAVVPQGGNTGLVGGSVPVFDEVIVSLSSMNNIISFDKVSGILVCEAGCILENIISFLDNEGFIMPLDLGAKGSCQIGGNVSTNAGGLRLVRYGSLHGNVLGVEAVLANGTVLDMVKTLRKDNTGYDLKHLFIGSEGSLGIVTKVSILTPPKLSSVNVAFLACKDYISCQKLLQDAKRKLGEILSAFEFLDSQSMNLVLNHFEGARNPLPMSMHNFYVLIETTGSDESSDKQKLEAFLLGSMENELISDGVLAQDINQASSFWLLREGIPEALMRAGAVYKYDLSIPVEKMYDLVEEMRTRLGNAANVVGYGHLGDSNLHLNISTPQYDDQILLQIEPFVYEWTSKHHGSISAEHGLGLMKANEILYSKSRETVQLMASIKNLLDPNHILNPYKVLPHSLIS*
>comp50460_c0_seq1
MARSVPLVSTIFVFLLLLVATEMGPTMVAEARTCESQSHRFKGACVSDTNCASVCKTERFTGGHCRGFRRRCFCSKHC*
>comp49214_c0_seq1
MAKANAKDKSPSSALHPPYFEMIADAISTLKERTGSSQQAIAKFIEDKHKKVLPPNFRKLLSLQLKKFVKSERLYKVKNSYKISSTEKLHHQHSEVSQTQKNKTAKATNKTAPPPKQKGAKKVTEKKTKRLSQVKTPEALKKKATTNNKKNKKKKSVAVASSGGKVKRLSQVKTPEAMKKKPNLTPMKRKSTPKPINSSRPTKKARK*
>comp41346_c0_seq1
MCRYRGLLGEVITDLRRSNYKLRPTSGMYMECIEYRHKENQFHEIAKTGLRQESQTNP*
>comp21503_c0_seq1
MTPNISFCPNVVTEAIEAKFRAIIVKDNSDHLLIYGVLDLITNRFWKSNGPITKLLC*
>comp630_c0_seq1
MSKSDKKERADFTIREMGLQDAIHTRIGGCGSKGISGGQKRRVSICIEILTRPSLLFLDEPTSGLDSAASYYVMSRIAILNKKDGIQ
>comp32097_c0_seq1
MHAFYKILKYHKVRFMMLYEMLLAYFSFWS*
>comp82368_c0_seq1
MRLKHVNMKLKPHLQTCVAHPNTPLRSVWFNGGERTRGILMEGWREREGGERF*
>comp44513_c0_seq1
MAATRGGRFRELIKKYGKVALGVHFSVSAASITGLYVAIRNNVDVEAILEKFHMGAVSDQQNQNPSPSASADPDAAFVFENKPASSELVQDKKDPKNRTAQLAASAGGAFTLALLCNKALLPIRVPITVALTPPIARFLARRNIIKTGI*
>comp151949_c0_seq1
PQDFKILLFDCKYFIILNLLS*
>comp176547_c0_seq1
YFEVGPSSFHFYSPPVILFSLCLSSKTVYIILQ*
>comp48437_c0_seq2
MERLPMEICLKIFYFLDYQHLAVAQQVCRKWKLMASDNALWSNLFKERWGGDHAAFYAPIGPKSWKDVYEVQDRCNRVGVGLKIIREGSDYYLVHQGEIQRHLGSRRSREQVTGNSCHTFSSETGEGSLAEERSCRGILDKILFFIGDLEVASADAKRSRVI*
>comp14061_c0_seq1
MRYTTIFSPLPLHSPSSHQARIQDKPHQQMSSCQPTKTIF*
>comp418928_c0_seq1
MAVPAIRHIHNSVGGRTISIEPGFSFLQQKIDHYWYLRQKVKGKVITENSEKFIWHHV*
>comp34484_c1_seq1
MFSFYLYTLHKIVRAFFVLLIHISFSKATKILFSLLSHSFIQIIKINKIIFQK*
>comp44435_c0_seq1
MADSAKKEVKKTTVTSPAKKDAAPAAKKVGKTTSKKLPAVPESILKNRRRRDAAKAAKLKSLVKKRAEKFKKRKLIFKRAESYVKEYRSKERDEIRLARQARNQGNYYVPAEAKLAFMMRIRGVNQVSPKVRKVLQLFRLRQINNGVFMKLNKATINMMRIAEPYITWGYPNLKSVRELIYKRGFAKIKGQRIPITSNEMIERKLGKFGIICIEDLIHEIFTVGPNFKYASNFLWPFKLNTPTGGWRKKTNHYVEGGDFGCREEKVNALLRRMV*
>comp1253_c0_seq1
MHHIYEHTSYHDKQAQNNGYNHSIYASWDTYPDVLSRWESKKDVVTCIYQIKDDSIMIKKDRCSCMYVYMYVCMCV*
>comp8937_c0_seq1
MRFLCLGFYLQDHIEAKP*YSKGTNYIFQQGFAFLYRFILPLN*WKWYRFLICLCSCAF*ISFVGL*NFIFFDDDS*IEYEF*VQNSLYFPFLCFLLC*SSNET*VCVLSASSLQYEYEHD*GKSVISFCSFFANVDCSRFLYKPKLQNQNGCHFH*NVVYALMHIS*
>comp34453_c0_seq1
MPGSQFHFLSEFRSKWASSMVFHELFYTKFGNKHFDKLNTF*
>comp46415_c0_seq1
MASSSKDRENFVYIAKLAEQAERYDEMVDAMKKVAKLDVELSVEERNLFSVGYKNVVGSRRASWRILSSIEQKEESKGNELNAKRIRDYRQKVELELSNICSDIMIVLDEHLIPSTNVAESTVFYYKMKGDYYRYLAEFKAGNEKKEVADQSLQAYQMASTTAESELPPTHPIRLGLALNFSVFYYEILNSPERACHLAKQAFDDAVSELDTLNEDSYKDSTLIMQLLRDNLTLWTSDIPEDGEDQKMESIARSGQGEDEVGR*
>comp35082_c1_seq1
MGTREVNLNLMESWTTGNTILGSIFSFLNSLCQQVKAFPYLRILDNFSIF*
>comp239657_c0_seq1
TNQTLSICISQIELTKSANIHDEDSFCITNDTPIDCITNTQKAKFFLLSITQKEK*
>comp15825_c0_seq1
MQFITTSYALEVFSEKFYTKVTHVKCLKQISFHSREQPTHCIIQLKKKEEEEEIIRKIFSADLLTNKYNA
>comp56868_c0_seq51
MLRAFCVSLSRARTSTKILSSLSSSPSPYSRSSNSKKRNDEYDDDDAAARAPELVSLFNRDPARASPPKLLVVQPRLRPDKFLQAKLNEALCLANSLEDQRDGYFHTDFFDKGLPPHLLVQNPSMKGHKARADTYFGPGTVDNIKCHLYAAESKGEVDAVFVNTILSGIQQRNLERAWKKPVLDRVGLIIEIFNAHAFTKEAKLQAELAALTYKKTRLVRVRGPGGRYTFGAAGEAEVVSARGRGSGGQGFISGAGETELQLQRRRILERRNYLLSQIEEVRRTRALQRAGRKRHGGSFGQSLATVAVVGYTNAGKSTLVSKLSDSDLYSDCRLFATVDPRLRSAVLPSGRKVLLSDTVGFISDLPVQLVEAFHATLEEVVEADLLVHVVDSSAPNLDEHRSTVMQVLQQIGVSEEKRQNMIEVWNKIDVEEECMDIDEYLDEDKEADETSSFNGGGDVKSETLAETEKDDTGSISGAENEGIKEVDNYNVNYVCKQSLDDYEAMEGKEEYSDGWLYEDTLVDEGDFCLPSTVADQQNESSNMDSGVEKESKDSSMGQSGPHVKASAIMGVGLQELLELIDKKLSVQDEKLKGAEVVERSIFDRKWRPSQTQDSGIAVEQ*
>comp47961_c1_seq2
MITIRRMPSFPVLVLARCMLLLHGLGMPRMRMKHAGFERLPLMDIVRIASFLGMASQRVSC*
>comp23732_c0_seq1
MIATAQPKHINKLCFFSFPIPASYLLIFFFCCINIAFPL*
>comp49786_c0_seq1
MAFQKIKVANPIVEMDGDEMTRVIWTSIKDKLILPFLELDIKYFDLGLPYRDETDDKVTVESAEATLKYNVAIKCATITPDEARVKEFGLKQMWKSPNGTIRNILNGTVFREPILCKNIPRLVPGWTKAICIGRHAFGDQYRATDTVIKGAGKLKLVFVPEGQGEKTELEVYNFTGEGGVALAMYNTDESIRSFAEASMSTAYEKKWPLYLSTKNTILKKYDGRFKDIFQEVYEASWKSKYEAAGIWYEHRLIDDMVAYALKSEGGYVWACKNYDGDVQSDFLAQGFGSLGLMTSVLVCPDGKTIEAEAAHGTVTRHFRVHQKGGETSTNSIASIFAWTRGLAHRAKLDDNAKLLDFTEKLEAACIGVVESGKMTKDLALIIHGSKLSREHYLNTEEFIDAVADELRARLSA*
>comp38910_c0_seq2
MTELSFFVGVIGNVVSVFMFLSPVHTFLRIIKHRSTEDFASLPYICTLLNSSLWTYYGIIKAGEYLVATVNGFGVVVETVYITLFLIYAPKRTRFKTGILAGILDVGILAVAIVATQLALQGEARIDAVGIMGAGLNIVMYGSPLAAMKTVVTTKSVEYMPFFLSFFFFLNGGVWLLYAILVRDYILGVPNGTGFLLGAMQLVLYGIYKDAKSSKNISNGLEEGLQHEHLISSSIQSHEG*
>comp47137_c2_seq1
MGRRPARCYRQIKNKPYPKSRFCRGVPDPKIRIYDVGMKRKGVDEFPFCVHLVSWEKENVSSEALEAARIACNKYMAKFAGKDAFHLRVRVHPFHVLRINKMLSCAGA
>comp42516_c0_seq1
MKLKAPYEHFFEGTNTRVSYAVEVTAYVEKFKMKKMSGIKSKQVFLWVPITEMSIDGPKGKKIFFKTPMGIGKSFPVTAFMTQEEKEKYLQDKEETKVNC*
>comp255988_c0_seq1
MRNPLRANACHAAYDHKIMTLFRTKQLDPKPDSNLGGQNNSQKHGPYIFKNQLRR
>comp157965_c0_seq1
MVEENHPLGGSMVRQRQLQPWPRLNNKERVEMKENHHPQQGQKWPAMATELSVSSGLANCLPPLEPPDLLHGAVEGLVGGQHRADKLRDLRFRRNLRAGKELPNLGQADEVMGQAQFT*
>comp304500_c0_seq1
MQLSVYLSSSLLFSSISFWFVGHCESFVFVMSTATYVFSFTAML
>comp58276_c1_seq15
MSELGDSDASRILGELDSLKDAKSIIEHKISVLEAQLKDINLQNDVATNASSCPPPPPTIGLTPDLIYRYSRHLLLPSFGVEGQANLLKSSILVVGAGGLGSPALLYLAACGVGCLGIVDHDLVELNNMHRQIIHTEAYIGQPKVKSAAAACRSINSTIQIVEHEEALRTSNALEILSKYDIIVDATDNAPSRYMISDCCVVLGKPLVSGAALGLEGQLTVYNYNGGPCYRCLFPTPPPTTACQRCADSGVLGVVPGIIGCLQSLEAIKIATSVGEPLSGRMLLFDALSARIRIVKIRGRSMQCEACGENATFTQQQFREFDYEKFTQTPLSVSPLKLNLLPTESRISSKEYSERILNREPHVLLDVRPAHHFKIVSLPKSLNIPLSTLEARLPEISSALKKEEEDIGVVSGSSAQVYAICRRGNDSQRAVQYLQKMGFTSAKDIVGGLESWAHNVDPNFPTY*
>comp187710_c0_seq1
MFGSLACESTQYMYIAIFLRIIITIIILSYKFEPNSLL
>comp50380_c0_seq1
MLELLTGRMPLDSSKPKPEQCLVRWATPQLHDIHAVTKMVDPALRGLYPPKSLSRFADVISLCVQSEPEFRPPMSEVVQALVRLVQRSSMKMREDLGAFGRMDDYDD*
>comp98588_c0_seq1
MILQKNWGSKFLTRDVHSAQREHTHSSRYLSYLQTYLTTHHSRIHNLKIKTKDDKIICSKPEERYHKSKCNSCRSNNKSKQE*
>comp55456_c2_seq5
MVATDWVDLKAMGNLAIAGHARALLEWRNISRFCGYCGEKTVPMEAGRRKQCSNESCKKRIYPRVDPVVIMLVIDQANDRALLSKQSRFVPRMWSCLAGFIEPGESLEEAVRRETWEETAIEVGEVVYHSSQPWPVGPSSMPCQLMVGFFAYAKSLEINVDKNELEDAQWHSREDVRKALTYAEYKKAQSTAAAKVEQMCKGVEKTHSLATDFNVESGELAPMFVPGPFAIAHHLISSWAFPDQNVNGVECHSKQPSGSMSNL*
>comp39419_c0_seq1
MKTVNEEIIFRRDPSHQVCDASLSLGVIPRLFFIIIYLLP*FS*FHQQPRSGLFLAESIKPSPHQIPNYSMFEFSLNTIKSTTSLSGAVHSSITAMN*
>comp31200_c0_seq1
MSSRFEVITIIISLSLQSLDSQQGGRNTRQSWANIHLQPTNKKVDERIKD*
>comp55255_c0_seq1
MAMSSIWLLLMLSLILGYTISHIEASRQTHYSTLTLNQTYRPAFHFQPSKNWMNDPNGPLRYKGLYHIFYQYNPKAAVWSNNSIAWGHSVSKDLVNWFPLQPALTPTEPYDINGCWSGSATILPGAKPAILYTGLAPKQHQTQNLAIPKNVSDPLLREWVKSPKNPVMAATIANKINATSFRDPTTAWLGRDGWWRVLVGSQQSDTEKGMALLYRSKDFVHWIQAKHPLHSAKRTGMWECPDFFPVSINGSVGLDTSINGPRVRHVLKISLFDTSHDYYLIGTYDTTKDIFIPDKGFEHNELSLVQRYDYGKFYASKTFYDGAKKRRVLWGWINESSVQEDDVQKGWSGIQAIPRTLWLHESGKQLVQWPTVEIEKLRTNPVHLHSKVLKGGTLLEVPGVTAAQADVEVSFEVYELGKAQVLDPSWKRHPQLLCSGKGAAVKGGLGPFGLLVLASKGMQEYTSVFFRVFRANNKYMVLMCSDQSRSSLNHKNDLATYGAFVDVDPVHEELLLRSLIDHSVVESFGGQGKACITARVYPTLAINDEAHLHAFNNGTDDVKITKLSAWSMIKAKIN*
>comp45083_c0_seq1
MPIVQKLYDTCKAFLSTDGPVSEEALEKVRAVLDELKPSNVGLEQEAQLARGWKALNGTNGKKARNGSHQYPPPIKYIHLHECHKFSMGIFCMPPGSIIPLHNHPGMTVLSKLLYGSLHVRSYDWLDLPGSHDLSQARPAKLVRDCQMDAPCGTTILYPNRGGNIHCFKALTPCALLDILSPPYSSEDGRHCSYFRKSPPRKDLPGPELDQLCGVKPSEMAWLEEIQPPENLVVKRGQYRGPTIRR*
>comp371287_c0_seq1
MTFTFKNQNTPDQLQATDSFIFVRFVICWNSYLIQSL*
>comp1792_c0_seq1
LLKFNSIPICIRKWKFKTFTIFQTLCVTFSLASD*
>comp360120_c0_seq1
MIFSRAVQSIFCMKMRRPMAPRHQSNHFILWVCVLIKEIRVNTQIGPPKI*
>comp60165_c0_seq5
MKRSRDDVFMSTPLKRPVVTSRGEASGQPQMMNGAAQKLTTNDALAYLKAVKDIFQDKRDKYDDFLEVMKDFKAQRIDTAGVIARVKELFKGHRDLILGFNTFLPKGYEITLPLEDEQPPQKKPVEFEEAINFVNKIKTRFQGDDRVYKSFLDILNMYRKETKSITEVYQEVAALFQDHADLLDEFTHFLPDTSGTASTHYASARNSLLRDRSSAMPTVRQMHVDKRERTMTSHGDCDLSVDRPDPELDRDLIRAGKEQRKHGEKEKDRREERDRRERERDDRDYEHDGSRDRERFSLKCKTDRRAEDSGAEPLLDADENFGMRPMSSTCDDKSSMKSMCSQEFAFCEKVKEKLRNPEDYQEFLKCLHIYSREIITRQELQSLVGDLLGKYPDLMEGFNEFLVRCEKNEGFLAGVMNKKSLWNEGHGPKPMKVEDRDRDRDRDRYRDDGVKERDRECRERDKSTAIANKDVSGPKMSLYAGKDKYLAKPINELDLSNCERCTPSYRLLPKNYPIPSASQRTEVGAEVLNDHWVSVTSGSEDYSFKHMRKNQYEESLFRCEDDRFELDMLLESVNVTTKRVEELLEKVNTNIIKGDSPIHIEEHLTALNLRCVERLYGDHGLDVMDVLRKNASLSLPVILTRLKQKQEEWARCRADFNKVWAEIYAKNYHKSLDHRSFYFKQQDTKSLSTKALLAEIKEISEKKRKEDDVLLAIAAGNRRPILPNLEFEYPDPGIHEDLYQLIKYSCGEVCTTEQLDKVMKIWTTFLEPMLCVPSRPQGAEDTEDVVKAKNDSVKSGNASVAESDGSPGVGATVMNPKHLNTSRNGDECMPLEQSNSCKAWQSNGDSGGKEDNCLDSDRTARKTETLGSSTQHGKMNISASTPDEVSGINKQDHSSERLVNDNVSLASGMEQSNGRANVDNASGLTATPSRPGNVSVEGGLDLPSSEGGDSTRPGTSTNGDITEGTNVHRYQEESVRHFKSEREEGELSPNGDFEEDNFAVYGDAGLEAVHKGKDGGVSRQYQNRHGEEVCGEARGENDVDADDEGEESPHRSSEDSENASENVDVSVSESADGEECSREEHEEDGEHDNKAESEGEAEGMADAHDVEVDGTSLPFSERFLLTVKPLAKHVPPVLHEKGRNSRVFYGNDSFYVLFRLHQTLYERIQSAKVNSSSAERKWRASNDTSSTDQYDRFMNALYNLLDGSSDNTKFEDDCRAIIGTQSYVLFTLDKLIYKLVKQLQAVAADEMDSKLLQLCTYEKSRKPGRFVDIVYHENARVLLHDENIYRIECSPAPTQLSIQLMDFGHDKPEVTAVSMDPNFSAYLQNDFLSVVPDKKEKSGIFLKRNKRKYACSDEFSSQAMEGLQVINGLECKIACNSSKVSYVLDTEDFLFRARRKRRTLRQNYSCHEQAKSSNICSSRVQRFRKLFSIT*
>comp370203_c0_seq1
RKPRNKTYKRIQNIIFKTETTFQTIQVFTFSSIPISLLAPF*
>comp58502_c0_seq11
MVHHRFLLITFPIQGHINPALQFAKRLDGMGVHVTFATTVYMHRRMTMTNKTTIHGLSIATFSDGYDDGFSVARDADVVFYTSELKRHGSDYLKNLILSSLQEGHPFTCLAYTPLLSWAAVVAREFQLPVALLWIQPATVFDIYYYYFHDYGDYISHKIKEPTCSIELPGLPFLLTTRDLPSVLLASNVYSFALPSLKEQLQVLDQETNPRVLVNTFEELEPEALRAIDKLRLIPIGPLIPSAILDQKEPADTSFGGDLFHASNGYVEWLDSKPELSVVYVSFGTLAVLPKRQMEEIARALLDSGRPFLWVIREKEKEGKEQREELQEKGNEEEGVELSCREELEQMGKIVKWCSQVEVLSHPSLGCFVTHCGWNSTMESLVSGVPVVAFPQWLDQKTNAKLIEDVWKTGVRVDHHVNEEGIVQGEEIRSCLEVVMGSGDKGEELRRNAKKWKGLAREAVKKGGSSDKNLRAFLDDVGEYGRVAEN*
>comp50574_c0_seq1
MATSFSPTTPIRSTFQPHQNPPKTLVSLRESFYGGSNCVKRCGGTLSVRSWSSAASYVSVKLAGGFTVSGRPIIFSRRLLQRTGVVRAATIEEIEAEKAFIEKDVKSRMERTIENVRSNFNSIRTGRSNPAMLDKIEVEYYGTPVSLKSIAQISTPDASSLLVQPYDKSSLKAIEKAIVSSDVGMTPNNDGELIRLSIPQLTSDRRKELSKIVAKQAEEGKVALRNIRRDALKAYEKLEKEKKLSEDNVKDLSSDLQKLTDEYMKKVDTIYKQKEKELLTV*
>comp40454_c0_seq1
MPSSSLALSFTLFSLCFSKYFLEMKGKLQTSYHSVEIFLHHEIKSMQYLPCFTSISMPHFIV*
>comp291626_c0_seq1
MPRWCLLFVSNFHSVVFTLNKNRGENCH*AYLLHPLHTF*ESYF*NKF*YIAAFKSVLCTFQIKETFIQGFNRDRGLNLANAVHSLRPRCLCCHIIIYLYKVDFFFLKPAL*VPFLVP
>comp42509_c0_seq1
MHPKYDSQYRPRSWVNKLLIQISFHAVTPTQQLTKTKVLLASQNYTV*
>comp50871_c0_seq1
MAAAAGSSATSLPTLRTEGPAAFRRSPPPPASQFSIFFKPSINRARVSAKSPSFNPRCEVVSENLVQKNGIGFKPSNPSALELLKTSAANRYTKERSSIIVIGLNIHTAPVETREKLAIPEAQWPQVISELCALNHIEEAAVLSTCNRIEIYVVALSQHRGVKEVTEWMSKVSGVPIPELCKHRILLYNRDATQHLFEVAAGLDSLVLGEGQILSQVKQVVKAGQGVAGFDRKISGLFKQAISVGKRVRTETNISSGSVSVSSAA
>comp19879_c0_seq1
IQVPHTLKEFKLLPYRLAYLHLIFYYTFSKVDYINNIHKLPFSAVLFELDHSS*
>comp38878_c0_seq1
MSTQDIKIIYILYLYKNSSVLNQILYLFTYFVETNMTRS*
>comp170886_c0_seq1
TKTTTSTLHSEKEEIKGIKIITLWYPKNISRHTAINPTKGLHTASLL*
>comp54865_c0_seq1
MTTKHHQQKHCILEMGHKGIWIWNPLKSSAWYLWTKMKAKVISFA*
>comp58344_c0_seq10
MERALNLVDMGKDKVVSNTPLLTSSTKGLKYNTVTNNNMPSWLLSSISDLDERMKVLAMGKTEDEEAGDTFAERAESYYQKRPQLLSLLQDLYNGYITLSDRYIQTLAKHKHHSRHSSQVSTVDEGFSDQEEASGVSQIDSDIESSISYQQPPPMMPMILPSSAMLDVDAIVAELVIKNVEYDVLVHEVSVMERKYCESSRKSELQKSLLEVLESERLVLLNENASLSYRVNTLVEENKGLASESVFIKRKAGELAKCVLKLREDHRVYILHKKIEDLQAQIHGLEKRNKEYYEKLLKSGSQQDESCMENKGKNGDEIALEVRVQMEKLRRYKWKDDTSGKDFDGKKGHSLWKKLKNMDLLLCGMNPTCA*
>comp608834_c0_seq1
MGCLHNSRNQITEYNGSVLKYRVLTIT*
>comp40038_c0_seq1
MILITFTSLKTLTFRQNRFVQTQTTINGSFGLISLPVSKSSGA*
>comp52111_c0_seq1
MKGGKKYSRFGPWNGIVRSGNPQVENNSVYDFDFVHTKEEIYYTYHLKNNYVLSRVVMNQTEYTRYRYVWVVAEQNWRIYSSKPVDDCDRYGLCGANGNCIITETPVCGCLKGFRPNAPQAWNSLDWSQGCVHNKPLSCKDKQKDGFVKMVGVKVPDSTHSWLDETMGLEECRTKCLNNCSC
>comp39809_c0_seq1
MSSRLLYLSSLICSLLQRFFCGSAVPLVHIHSSNIHLFCFFVSNIRH*
>comp309705_c0_seq1
MFFVNGQGRTFCGRTTTSTSYVANRITVIYKKHNREYQLPLDYFHCSVDSKIIAKCGPVSYRPPSNDHQLNKIDDTYHGISPGLLATTCSCGWTNKRILNYNTGGRLVGGEEYTIHE
>comp50565_c0_seq5
MEFRVSIISSLLIFFSIFSPQARAEASGSVFFIDGSTHQFLRARSPSHEEVEHPSMLLLEVGAAVSVLLGFAPPSTLSAASASKLNEILIPNPFNRPRAVFLLEVNGINGLEKIVQDNAMFGNSFRSTDFLGSDKVDIQLPDENDVSVVSLDEPLEECTDKEISDFSSLIGGSYAPDALEPLNGVLTIPLANGAMVNLHMSKKSERKFTAGLLSLIRNVKRAIQMHEDLSQSTQSPAELLTGCFNGIKVLQEQHEAESIAQHGVELLLATLTKIFGSLQEAYKGQIVGVIYCHTATPQELGKKFDVIFTPHHTARWLAETKTVNSTDPEVVLVRRILAWVTGVILLISTLIGIYYLFYMPLTRDTLLYSNVKLD*
>comp135522_c0_seq1
MVFSFFLQRVFTENCALGLCPHIGVFDYLTTYSTSTSIVVQVKLRYKNVHLPHQWTKW
>comp17100_c0_seq1
MPFYGGWGWSPFSFFAPGPSAAVGIEGGFETIVLFIFLGAAAAAVRKYFWSRDEDDY*
>comp1830_c0_seq1
MSSSSVCRGLQSCLEPGVIEPRVLRLKLAPPGSNFSGPSGWPSSSRASSSDSEVFSQEKSLTNDECDIKDTNSNVGGWGWSFLQSLTHTSHCNKTQEPETEKVYVHP
>comp733214_c0_seq1
MAHTSTYLWCLFCRTIVGLAIGTTWKYVGPEAFNAKAMRYFWIGGIFRGNYQ*
>comp53206_c0_seq1
MESIWLSTTGSVVPRAGLAVLLMLLLSCFTFTSTEAYDALDPTGNITIKWDVISWTPDGYVAVVTMFNFQQYRHIQAPGWTLGWTWAKKEVIWNMMGGQTTEQGDCSKFKAGIPHCCKKDPTVVDLLPGTPYNQQVANCCKGGVLNSWAQDPSNAVSSFQISVGSAGTTNKTVKLPKNFTLKAPGPGYTCGPAKIVKPTKFITNDKRRTTQALMTWNITCTYSQFLAQKTPSCCVSLSSFYNDTIVNCPTCTCGCQNKTEPGSCVDSDSPHLASVISPPGKATNTPLIRCTSHMCPIRVHWHVKLNYKEYWRIKITITNFNYRMNYSQWNLVVQHPNFDNLTELFSFHYKSLTPYEGLNDTGMLWGVQFYNDFLSSAGPLGNVQSELLFRKDKSTFTFDKGWAFPRRIYFNGDNCVMPPPDAYPWLPNASSKLVFSLLSTFIATLASLVILLN*
>comp37070_c0_seq1
MIGPTQYNMLVSETFFVNQSIIYAL*
>comp46092_c0_seq1
MEFRCLALCALFCFVLVGSHASLPAEDYWQSVWPNTPMPKALQALVQPGRTTRAKIGNSKFDLDVYGGAASEISVPRKLKDTLNMTTYFFEHDLRPGKKLNWQFTKRSDEFTFLPDKVAKSIPFSSNKLLEVWNRYGIESKSAEAETLKYTIEVCENPGIKGEDKYCATSLESLIDFTVSKLGKNIQVLSTEFERETQKQQQYSIVEGVQKAGDRAVVCHKLNYPYAVFYCHEVHATRAYTVPLVAADGTKVKALAVCHTDTIVWNHKHLAFLVLKVKPGTVPICHFLATDTILWAPN*
>comp36432_c0_seq1
MLIAVIILDNQVSKISCHHRIQNSYPNRNSKTEIDVCQKSKNCKI*
>comp18269_c0_seq1
MSSSTPPPPSATPFVAQSFSTPVATKLDENNFLPWKQQVLFTTKGYKLKKHIEEPNGGQPKKFLTEKDQLGGEVSTEFDNWEHQDHLLASWLLSSMSDNLTTRMVGCEYSYQIWKKLEIFFASQTRAKINQLKLQLRNIRKTGSLNEYMLSFKEIVDMLAA
>comp381924_c0_seq1
MLVRVVKGWICLGYCHFVSSHECNYAISWYIAKPYGQQQRILDHNHLEIVYKFNGNNSIIFSKTLQ*
>comp53069_c1_seq1
MILLPEPNQSCPPAITFNCFSLSTSSRIKRTFFPWSLLFIIEIPLLTSPTLISFSPTISESSVSWSCTRP*
>comp59565_c1_seq1
MKKKIKSLASSLPSSYSSASHTDLQFCFEFLNQNFFLSFLIDFIHKNIIF*
>comp49018_c1_seq2
MATVVSEPACLRKAHDIASSFNSKWQSALVRKKPHTQLLLYSSGIRACHSMADNKEVYKQVGLFSLRRKIEDAVLRADMFASTALEMEEARWTKQEEMVRNFDLWDDPAKSNDILVKLANSAKVVDALKDLRYKVEEAKLIKLLAEMNVIDYGLYKQAYDASLDVSKILDQYEMSKLLKGPFDLAGACLIIKAGPGGIYPKLWAEQLLSMYLKWAKKQGYEGRIVDKFPVKNGGINSATIEFEFECAYGYLSGEKGVHYLIRSSQNESSQLEASSAIVDVVPMFLENARDLEIDSEDLIISSPLIHGKQKRQTELTVCIQHLPTGISVQSSGERSHFANKMKALNRLKAKLQVIAREQGVSSISSIRKDNIVNLWQEETRRYVSHPYKLVHDVKSGIDVPDLNSVLDGNIGPLIAAHINIRESCHKV*
>comp202014_c0_seq1
MLNVCHQKGIRFVHLTKGAVSQPTSDTNPMAPRLSTLDTPFGAFD*
>comp29573_c0_seq1
MSLKYYDHVKESIHYVIHNKTLNSKTCIESAIKEALRIIQMSEALKVSVTFFTFYHAQNHTLL*HAVYQFLKIKYSKLNSDPSII*TKSQSKMPTQKYTLCMTGRILSG*
>comp59734_c0_seq7
MSSNALTLFILFLNISLFPAISALNQEGLSLLSWLSTFNSSNSATPFSSWNPTHKNPCSWDYIKCSTEGFVSEIIITSIDLRSSFPTQLLSFGHLTTLVISNGNLTGEIPNSVGNLSSLVTLDLSFNTLSGTIPAEIGKLSKLQWLSLNSNSLHGGIPTTVGNCSKLQQLELYDNQLSGMLPAEIGQLRDLEMVRAGGNPGIHGEIPMQISNCKALVFLGLADTGISGEIPPSIGELTNLKTLSVYTAHLTGHIPPEIHNCSALENLFLYENQLSGNIPYELGSMKSLRRVLLWQNNLTGTIPESLGNCTSLKVIDFSLNSLVGQPPVTLSSLLSLEELLLSDNNISGEIPSYIGNFSRLKQLELDNNRFSGEIPPVMGQLKELTLFFAWQNQLYGSIPTELSNCEKLEAVDLSHNFLTGSIPNSLFHLENLTQLLLISNRLSGQIPPDIGSCTSLIRLRLGSNNFTGQIPPEIGLLSSLSFLELSDNLLSGDIPSEIGNCAQLEMLDLHSNELQGTIPSSLKFLVGLNVLDLSANRITGSIPENLGKLTFLNKLMLRGNHITGLIPQSLGLCKDLQLLDISNNRITGSIPDEIGHLQGLDILLNLSWNSLTGPIPETFSNLSKLSILDLSHNKLTGSLRVLGSLDNLVSLNVSYNSFTGSLPDTKFFRDLPAAAFDGNPELCINKCHASGNRQGIKSIRNIIIYTFLGVILTSIFVTFGVVLALRIQGDTFGRNFDEGGEMEWAFTPFQKLNFSINDIVTKLSDSNIVGKGCSGIVYRVETPMKQVIAVKKLWPIKNEEPPERDLFSAEVQTLGSIRHKNIVRLLGCCDNRRTRLLLFDYICNGSLFGLLHEKRLFLDWDARYKIILGAAHGLEYLHHDCIPPIVHRDIKANNILVGPQFEAFLADFGLAKLVSSSERSGASAIVAGSYGYIAPEYGYSLRITEKSDVYSYGVVLLEVLTGMEPTDNGIPEGAHIVTWVSREIREKKREFTSILDQQLILQCGTRTPEMLQVLGVALLCVNPSPEERPTMKDVTAMLKEIMHENDDFEKPNFLHKGLVTNPKAAVHCSSFSRSCEPLIESPSSSS*
>comp41375_c0_seq1
RKHKLPTKLHCDFLLNNHNSKVVYRATKSFPTPRYKIVKI*
>comp13182_c0_seq1
MQGVDDDRKNIVIVEGGLDVVRPEPGPRANGLEETICTLRVREAVGSPSRADIYTPRAGRIATLNSIKLPILADLQLSAERGVLYKNGVYVPHWNLNAHSIVYVTGGRGRVQVVDNKGKSVFDREMEEGQVVVIPQNFAVVKQA
>comp298391_c0_seq1
MFVEITCNRMLRKQGQSCTNADGNRRISFFVNRRKLFNSSS*
>comp36919_c0_seq1
MGFHQRPPHHMVLSGLHSCQSSFAYLLDIGKSRLAKSRDVWDRLKSIGLNHLSLDIANHLNNTLELKKLGMGQTHDSKRGQHTTITPHLW*
>comp320166_c0_seq1
MILLLSLFLCLSYPFQLFIPLRQAISIPFINDNYSGSCHRKQNQVKKQTGLT*
>comp166429_c0_seq1
MLCNISVCYSLYTLMIIHSQLSITTHVILLLLFFFFLSLFSSEFKDQSDGL*
>comp414_c0_seq1
AGDIESSSKNSNPPHSWTICLESYFL*
>comp366683_c0_seq1
MQRKKRR*SAFVSHFFLDYVAIF*I*HC*SIYVNVRLLCSLLRSMHFPCLSCCYANNGFSLYHKMLPCITKNCKELAVDKSHRSKFFQYTMHRPQPFMY*
>comp135705_c0_seq1
ACEGHYTSKSLYLIILVFSLLEPVIYLFDLLHEFLFNLVAIY*
>comp48138_c0_seq2
MIRAVLVMNTQGKPRLAKFYEFRPVEKQQEAIRNVFAVLCSRAEHVSNFVDAEPFFGPDARLVYKHFATLYFVFVFDSSENELAMLDLIQVFVETLDKCFRNVCELDVVFNYSKMHTILDEIIFGGQVLETSSTEVMKAIEEISKLEAASNAINLVPKSVSGWRSR*
>comp364588_c0_seq1
MKSNGLRKLEKMHQKDNKSPANLAGESPEGFN*
>comp50132_c2_seq1
KIYKFYYDNFKTHKYIIQKRNRTNKKNKLLQLSEPDSPASRPYRHALTSTSLTNAIIP*
>comp39411_c0_seq1
DDTTHKNACYQRSGFGGRQEVCACTTDLCNSSPALFLSSTTILATLALTLKSLL*
>comp38846_c0_seq1
MVHNFHYCFLKCISYFFTSKISYLFLTLTCTFTSGFHFTCVVSMLLYSKMYRLSLVATVREGYDSLFLLAFTCVKGWV*
>comp56823_c0_seq14
MDIDFKDYQLRCELRGHEDDVRGICVCGNEGIATSSRDRTVRFWSLDPSENRRFLCSKILLGHSSFVGPLTWISPNDEYPQGGIVSGGMDTVVLVWDLKSGEKVHELKGHKLQVTGIAFDDGDIVSSSIDCTLRRWKSGQPIEIWEAHKAAIQAVIKLPSGELVTGSSDTTLKLWRGKTCLHTFAGHADTVRGLAAMSGLGILSASHDGSIRLWAVSGEVLMEMVGHTAIVYSVDSHASGLIVSGSEDRYAKIWKDGVCVQSIEHPGCVWDAKFLENGDIVTACSDGVVRIWTVHQDNVADPLELDLYASQLSQYKSSRKRVGGLKLEELPGLEALKIPGTSDGQTKVVREGDNGVAYAWNMTEQKWDKIGEVVDGPEDSTRPIHDGIQYDYVFDVDIGDGLPTRKLPYNRSDNPYDAADKWLLNESLPLSFREQIVQFILQNTGQKDITFNSSFRDPYTGSNAYIPGQPSYTSAVSAKPTFKHIPKKGMLVFDAAQFDGILKKITEFNNALLSDQEKQNLALTELDVSRLGAIVKILKDTSHYHSSKFADTDIALLLNLLRSWPIATIFPVIDIVRMIVLHPDGATLLFKRFEAENDILMEVIKKVTVNPIVPANLLTSIRTVTNLFKNSCYYSWLQKHRSEILDAFSSCSSSPNKNLQLSYSTLILNYALLLIETKDQEGQSQVLSAALEIVEEEHVEVDSKFRALVAVGSLMLEGLVRKIALDFDVLSIAKAAKGSKEAKIAEVGADIELLTKQS*
>comp537_c0_seq1
MDFFSSSNVEIVDYLLFVHLLGVNSIPSIFPQTVNSRGAAMIRESGHIPYAEKIIESCQLMLGAYFFTFFCSFFYF*DGIPPKFIDIEWVTYGLFFVYTFTMLALH*
>comp54115_c0_seq2
MDWGVNNHYRTYKDEHKSMMDVALISNMDPVNIGLGCSEKSIPITSVKPRKKTMTSVYLKFFETAADGKSRRCKFCGQSYSIATATGNLGRHLANRHPGYDKSGDAVSNSAARSTAVVKKSQPQGKANQVDYDHLNWLLIRWLVLASLPPSTLEEKWLVNSYKFLNPSIQLWPSEKYRTVLDEVFRSMREDIRALLEQVSSKSSIILDFWTSFEQIFYMSVTCQWIDENWCFQKVLLDICRIPYPCGGAEIYRSLVKVLKLYNIENRVLSCTHDNSQSAIHACHTLKEDLDGQKIGPFCYIPCAARTLNLIIDDGLRSAKPVISKIREFVIELNASTVISEDFIQISTAYQEGTWKFPLDVSARWSGNYQMLDLVRKAGKSMDAVIRKYEEMLGSRMLLGSSDKSVVNIMHQYLEPFYKTTNNICTSKVPTVGLVLFFMDHISETIATCRESRHSPEWLKSPAEEMAKKARNYINQVCNIFTYMTAILDPRIKGELIPESLNSENFLDEARTHFMRNYSTSHFPSMTSGYNAQEIEDGGSVSFAEEIARKKRRTSMSSATDELTQYLSEAPAPIPTDVLEWWKVNSTRYPRLSVMARDFLAVQPTSVVPEELFCGKGDEIDKQRFCMPHDSAQAILCIKSWIQVGIKFKFKSTEIDYERLMELAAVAAATDNSPASSDKKQK*
>comp2626_c0_seq1
TKWEIVGETALLVLKYIRLHKLKIEATKRWKTEVSIRILLNTIKCLNIRY*
>comp54828_c0_seq6
MRWCCCEVMSGALSPTVTAACFCNRESVLFQFQKPFLFKFKFKTFSSLSLTHHRKLLVVPTAPPSCLNKANGHCRGNGFACGCSTSSQCSAAETSSHDFVVVNFYHFVFIKDPEAQVAKHLSFLEGLDINGRVYLNEQGINAQYSGPSKDALAYVNWLREDNRFSDILVQISPSENGHAFPKLKLRYKPSLVQFEGGISHLPLLDPSMRAIPLAPSEWRNRLEAINRTDLTSKEYPNRNYILLDVRNGYEWDIGHFHGARRPNVDCFRSTSFGLSQEEITASDPLSNVDKEKVNILMYCTGGIRCDVYSTILRQQGFQNLYTLKGGVSHYLKNEGPAEWVGNLFVFDSRLSLPPSVYSPQAITEAERTQISGDDKFAKCYICSLEVSELRHRNCANLDCNLLFLCCRKCVKDLRGCCCWSCTTASRLRPVLNGDRRYKKWHIYRDMDLPGKMKIST*
>comp1964_c0_seq1
QLVLAKLPAQNQSYHIQDTSKHAFACSSKCPEQRLSDIHAIKLSYGLTFNSILE*
>comp210156_c0_seq1
MSYTLFPFFPVVTVLLSSDIVAITAFSMFLETFIFLK*GRKIG*L*RHEPHRLIILY*YLTSIHLPSKEK**ACIAAEHSFFFVFFLFFISKRQDSLQFICFA
>comp45804_c0_seq1
MKNSYPALCIMLALLLAQTELSMAVTCNAFQLSACASAIISSSPPTAVCCSKLKEQRPCLCQYLKDPNLQKLVNSPNARKVANACGSPFPSC*
>comp525266_c0_seq1
METVLREGMLLAMGNPLLDISAVVDDKLLVKYGMNPNDAILADEKHLPLYKELSEKYSVEYIAGGSAQNSVRVAQWLLGRPEVC
>comp46289_c0_seq1
MLCLKTRLSFSPSFSLTFSPSKHLRQLQPSSSFKPYSHSSPSRSSSIKMSTQAVEHIVLFKVKDDADPSKVSAMVSGLSSLSSLDQVLHLSVGPLLRNRSSSLNFTHMLHSRYKSKEDLEAYSAHPSHVGVVKGSVLPIIDDIMAVDWVAEELNGHLVPPLGSALRVSFLKLKENLGDQVKNEVLGVIRGIPENFKQISQLTCGENFSPARAKGFSIASLAVFPGTSELEAVDSNEELVKYQKDKVREHLESVLVVDYVVPLPPAQSASL*
>comp281113_c0_seq1
SSGPRGSIRFARSAQSIYNDAHVCLSFTTFFALLLQVLPLCKLISRFCVLWFCLVLGLWLFPFVLS*
>comp36691_c0_seq1
APELLRTSKLSCIFIIFFVFVFICILVSCRNLCELYNAGATVCIV*
>comp59955_c1_seq1
MIEKYRMVLLKICMTPLFSSTFSALFKRA*
>comp46517_c0_seq1
MKSFSMNQLVETFPNFSLARSYYEDMGNSILSMTSKYGEDARAATLYVILGCLCLWYVKRYWRSKRSSRSPSPDLITKSRFLGELYGGALALQRLLEDYYKAQVNPATLDNTESLLKALLEEEHLDLMKLQSTVMKLEMSGREGNAVQILERAKKAHAGKPQQAYEIEMLLVEMLIFKGDWKCALKCECLKHEEIADARRPLYKAILHKLLGKTKEAKDCWEEFIDIRRQMKDPTSFDEGSHETITDFEMFENEVDELRSAIKNKKKFAGRN*
>comp251615_c0_seq1
MIGDEEAKGDTMDEEQMILANEEIPARETRSLGRGKEKEKEKVVRASAHRNNALERIKNERNQELGKKEMGVGRVNGSISLRPESDPNRPILTTHMVGPGDPQLLR
>comp35971_c0_seq1
MSHTVFIATLACLAAVCLAAPLANYASLTNPVIMELEQAMTISVATVKVPEFQPKADDPNEGLKRIAYDVTAGVYEHSGLIYERIWILRRFDEMRNVVVEDALKSVQAKLHAGSQEEAKKTILGACEGLIAEAKPALAEANAIKDSSERQAFLYKDESLLRLAKLDIFCKFLQ*
>comp43601_c0_seq1
MGNEMGNNNTSAIKEEDNTSEKTPLEDTSELANGISQDVHADGVKEENPNIPTSIAKDVMEKTAKASDETTIELGKDTQQEGSHVDDVKEKIQTIPTAEAKDAQVKATSITSNNTKSMLENDSLE
>comp56140_c0_seq5
MTTGIVRDQNLEKHIEKQMGCMAGFLNIFDRHQILAGKRICSNKRLPPSAPPEEPEESTSSPEGVRQSSLREAQSPTPPVLQFKEGTRSSWKFSPRLSLDSRALVDAKGGLHPRQIRTDTSMLSTNQCENPGEGSESDVEKQRRSTSVVARLMGLEPLPDSDPEPVKMAELRRSASESRVSRDLPQYRFFDSNNFQLKQSNTRGKGNSAGNVVRDNAAAAIDNRLSNGRAADPKGFAVRNAKTESAKAPLRLRGIGQKKSFYDSADFFPEPKHSVSIYGEIEKRLKMRGIDEPSKDLDTLKQILEALQLKGLLHSKKSTPPTNQRNFVFDRTISANESPIVVMKPARSLGSLNRLGRTGSESPPSSFWSSPRARRNNETLNAASPRQARARNSSSPTRSESSPNRMGKLTNMETQRKVNDGVDPRWVAPVHSPRINSRRNAPDQQVTSRSPRIRKVTYHKEEKVMSGAEDESSTISESSFSTSSQTDTERFKLEEYKEGRNLLERCDKLLNSIAEITAATEMQPSPVSVLDSSFYKDESSCSPSPVMKRCIDYKDTEQAAESEDDTWLCCSEAKSDEPSSDDCDFVYVSEILRASIYLPEDSDVFLLLEKQQYLKGNDTSKSSTLRRRLIFDTIHHILNRNRRLPPWKAVSWVEKTPLLQRIWSEFRRIREREESEDLFDVICGVLRKDLAEDAMNEWGECPMEMGDVVLDIERLIFKDLIGETIRDLASFTGYCNKLSALRRKLMF*
>comp42087_c0_seq1
MESSSLQQRYSFQDHTDNTREKTEITEKKSRNSGHLLAFHTLKISTPDLPLQNSLMPLMVSLPPIKPLLRCFLLGFQNLLPLQSCSASWLGCYSQPSLSSSVHHVFPAP*
>comp530749_c0_seq1
MPIIRFIAPDLSHFNQTKMIGDALTAFMRELVSEHRNSQISQSKDSARDFIDAFLYEIESRPPGEGNSEFSEEQLLMLLLDLFLAGAETTNST
>comp636_c0_seq1
HSLRWPINTYDPGDSFIHLAKWSGNKHITGSLDGLD*
>comp20745_c1_seq1
LVELLQSEYIQSTITSAVKLRCNSN*
>comp47605_c0_seq1
MRPFSNINSYVFLLWSPSRQPALNFQQFASIGVYTFSLLLKPCSTPSPHAIQRKMVVAIILTSA*
>comp6548_c0_seq1
MGYFLTRGPVVSFKNSIILEHLNSSVVFFF*
>comp25309_c0_seq1
MEATKQNNKTSTLSSTHTICLFFQLKIKGVQQYSFGDLFFCMSGSGPSPICSPQSTKSVVP*
>comp395674_c0_seq1
MLLALPLTLLILSTVTWVILASPSFMRWFPVFLCCLLSKSCQLGKQAHTLLPKHVNDWFVSPLNWWILMSGILVESFLF*
>comp8455_c0_seq1
MLIDLVYTTYLSLRLRRLDCSCNLCTSYPVLTLFSPSVLPFTSSFCLFFSFLFPLLAGLEFVWPGDGWVSGRGYVPLHELSFFFIVSSLCFFL*
>comp46077_c0_seq1
MEIQQQPIKSRFTSICVFCGTSPGKNPSYQLAAIQLGKQLVERNIDLVYGGGSIGLMGLISQVVFDGGRHVLGVIPKTLMPREITGETVGEVRAVSGMHQRKAEMSRQADAFIALPGGYGTLEELLEVITWAQLGIHDKPVGLLNVDGYYNSLLSFMDKAVDEGFITPAARHIIVSAHTAQDLMCKLEEYIPEHCGVAPKQSWEMDQQLI*
>comp32955_c0_seq1
MELGMILTNMSEMVRIVTSQRKKWTTTLLFKLLLLHKKMKEPKKPNKNNNKASEKVGYFISFSRWLVRFIIIS*
>comp23347_c0_seq1
MRLFLCFLRHFSHTDDLSISFLETKVLVSFSSSIAIGNYFWRGKLIFPINNQT*
>comp395727_c0_seq1
FYLTFSRVSFLGFCISISTEVFILHLIVLASLLIRVQKSIYLKIDLLIIKEEEEEDRSTSTSPP*
>comp48057_c0_seq2
MKVLAILLVSVYLFTSEVESRHGKVHVEVFYESGNPLFEIFFRSLKPLAEHLRDYMETDLNVLSSYALSDGKPNCQYNINKCKYDFIQACALDRMKGKSSADRVLMANCFMQGGRHVPEITGPLCSKQFGLDWDDVLGCSEGVEGMKLMKKFKEKNRNPYHGISSVYVDGKPLGHWNQLKTTVCSEIFKYNLKPKTCDYLYYTIPGNLDKINGVLKKQKPRRGFYKHKSWTGFDKQKSW*
>comp38938_c1_seq1
MLDCQGDRSLLSCHVLLFC*KVTRILFIDGQVLPK*LLNLQLSASYTLITILVCR*IHCY*IC*NLFSFCAVNAVGSKTR*VISYLI*HIN*SIFTAFSSDNL*SSK*ETS*SHNL
>comp58506_c1_seq1
MPLILKNNNNASSTSLFSIPTLFLFFTLLCILSLGFFFSSTTTTTTSGGARSRVVAVVATVRAPPSHDDSPPRDSVEEQSQV*
>comp58385_c0_seq1
MPLILKVAFVLLNLMILYSKQIKLTNIFHWTWKAHLTV*
>comp202467_c0_seq1
MIFFFPTYQISGHIHVS
>comp553_c0_seq1
MLIQYFSSIHFFFMHFVETLFNSRFLPHWIA*
>comp39158_c0_seq1
MVMNSLLSMFFFLFTFFSFNPVSSFASQLSYKDHCASIVPESTPNELGLNSFPLGYHHTGYYTGGDRIIDVGPSWNRSYFFYLLIRNIRATQVSGLFKIEGTVSFRRTNAFYYHVGNLSYGDRSNYGTQRHYRRGYLTFKLDGFWAESSGKVCMVGTGSGYSKRGNSLNLDAVFKLNNVFNASDISSLVSGSLESLSSQKEESYFEPVSVLMFPKANYNYTLHSIEADNECSSGSDVEQGLSLKNSLSLCSSGLSRVIRRLQLEYSRDCNSSKNCTPVSGISEHLPSLMSLKDIECSLTKKHMLRVLVGFSDISFSEINPGFNPTTMLVGEGWWDEKKNRLCVVACHIMGMASSSAGTHVGDCSIRLRLKFPSIWSIKDTSSIVGQIWTNKTVTDPGYFKRITFRNYEDPGVEFQGLKYEYSQLDRVKHSCPIHKPAKNQGKRYPDAYSYNMRFDMSVGDSNRRVAWGYSAPLSVGDQFYELGLPTASDSISNSSSAVTIVNFNSSSLFNISYKISISDSLMSNLTIDDRNSLFNMSSQRVKISAEGIYNAGAGTLCMVGCRDLPSNSGTPIAHSVDCEILVKFQFPPLDTNNGSYIKGSIESTRNKSDPLYFKSLDLSSAAFYQAVAEEIVWRMDMEVIMVLISTTLACVFVGLQLYHVKRHPNVLPFISLIMMSILTLGHMIPLVLNFEALFAQNPNKYFVFGNVAWLEVNEITIRLITMVAFLLQFRLLQLTWSARKTEGSKKGLWVAERKAAYVTLPLYAAGLLIALLLKLKKDGDKDPMLAPVYLHTSSWEDFKSYGGLVLDGFLLPQVMLNLFSNLRENVLSCSFYFGTTFVRLLPHAYDLYRTHNYYVSQDSGSYLYADPSADFYSTAWDIAIPLGGILFAVIIYLQQRFGAHCILPRRFKGSVLYEKVPVVTEPEAEIETTNM*
>comp34343_c0_seq1
MIYPKIPYFLLIFNHRLKVKVSSNSLTSQTYRTKDIILKFLPSH*
>comp182415_c0_seq1
MNIGTQHPYLNHLTNTCNKFIILNPQIYNWALPPFRIFLHPEKIS*
>comp35802_c0_seq1
VSSQTKQIQIQLNKVSIVKNNWSVNCKSA*
>comp54146_c4_seq2
MDDNDFQNTRYTVSLPSSNMPEL
>comp50829_c0_seq1
MDFQKKRVQLLLFVAGIIVLSITAEKCRHLVGEEGSSQSGKFTLLNCFDMGSGTLACAVKEGVKLYFYNIRSAHVEKARHRGIESALVDALSQGMSPTDSAKHAQKEGKKAAKLASRQAKRIIGPIISSGWDFFEAIYYGGTVTEGFLRGSGTLFGAYAGGFLGEQRLGRFGYLVGSHMGSWVGGRIGLMLYDVANGVHFLLGFVQTGGSEVQETSAHEKSEDPESSSYYETPVYDSSEGSSVYESSATEESNEYESSVDQSYETYEYSELR*
>comp56264_c2_seq1
MMLIDTIVMSLSAIFLMFPCIFRMTCSLCRQFYLYYSLFEVFAHIHYSIDLLF*
>comp54138_c0_seq1
MADSGSSTSPTEKYKKATSSFFSSPRLFTNFTSKGFHETETMMSPTSILDTKPFSGFKNPFWSETNSPRTPGGEHKRYWDKLDSKGVGLGLVDALVDEKPGEVTSKPESRKVLLGSQLKIQIPPLPPATLSPSESPKSRGEFNIKTRNSQLGSSSGSFSPSPVGKCASGYAYSALENSNSPRVFTGCLSASEMELSEDYTRVISYGPNPRTTHIFDNCIIESSCFDVGCSASAKEKGCLRGHTSYPSESFLSFCFHCKKNLGQGQDIYMYRGERAFCSHECRLEGMSKLEAEEVYGI*
>comp35156_c0_seq2
MGPCRLFTGQTLKMMLNYHLCRKITVQ*
>comp59936_c0_seq5
MLSIFKHFLAG*QIC*LHR*FCNTIVAINCKITQAYGIHVLYLLNVALEKAKAILQH*FVR*KLTSVSVFPYS*VIYRRFSPSSRKPSVKEIKQRRTVEAQAKYERLLGGSEANFALVELSKEGRGDDTSTVKLLDLIRGHHFNGPSSHLFSGMVQFQISFYHQNFFMV*
>comp44602_c0_seq2
LPFIIWSGQTNVLRYLGLVLLFPSLLVILSKHSVAHIIAHPTHDSVAATHQNLWTIWHSFTLRVVEGRFNTILVQVFYWALLNHVSASHAECCNNLLHNYV*
>comp56876_c0_seq2
MAEVNESVRNTLVVRKPCFGLPTGCPQCLSSYIYLKFAHLPFHLDFHLNYPDSDQIPYFEVGDYVAYNNEKEGIIECLKKDVGVVDLDNGVSSLPDWIPTKAMLTTWLADALEYELWVGCEGSSAYSIYYSDLPWPIGKVLFWKKAEWVKQKHGITNDSAKVKEEEIYGRANSAYGALSTWLGEQNYLFENRPSSLDAIFLAHGLVVLQALPESSMLRIKFLEHANLVRYVQQCKTELIEAGTSPSSDLQFHTDASSSASRGRSTWSSKPKSKPKREKTKEEKTFKRRAKYFVVAQLVAVVLFLTLMTTFDDAEVEVDDGDGGYGYDE*
>comp350163_c0_seq1
MQARMYTAKLTKWFVFSFHIHLMQCVGPRHFFTG*
>comp58290_c0_seq3
MATSFPISVTAAQVGTYFVGQYYQVLQNQPEFVHQFYSDASTMLRIDGNAREAATAMLQIHALIMSLSYTGIEIKTAHSLESWSGGVVVMVSGSVQIKDYNLRRKFMQTFFLAPQEKGFFVLNDIFHFVEEDPVHHHQAVLLAQSNLDLKLNAQSTINKPVSNYQLGGDIQAREFVATNEVKENGVMDNYGFSEQQMQRVPDSEHIGEDNAAEESNGSLQSTVNAVHDHVPASAEESAEEPQKHTYASILRVAKGQSTPSVASQPSQKNVSSSEWDHAPQTSSQQTTASANAFERSETDAVEEVPATEDEDEIKSVYVRNLSPTVSPSEIEEEFKNFGRIRPDGVVIRSRKDVGVCYAFVEFEDMTGVHNAVKEGSVEVAGRQVYIEERRPNSNIPSRGGRRGRGRASYQSEAQRGRFSSRSFGRGSGQDGGEREYNKPRGNGFYRPSPRQERGYSGHQVPRNGHNPAESTF*
>comp32308_c0_seq1
MEKRIGKGHRLVLMMSPLQGHITPLLQLADILYSKGFSITIIHTIFNSPDPSGYPHFTFHAIPDGLSETEASTSDPIHLTDLINIRCATPLKDCLAMLLSDDASHSQSQEPILCFIADAALHFTQAVCNSFQLPRLVLRTGGASSFIVFASFPLLRERGYLPIQESRLEEPVVELPPLKVKDLPKIETSDPEAFYKLVCRFVDECKASSGVIWNSFEELESSAVAKLRQEFPIPIYPIGPFHKHFPAGSTSSTSLLTPDKSCMSWLDRQEHKSVVYVSFGSIAAISEAEFLEIAWGLANSKQPFLWVIRPGLIRGSEWLELLPSGFLENLGGRYYIVKWAPQEQVLSHPAVGAFWTHNGWNSTLESICEGVPMICMPCFADQKVNAKYVSDVWKVGVKLQNQLERGEIEKTIRKLMAGDEGNKIREIILNLKEKANLCLKEGGSSYCSLDGLVSDILSLKSSTSRAH*
>comp53808_c0_seq1
MKPQQLIELAWGLANSKKIFLWVIRPDLVEGEASIVPPEIVAETKDRGLMVSWCPQEQVLKHPAVSGFLTHCGWNSTLESISNGVPLICCPFFNDQTLNCRYICAEWAFGMEMDSDNVKRDEVEKLVRGLIQGEEGKKMKKKAIEWKRMAEQATNTNGSSFLNLEKLVNEVLLSKS*
>comp234638_c0_seq1
MHNNYVKMPVCQAQHIACRIKPISFNIYGNKAAVKDETDENFETV*
>comp33806_c0_seq1
MVLSFFKKSITQLRFQASATKKILLFGGMNENALKGDICMKCSTSKVEPIRARGKE*
>comp57742_c0_seq4
MENDRSWEQNTLISELIHGMEVARKLKEDLRTPYSVETKDLLVRRILSSYEKALLILRWNASTSKSQTMRHATATFSPESPISVNGCPQREDIDETLKDHQELKHESKKRKIMPKWIDHIRVSSETGLEGPHEDGYNWRKYGQKDILGAKYPRSYYRCTFRNTRGCWATKQVQRSDEDPTVFDITYRGRHACSQGNNGVLPPKSPDKQEKPYSHDSDIHHAQPSQESRINYENILTVNTDKLGNEEMAYPFSFPSTSFGCMPQENHSLLPSALENDSFFSSLFQTHLLSPNTPESNYFPSPSFQINKFDGVYNNPYSESDITEIISTNTSATNSPFPDFNFTPDPVEIDPNFPFNTPGFFS*
>comp37001_c1_seq1
MIFDLGGPGCNCWSRLAHWILSASSIGAQPR*
>comp53322_c0_seq1
MHTLSTWPSKANRWVVPPVGSEIGSSCAIGPTRKRRMKLGPDFSFSPCTSIGVFQCSRNSTGYGSCGNSKFDLRCGFLVGYTELKFVPPFKPNKSHAGNLVPLVRALEEQAIGNELTKEETTSIHQIDSEAEGINSSNLDEVQDNKYEEKMHGDDNSGEDEKEEYDIKIDVRELAMSLQSAKTAEEVGEILKDMGELPLQVYSTIIRGFGMDKRMDSAWILLDWMKRRKIETNGSFGPNLFIYNSLLGAVKQSEQFAEMETILNEMARDGITNNVVTYNALMAIYIEKGEGDEALNILEEIYRNDLTPSPVSYSQALLAYRRMEDGNGALNFFIQFREKYRQGDIGKDDDEEDWEKEFIKLEKFTIRVCYQVMRRWLVSRDNLSKNVLKFLDDMDNAGIPLGQAELERLVWACTREDHYTVSKELYKQIRERYSEISLSVCNHVIWLMGKAKKWWAALEIYEDLLDKGPKPNNLSYELIMSHFNILLSAAKKKGIWRWGVRLLNKMEAKGLKPGSKEWNSVLVACSKASETTAAVQIFKRMVENGEKPTIISYGALLSALEKGKLYDEALRVWNHMVKVGVEPNAYAYTIMASIYTAQGNFNRVDAIIREMVTLGIELTIVTYNAIISGCARNGMSSAAYEWFHRIKVQNISPNEITYEMLIEALANDGKPRLAYELYMRAHNEGLILSSKAYDAVVRSSEAYGATIDSGVLGPRPADKKKKVQIRKTLTEFYNMADVPRRSKPFDRREIYYSQTQESQ*
>comp35873_c0_seq1
METLATSASATLTSSSSSPFSISPTIRRSLSPKTLHFRIPSKRDDRDSNSQSDSKEINNNNLLPILSDQSLSLSPLSKDAAMGLVLNAAVGRGWTTDSGMEGPSVPAGGRDNELGTENISTFPWSLFTKSPRRRMLVAFTCTICGQRTTRAINPHAYTDGTVFVQCCGCNAYHKLVDHLNLFQETNCYLNSSFNYRGHGWDDLKLRYMDIDNNNDDNFPIS*
>comp156628_c0_seq1
MLTLCKVVCSCKFKVVFRALLCIASFIHCPFFGFRSKLTVADVFHIQMGLYKRW
>comp26188_c0_seq1
MAPCHSTTAEKDHSCSSFRRRTSTKLKEYRGRFYILRRCLVMLLCWHKYG*
>comp41573_c0_seq1
MIPPINSHQCFLLWSPVALFEAQQLSVEFDWLG*PPFLPCLCERVPQFLKVAQSDHLGCQTGHVWSTIAGCSPFNSCCITIVSGHSSFSDG*RLHFEAARSQSVKLGSWVRLSPRPNPNRGVC*T*PMSA*
>comp5193_c0_seq2
MCYIVTDCTNDSLQGLDGSELEYGCTTMGFMASLSLCQIWAKKVDGGKDPFPHHLAMALFQIKRRKPTPQAISMYASVLQKCHESKDHSYID*
>comp56228_c1_seq1
MVGPSADAPSSKSTLKFLCSYGGKILPRYPDGKLRYLGGHTRVLALPRSIPFSELMVKLGELCGSPVSHLRCQLPTEDLDALVSITSDEDLANLIEEYDHFASLKIRAFLSSLSKSSSSSSS
>comp51020_c0_seq1
MSNMVEVRVPNLDCEGCASKLKKALLKLKGVDEVEVEMEAQKITVRGYGLEEKKVLKAIKRAGKAAEPWPFPGHAHFASFYKYPSYIVNHYYDAYKSEATTGVHTFFHTPSVYSVAVASDEAFASLFSDDNPHACTIM*
>comp48879_c0_seq1
MTKRTKKAGIVGKYGTRYGASLRKQIKKMEVSQHSKFFCEFCGKYAVKRKAVGIWGCKDCGKVKAGGAYTLNTASAVTVRSTIRRLREQTEG*
>comp36169_c0_seq1
MSLQRFPKSAFLGNNISLGSSPAITVAPPASEPSSKSKKHGRLGETALLGIIVAGAVLGLLAFIFFIFVCCSRRRHEDAFSGKLQKGEMSP
>comp31230_c0_seq1
MEPVHSPLTFRPSSHLVTEPGMGVLYYIEFQEYLNFAS*
>comp4452_c0_seq1
MCKVLLFASIFNLPKFLLWNYNFYCHFEVFCAPRYFREQ*
>comp37736_c0_seq1
EFQVSGGYYVFYPFYLSQDINLLILNFSVFAWIYHAFSFVGPLNWHCKVHAIDSFPQQCKFQKRHSIKQQLRQCVNSDPGKDGLTVLRDIGDPYHENCCFLCIYF*
>comp56869_c0_seq2
MIEVRSCVEMRHLKKLQMKTLVFLFSSPRASHRSYNSNNYPLIPLFHQPSYSITSFSSQVHKDSIFIPPTKTHLYASFFCTLIRLYLACGRFCIASNAFFCMRGLGLVPVLPLWNKLLYQFNATGLVSQVRVLYSEMVSCGVVPDVFSVNILVHSLCKMGDLDLALGYLRNNDIDTVTYNTVIWGFCEQGFTDQGFGLLSEMVKKGICVDSVTCNILVKGYCRIGLVQYAEWVMYNLVDGGIPQDIIGLNTLIDGYCEAGLLNHALALMENGGRGGLMADIVTYNTFLKAFCKMGDLVRAESLLNEILGFQRDKESGQFENYVVESQAEIRDLRPTLATYTTLITAYCKHHGIEESLSLYEKMIMNGIMPDVVTCSSILYGLCRHGKLTEAALLLREMYKMGLDPNHVSYSTVINSLFKSGRVVEAFNHQGQMVVRGISFDLVVCTTIMDGLFKVGKCKEAEEMFQTILKLNLVPNHVTYLALLDGYCKLGDMDCAELVLQKMEKEHILPNVITFSSIINGYAKKGMLSKAVDVLRKMVQWNIMPNAFVYAILIDGYFRAGEQEAAIGFYKEMESWGLEENNIIFDVFLNNLKRVGRMEEAKSLIKDMCSRGLYPDVVNYTSLIDGYFKEGNESAALSIVQEMTEKNTRFDVVAYNALIKGLLRLGKYEPQSVFSRMIELGLAPDCATYNTIINTYCIKGDIENALDLLNEMKSYGIMPNAVTYNILIGGLCKTGAIEKAMDVLNEMLVMGFVPVPITHKFLLKAYSRSKKADAILKIHEKLVSMGLKLDQTVYNTLITALCRLGMTRKANVVLDEMVTRGILADIVTYNALIRGYCIGSHVEKAFTTYSQMLVDGISPNITTYNTLLEGLSTAGLMREADKLVSEMKERGLVPNATTYNILVSGHGRVGNKKDSLKLYCEMITKGFVPNTGTYNVLINDYAKAGKMRQARELLNEMLARGRIPNSSTYDILICGWCKLSNQLELERALRLSYRTEAKKLLREMCEKGHVPSESTLLYISSHFSIPGKKAEAQRLLKLLTQKKNV*
>comp32230_c2_seq1
MQLNIGSVAGMTSKKSFKLWGTVLGKRVLVLVDSGASHNFISSDVVDYIGVKFEVTEEFVVEVGDGHKVNNRRVCRNMELQLPNLKVVHDFYVFKLGGVDVVLGYEWLAGLGKIKADFGEHVIWVRDKRKKVEIRGDPQLSCTLVSAKAMVRELVKGVEAYYVELGVMSKEEQGVLEGAQEVEAVLEEYADLFREASEMPPKRWCDHSIVIKAGAQIPNIRPYRYPHHQKDAIEPLIALLLPTSSLFLP*
>comp280381_c0_seq1
MHFLYVEIKKGFLLAAIANYMILDNLFMDLQGYYLTYEQIITEKVKLRKAIYGI*
>comp57051_c0_seq5
MALRFLCTTKISTQDHAKVDLRNTKKCPQNVKSLVTTVGLPSIKSTPLESLQSGNWVKLICGASFEDVVDIRNLSLVYTLAGVDCIDCAADGSVVSAVNEGIEAARNIVCLRRPWVMISVNDDKDLHFRKAEFDPEDCPADCSRPCEIVCPANAISFQGKSTLGISYNTETPRVPKDGVITERCYGCGRCLPVCPYDKIREVTYVRDAVTTAELIKRNDVDAMEIHTSGRQSTLFKELWCALGDSVGYLRLIAVSLPNGGDSTISSMNQMFSIMKPNLRSFNLWQLDGRPMSGDIGRGATKESIAFAVQLAKAKERPPGFLQLAGGTNAHTIDGLKKEGLFQITSINNYSDDETSTISSSNSSHALIGGIAYGGYARKIVGRVLRSMQSQHGGAAPIEDHPEHLLMALREALALVGPVKCL*
>comp57574_c1_seq1
MLVFAESSDDRCHQKKVCGVVLLLFLCFEVHLSWCASAVLQSGIK
>comp24150_c0_seq1
MDWSPQFPELLVASYQNNPDSPNDPDGVCLVWNTKFKKTTPEYIFHCQSPVMAASFARFHPNLILGGTYSGQIVVWDNRVQKRTPIQRTPLSAA
>comp165805_c0_seq1
MSLVVPEKFQHILRVMSTNIDGRKRITYALTAIKGCGRRFAFLVCRKADVDPNKRAGELSEEEVDKLVTILTNPLQYKIPTWFLNRQRDIKDGKNSQVVANVLEVKLREDLEMLKKIRAHRGLRHYWGLRVRGQHTKTTGRRGRTVGVSKKKGG*
>comp515837_c0_seq1
MAIIKSFWVLATTLTSMLMATVMDLSSLANEPALRRLA*
>comp26477_c0_seq1
MARNAEKAMTTLARWRAAQLGEGEVQKARRPFLASECLDLPQAEKWRMQIIREIARKVSQIQNAGLGEFRIRDLNDEINKLLREKGHWEAQIRELGGPDYSRSGPKMLDHEGKEVLGNRGYKYFGAARQLPGVRELFEQAPPPPPHKTRGELMRDIDASYYGYMDDDDGILKPLEEEEE
>comp235101_c0_seq1
M**TDNVVIKYQRRVQFENRTKET*ITFLNTKL*IKHDITKS*TCILCKTKRVEVAREVQIDEHQILNEVEVIPVSSWINAKDGVIREISSHKILSVS*YKAHYATYNNFKSLRNRTSMQCIY*
>comp299205_c0_seq1
MSRNGSWSSGGGGGGHNIHMRGLPFRATQSDIAEFFRPLVPVSIRLVYDNSGRASGEADVEFASHDDAVKAMSKDKSNMQHRYIELFLNSSPSPPMGGGGGGGFSSMGGGGGGFGGGSGGFGE
>comp41935_c1_seq1
MPRRYSDYPDSFYLWNLFSSMGSLLSIFRLVLFCGIIWESFRAKSLSFSFLSSSATEPMETFPIMDHTIE
>comp204501_c0_seq1
MLHFNLAFLYCLYLSNFSRPLFSLSNF*
>comp14411_c0_seq1
MLNALMKYGNLRLDNFIILEIVKRSVFALLRAITTRFVLFGAHVAYQLFLCDKHKVHYFASCRP*
>comp4069_c0_seq1
MQFSFAYTCPFSVSQIFLFMPVFFLFLLCGEPICLYDWLKLYKSVNFCLYVSM*
>comp179741_c0_seq1
MGFSPAVSHQKIIIIYYRLIVAFRGNVLGKFSIASVQNIFLVAIL*
>comp255917_c0_seq1
LNITYKFSYTLAQSPRRYKRNIHHIFEKPFQVFIIRNYLIN*
>comp38466_c0_seq1
MFGVSSQHLRHYTFSASLHTYASSFVFYLICIC*
>comp11186_c0_seq1
QQHCLGICANSNYIICEKRGKRINDGHG*
>comp232929_c0_seq1
MTTTPCISSPFPARTMDSSSIYTEKCGRIQPDSGRMTKTGKRREIRDPTLTIIKG*
>comp348401_c0_seq1
MRGGMGYGGMRSGPYDRTGPYGRPDSYGRPEPYGRPDFDRRPGPIPAGPGPMPAGPGPVPPAAPAMAAMRNGYYDDRRDGAYMDRSADYMDRRERDSGYGMDRG
>comp50615_c0_seq1
MKRTMPWSDDDDDSSPDESSSLHSDSEHDSQTGEKKSTGKCRKQKSAAIDFEALRRHGYKGGPSVLKVPPPKEGDDTKQDWTWSTGKEKRVNKEIEESYEQRQKTREAISVGEQLSTAQTRNEKKNLSFSQKEKRKRELGQASRGKNYVEEEKRLLRESGVYSGFDA*
>comp55671_c1_seq3
MCVEAFKIWGAGVVSYFKTLISLFSVCANSLVLRKEKEIHRYAVRSGIDRKEFLATALVEMYMKYGHVSWARGVFDQFIAKSDDHAFWNAMKGGYGRNGDYESAFEMIPLYSSVLIRQWDPGVSNILMVVTVHEYCWRSFPTFHSLLNFVYDRGKIWGILYDVRHHKLDATTGPLKICKRRLLSELMGQAQVYQYMNCNGKIENDIWSSSMLV
>comp36278_c0_seq1
MEGHHLHHQRQQKQQQQQPHNISVNVDVTDRFPQWSIQETKEFLVIRAELDQTFMETKRNKQLWEVISNGMKEKGYHRSAEQCKCKWKNLVTRYKGCETMEPEGLRQQFPFYNELQAIFTARMQRMLWAEAEGGSKKKAMQLSSEDEDDGNEESEGDHKGSSRKKKKGKMVGGGSGSASRSSLNNLKEILEEFMRQQIQMEAQWMEAFEARENERRLKEMEWRQTMEALENERIMMDQRWREREEQRRIREEARADKRDVLITALLNKLRREEM*
>comp55100_c0_seq1
MMIKFGLLLLGLAALSAAQRKNVTLSGDKWSWVIENSSGFNYFRRDASWAITTDQDSTIKLICNEIILPERIGQNCTRGQVVFNDGFKTITYCGSSENVLIQGNSSQLLVDIVIPPSSGGVFYCKGKSVHPPRNIETIQVAAGETIRVKYPEILEKDNDKAFVFNSTTGSPITLNCTKKMERPLRSGQCVKDILTVNARNGTQVSCGTGHVNATGTEITMRVETFQATRGHVQCVVKG*
>comp415394_c0_seq1
MEYHDEVVDNFIEESAGQYLSHKQIASKDNTPESHARNLAVQLCLVKKCDYFFTVDSLAHLDNPDTMQNLLQARKRFVAPMLVRPNKAWSNFWGDLSPQGYYARSLDYMEIVNSERRGLWNVPYVSSCYLIHKEVISKIKGAFTQENYDPDMSLAKN
>comp51141_c2_seq1
MAAEEEEEEALAEVEAVQAVYGTDCLVLGSFPPHFHISLKPRTADVSSEQFVEAIVEIRASPQYPKEPPCVDLVDSKGLDEQRQKHLLDYIQSKACELSPCLMLVALCEEAVEKLSAMNHPDGDCPLCLFPLVPEDQQSETFPFMKLMSCFHCFHCECVIRWWNWIKKSKETDSAYSASATAHPNQDMETWKDNYDKMEEGVGNCPVCRKPFHAKDLEHVLDLVGSHSSQLCLVQCSKETYLKWQEPIYSFQRWKSFSCHKLFQPAF*
>comp57475_c0_seq3
MEDNSSSSNKMYNLFVKHLDGKTLTLLFPSPILYANSIKDRVFELTGIPPQQQRLVTGIRQLNDDKSEIRCSPEGDNVFPSVRLLLRLKGGKGGFGSLLRGAGTKAGQKKTNNFDACRDMSGRRLRHVNAEKRLEEWKAGEEERKLEKVAEEFLKKQTKKGMKVLGDGDAHKYVAKYREQSERCVAEVALSVKEALMSFSVNGKRKGSKDKTDAKKLKIWMGKRKLNGSDSDDTDEDENDDEGENEKSILLNSQNESDSNKVEGSSGSVTGKKQDGESSGAGSCESGSEEEKETVVEGKVESVGSQSSETIQAEPSVAVEPVIYDETTKATAMPCSESVDSGFNAEDNGYQDCNGAVSDKFDVAVSEASNIMSSENVADASKLNDMEIDGSLEHKTSVHQETSPSTSVPALEEPLNFDTFNSAAELEVLGMERLKSELQSRGLKCGGTLQERAARLFLLKSTPLDKLPKKLLAKK*
>comp14144_c0_seq1
MYRVFVTYWTYLCQHF*RSLSNGIILSCRHEGSSNL*YLLQSIAE*VLTVHTKLNYNRTR*FQTLI*YILAVRMFCCVNIVRIRTSMYV*
>comp41082_c0_seq1
MDRGSEIEDQAFTIRAMQQQFERMNVMFGEIRDRMDRQDTTIANLQPHERGRNRRATVDEEDDSDLADSEDHSNLARGNRRARNVDHDMRSIKMKLPSFQGKNDPEVYLEWEKKVELVFECHNYSEEKKVKLATVEFTDYAIIWWDQLVLNRRRNHERPVRSWEEMKAIMRKRFIPSHYYRDLYQKVQGLTQGLMSVENYHKEMEIAMIRANVEEDREATMARFLHGLNRDIANIVELQHYVEIEDMVHMAMKVERQLKRKGSSRFNSGSSSWKPNKEKETFSKPRVEYPKAPREGDHQVKTKPDAQPSR
>comp37533_c0_seq1
MMAENISHGLLLRKVPVLQYLYYLAQIGIAMSPLSNNSLFLNYHRNPLPEYLARGLCVSLSTDDPLQFHFTKEPLMEEYSIAAQVWKLSSCDMCELARNSVLMSGFPHEMKQYWLGPNYTKEGVAGNDISRTNVPDVRVAFRTETLLDELSNIFKGVEKEEAL*
>comp21327_c0_seq1
MSAEKLPPRNRSLPATIYQGSNVQRQGFVFMKSGVQTFAKLHCLKAVSFIHNLTIMPSLD
>comp145032_c0_seq1
MAMHINLKSIRMLFIPFSQSITHCIYWAKLHS*
>comp46358_c0_seq1
MCGFMASLEKNLTLLTCYQYYFCIIS*
>comp31301_c0_seq1
MISTTQLHILGKRTQHKRNQKTNGVESSSCEL*
>comp430205_c0_seq1
MRFTQPNAFSSAKMGISNLRQRSSQYFPLESCYDPSLSSDAPWVRFRALWSRLHWDSRFVRVSNNSSILVNRASCISLCNSSSLASMLFSNASNR
>comp104075_c0_seq1
MHFYLALHLINSTDFYAELKSIGYCVIHTTNKDRV*
>comp17680_c0_seq1
MVVAPELFSKERARIALENTKVLVGPLGMKTLDPSDLAYFGDYDNSNNSADSRVAHGFNYHQGPEWVWPVGYYLMAKLRFSSEPEKTKLEIEKYLSTHW
>comp285979_c0_seq1
MDNICLRLECVYFRSLPKLKSIHKTTLPFRSLKYVQINECPNLNKLPFDSSSTTKDNLISLREIRGSQDWRRNLEWETPATEDILRSKVT
>comp214786_c0_seq1
SGFIYSNLKFVRKWKFFCALGHDL*
>comp22948_c0_seq1
MEVVEGFMKSLTKGTDELLLSATVKDHNEFFEQQKNFLIEYHNHLKEATAKADRMTARHKDVADNFVKLSMTLTQMATTEHSDLEKFLTKVADTFEKVRKTEARVASDEDLKLSDTLRYYMRDTFAAKRLLYKRLRCLSNYEAANRNLEKARAKNKDIVAAETAQQMACEKFEQMSEKGKEELVDFKARRVAAFRKNLVDLAELEIKHAKTEVQILKSCIASLKNEE*
>comp47844_c0_seq1
MNSSGLGGGFLSGPGPSGGILDLESPFHRHQQTQLGHASVTSQQQHMNIMSGLDNDHPIGLMEVKGSNAALNFGKGKAIATSNPTNSNDLSEDDDPSYAEDGNCENFDVGKSKKGSPWQRMKWTDNVVRLLIAVVSCVGDDGTIDGMDGLKRKPGILPKKGKWKTVSKIIISKGCHVSPQQCEDKFNDLNKRYKRLNDILGRGTCCRVVENPALMDSMPNLSAKVKDDVRKILSSKHLFYKEMCAYHNGQKIPDCHDLDLKGYSLQHGRDSRDNNGSEEEAEDNNESEDDELDNEGNINAHGDGERMEGFCDRKKLREEDAHFWPQSDGLDKFEVEMARIFQDPTKSLWERREWIKIQMLQLQEQKVSYQAQTLELEKQRFKWLRYCSKKDRELERLRLENERMKLENERRVLKLKQKEHETDFSRSEMPLDPASLGINRPQGREHINLGRQQ*
>comp44251_c0_seq1
MRLMLLVRAYQVNGHMKAKLDPLGLEEREIPDELDPALYGFTEADLDREFFLGVWRMSGFLSENRPVQTLRSILTRLEQAYCGSIGYEYMH
>comp35348_c0_seq1
MS*VHSLFQLQVILCSYSCSYPIYHLINNNFPFG*H*TPRFPILLFAKLLYYQKKSKINTSIKIAFIRA*FLV*VFLKLSSRLWMDDLHI*
>comp60022_c1_seq1
MVPIGHFHFPFIIFLSPKQREFSFSILFPSIPPLPLIQTNSKTALFLC*
>comp49995_c0_seq2
MARNGASSVPAFRVLTLLLVLLHLLLHLRRISASHDYPDALRKSILFFEGQRSGKLPTDQRLRWRRDSALRDGATAGVDLSGGYYDAGDNIKFGFPMAFTTTMLSWSVIDFGRSMGPEVGNAVSAVRWGTDYLLKATAKPGVVFVQVGDPYSDHNCWERPEDMDTMRTVYEIDGSHPGSDVAGETAAALAAASIVFRSRDPSYSRLLLNRAVTVFQFADRHRGAYSNSLRRAVCPFYCDVNGYQDELLWAAAWLHKASRRRQYREYIVRNEVVLRAGDTINEFGWDNKHAGINVLISKEVLMGRANYFASFKQNADGFICSILPGISHAQVQYSPGGLIFKAGGSNMQHVTSLSFLVLAYSNYLSHANKVVPCGETTATPALLKRLAKRQVDYILGDNPLGMSYMVGYGARYPQRIHHRASSLPSVATHPAHIGCKAGSRYFLSPNPNPNVLVGAVVGGPTNSTDAFPDSRPFFQESEPTTYINAPLVGLLAFFSAHP*
>comp45440_c1_seq1
MYSQMFKSVCPKSYSYAFDDATSTFTCTAADYTVTFCPSSFPSLKSLTDSGPGSSVEQAALATSSWLANLATGASTKSQPFAASKSAFFVAVFFTLSHLVS*
>comp59090_c0_seq3
MHIGKFKKININKRIQNVGRKETLKYNLRNKISIYSLTQVMTGRNTQKEPEKTSLIYSAT*
>comp53410_c1_seq1
SFRIQSGKFCLVSVCVYAHIFYNHYYACSLLLSQPFYVSHFFEPPQILRKLLFL*
>comp50630_c0_seq4
MAPHGVGTTLTTTQERFSGNPMVKLSLWLEVLLVRILKGKKDSTAMQRNGKNKKRDA*
>comp44270_c0_seq1
MDQLKYQNIAALTQSIKAHHYLIKLTQLFVSVSVCSFIFPPSSLLVFLHYFKFYFSTFPFQLFTHNIDKNCMFLLCNGLLVFVGITRSFSGSSSDDEPSTYIEDGSQSQFPDVEANEPMLEKEAAEKTSEPDEQNNAAEQAIEIKYCVEEVQENIEKIILLDEEQGKGSSQSVLKEEKEPDEETGLFDAGDEEEDNGSEIDYFLIEENVEEEEDVEEENCMLSTEELNKKFDDFIRRMKEDLRIEAQRQLVMV*
>comp47734_c0_seq1
LELSCLICKSNSKCSSSNFPLLLLLLFYVIKKLVYTYILLQTAILNI*
>comp36752_c1_seq1
MPNPRLLKYPLLLIPKNQVHRLILLRELV*
>comp3347_c0_seq1
MLFSIKRILSSLIPWNTIVVENTDLEVSSTNPIGICETRFIDLWEEERLVALPLSRVAQTPMYYKDN*
>comp58067_c0_seq2
MAQSKAFPAYSSPPTAPCLRRTEQLLHHQFWKAKPSSFKELGPRTSVGASKLQVIKAVLRSDTEIEISETRKGSGLRGKLNKVVLAYSGGLDTSVIVPWLRENYGCDVVCFTADVGQGIKELEGLEEKAKASGASQLVVKDLTEEFVRDYIFPCLRAGAIYERKYLLGTSMARPVIAKAMVDVAKEVGADAVSHGCTGKGNDQVRFELTFFALNPKLNVVAPWREWDITGREDAIEYAKKHNVPVPVTKKSIYSRDRNLWHLSHEGDILEDPANEPKKDMYMMSVDPEDAPDQAEYVEIGIESGLPVSVNGKSLSPASLLAELNKIGGRHGIGRIDMVENRLVGMKSRGVYETPGGTILFTAARELESLTLDRETIQVKDSLALKYAELVYAGRWFDPLRESMDAFMQKITETTTGSVTLKLYKGSVTVTGRKSPFSLYRQDISSFESGQIYDQADAAGFIRLYGLPMRVRAMLEQGI*
>comp235931_c0_seq1
MSAEEMASNEMKALRNKFIKESIDDAQLATVQGTKTDLLKCGKCKKRNCTYNQVQTRSADEPMTTFVL
>comp58869_c0_seq2
MALTLRSSISFINQKETKVLKTSDDISTTVCFAKTKPSFRLRAKNSMQEAHLTRENSFNSEVRRNEKWEKVHAPSVAHNQSDSMRVPVFVMLPLDTVTMGGNLNKARAMNASLMALKSAGVEGVMVDVWWGLVEKDGPLKYNWEAYAELVQMVQMHGLKLQVVMSFHQCGGNVGDTCSIPLPPWVLEEISKNPDLVYTDRSGRRNHEYISLGCDSMPVLRGRTPLQVYTDYMRSFRDRFRDSLGSVIVEIQVGMGPCGELRYPSYPESNGTWRFPGIGEFQCYDKYMRASLAASAEAIGKKEWGRSGPHDSGQYNQFPEDTAFFRREGTWSSEYGQFFLEWYSSTLLEHGERILASAKGIFQRSGVKLSGKIAGIHWHYRTKSHAAELTAGYYNTRFSDGYLPIARMLAKHGVVFNFTCMEMKDTEQPNHANCSPEGLVHQVKMATRAAGAELAGENALERYDADAHAQVLSTSRSNSGSGLTAFTYLRMNKKLFEGDNWRHLVEFVRSMSEGGRRQRLSDSDSHGTDLYVGHIKGSQKKQEQEVALV*
>comp368479_c0_seq1
MYGVSVGNTAWMSTDFFSQEMRAMGTMFLTCSCWGSNVIVSSTFLTQMHSLTPSGTFGFYAAVCFIGWVLIVFFYPEVSGLTIDETSQVFDQSMFKMVSFARKRRQERKDAGALVKSSANIVVGH*
>comp35688_c1_seq1
MYTFSLLQNSQGLFTNVLLLSCFVEINNHKLIIHQQFSLNN*
>comp52965_c1_seq5
MAVKAITQSQSGVDIYLYEERKMEARKGKRKITKGGERRYLQTLVIGKLIRKTQITTGTQKLVLFLCAEKTRIECECCC*
>comp509530_c0_seq1
MAFVVSSFAMPIVLARTPLKAPTIEWGAAFLTITGDIVVYITYLGFFSLVYQEDHNYAIW*
>comp477803_c0_seq1
WKENILHLRVWGWGTFPLQDSSARR*
>comp6331_c0_seq1
MMITFFQLPQSVADYYILFIICSTQTFQGKLE*
>comp32606_c0_seq1
MARSTSKDAQDLFRALWSAYSATPSNLKIIDLYVMFAVFTALIQVVYMALVGSFPFNSFLSGVLSCIGTAVLAVCLRIQVNKENKEFKDLAPERAFADFVLCNLVLHLVIMNFLG*
>comp3692_c0_seq1
MRLMHVPLCLLMILPLKLDSNFNAPMLIAYVLELCPLKNVYVLSLKAPLRCMSIFVPLKALLMSLL
>comp54814_c0_seq8
MCEINNAVHKCFDNLVSNPYSLITSTGTKNSFFPEKAEYNLLVLNNLVTTAQKDQM*HYFSFSSRKKKGHAPGQLSLIVISLKHGKRSHREMMKRFKVWVYTEGEQPLVHDGPVNNKYAIEGQFIDEMDTSNKSPFKASHPDQAHVFLLPFSVAKVIRFVYKPRRSRSDYDPDRLQRLVEDYVNVVADKYPYWNRSKGADHFLVSCHDWGPKISSANPELFKNFIRVLCNANTSEGFQPSRDVSVPEVYLPVGKLGPPNMAQHPNNRTILAFFAGGAHGNIRKKLLKRWKDKDKEVQVHEYLPKGQDYTKLMGLSKFCLCPSGHEVASPRVVEAIYAGCVPVIICHNYSLPFSDVLNWSKFSMEIPVDRIPEIKTILQNVSKDKYRDLYLNVRRVRKHFVIHRPAKPFDLMHMILHSVWLRRLNFWLIASQ*
>comp16875_c0_seq1
MFLIDSMNFKFTILLLFPLAPLVNVDKIIKLEEISHWF*
>comp58007_c3_seq1
MDYERIQKPQGGGGFSPGKLRSMLLGVEKKRKEEEELDSTFTTRSQNSDMDESGGSSSDHCKDVDVVSVLPECLTSATARTFSLEAIGDRIMKDNAAVTSRHRILDDPSLDYDNGHDNMSISSSMFEFQKAERASQRVPVGPFSKPAPSKWDDAQKWIASPTSNRPKTGQTQGQGGQVGPRKVGSLGYGSRQPSMKVVVEVPDQRAIALDEPDTKLMDTNQTKMESGGQKFVSWEADPYAIENSYVSLSQHNSSIGIQSATTFVPPPSTARSVSMRDMGTEMTPIASQEPSRTGTPVRATTPMRSPNSSLPSTPTRATPAATLTDPPSDHLNPNKNELSEKELQMKTRREIMVLGTQLGKTNIAAWASKEEEDKDASTSLKTKTVDQPAKSVIETRAAAWEEAEKAKYMARFRREEMKIQAWENHEKAKSEAEMRKIEVEVERIRSLTHDKLMNKLAAARHKAEEKRAVAEAKRNHQAAKAEEQAEYIQRTGHVPSSYLSFSCCSWCS*
>comp42690_c0_seq3
MMVGEETLKKNEEEGLEVMVNEEDDEHGSKERVLHKYFLQEWKLVKSLLDDIVSNGRVSDLSSVYKIRSIMDKYQEQGQLLEPYLESIVSPLMYIIRSRTIEIGVASDEILEIIKPISIIIYSLVTVSGYKAVIKFFPHQVSDLELAVSLLEKCHRTNSVSSLRQESTGEMEAKCVMLLWLYILVLVPFDISTVDTSIANNDNLIEFELAPLVLRIIGFCKDYLSTAGPMRTMAGLVLSRLLTRPDMPKAFMSFVEWTHEVMSSVTEDVLHHFQLLGAVEALAAIFKAGSRNLLLDVIPVVWNDTSILYKSSNAARSPLLRKYLMKLTQRIGLTALPHRLPSWRYTGRTAKLNVSLNSSRKIDQSNFAVNEDSSNSNEITDGAQDDDMDVPENVEEIIEMLLSGLRDMDTVVRWSAAKGIGRITLRLTSSLSEEILSSVLELFSPGEGDGSWHGGCLALAELARRGLLLPTSLPKVVPVVVKALHYDVRRGPHSVGSHVRDAAAYVCWAFGRAYYHTDMRNILEELAPHLLTVACYDREVNCRRAAAAAFQENVGRQGNYPHGIDIVNTADYFSLSSRVNSYLHVAVSIAQYEGYLLPFVDDLLDRKICHWDKSLRELAAEALSFLVKYDPQYFASNVMDKLIPCTLSSDLCLRHGATLATGELVLALHHCNYALPSDKQKSLAGVVPAIEKARLYRGKGGEIMRAAVSRFTECISISKVALSEKIKRSLLDTLNENFRHPNSQIQNAAVKALKHFIRAYLHASDNRGISDVTVKYLNMLTDPNVAVRRGSALAIGVLPYELLASQWRNVLLKLCGCCTIEENPEDRDAEARVNAVKGLISVCETLINGREDTAALFIENDFSLFVLIKNEVMMCLFKALDDYSVDNRGDVGSWVREAALDGLEKCTYMLCKTDKSVCLSGRSDGNEIEPVVQPLTDTMLKNNQDLLLFDENLATSLVGGICKQAVEKMDKLREAAANVLYRILYNQMIYIPYIPFREKLEEIVPKEADAKWAVPSYSYPRFVQLLQFGCYSRDVLSGLVISIGGLQDSLKKASLSALLEYLEGVESEDPNARVSKEYMLSVDILWVLQQYKKCDRVIIPTLKAIEILFSKKIFLNMEAHTPTFCAGVLDSLAIELKGSKDFSKLYAGIAILGYVASVLEPINMRRAFSQLLTFLGHRYPKIRKASAEQVYLVLLQNEHLVAEDKIEKAIEIICETCWDGDMDLAKHQRLELYETIGLGVGQFGKNSDGASRKTISKKPTDLDENASYSSLVESSGF*
>comp36863_c0_seq1
MVQHPCIVLFRPKFDMVLGEMNVLISICYKRYEQDKGLSEHIFIVVYYVT*
>comp364900_c0_seq1
FGPFSLGKRPTEGTGPFGNNCTSLYLVPIFII*
>comp43735_c0_seq1
MAAGIDMSLDDIIKRSAAASADRRRGRGRGYGPGPDRRFAVRNPAGTTPYSFPQPRQVSQSMLPEMVLDGGSGAAAETGTKLYISNLDYGVSNEDIKLLFAEEGELKRYCIHYDKSGRSKGTAEVVFMRQSDALAAIKKYNNMRLDGKPLQIELVGASLVSPAVMPIFQNSLLGRPNDVLESGRERVGGSRVHKGIARGRLPRGRGEEKGHVGKVSVRDLDDDLEKYHLEAMQLNKKQ*
>comp250906_c0_seq1
MERIMKAQALRDASTMSYMVAKKNLEINPDHPICEVLRQRADADKNDKSVKDLVMLLFDTALLCSGFSLDEPETHASRIHRMIKLGLGVDEEEVPEVEESAPAAEASSTGEASDEVNKMEEVD*
>comp5537_c0_seq1
MKNNYKFPTQLRDSLQTHHSRYHGQTYKTIKRTSLSQLGLGKFHRASYQPFI*
>comp364415_c0_seq1
MNATDILFSVILVVMLQLVFLYASFHMAQNSKWFSAADVVAITFCSTHKSLTLGIPILRILYSGYSHFSQITLP
>comp439022_c0_seq1
MVEKETDTFIKCSRTDRGGEFTSQEFTVFCKENGISRQLTAAYTPQQNGVAKRKNKTIMNMVRCMLYEKKIP
>comp50090_c1_seq1
MEDIQFQGSQEIRNKCISGCCPKNCVSSYKLGKKVVKMLNDVDELVTLGKRFDKNVDITYKPPFKLVDEMPPVETVGLDLMLNQVWNSLEDENVGIIGLYGMGGAGKTTLLKKINNEFGKRKHDFAVVLWVVVSRDCDINKIMNDIRNRLGVNDDIWNQSSPDQRVAKIYQVLKQKKFVLMLDDLCEKLELEKVGVPLPKDTNNQSKILLTTRCEDVCAKMQDQIKFKMECLLEKEAFDLFCRKVGEETLKCHGEIPTLAWEIAKECKGLPLAVITVGSAMAGVNSVEAWRQAKSDLRSSAWTASDLEEKVFSILKFSYDRLPDETHKSCFLYCALYPEDYAVTVDDLLDRWIGEGFLGKDKTKSIYDTYEQGESIIEKLKLSCLLEDADDTSFDRRAAIKMHDVIRDMALWLARDQDRNKDKVLVEGEALETSQMDSERLNVVERISITNFSGTWQVPTCPNLFSLGVRGFSIITDISNLQSMRRLKVLDISYNLDIDHLPTEICKLISLEFLNLSKTRILHELPIDFKNLKNLRVFLMENVNHDLEIIPLEVITSLERLKVFRFCKLLHVDSKQALDLSREVAFLEKLESLPELEELCIRLSTMTGMKKLLESNKLRGCLRHLMVSKFRDTLEMSSILASLSRMKHLDHISLLDVHVIMEGSSITDISHLSKLRWVRIGNCDSITHLTWLRYAPLVEFLGVYFCESIEEVVKGPEDEDEDGGTDRYNYNEIFSNLRRLHLYSLPKLKSIHKRALAFPALKYIHIEDCPNLRKLPFNSNSSKDSLIKIEGSIDWWNELEWEDTAMKDRLQSKFRTL*
>comp181027_c0_seq1
MSGRGKGGKTKGKAKTRSSRAGLQFPVGRIHRLLRKGNYAERVGAGAPVYLAAVMEYLAAEVLELAGNAARDNKKTRIIPRHLQLAIRNDEELNKLLSGVTIAQGGVLPNIQAVLLPKKTEKSS*
>comp42676_c0_seq1
MLLFLLLQTNHTSHKEGNIWYFCGFTRSKRRNIGFLFDSY
>comp29321_c0_seq1
MCCWGFINFILEVLMTIIDIDYTYADPLSFFFYNFVLLKKVPGSILLFQISSFSVIYTSKLMSKKFIGHLYHNEYTHDWP*
>comp32157_c0_seq1
WQVCGRYGFPIDKRTTVVFSGGVPNGGLGYFSSSVCVITSQSATHFSSSFTTGTLPSALIFKNLNQQNK*
>comp58438_c0_seq2
MELLNPSLPPHHHHHHKHAPTGYSFRRFSPPTILHFGFHGVASSQLPQAMEECPEKVHVAVGKSVEKAANLLQWTFTQFRNTEICIIHAYQPSPVIPTLLGKLPASQANPEVVSAFRREEREQTIRLLEKYLSICRAAKVKASIIIAEADQVQKGIVDLVIRHNIRKLVIGAVPENCMKVKRNSSKANYAAKNAPPFCEIWFVYKGKHIWTREASETPCSLSSCAHPEIAATESLRCRSFQYDKNELFHSECLQSNSARPTICSGIRSWVQGESNETEGTSSSKSSSCSSHHSPQNSAGGYLDTYSEVMEERINSQLIETKREAESATDEAFAELLKRKRLEVEAMEVIRKVNLFESAHAREVKLRKEAEDALRVTVQEQQMLLDKSEEIASELQRTMRNIALLDSRAQEANRRRDEAADELSLIQASISTLWHERQQIRRQKMEALRWLERWKSRGQVGAAHCNGVIGFAEELPELAEFSLSDLQNATCNFSESFKIAQGGYGCIYKGEMLGRTVAIKKLHPHSVQGPAEFHQEVQVLGSLQHPHLLTLLGVCPEAWSIVYEYLPNGSLQDYLFRKNNISPLTWNTRARMIAEIASALCFLHTSKPETVIHGDLKPETILLDSALSCKICEFGFCRLVTEESLYRPSFRLSTEPKGAFTYTDPEFQRTGILTTKSDIYSFGLIILQLLSGRAPVGLAVVVRKAVSCGNLSSILDSSAGEWPSAVATRLVELGLQCCQQNRRDRPELTPTLVRELEQLHVSEERPVPPFFLCPILQEIMHDPQVAEDGFTYEGDAIREWLENGHETSPMTNLKLSHLLLTPNHALRLAIQDWLCKS*
>comp58289_c0_seq1
MASQPAAQGMDERHVQKTYWIEHSADLSVEAMMLDSKASDLDKEERPEVLSLLPAYEGKSVLELGAGIGRFTGELAQKAGQLLALDFIESAIKKNESINGHHKNVKFMCADVTSPNLYISEGSIDVIFSNWLLMYLSDNEVENLAERMVKWLKVGGYIFFRESCFHQSGDSKRKYNPTHYREPRFYTKVFKECCMSDDTGNSFELSLVSCKCIGAYVRNKKNQNQICWIWQKVRSQDDRGFQRFLDRVEYNHKSILRYEHVYGQGFVSTGGIETTKEFVAKLGLKPGQKVLDVGCGVGGGDFYMAENFDVEVVGIDLSINMISLAIERAIGLKYTVEFECADCTKKTYPEKTFDVIYTRDAMLHIKDKPTLFRSFYKWLKPGGKLLVTDYCKSAGSPSLEFAEYIKKGEYYIHDMKAYDQMLKNAGFDDVIAEDRTDLFVKTLQQELNALENKKDDFIHDFSEEDYNEIVERWKAKQIRGASGEHVWGLFIAKKK*
>comp60011_c0_seq4
MAEKYVENSGPSPTPSWFTPKRLLIIFCVVNTLNYVDRGAIASNGVNGSLATCTDSGICTSGSGIQGDFNLSNFQDGVLSSAFMVGLLIASPIFASLAKSHNPFRLIGVGLSVWTFAVAGCGSSFDFWSIAICRMLVGVGEASFISLAAPFIDDNAPVSQKTAWLATFYMCIPAGTALGYVYGGLVGSQFNWRVAFWGEAILMLPFPILGFVMKPLQLKGFAPMESKQALTSIETVVPETGDDGMLAGDQAFIRGSKSTSKLWNQLTRFSKDMKVLLHDPVYVVNVLGYILYNFVIGAYSFWGPKAGYSIYHMSNADLLFGGITIVCGILGTLSGGLILDRMTSTISNAFKLLSGATFLGAIFCLIAFCFRSLSGFIVLFSMGELLIFATQAPVNYISLHCVKPSLRPLSMAISTVSIHIFGDVPSSPLVGVLQDQINDWRKTALYLTSVFFLAAVIWFIGTFLHSVDLFNEDDVDQSATTRREKMKPLLEGSSDAIPDDSYQA*
>comp55186_c0_seq10
MGLHGCLNGTTLQNLKLAAIIPTPSSSRFVFGPLHKALTLGFLSRHSDLQKHPLRRLIKPLSTSAALQTSPAASPSTTKALDDQGGKPQWKAIIDFKWIRDNKEAVAANIRNRNSHVNLELVLELYEKMFHLQKEVERVRGERNAVANKMKGKMEPAERQRLIEEGKNLKEGLIALEEDLAKLNDELQQEAQCIPNMTHPDVPIGGEDCSTIRKMVGSSPKFIFPVKDHLQLGKELDLFDFDAAAEVSGSKFYYLKNEAVLLEMGLVNWTLSEVMKRGFTPLTTPEIVRSSVVEKCGFQPRAKNTQVYSIDDSDLCLIGTAEIPVGGLHMDSILADSLLPLKYVAFSHCFRTEAGAAGTATRGLYRVHQFSKVEMFIFCRPEESEYYHEELIKIEEDIFSSLGLQFRTLDMASGDLGAPAYRKFDVEAWMPGLERFGEISSASNCTDYQSRRLGIRYRPSETPVTSAKKSKGNLAPPQFVHTLNATACAVPRMIVCLLENYQQEDGSVVIPEPLRPFMGGLNVITRKSG*
>comp50600_c0_seq1
MGIIRSCFSFISGTVCGVYLAQNYQVPNIMKLADTALFMAKLVEEKYRKPKKRGDDDD*
>comp296327_c0_seq1
MAMLSKHICTKILFSQSMLPLNFPLSRKQSGDNFSDQGGTRVVRVTALRDEVQSTKRVSFHNKLINIQSLGQLKAMKDCS*
>comp41146_c0_seq1
MMRNSEPNHVATEIEASKHAGNGTALPGLSPLSETLWREKTNTEFIGDV
>comp45143_c0_seq1
MPYSPLKYKAGIKTNAYSFIEIEIWFK*
>comp35342_c0_seq1
MFNLFSSEKILFEAYFSLKVPQYAGSDTIFICY*
>comp545298_c0_seq1
MVAGSGNSSGCSSSLCTMILSLWRFEWRFLLVFHNFSRRGLILSLWRLRYLLATRSYWVASCFWLAMQLFLAFVNCGVLVLGV*
>comp119286_c0_seq1
MPKAVKSDVKPRGRMTAYAFFVQICREEHKKKHPDEHVVFAEFSKKCAERWKSMSDKEKKRFHELADKDKQRYETEMKDYTPSENDKRRGKKRKMKDPNAPKRPLTAFFLFSNVERSKVKEINPEYTAGDTSKELGRRWSEADPSVKSKYQELADKDKARYDIEMSEYKLKGKFTSAAQRAKEEEEAELDDDEDEEDDVE*
>comp56119_c0_seq8
MDLPLGNEDPAILQLHKWDPSETRLELSEFRQAFLSPTREILLLHSYQREALLLPLVKGVSHSSGPESGYDYDNHNPGSSTISSQAFTRHSASGLVNDLPCTSGSEIDIDTDPAEIKCSRSNSYPFISDANSLAWALCGDSYDQHSDASFRELLFVSGKHGVTVHAFSKLNKSRGMVQDALEGHVRQGRWVEWGPVSTLVQNVEVGESGSLSHEVAGDQNIDRTGGDGGVELSRGSAAKRYLESFFTKVETTVSDGSVWTKFPENTEFPCSAEVVSFNIFDGNPPLDYLCKEKKIQSKENWQEQVDSAEDGSDQCDVFSNVFGIEINGFYECPRVFSSASYCLVGIFLTLMHHVPVNISHANKRGKSRNLLLVARLDSWGIQWVSMVKPDERINIGLAVEWMDFQFSDNLLVCLNSSGLIVLYAAMSGEFVAHLNVSQACGLNPHFDLRGLEELPLSDDIDVKQECDSKANLSDQRSDTFRRSFKRLVVASHTYLLAVVDEYGVIYVISLGEYVPDVNYSSEKLLPYCQQFGLGMLVGWGVGGSDIDSQMVHSNFSGYFHSNDSKMKNGSVSFSDKTAGNVLKKIDGCTFKEKGDLCGSYSSGFSVASKVTNDHKFSGSDVESHVMRKIFLPNFRVCEDDSICFSPLGITILSKKKYVKNQKGSQLVHFNLQVKSDVHDDNFLDSGYDVYHFNGKEEAVIGDAIGCTFQGCFYIVREGGLSVYLPSISILSNFLPVEYIGYRQSSKDIGISVLVKDNLEIKEPTKRFSPWKVEILDRVLLYEGTEEADQLCLENGWDIKVSRVRRLQIALDYLKFDEIERSLEMLVDVNLAEEGILRLLFAAVYLILNKSGNDSETSAASRLLALATCFATKMLRKYGLLQHKRDMYIAEGFNKTGLLSLPPIEPDKLPTEVDFARKLREMAHFLEIIRNLQRRLRSKFQRASQGLADSGEESSLMSTEMLQEESQLSVVPSDLVSLDTLNQHELSFPLPASSGDNNENLALVPVDSNSHLVSEEFGEASHFIPLGGILEKKVLPVENPEEMIARWKVDNLDLKTVVKDALLSGRLPLAVLQLHLHQLEDSIADKEPHDTFTEVRDIGRAVAYDLFLKGETALAVATLQRLGENIESCLKQLLFGTVRRSLRAQIAEEMKRYGYLGPYEWKILEEMSLIESLYPSSSFWKTYHHRLKDTSVPSNSVSPLENRLRLLHNDSFDSLIIESGEIDGIVSDSWMNINESSSALDVDEDDAHVGYWAAAALWFDAWEQRTVDRMILNQSFPSGNSLLWESQLEYHVCRNHWKEVFRLLDLMPAYVQSAGSLQLNLDVLQPASSLGCNMMSSNYGSFLCPLEELDSVCMEVPDVQIYRFSPDICCVWLRMLMEEKLAKRFIFLKEYWEGTMEIVALLARSGFISGRDKISLEGDLIETSSDRDGTVQALHKLFVHHCVQYNLPNLLDLYLDHHSLVVDQDSLYTLQEAAVDCQWARWLLLSRVKGCEYKASLANARSIMSHSLVPRSDLSVLELDEIIRTVDDIAEGGGEMAALATLMHAAVPIQSCLNSGGVNRHSNSSAQCTLENLRPTLQRFPTLWRTLVGACLGQDTMGLLVPKAKNVLSDYLSWRDDIFFSTGRDTSLLQMLPCWFPKPIRRLIQLYVQGPLGCQSFSGFSTGDTLLHRDIDLFINADVHAEISAISWEATIQRHIEEELHGPLLEDNGLGLEHHLHRGRALAAFNQILAHRVQNLKSEGEASTSAHGQTNVQSDVQTLLSPLGQSEETILSSVLPIAIMHFEDSMLVSSCAFLLELCGLSASMMRVDVAVLKRISSFYKSSENNENLRQLSPKGSVFHAISHEGDVTESLARALADEYLHKDSPVIAIETGAPSKRPSRALMLVLHHLEKASLPQMVDRNTCGSWLLSGNGDGTELRSQQKAASQHWTLLTNFCRMHQLPLSTKYLAVLARDNDWIEFLSEAQIGGYSFDTVVQVASKEFSDPRLRLHMLTVLRGMQSKKKASSASFFDTLEKGCETTFLDENMCVPVELFRILAVCEKQKSSGEALLMKAKELSWSILAMLASCFPDVSPLSCLTVWLEITAARETSSIKVNDIASQIADNVGAAVNATNALPVGDRMLTFHYNRQSPKRRRLIASVSASAISDISSTSMGEKIFDSQGKTIEDERKVEQSGHINIASDPDEGPASLSKMVAVLCEQQLFLPLLRAFEMFLPSCPLLPFIRALQAFSQMRLSEASAHLGSFSARIKEEPMYLHANVGREGQIGTSWISSTASKAADAVLSTCPSPYEKRCLLQLLAATDFGDGGYAAAYYRRVYWKINLAEPLLRKDGELHLGNEASDDATLLSALEKNRHWEQARNWARQLEASGAPWKSAMHHVTESQAESMVAEWKEFLWDVPEERVALWSHCHTLFIRYSFPSLQAGLFFLKHAEAVEKDLPAKELHELLLLSLQWLSGMISLSNPVCPLHLLREIETKVWLLAVESETQVKSEGDFNFSFSIRENAIKNDSSIIDRTASIIAKMDNHINTMRNRTVEKNESRENNQIPHKNQAMDTGLSTTFGGSTKTKRRAKGYMASRRPPLESADKSADTDDGSSTFSFKNELQLQEENLKVEMSFSRWEERVGAAELERAVLSLLEFGQITAAKQLQYKFSPGQVPSEFRLVDAALKVAAISTTPSNVSVSMLDEEVRSVLQSYGILKDEHHVDPLQVLESSVAIFTEGSGRGLCKRIIAVIKAANTLGLSFFEAFNKQPIELLQLLSLKAQESFEEAKFLVRTHPMPAASIAQILAESFLKGVLAAHRGGYMDSQKEEGPAPLLWRFSDFLKWAELCPSEPEIGHALMRLVITGQEIPHACEVELLILSHHFYKSSACLDGVDVLVALAATRVDAYVLEGDFACLARLITGVGNFYALNFILGILIENGQLDLLLQKYSAAADANTGTAEAVRGFRMAVLTSLKHFNPNDLDAFAMVYNHFDMKHETAALLESRAEQSCEQWFRRYNKDQNEDLLDSMRYFIEAAEVHSSIDAGNKTRRGCAQASLLSLQIRMPDFQWLYLSETNARRALVEQSRFQEALIVAEAYSLNQPSEWALVLWNQMLKPEVMEEFVAEFVAVLPLQPSMLIDLARFYRAEVAARGDQSHFSVWLTGGGLPAEWAKYLGRSFRCLLKRTRDLRLRVQLATVATGFGDVIDACMEELDKVPDNAAPLVLRKGHGGAYLPLM*
>comp36691_c1_seq2
VVTTLRSCEGNLLSSGKRFLNRTCQETLRTTRHGVDSSKEEGCDYANLVSSTHDSDNQSNCFPRALWLQNKFCSSYSSKSTFQGSTQQQKDFLSTPKYTCSETYTYASEP*
>comp335858_c0_seq1
MINPVFLFRYMSKKVIMKTRGKSISKYI*
>comp43137_c0_seq1
MASSKSGVGSGAVVALERMSVEQLKGVKEQADLEVNLLQDSLSNIRTATTRLEIASSSLHDLSLRPQGKKMLVPLTASLYVPGALDDADKVLVDVGTGYFIEKTMAEGKDYCERKINLLKSNFDQLVEVASKKKNVADEAGAILQAKLKQLASST*
>comp15963_c0_seq1
MAFRNLAKWHAMGAVLVEKDQIPGKELFAERLPMKRMNQSFTHFLKMLAEVVRSTWGRKWNRLAEQLKDSVPQIDGKIRTIFNRSNEQDAFNVFNFGDFHWPELWLNYGVSDAYVTEHPIAFKFSSFETSHINTPATDLHHVTYSTLN
>comp285727_c0_seq1
LILVSLEWELVHFLASYGGRPHFLTALLSRQKY*
>comp53675_c4_seq3
MAIRDCYDARKIDNSSYRALYYMSEALSQLGRHKEALDFAVAAHSLAPSISEVEERVENVKKDIASAEAEKNSKTNDGASRFDSRGGRILSLSDILYRSEVNSDASQDGPRSDRDDSDYDEELELDFETSISGDEGHDVESNILHGSLNLRIHRRGDSRENAGANGSCESPSSSSQNDRASYQPEAAIDMKQRFIGHCNVGTDIKQANFLGQRGEYVASGSDDGRWFIWEKRTGRLIKMLNGDEAVVNCVQCHPFDFVVATSGIDSTIKIWTPSAPVPSFVAGGSAGPETGDVLVAMESNQQKLSHNRDSILPFELLEPFRMHEFPEG
>comp50860_c0_seq1
MAIRVFLILVLFLSSANFSFSLYEDQVGLMDWHQQYIGKVKHAVFHTQKTGRKRVLVSTEENVVASLDLRRGEIYWRHVLGTNDVVDGLDIALGKYVITLSSDGSILRAWNLPDGQMVWESSLQGSKASKSILYIPKNLKADKDDLILVFGKGCLHAVSSIDGEVLWRKDFAGESIEVSLIIQSPHNDVIYVAGFVGSSNFYVYGFNAKNGELLKNNHAALPYGTFGELLSVSGDMFVVLDDTRSKIVTVNLKNGEISYNQKHISDLIKDSSGQAVILPSMLPRMFALNLNSHIILIKVTNEGELEVVDKINNVAAVSDALSISEGQHAFAFVQHGENKILLSVKDVNDWNGDLLKESIVIDHQRGNIEKIFINNYVRTDRSHGFRALMVMEDHSLVLVQQGEIVWSREDGLASVVDVTTSELPVEKEGVSVAKVEQNLFEWLKGHVLKLKGTLMIASPDDVAAIQAMRLRSSEKSKMTRDHNGFRKLLIVLTRAGKVFALHTGDGRVVWSILLHNLRKSEICEHPVGLNIYQWQVPHHHAMDENPSVLVVGRCGTSFAAPAVLSFIDAYTGMELNSLNLAHTVAQVIPLPYTDSTEQRLHLIIDVNQQANLYPRTPEAIDILRREFSNVYWYSVEADNGVIRGHALKRNCIHKAVDEYCFDFRDLWSIVFPSESEKIIATVTRKSNEVVHTQAKVMTDHDVMYKYISKNLLFVANVAPKARGEIGTATPEEAWLVIYIIDTVTGRILHRMTHNGCQGPVRAVFSENWVVYHYFNLRAHRYEMSVIEVYDQSRADNKDFWKYVLGKHNLTSPVSSYSRPEVITKSQSYFFTHSVKAIEVTSTAKGITSKQLLIGTIGDQVLALDKRFLDPRRTLNPSQAEKEEGIIPLADSLPIISQSYITHSLKVEGLRGIVTVPAKLESTSLVFAYGVDLFFTQIAPSRTYDSLTEDFSYALLLLTIVALVAAIFVTWVLSERKDLQEKWR*
>comp21058_c0_seq1
MIRTHRASAKNFHELQRKLQAHVGHALRTKIEFCEI*
>comp32963_c0_seq1
MILLLNMILSRHLLSQESLKSILCRWIVKDLYRLSIWELQTSSHDF*
>comp298651_c0_seq1
MQELGALVVRQGDDINSIYNATERTQVDVELARKELEIGADYMARRRKKNCFLLSIAVIAVIILVIVIALSLRR*
>comp47049_c0_seq2
MKRAPRPVSSVLQSNQIDFTNHFHSSHCISSSFIFRHCFMYRSSETRIIPCTSDLAMFEVHGLQRKRKYLTLIFYSLQRSHRME*
>comp44681_c0_seq3
MVPRALLAKFIRKPATVSLFQFNQKRELHSRNKKAMELIAKGWSALKEVDRVIDYCELNDRRLIPLLRTAKDNFELALEADNTNTHARYWLSKLHMKYHVPGANKAVGAALLVEAAEMGDSDAQYDLGCHLRIENDYVQSDQQAFYYLEKAVDQLHPGALYLLGAVYLTGDCVKKDIASALWCFHRASEKGHAGAAIAYGSLLLKGVEIPQSLTKFSLKRGSAAHKLGKSKESLATDPVEMAREKFQIAAKAGCDLGFKWLARLEEEERRLLTEGYSD*
>comp49971_c0_seq1
MIFANDFVQFNKGYVKSMADAVGEKSLLCVPLESHKRIRRLLSVPFSMTSLSAFVTKFDKMLCGGLQKIEESGKSFKVLDFSMKMTFDAMCDMLMSITEDSLLQQIEKDCTAVSDAMLSFPVMIPGTRYYKGIMARKRLMETFREIIARRRRGDESPGDFLQSMLQRDSYPASEKLDDSEIMDNLLTLIIAGQTTTAAAMMWSVKFLDDNKEAQDILREEQLSLTKNKPDGASLTHEDLNNMRYGLKVVKETLRMSNVLLWFPRVALQDCTIEGYDIKKGWHVNIDATCIHYDSDLHKDPLKFNPSRFDEMHKPYSFIPFGSGPRTCLGINMAKVTMLVFLHRLIGGYTWTLDDLDTCLEKKAHIPRLRSGCPITLKSLSNSMQEV*
>comp16511_c0_seq1
MKLKFWDTKSEVYFFLTPCVGNYYFSSFLETLYIFLLLRIVWCCFLPSFL*
>comp156030_c0_seq1
MTPSPNSLTEVLASTMTNKDGPTDSRINPNPVQLPSSSSLQNYIGNRRYYKESERLKTFERWPVSFLSPRTMTEAGFYFINRDDIVRCAFCNIEVGRWVEGDDPLADHERWAPACRFIRHIDVNNVPLGEEGSTSGDSGSESLEGFDVCGHGMDFQTESQRPASLLETHEGYLKSRAPCFANYATLDARLRSYDTWPISLKLKPNVLSDAGFFYTGKGDQTICYHCGGGLKDWEETDEPWVEHARWFSKCPYVLAVKGKSFIEEVNGSRAVQDVTQNGNIGLSCSTGDLDKVPSASVEDKVKKTTSEAVKTVGDQGSRPKEESQPPAQTHDGRLCKICFSEEMGAVFLPCGHIVACVKCAVSLTTCAICRQPVTGTFRAFLS*
>comp178086_c0_seq1
MFIIINMNLISYKQASIWNCVCGVNLKSYKQASILSKLIAENMNGNYIKLNCKLFNHIQSAT*
>comp23816_c0_seq1
MAIECLVHQMFTSKSDVWSFGILLWEIMTLGGCPYPTLQSAEVQRSLLRGERLERPKLCPPNLYALMQECWNPLPHLRPTFSQLVHHLEAMLQSDAQHRYLELDEVIGSYSHLY*
>comp22332_c0_seq1
MNKHCFQVMYQSASTATICLGYPSHESRKISRLNISPALHASSLLHPYHSFEIILIWHEISYTLALKKY*
>comp59520_c0_seq9
MATESPIRISEAGGKWPSLKEAASFGPPSRNMATEDLGILLKGHRFHGSGKDVVPNRSGSAPPSMEGSFLAIENLLSQQKTTQNASLATLNRAMQKYDSIKGSLHLPRGVLATHKEESEDDSPQQPYDNELDKTSAIWRRQDAASMASQHKNVVDSVLEDLPHTMSPAYNKSLGVVDELIDLDAGSSSSHGPLVTTLDVAKPTVGANDIRLSSTVDTPAPVASSSSLESTGSMGFSDLDATIVESQLRALSVSNIPNSESQSYEEKWKNSCQNNFMQHQQQNNPCEVPSANSQSENYAYVGMEQFLQNPSKFSSDVQPLLQSSGFTPPLYASAAAYMTSANPFYTNLQASGIYSPQYVGGYTFNPTAIPPYIAAYPHGAVPLVVDGATGSSFTPPTPGVSAGGSISHGAEMVHENKFLGQFGFSLQPSFGDHIYMQYHQQPFVEGYGISGNFDPLAPRVSGGSQIGPFDSQKGPNSGAYLDDKKLHHQRSGANLNSRRGRLMVPSYLGHPPNMGFVTQYPSSPLPSPVLSGYPAGSSSLPGGRNEMKLSPASGRNGGILSEWQGQRTFDSARDPKIVNFLEELKSSKGRRFELSDIIGHIVEFSADQHGSRFIQQKLESCGVEEKALVFKEVLPHASKLMTDVFGNYVIQKFFEYGSPEQRKELANRLAGQILPLSLQMYGCRVIQKALEVIELEQKAQLVRELDGNVIRCVRDQNGNHVIQKCIESIPTKKIGFIISAFRSQVAILSMHPYGCRVIQRVLEHCTDEVQCQFIVDEILESVCALAQDQYGNYVTQHVLERGKPQERRQIISKLSGHIVQLSQHKFASNVVEKCLEYGDATERELLIAEIVGHDEQNDNLLTMMKDQFANYVVQKVIDICSENQRAILLSHIRVHAHALKKYTYGKHIVARLEEQFGEENQTPGS*
>comp51894_c2_seq1
MFQDNSHGSVKAHSSSIASDSGNDTPYEVSELGTPRHGKDKCSDRSMENSTSEHDLINSTETTVDHAESNKDFIYEDMAKISRHGMCTEISVTDKVTENTANAVALRLDGTEFKPGIQDSTMNGHVKRLSVESIGSDSSSIRNSETLNPAVTTLHQDASHDLPGSREPSGNSDLLVIFPSDERHKLNRILNTQQQRLDTAKTDVEDLLARLNQEMAARQYLMTKVKDLEVELETTRLNCRENMQQAVLTEKERFTQMQWDMEE
>comp54388_c0_seq1
MAQDSDSEKRFHSIMDKLFHAPKSLSQHSSTSSSSGGKKRPYQSTALGVVQPNLRGDAAEGHQPSSAAAGAQGPLCRPWDRGDFMRRLATFRSISWFAKPKAVSAVNCARRGWINVDIDTITCEACGARLLFSTPASWNQQQVEKAALVFSLKLDNGHKLLCPWIDNTCDDTLARFPPTPPPILVDNFRERCSALLKLSALPCISSSAIDYMKSPLLEDFLGQSLMMECGNGPANNSGIEIVSSQHELRLYYQAQKLISLCGWNPRSLCYQVDCKDVSDQSVKSTTILDSQVVAGMKSNSLIVQSANADESLKTDENSKDSSREQMDPNSVVLDCSLCGATVGLWAFSTVPRPVELIRVVGYAEVNSENDFGTNNLFNTSDLENRQGVTNAMSDVATSSKDITSSLNMTIAGGPPPTKQNFKAIISLPVIGQNLRARLSYDSDCRDHAFVNGDGIQSDSQKKRRIQEKTDGTVNASIGQLVPISSEIEEVSDYQTGSQASINDSVVDDVIEGTDYTGHPSSHKDKMPIHTEADGLNSSAAGDPSSSQKDLTEGDALSVSQKTLGGEVSSLENYVVKDRVEDPTNSDSLGKDLRPVPSDKAMAFDPIKQHRHFCPWIASINDGEPGWKQTISALYHQKNHLPPSPNRTPSSTPILKVDDPVGSVRKLFMSPSTGRKNLTRISGQSTEHR*
>comp57751_c0_seq3
MVFHPLMAVHNVFPNLQIFPPFSLGFSCSFPQTLNPFHARQQHRRHHQHGPRAFREWREYEEAVKRKDLAGALRFLKSLETEEYRVEVFEPAESTRSRFRELDLFGPQRDWEVLDTCLNADDMKLVGNAYKFLKDRGFLPNFGKCRNIVLEGSRNITPDVLRSSTGLEVTKLAPKKWGLSESSSTVLVVFLGGVSFLISQGIDLRPNLAAILGLAIIDSIFLGGTCLAQISSYWPPYRRRILIHEAGHLLTAYLMGCPIRGVILDPIVAMQMGIQGQAGTQFWDEKVANDLAQGRLDGTSFDRYCMVLFAGIAAEALVYGEAEGGENDENLFRSICLLLEPPLSVAEMSNQARWSVLQSYNLLKWHRPAHRAAVKALESGSSLSVVIRRIEETLYSIK*
>comp288476_c0_seq1
MAKQWKFESLFSLSTLFHNHSKWCTLACRIIVKSQLSWLSNRESEGHSS*
>comp173110_c0_seq1
LCFHHNPPLFCFHDNPPTLSFYFLINRPFHP*
>comp431329_c0_seq1
MTDPNVASFEAFFHGWMVRQRDYLNEIVSAQQHHHELQDAARRKLISRVFCHY*
>comp165323_c0_seq1
MHCMQGNWKCDKGYIKKHSITKRKELRALMQFYFILLIQIFWPTP*
>comp49684_c0_seq1
MSQCEAVTGGKAAILYTGLYLIALGTSGIKAALPALGADQFDDKDPMEAAQLSSFFNWLLFSLTIGAIVGVTFIVWIGTNQGWDWSFAVCTIAVVFAILFICMGKSLYRNNIPKGSPLTRIIQVFVAAFRNRKLKIPENAEELHEIHGKESEDNYEILKRTDQFRFLDRAAIIRSNSGATTPVNSGPWSMCTVTQVEEAKILIRMLPIILSTIFMNTCLAQLQTFSIQQSTTMDSNILGFKVPGPSLPIIPLLFMFILIPLYDRIFVPFARRITGIPTGIRHLQRIGIGLVLSAISMAIAGVVETHRKSVAMQHNMVDSAEPLPISVFWLGFQYGIFGAADMFTLVGLLEFFYAESSVGMKSLGTAISWCSVAFGYFTSTVVVEVVNKVSGGWLASNNLNRDKLNYFYWLLSVISVVNFGFYLVCASWYRYKTVEDKQGDSKASVEMPKV*
>comp368054_c0_seq1
MIVCHSVFMTPEERCSLDNKIGLIFEVNSLDHSLWYFLTFSSNWVASLSL*
>comp55939_c0_seq3
MRPPTLNIFPSQPMHVEPPSSNSKARMELVSPQTSGSKRPSEPSMELANPRNEAASAPEPPKAVKRESNRKGPTSSSEQEGPKTPDPKTLRRLAQNREAARKSRLRKKAYVQQLESSRIRLNQIEQELQRARAQGIFFGGGALLGGEQGLPVTMNSISSEAAMFDVEYARWLEEHHRLVCELRAAVQEHLHENELRLFVDNCLAHYDQVMNLKSLVAKTDVFHLVFGMWKTPAERCFMWIGGFRPSEVIKIILNQIEPLTEQQILGICGLQQSTQEAEEALSQGLEALNQSLSNTITSDSLSCPPNMANYMGQMAVAMNKLSTLEGFVRQADSLRHQTIHRLHQLLTTRQAARCLLAISEYFQRLRALSSLWLTRPRQE*
>comp35606_c0_seq1
MLPRYFWYGDHIAETLIGMFFPVFFLRGLQVICSSVLTCFIYA*
>comp33816_c0_seq1
MASSMETNPAPRVEEQGGGVPMNNELNNEMRNRGNKKKKRKNGNKRSSYLPRFGCFRVELQHDATGESFDMEVVDASGQRPNPTHLIIMVNGLIGSAQNWKFAAKQFLKRYPNDVIVHCSECNSAMLTFDGIEIMGERLAEEVISVINRHPSVQKISFVGHSLGGLVARYAMAKLYGRDISRKSFQENGHHGNQNSDQACNDRKYEGTIAGLEPINFITYATPHLGSRGHKQVPLFCGLHSLEKAACRISWFLGKTGKHLFLTDIDNGKPPLLLQMVRDTEDIKFISALLSFKRRAAYANVRYDQLVGWSTSSIRRRNELPKRQHLSRHENYPHIINVESTKSLSVPEEVPTETKVNSGSRKLDLEEEMIRSLTSMSWDRIDVSFSGSRQKYLAHNTIQVKTYCINSDGADVVQHMIDNFQL*
>comp59821_c0_seq1
MYEKTNLFCFLVFRRVQVCVFFLFKFCSFDSQRIIAMSVAPVESIASLNSDLFYNILQRLDGQTLASAACTCAAFCSISKEESLWENVCSSVWPSTNREDVKSLISSVGGFRKFYADCFPLIVNKEVAEYQRNNYLEYPDDWTEAEYYGDMNESESISPSDFVSIVDIRFKDKPICSKIQWGIPNANGYDGWFYNCPFRIDLLTYADRDDNNDGVVTLSVSDGLPPITSMERERKDGKLWRELRDGLQLSWIMVNRKIKQAANLASWSPLGGQRHWPTDKDFVIRFGSVLPAKDILPSQVVECILIMKFRVVHTEEEGVQTTLKLTELSMQLEDMEGAHVNGRNSLLILKEALSCRRSKNYSEVLESCHMYSKVQNELKEEKMRNESRLDRLCILSGIAAFMTFWYCVL*
>comp58652_c1_seq1
MAEDFSKAVEDGIKLSKRIYYGKDRAVAPPKPPMSMVKSENAFLPTAPMVYAVIHDPGIVDNPDIPSYQPHVYGRCHPPALIPLQMNGIELVADCYLDTAFVTVTGSWRVHCVMGSHTCDCRIAIPISQQGSILGVEVSVPGKSYSTQLAVMEDNNEKENGTRAQNGGFLNPNIFTLSIPQIDGGSILSIKISWSQKIVYQNGQFSLNVPFTFPDFVNPAGKKLSKREKIQLNVNAVIGSGLLCKTISHPLKEVKRHAGSMGFLYDSEVLSWSRNDFSFSYAVPSSHINGSVLLESASVHDFDQREMFCIYLSPGNIQSKKVFRKDIIFVIDISGSMRGKLIDDIKNGLSAALSKLNPDDSFSIIAFNGESYLFSKSMELASKDAVERAIEWINMNFVAGGGTNILHPLNTALEMLSSTRSSVPIIFLVTDGTVEDERQICDMVKNHMINGESICPRIYTFGIGTFCNHYFLRMLAMIGRGQYDAALDVDLVEPQMLTLFDKASSLVLANITMDIFNDLDEFEVYPSHIPDLSSEGPLILSGRYKGSFPETLKVKGVLADFSNFVIDMKIQKAKDIPVQRVCARDQIEHLTAQAWLSENKQLEQKVTKLSLQTGFMSEYTQMIILENDLLKKVKEPAGAKEEKVSKKSHPLHGANVQGQRMILLPNLGIGFGNLTATVENTPPGSETKLPEVAEIFKAATNCCSTLCNYCCCMCCIQFCSQINNQCATALTQLCIGLGCLGCLSCCSEICCSGNEG*
>comp25878_c0_seq1
MLKIQSTRSCYYSYRALHVKHGYKSMLNIEVSFIFCFRFQFKFYWEMHEKLKINLIISSAFFPKGKKGQLDQMVNSIKSVLGSVGGK*
>comp51609_c0_seq1
MEVPSSWDALRKQARKLEAQLDEQMNSYRKLVSANVSTKADASESDLESWIERLLNQLQQVNSQMQAWVSSGGLEMVSHTLTRHQEILQDLTQEFHRLRSSLRAKQEHASLLEDFKEFDRTRLDLEEGSGSEQHALLKEHASISRSTGQMDSVISHAQATLGALVLQRSTFGGINSKLSNVSSRLPTVNNILSAIKRKKSMDSIILALVASVCTFLIFIYWLSK*
>comp42601_c0_seq1
MAPPTPRLVVPIDLKKKPWEQKLPLHNRWHPHIPPVADVSTGEVFRVEMVDWTGSAIRDDNSALDIKLIDLSTVSINIIPTPVVRNRIPMILGINIENLILKTNTTTETK*
>comp59179_c0_seq1
MDPEAALPQSLVWDPYTNTTIICLNVTVNLNLTVNLHVLAQKNLLLTPRNMWLSLVLQSKQNARASIIKLQIY*
>comp306427_c0_seq1
MDQTLKKIVDSDGYIGRDQVLQWWQSIFSRHVTKNEDLYFDGVHCKVTWRTLGPAITVRMKFDDSQEIDVDL
>comp241103_c0_seq1
MIAAQHQYTESLHRTWSLSTKIVSTYTIWNIFTLRNHTYYSGIRA*
>comp104145_c0_seq1
MDETELLSTRVFFLIHQNVLGLFIGLGGNSCPNTDMIPLSCLDMKHQAPSVILPSIPDTSFVFLYLPCHVWL*
>comp33755_c0_seq1
TTSFLNFTIETDKVTGIYPDILFTTLGRNQYNLGEQVEAGRIRTSYSVEFTVPSGSNKPSCVGGSQQASSQYVTEDEVDLVYIGEDVPSWPDDQQVLYKLVTKGFLENINGAAEDLFINVGAQALAKVCQ*
>comp35162_c0_seq1
KSDLKYKFKVKKGFGKHYLNYANSRSKLWLTKSCFHLPPN*
>comp53243_c1_seq3
MRQVVAKEGIAEMAKEGITKMTGGGLGVAEGVVGIVGGEGIVGDEQENVNKEAGTEEEGGC*
>comp3584_c0_seq1
MFANSFHFHCPLFNEIKHSFTCFWIFYSWVSTCVQQSKLEFKPF*
>comp38031_c0_seq1
MWCLPYLCASPYLWLPKMHPPPHLSSLTLLYFICRRPCS*
>comp7255_c0_seq1
MILGTLDNSTCLDAHFSPCKRAKRVALLA*
>comp167617_c0_seq1
MSSCSTMSICCEDFISYTETVVEYLASHSFKRRI*
>comp58030_c1_seq2
MLRRLQQGPTSNHTPCSILMSTRQKSSGGTRPKKKIYHRVPQLDRVMNLHKKPSLILHLKSIIQSHKNQRLLLRDLEKNVGFVQKWDFMALIDRYPMIFRVGGGNGVPPFVCLTEKAMKIASEEGEVRELMEPFLVNNLRKLLMLSVDCRVPLETVEFVESELGLPCDFKEKLIPKYPQFFSVKCFNGRDCLELEDWDSSLAVTAREASLAQEGIVKGFQRKVKVSRDGNYVGPFAFKVNFPDGFRPNVGYLEQVERWQKLEFPSPYLNARRFEAADPKTRKRAVAVLHELLSLTMEKRLTSAQMDAFHAEFLLPSKLLLCLIKHHGIFYLTNKGVRSTVFLKDAYLGSNLVDKCPLLQFNDKFVALSGRGNIDLCDSKNSLQTVV*
>comp38424_c0_seq1
MWFLLMVNFLSSNYDTIGRVVCLLVSVFWVRMRWCFCFFLFGLNFFCERSIAYRQSHVLFPDNSGYLILNFIIK*
>comp564_c0_seq1
QNQQAKPKRYQERNGREKARELRQSPSVGSISTLERSRSSGARPYRTVTVAPPSKGASSPKATCGLCGIFGKPVVATRQSNPKSKKRR*
>comp17642_c0_seq1
SANAHYPAKKNENEQSILSWFRKKKVTKIGNLIYDIWPT*
>comp48640_c0_seq1
MGRNQFTAISISFSCQCCAKKYLADKHTVLLSINIYVNISSTMTKHEWSKYEGRFHK*
>comp23690_c0_seq1
MCCEGLVENLPQLEKCCFCARVETGSKILAWFGTITAFIYTIASIIGLVALVAAVSSSKTPVKPEDKEAQITLAIFVGIIFIIFLSIVWVMALLLLIGLYKEDMGKVRIWLKVNMCLYVFAVVGSIFNVGTLIFTGKEAVFVLVQILSLIIQYLIAFYFLSVIKSHYVNKTQNIQSIDEENRRSGGIFHRQTLPTKE*
>comp208016_c0_seq1
MLTHEWSQMNLKKGDAIYDVNWMTVDVWLILKVYEDSITSCVLNRK*
>comp50900_c1_seq1
ANEEKKKPQHHKRYVAKVTAILLATNKKVFLVGPITLGDKIN*
>comp14340_c1_seq1
MEKTRKKSVQLTHTHEFLNTNFKQFPI
>comp243241_c0_seq1
MLLDISFSRHMPQLSSDISNQNQWNCQKVYHPYTKSSECEILEANKIR*
>comp26616_c0_seq1
MEAEVHREEKGAVKKVMVAIDESEYSHFVLMWVLESLKETITKRPLVIFMAQPVIDNNYTFAASLGTARMYSPVSARPDFVNSYKENQRKLVLALLEKAKNICTNHGVNAETLTEEGDPRSAICSAVESITLICLC*
>comp12475_c0_seq1
MILLSWNTSTISCWKNSFRRKMPCNCTSEEQASYRVLHIMYCRLA*
>comp56830_c0_seq4
MAEEEVVAPVASPVPSDYKRKFEDLEPEAPEPTEQQPLESNANSSNSEPDDREKTDAAVSDEGENKRPRLDDKLDGLANANNGHQDEQLDEPIIETGEKSNLENVLPEGGQSISKDLPEDGQSISKDIPDATTNEQTSSEIAELADAKQLPVEDSGQDNAEEPSKETEQPSKESTEQHVSSEDKQPKSVDIATHDMEFPYNKQDASSGQKQPISGAEIMTRKIDVPNNKVGVLIGKAGDTIRYLQYNSGAKIQITRDADADPHSATRPVELIGSLDSIDKAERLMTAVIAEADAGGSPSLVARGLSPAQAVVGSEQIQIQVPNEKVGLIIGRGGETIKGLQTKSGARIQLIPQHLPEGDDSKERTVQVTGDKRQIELAQELIKEVMSQPVRPSTGGFGQQAYRPPRASGGPPQWGQRSSHFGHQTAAYDYQHRGPYPSHNQSYAPPPYGNYPQHMAPRSGFGSGWEQRPHHSMQGPPQHNGGYEYYGGQGGHLSDAPPSTQLPSSVPPHGAGPSPVASMGPSPAQVSYNYGQPQGPDYGHQAPYTQTGLPQQGYGHGYDESKFENRAPTQHPYGGHVNSQPTYPQAGAQPNFVAPQQYGKPPLYSMPSQGQPPQSYGHPRATQPGDMPYQGSTPAQSYGMSMPSQQPYPYVSSGPSQAAYPTYGSAPAADSYNHPPPASGALYAQPGGQPSYGQPGAQPAASYAQVAPTGYGSYPSSQQAYPEQSAPNNAGYGYQGPQDPGYSSGAAPAYSAAPSGQPGYVQPAPTQTGYDQSIPQSAGYAAVQASAPAAYGKTLSPQPAYPQYDSTQVYAAPR*
>comp58514_c0_seq5
MGCCFSARIKAESPPRNDLKSKDGSREEDGLSGLSSKVSTPSVLLTPRSEGEILQSCNLKSFSFNELRTATRNFRPDSVVGEGGFGCVFKGWIDEQTLAPAKPGTGIVIAVKRLNQEGSQGHSEWLTEINYLGQLHHPNLVKLFGYCLEDDHRLLVYEFLSKGSLDNHLFRRASYFQPLSWNIRMKVALDAAKGLAFLHSDEAKVIYRDFKTSNILLDSNYSAKLSDFGLAKDGPAGDKSHVSTRVMGTYGYAAPEYMATGHLTKKSDVYSFG
>comp288411_c0_seq1
MECPYFLFVIFWLTWHFSFTISLGKESSMTLNLDFLVDYIK*
>comp60012_c2_seq7
MGERLAEEVLSVVRRWPEVQKISFVAHSLGGLVARYAIGRLYDYSSTLEPVGTCRNCFSEEMTEYSKQCLEQHFEAKIAGLEPMNFITFATPHLGSRGNRQLPFLCGLPFLERRASQTAHLVAGRSGKHLFLMDNDDGRPPLLLQMVDDSDDLKFMSALRAFKRRVAYANANYDHMVGWRTSSIRRQHELPKSNLLVIDEKYPHIVYVEGETADDIHIKAPSNVGGQTIDLEEEMIRGLTQVPWERVDVSFQKSKQRYVAHSTIQVKTYWLNSDGADVVYHMIDNFLL*
>comp50884_c0_seq2
MVMMKHPFFSLPLLLMVLCYSTTTLAQSPAAAPAPAPTSAPTDIIRILKKAGGFTTLIRLLQTTQVATQINSQLLNSNGGLTFFAPNDNAFSSLKPGFLNSLNDQQKNELIQFHMLPTFVSTSNFDTLSNPVRTQAGENPDRLALNVTSSGNQVNMTTGIVNTTVGGTVYSDHQLAVYQVDKVLLPRDFFVAKPPAPAPAPSKPKASKKKSADGTAAPADDDSAAMSLKQMHGLWVPVAVAAAAFSL*
>comp42022_c0_seq1
MLQIIVCPYHMLIFFLLLLPTMHFFMLQVVCVLACNFKLLHGQYMKDEGTCSFWCFIMYIFIETNLTFFLI*
>comp352525_c0_seq1
MEQPQPQAPPANAVPKYQGNPNDMALYNQTIQEQESRMHHLMRQITSSPYMPTREQAIQLATTVLTLLLMMLLGPAAGPSSAIIQMILKQVVPLLVAATVHYAADHAAPMKPLPSANVVSAHIAPVQVQPSMMGQTI
>comp170278_c0_seq1
MVLLFQMLINYQIKGSIVISHIFATYSSPAIVHSFILTFFLGTQMNLHP*
>comp26233_c0_seq1
MTPFSIFISELCIIFPKDLDNKVCVQHSLAIKLGQN*
>comp38324_c0_seq1
MNASHGIERIPTPKPPVNKTQIAKLLKDASHLPQLQIQCLRSLKSIASESETNRRCMEAAGAAEFLASVVLSNINSAALPELEANPDDGFDLKTGAGDEALSILHNLHLSEAGLNTLLGFKSGEFIDSLTRVMQKGIYESRAYAVLLLKSLSEVADPVHLFHLRTELFVELVQVLKDQISQKASKATLQTLIQLSPWGRNRFKTVEAGAVSVLIDLLLDCKDRKPCEMMLVLLETLCQCADGRAELLSHGAGLAIVSKKILRVSTMANDRAVRILLSISRFSATPSVVQEMLKLGVAAKLCLVLQVDSGNKAKE
>comp30918_c0_seq1
MYNSGKWLLMDLSFLFLYTHFLFDIVEVSVYMCSYFWHI*
>comp59042_c1_seq1
MDGSLLKLVSTVLLLSFAAPVLSATDPNDVKILNQFRKGLDNPELLPWPEDGGDPCGKPTWKYIFCKGNRVSQIQAKNLNLSGPLPQNLNQLAMLENLGLQNNKLKGPLPSLSGLSKLQYAFLDYNDFDSIPDDFFNGLPSLEVLALDSNTLNGSTGGWQFPSQLQDSAQLTNLSCMSCNLAGPLPGFLGNMQSLSFLKLSGNNLTGEIPTTFNGTVLQVLWLNNQQGGRLTGPIDVVATMSSLTSLWLHGNQFTGTIPKNIGDLASLKDLDLNGNQLVGLIPDALGKMQLDSLDLNNNHLMGPIPNFATPKASYDSNNFCQTEPGIPCAFEVMALLDFLGGLNYPLSLVNSWTGNNPCNGPWLGIKCNANGKVSLINLPKFNLNGTLSPSVAYLGSLVEIRLGGNNLSGVIPSNWTSLASLTLLDLSDNNISPPLPQFTTRLRLMTDGNSLLKLSPEAPSSGNSPSSGNAEPSPDTPTSTPGHSNSNSSNAHETKKSKRKVLVSIVAPIAGVAAAAFLLIPIYAYCFRKKKEAFKAPSSLVIHPRDPSDSGNTVKIAVANNANGSISTVTGSGSRSRNSSGIGESHVFEAGNLVISVQVLRNVTKNFAPENELGRGGFGVVYKGELDDGTKIAVKRMEAGVISSKALDEFQAEIAVLSKVRHRHLVSLLGYCIEGNERILVYEYMPQGALSKHLFHWKSSELEPLSWKRRLNIALDVARGMEYLHTLAHQSFIHRDLKSSNILLADDFRAKVSDFGLVKLAPEDEKSVVTRLAGTFGYLAPEYAVTGKITTKADVFSFGVVLMELLTGLMALDEDRPEESQYLAAWFWHIKSDKKKLMAAIDPTLDIKEETFESISVIAELAGHCTAREPNQRPDMGHAVNVLAPLVEKWKPFDDDTEEYSGIDYSLPLNQMVKGWQETEGKDLSYMDLEDSKSSIPARPTGFADSFTSADGR*
>comp37209_c0_seq1
RDRDRNLKPWSNKFQQRGILWPNYSLEHKKTKLFGLI*
>comp15026_c0_seq1
MDLSSSFIASNHLSALSPLIACENETGSSSIPKSTSDSCRYTT*
>comp596414_c0_seq1
MKCGNESIAFVLILTKLCCQDCDDRWWNFELNCTRDLARCQSVVNGFLGVISSAAMFLILQGGCKDLAAVTIVYGLFCCLVFFRLFDLPCI*
>comp60064_c2_seq1
MHPQVSQSNSPTSTTSAASGYYLQRRGPEQMQRQGSSGTSSNGSAVNNTKGGGLPTQGLLHPAQFAAMPQSGNHPFGPLSFPYVHPGPTAVQVKPAEQKQPAGE*
>comp17026_c0_seq1
MGLNNDFSSLLDVNPPKLGKLQNVQKSEQGSVFDNHIIIPHFSSPPFIKLPKKGKVYLKHSPPLPSPSKHTPRG*KNHK*KTE*QDMDSDSKIILETTTTRRLEQHPI*
>comp47218_c0_seq2
MDVRLVHLFTGWSYSLLYIRKAIKWPFNNHQVYNVRPLKDPRFQLNLGPCLAFLSQSQFQNSQTSLYSVQCSAEYLHFYFLL*
>comp46467_c1_seq1
MAIFKVYACNLMRTHRHREQFSCDLCCGRVGSQT*
>comp22156_c0_seq1
MEDDDDWARFQSNFRRRDRVLEGKSKLSHTVHCPYFPEEKQEYW
>comp1815_c0_seq1
MQSFNSKAKNGKQGTCMRYTECNKDQFRDYTRAQV*YA*EGWII*KVVLQIGYKQRQYQ*RNTSLCQRDVSRELRIVIINLVQICHLEYLLRALNRKFQPDLTLVYAFVQRDIT*FNTCG*ALVIFQLQTTIKDTKLLQNTKTSHSP*R*PIVKPDQAHLNEFMNQIKEEGRSKNAENISAVKKINK*
>comp146809_c0_seq1
MGRTIFFKYCTFLLAILTLLCSFYMNCVIASVYTVGDQEEWSSQTNYASWAEGYNFSLGDVLVFKYVKGQHNVYEVTEDTFRSCDASSGVLAKYESGEDRVDLNEVKRYWFICNIAGHCLGGMRFGIEVKESGNVTPATNSTDGALTPQVRPIPSGNSCTSYMSGKWRVIGNFIPFGLLLFNLYFVENFG*
>comp106058_c0_seq1
MLMNFFTSLSHVINFNMRSYTLQWFFGVCYLHANRCSDWIQVSNAIVCGKTVCSFLPYLIVAEKSLLFQLLFLMV*
>comp53382_c0_seq1
MADRVHPHYSPPVSGESQTTSSPVSAATAAKPAPPPPEKPISPTGTYVIQIPKDQVYRVPPPENARRYNNYTRRKNRRCRCCCCLCWLIGIIFFLIVLLAVAAGVFYLVFRPKAPSYAVDGVAVRGMNLTSPSSPAAFSPEFDVAVTANNPNGKIGIYYEKGSSVEMFYNDVRLCDGALPAFYQPSNNATAFKTALRGNGVELVSSDWRALVNAQNKREVPLTLKLRAPVKIKVGSVKTWKITVKVDCDVTVDKLTVQAKIVKKDCSYGVELW*
>comp238237_c0_seq1
MDCCWLLLIFLKDDSFYSLHCIKTIDASHMDDMCFKDVKLYGIPKPSLQIEIQSL*
>comp58164_c0_seq1
MNSPIHAPSSPSSSSCSYIRPPPCLTYASRNSKFPLLLPQAICTSQKMYRCSGTHVEASSNTNPLKSYVVGRCSPGWSEAQPLVTKQSLNRHLWPVEALVNPTVQDVSDTPLIGDDKIGVLLLNLGGPETLEDVQPFLFNLFADPDIIRLPRLFSFLQKPLARFVSVLRAPKSKEGYASIGGGSPLRRITDAQAEELRKSLWAKNVPAKVYVGMRYWHPFTEEAIEQIKRDGITKLVVLPLYPQFSISTSGSSLRLLESIFREDEYLVNMQHTVIPSWYQREGYIKAMANLIEKELKGFDCPEEVMIFFSAHGVPLAYVEEAGDPYKAEMEECVDLIMEELEKRKITNAYTLAYQSRVGPVEWLKPYTDDTIVELGKKGVKSLLAVPISFVSEHIETLEEIDVEYKELALKSGIEKWGRVPALGCEPTFISDLADAVIESLPYVGAMAVSNLEARQSLVPLGSVEELLAAYDSQRRELPSPVMVWEWGWTKSAETWNGRAAMLAVLLLLFLEVTTGEGFLHQWGILPLFR*
>comp31161_c0_seq1
MQYSIIKFCTVKTIQGSFASHWQSELILYQLHFEVRSQLWKKG*
>comp33734_c0_seq1
IAPLAVGGRRARTRLRSPLRANLGLVIPAAVPSSTRAATSSLDWWSGYEWIRVSVRNTRPFFKLSGALGTSGG*
>comp20065_c0_seq1
MSHYYINSEIQMLLKYGILKYTGQDQSIKFYFPNYYFQSFVYSIWILSTNL*
>comp233390_c0_seq1
MDFLRESLFWICKETDQPCCIPELFHVPCGINLLRFGRFLILH*
>comp56875_c2_seq3
MTTLSIPVKICFQPSTSTSFLHFQSQTKPQTLTLPRKTSIACSASEQPQKQQNQPTNKKSASDGEKGIDPAGFLTKRGISHKAFGQFLRERYKALKDLKDEIFNRHINLKEMASGFEILGMHRHPEHRVDYMEWAPGARYCAIIGDFNGWSPTENCAREGRFGHDDYGYWFIILQDKLREGEKPDKLYFQQYNYVDDYDKGDSGITIEEIFKKANDEYWQPGEDRYLKNRFEGPAKLYEQIFGPNGPQTLEELEDIPDAETRYKAWTAQNEPTPYDVIDSGKEYDIFNVIIDPQWRERIRALKPPIAYWIETRKGRKAWLKKYIPGIPHGSKYRVYFNTPNGPLERVPAWATYVQPDVDGSQAFAIHWEPPPEHAYKWKHTSPKVPNSLRIYEAHVGISGSEPKISSFNDFTDKVLPHIKEAGYNAIQLFGVVEHKDYFTVGYRVTNFYAASSRYGTPDDFKRLVDEAHGLGLLVFLEIVHSYAAADEMVGLSLFDGSNDCYFHSGKRGQHKFWGTRMFKYGDPDVLHFLLSNLNWWIVEYQIDGFQFHSLSSMIYTHNGFASFTGDLEEYCNQYVDKDALLYLILANEILHALYPNIITIAEDATFYPGLCEPTSQGGLGFDYYVNLSVSEMWSTFLESVPDHEWSMSKIVSTLISNREYADKMLMYAENHNQSISGRRSFAEILFGEINEHSLHYKESLLRGSSLHKMIKLITLTIGGRAYLNFMGNEFGHPKRVEFPTPSNNFSYSLAYRQWDLLAKDGVYRDLFSFDKDMMKLDENERLLSRGFPNFHHVNDSSMVISYIRGPLLFIFNFHPTDSYDSYSVGVEEAGEYQVILNTDEIKYGGQGSINEDHYFQKTVSRRVDGFRNCLEVPLPSRTAQVYKLRRILRI*
>comp56969_c1_seq1
MRFFLEFVSCCGSATLRSTDSSHPLQEEEEDEWSLVPPTSRTLRRNKRGRVGRLPAAPDWKPSLGPISENNAVPQRERGDPRHARDVKRRSTAAAAKVHHRNYSDDYDYRRAAMPTIMPAFSPTPFMF*
>comp184144_c0_seq1
MLCHLFFLSILCSYTSLSCSNFVFTSKFHSFLLFWIRGAFNFPYYR*
>comp32635_c0_seq1
MAFRPTMGHWIALLNNGFRGGSKAAYTTSTAPKMKAYAPTADYGYVHHQHQQHGKSSKSATGDYVPVYVALGMIALSTGLGLHTAWQQLRNSPTVRVKKERRETLPEVVEPEHVVEEADKFMRKSFFRKVAHVQEHNYPDKHLIPDPIRKDAYAYRPRVETLKSVGIDPSHV*
>comp148_c0_seq1
MEVETMFRYKLGIVIVVVNNNGIYGGFSEEVWKDITSAGPITKFSPPSSLVPNTHYEALAKLGNGKGFFCTTVDQLQEAISEAFKVEDAPSIINVMINPSSDRKPQSFAWLTESKL*
>comp58145_c0_seq1
MMYWCVSVSPSLSLSLPSNFSSKVPKWFMPFHLSPFHFDSTINFSFRPSPRVRLHCSQERSITPPAYDQDESIGSVTSVSITDDHILSSNTPVLEQNGLPPLVSALKASAEQDTASFHFPGHNRGHAAPASLTRLIGVRPYVHDLPELPELDNLFCPQGPILEAQSQAAKLFGSSETWFLVGGTTCGIQAAIMATCSPGEFLILPRNSHLSAISAMVLSGAVPKYIIPDYKNDWDIAGGVTPLQVLEAIQELEREGKKAAAVFITSPTYHGICSSLSEISELCHACKIPLIVDEAHGAHLGFHSELPNSALQQGADLTVQSTHKVLCSLTQSSMLHMSGNIVEKEKISRCLQTLQTTSPSYLLLASLDAARAQLSESPDIVFNQAIKLAYEAKCLLKRIRGISVLENSSFPTFPAIDPLRLTVGFWQLGLSGFEADDILYRDYGIVCELVGNQSITYALNLGTCRDHVQRLVLGIKHLAATYASIQQPEESALTGHAPFDDIIMGLIPRDAFFASKRKVTMRESLGQVSGELICPYPPGIPVLIPGEIITEEAVDYLLHVRSKGAVISGASDPLLSSIVVCNV*
>comp297247_c0_seq1
MVPLRLYIKFCFYVK**LIYLSFHVVYV*SCPFNS*SPST*VSGSASVYKYC**QPK*RRNYTS*ITARDESEIYYLVLHCTIYNMISN*
>comp517556_c0_seq1
MVRPKFGNVKPTVSSYYSGAQFWWCTMPTQFFPYLNVILRYIL*
>comp363598_c0_seq1
MRRSSYFRHHTQSINPKYETRLNNFSKHVLHLTKIPASIINAFMRNKKYQRTCLEVMKFKNLMPGHSSFIKLFN
>comp53875_c0_seq2
MKSGPVLSRKDVKYHEPEFWKFGEEGTKYFRHATGQIYAISKDLATYISINQPILHKYANEDVSLGSWFIGLEVEHIDDRNMCCGTPPDCEWKAQAGNTCVASFDWSCSGICKSVEKIKYVHSKCGEGDGALWSALF*
>comp25867_c0_seq1
MKLLSKFFVGIPLNFPYVNYVWKLLRLYVIKPEVVLITLCIVILCMYIQFVDVWSRSLVDRIRLSVSGNVTSRGTPKMLKGLGDYDSSSTWELAEDNVHVYAIQGRRPR
>comp531751_c0_seq1
MYSSKRNRLRPDMISVPQGDVKHTGHVGLDGAYFGDISFLGGSKYEHVPHQVVAPYKPQTDTDDTSSISTDKAPLLSNITHNGSCASG
>comp17193_c0_seq1
MVIMLCFNVYFRTTKLCYFFSWSKIGVQLD*
>comp237811_c0_seq1
MSWKLTLESEEGKTLTREGEDEMFKLAQRYQKRYPDLLPKTYSNSTFLFKFTQTQRTEESAKHFTTGLFGKDQSRQVWFPEALDKDPILRFYKLCERWKEDVKNNESSKEELIAYKNTAEALFMTREISRHLRLNYTLSYDD
>comp51426_c0_seq9
MAGVNPNGAADFPAVATHGGQFIQYNIFGNLFEVTAKYRPPIMPVGRGAYGIVCSLLNTETNELVAIKKIANAFDNHMDAKRTLREIKLLRHLDHENVIALRDIIPPPVRREFNDVYIVNELMDTDLHHIIRSNQSLSEEHSQYFLYQILRGLKYIHSANIIHRDLKPSNLLLNANCDLKIIDFGLARPTLESDFMTEYVVTRWYRAPELLLNSSDYTSAIDVWSVGCIFMELMNKKPLFPGKDHVHQMRLLTELLGTPTDADHGLVKNEDARRYIRQLPQYPRQPLARVFPHVNPLAIDLIDKMLTNDPTRRITVEEALAHPYLAKLHDVADEPVCMEPFSFEFEQQQLDEEQIKDMIYKEALALNPEYS*
>comp240667_c0_seq1
MTFEHDFRNNVNIESSMSNGLANAGRETDRQTERKKNRVKKTARRITASVKGDIFGRKAGGVYYKTQRSIYYSHFTNRKDFTFSFSFELSRKAFYFTNNQSSP
>comp125733_c0_seq1
MSYFLSIKNLTIRRVGLGMLYKYFCVILSCLAHLITSQSPPNFFFSIQTSFVHWIYF*
>comp30477_c0_seq1
MAEVDDTQKKKRTFRKFLFRGVDLDQLLDLPAEQLTKLMHCRARRRFSRGLRRKPMALVKKLRKAKKEAPPNEKPEVVKTHLRNMIIVPEMVGSIVGVYNGKTFNQVEIKPEMIGHYLGEFSLTYKPVKHGRPGIGA
>comp56660_c1_seq1
MLNFSGLLFFLISFCVWGLSYLILHPLYSSRKDSDFGIAKTVR*
>comp296840_c0_seq1
SESRAEHILDERDQRSLVQIYRLPNFQGIEHFLPLPLQHHKSATYLQRRR*
>comp54884_c1_seq1
MGLTIFCFDSLSSYSVYCIDCSVHSVESENRFGNQQGCYVLFFIFYFTKKFLLVFLLITLFCLLWRS*
>comp282048_c0_seq1
MTKLYARHKNPKQNNLIDANFTNKMKHIHARRTREMNHLRNREIRLRRF*
>comp334866_c0_seq1
MEGLRTFYFIALLWVPISAILFFCFFFGTIWLEVFLTSSRLL*
>comp48878_c0_seq1
MLSRKEMALIIIITLISVFFSALLPLCASLQIQLQPSLQHQVNAHQHLSLPTLPRKIRFTEQVEEYNEARDLESHKQKVYLSLSGKQHDRKQHVLLGSRETMQEWVAGDDPSQYFSMDYTRVRRRRPIHNKNLPVGP*
>comp48633_c1_seq2
MAFRVPTVDVSVVDLTVRLEKAASYDDIKAAIKEASEGSLKGILGYTEDDVVSTDFVGDCRSSIFDAKAGISLNNNFVKLVSWYDNEWGYSSRVIDLIRHIASVK*
>comp3129_c0_seq1
MSNIQIIMHQGAIVRFFNYTCLSFLNIKLGIEKIKW*
>comp353466_c0_seq1
VLPIRYDICIFSSCFSIVGTTQRDSILSLLIHCSQEYSS*
>comp50269_c0_seq1
MTKKAQLVFVPCPGMGHLVSTIEFAKLLINRDERLWITVFVMKLPFDTTTGAYTESLTSSSFSERVQVINLPELHIHSPSKSDPGSDMNALIQNQKPHVKEALSNLVHSNSGPESPRLAAFVVDMFCTTMIDVANEFEVPSLVFFTSGAAFLGLTLHLHTLCERDNVSTTEFKNSDIELAIPSFSNPVPSKVLPTVVLEKEWETFFLNYARRLKEAKGIIVNTFEELESHAVHSFSCNGDLPIIYPVGPILNLKVHQDQASHNDIIKWLDDQPPSSVIFLCFGSMGSFHEDQVREIARALEDSGARFLWSLRKPQQKGSMALPSDYPDLAAVLPEGFLDRTAEIGKVIGWAPQAQVLAHQATAGFVSHCGWNSILESIYFGVPIAAWPLYAEQQTNAFELVCELKMAVEIALDYRVGGFNVGSNVLLSADKIERGISNVLEKDGETRKKVKEMSEKSRETLIEGGSSYFYLGTLIDYVMNKV*
>comp168474_c0_seq1
MQFLSEIISFICHVVVKCNYVWDQIAAICLILYHKTYLYIFNFETCVLYWITKQSGVAVFSHAI*
>comp50989_c1_seq1
MLGFFGENHPLSLIARTISSKQLKGPFYRMVSWVSYGHLAISLLGLETTIKRNASGT*
>comp47995_c1_seq1
MSNQTSSPTHITDPYQHLHIVHNPDGSLTRLFEIPQTSPASDPTLPISVLTKDITINQSNNTWVRIFLPRKAILNHSSTSNHDHKLPLIVFFHGSGFILTSAASTMFHDFCVNMADSIEAVVASVEYRLAPEHRLPAAYDDAMEALRWIRSSQDEWLTQYADYSNCYVMGNSAGATIAYHTGLRAAEEVNHLEPLKIRGLILRQPFFGGTKRSGSELRLENDPALPLCVADLLWDLALPFGVDRDHE
>comp53662_c0_seq1
MIQLHRSLFSSTTTVSAPSFSFSTPTSAPLSLRHFMLQFMALHNSPNTHLPGSTLGIGKSMQCQKWAIANNNLNIGQSFHSFSGISLGSRRTVVVPGFARRELCESVGSLHNFSFLCLENGIGRSLMNDGVFPKRFSSHVQKVANNTQKKRAKALVVHGKDRDASSSTSASKDVNTDTSRKSLVGDKIKLKKGSPKSTPPVDSDKQDSKVTVTKKKKQSKSKKNSKHSAKNSPKEVAGAEVSRNSSKGNTSSTSDIGQSSSHILKNSAGSTLEEIPDNSASMKHLSKKNSGNTSQIGKVKLPGKITHKQLYPPSGKSVLVVESVTKAKVIQGYLGDMYEVLPSYGHVRDLAARSGSVRPDDDFSMVWEVPSPAWTHLKSINVALSRAENLILASDPDREGEAIAWHIFEMLQQQGALHDNISVARVVFHEITEHAIKSALQEPREIDVNLVHAYLARRALDYLIGFNISPLLWRKLPGCQSAGRVQSAALSLICDREMEIDEFKPKEYWTVEAQLNRKGLGSNKDLAFPAQLTHFDSKKLNQFSITSDTEAKDIKNEINSADFQVISLKRNKLRRNPPTPYITSTLQQDASNKLHFTASQTMKLAQKLYEGVELSDGKAVGLITYIRTDGLHISDEAVANIRSLIIERYGQEFASEITRKYFKKVKNAQEAHEAIRPTDIRKLPSMLVGVLDEQVLKLYTLIWSRTVACQMEPAIFEQIQLDIGNADESIVFRSAGSRVDFPGYRAVFTDMDTEVLQDKESDGSNRDQAFGVLNALKLGDPLHLVQTELKQHHTQPPPRYSEASLVKKLEELGIGRPSTYATTLKVLQDRNYVTVKSRVVSPEFRGRMVSAFLSHHFSEVTDYSFTADMETELDNVSAGVTEWKGLLRDYWTRFKSYCERTSNVHIHQVEKMLEKKFGDYLFASLPDQSRVCPSCMEGTLIFKVSRFGAGYFIGCDQHPRCKYIAKTLYGVEEEDDTPQNSTAIEEPKLLGVTSGSNEKVLLKSGPYGFYVQLGEDRKGYLPKRASVSHIKAVDSITLGDALELLQYPLTLGNHPKDGQPVMLKLAKVGFSVRHRRTIASIPKNMKPSDVTLEKALELLSGKDVRRCGRPKGKPKVEAVEAL*
>comp46552_c0_seq2
MIVLNVYLFIGRKSAIFSVCSLVFADYF*
>comp48991_c0_seq1
MIPCHLHLRWKQYFRNSFQNNARLHSLSFLELQLDCHCTKHWKISTSITMMYV*
>comp36754_c0_seq1
MDQHNILNFYKRKHYIFFFIKEEVIISLALAGFSLLVCIFINGCGGPFNTRLMKIEK*
>comp492219_c0_seq1
NKVLQKEYNSEVFNTSINTLQRIEAVVVIYIYFSSHNAILKWRLHVKTKQRDSQRNR*
>comp206463_c0_seq1
MLAKSLNLSQIIMEVDSSSALKLIKNGCAPTHPCAPLVDVISMTLASANWEVQWQHTLREGNCCADKLAKHGHDLEL
>comp55603_c0_seq1
MVAGNGLFYPIFGFASLVFFIYMSFGDLRFGFEEEPKLGFVERNGTQFRLDGKAFYVNGWNSYWFMVQSVDDYSRPKVREMLKAGTKMGLTVC
>comp485053_c0_seq1
MKGLARIGGLSDQLICKAKWKGEIGGWMVGSVCHLNVVEVLSIIAGFRQVTW
>comp184608_c0_seq1
MTETSSQFLMCNAEGGKEEGEQQQSQKNVVNFLNTSELQNTTPYSNIRN
>comp245335_c0_seq1
MLLTHTKIVHIQILPCILTSTYISHMSRPTRYFLESRLKSAPPSTIYASS
>comp58269_c0_seq1
MLHFLLLLLLFLSPPPLTLSLNQDGLFLRRAKLQLSDPDNTLSSWNDGDATPCRWRGVTCHPLTGDVTAVNLSDSSLSGPFPISLCRLPSLSSLTLFNNFINSTIPAAIATCNRLRHLNLSQNVLVGPIPDTLSRIPTLRQLDLSFNNLSGDVPASFGEFRQLESLVLVYNFLNGTIPSSLGNISTLKVLQLAYNPFTQGPIPSEFGNLTNLVDLWFPGCNLVGSIPESLGWLTRLRNMDLSQNMLTGSIPKSFVGLKSIVQIELFQNSLSGELPSGLSNLTVLERFDASMNELTGTIPDELCSLKLASLNLYNNRLEGSLPESIARSSNLYELKLFNNKLVGRLPSALGDNSALLHVDVSYNQFSGEIPVNLCGGGQLEELILMYNSFSGKIPQSLGNCMSLTRVRLRNNKLSGVVPDAFWGLPHLYFLELIENSLSGHISNAISGARNLSSLLISKNQFSGSIPGEIGSLDNLVEFVGSHNNFTGRIPASMVKLSQLGSLDLSDNKLSGEIPGGSRYWVKLNELNLAKNRFVGNIPSELGSLPVLNYLDLSFNYFSGEIPVQLQNLKLNLLNLSNNQLSGDIPPLYANENYRMSFFGNPGLCGHLSGLCPISGESKNRSYVWLFRSIFVLAGIVFIVGLAWFYLKYRNFKKLKRRFNISKWRSFHKLGFSEFEIVKLMSEDNVIGSGASGKVYKVVLSNGEVVAVKKLWGATRKENGSVGFEKDEFEVEVETLGKIRHKNIVRLWCCCNSGDSKLLVYEYMSNGSLGDMLKSSKRSLLDWPTRYKIAIDAAEGLSYLHHDCAPPIVHRDVKSNNILLDGEFGAKVADFGVAKIVRGVSQGAESMSVIAGSYGYIAPEYAYTLRVNEKSDIYSFGVVILELVTGKPPIDPEYGENDLVKWVSSTLEQKGLDHVIDPSLDAKYREEISKVLSVGLLCTSSLPITRPSMRRVVKMLQEATTVPKSRSGKDGKLSPYYHEEASNHQGSIV*
>comp48022_c0_seq1
MNEIEGNFGLNLGQTQNRNWMGCAICLSVNGRSYLAITIAPIVTLSTCYFKNITLSM*
>comp298673_c0_seq1
MVLRRTVAFLAPARTAMAFALEIMALLAASITATGARTIKKNPTTLHCLSLDYRFYRVLSQDQIFF
>comp48406_c0_seq1
MERDLHIGDEESSHQNVIGERVHEVSQLTIREPHISQTKARRKDAKMETQNYRFKSGLEVSQKNHLSKGVHAMCVKNLVTTIEVA*
>comp46397_c0_seq1
MEHLIHIGLLCTLHDPQLRPSMKWIVEALSDISSKLPALPSFHSHPLYISLSSSSETSPSSTRATGSGTENASTLTNYTSSNYVTATGETVYVTAEAEHRNSGISSSKSRSIHQ
>comp386727_c0_seq1
MKSCLHCRKRGLFLDWLRNGRGLPPFMQPTLINQKKKK
>comp40796_c0_seq1
MHHPPTTWLLLHNLECNYLTYANIITLPQHSPFNRVSKETMKVEVFHFR*
>comp58990_c0_seq1
MANLVPGVLLKLLQHMNTDVKVAGEHRSSLLQVVSIVPALAGGELFPNQGFYLKVSDSSHATYVSLPDEHDDLILSDKIQLGQFVFVDRLEAASPVPILHGVRPVPGRHPCVGSPEDIVATHSLGFLDNTNNNNNNNN
>comp8640_c0_seq1
MLLKMLAFYTMLNCITVHVSFTVLMDYVCKTMKLGNDKMILGNMQAKPIVGSATRKIVVHVVPVLFFSND
>comp57581_c0_seq1
MELPSSFILSLKPYSSPACNYSFSSSFSPFPIQIFIKNPKTRNPTSQSFRIFAVALDPPQELPKNSPQRLLKELAEHKKVTSPKKKGPPRRFILRPPLDDNKLANRFLNSPQLSLKSFPLLSSCLPSSRLNNADKTWMDEYLLEAKQALGYPLEPSEMLADDNPAKQLDTLLYLAFQHPSCERTKARHVRSGHSRLSFLGQYVLELALAEFLMQRYPREPPGPMRERVFELIGKRNMPRWIKAASLQNLIFPYDDMDRLVRKEREAPVKSVFWALFGAIYLCFGMPEVYRVLFEVFGMDPDAEDCQPKLRRQLEDVDYVSAEFEGKLSWQDMVAYKPPADALFAQPRLFRACVPPGMHRFRGNIWDYDSRPQVMQILGYPLEMADRIPEITEARNIELGLGLQLCFLHPSKFKFEHPRFCYERLEYLGQKIQDLVMAERLLMKHLDAPGLWLQVRHRRFLMNKFCGRYLRGKDLHRFMIYSEQVQDSYEHNRRLRNPATTAVQQALHGLSYTVYGKRDVRRLMFEVFDFEQILPKAV*
>comp49787_c1_seq1
FTRCIAKILPTRVTAKTIGDEQLSGFNNIS*
>comp36120_c0_seq1
MFNYARDHQPCIIFMDEIDAIGGRRFSEGTSADREIQRTLMELLNQMDGFDSLGQVKMIMATNRPDTLDPALLRPGRLDRKIEIPLPNEQARLEILKIHAGPIAKHGDIDYEAVVKLSDSFNGADLRNVCTEAGLFAIRSEREYVMQEDFMKAVRKVADNKKLESKLDYKPV*
>comp34864_c0_seq1
RENQCCKKLVAKTSKKRQNNPKKKKCRIAGLYQLALFIYFS*
>comp210465_c0_seq1
MAPKSCSSIFSDLSPAVFTTILLISVGIIAFHFHFGDGKKVEFNYARKAKNYEDLIEVRNI*
>comp55267_c0_seq4
MYLLTLLTRQNSSSATRHLSSAATAAVTASKLHDRYSFKPPPSLSAEPQNPNDTPTKPKKKPKPKYRPHSSLDRTGRKPARSDLPFDFQFSYTESSATVRPIGLREPKYSPFGPGRLDRAWTGVCAPVVDPKVECLEGEEDPKNEEKRKKMWGLIQGKPLTDAEKKALVLQCRKCKTKRQINLGRDGLTHNMLNVIHGHWKHAEAVRIKCMGVPTVDMKNVCTQLEDKTFGKVISRHGGTLVLYRGRNYNPSNRPVIPLMLWRPHEPVYPRLIKSTIDGLSIEETKEMRKRGLAIPALTKLAKNGYYGDLVTMVRDAFLSCELVRIDCQGLERSDYKKIGCKLRDIVPCIPVTFDKEQIVVWRGKDYKPSNDGYFLKDQESFDDFDGDLST*
>comp55522_c0_seq1
MSSITCQCSWLLSNSSPVVVANDKITDVRPTNFAQIPSWISLKSSHSSLRTHKNQQGQVENLHLISLAKEGKLREVHEFIRSMDEAGLSINPRSYEYLFKICGKLGALSDGKLFHSRLQRMANSNKFIDNSILQMYCDCRSFRAADRLFDEMVNRDLFSWATIISAYAAERHREKAIRLVLRMLDLGIRPSSSIFSSLIGSFADPSVLDLGKQIHSHLIRIGLTANVSIETSISNMYVKCGWLGGAEVATNKMTRKNAVACTGLMVGYTQAARPRDALLLFAKMISEGVKLDEFVFSIVLKACAALGDLKMGRQIHGYSVKLGLESEVSVGTPLVDFYVKCARFEAARQAFESIREPNDFSWSAIITGYCQNGRFDGALEIFKTLRSKEVLLNSFTYTNIFQACSAVSDLIYGAQIHADAIKKGLVAYLCGESAMVTMYSKCGKLDYAHQAFLAIDKPDTVAWTAIICAYAYHGKASEALRLFNEMHESGVRPNAVTFIGVLTACSHSGLVKEGKEFLDSMIDKYGVDPTIDHYNCVIDIYSRAGLLQEALEMIRSLPFEPDAMSWKSLLGGCWSRRNLEIGMIAAEKVFQLDPLDSATYVIMFNLYALAGKWDEAAQFRKMMAERNLKKEVSCSWIIVKGKVHRFVVGDKHHPQTEQIYSKLKQLNSAVSNGVESLLSEEDALCDFTERKEQLLDHSERLAIAYGLICTAAETPIMVFKNTRSCKDCHDFAKRVSMVTGRELVVRDANRFHHIKSGECSCHDYW*
>comp414348_c0_seq1
CLLGGLTLSTVSISTGSFDYFQRGHSITSTSPSLILYPEKKIESSKTFPGRRKKGGSSSKSPRNEVTHRRAPNSLRVQRDLQVVRWEEARTNGKRSGEDQILH*
>comp49896_c1_seq1
MAVSNSHRLFTSFPFESRSDPHFSAPPTFDNLPHRRFAGSGGGSAAFHGLSSLILRFPPNFQRQLSTKARRNCSNIGVAQIVAASWSN
>comp47594_c0_seq3
MDCLVLPVSLIRRRSTGSRLGYRPLSDDGLDQEIESNSPVTVVVGKEKRVFLVDPFILQENPFRILMDTSMRKDPPEKDHFHFTTSQRRVIFVDVDAILFEHMLWLMHNDCSSLFQLNLKEIIDFYAQDM*
>comp48029_c0_seq1
MPPRRCTARHYSDLESDSDYDNDNKRMRCLSCEEDYEGDDAGTCKECYEEANETEEEQKREIEELKAKVSFLKLLSPIDHSYRFSPNAPSSTDVLLLASDHASAGIPVPVPAHKAVLVSRSPVFKAMLENDMEESRSGTIKITDVSYDALRSFVNYLYTAEACLDDQMACNLLVLAEKYQVKHLKAYCEKFLMTRLNWDKAVANYAFAHQHNAKQLLDAALSVIIDNVDRLTKHEEYAELVDSNPRLVVEIYEAYLAKQVNTAACRDSSMKQ*
>comp43024_c0_seq1
MIYIEGFKKIHYKQIYPKTLPHLSEEKWCICSILYTGRSDQ*TSHV*AQFFFWLNESKDEQIMYLKFIHINCLTNKLESIRSQQVEAYEPRSTNNINLTKSYDA*
>comp51598_c0_seq1
MGKGVISDDEDEVELEEDDREPADGEGLHGREVDEEDEDEEEEGQDEYEKDGFIVDDIEDEEEQDEEEERADSDEERQKKKKRKKKEEYVLDEDDYELLEDNNINIHRRKESKKFKRLKKGQRDTEDEPSGLSDEEEFVGSGKVGRTAEEKLKRSLFGDDEGAPLEDIAEEEEQGEEEEDADIGEDDEMADFIVDEEEVDENGAPMRRRKLKRKKTRQAPGVSSSALQEAQELFGDVDELLQTRKQKLELHEYRETRLEDEFEPIVLSEKYMTEKDDRIRELDLPERMQISEESTGAPPLDGSSIDEESQWIVSQLGNGAVPWIYKKNTTSQNEGKDLPINKDDIIRFLELHHVQKLDIPFIAMYRKEECLSLLKDLERPEAGDENWDKNDKAPTLKWHKVLWALQDLDRKWLLLQKRKSALQSYYNKRFEEESRRVYDETRLNLNRQLFESVMRSLKEAESEREVDDVDSKFNLHFPPGEAGVDEGQYKRPKRKSVYSTYSKAGLWEVASRFGCSSEQLGLYLSLVDLRSHELEDPKETPEEMASNFTCAMYDTPQEVLKCARNMAAVEISCEPSIRKHVRTHFLDHAVVSTCPTADGNTTIDSFHQFAGVKWLREKPLSKFEDAQWLLIQKAEEEKLLQVTIKLPEEYLNKLIDQFNEYYISDSVSRSAQLWNEQRKLILHDAIFRFLLPSMEKEARGVLASKAKHWLLMEYGKALWNKVSVGPYQQKENDLSSDDEAAPRVMACCWGPGKPQTTFVMLDSSGEVLDVLYTGSLTLRSQNVNDQQRKKNDQERVLKFMTDHQPHVVVLGAVNLSCTRLKEDIYEVIFKMVEENPRDVGHEMDGLTIVYGDESLPRLYENSRISSEQLPSQQGIVRRAVALGRYLQNPLAMFATLCGPRKEILSWKLSSLESFLNPDDKFGMVEQVMVDVTNQVGLDINLAISHEWLFAPLQFISGLGPRKAASLQRSLVRAGAIFTRKDFLTEHKLGKKVFVNAVGFLRVRRSGLAASSSQFIDLLDDTRIHPESYILAQELAKDVYEEDGTGDANDDDDALEMAIEHVRDRPSYLKNLDVEEYAAGKKRQNKIETFYDIKRELIQGFQDWRKQYEEPSQDEEFYMISGETGETLAEGQIVQATIRRVQAQKAICGLESGMTGILMKEDYTDDWRDIIELSDMLHEGDMLTCKIKSIQKNRYQVFLVCRDSEMRSNRLQSNHDLDPYYREDRSCLQSEQDKARKVKELAKKHFKPRMIVHPRFQNITADEAMEFLSDKDPGESIIRPSSRGPLFLTLTLKIHDGVYDHKDIVEGGKEHKDITSLLRIGKTLKIGEDTFEDLDEVMDRYVDPLVTHLKAMLNYRKFRKGTKAEVDELLRMEKAEYPMRIVYSFGISHEHPGAFILTYIRSTNPHHEYIGLSPKGFRFRKKMFEDIDRLVAYFQRHIDDPQHDSAPSIRSVAAMVPMRSPAAGGSSGASVGSGWGGSNNEGGWRGHSYDRDRSSTPGSRTGRADYRNNGNRDEHPSGVPRPYGGGRGRGRGSYNNSSRGHSSNNERQDAGYGAGRWGSVTKDGDDGLSNFPGAKVQNSPGREAFPGGWGGGASTSDNDGWGHGNGGAGASDAEHGSSGWGTGPKRAAENGWSGNAGGSAGW*
>comp41909_c1_seq1
MIL*RS*LKLLNVSHWISTGPHLNFSQTAHQIITSHT*CETIITLLRRVFNLNVQKTFIMERALP*
>comp12899_c0_seq1
MSIFAAILSFLFWFIISNNEPLKLRKKLITTSPSENLMVYISYT*
>comp46172_c0_seq1
MCFSKLMRFQNPCLSLLHVLLQPPVPPPSTFSSFSLPFTTPPPSATRFTTQASFSAPEMVKAIRVHELGGPQVLKWEDVEIGEPKEGEVRVRNKAIGLNFIDVYFRKGVYKAPSFPFTPGMEAVGVVTAVGAGLTGRQVGDLVAYAGQPMGSYAEEQILPANKVVPVPSSIDPVTGASIILKGMTAQYLLRRCFKVEPGHTVLVHAAAGGVGSLLCQWANALGATVIGTVSNKEKAAQAKEDGCHHIIIYSEEDFVARVNEITSGNGVEVVYDSVGKDTFEGSLACLKLRGYMVSFGQSSGAPDPVPVSSLATKSLFLTRPSLMQYVVTRDELLEAAGEVFANVASGVLKVRVNHTYPLSEAAKAHADLENRKTSGSVVLIP*
>comp89597_c0_seq1
ILSKKHRSLNGWELNNQLKIENCASTTSNTKALNQRPRRNERNRKSNN*
>comp59545_c3_seq2
MEDSLYSPTPSSQQHLLDQKAETEHPSPNTKSPKKLALLPLVFLIYFEVAGGPYGEEAAVGAAGPLFAILGFVIFPFIWSIPEALLTAELATAFPGNGGFVIWANEAFGPFWGSLLGFWKFFSGVINLASYPVLCIDYLKLVIPALSSGLPRYLSIFFSTTVLSFLNYSGLAIVGYTAVALGVVSLMPFVLLSLISLPRIDPSRWLSLGQTGVKKDWTLYFNTIFWNLNFWDSVSTLAGEVEQPHKTFPKALLSAGLLTCLGYIIPLLAATGAIPLDQENWAGGYFADVAGLIGGKWLKFWMEIGAVLSIIGLFEAQLSSASYQLLGMADLGFIPRIFGERSRWFNTPWMGILISTVIALAMSFFTFTEIISTVNFLFSLGMLLEFASFLWLRRKFPALKRPFEVPMGLPGLVLMCLMPSVLLVYVMTVATKIVYVASAFLTALGIVSYYFLKICKSNKWIEFNRVGDKLDEDENIL*
>comp57759_c0_seq30
MAESNDSVSVDMERIYLGGKEHHIRTGCGSVSVIVYGDHDKPALITYPDLALNYMSCFQGLFFCPEAASLLLHNFCIYHISPPGHELGAAAICPDDPVPSAEDLADQVIEVLNYFGLGAVMCMGVTAGAYILTLFAMKYRERVLGLILVSPLCKAPSWTEWFYNKVMSNLLYFYGVCGLLKECLLQRYFSKEVRGNAEVPESEIVQACRKLLDERKSMNVLRFLHAINQRPDITEGLKRLKCRTLIFVGDSSPFHSEALHMTSKLDRRFSALVEVQACGSMVTEEQPHAMLIPMEYFFMGYGLYRPCQFSDSPRSPLSPSCISPELLSPESMGLKLKPIKTRVSLGV*
>comp56311_c0_seq1
MGVPCLSYLTPSQYRTHSLMPIPSSWKE*
>comp52950_c0_seq1
MGVAALFLALLAPRAIVAGVGIVHLFEWRFDDIAKECENFLGPKGFDGIQVSPVAECAVINGRPWWERYQPFSYKVISRSGDENGFKDMCDRCRKAGVKIYVDTVFNHMSATQPGGTIGTGGSSADTGSKYYPAVSYSNENFHSTCSINNYNDASNVRNCELVGLHDLDQSQEYVRGKIVDHLNHLIDLGAEGFRVDAAKHMWPSDLQVIYSRLKNTQSGSRPFIYQEDIDYGGEAVHHEEYMPLGHVTEFKNGRELSRCFRGQNPIKWLVNYGTGWGMMPSDSALVFIDNHDTQRSDGSVLNYKTPRNYKMAVAFMLGWGYGTPKVMSSYYFDSSDQGPPANGDGSLQNVNFNSDGSCSNRVCEHRWTAISGMIGFANAVQGTSTSNFWSNGNNQITFCRGNKGFLAFNVENYDMNVSSQTCLPAGTYCDVASGVKNGNSCTGKTVTVNNDGTAQISVTGGGEGFLAIHVNSKL*
>comp136458_c0_seq1
QVILKNLRETCLYYDAAIIFEIKEFINQGEKHIDLTELKRREKLVGKKKRN*
>comp57529_c0_seq1
MSSLPDELWRRILELGIGIGIGGLTYKDLCSISISCRRLHRISAEDPLWNLLLSSDFPLTANPFLTSSSSSSS
>comp21648_c0_seq1
MPDSFVSSSKSLSTKLKPTHNFWAIFKRTCEWFHIRFEGEKERSQSLYTSPTTLTISTIKTESTLPQNLCGPLQAQNHINPFNRKYIDKFEWYVSHHCYVVHPRSNCSLNNQKKRKKKVN*
>comp300325_c0_seq1
MDKMDIYLCFHLLCICDLGHPRRIQGGRYFCFYLFLTKLAGIKFIHTS
>comp312089_c0_seq1
MP*DSNRIYSLLRNLKTLDTPFSS*FILCSLGRGGGEYQRYIDFAIG*TGTITIR**W*TPRFRHCIHKQDKLKRIHI*VHQILFKDKDSV*QVSQGWNLH*PLICISGREVNYCSGVD*YK*FVLNLQPKSNEFSLQLFLHYQ
>comp373942_c0_seq1
MHVLIFKGKHNYPKYLAEIYIHWIKLVGNCELFTGTVRTDIADKRS*
>comp58227_c0_seq1
MRRASPPIHLLTAAATDANATATTFIMSSRPPHRGRGRGFSGRSYSGGRGQFVTGDAHFRSVRDDNLGFRRGERGSFGNQMQHQNPPYNPRPPPQFRHPPLQFRLSPPFDQKQAFRPPHHLRPRPPDYRDWEHATTPAPPNCERFIVLSYNILADYLALDHRNKLYFHIPRHMLDWQWRKRNIIFELGLWSADIMCLQEVDRFQDLAEELKLKGYSGIWKMRTGNPIDGCAIFWRTSRFNLLYEECIEFNKLGLRDNVAQICLLEFINQNGSLPSSLTGSSKVVICNIHVLYNPNRGEIKLGQVRVLLDRAKAVSKIWDNAPVVICGDFNCTPKSPLYNFISEQKLDLSGIDRDKVSGQASATIHAPRLFGPIPNSSERSAIGSVQATPIAGDKEVNIEQSNSLSDMKNPDNKDNSWEHQCTHTVLDMSDKSWTNVQYGKESDAYAGKDTQQTAVDNSKIFGEVDSVKEETNPSCSEGRLPIDHVNDEIHDITSMTSSALKSVHTDKSGKGCTEHISDAVLTSNRESLSEKSNLYVPRGNKHMEFDSSPTSLQEDDQSSNLESTNDLLNVEISSTKLSSQISVSDDFEVPHSGFRENPSYELIANDQMNSSSTSYLVDKSHQPTNTDFPLDDKLEKSFLDEIDKAMIGSENIGEDDNAFISALHNAKEGVALDLGPSLKSDLEKSYQFEELDSASNNLLLDAEGNEVEDDLPPRETTYNPSLWTPVEIETATGNAERTFLDHPMPLRSTYTEVMDYSGTRDPHGEPLVTSYNRCFLGTVDYIWRSEGLQTTRVLAPIPKHAMEWTPGFPTKKWGSDHIALVSELAFLKDGTNISRDVK*
>comp56605_c0_seq3
MSESRHADSASPPHSDFQRPRTRTTQTRSWLFTSFFAIAFPVAVAAVLYRLEPFEPVHLPANELSRRTVIAPARNEHMLRGSETMAEGHVAGPEDLAYDAVSGVIYTGCEDGWIKRVTVNDSVSDSVVEDWVNTGGRPLGLAFGHNNGELIVADADKGLLRVTSEKKVELLVDEVEGLKFKLTDGVDVAHDGTVYFTDASYKYSLEDFYFDIMEGKPHGRFMSYNPATKKTTLLARNLYFPNGVAVSPDQHFVVYCETVLRRCRKYYIQGPKKGRIGKFCDDLPGMPDNIHYVGQGQYFIAIATSLTHQWDLALRYPVIRKAAAIIARYVGRLRVEKNGGLLVVNLEGKPTAHYYDPDLSLISSGIQIGKHIYCGSLMYPFVIRLDMEQYPALPTA*
>comp385266_c0_seq1
MEDMDEKSRELADYKVHRENEDKPQTSMRQEDTVEPFSNVEADMENHLLTESKELVEDEMEKEKLDKVNISKDSPQPMVTEAINSKSAEDTIGKFDEGNKNEATEQELNSESVGGREQMK
>comp197619_c0_seq1
MALATEHVKEFWRDSGVFWQAGWDKILDVLGEDPYTFWVYGSMTLIFVVYWTFGGLYTILDLIDKPGMIKRYKIQPGMNEPVDIDKLKKVIKQVLINQTVVGYVTTIFCFKLGMWRGLPPVRELPTFHRFLFDLVVCVLVEEVAFYYSHRLLHWKYLYKFIHKQHHEWTAPVAVTAIYAHPVEHVLS
>comp41729_c1_seq1
MRKSEWSDLGKDFHFNFLAEFTCIRFLSSVQYISLLSLYSNGNFAKEKLIAERREQGRGEEDIRVQSKGKRSDNINSASF*
>comp50066_c2_seq1
MLQVLDLSSCNLTKFPKFSGKFPFLQYLDLSNNSLHGKVPEWLQDMGKHSLNVLKLSQNQLTSMEQFAWNNLIHLDLSSNL
>comp49107_c0_seq16
MFKFKFLFLIVTFLLPVALSKFEAIEPLLHRLDSKRAPPSVQEAAAKGVLKRLLPTHLSSFEFKIVSKDACGGDSCFLINNHNKSSQNGPEIIIRGTTAVEIASGLHWYLKYWCGAHVSWDKTGGIQTASIPKPGSLPLLKDEGLMIKRPVPWNYYQNVVTSSYSYVWWDRERWEKEVDWMALQGVNLPLAFTGQEAIWQKVFKDFNISSEDLNNFFGGPAFLAWARMGNLHGWGGPLSQNWLDQQLVLQKQIISRMLELGMTPVLPSFSGNVPAALTKIFPSAKITRLGDWNTVDGDTRWCCTYLLDPSDPLFVEIGEAFIRQQIKEYGDVTDIYNCDTFNENSPPTSDPVYISTLGAAVYKAMSKGDRDAVWLMQGWLFYSDSSFWKPPQMKALLHSVPSGKMIVLDLFAEAKPIWKTSFQFYGTPYIWCMLHNFGGNIEMYGILDAISSGPVDARVSANSTMIGVGMCMEGIEHNPVVYELMSEMAFRDEKVQVLEWLKTYSHRRYGKAIHQIEAAWEILYHTVYNCTDGIADHNHDFIVMFPDWDPSTNFESGISNHQKKIYFLPPGNRRYLSQETQSDMPRAHLWYPPEDVVNALQLFLAGGKNLSGSLTYRYDLVDLTRQVLSKFANQVYIKAVTSFQKKDFDALHFHSNKFLQLIEDIDVLLASDDNFLVGTWLESAKKLAVNPSEMKQYEWNARTQVTMWFDTNETTQSKLHDYANKFWSGLLESYYFPRASTYFSHLSISLRQNEKFKLNEWRKQWILQSNKWQEGNELYPVKAKGDALAISQALYEKYCVK*
>comp35265_c0_seq1
MMFGIISCWSKEFSLVVVQVSYKVPPVDPYKKFLSIC*
>comp32476_c0_seq1
MHLYLYLVFKHVKDQIILLQLLLFFLLPVTVSLPLPCIHSRSLCFIMYND*
>comp164999_c0_seq1
MSCPHPCSVKNWSTLCRGESETEDKERSGKDCYGLPSRNHKYNLLFFPSLLLSFHFVCLFGGGQVLKTPTSFTFYFD*
>comp57276_c0_seq2
MAKPGRGRRSPPSGSVSGSSSRSRSSSSASGSRSTSRSRSRSFSSSSSASRSSRSRSPPPQRRKSPAEAAKRGRSPPPQSKRTSPPPRKPSPVRESLVLHIDKLSRNVNEGHLKEIFSNFGEVVSVELAMDRTVNLPKGYGYVQFKTRGDAEKALLYMDGAQIDGNVIKARFTLPPRQKVSPPPKASAIALKRDAPRTDNASADVEKDGPRRQRESSPRRKPPPSPRRRSPVPRRFGSPRRPDSPRRRADSPIRRRLDSPYRRGDTPPRRRPVSPGRGRSPSPPRRIRSPARVSPRRLRGSPGRRRSPPPPPRRRSPPPRRARSPPRRSPISRRRSRSPIRRSARSRSRSFSPRRGRPPVRRGRSSSYSDSPSPRKVSRKSKSRSPRRPLRGRGSSNSSSSSSPPPARKP*
>comp51778_c1_seq1
MLEAKCLKKAVVPSTLIENPSPGSLQSTRLALHVSEDPCSCFVYIASGPHIYKLQITLEESSVCKGKESLLIPEYTEIIDSSLVNRCPHRSEIQSIVLAEAESLGYLILGSVDSYGHLIVSKLDASGKDVDRLTYSVLPHDNGIGEGSWSGLCFSPNQWSMAAVARNFCKTIDVYDQDIHLRTLRMLWYPTSLNFMQNVANGNQSSMLAVTEGCQLTIWDLRMKENGGCLHRICGSPGDIFYAVCSSSTGNIAVGGVDRTVTIYDPRRWSALSRWVHCSKYEGWLSQQLTLTISISKGLIMRYFVDNGKKATNYFHLEETQTGLALVSAPTKMFWVDGVIRVAYS*
>comp32717_c0_seq1
LVIYLFIFILFCPLVQKISCTRYHTLGVTSDTFCNY*
>comp54352_c0_seq2
MGLKHDSLQEPTKHNQHMGKQLPSYPFGDSGIDKQFLTAPIKSAVDKFQLLPEFLKVRGLVKQHLDSFNYFVKTEIKKIVRANDSIVATRHPHIYLRFLDVRIGEPSIIVDGSPEKITPQACRLSDQTYAAPILVDVEYTQGSHDKPRKELKANVVIGRMPIMLRSCCCVLHGKDEAELAKLGECPLDPGGYFVIKGTEKVILIQEQLSKNRIIIDTDKKGNITASVTCSTELIKTKTVIVMENEKMWLQLNQFPKKVPLMVVMKAMGMESDQEVIQMVGRDPRYSLLLLPSIEECSKNGVYTQEQALEYLESKVKTPMYSYNSSEKEGRAFSILRDVFLANVLVHQNNFRPKCIYVAVMMRRMMDAILNKDAMDDKDYVGNKRLELSGQLISLLFEDLFKSMITEVKNLIDRILDKPDKAKKFEFCQHICRDSITLGLERTLSTGNFDVKRFKMSRKGMTQVLQRLSFISALGQMTRVSPQFEKSRKVSGPRALQPSQWGMLCPCDTPEGEACGLVKNLALMTHVTTDEEESPLISLCYSLGVEDLELLSGEELHTPDSFLVIFNGLILGKHRRPQRFATAMRKLRRAGKIGEFVSVYVNEKQHCVYLASDGGRVCRPLVIADKGISRVKEHHMKELMDGVRTFDDFLRDGLIEYLDVNEENNALIALYEGDTTSETTHIEIEPFTILGVCAGLIPYPHHNQSPRNTYQCAMGKQAMGNIAYNQLRRMDTLLYLLVYPQRPLLTTKSIELVGYDKLGAGQNATVAVMSYSGYDIEDAIVMNKSSLDRGFGRCIVMKKYTVINQKYGNGVSDRILRPDRTADNAGRMQILDDDGIAAPGEIIRPNDIYINKQSPIDTRIPSTGSAANLPDSAYRPSFQTFKGHGGEVVDRVVLCSDKNNNMCIKFLIRHTRRPELGDKFSSRHGQKGVCGTIVQQEDFPFSEKGICPDLIMNPHGFPSRMTVGKMIELLGGKAGVSCGRFHYGSAFGERSGHADKVETISETLVKHGFNYSGKDFIYSGITGCPLQAYIFMGPIYYQKLKHMVLDKMHARGSGPRVMLTRQPTEGRARNGGLRVGEMERDCLIAYGASMLIFERLMISSDPFEVQVCRACGLLGYYNHKLKSGICSSCKNGDKISTMKLPYACKLLIQELQSMNIVPRLKLADA*
>comp32306_c0_seq1
QSYGQGSFVCLFPPSTLSVCVSLSLSLRKYLISGTNNKVIHDFITRFFSVYIPSFSSRIISL*
>comp59152_c0_seq52
MSNLCSFFRDSLKGRNGVKSKDLESGSSSADKVKAGTAVFLIELEKRRAIKVFGKSTFIGLAITFFAGVCFSLFSPAFNLATNDQWHTLKKGVPHLTVYTAFFYFSVSCFVIAIILNITFLYHPVLNLPKSSLKAYLGDWDGRGWALLAGLLCGFGNGLQFMGGQAAGYAAADAVQALPLVSTFWGIVLFGEYRKSSRRTYILLGSMLFMFIVAVAVLMASSGHRKH*
>comp54305_c0_seq4
MSNGSLHEHLHHWNSYKKFDPFPWKRRLQICIGVARGLHYLQTGAKYAIIHRDIKTQNILLDKNWEPKIAGFLLSKRGPLSISRSLIRVESRVMGTSGYADPEYMATGVLTEKSDVFLFGAVLLEVVSAKSLIDILKENVDIYNYSLKSNAEKIVDPFLKSKIAPDCWQTFIGITERCLLADGTERPSMGEVEVELEHALQLQEEADAKIDCNNSG*
>comp395891_c0_seq1
MSLHRFKSKSFHEPNQCGGCHIFVNYIKWKEILNWSHGSTYITIFTNIIINLIRIKRQILFHFLRKFKSQ
>comp177186_c0_seq1
MWLPPCKYHFKHLLLACQDKKSILKLHALMVLTGTFTHGNINAQLIASYARAGDTACARQVFDKLPQRGIDVWNAMIVAYSRKGCPDEVLSLYHRMVLEGVRADSSTFTLALKACTRMLNFEMGEEIWGKAVDFGYAHDDFVGSSVLNFYAKCGKMDEAMKVFGKMPRKDVVCWTTMISGYARCGRAVEALDVYRKMQKEGMDGDEVVMLGLVQASANLVDSRLGLSVHGYLIRREIPMNVVIQTSLVDMYAKTGNLELAFRVFNMMPYKNVISWGALISGLAQNGLAENALGLLVEMQSHGYEPDLVCLVSALLACSQVGFLKLGKSIHGYIVKRLEFESVSGTAVIDMYSKCGALSCASALFDRIRFRDAISWNAMISTYGIHGNGKE
>comp34428_c0_seq1
MRTFVNQTHTLRNTLNPIRQYSKHFTLIPFLQLYCISNPYKSQAAFLFVPPLSNYYFYIQNSNPHSKQNQILVISI*
>comp230943_c0_seq1
M*S*SIII*LIYNLSLGILVTTYSLICVIKPVYIYWFYLLPNIKWVLPSFVIYVFL*GKYWISIELYACYYYILFDENNSLFNTVTVISN
>comp43563_c0_seq1
GGVVLASQDGKIVCENTLDARLDVVFRKNLPEIRKQLFGQVVA*
>comp22213_c0_seq1
MNRVCMKGSVSQAVRVLGRFPFACPPHSPLVGRVVNLEGARLLFRRVFDNLA
>comp65363_c0_seq1
MRKSAADRFRHLFTRSLLLLQHHHPSSSLSASSPFSHCRFFSSTPSSMASSPSDSSFPVTTHNINPKV
>comp50147_c0_seq1
SDSSEQDLPKKSHVIFVFFLFPSLPIFISELASKIINDCTTTSSSKISSITT*
>comp59170_c0_seq15
MFSAGHSRSQRPSSTVSPLRSRKSPAAAAAKSAARPSTPSSSASSRTSPKLSAPPSAATTIPGPSTIDRHDVSKAKENVTVTVRFRPLSAREINKGDEVAWYADGDHVVRNEYNPSLAYGFDKVFGPATTTRHVYDVAAQHVVSGVMEGINGTVFAYGVTSSGKTHTMHGEQKSPGIIPLAVKDVFSIIQETPGREFLLRVSYLEIYNEVINDLLDPIGQNLRIREDAQGTYVEGIKEEVVLSPAHALSLIATGEEHRHVGSNNFNLVSSRSHTIFTLTIESSPRGENIGEEDVTLSHLHLIDLAGSESSKTETTGLRRKEGSYINKSLLTLGTVIAKLTDGKATHIPYRDSKLTRLLQSSLSGHGRISLICTVTPASSSSEETHNTLKFAQRSKHVEIKASQNKIMDEKSLIKKYQREISELKQELQQLKRGMIENPNVAASSQEDLVNLKLQLEAGQFKLKSRLEEEEQAKAALMGRIQRLTKLILVSTKNAMSSSIPERPSHRRRHSFGEDELAYLPDRKRDSLIDDDAGSNASVPSVEEKDDVTNLDELVKDYKRNKRRGMLGWLKLRKPDNLVGLSPNVDSEGSANGSPASASKLTPNRVMLYDMKDSRRNSVSGKDNASAINSFPGRTQAGDLFSATVGGGRQLPPTGTTVTDQMDLLREQVKMLAGEVALCTSSLKRLSEQAANKPEDIQLQEHMHKLKGEISQKKNQIRILEQRMIGSLGHAPSNSEMSQALSKLTTELNEKNFELEIKSADNRILQEQLQLKNSENAEMQETILSLRKQINLLLDKTSTNSQQFADGETDRSKEILGKTDEPLEVTNLNAIFSQVDSKHGSSDSIINSQILMQADEIENLRQEKVRLVEEKDELEIQSQKLAEEASYAKELAAAAAVELRNLAEEVTKLTYENAELTGDLVAAKEAYCKSNFCQISSSCDCKQNTNNGVQRDGQSRKLGNEVLIEVLQKDLNARFQREAAFEAALSVKDEIEADLRRTLDETKHHKQDLENELTSMRVLVAMMRKSGVNIEDKSTVYMPNDIQTRVKNGLTPSNGYSYRKQYKDDETLANMEDMNALEELKASYKRERRRCKELESHISRLKGEDIAGLDVMDLEELQNLHLEAITKICHAKYANQNS*
>comp41283_c0_seq1
MATSVPFSLSCTSLSRLLSKQKSHTASPTTSLLSPQLGQKFLCHPLRYNGVSPIGMNLKRINVGGSVKASMDNKNVEVFTKEHLAVSLAKYVADLSNKFIRERGIFTVVLSGGSVKNLRKLVEPPYLNSIEWSKWHVFWVDESVVPKTHVDSNYKLAYDGFISKVPIPPRNVNTIDDALSADGAADVYETTLRRLVASNVIASSSATGFPKFDLMLLDMGPDGHVASLFPGHPAVNETKKWVTFIKNAPKPPPERITFTFPVIN
>comp8660_c0_seq1
MMSLYMPHGLSRVKSHVLVLDACVASLLSIALWHWQFYRFSLVFFS
>comp56277_c1_seq1
MMKGEKSIFDRFAVIFSVAIVWIYAHLLTVGGAYKNSAPKTQITCRTDRAGIIGGAPWIRIPYPFQWGAPTFDAGEAFAMMAASFVALVESTGAFIAVSRYASATPLPPSVLSRGVGWQGVGILLSGIFGTGNGSSVSVENAGLLALTRVGSRRVVQISAGFMFFFSILGKFGAVFASIPAPIVAALYCLFFAYVGSAGLSFLQFCNLNSFRTKFILGFSIFMGFSIPQYFNEYTAFKGYGPAHTGARWFNDMINVPFSSEPFVAGILALFLDVTLHKKDNQTRKDRGMHWWDRFRSFKTDTRSEEFYSLPFNLNKFFPSV*
>comp2562_c0_seq1
MDKAQLQQQAVFMRRSLLDQGYLDEQFIQLEELQDDVNPNFVEEIVTLFYKDSARLVFNIEQALMSSPTNFAKLDDHMHQFKGSCSSIGAKKVKNECTRFSEYCAAENSQGCIRTFQQIKHEYTTLKKKLETFFQLAREAAQIK*
>comp56382_c2_seq9
MLFTPYSSISGCCCQSQICRKMELVDGKKGKTASGCLYNHVFDTVPSQLEVEDAVSALQNFMQAVSSSSTLQQISGSYDSRILLSQRYKRLYDALQWLQADPSIKRLVVSLSSDKAIWDAIMSNVLHQKLLELPDSVECRRPQISEQKEFSIHILSWILDIIKGKVSELIESFQSLLNDIFQSPRMENATVDTTELDEKVRSSLLLSIVILLIVIMARSQRI*
>comp277110_c0_seq1
MFIWPFEFGKHFYNDSIIVSTSKKVNFPSFISPFSVHLK*
>comp57430_c0_seq7
MSFSSCFCHSPLAFKTIKPCGTVGKGQKFRFPIRSNGAELCNQHIVRSRVNLSRDWSFIGGSRVVVKPKATRLVHNPRSSRVHASWFSGSQLASSVFTLGTIAVLPFYTLMVLAPKSELTKKSMESSMPYVALGILYAYLLYLSWTPETVGLIFASKYLLPELTSIGKMFSGEITLASAWIHLLVVDLFAARHVFQDGLENQIETRHSVSLCLFFCPIGILTHVITKSMTKTTRKKKHGL*
>comp39087_c0_seq1
MLSCC*IEAPIDIEY*RAKASTDKTSAVRRICASV*FHMATGKPKLDRDNGAIIPQNQYTIKLINPPPSVSLVLKILILLIN*
>comp55993_c1_seq3
MSRIASLKIRDGIKRTIVASIHQPSSEVFDLFHNLCLLSSGETVYFGPTSAATEFFASNGFPCPPLHNPSDHFLRIINKDFKLDDEDCFCIGVTKEEAVDILVKFHKSTEISNQVQTEVAAIGDSDSGFMKRKRIQASFLTQCHILIKRSSVHLFRDVSNYWLRLAIFVVAALSLGTIFFDIGSSNASIQARGSLVSFVASVLTFITLLGGFPPFVEQMKVFERERLNGHYGVSSFVISNTLSPIPYLLLMSLIPGVIAYYLSGLHTGLERFLYFSSVLFACVFWVESLMMVVASIFSNPNMGITVCGGVVGVMILTGGFFRLPRIVQE*
>comp47032_c0_seq3
MTRKRIQIKKIDNISSRQVTFSKRRKGLFKKAQELSTLCDADIALIVFSSTSKLFEYASSSMQQVIERRNRQSAIHRFDHPSIELQLESDSNDLLRKKVEDRTRELSQLNGEELQGLTMQELQKLEELLKRGLTSVSKVKDEKVIQEISTLKRKGVELIEENQKLKQAQSFIHGQRQSFESIICSSSYLPEDSSSSDTSLKLGLSLLK*
>comp31384_c0_seq1
MPPWNPLHFMLQCKLYFHPIQVFPLNFDLSFFYLVVRRQNLTACQCKK*
>comp384028_c0_seq1
MPTALAKSSFLLTLDLMNNRFSGEIPSWIGSFANLRVLLLKGNDLEGSIPIAICQLRHMSILDLSHNNLSGEIPS
>comp35532_c0_seq1
FSKHALNGLGFSIKYYKINLTAHIQFLCHVLCFNWIGCSSPRLYKNFS*
>comp203530_c0_seq1
MKRRIIG*H*TQIEFFCSFVLSPYPFPKIRPPNTLAEFFSFELFLLLLGCSVLLCWWAIVIVGTSMICCCNYFYQFFIMCVDSTFNSWKVESGKCLLDLNENELFNCINLHKL*
>comp39929_c0_seq1
MRSYDDVNLRNYSYYFNFEEQFIHQETRAWMTENWTISFYFCGLYMILIFGGQYYMQSRPRFSLKGTLCIWNSLLASFSIMGAIRTAPELFHVLKNYGIYHSVCIPSFIEQDRVAGVWTWLFVLSKLPELGDTIFIVLRKQPLIFLHWYHHITVLLYSWFSYTEYTASARWYVVMNFCVHSIMYSYYALKSMGYNPYRKIAMLITFCQITQMIVGCSVNIFAAQYIQANQPCHISTTNIKLSIAMYFSYFILFARFFYKAYMSPSSSRKSKIDNTIPGGYASGNKNKLNDKIKSQ*
>comp46711_c0_seq3
MIIPVRCFTCGKVIGNKWDPYLDLLQADYSEGDALDALGLVRYCCRRMLMTHVDLIEKLLNYNTLDKSDPS*
>comp252644_c0_seq1
MNEQQVPFSSHHLTLLHSTILSVHSLGVFRVWILRVHKGFNLDLVFGGSKVSS
>comp45626_c0_seq1
MQKPWVCQFQSCRHACLYPSRAFNCKNDQFLCVELASGGMEYPRSSG*
>comp31545_c0_seq1
MYSCY*LQSIRRLHFCFSLFFPSHLKHT*YICSINRPYRRY*TKQIYIVEQY*HYKQQEYMYFF*
>comp51174_c0_seq1
MDHPRFVIEASEAASMAEASGMTLSQFLPSLVSSAQSLARPPISNFAVAAVGVGPSGRIFVGVNLEFPGLPLHHSVHAEQFLVTNLSINAETHLDYFLVSAAPCGHCRQFLQEIRGAPDIKLLIISDEDQEFTPLSQFLSHRFGPDDLLPKGVPLLLEPHHNGLSLLSETHDLPNGLGLCNRNGYAPPPNGKLKFAALEAANNSHAPYSESPSGVALMDCHGKIYKGSYMESAAYNPSLGPVQAALVAYVAGGGDGYDKIVAAVLVEKDGAVIKQELTARLLLHSISPDCQFKALLCSSGA*
>comp56045_c0_seq13
MAVVLRCSCFLSRPQLSGNVPGKLACLSFKVDKYVPLFKYTFDGSSEIRSMLPCSKCKEDINQKLPSLIFLASNILMFSTPCKALAETCEADNSFFNMPLLLSVALIGATVGGLLARQRKAELQRVNDQLLQINAALRKQAKIESYAPSLSYAPIGGRILDNEVIVDPKKQELISKLKIGKNFLRNQQPDKAFAEFKIALELAQNLNDPTEEKKAARGLGASLQRQSKYRDAIKYHSMVLAISEREGEDSGNTEAFGAIADCYTELGDLERAGQFYDKYIAMLEND*
>comp493_c0_seq1
MEIFLEGTVCKLNDDVKIELVIYGVSYVNYVKRNWIC*
>comp156632_c0_seq1
MGRMHAPGKGISQSALPYRRTVPTWLKLTSDDVKDQIQKLAKKGLTPSQIGVILRDSHGVAQVRFVTGSKILRIMKAMGTAPDLREDLYYLIKKAVAIRKHLERNRKDKDSKFRLILVESRIHRLARYYKKKGVLPPNWKYESCTASA
>comp36813_c0_seq1
MEEDKKADGVDELEEDKKVGDGEEVKDDKKVDGGKEVKEGKKVDGVEEVKKDKKDDDMKEIEEDKKDDVVNETEENKKDDNGSENEKMDEETEVKETAESKEEKEKV
>comp544_c1_seq1
MFQLGDKKVRFVGLVKMGLEVAHRLEAFGCTICTILYHSRNKMPLVSHPFYSSVVELAANSNVLVLCCALNDQTRHIINRELKSRWQWETVELLPMLEEGL*
>comp15039_c0_seq1
MNFKFSCISDVSYAMLLVNQAHQYGNYFSSIPASAYLSYLYKCSSLMAKK*
>comp540449_c0_seq1
DLKTTFGCSFSRNPRKQAFFRLNIIAYCCNDCFLIKKCFFLPYQ*
>comp501171_c0_seq1
MAAVQGLLKKHDAFETDFAAHRDRCADISSAGSELVNAGNHHADSITQRCQQLDKKLENLAALAENRHANLMDNSAYLQFMWKADVVESWIADKETHVRSEEFGRDLSTVQTLLTK
>comp232258_c0_seq1
MTHWDISEVCFETICCLCPISHRFFIWFTESSTSIDG*
>comp57296_c2_seq1
YSCCCVWWTDSQSSFFALINDCHVLVITLPCTRGLPKQNLSTSLIDILFCSICNLSFFIHISL*
>comp45541_c1_seq1
MLKNTHIAPKENEGRKVIVKPSNQISRDTSAQGRMGSISPKQREHMHGTS*
>comp250125_c0_seq1
MQRSLMNINSQRLSRLTLRERPTLSSSIDETEVCKSTGLLAYEYFEVQQPHFRPPFHDKVSALASEFPD
>comp51027_c1_seq2
MLRRIASIYPFRLLQDMGTISYSTSTPSFVFLLHNPIHSPCSSSSFPLYYCTIVSATDTDESERNINRTQFMNSFRNQCRYGQLKSVDEALDLFHHMARMKPLPSVVDFTLLLGVIVRMKHYTIAIYLVKQMYSSLGIKADTFTLNIVINCLCRLKFTAFGFSVLGTMFKLGLDPSVVTLTTLINGLCVQGNVAQAVWLADHMEKMGYQSDDRTYGVLINGLCKMGNTSAAIGWLQKMEERRWKPNVVVYSTIMDSLCKDGLVSDALNLCLEMSSKGIQPNLVTYTCLIQGLCNFGRWKEASSLLDEMMKTGIMPDLQILNILVDAFCKEGKIMQAKSVIGFMIQMGEGPDVFTYNSLIDRYCLQNQMNEAMRVFNFMVSRGCLPDIVAYTSLIHGWCKIKNISKAMHLLDEMVNKGFIPDVVTWTTLIGGFCQVGRPLAAKELFLNMHKYGQIPNLQTCATILDGLCKCQLLSEAISLFEAIEKTNLDLNIVIYSILLHGMCSAGKLNAAWELFSCLPAKGLQINVYTYTIMIKGLCKQGLLDEAEDLLMNMEENGCPPNSCTYNVFVQGLLLKKETARSIKYLKVMRSKGFSVDAATTEMIINYFSTDEGDNAFREFLFPKK*
>comp19114_c0_seq1
PSVGKTGWFNFWVTAQFFLGNSSVCYAKGVGCSFELIFLFWFSFRRIHDPPYS*
>comp295913_c0_seq1
MHATQRLKEEGYVRLRYWRRKDVCDTEPGCVQIRPATCVQTKEDANRGGLCRNRGWMHHKGACEPRDGAKQRWAL
>comp46621_c0_seq1
MTKAFGFRSTPWVTPIQDSEILAGMHFAVILILLYLIIIKRSFKKILFEFRCGNYVDIISVINIIHKDVCVCV*
>comp40640_c0_seq2
MGSKTDHTQTASKSGPFESCWLTSRSIVYLAFIKPVSSKDHTQNFSRVMNRDKDEWLQNFHNSKNLLKN*
>comp3651_c0_seq1
MSSPLHHLIFHSSLLRSHIHNSTCKCLFILEQTHYAKAIFKKVAFQSDSTI*
>comp48556_c0_seq1
MTMTPQSDKDPPPPSRAFLDTVQEIARIYRSLPPRPSIEEVEAATSTVDTVNSEEQTKLDEISMQEPPHDVPEDLFYVLQELKKTMVLFQSHEQRSEALHLLQLEKMFQTFGDLIQRASELVSGDTQKQKAPTLAEPVEKIARDFVITDESLVKKREEEEPQKNNFDAEKESSAKALLSAGDGNSEKLSLMKVATLIENCANSGAATIELRGKLVDQMEWLPLSIGKLSDVTELDLSENRIMALPTTIGGLKALTKLDLHSNQLINLPQSFGELINLIDLDLHANRLRSLPASFGNLTNLTDLDLSSNEFTHLPETIGNLSSLKRLNVETNELEELPYTIGNCSSLSVLKLDFNQLKALPEAIGKLGWLEILTLHYNRIKRLPSTMGNLCNLKELDVSFNELEFVPENLCLAVSLKKLNVGKNFADLRALPRSIGNLEMLEELDISDDQIRALPESFRFLSKLRVFQADETPLEAPPRDVVKLGAQEVVKYMADFVTERDATLLSSKKKKKGFWFWFCSIFCPQQR*
>comp18287_c0_seq1
MTKAIIGNYKVFTMYMAIQNRCRFAERLIEQNYQQQQQSSHPTR*
>comp55647_c1_seq1
MNDDTGEEKGLLWKLPELKSNRLGKVGPAFGVGAGCGLGFGVGLLGGVGLGPGIPGFQVGFGFGA
>comp28666_c0_seq1
PFNFIFRNKTSHSFPYPKPLAKAFTPGFSQSLA*
>comp374705_c0_seq1
MFAIWRTRTYTRYLPNIWVFYLPINNGISLIFYTIFQRCFIGSMKTKDRGLS*
>comp43026_c0_seq1
MTISLLMCRLTQPLTNVPCSGQKMNVRQKQKEKVVLVMGATGTGKSRLSIDLATCFPAEIINSDKMQVYEELDIVTNKISKEEQRGVPHHLLGTQNPNTEFTATDFCDMASASIDSITGSEQLPIIVGGSNSYIEALIDDDDYKFRSRYDFCCLWVDVSMPVLHSYVAERVDQMFDNGMVNELRPFFNPNGDYSRGIRKAIGVPEFDRYFRSEAFADEETKRKLLEEAISEMKANTCKLARKQLGRIHRLRNVKRWEIHRLDATPVFRKHGQEANEVWKKLVAQPSAMIVAHFLYNATTANVVSGLGVPASESVIAAATC*
>comp352253_c0_seq1
MKETSEELLTSCEEFLSIGDKLTYTKDEDKKTVEQSAILSFASLIFATCKGGKCQADTLDRYAKLYLDKFTGSSKHYDKMIYLQGLSNIELDKVLDFLEPVIEGRTSSDRHIRFLAVWATLPTVYTQQSKVYDIY
>comp38815_c0_seq1
MASVRVIQLFLMATFNPSNVTHTRSYESICWSLINRIFKPCLQLSTLELPETYLGSRPLNNIANLTLLSVYLWSTL*
>comp307079_c0_seq1
MSKDFLVDSRPDYHQTEVHEMSRSKIIRFLVRNGWMFVGFWKRGWYKIRMNLNF*
>comp147193_c0_seq1
M*ASI*TLHIPYLFLFWFLYIRQYIYIFFVIVSFFICPIIALIL**SLACK*LFNSFCCWIGEVLFKDFSGFLFPSTKSPVL*KKNGFFL**DYYIFP**S*TVFVFLKSRTSNQYSFLSYQMERLIYKEIVVDFCLSCSTMLIATF*
>comp56913_c1_seq1
MGIELGMRTKPYEVQTFSFTIPFYVKFHLFKRSTTIFSNIFKIEIQSLNAGDQGKCFLIIIVSY*
>comp42766_c0_seq1
MLCLLLLIIVIFSSVCFCLNCAKHVTDSSRTAFSISLPLSLFHCLLHTKYCWNR*
>comp31014_c0_seq1
MGVVIQILCSYVTLPLYALVTQMGSTMKPTIFNDRVAAALKNWHHSAKKHVKHGKHSEANSTTPFSSRPTTPTHGMSPVHLLHRLPGHSDSLQTSPRTSNYENEQWDVEGSTSPSNHTGRDETQMQVLEPRSTELPISSQHEISINLSEFSFGKRHTG*
>comp53657_c0_seq1
MKTVLAFACLVALGLAMPMSDDAEWESYKAKYGKTYESNEHESLRRVIYFTAKEKVQEHNARFEQGLVSYKLGLNRFADMLNGEFRKMMNGYRRGTPRNSFSVHVESNETLPATVDWRTKGAVTPIKNQGQCGSCWAFSTTGSLEGQHALKKGKLVSLSEQQLVDCSGAEGNEGCDGGLMDDGFAYIKANKGIDTEASYPYTGEDGTCAAKKSDIAATVTGFVDVKSGSESSLQDASATVGPISVAIDASSWDFQLYESGVYDESDCSTTELDHGVLVVGYGTDSGTAYWLVKNSWGTDWGINGYIQMSRNKNNQCGIATEASYPLV*
>comp34616_c0_seq1
MCSLFMNFLYLHEHLLNNLLKSIYVLTSFYFSTIQQTCSICL
>comp60146_c0_seq7
MVIINLGKKKEREKEVQRMQLGKYELGRTLGEGNFGKVKFARNTDSGQPFAVKILEKNKIIDLNITDQIKREIATLKLLKHPNVVRLFEVLASKTKIYMVLEYVTGGELFDKIAYKGKLTEAEGRKLFQQLIDGVSYCHNKGVFHRDLKLENILVDAKGNIKITDFGLSALPQHFRADGLLHTTCGSPNYVAPEILANRGYDGATSDTWSCGVILYVILTGYLPFDDRNLAVLYQKIFKGDVQIPKWLSPGAQNMIKRILDPNPETRITMTGIKEDPWFKQGYIPANPEDEEEDVYIDDEAFSIHEVPHEAEQRSPGSPTLINAFQLIGMSSCLDLSGFFEKEDVSERKIRFTSNLSAKDLIQRIEGTVTEMGFRVQKKNGKLKVIQENNAHKSLGSLSVAAEVFEISPSLYVVELRKSYGDASVYRQLCKLSNDLGVPPGQALVSSEVI*
>comp134468_c0_seq1
MLGLTEVVAFSSCTKTEKLFLLEFLMQFGVSILNGFNCWGFFTHDLGFVIEQRGLDNVCGGFYYWNINVKLFCISYIFNIA*
>comp44873_c0_seq1
SHYNIKNFTLNKLTLLTNCDTTSISELLNNTAKQKAVESTIWEEYFDENTIPSD*
>comp1756_c0_seq2
MSIHRNNVYPYKSSKLRALKRLKNQINETSSVENSKEKFVVSEHSKKNKVLNCLLRENPKRAKTTLNVIEGPKKCQSQLLLQQPNQPTCSHLQTLF*
>comp179213_c0_seq1
MASRNPMQNDRILATSLFFFLLLKTLTNCDSVNYIKKE*
>comp353741_c0_seq1
MRRLLLSEGVVTSRETMPLSTDSISSSVPWLKQAPQTLTI*
>comp394639_c0_seq1
MSFNEKAYFTLPWLTLIP*
>comp20639_c0_seq1
MTTHLINRLPSRVLGFKSPMDVLASFTRISPLPIISNLRSLSVYHLFISMVKTRGNLILEP*
>comp294624_c0_seq1
MLCMFDVNVNIDESPLCKFVTSFLPLPLLLFYLFFPFFLPPLIDNVICVRSFVLWVYF*
>comp38792_c0_seq1
MYIYSSITHKMPSCFLSSLMIGLVSALGGWRLNKVRC*
>comp59496_c1_seq1
MGKLSYLVREEIEKKKKIGGFHNFFISFLK*
>comp54214_c0_seq1
MEFQQSVKFMVHRNTQKKWVFHKGNTEPETFAEPITPRRKWKIFYKSSSTTIPSKHPKPETQNPPEEFLCPISGSLMADPVIVSSGHSFERVSVQACKNSNFTPQLSDGSTPDFSTLIPNLALKSAIVKWCQTSSTVPPEPPDLNSAENLVRTRMATQKPESETQKFKVVVTEKELIQGMKENPPVNFNHAATEVPWRPTHFYSSSEESVGTPLQLSTRPSCYSSPSSSEIEAITPSSPEEEEIMAKLKSPQVFVIEEALISLRKLTRTREETRTQLCSPRLLSALRSLIISKYTNVQVNAVASVVNLSLEKMNKVKIVRSGIVPPLIDVLKGGSPEAQEHASGALFSLAIDDDNKTAIGVLGALSPLLHMLRSESERTRHDSALALYHLSLVQSNRAKMVKLGSVPLLLNMVRSGHMTGRVLLILCNLGSGSDGRAAMLDSGAVECLVELLNRGELSSGSTRESCVAVIYALSHGGLRFKAVAKVAGVVEAVRKVEKVGSERVKEKVKRILEMMRGKEAEEEEDVDWEELLDSGLGSRTRGGRHSTGLDESTANSSEF*
>comp42288_c0_seq2
MADRSTTPSSVKPMERKKKRKALDKKRRRASAETEASKPVQTSGEVKASSEASPCGGGALPEFHIGVFKDLAAADESTREAAAKKLVMELQQVQDAYDGVAKKVMVGGVFKLEGEKDDGLDNCAPSVRYAVRRLILGVSSSRECARQGYALGLTVLAGSITNIRVESFYKLVVDLLEVSS
>comp43923_c2_seq4
MPIIAHIAAYPSSVSCAVPLVMSHKRRPEDGKPKSESASPEDKRRKAPAFSNVVLELMRLQSVKHLLEPILEPLVRRVVKEEVELALRKHLTSMKQTCGKEIHTSESRSLQLQFENSISLPVFTGARIEGEDGSNLRIGLVDALTGKVVSSGPESLAKVEIVVLEGDFEDESDIWMPEEFRSNIVREREGKKPLLTGDVILCLKDGIGMVGEISFTDNSSWTRSRRFRLGAKVVDKFDGIRIREAKTESFIVRDHRGELYKKHHPPSLFDEVWRLEKIGKDGAFHKRLSREKILTVRDFLTLLNLDPAKLRSILGTGMSAKMWEVTVEHARTCALDMTRYLYFPSHSQQKTGVVFNAVGQVTGLLSECQLMLKTR*
>comp57376_c4_seq1
MQPELNANNDVEIVHVRSPRRNETTVGQDSTGFAFDVKVQSEQKFLDWATPLNALRRHDAISALLYTTAEKSINNNNVTITYNPEKSSAKSAQITASYDSEDETNNSSGESGNHQSHNKHRGSQERGSSSGNAAAEAAAASYSPDSAQRKEQFLRKAGAGIQDSYAQMVDMSIQFNGEHKAQYVATAAYASSGVSEKNRFLFYIGMSPARNGKDYQIALDVEAKMPNVPLVNYRKALEADASSHISAQLNFGERGSSGAQVSLQGKLVQTSERRDYVRHHPVSALCEQQMQQGNYIQQACRNATAAANMLDQYRFTINYEKVPENVKNATYKAYALARYFGNLYVSENIVNPNNKQGQVEIQVNLGKDLQSVNVSMAAPAITASFENVPLNPYVAAAVAAHPEYNAADRVGQYLLLSQQFPTCSIDKNQATSFDNKSYPINLGGSWHVMAYWEPKSHFDSNSASSASSSEQQAFTILVRQTGSDKKEIMAVLGNDIVEILPQSEGQKAGIVKFNGKKATFDTQSSDTFQDEDGNTVIQVFALPDGTVRVLGQKHGMEIMFDGQRVKLQVSNSYRGQMRGLCGVFDGEPVNDFTSPKNCILRNPYEFAASYAIPDSSLTSPAKELRQKAENADCYRQTVMLGDVISENEAGRSTKRSSSKSSNSIGNRNSKMSSPARLRVLVIHANGQTCFSTRPQLSCQSQSQEANTAQKNVDFHCVSDATAAKRWEDQIKRGASPDFSKKGANYKHSMKLPSRCNA*
>comp222181_c0_seq1
MIGWITSLQYLPYIFDKINSQCKKLKIYDNLKPRKMGIYLLNRK*
>comp276488_c0_seq1
MNERKRGIKKKKIKKKYYKGRQDKILAEASLPHFAEENIEEEGLLFSACY*
>comp52256_c0_seq1
MLHSTRLLPLPCLSSSLQTTFTYYHFRFSPPPSFIFSFRPHKRFHFLTPCSSLRQTKKQQQIRKINTPDTAPTGIKRPFTPSPRNDDDNNEEGESRLEDGTGVAFKGTLLAGVLLVGIVGGFASVGYIYKDQINSFLNQFSLLIEGYGPAGYALFVAVYAGLEILAIPAIPLTMSAGLLFGSVIGTIIVSISGTVAASVAFLIARYFARERILKIVEGNKKFLAIDKAIGENGFRVVTLLRLSPLLPFSLGNYLYGLTSVKFIPYVLGSWLGMLPGTWAYVSAGAFGRAIIQEESDPISFGGNSQLLTLGLGLLATVLAAAYVTRLAKDAVKDIE*
>comp251949_c0_seq1
MNLTEKENKIGIRYILETCFFVLFSFSYYYGCSEFTPIISVF*
>comp235512_c0_seq1
FPTLYWVPKNSKSNPVKYEGGRELEDFIKYVAKQATNELDGYDRKGKAKKEEL*
>comp144044_c0_seq1
MRKITFLIDSK*DRFSLKNKNNVHHNNSTQISSFSFEYFLF*TSLAYQLNRELGITRGG*F*ISLILINLVHMDMASSKQLNRQFRIS*
>comp52046_c1_seq3
MMWRLNFLVLFCCIVLNNSYMLYYICPMHTLFTLMVYGALGILNKYNEIGSVIAVKIFACFLVVIFVWEIPGVFEWLWTPFTFMLGYTDPDPSKSQFSRLHEWHFRSGLDRYIWIIGMIYAYYHPTVERWMEKLEEAEIKRRISIKAVVVLTSSLMGYLWFEYIYKLDKLTYNKYHPYTSWIPITVYICLRNVTQSFRSYTLTLFAWLGKVTLETYISQIHIWLRSGVPDGQPKLLLSLIPDYPMLNFMLTTSIYVAISYRLFDLTNTLKVAFVPSKDDKRLTYNLITATTISVVLYSLSFVFLRIPQMLV*
>comp50539_c0_seq1
MGRAPCCDKANVKRGPWSPEEDATLKTYVETHGTGGNWIALPRKAGLRRCGKSCRLRWLNYLRPDIKHGGFTEEEDNIICTLYGQMGSRWSAIASQLPGRTDNDVKNYWNTKLKKKLMAGKVSLKTLTDNDTLPSTQLLLTQHTETQNSDFPASQNQNSPPSALPILSNDASFGFNINEKSMSFDLIHQLYSPRVMDVVSEIGASSRNNPMVSLSQEGSSISDSSPIAVDNNCVSLPEHAGDEAMEVLMDFGFGFSYDLVNGLNCHERFGEFAPSSYPEWVDFSYADIKPH*
>comp49152_c1_seq2
MVSSASFTDEIATVLQHHYQGSGKPLLFLLHGLNTDSNNFSTPAEFQGMDMFDKDLTTLHPILTECRVIKSELEIALIQYANDISSEAHVEVMRKTKVGMKEYQLESMFLHHTYMYGGCRHCSYTCICATGDNSAVLHYGHAAAPNDRTLEDGGMALLDMGAEYHFYGSDITCSFPINGKFTSDQSLIYNAVLDAHNAVISAMKPGVSWVDMHILAEKVILESLNRGHLIVGEVDDMMAARLGAVFMPHGLGHFLGIDTHDPGGYLKGLERRKEPGLKSLRTIRELQEGMVITVEPGCYFIDALLLPAMSSPETSKFFNQEVIDRFNGFGGVRIESDVHVTAAGCNNMTKCPREIWEIEAVMAGAPWPVKKTSTNVGNGLENKSDFKRP*
>comp40733_c1_seq1
MDIACSFHRQQNMQQKFPIYVNVRVQFCLVCSRLITDSLGQFVILLT*
>comp49839_c0_seq3
MGEPNSGYCSSSGEEDGGAEWRAAIDSIAETSSYISSFMNGFSATSNEKSATKHGDPNAHDDREQKPTTQQIKHYQLKAQKLLSDILENTIEIVKEPVHVLDEDPNINDGGVRLFKHAQPGIVFDIVDEPQPPRKRPRLLPGGDFDEKSKKFKRRIQSVAVDGKDLIAAANDTYKKSLARLEAKNAAAKDAAKREEERVENLKKIRGERWLPSMAKEMQTKYQH*
>comp3883_c0_seq1
MSFVGLLKMVDVITFYVLGGCQVKIVPLT*
>comp290904_c0_seq1
MPMELITTDGTITGIISMTMLIRMQAQGLFISEETNLKLQTPFTIHSNARSWFVSTHRN
>comp438939_c0_seq1
MSPRSMSHNFCSGLLKWCFRVSILFPKLQILLSYFFV*
>comp166470_c0_seq1
MGFKITVQRVKNGDGLLNHIGYLGLRFFIFYFILFTPLITF*
>comp155881_c0_seq1
MDGIVGQFGENMPDASILVFNFCEEETKSKMANIFSEYDITLMDYPRHYWGCPVLKMEVIRHFLRSAESWLSLGHHNVLLMHCEFGGWPVVAFMLAALLI
>comp44344_c0_seq1
MFDVTARLTYKNVPTWHRDLCRVCDNIPIVLCGNKVDVKNRQVKAKQVTFHRKKNLQYFEISAKSNYNFEKPFLYLARKLAGDPGLHFVEMPALAPPDVILDTATQQLNEQELVMAAAQPLPDDDDDTFE*
>comp31322_c0_seq1
MNIYWNLKVDKNVQIPPFSYEILVSEGKPLNESDARIVPAQAPPYLFSDVKAGTVYYFAVRLVTDQGYKSAISEIATGEVPLGAWARVMTPTRVMGIFVPICLVLIIVAGAFVIFIVRHRRLQNNFVTFANSHYSTRSGAATFTTDGLDDEDSPVIRGFSDDEPLV
>comp238717_c0_seq1
MLDTNTIFETQSRSFRRMELGKVVGPDGIPCLGSGIDKKGDIQCCSSYCDEAQGKSCCVEH*
>comp269950_c0_seq1
MYSNLCIEFAFLFLICSFWEATSFLLPCFCC*
>comp495644_c0_seq1
MEVVIFKPLNLPCLCCLPFSNSSSLFIYVALGFYLLILN*
>comp41969_c0_seq1
MDPKGSLCANTWAMPSSLTSPENGLQANLSSDPPSFYGVRIEAPFKEFNQPSRTQSLIPCESNKDIKIPDQENCPMSDSSQTSKLQDWDPSVML
>comp56540_c0_seq2
MGFQENGNGEMGLSGIPLGANNKYKRMNSELPEDYDDVLHQQQQEDKRNSTRKYVLACAIFASLNNVLLGYDVGVMSGAVIFIKEDLKISEVQVEILIGILSVVSLLGSLGGGRTSDIVGRKWTMALAAVVFQTGALIMTVAPSYAVLMIGRFLAGIGIGFGVMISPIYIAEISPNLTRGSLTTFPEIFINVGILLGYVSNYAFSGLPIHISWRIMLAVGILPSIFIGFALFIIPESPRWLVMQNRVEEARSVLLKTNEDEKEVEERLAEIQQAAGFANSEKYEEKPVWRELLSPPPALRRMLITGLGIQCFQQISGIDATVYYSPEIFQAAGIEDNSKLLAATVAVGITKTIFILVAIILVDKLGRKPLLFISTIGMTVCLFSIGATLSLFGQGSYVIALAILFVCGNVAFFSVGLGPVCWVLTSEIFPLRVRAQASALGAVGNRVCSGLVAMSFLSVSRAITVAGTFFLFSAISALAVIFVYTIVPETKGKSLEQIEMMFQNEHERQGSEMELGDVEQLVQNKSGLTN*
>comp41968_c0_seq1
MRVRLVVDILIFASAAVLAAGRNVADQLDGLYGGDIIVQNASLRDIGEQSLLGTNTFDPIEQIATGHSELNGSSLTSKSHNLPVPLGAEATDVLPIGHNEVIQNVVKSEVALPAQDVDRLSSTETFGIRMGKKGGGKKGCMGKKGGWGKKGKKKGKKCKKGKKKGKKKGKKKDKKKEHKKEDKKEDKKEDKKEDKKEGKGSKLHDLLEKIKGKK*
>comp41913_c0_seq2
MLTLKLFVYTVVIFFVSLFIFGFLSNDPGRNPGREE*
>comp60054_c0_seq23
MSAGYDGKTIVWDIWEGMPIRIYEISRFKLVDGKFSPDGTSIILSDDVGQLYILSTGQGESQKDAKYDQFFLGDYRPLIQDAHGNVLDQETQNVPYRRNLQDLLCDSAMIPYPEPYQSEFQQRRLGALGLEWRPSSLKLAVGPDFSLDPDYQMLPLADLDVLTEPLPEFIDAMDWEPEIEMRSDDTDSEYNVTEDFSSRGEQGCSSSNASGDPGCSTDDSEGEDTHMDSIRRSKRKKQKTETEIMTSSGRRVKRRNLDECDGNTFRSSRSRKGKSGRKTSRRKSSKSKSSRPQRAAARNALHLFSKITGAPTDGEEDSLVGDSSDSESTLQESNIDSDESGGALQNDQLNHSKGKEVLLYESDDIKSHELTETRMNATNRRLVLKLPVRDSSKPVHKFDNQAELVGSSSKTAQESSDVNRNRSSSKDPGFYSGSGSYHTIERTRQVKLGHIADHVDLLGKIRWGVVRARSSKPLRVEEAMPSDANPRSVKCFNDLSEKENVGTGHEKEDKDFSTSFSPLEIQNNEDKVDSLTEINENCAGATSEPLNPSENGEELATSSSFRDKDESLISVHMIPQDAIAASISHSGADQLPEPNIGFPSVSTKLRSKRSTRDPESPSKHETKYSVLKNSACSTNANNLNKEQYMVVADDDNNTRVISNQGENGSQEIDAQVDQNVTSHDSLDPHSHRDKMYKAVYRRSRSHRAVTNLGDGSGLGESTSNGSNSNFNAVVDFSNGTNDAVHTNGSVELEPTTCDPNRERNNLKVQQGREYFTVRSPQNVSTNRGQLTEEEWGSSSKLTVGLRSARSRRSSYNVCENSPINRRKSVQSATKASWLLLSTHEEGCRYIPQQGDEVVYLRQGHQEYIDYSGERESGPWISLKGQIRAVEYCRVQSLEYSTVPGSGDSCCKMTLLFVDPNSSVVGKSFKLTLPEVTSFPDFLVERTRFDAAMQRNWTHRDKCRVWWKNEGDSDGSWWDGRILCAKAKSSEFPDSPWERYTVRYKSDLTETQLHSPWELFDADTQWEQPHIDDKSRNKLLSALTKLEQSGNTIQDRYGVHELKKISNKSKFINRFPVPLSLELIQSRLENNYYRTLEALKHDMKVLLSNANSFFEKDAELSAKIRRLSEWFTRILSSL*
>comp33183_c0_seq1
MKILVPFCIVMLCYTSRICSQAKVLLGS*
>comp52622_c0_seq1
MVDHHLSLPPKNASQNSQQTQSSNLEPLPSSTMVVIRDNNDSSSVFPPSNHENLQIFSHTHQHHHIPESPSSSSSSSSSSSSSVSSFSLSDTDAWGLSSSSTFDSQVQKGGEFIGWMSIGLQILRSKLFAMVSSFRNYAANRGAIWSIGPVVMSCWITVRVWCWLMQRKRRRMLTRNDNHLMNIIQEKDGRIAQLLHQIAQMNEILIARHKALAAKLVE*
>comp50499_c0_seq1
MATLMLKGAETKLVSAIAPYELGSVGLNSHKRCFFKKGVLSYGNKYRTTNLTPRCSISASRPASQPRFIQHKKEAFWFYRFLSIVYDHVINPGHWTEDMRDEALEPADLYDRNMRVVDVGGGTGFTTLGIVKHVDAKNVTILDQSPHQLAKAKQKEPLKECKIIEGDAEDLPFPTDYADRYVSAGSIEYWPDPQRGIKEAYRVLKIGGKACLIGPVYPTFWLSRFFADVWMLFPKEEEYIEWFKKAGFKDIKLKRIGPKWYRGVRRHGLIMGCSVTGVKPLSGDSPLELGPKVEDVEKPVNPFVFLSRFILGAIAATYFILVPIYMWIKDQIVPKGMSI*
>comp34398_c0_seq1
MKHKYSIFHKFGSMLTFPFEGSRLKF*
>comp179217_c0_seq1
MDHDAECSCNRKLGTVYLVRNVSVNHFLSCSKENPLPSSPLH*
>comp15758_c0_seq1
MSHVPPAMRITDFLKFAYQWFWDLIRGSIRALSIIATDVLSASLPPSIWMKERPQFW*
>comp8309_c0_seq1
MEQNKINASNSMTKKIQNLFRILHYVKDHIQNIKHKSFLATETPYDQIFT*
>comp163762_c0_seq1
MKHNYGKAFQINKTQTFDQKLNTKNSSPANFWSYEGIVVCVISMLYTKIRKFHVLISIKLAQ*
>comp59208_c2_seq5
MLPSLASHSAMIPLVVQTILPMLNKDAKVSLYATATRLLCRTWEINDRAFGSLQGVLLPKGFTDFMSERAICISMAASIRDVCHKNPDRGIDLILSVSSCIESQDPVIKALGLQSLAHLCEADVIDFYTAWDVIAKHVQGYCADPILAHSICLVLRWGGMDAEAYPEASKDVVQLIWGVVTSGHAGQELQWAKARISALEALTQYEVSQLEQSIPDFKKRNLELFFSETNPNVLKVMEDFHVKIITYEHINRRRLVKEKRVTGSKIEKLMDVFPQVIFSSGKISEARELPGAALLCFSFTPKDVNEHQASKRLRDVHAGYENALVEIAASLQLSRNILLALMALQSWKGFMRRWMKAYIQSYDAKAQLSVLDKTSKAASDILKSMIAIADEAIPRAAENIALAIGALCVVLPPSAHTVKSAASKFLLEWLLQHEHEHRQWSGAISLGLISSCLHVTDHKQRYHNITGLLEVLFVSKSSLVKGACGVGLGFSCQDLLTRVEADNSTVERERDKVPESELLGRIVRALSTMIHESTQPSSDVLDSLCSCFPPGSYDVNAKVFEPSSENNKDLEEDIWGIAGLVLGLATSISAIYRAGELEAVLKIKHLVISWLPYVNSLVQSTSFWGEGSEIGLALGSCIALPTIVAFCQRMELMAEIELDHIVVGFKELISEIISVKKSGILHQSLLMASCIGAGTVLSCILNEGVHSIEVECVKGLLELFRKCYSNPFPYLIHLGGMLGVVNAMGAGAGILVYMNFPNYTKQSGYQKKESSSVMGPLLVSSVFEPYLTSLVQEMFLVAQNSDNHQLQQFASWVLTFLRHHLWSKELLGVEGDRNVAETNSKSISQSFSEDNVVLKLSLWLMDFKYTEPGTIVHVCTVVAILRCLSRAPRLPNLDWGAIIRRCMRYEAKVSELLPADSTLKQETLREECVQFAFAHANQFDSLLAFLDELSDVSRFRTLELNLQSCLLIHLADFVKVYSSSRLEKLFGDVSNHLSSFTSYEESGNYQKSLLCISCWKGLYECLDEVSVDTSGHISHVERCMVVLFTLLPVVQSSGSVVSGEVSSVEEWSEAVRCLGKAPRSWLLDFLKVSHEEFVQNADKSIEVQKKVRAKIKLVKTGSLPPIELGKMKSYILHSKSQGLWDVLIEVVVALHHAEGSIKRQWLVDAVETSCVSSYPSTALQFLGLLSATCCKYMPFMIVDQQMVLNDLPVTLVSLLADRSWDVIAETVVSHLFSSTERIYHWAMQIADGSYIPGTQPIDESENHMAVFILQVMHHTCVLLKGYLPLDKQLRLASMVIA*
>comp32777_c1_seq1
MKFYVFDEIICIWFNTEFLSPHASSNMVLTKLCHSFINFTNSYWWTSFCL*
>comp165855_c0_seq1
MNWQKLLSIDLEDTPMIGVLLHYCLEVRIAWNKSYTNHLSSTWHHTFSCRYIEGPRFNHKPNTVKYLIVDL*
>comp133936_c0_seq1
QGKNHHLLRTQNVSKVRKYRFEHHINIIKHVNLTTKLKQLEVSIL*
>comp13425_c0_seq1
MDVTIVPSLKDNNKQFPLNGKFKIACVNLLFYFFNGPIDFYVIVLCYHCITFMPNAYTSHG*
>comp281327_c0_seq1
MHKREEQYKSDLASMRIRMTEVEELLSSSKADHLKEVNESKQRLDEMRNELEDYKARARKSLADKEALILELKSGNPVGPQTESMEITQLKNELETISSELE
>comp59448_c2_seq1
MALSATFTSPSSPSLNLSAKIRRPFLSHSVNLLNPLKVRASTTLDYSNVSANDKPLPSPLKASNWQWKFKDNFVNIYYEEYVKESQEPSQNILMMPTISDVSTVEEWRLVAGDIVQRNGKVNWRATIVDWPGLGYSDRPKIDYNADVLEKFLVDFINSANGPIKQPENDLIIFGGGHAASIVIRAAKKGLVKPKAIAAVAPTWAGPLPIVFGRDSSMETRYGLLRGTLKAPAVGWMMYNMLVSNENAIQSQYKSHVYANPDNVTPGIVESRYALTKRKGARYLPAAFLTGLLDPVTSREEFLELFADLEGKIPVLVVSTKGSPKRSKAEMEALKGAKGVSKFAEVPGALLPQEEYPAMVAEELYQFLQEYFGSAA*
>comp41064_c0_seq1
MSIVDITYKELSQIKIQQKTDQLTTAMMKRNDFFHESIEISPSSIGRHSLSMLTSSARLIYHQQSQTNGRYSKMLEASA*
>comp55982_c0_seq1
MLEPRFGATIFLCLLSWSLAPMADSAIGFNWGTISFHRLKPSTVVDLLRDNKIQKVKLFEADPDVLKALIGSGIQVMVGIPNEMLPLMSSSPAAADLWVRQNVSAYMGKGGADIRYVAVGNEPFLTSYNGQFQNLVMPAILNIQQSLVKANLAGYVKLVVPCNADAYESSALPSQGAFRSELTQIMTELVQFLNSNGSPFIVNIYPFLSLYDNGDFPQDYAFFEGTTHPVTDGTNVYTNAFDGNYDTLVAALSKLGYGQMPIVIGEIGWPSDGAIGANITAARVFNQGLINHIVSNKGTPLRPGTPPMDVYFFSLLDEGAKSILPGNFERHWGIFSFDGQAKYPLNLGLGNKELRNAKNVQYLPSRWCVANPSRDLTNVVNHMGLACSVADCTTLNYGGSCNEIGEKGNISYAFNSYYQLQMQDSRSCDFDGLGMVTFLDPSVGDCHFLVGVKDKGSDSSTSQTTYQWRVLVLFLILHWIFSLSM*
>comp32417_c0_seq1
MQASISLHPDTPKPKDSINYRIPQNDSVRILNKTFIADHRKKLSHKKGVALHCKNVSNSLAITTHNTQVKGRSSLRLYASDVN
>comp45298_c0_seq1
MSDEGMDLCGVIWNHEMTMRRLLSLLRQSQTTCSDTECYAPIQTNSGNDGFMMMTLCWMAVAFLLYIMRPSSIRNRENNMKPARGNGDNEDGGNPPASPAI*
>comp46222_c0_seq2
MDFWPEFLANSWGREFVAGGFGGIAGVISGYPLDTLRIRQQNSNTGSAFSILRHMAAREGPAALYRGMAAPLASVTFQNAMVFQTYAVLSRAFDSSVSAKDPPSYKGAALGGVGTGALQSILLSPVELVKIRLQLQNTSQLTESQKGPVRVTKNIWKKEGLRGIYRGLGITVIRDAPSHGFYFWTYEYMREQLHPGCRKNGQESLDTMLIAGGLAGVASWICCYPFDVVKTRLQAQTPSSLKYKGIFDCLKKSIKEEGYAVLWRGLGTAVARAFVVNGAIFAAYEITLRCLFNNGNIQMHETI*
>comp2987_c0_seq1
MGFLDSFVGFFYGVRQRGIETTEEMMKEGSVITAIGEVSKDNQGLLQLSSSSRGYPYFLTSMPITSLLRKLEEQKRTYKWLTYLFGSIGLVISYKILKNWYEKRKEKIRDEELKRKLQETRKERRKNARTGHDLQENECCVVCKENPKEIILL
>comp41020_c0_seq1
MGIPAGTAPFGDLNSGIFHPWGRGRKFPRDQFEDGDEDYIPCPAGTRPHLITKLFLLCIYMLTNLSF
>comp41457_c1_seq2
MQIRVRCNCGEGTCEEWAIVELQGVVEAQPGFHDCLTNLEIGTLCRPSSQEVYTFTVGYHELTGSKVALKKPTLVLKKIKYPDEEGGCKVELQVVGIIRHRILFKTRPKAIISKPQITSRERQKPIMLGSVPSNQAA*
>comp122140_c0_seq1
MGMFLDFLHCLAIFPVCYPMNMMCTFFIICLKFGSLLSCESHNMIVCVVSTCFSFIPSNWKYGKFEG*
>comp8247_c0_seq1
MDGSRTYGESSRNNPRINETQKQVDEVVGIMRTNIEKVLERDTKLSELDDRVDALNSSAIQFEQHATKIKRKMWWKNLKFTLILGGIIGIFIIIMIIWIVSSVSGEKQ*
>comp223719_c0_seq1
MSFWGAKHAMYSLEFIFSCKPNTKRHTDICTAIQICTMIGT*
>comp39833_c0_seq1
MIHALFLLEDYFLYISQLLRMVLGSKRCSLSKIKKWLLLRDFLTYGIG*
>comp57670_c0_seq4
MKCRSVACIWSGTPFPHRVTAVAAFAHSFYTSGSDGSIIWWTLSDSHSTSTPEVKAVGMLCGHAAPITDLCICSPIAAEENVDRSSNLVKNSTSSNFSALISACTDGFLCVWSKSSGHCRCRRKLPPWVGTPCMIRTLPSRARYVCIACSFMDSVHLSDHYPGNSTEGNEGLPDRETHPGKPSKCTIVIVDTYSLSITQTVFHGNLSIGPMKFMAVVLADNDEERHSVFVADSAGKKQVISISRDTHDHGESLTSSHKDTSQLESSFCSEGLSSMDQIISILTYGNIAAFILKNRCIFRLLSSDTKIGEVSFVDNLFCSDGHSTQAHVMGGIFLESDDVGNMPNTHEFRNLIPGHFVVWNNRGSAIIYKISYQDDVFQCEPHSEIPATHYQPDMRLSIFFLQVNHYLVCIKSVCFHYEEPLLWRPHVTIWSLHHFDDKPGKLYRQCRMIRDGVSFSNWFEKSTQIKGLGGLETKSTFSSNPSSEDKHDIHVDDINNYVYKGRIVSSSMIISENLFTPYAVVYGFLSGEIEVVRFDLFQGICFDGASSNPNDKSTACKQYFSGHTGAVLCLAAHQMMGSAKGWTLKRVLVSGSTDCTIRIWDLDTGCLIIAMHHHVAPVRQIVLPPSLTGYPWSDCFLSVGEDACVALVSLETLRVERMFPGHMKYPSKVVWDGTRGYIACLCQTHYGTSDATDVLYIWDVKTGSRERVLRGTAAYSMFDHFCRSISMNSVSGTLLNGNTSISSLLLPIVDDARFSNSPFSLSENLLTSSRSSPSISNMTELNSPQTHAGKGNSSKPNSSSLFGLWSNKLPIKCSCPFPGIVSLSFDLGSLMFSYQKNESTENGGCKPVNVNLKQQGVQEQNPCDHNPETLEGHDWVSLFEEYLLRYSLSFLHLWSVDSELDNLLISDMKLRRPEHFIVASGLQGDKGSLTLTFPGLSAILELWKSSSEFCAMRSLTMVSLAQRLISLSHSGSAASSALAAFYTRNFMENFPDLKPPSLQLLVAFWQDESEHVRMAARSIFHCAASHAIPLPLCNSKPTEPSNMRSQTGSRGKQLGDTTAETISPKAEKQGISQAEESKILAWLESFEMQDWISCVGGTSQDAITSHIIVAAALAIWYPSLVKPGLATLVVHPLMKLAMAMNEKYSSTAAELLAEGMESTWKECIVSEIPRLIGDIFFQVELSGPSTNSVAKIPACSFSIQKTLVEVLLPSLAMADIPGFLTVIESQIWSTASDSPVHLVSLLTLIRIVRGTPRNLVQYLDKVVNFILQTIDPSNSVMRKTCFQSSMTTFKEVVRVYPMVAVNDAWTRLAVGDVIGEINNPSIRVYDMQSVTMIKVLDASGPPGLPSLLTAASGTMLTTAISALSFSPDGEGLVAFSEHGLMIRWWSLGSVWWEKLSRNFVPVQCTKLIFVPPWEGFSPNSSRSSIMANILENDRQLNFQENVKDSSHGDGLKQLLHNLDLFYRLEWVGERKVLLTRHGHELGTFQL*
>comp24309_c0_seq1
DQGVGSWVSVFHKGKGKRFSQLNWSRTTK*
>comp14333_c0_seq1
MRLEMANFLKFLRGASHNIYEDIRSIPSKAIG*
>comp292764_c0_seq1
MRRLRVFSLFRFFFNLNLSVYADCCDLTLEGLLFCFMKKRFPLLFSTTFFEIYCNLL*
>comp24516_c0_seq1
MSTDFYIRYYVGHKGKFGHEFLEFEFRPDGKLRYANNSNYKNDTMIRKEAYVHKCVMDELKRIIVDSEIMQEDDSCWPQPDRVGRQEL
>comp55867_c0_seq1
MEERKFVCKYCTKRFPCGKSLGGHIRTHMTEHSTQANKERSNAATLKFDAGRKRKRDLGSEADDGDGGNPIYGLRENPKKTIRFVHSNATLQQEKFCKECGKGFPSLKALCGHMACHSDKEKGTNKFENNSGLSEKQKLVMDSQSDTETSAPTHPRRSKRMRFKTLSNHPSSSVPLANGSSSVSEVEQEQEEVARCLMLLSKDSSHRGRFALVTESSDNNSVVLEAKSTSLDTRITINNGKKNSVSNACELVEKKLHKDMKFKSAEIEASDNSDSGYFRYGPKKVDSDVSNDGFFRNDEVKTPKVGDMFGFEDYDVESSKMLNRGRSRNTEFKKLVFEDLDYNTADGATRKFDSRKRPSYDSLGQTLVGISNKKKVNGFTTNDEIYEQGGKGWKYECLTSERDHGSYDSTYESDENSTDTDSYPAPKAHNSKTLNGKKSSKGKKKLKSKKNKEHECPICYKIFRSGQALGGQKRSHFVGGSEKNTLVIKQVAAAVPCLIDLNLPASVDE*
>comp44903_c1_seq1
MVPPIQTKEAQAWVIIMEDKAKPKQLNQESPSLDSRTSNCTLLSKPKYHCPFMAQSEPLP*
>comp59673_c1_seq1
MHSKVIKQITRSENRLGSLAGAYGQTFIGPILFIK*
>comp59598_c1_seq1
MTPHLSHLKSLECESYQLSKHVRASFPSKPPRQANIPFGLVHSDVWGPSRVNSILGHRYFVTFI
>comp55377_c0_seq1
MSPLFALYGDLGLEFANSMSGNVICCLRVVRWFFFSLL*
>comp57669_c0_seq1
MQCTQAKTRTHATNKTSHNPESCTSSFFTKERRCHHHVCGKYKDKRRTVLFEVQYGKWLL
>comp43712_c0_seq2
MDLFKAVVRNSYCFPIIISCVC*EGFLHTLQRVLHSTV*ILLTS*FDCTD*FWCHIL*SN*RSAILSVCKNFSRVRCMCGLATSFRLSAFSPLDILEMVKVVLFQIALSFLSGLVLYMTLSSISAT*
>comp14941_c0_seq1
MHMHTKSQTK*KLKRTYKKSSG*LQRRDILIS**REGLFQSLSLSFTTECIYRHQVRNNIFTSICQASSK*ST*REAMAKN*
>comp48414_c0_seq1
MLCLFVCFLLCYLKILHDFHISLAPCVINYEISGFIFLTFVLTIGNRLWLAGC*
>comp348509_c0_seq1
MFLFLVSHFGSTYSQSRAELNLLGCYYSESYLFSSKFMILDVSHSLCQENYIPT*
>comp170227_c0_seq1
MLSALFHSSFLAYIKQTSLKNLFISITNLSFQINKS*
>comp44632_c1_seq1
MALQPVVEHPRKAFGWAARDSSGVLSPFKFSRRETGEKDVAFKVLYCGICHSDLHMLKNEWGNSTYPLVPGHEIAGVVTEVGSKVQKFKVGDKVGVGCMVGSCRSCQSCADDLENYCPKMILTYGAEYVDGTITYGGYSDLMVADEHFVVRIPDGLPLDAAAPLLCAGITVYSPLRYFGLDKPGLHVGVVGLGGLGHMAVKFAKALGAKVTVISTSPNKKKEAIEHFGADSFVVSREQDQMQAAMGTLDGIIDTVSAVHPLLPLIGLLKSHGKLV
>comp50825_c0_seq2
MGCIYIAWLLLTQFLMVVSEAKKVPAVIVFGDSSVDSGNNNLIATVLKSNFKPYGRDFDGGHPTGRFCNGRVPPDFIADAFGVKRSIPAYLDPAYTIKDFATGVCFASAGTGYDNATSAVLNVIPLRKELENYKEYQTKLRAHLGVEKANEILGEALYLMSLGTNDFLENYYVFPTRRTQFTVTQYQDFLLGIAENFIRELYELGARKISVTGLIPMGCLPLERATNIFGHHGCNEEYNNVALGFNKKLENTVSKLNRELPQLTSMSANAFDIFNDIIRRPSSYGFEVVEKACCSTGTFEMSYLCSDKNPLTCPDANKYVFWDAFHPTEKTNRIVSNYLIPKLLATFR*
>comp35685_c0_seq1
SSWSELKVAGSEVEEEIKISEESKKKETKIEKSQGVWSEFEPESKGKKRKKEG*
>comp60064_c0_seq1
MASTMAVSLSPWITSAAIRARTPSASLTFLTGSRPRSLSFNVARNSSTTRSALLHCSFLSSPSSLSFPYSLSGLSLGLDLTSNVGARRGKGRGLVVRAGKAALCQTKRNRSRKSLARTHGFRRRMRTPGGRAILKRRRAKGRKVLCPKSNPNSGKRA*
>comp282748_c0_seq1
MTGQAVNAFVSLKDGVDSGEGTRKELVMQVRKQIGPFAAPKAVFIVEDLPKTRSGKIMRRILRKILSGEEDSLGDTSTLSDPSVVDKIIDTVKQNKK*
>comp18594_c0_seq1
MGNLFGKKKVSRVTEHDKAVLQVKQQRDKVKQYQQRVEAKLEGDRQLAKKLLLSGQRDRAKLLLKKKRYQESLLERTEGQLENLERLIQDLEYAQVELKVVEGLKFGNDALKKLNDVLDIDEIERILEETNEGAEKQQEINALLSGNLSVEDLEDVEREYNELLEMEEAEKNGELKLPDVPPNEPFMQSNVSPKEIKKEKVALEAS*
>comp647238_c0_seq1
MAMFDKFTKDQFLQICSISYSKLHHPVLVLKK*
>comp47402_c0_seq1
MPSTTASGRDSPGDLAASVALRSEFKFKEYLILSYQTGP*VSEERYEGFGNFEQ*HRLVDQELNEAEVLQLLPFKSLSSKIVVKRSALSLERFLKDH
>comp60151_c0_seq3
MLSSSPGFFRPSRGATSTRFGSALNIETLVAAAEKRETPIEAPGSEVQDKISFIINNISAANIEAKAKELAEILKEQYYPWFAQYMVMKRASIEPNFHDLYLKFLDKVNSKALNKEIVQTTYENCKVLLGSELIKSSSEERSLLKNLGSWLGKLTIGRNQVLRAREIDPKSLIIEAYEKGLMIAVIPFTSKVLEPCQSSLAYQPPNPWTMGILGLLAEIYSMPNLKMNLKFDIEVLLKNLSVDMKDVTPTSLLKDRKREIEGNPDFSNKDVGASQTQMISDIKSGLVPPVNQVELPLEVTNPSNTGAHPHILSQYAGPLHISTGALMEDEKVTPLGLSDQLPSAQGLLQATPTPTPFSISQLPTQIPNIGTHVIINQKLSGFGLQMHFQRAVPIAMDRAIKEIVSGIVQRSVSIATQTTKELVLKDYAMESDETRILNAAHLMVASLAGSLAHVTCKEPLRASISSQLRTSLQTLNIANEILEQAVQLVTNDNLDLGCAVIEQAATDKAINTIDTEIGQQLSLRRKHREGMGPTFFDANLYTQGSMGGLPEPLRPKPGQLSLSQQRVYEDFVRLPWQNQSGQSSMSAGVAVQSGNAGLTGNNGPASGQINPGYSASMGYEGVSRPLDDMAESNLASHFSASSIHIRAADTVSQHSLEKDSVASFPSTASTPELHTVDPSDAVKESGASSQPLVSPVTGERLGSSFLEPSLTTRDALDKYQIVAQKLEALVNNDSREAEIPGVISEVPEIILRCVSRDEAALAVAQKVFKGLYDNASNNIHVCAYLAILTAIRDVCKLAVKELTSWVIYSEEERKFNKDITVGLIRSELLNLAEYNVHMAKLIDGGRNKAATEFSISLLQTLVIEEPKVISELHNLVDALSKLATKPGSSESLQQLVEMVKNPAANAAVLSATNAGKEDKAKQSRDNKGPGLLAANREELNIVESVEPDPAGFREQVSMLFAEWYRICELPGANDTASTHFILQLHQNGLLKGDDLTDRFFRLLMELAIAHCLSTEVINSGALQSPQQLQAMSFLAIDIYAKLVFSILKGSSKLFLLSKILAVTVRFIQKDAEEKKASFNPRPFFRLFINWLLDLGSIEPVTDGANLQILSAFANAFHALQPLKVPAFSFAWLELISHRSFMPKMLTGNGQKGWLYVQRLLVDLFQFMEPFLRHAELGGPVHVLYKGTLRVLLVLLHDFPEFLCDYHFTFCDVIPPSCIQMRNIILSAFPRSMRLPDPSTPNLKIDLLQEITQSPRILSEVDAALKAKQMKADVDEYLKTRQQGSLFLSELKEKLLLSPNDAASAGTRYNVPLINSLVLYVGMQAIQQLQGRTPHAQSAANALPLAVFSVGAALDIFQTLIVDLDTEGRYLFLNAVANQLRYPNTHTHYFSFILLYLFAESNQEIIQEQITRVLLERLIVNRPHPWGLLITFIELIKNPRYNFWNRSFIRCAPEIEKLFESVSRSCGGPKPVDESMVSGWV*
>comp19751_c0_seq1
MIQCVCIIMADVNRTFLNCLPVLLGQLSRPDI*
>comp37929_c1_seq1
MTKVIRVVIPDKYLDEKTVFHVNPCGLFITGGPQSDAGLTGRKIIVDTYGGWGAHGGGAFSGKDFTKVDRSAAYAARWVAKSLVKAELCRRCLVQVS
>comp53709_c0_seq1
MNWAKEGWRCLSKITKPHVSGVMDLQGNVVAKLNPMILSPRFVSGIKNGNEVDNQLTRDFLVKLWVADRKMKNSRGKERRKLVKYRGDGEPRWFSGSSVVDDSVVGKGKRVLKQPPLSQSVSEFLDPESPEEAKVAPLLARSNLLITRDIEWANLVFGFEQENRYAIVDVCYPQSPVGFIREQSNIIARQLLRLRRPFVAYITDAMGNELFRVRRPFWWITSSIYAEIDGNWCSSQAVASLEENI*
>comp375505_c0_seq1
MTIVSASRTPIQITVLQAVLIWQNYVMWPKSLGFASCASQVKLCHGLQFWKV*
>comp88281_c0_seq1
MFISVSASACKQVQPLVNFQKGLTMESLFHHRQDKVVVILGATGTGKTKLAIDLANHFPPAEIVNSDKMQVYKGLDITTNKVTEEECRGVPHHLLGMVDPNSNFTANDFCRHASLAIDSIVGRDGLPIIAGGSNSYIDALVNHHPEFRLRYECCFLWVDVSLPVLHSSLQARVDRMIEAGQIDEVREFFDPCADYTRGIRKAIGVPEFDEFLRAEAVADDRTKKRLLEAAIARIKINNCTLANRQLQKIHRLHNMWKRNMHRLDATEAFLKSSRDEAEMAWEDHVLAKSHRIVHKFLYEETHVPAGIVSPKAVISAATISVQPPPPQVAMAAVAAGTH*
>comp45427_c0_seq1
MSQRNVVSWTSLMAGYVGQGRPNMALCLFHQMQGTLVLPNEFTFATLINACSILADLHIGRRVHALVEVMGFGSNLVVCSSLVDMYGKCNQVDEAWLVFDSMYVRNVVSWTSMITTYAQNAQGHHALQLF
>comp289887_c0_seq1
MIQAADVGIGIAGKEGKQASLAADFSIVEFSSLLRLLLVHGRYSYKRSASLSQFVIHRGLIISTMQ
>comp35877_c1_seq1
MALTTIKIKYKFPISTIEEILDELHRAMFFLKLNLRSGYHQIRISEKNIHKTAFSTCMGHYEFLVMRLMPFGFTDAPSTFQATMNKVFRPYLRKFVVFFIF
>comp45180_c0_seq1
MGKDVDKHMLMSDGICRERSLSYSFKVLSCINLIQAFGDLTSNVLFLASVHASCARWLHGVA*
>comp163845_c0_seq1
MHSKGKQKYISILSVHLKKSLQVNDRKLENR
>comp162583_c0_seq1
MQIHSAIPLLPFLIRFSLVYSPLPLLIQIHFFPLPVLLIFNLNKISLFSAAYYGPEVKW*
>comp31469_c0_seq1
MLMHQIEALVEAGVKEVILAVSYRADQMEKELKEEAEKIGVRLVFSHETEPLGTAGPLALARDLLTAGSEPFFVLNSDIICEFPFKELVAFHKNHGKEGTIVVTKVEEPSKYGVVIYDDAGKIESFIEKPQEFVSNKINAGMYILNPSVLSRIELRPTSIEKEVFPFMAKDGQLYAMDLQGFWMDVGQPKDFLTGMCLYLGSLRQKSPNLLYNGTGVIGNVLVHHTAKIGEGCSIGPNVTLGPNVVVEEGVCIKKSTVLENATIKSHSWLSGCIVGWKSTVGQWVRMENTTVLGEDVIIKDELYINGGQVLPHKNIADSVTEPRIIM*
>comp39183_c1_seq1
STCFLFEVSHSVFCCCLCFLSLHNNTFINLPNCRKSFRD*
>comp353086_c0_seq1
MTLFARRCNSQTKSKSVMCLLYWL*
>comp212148_c0_seq1
MSILYSNF*VIFVARAVHDSQ*TLVLASLLYDVQYALYASFLLGQEGIGEFLF*LSIVFSPVC*RTMFG*
>comp45916_c0_seq1
MSQNSFVIRVSLNIFNASNFLTFISSNFLDETVFYKIVVCEVGRKLLLLN*
>comp45462_c1_seq1
MEKNLKDNRIRYYRFAYCNDVVPRLPYDDNNFMFKHFGTCLYYDRSYKGEMVQEEPNKNYFSLFAIIPMMVNAFWELIRSFTIVFKYGSDYREGWLLRFFRIVGLAIPGLPAHLPQDYVNLTRLGSILSHFD*
>comp122823_c0_seq1
MPRVPAVHSKTYVTPRRPYEKERLDQELKLIGQFGLRNKREVWRVKYTLAKIRKAARELLTLDEKDPRRLFQGNALLRRLVRIGVLDESRMKLDYVLGLRIEDFLERRLQTQVFKHGLAKSIHHARVLIRQRHIRVRKQVVNVPSFVVRLDSEKHIDFSLNSPFGGGRPGRVKRKNLKKGPSDGAGGDDGEDDEE*
>comp123678_c0_seq1
MLATSTDELQDGTVSSYDRKSELKAFDDSKAGVQGLIENGVTKVPRMFYCGQSNLSDGSAIESKFSIPIIDLTGIHSDSIRRDDVVGKVRYACEKWGFFQVTNHGISTHVLDEMIKGTCRFHEQDVRVRKQYYTRDLSRKAIYASNFGLYQDPAANWRDTLGCFMAPNPPKAEELPEVCRDIVIEYSKKVMAFASTLFELLSEALGLDRFHLKEMGCAEGLLLICHYYPACPEPELTMGTSKHTDSDFMTI
>comp366099_c0_seq1
MLQTFWLIVDHPIAVLLNVINVIGLMTAIWCLIIKY*
>comp511112_c0_seq1
MHVVFPPLPVTVTYSNFFFLFIKIKKIFWIQNYKTFHYIKKPLAHT*
>comp504737_c0_seq1
NKLIIQWLLKPSSKW*
>comp223895_c0_seq1
MLCEKFEVQTSIKNQMKSHELKAKIVQASSLILFEFGYNFELY*
>comp36060_c0_seq1
MPNVTYSLCWGFNPWKLVDGYNSSVDELQKSGSKLGYLSLMSMTIVCFFHIH*
>comp54463_c1_seq2
MGIKGLTKLLADNAPKSMKENKFESYFGRKIAIDASMSIYQFLIVVGRSGTEMLTNEAGEVTSHLQGMFSRTIRLLEAGLKPVYVFDGKPPDLKKQELAKRFSKRAEASEDLSEAIEAANKEDIEKFSKRTVKVTKQHNEDCKRLLRLMGVPVVEAPSEAEAQCAALCKSGKVYAVASEDMDSLTFGAPKFLRHLMDPSSKKVPVMEFEVAKILDELNLTMDQFIDLCILSGCDYCESIRGIGGQTALKLIRQHGSIENILENINKERYQIPDDWPYQDARKLFKEPMVLTEEEELNLKWSAPDEEGLITFLVNENGFNSDRVTKAIEKIKAAKNKASQGRLESFFKRAANPSVPIKRKETPENIAKETHKRTKASGGKKKK*
>comp38499_c0_seq2
MHKIQKASTWVCVSIHIQRHKLLWDWLSGLVCVLNLYGIISPTKDQACQHLTKFKASNSRSRGNIKFLQKPH*
>comp373613_c0_seq1
MFGFMSKNGVKVFSKKQMFIIEMENELKILE*
>comp54564_c0_seq3
METMPSVLKKYFGFSDFRPYQKEVIEKIIEKRDCLVVMATGSGKSLCYQVPPLVVRKTGIVVSPLISLMQDQVMALKQRGIRAEYLGSSQKDPTVQTKAERGLFDILFMTPEKACLIPTSFWSNLLKAGICLFAVDEAHCISEWGHDFRVEYKKLDKLRGVLLDVPFVGLTATATEKVRFDIISSLKLNNPYVVVGSFDRTNLFYGVKPFKRGQPFVDELVREISKEVASGGSTIIYCTTIKDVEQVSKSLAEAGIEAGMYHGQMDRKAREESHRLFVRDELQIMVATIAFGMGIDKPNVRQVIHYGCPKSIESYYQESGRCGRDGIASVCWLYYTRSDFAKANFYCGELQTENQRRAVRESLLAAERYCLLTTCRRKFLLEYFGEKFSADRCGNCDNCRVSKKERDMSREAFLLMACIHSCKGKYGLSMPVDILRGSRAKKILDAQFDKLPLHGLGKTYPSNWWKALGHQLISHGYLKETVSDVYRTISVSSKGEQFLASSRPDYQPPLVLSLTTEMLGEEENTQEEIKILVTSASKGFSEAEGQLYHMLLEERLKLARSIGTAPYALCGDQTIRKITLTRPSTKARLANIDGVNQHLVKEYGDHFLQVIQKLSQGLNLSLDGEASLQTDAVRKLSPLTNKSRKLTPAKFEAWKMWHEDGLSIQKIAVDQLL*
>comp12819_c0_seq1
MLGKKMVSLKKLAKKVKAVGGGDPDPPQHECLLKGYEEESPSNTTPTGFFALYVGEERRRYVVPTSYLSHPLFKMLLEKAYNEFGFTQRNGLVVPCSVSTFQEVVNAIECNNGKFDLGKIFEEFV*
>comp278662_c0_seq1
MPYLRYVYIVSNTSYAMLEPQKNTNEVTNCHTQPNTTK*
>comp52915_c1_seq1
MPQRDHFSWNAAISGYVSHDRPLEALELFRMMQKHESSNSNKFTLSSALAASAAIPCLRLGKEIHGYLIRTGLNSDEVVWSALLDLYGKCGSLDEARGIFDQMVDRDVVSWTSMIHRYFEDGRREEGFALFR
>comp59998_c0_seq7
MEPRKEFHPASQSAPQDHLDGMHINARPSGFNMSENKPVLNYSIQTGEEFALEFMRDRVNLRKPVFPNVMGDPNYSTGYMELKGILGHTGSESGSDMSVITKVEKVPKEFDRRNSCLHQDRSNYGSARSIPRTSSNQDNNRVLHGIASSGVSYSSSMKMKVLCSFGGRILPRPSDGKLRYVGGETRIISIRKDIRWKELMRKMSSIYNEALVIKYQLPGEDLDALVSVSSDEDLRNMMEECHDLENRGGSLKLRMFLFSMNDWDDTQFGLGSSDGDSEIQYVVAVNGMDLGSRNNSILHGASTSSNNIHELDGQNIEREASRVPVESFGVSSSSLAGNVNSSSQPMLPTSSNAYETYPVFYDDRIIGHGETSQYPLHHGLDPSNNFALSLGEIPVSVPTHGLVNQEIVNEGQASSELQVRSLDMPTMQVKTKGDNFIHTGNDPGKVFSMETPYPVPLQPFEGNLQGNFSEASVTVAVSEGHHPTMLSKNMDKHQQSEESSLLVGTMNSTQIPKSGEDDLYTTSIDAFGHAHVDAESNVIDFSFLEPPPLPNRVYYSERIPREQADLLNRSAKSDDVHGSHLLMSDLLSDFNQKNSVTESSDILHDGNLSNLNTVSSLAAKPLHADGHTIDDGFAQLQKYKPLPDATSQVNSKLSQLVDSELKLVLADNKVSRNEDQVLRPENETNHSKDNHNIPLVDETNRIEHLAFRQVPSVEHDDNPASKLPDLNWGEVSTKESNNVTKVQAQPFALTGNTSQDVSQDFPSDAISRPAQGDILIDIDDRFPRDFLYDMFSKAIFSEDSLNIGPLPTDRAGLSLNMDKHEPKRWSYFQKLAQEGFDNVSLIDQDHLGFSSALRKVQEGDSKSQKSAPLPADGVLAGNVESHLNFGEENQKNLHVTTRMEATVFHPNYDHSQIKDNENKNMDTMMENRRPQESEYEDGKHEARNVGLPPQDHSLGDFDISTLQLIKNEDLEELRELGSGTFGTVYHGKWRGTDVAIKRIKKSCFAGRSSEQERLTEEFWREADILSKLHHPNVVAFYGVVQDGPGATLATVTEYMVDGSLRRVLLRKDRYLDRRKRLIIAMDAAFGMEYLHAKNIVHFDLKCDNLLVNLKDPLRPICKVGDFGLSKIKRNTLVSGGVRGTLPWMAPELLNGSSNKVSEKVDVFSFGIVLWEILTGEEPYANMHYGAIIGGIVNNTLRPTIPSYCDLEWRTLMEQCWAPNPAVRPSFTEIARRLRVMSAAASQTKGQGHKASK*
>comp51542_c0_seq2
MVFLCWGRPSPQDQKGCIHKSGTLNYDAKYEGATAKSLSSLKEDKGFSKDGFLLNHARVFVGSGIETFEKGKSALRSWRHFGLNWAFVDPKTPVQQGVKFCVCVKEFLPWLMMPLQVVYVNESSTAKNRVASFGFGSGTLHGHLLAGEERFSVEIDENNQVWYEILSFSKPAHILSFVGYPYVMLRQKYFAHESAKVMLKHINSSKS*
>comp34931_c0_seq1
MVRSPCCEKISVKRGVWTAEEDAKILAFVSNHGSGNWTSVPKKAGLKRCGKSCRLRWTNYLRPDLKHDSFAPQEEDLIIKLHAAIGSRWSIIAQQLPGRTDNDVKNYWNSKLKKKLSQMGIDPVTHKPFSKLIADYGNIGGCQKPSTRIGSVNKDFKNAILLKSEPYQTLPQGFRNINSQQKQPSTSPPKMEPIENSFLFNNSHTDNLSMDLAQLQAIPMVPGASNCIDIENETIPASIYGEGCLSTTSSPSTSTCSTAAQESLPVPFSWNDFLLEDAFATPADNQEQEILAGFLSKDLVSQIENVTRQSWNKKEIRSQQGPSNDFPFASSSDISFVEAMLDQENEMFLSFPHLMEEPSNY*
>comp382817_c0_seq1
MWVYIRDLFKRVSLLDMQRYLKALFSSCTSVFFNF
>comp56042_c0_seq5
MYIFRAIIDVCGLCGDYMKSRYIYEDLLNQKITPNIYVFNSLMNVNALDLIYTLKLYQNMQNLGLKPDMTSYNILLKACCVAGRVDLAQDIYKEVKHLESVGRLKLDVFTYSTIIKVFADAKLWEMALKIKQDMLSAGVSLNTVAWSSLINACAHTGLVEQAIQLFEEMLLADCEPNTQCFNIILHACVEACQYDRAFRFFHSWKGNKMLGTLGKGYNSNLKQRDMHTATNSHILSFAERFPFTPTTTTYNILLKACGTDYYHAKALINEMKTVGLSPNHISWSILIDICGGSGNVEGAIEILKTMCDAGIKPDVVAYTTAIKVCVESRNFKQALSLYEEMKRYDIHPNLVTYNTLLKARSKYGSLHEVQQCLTIYQDMRKAGYKPNDYYLEELIEEWCEGVIQDNGENQGEFFSSNKSEFERPQSLLLEKIAAHLLKRVADILAIDVQGFTKVEARLVILAVLRMIKENYGLGHPVNDDMLIIIGATKADETPAEDILEVKEAITKLLRNELGLEVLPARTRFALNDSVKLENPNLSNINLEAIPGQNALPTIMGFQTRRPAVLQRLKVTKKSLYHWLQRKVSISSI*
>comp533571_c0_seq1
MSGFLSHSILFRNSILKASLAFCMVLYIFPTCML*
>comp251714_c0_seq1
MIFLVGYACSKYLMFAIPFNLGFTNPCLAYDSFFAAIL*
>comp25684_c0_seq1
MDDDEPSKQLQLSRPNGTRRGSLRQRWSDSLEEDTARLGCYERMTTAQDQTSWRRVLVEAKAYPGL*
>comp160975_c0_seq1
MKDYIMLILDLSNTYARDSPYVEICTRGYAKLNH*
>comp58209_c1_seq1
MRLYSSGFTQPAEEEGEKKCLNSELWHACAGPLVSLPPVGSRAVYFPQGHSEQVAASTNKEVDAHIPNYPNLPPQLICQLHNVTMHADAETDEVYA
>comp16348_c0_seq1
MTLFYPYNPAIDRGNDPVSQFSAKSQLLQNSLSEMLTRFYPLAGRLQDTATIDCNDEGAFFIEARTETPVSDILSNPDFDTLEHFLPSIDKETMEISNASMLLVRFTLFGCGGTAVSISLTHKIADI
>comp393761_c0_seq1
MHPLDEVLDSVQEQSWLAFRLLFFFITL*LPTDGHKSRKIGCPSFPLLD**MALKSA*
>comp51812_c1_seq1
MPASPLPSLESVDTLIQSPPAEPTQSDPVSPQSSGLLEAIIYKSKISKGSNKNSLQQAPDNCVPNEVVKSSTLNPCKTEWDEQGEPNSPLGQSAASVLTDYTPISLCSVDGPQSVETTQDHDIKHETVTQDPAFCSRKKENLNQIDFTRPDALLDLGWFGNGTEYGKDQSVLKDAIGALLSDDFHGYH*
>comp354218_c0_seq1
TITCEGTHTSIFYQTKNCSVK*
>comp21691_c0_seq1
MKIQESIMVLNGESKTIQVQFFPTRKSTSKITTPAPLSFLVQNTQPFFYSGPLLI*
>comp506500_c0_seq1
YLKTVVFKYLKCYYIICYYFSTSEKNLRLILTRTHHIIIQKDQNSIQEFRKINQSRSRNDL*
>comp48036_c0_seq2
MADNYQKGQHGRESRRVSGLTVLSASLAAIAIGGFLLGMMGFSLLASATLLLVCSPLLLLFSPLLLGVAFLLIGTLAAFAVAAAMALTGVSMLGRIARETSVRFGGLSKVGDSGQRMKGKEMDYCNDSFATTTTA*
>comp49563_c0_seq7
MHRLSLGSPSTKLHGSSKEETLINDDEPKRRDDDDNNNDKAPKSQGLSLSDKFIHLIPLLTLLCFFILFLCSHTPSSSDLAQFGGGFKHLDSAAEIKDIGQYAEAKRGDVLAIRSLRSLQEIGKSRPHRKIADF*
>comp47259_c2_seq1
MKYEKIFSLINLKSHYHIDLKASAVQLVLKNSMFLSYSKQPGLVAPEVCDTRTR*
>comp55889_c0_seq1
PFSTESVPFVLAFPKIFAPHLILPQRINQSTINLKRKTKKRIRSKVRGS*
>comp55995_c0_seq10
MLKGMLWVNCLFLAYFPVFDYISLKLLQFFPFVP*
>comp16693_c0_seq1
MIETAGIKLKMKRKMQRRNFFTQPIVKVLESNIDTKEHRLQSNHVYWSSFPFLF*
>comp57702_c0_seq3
MASSACTKPVFPSTLTSTSSSHSSSKSSFVSFLNTTSLKVFHSQRPLVVNNVLKTVDPSQSSVLSSKSKDRESSSLGPKPTILVSEKLGDAGVEVLRGFGHVECAYDLSPEELCSRISSCDALIVRSGTKVTRQVFEASKGRLKVVGRAGVGIDNVDLQAATEFGCLVVNAPTANTIAAAEHGIALLAAMARNVAQADASMKAGKWQRNKYVGVSMVGKTLAVMGFGKVGSEVARRAKGLGMNVVAHDPYAPADRARAVGVDLVSFDEAISTADFISLHMPLTPTTNKIFNDDTFAKMKKGVRIINVARGGVIDEDALVKALDSGIVAQAALDVFTEEPPSKDSKLVQHENVTVTPHLGASTKEAQEGVAIEIAEAVVGALKGELSATAVNAPMVAPEVLSELAPYVVLAEKLGRLAVQLVGGGSGIKSVKVVYQSARDPDDLDTRLLRAMITKGIIEPISNSIINLVNADFTAKQKGLRISEERIFVDSSPEHPVNSIQVQISNVESKFASSISESGQISIEGKVKYGIPHLTCVGSFGVDVSLEGNLILCRQVDQPGMIGRVGNILAEHNVNVSFMSVGRTSRRKKAIMAIGVDEDPNKEALDKIGAVPAIEEFVFLKL*
>comp1030_c0_seq1
MCWTKLKLEIHNNKNHNDLKRTFVFKPSTSSKACHCWIERRNEYDDVTGNNQHYFSI*
>comp45781_c0_seq2
MPKEKSLIKSRMHSGKQNGVRKILVTFVIPTPVCVFVINLSEWTYVLISHFHAIKLCQTAYPVIFFCLRSISYVSAVSSKFIWCSWFACCKNEGGKLSMFYRVVCTQTAFRNIIFLFNIYLIL*
>comp46053_c0_seq4
MASISQGLVLTTAMVVSSTVLYLAFSRQKTTPPFQIHGNSDSQDPNKQILRSCLYSEEKKRERKTKQNKKKVHFADNVKEARESSEELMKEQRKQNIVSSNCRNETPEIRRMPANRIALYNGILRDRVHKMECSH*
>comp3502_c0_seq1
MAWVSVRVAQWSKGKKGCNCLLLNVISYFFAKSKHCYGCLFPSHQKVRLMPFSVVCSFFKISECTHTVFAIHKL*
>comp3049_c0_seq1
MIYIYIKDNGWEQMKSKYRFVHFCNITYIYMYIVLYIILFPCNYLKR*
>comp47620_c0_seq2
MAFKHDYPQFLVSSPPWVCIQLKYKNINQSPCHIKDITSFLVIIEQVLLLNYISK*TTYQRYNNVSVCI*HVLPMPCKMQNLRTIFLFNFRKNTKL*
>comp47300_c0_seq1
MATIILRSNKVVYALGLFCLLMLVHKGAAYEFVVGGQKGWSVPSDPKFNHLNQWAEKSRFQIGDSLVFNYQSGQDSVLHVKSEDYASCNTDSPLKKFSDGHTVFKLSQSGPYFFISGNKDNCLKNEKLSVVVLADRSNRNSSTNQTSIAPSPPPSPESSAPSPAGTVETNPTPAPVSEPPPPNAAASILVSLAGSVGTVMASLLILSL*
>comp4674_c0_seq1
MCILNYHGPCSIAFCLFLWAIINNLTIIHLSISFRQWTSIYLTHLCPKLSLKRQ*
>comp486517_c0_seq1
MGGLKSHCTVFWKLGLWLQMLQEDTMQPCFPFKHSDSSTSKLF*
>comp296603_c0_seq1
MCKFSGLLAPGVSTTIINTISFPAPLPGVLKFLFTYLQLTTTKQPLKLLSF*
>comp56191_c0_seq2
MMKGSKRLAVSEPNTADTNETTFRNKRIMEGSLFDVHRAEPSQQPMVATPPLDMKRAESSQQHVRALNTQFASWVQTQLKNHPDELWEDGVRDYLDHASSIMVKFSDVVNWLKANATKGENLPADAGASFAGKKLLPDVTNKTNNIFGEKTGSTPVSTTANFASSWSTGILSNSQNLFLFGNQSSAPSNHDASDDVDGENDVEQPSSPSVKKSEEKGVVVVHEVKCKLYVKSTDPAEKDVWKDKGMGQLSIKCKEGVSKATKDSKPTIIVRNEVGKILLNALLYPGIKTNLQKNSLVAIFHTSGNADGSGGDKDSVVACTFLIRMKTEEDRNKLASAIQEYAPVS*
>comp55715_c0_seq1
MQAVLQSVEYCGAVSESEMGLLTNRVERNEIKPGDHIYTYRAVFTYSHHGVFVGGSKVVHFRPERNLKSITETSSNLDDPTSSTCPTFPDCGFRQPNNGVVLSCLDCFLRNGSLYCFEYGVSSSVFLAKIRGGTCTTALSDPPETVIHRAMYLLQNGFGNYHVFQNNCEDFALYCKTGLLIVDKEGVGRSGQASSVIGAPLAAMLSSPLKLLMPSPVGVATVAAGMYCMSRYATDIGVRSDVIKVAVQDLAVNLGWTCPNEEVAEDEEASNSQITR*
>comp49286_c0_seq2
MAESKPGLRKPVFTKVEQLRPGTSGHTLTVKVVSTKMVMQKGRPDGPQPRQMRIAECLVGDETGMVIFTARNDQVDLMKEGSTVILRNAKIDMFKGSMRLAVDKWGRVEVTEPASFTVKEDNNLSLIEYELVNVVE*
>comp49941_c0_seq2
MGTCASSQYASKGGNLRWQSTVNIVHLDGRLQQLKEPMKAWHVLSQNPNCFICCSESMNVGSLMPPVAPREELQLDHIYLIVPLSKSRIPLSLQDLCALAIKANAALSHSKATNSISKFSSISQRNFLSHPTLPSVSLGYSH*
>comp50948_c0_seq1
MASAVDAAGNPVPSSAVLMASSKHIGMRCHEENVEFLKCKKKDQNPEKCLEKGQQVTRCVLGLLKDLHQKCTKEMDDYVGCMYYHTNEFDLCRKEQEAFEKKCSLE*
>comp50797_c0_seq1
MNRNSVHAVLNCDDILHEILLRLPPSTIFKFIIISKRWLRVICSSSFRRCYLSQWGHNFRLLGFFVCNFLYLGRPRDGYHRPAWEPALPFLSTCKEGDDLKLSGILKQLGYFIDCSNGIILSGRHPKTYYVYNTMTKQQCQLPEPQQFYKTLCMALIVEESLDDDDIWYKVIRAKCECKLKERNTVSIETFSSKTGKWKQSTLMCSSSFALRPRTVAMVVGGVVHWFAMWGKLAIYDPRLGDRHIALVKLPAGELSHEHDESVLGESSDGLLQYGQSNSLGLEIWMLEKEEGTNSSIYRNCTHLRYKWILRWRLNFKAIWKQNPSLSMHFKETQILSFLPQNSISIFIRSGWNIFLCDLKTKMVEIVNYQGRGASISWESSKVVPYFLPAWPLSFSVS*
>comp219863_c0_seq1
MVSMLDICYCLSSSVVIIIVNCRDKSQRSNRQSTMKLKWPAF*
>comp145109_c0_seq1
MLSEYGYLFNWIYTCKIKAFILKYNFFQLNVFLSYKCIFLCGPHFDVKQMGLSSKQI
>comp27005_c0_seq1
MVHLPLCLIYILSVETIAFFVGKEEKREVRL*
>comp280724_c0_seq1
MILKVCLSVVKLPLLIVNKIKDVLYLVKNSKVHTFVKVNVETDVVIE*FDL*ASLSEQYLALHLLPKILLCFT*IFLHCSILTAKAI*LYIKVGAAGLNNRNDIL*YYLVLL*IFR
>comp37578_c0_seq1
MWHNSSIMFDIMEFFFTILMILSVATPGLSSTTTFNVLQYGAAGDGQTNDSPAFLKAWKDVCQSKSHISRLIIPASRTFLLKPVTFNGPCKSNYTYIQLSGNIVAPKTKSEYSGFHTNTWLGFSFVNGLTISGRGTIDGRGSAWWSQPCLGNAPPGAKCRPPTALTLNRCYRFALKGLTHINPARSHITVTSCKLGVISNLRIIAPGTSPNTDGIDISGSRNIQVLNSFIATGDDCIAISAGSSLIKITGITCGPGHGISIGSLGTRGENDIVEDVHVENCTLTETLTGVRIKTWQGGAGFARRISFEKIKFVRANSPIIIDQFYCPNRVDCQNKTRAIKVSDVSYKGIVGTSLTDKAIDLSCDQNVGCSNIVFDRVYITSAVPGKKVLSFCNNAHGIASHTKPALKCLLK*
>comp436075_c0_seq1
MPVDGQIEYDRSCRLNL*
>comp128785_c0_seq1
MRNHFCNTKWSNANIMCKKRAEKFPLTTLVNVNEHKEITGKTPYSI*
>comp52756_c1_seq1
MNQEMNGVEAERLQENVHDKIDYVFKVVVIGDSAVGKTQILSRFAKNEFCFDSKSTIGVEFQTRTVTINGKVIKAQI
>comp37417_c0_seq1
ITLFTLKVGIAKRLLGAIIFTW*
>comp574039_c0_seq1
MSLSAAYRKGFNKGKINIKYQTHTRR*
>comp157706_c0_seq1
MPQALKSYIQSVTQVNTKTWQTVWVSCEGETPSDIEFIGPVHYLPQQGIPSYLLSGSENKGYLPPIIAVYLEAPARGVVINIECRAWVPSGTNDTKTVVASTKFQYLIDD*
>comp476696_c0_seq1
MSSQFSFIITYHAYYGVDNKYAIISISKTNKADKKYT*
>comp166463_c0_seq1
MHSTSTFVHQFSTLVNSAATSLSSFLGPYCHSLLLCHQLPLLGREQQKPNFI*
>comp144764_c0_seq1
RLALFLLVSILISNQFSYCLSFS*
>comp41902_c1_seq1
MGFLIAFAVKLPIIPLHTWLPDTHGEAHYSTCMLLAGILLKMGAYGLVRINMELLPHAHSIFSPWLMILGSIQIIYAALTSLGQRNLKKRIAYSSVSHMGFIIIGIGS
>comp41801_c0_seq1
MHAGNRCFSERPLKPADPDNWFEDVFCIATCQSAWSSSGRSELFISLRKFGIN*
>comp478382_c0_seq1
MVLHESMIQVKHNGILESMWWALASGNKAWLLHFCFMAWLESIWF*
>comp60118_c1_seq12
MGSCGKSTIVDDPSSGSAIEQHLCSELPVQSVPAQQSCSEEDCNVLDSNADLSNMTDGCMDSSREGRVGSASFVDVTKVSGDALASECENADMLLLDKTLEDDCQNRLGTCCGEIEVSGLKGDGLCTEENFQDEGNFDTPSEFVTVNSLQKHCVQQGEQKDDKSNIFPSAGDALAVVEGKNDDAGSCRLDFRPSELSLESEPMTDLLVDCNQKIEQEDIMRNADPLSKVVEKCDALDGMEADACKQISPSHREVPSDVLRTEVESRVDQLCDQKDGEERIKDFVDKESIIDTYVEVLSSSGCQRTLGSSPIVNSPFEPTILDQGNQINLEMKNNILQIEDNCCKLKDCSSEATTNCTFRKPFNPESGQPSVVLISDSSSKDVPDLLPKGDNGSINYNSAVDNHGLTDNEGKDVEVDCITESMLLPSKRNSRRTKSSRKTQTKKASRKCKNKASVTHPDGGMKIILEAARKKRSCFSKPARSSIWGLLGNIKQFFEQDNELGINKVMCQGLGKSRSSRKGGKAIKKGASSSSLNSVQKCSVSTTRVRLRIKVGKAVDLSCSNVLTPEVVDGLASASYLGSGSGSQEVVSNAEGKFSEVALGKFESFQNNLDKDALVLNGQFENNHLESTAIMKKSDGDAVELCLEVPPERVVEASTSIEPINNKGMDSGNSPDSEVINSIPEVLVGEGRQEDVHLAVLGSSEEFTSHLNVTGSKRGKKKDKLTCSSNCISQDGSQGPPRKNRAKHSKNHRRKKNFCDAVSTLELPTSTEINASSKSVSCKQLSTQPLPLSEEIELGDSTEALKVKSCLEVKTTCNLSVDHGFSESLDSENWLSSACKLPKSLKPSKVSKTKSKTSDSPSRKKPTCRRRGKQKKPISKSEVKGKGVSDKVMREVEDRSHTANDAVGNHKLDGVGKINAGGNRVSIDVSNLDMVPGAGFGDQHLSPRNAWVRCDDCHKWRRIPVVLADLIEETNCTWTCKDSSDKAFADCTIPQEKSNVEINAELGLSDASGEEDAYEDSINYKELDCRPPLVAQESTFTCIFNNEFLHRSCKTQTIDEIMVCHCKPPPEGKLGCGDECLNRMLNIECVQGTCPCGDHCSNQQFQKRKYTSLKWFKCGKKGYGLKALQDIAKGKFLIEYVGEVLDMHAYEARQREYALKGHRHFYFMTLNGSEVIDASAKGNLGRFINHSCDPNCRTEKWMVNGEICIGLFALRDIKQDEEVTFDYNYVRVFGAAAKKCYCASPHCRGYIGGGDPLNAEVIVQGDSDEEFPEPVMLTEDGEIEDSVHIPKYFDNVDTKSARHMLKGRDVLDKSITAIGADGTPEKESSMNPASLEVDDSKGKLPSSVRVEEISQQMEDVTSKPMPAVQQGYAMESELVDKTSSIQRLETIESNRESKSDIVEGRHGFSQSHLLVKTSRLNGSVKKGKVRANPPNGLKAEVTTNRLQVSSIKLKKVVEGSSNGRFEAVQEKLNELLDGDGGISKRKDATKGYLKLLLLTVASGDRSNGEAIQSNRDLSMILDALLKTKSRAVLNDIINKNGLQMLHNIMKQYRRDFKKIPILRKLLKVLEYLAACKILTFEHINGGPPCHGMESFRESMLSLTEHDDKQVHQIARSFRDRWIPRPVRKHGYMDRDDNRVESHRSFNCNRLSASHNHRHELDLRPTEAIDCVQQSMLVTTSIDAGAQVGCSALSLDEGEIKGTKKRKRKSRWDQPAETNSHSMPCPSKEQKIDNGLLKQTDAIIGSVDERQNIPEDVPPGFSCPLGSLNASLNSGDLALQNVCHSGCPSYAVIGHPKEKFNSRLPVSYGMPWSVAQQYGTPHTEITESWVTAPGMPFNPFPPLPPYPRDEKDCQPSNTTNALTIDQPAEVRQGDTSGLVNCYSDDMIPSTTGADPEDMNLSYEENQHISKRLKGASYDLGRRYFRQQKWNNLKIPRPWFRKNTLNSNGNNSRGDMCSVSVGNVPNESKVTCYSEDAICRAEKDGNNIY*
>comp114291_c0_seq1
MSVKLVVLNTVVNGGRGKESKLSTCVACHLYSVLLSLELFIWIYLKSGIL*
>comp30410_c0_seq1
MACLARNALLVARKSLPRCATQFSSMPDPIEHATGLEKRELLAKVAGNDNPFDLLVLKRGPGTKENPNQVPSAFDSRILGCVCEEDATAVNWMWLHQGAPKRCGCGHWFQLTYKAPV*
>comp46382_c0_seq1
MIPTVQPLSFLPTRMTLCSLKRNTNKHRSRRHREWQTQESNNTLSFPKPTPTPLLINHQPYTQTKFQALEQVLKDLEASVDKGIKIDPEIYASLLETCYRLQAIDFGIRVHRLIPTTLLRRNVGISSKLLRLYASCGYMDKAHDLFDQMAKRDVSAFPWNSLISGYAQVGLYDDAIALYFQMVEEGVEPDLFTFPRVLKACGGIGSVQVGEEVHRHVVRFGFANDGFVLNALVDMYSKCGDIVKARKVFDKIPHRDSVSWNSMLAAYVHHGLEVDAMNIFRQMLLEGYEPDSVSISKILTGVPSLDLGVQIHGWVIRRGVEWNLSIANSLIIVYSNHGKLDKACWMFNVMPERDVVSWNSIISAHCKRREALAYFEQMEEAGAEPDKITFVSILSACAYLGLVKDGERLFALMCEKYKIKPIMEHFGCMVNLCGRAGLIKEAYSIIVDRMDSEAGPTVWGALLYACFLHGNATIGEIAANKLFDLEPDNEHNFELLMRIYENAGRSEDVKRVRMMLIDRGLDY*
>comp53943_c1_seq1
MHIISLDLRRPVLIASNCSIVKLSTNCSHVKFFQHQKFNHFL*
>comp50193_c0_seq1
FAAIVHPIRKENSKRLNFEAITKKKSVLLIVPWGRR*
>comp204354_c0_seq1
MQQTHRTASIIAGIYTLFQALIYTIFTIYGCAIYTCLATFPFSVDSNHKASDLLYLAYFKGKCRALAGQPQVEALSATRTYYFLIVYGIVSAVWIPTSTLLVVASASRVKGRRGALLFYPWIVTTIVLTLLDVVGGVWYGLDITKTLTVNEFLAFLGGQVGPVPTGIDGIT
>comp50529_c0_seq1
MKITVMTAEEQILTLDVDPNESVENVKALLEVETRVPLQQQQLMFNGKEMNNFEKLSALGVKDEDLVMMVSGAAASGGSTNDLSLNADGSAVNPGAFQQHIRRDSTLMGQLFQTDPELAQVILGNDLNRLQQILRTRHQHRDELQRQKEEELALLYADPFDVEAQKKIEAAIHQKGIDENWAAALEHNPEAFARVVMLYVDMEVNGVPLKAFVDSGAQSTIISKSCAERCGLLRLLDQRYKGIAHGVGQSEILGRIHVAPIKIGNIFYHCSFLVLDAPNMEFLFGLDMLRKHQCIIDLKENVLRVGGGEVSVPFLQEKDIPSRFLDDEKYSKEASSSGAPVTSGSNNPSKGGQSSGASGDRSKESDFEAKVAKLVELGFGRDAIIQALQLFNGNEEQAAGFLFGG*
>comp298551_c0_seq1
MLGKKLLDLYVSELNEKGLKWYLMQSHHSSNVKTVLSNCYKCKVGMYVKYFTFSVSKNMVAMPISGVLPRLFMEL*
>comp178742_c0_seq1
MFWEIGLRLLREFYLD*WCENENPLFCLRNVKYHLCIMVKMKVFLCRKIEERSNRKIHFTTSVIPTPLLIIDSL*
>comp59731_c1_seq1
MQANWISSRRRLEKIFNPGSHMFNLKRKKKEKRPIRHKDMT*
>comp37822_c0_seq1
MHKDLAMSTRGLTCRMQTFQLLDFHIKEGFLKWRGEIFGFRSILDLKSTGKIKKFNNKDKQ*
>comp58474_c0_seq6
MANNVVDQDQHWLLNCLSATLDPNHDLRCFAEASLNQASLQPGFGSALSKVAANKELAVGLRQLAAVLLKQLVKKHWQEGEDSFEPPVVSSDEKEIIRRMLLLTLDDPHRKICTAIGMAVASIAVYDWPELWPDLLPFLLSLINNQTNLIGVHGAMRCLVLLSADLDDKMVPTLIPALFPSLLTIVSSPQIYETYIRTKALSIVYSCTSMLGTMSGVYKTETSSLIVPMLKQWMGQFSSILEIPVQSENPDDWSIRMEVLKCLNQFVQNFSSLIESEFEVILGPLWNTFISSLRVYEQASIEGTEDSYDGRYDSDGAEKSLDSFVIQLFELLLTIVGNTRLGKVVVANVKELVYYTISFLQMTEQQVHTWSADANQFIADEEDATYSCRISGLLLLEEVVNSFGGEGFLAIIDAAKQWFSESQRRKVAGSASWWRIREATIFALSSLSEQLFETEESGFETSSLQQLVEQIITEDSLIGPLEYPFLYARIFTSVAKFSSVISSGVLEHFLYAAMKAITMDVPPPVKVGACRALSQLLPDAKNEIVQQQMLGLFSSLTDLLNQASDETLHMVLETLHAAIKAGHESSALVEPVISPVILNVWALHVSDPFISIDALEVLEAIKSVPGCMHPLVSRILPHIGPILNKPQEQADGLVAGSLDLVTMLLKNAPGDVVKAIYDVCFDAAIRIILQSDDHSEIQNATECLAAFISGGRQEVLAWGSDSGSTMRSLLDIASRLLDPNLESSGSLFVGSYILQLILHLPSQMAVHIRDLVAALVRRMQSAQIAALRSSLLVVFARLVHMSVPNVGQFVDLLISIPAEDHDNSFAYVMSEWTKQQGEIQGAYQIKVTTSALALLLNSRHKELAKTRVQGHLIKSGVGITTRSKAKLTPDQWVMLPLPTKIVALLADALIEIQEQVLAGDDEDSDWEEVQADGIENDREFLYSVSTSATGKPTYEHLEAMAKVFNEVWLSFNYYPLSKFLFYAIISCHIFKLLYFFYFYIAELASKLQGSRGSV*
>comp8878_c0_seq1
MTVAYMILIQHQFCGKTRHEMKCNRDCCLRKAGRHHNNPNKLCLCFHLLLFYLYCYLPLFESHNGFLSMQFYFKHMFIYLLIILKGTISWFN
>comp46101_c0_seq2
MCLSVNPLYIYPLEFNTEHVIKGVKVTLLEANHCPGAALIHFDLPNGQCYLHTGDFRACKQMQALLVNQHVNVLYLDTTYCNPKYKFPSKENVLNYVVKITKNHLKMQPRTLVVVGAYSIGKECVYLAISKALEVKIYANASRRRILLAFGWPELRDSLCTNGNSTLLHVLPMSSLRFETLKDYLKTYKEQFTSILAFRPTGWTFSEKIRNDLELIKPVSRGNITIYGVPYSEHSSFTELRDFVQFLRPDKIVPTVNVGNAANREKMQSYFRDWLKG*
>comp246231_c0_seq1
MRGPKEKILYVICIRPNGKENGLPDYLSTVDVDPSSPTYSQIIHRTFATHTGDELHHMGWNTCSSCHGEPDKTRNRLILPGLNSDRIYILSTEDERAPKIHKVIEPEEVHAQNVSFPHTTHCLPSGEVMISTLGDAEGDNKGDFLLIDSKTWTVTGTWTKG
>comp185685_c0_seq1
MKKEGSEKTIACSIVETKFRLHRFINQDRSHVESDMIYDVRDIISRNTGDSKYIHCVTKFKPSDLARKNANLPENHSVRLAICFGLISTTLGNPVLVRKNTRICEDCHVAVKRISEITKREIIVGDSKVFHHFRDGHCSCGDYW*
>comp54293_c1_seq3
MSDMAAGSASRQPAVDPDRKEDSKKSKAKNETTNTVPLYKLFSFADPLDHLLMFVGTMGAIGNGIAMPLMTLIFGNMIDAFGGTTNSKDVVHEVSKVALKFVYLAAGSFIASLLQVSCWMVTGERQTARIRGLYLQTILRQDVSFFDKETKTGEVVGRMSGDTVLIQDAMGEKVGQFIQLVATFLGGFVIAFTRGWLLTVVMLSCIPLVVFSGAITSMIIARASSRGQAAYSAAASVVEQTIGSIRTVASFTGEKQAIAKYNQSLIEAYKTGVQEALASGLGFGSLFFVIISTYGLAVWFGGKMVVDKGYTGGEVVTVIFAVLTGSMSLGQASPSLSAFAAGQAAAFKMFETIKRNPEIDAYDTTGRQLDDIRGDIELREVCFSYPTRPDELIFNGFSLSIPSGTTAALVGQSGSGKSTVVSLIERFYDPQAGEVLIDGINLREFQLKWIRQKIGLVSQEPVLFTCSIKENIAYGKDGATDEEIRAAAELANASKFIDKFPHGLDTMVGEHGTQLSGGQKQRIAIA
>comp23612_c0_seq1
MGNFDCLNFPKKKGGGIYCFLFNLIILKCLFCLD
>comp1309_c0_seq1
MRFAKFLTFSSLLSSLNLMVFDELIAKSVAHCFFVWLGFTSLSGSTW*
>comp50014_c0_seq1
MLSDDVSSVLVCLFCLVEFVDDVCGSICVYKKEVLEFLVISGSNLLAAFADLMVLC*
>comp17875_c0_seq1
MTQLKFVIITHNLFALATWVRVIRLSVSTMDCLQVASTQGQTVVSSPRPC*
>comp20942_c0_seq1
MLITSELHETLHRRYEILYKITHHEMHFIIKCWGNYIALP*
>comp57683_c3_seq1
MHNFTGDIYLILKCQISRCKISKYTELLLIISPPLLSLLVCMFILIYSRNKLSKSTDYHS*
>comp53424_c0_seq1
MYMPVGSQNSSKPSSHCHHFRYFLIGSLSISFFSLSLMSSERESCNSRHFTWLVKSCFPNPHDTISTTKPSSQTHPHPTPSALATTISTLPDDIVLDCLSRVPPSSLPSLSLVCRHWSRLLHSPDFSDLRRRRSLLRHTAVAVTTTDSGFIAATLSDGAWKTSPFLPCNDAVSLDSFHSLLSHARVASIGPRIFVVGRNAMVRYDTWTGTVTPRSPMIFPRKKFAAAVVAGKIYVAGGGSKTAAVEEYDPNTDTWRVVSHAPRRRYGCVGASVDGVFYIIGGIRIGASAERNEFSRAAGGAEAHAAYASSMDLFDVEACVWLRSRAVPGGGCVVAACAAAGRVYALTSHAVELSFWSFDARRKCSSRSGGDGSGAFGEWCRIKGPPLPAQVRVDTRMRFSCVGMGDKVVLIQVAGCLDGLLGRGGRSMRGSREGFVLVYDCAAGEWRRGADLPVDFRRAAYVGVEC*
>comp8160_c0_seq2
MLQIKLQQTDVLNLHGYNFFIKQTLKKLNDHTL*
>comp45906_c0_seq3
MIFKTVIDILYSCILAYCGTNYDNVLFWQ*
>comp304923_c0_seq1
MRDVEQAVSNLHQPTGPFALGNSGFLSQECTLERQALYSHLVRSYKWTDKIHEYSSLAAQLLGQNQLKRSYIVAGSNKRRRIQTSCHNVPIQAVDQVIAGIDRQ
>comp262030_c0_seq1
MKTAQTSAKEKTLQNIERRMFTLSSHNNQHKGYSLHLTPLCIQITPLIPCQQTSKQCKCVKLSKPLLSLVLFVFL*
>comp26539_c0_seq1
MKHNKLTRLTSRLEKKPLVSLFFAKIQPHIKTNTLKTTLKVSGGISTKRT*
>comp166792_c0_seq1
MQQKAIFSISCFDCINRSTLQVRALIPVKKCSM
>comp281067_c0_seq1
MKLHQTLGKNKEALNNKSCGLHLGPFKFQHFNLTKEGTHFYKILLNHHFVEIEKEIKRRMKKNEPRTNRSQLSCISSIHFDSSAEN*
>comp50357_c0_seq2
MHKILALLMHTECSVRPPITRVYFRRNKPSHRGYNPCVHTVSEQGSMSQQGEGNHESHMWQGKSQQETNSVTKGEREEMGRAFS*
>comp58601_c3_seq1
HTHTHTQVFPELPKKHRDREEYQQRHNPETNILANRFSRQLQKTRPYIYHSQGILQGNC*
>comp8348_c0_seq1
MVRVRNKQVKMRHRSAHSQQPQPPPSISHDNPSRKSKKKHNHNKNSPENKLIEKEGRSYANGYEVNGQIPHAVVCEEEIVAVAPEESTESVGELRHTSVNGATFQDSVEKPSGSSSVAKSETDENSNLEKSPVTYFLEEVYNGNSLRSTTTPGNEKGR
>comp51430_c0_seq4
MGSIGFESSGAEVVTVDVLATKGLIQTGHVYLDVRTVEEFQKGHVDADKIINIPYMFNTPEGRVKNPEFLKQVSSACNKEDHLIVGCQSGVRSVYATADLLAEGFKDVNNMGGGYLDWVKNEFPVKAPVAKEEL*
>comp47230_c0_seq1
MKEPAVLLLLSLAAFTSSLPLSGLFGYPAIELEGGFDESTGVKGASGVLELQSGPLSMIAGRDSSGSLAGGVGVYQTGQINLGNFGKLSVKGTTTLDGKYTAVVDTEVFNGPRSFNPMTVSLTRKPNGVDFIGTSDLGWVSGTYSTSTQSNVIPKFEVHLNTNGWITAVANGRIKDRQIEMLSYNAGFNTGPFSAAVNMDGDRNVTDYEVGASLGLIHGTMKIDRTKSNQRSYKAGVSLGIVSFDTEINADSTRVYNAELDTGILRYSYNIDKDDSTNWKGSVDLANIGIDYERTKEGLTIAGGRIQLGTSVINIHRDSTGHYTVKVNQGSIVE*
>comp33966_c0_seq1
MTAQNVLEAIKQKYQSQCPNTAMPEFHVFFNDQPSNDFNTLFSSLPQDRQYFAAGVPGSFYDRLFPESSLHFAYTTYALHFLSQSPEEMQDKNCSAWNKGRIHYTSASKEVVDAYAAQFAKDAGNFLDARAKELVPGGMLVIVMQGIPDGMPHSDIINGMMYDYMGSILKEMAKERLFDESQVDSFNLPYYAPSPEEMTKLIEGNGHFKIERMELTNPAPWLKSTGQVIPEWIT
>comp60139_c0_seq1
MSLFKS*GAK*F*IKLQGLKLYIKLIPEFFTFIFKGTPIFYGSARLDTSWVCRLKLFVKSKHRVQ*VALFLFLKP*MNTWISLWI*
>comp246561_c0_seq1
MIINKTTISRLMILYTISFHKLLISIWMHLNSVDSLNQFYVKFRCSHINSLCRVCGTVLCE*
>comp54644_c0_seq1
MDIRFPFSPAEVAKVRMVQFGILSPDEIRQMSVVQIEHGETTERGKPKVGGLSDPRLGTIDRKMKCETCTANMAECPGHFGHLELAKPMFHIGFLKTVLTIMRSVCFNCSKILADEEDHKFKQALRIRNPKNRLKKILDACKNKTKCDGGDEIDIHGQDSEETVKKSRGGCGAQQPKITIEGMKMIAEYKAQRKKSDDQEQVPEPVERKQTLTAERVLSVLKRISDEDCQLLGLNPKYARPDWMILQVLPIPPPPVRPSVMMDTSSRSEDDLTHQLAMIIRHNENLRRQERNGSPAHIISEFAQLLQFHIATYFDNELPGLPRATQRSGRPIKSICSRLKAKEGRIRGNLMGKRVDFSARTVITPDPTINIDELGVPWSIALNLTYPETVTPYNIERLKELVEYGPHPPPGKTGAKYIIRDDGQRLDLRYLKKSSDHHLELGYKVERHLNDGDFVLFNRQPSLHKMSIMGHRIKIMPYSTFRLNLSVTSPYNADFDGDEMNMHVPQSFETRAEVLELMMVPKCIVSPQSNRPVMGIVQDTLLGCRKITKRDTFISKDVFMNILMWWEDFDGKVPAPAILKPEPLWTGKQVFNLIIPKQINLIRQSSWHNESEKGTITPGDTVVRIEKGELLTGTLCKKTLGTSTGSLIHVIWEEVGPDAARKFLGHTQWLVNYWLLQNAFSIGIGDTIADAATMETINQTIAKAKEDVKKLIREAQEKKLEAEPGRTMMDSFENKVNQTLNKARDDAGNSAQKSLSESNNLKAMVTAGSKGSFINISQMTACVGQQNVEGKRIPYGFIDRTLPHFTKDDYGPESRGFVENSYLRGLTPQEFFFHAMGGREGLIDTAVKTSETGYIQRRLVKAMEDIMVKYDGTVRNSLGDVIQFLYGEDGMDSVWIETQKLDSLKMKKSEFDRVFRYEFDDENWKPSYMLEEPVEDLKTIREFRNVFEAEVQKLEADRFQLATEIATTGDSSLPLPVNLKRLIWNAQKTFKVDFRRPSDMHPMEIVEAIDKLQERLKVVPGEDLLSQEAQKNATLLFNILLRSTFASKRVLEEYRLSREAFEWVVGEIESRFLQSLVASGEMIGCVAAQSIGEPATQMTLNTFHYAGVSAKNVTLGVPRLREIINVAKRIKTPSLSVYLKPEVSKTKERAKNVQCALEYTTLRSVTQATEVWYDPDPTSTIIEEDVDFVKSYYEMPDEEVAPEKISPWLLRIELNREMMVDKKLSMADIAEKINLEFDDDLTCIFNDDNAEKLILRIRIMNDEAPKGEIQDESAEDDVFLKKIESNMLTEMTLRGIPDINKVFIKNTKVQKFDESEGFKPHDEWMLDTEGVNLLAVMCHEDVDARRTTSNHLIEVIEILGIEAVRRSLLDELRVVISFDGSYVNYRHLAILCDTMTYRGHLMAITRHGINRNDTGPMMRCSFEETVDILLDAAVYAETDHLRGVTENIMLGQLAPIGTGECALYLNDEMLKNAIELQLPSYMDGLDFGMTPARSPVSGTPYHEGLMSPSYLLSPNLRLSPTTDAQFSPYVGGMAFSPTLSPGYSPSSPGYSPSSPGYSPTSPGYSPTSPGYSPTSPGYSPTSPTYSPSSPGYSPTSPAYSPTSPSYSPTSPSYSPTSPSYSPTSPSYSPTSPSYSPTSPSYSPTSPSYSPTSPAYSPTSPAYSPTSPSYSPTSPSYSPTSPSYSPTSPSYSPTSPSYSPTSPAYSPTSPGYSPTSPSYSPTSPSYSPTSPSYNPQSAKYSPSLAYSPSSPRLSPSSPYSPTSPNYSPTSPSYSPTSPSYSPSSPTYSPSSPYNSGVSPDYSPSSPQFSPSTGYSPSQPGYSPSSTSQYTPQTSDKDDRGTR*
>comp19922_c0_seq1
MRFDEIWESLSNRLTSLFSLEKHSLPLLELNRPNLQNVHQGYV
>comp55088_c0_seq1
MQRFAESVGWKMQKRDEDLVHDFCNEVGVDRGVLKVWMHNNKNTLAKRDANDGGNRSILEEEPNITHNTEINGNDNENNQNDSAEDPSHYQNDSGANVVANGSSSS*
>comp37496_c0_seq1
MPMNIFFTEDGQMDKRVFLATWKDIPAQNEVNYTLTNVQGNADTIVQKMQQNNVFTIAKRNVEGQDMLYQSVKLTNAIWVLNELKIQPGNPNITLSLKSRAVDIAAGMFQAYDSILHS*
>comp356667_c0_seq1
MALVLAPTRELASQIYDEAVKFSYRSVVKPVVVYGGANPMHQMEEIRQGCHILVATPGRLVDMMERG
>comp128973_c0_seq1
MKNSQRTGVRQYNKSELPRLRWTSELHEHFVEAVEGLGGKDKATPKQILQHMRVKGLRIAHVKSHLQMYRNVKGHAILAPVDQLLEGNAHINNFKICSICSPKRSLGTTLRVSKYEGRILKQELHLLDNKELSQTSEETDYDLNQEPESSACLLSEVSNEKENSRIIKFPDLSFSFSTPLIPTMHNEIGQEIMHFSSSTAADNHTVDSSSIQSTGSNYINL
>comp44769_c0_seq1
MAKSMVALNPPKTLHTKVVPMNPTVPLFSRSTITFKPNKFPAISAAATRRGEAEQKLSLGDALLNGNRKDQVLDAIRNSSPSNCLSETNLHLTVPGLKSKTRGKVRDIYDSGDYLVLVTTDRQSAFDRILASIPFKGQVLNETSLWWFEKTKHITSNAVVSAPDKNVTIAKKCSVFPVEFVARGFVTGSTDTSLWTVYNKGIRNYCGNVLPDGLVKNQKLPENILTPTTKATDHDVPVTSDEIIERGLMTEADFEEASRKALSLFEYGQHVASEHGLILVDTKYEFGKANDGSIMLIDEVHTPDSSRYWIANSYMERFQNGLEPENVDKEFLRLWFKSHCNPYEDEVLPDAPEDLVCELAWRYIFLYETITKSKFEVLLSEEPIHDRISRNVASALSSLK*
>comp55085_c0_seq30
MVWKTIKLAIVDCIDHKMIEEVKLTLCTSPRIHCKKVTNLITFSCHTTNKTFGKTSQMNVIHPIKTEI*
>comp55300_c1_seq2
MNMKGSPKGSWQPIMTADTSTQSYWLNWWVLLCAIWVLVSIIFSSLLIWKYERSRNGSRETQQETSATLYEDETWRPCLKGIHPAWLLAFRVVAFIVLLVLLIVNAAVDGGSIFYYYTQWTFTSITIYFGLGSSFSMYGCYQHHKKATGDKVDNVDGDAEQGIYDAPALPQSSNASFHEKSLGAPEEHLVRQPAGTWGYIFQIIFQMNAGAVMLTDCVFWFIIVPFLTIKDYNLNFLMVNMHTINAVFLLVDTALNCLRFPWFRIGYFCLWTVTYVIFQWIVHACINLWWPYPFLDLSSPYAPLWYFSVALLHIPCYGIFALIMKLKHFVLSTRYPDSYQCVR*
>comp52644_c0_seq3
MEMEALTGLSHLFVTMFLTGLAGFIVLPAITDVTMAALCPGQDQCSLAIYLTGFQQAMTGVGAVVMTPLIGNLSDRYGRKAMLTLPLTVSVIPLVILAYSRDAHFFYAYYWAKTFAAMVGEGCVHCLALAYVADKVPDGKRASAFGILAGVGSASFVGGTLAARFLSTALTFQVAAVLSMIAAVYMRIFLEESVPGGGERQPLLKEDEEPYVEPCENDSSRRTTGTFKRLPSLGDLICLLKCSPTFSQAAVVLFFNSLADGGLMASLLYYLKARFQFNKNQFADLLLITGIGATLAQLLFMPVLLPAMGEEKLLSTGLLVSCISIFVYSISWSPWIPYALAGCSIFGVFVRPSICSIASKQVGPTEQGMVQGCLSGISSFANIISPFIFSPLTALFLSEDAPFYFPGFSLMCLGLALMVAFIQSIMIRADSSKADGKISSNPCRDALV*
>comp386699_c0_seq1
MPPQDINLSDVGSILVSCEPYLVGIQQVLLGFKPSFLHPSGHDMR*
>comp33951_c0_seq1
GNCRLKRKQKKKWGERERDTVSPRCLKVKLQENPKKIHVYLYKCGQKVYGQKNVWATYYEGLDNNWKKNKQPKL*
>comp105973_c0_seq1
MVLKKGECHLFRCRYRYCCCWCWCWNLMVQTTMEFESLVFEKGEFSGFFEVHNVVKDGKEGKGRKWEYKEESEREEDDHIHGLLVDKGNTYMSVL*
>comp54821_c0_seq2
MHTLLICLQTALQDQCPVMAGLLLQLDLLVEPRKMSIYREEAIDMLISCLRNTDFPAAQLVAAETIVSLQGRFNFSGKPLTREVLLKRAGLDKSSRSLVQVDQISNFGTEIEITPEEEKAADDWERKIASVLVSHEFGLLFEALTDGLKSQNPELRSACFISATWLIYMLTILPDTGIQGAARVCLLKQFITKLKSAKDIEDRILAMLALNSFLHFPDGLRDLTSYTKDILKGLRELKRSSPMASKMLKVLVEENESKADIWIHKELIQVDCSENGEVLSVICSKNKIFSGHSDGTIKVWTVKDILFHLLQETQGHIKAVTSLAISESGDRLYSGSLDRTAKVWSIGNAAIHCVQVHDMKDQIHNLVVTNSICCFIPQGTGVKVQSWNGESKLLNSNKYVKCLAHVHGRLYCGCHDSSVQEIHLATGTVSTIQSGSKKLLGKANPIHALQTHGELIYAASSSLDGSAIKIWNNSNYSMVGSLQTELEVRAMAVSSELIYLGCKGGAVEIWDKKKRNRVDTLQTGTNCKVLCMAPDSNEEILVIGTSDGQIQAWGMN*
>comp361092_c0_seq1
MQATRCTLDYLPHFREFSPVEGCLDNLKDWPSIFTDEVVGHFMIKAGFSHTVPHVLRICGMATQKFVADITESAKQYS
>comp55602_c0_seq2
MAAPEAVRQVIFGAFPRLCPIDTCFYDIYSVRSNKFNVCNRRGKISVNVRAQGSSRVFHASKRMYVLRNTDKASHGKIAFDQLESIMCNCQLGESVSDITTEDQDSTWSKMDKRPTTGSLNGSVTDSTQHGEAIGVDGLVKHENGGFTSKDKSPIDGLIKDPLHKVSEKTIEDEAWNLLRDSMVYYCNNPIGTIAANDPSCSSILNYDQVFIRDFIPSGIAFLLKGEYDIVRNFILHTLQLQSWEKTMDCHSPGQGLMPASFKVRTIPLDGDDSATEDVLDPDFGEAAIGRVAPVDSGLWWIILLRAYGKCSGDLSVQERVDVQTGIRMILKLCLADGFDMFPTLLVTDGSCMIDRRMGIHGHPLEIQALFYSALLCAREMLTPEDGSADLIRALNNRLVALSFHIREYYWIDMRKLNEIYRYNTEEYSYDAVNKFNIYPDQIPSWLVEFMPSKGGYLIGNLQPAHMDFRFFSLGNLWSIVSSLATADQSHAILDLIEAKWAELVADMPFKICYPALDGQEWRIITGSDPKNTPWSYHNAGSWPTLLWQLTVACIKMNRPDIALKAVQIAERRISKDKWPEYYDTKRARFIGKQARLFQTWSIAGYLVAKLLLANPNAAKILVIEEDSELINAFSCMISANPRRKRGRKKHSFLV*
>comp47805_c0_seq3
MEAESCDAVHPRPQVKATLRLGTESYSVQANKGSLSEQLVSLKGESMIILKDFITKHNVPHDVPDELLEASSEDDGDIPEKPQVKPKKTKLT*
>comp59435_c1_seq9
MAESVELPSRLAILPFRNKVLLPGAIIRIRCTSPSSVKLVEQELWQREEKGLIGILPVRDAAEIKPVGPTVSQGVGIDSLDQSSKTQGGSSDSHKLDAKKQNDVVHWHTRGVAARALHLSRGVEKPSGRVTYTVVLEGLCRFSVQELSTRGTYHIARISSLEMTKTEMEQVDQDPDFIMLSRQFKATAMELISVLEQKQKTGGRTKVLLETVPVHKLADIFVASFEISFEEQLSMLDSVNPKVRLSKATELVDRHLQSIRVAEKITQKVEGQLSKSQKEFLLRQQMRAIKEELGDIDDDEDDLAALERKMQSAGMPQNIWKHAHRELRRLKKMQPQQPGYNSSRVYLELLADLPWQNASEELELDLRAAQERLDSDHYGLAKVKQRIIEYLAVRKLKPDARGPVLCFVGPPGVGKTSLASSIAAALGRKFVRISLGGVKDEADIRGHRRTYVGSMPGRLIDGLKRVAVCNPVMLLDEVDKTGSDVRGDPASALLEVLDPEQNKTFNDHYLNVPFDLSKVVFVATANRVQPIPPPLLDRMEVIELPGYTAEEKLQIAMQHLIPRVLDQHGLSSEFLQIPEGMVKLVIQRYTREAGVRNLERNLASLARAAAVRVVEQEQVVPLNKGMQGLSTPLLENRLADGAEVEMEVIPMGVNSRDISNTFRIASPLVVDEAMLEKVLGPPRFDGRETAERVATPGVSVGLVWTAFGGEVQFVEATAMAGKGELHLTGQLGDVIKESAQIALTWVRARATDLRLAASEGVNLLEGRDVHIHFPAGAVPKDGPSAGVTLVTALVSLFNQKRVRSDTAMTGEMTLRGLVLPVGGVKDKILAAHRYGIKRVILPERNLKDLVEVPSSVLANLEILLAKRMEDVLEHAFDGGCPRRQHSKL*
>comp51734_c0_seq1
MAMAMQSGIGISKILIIAGAGYTGTVLIKNGKLSDLLGEIQLLVKGLEKSGDQAEGEGEYADAIAAQVRRLANEVRQLTSSKSITIMNGGSGQSNLSSLVVPAAALGALGYGYMWWKGFSFSDLMYVTKRSMEKAVSDLTKKLQHASDVIADAKKHLTQRIQNLDDKMLKQNELARSIKDEVAGVRSTITNFHDDLGILQQTVETLDERLSTLSWKQDYANHGLAYLIDFVHGKTRKMPEFLQEQPKLSGKSPGLLTYPGAPNLKGLKDIAETLSTGLDRSASDAILPDGMTKLEQQRRPLLRTTSTRC*
>comp43136_c0_seq1
MANSVEIEKKAKEAFFDDDFALAVDLYSQAIHFDPKNADLFADRAQAHIKLNTFTEAVSDTNKAIQLNPSLAKAYLRKGTACMKLEEYHTAKVALQIGASFAQNDSRFPKLIKECDHYIAEESNGLTSTLSPNGPITTVSSGDGAGTTKEAERDSSVSQINEVTSIRPKYRHEYYQKPEEVVVTIFAKGIPAKNVAVDFGEQILSVTIDVPGQDIYHYQPRLFGKIIPDKCRVEVLSTKVEIRLAKAEAINWTSLEYSKDMLPQKINMLTIQSERPAYPSSKPRTRDWDKLEAQVKKEEKEEK
>comp187123_c0_seq1
MLVQLTTNISVFNSVIEPCYILSGFDEAVITR*
>comp101674_c0_seq1
MLACECKCKSYSYPFFKVIFPFSCPSVNHKKVPVKKQNRLANVGGDPLFSISTEQRKKQNKIHKPIAGTNILLRYPAAW*
>comp43796_c2_seq1
MIKYYIVFNSSFAKGVTGTQSGLLVLVLAFRHWIGQLKRISDAKL*
>comp172242_c0_seq1
MKPSMKLLKLSHVLEVKLFKQEKCLGLKN*
>comp309021_c0_seq1
MVPQASLQKEGIFFGNHDINLLAGSEGHKRVLQIPSICSYFHHESESLMHLLVEYPRAAEVWNLVLLSPARSFTWSIIILLGMVEMGSKVVLFHHDAKRDPPWLPL*
>comp59384_c1_seq1
MPFFFYVFSLLGFLILLYFLALPFFVSTSCCTASCMGLAEISQLLSTIGKVYALACEAVLWVCVDNIKPKHNLGLDCDAIEF*
>comp47588_c1_seq1
FLFDDRFVEEEITLAQTSNTKEKGNQERKGNGPTKNQTAYRLLSFELGCRPIRHPHFLLLLLCLKSCNFVTIRLSHSFSEFASSHPKP*
>comp38558_c0_seq1
MDNSEDFIAKGKPMILNPYYTNKVDMISTTLTLAADYACSFISGASRVQRYVWGANQTSTSATVWRCLTYFNKN*
>comp41031_c0_seq2
MAKGYNQQYGLDYDETFSAVVKMNTMRMALAMANHCHWKLHLLDLKGTMNGGVAIC
>comp287963_c0_seq1
MEKLIQMMKYLETAQTTSTGLLHICWDGDENENFLSFWIKNFRVCLVRKGGMEI*
>comp358569_c0_seq1
MKFVWHRLLYLQVSLEHYRKESWILQKLLAFWRQTDRSFRTRRYQQWIP*
>comp52473_c1_seq2
MLQAVHVVANNVSGCGMPEGRCLPCSGVSGRTAAVYSCSSQGLQRIHSHVKIRRLKCASVGASFVCEARRNPDFSRQNKHGFSRNRNWHNEGRDSFENFEEDMLSSKNGQLISLSSTPKSQATAAPGPREKEIVELFRKVQARLRERAAIKGEKKVEASQGQGKENGTVDSLLKLLRKHSVEQVKRSSGGGRRKDFNLDQLQDSSQYNGGRSTKFSDLDSAPKNESQEPNISSIARPTSNFQRRSPVPRLKYQPVTYDENAVPLSSGVREKDQDQIGLKLDLEPEPDSEPELDPKDELFLPDVGIADLSEDDSEQIFNDVHGEEQQVVQHEDLSALKLTELRALAKSRGLKGFSKMKKSELMELLTGR*
>comp187519_c0_seq1
MFP*SFCNLTETKQQ*ISTKKLQQA*QRYYDFCPEQKKCVIKKLSLSSTPQYSYLPAKESTGKSIGEKVHIVHIII*ITQTMEGTKYPT*
>comp20798_c0_seq2
MTSIYQFKFKYFFFKTKFDSR*VGLGQILNRLDNFVNFKGQINCMENFA*
>comp55730_c0_seq1
MSIQVMHQTNESCLDSVSNFIHSVFSVLILFPYKQLWHTANKLPQASFKSLSYSNQKQISLFQCICYIIYSQISICLYI*
>comp2510_c0_seq1
MHAVIYNLKIMYSFRRLASKATANHLVKEIYLHGKQRTNIREHVEENNLFSQRYSPQNLDKVSAF*
>comp54336_c0_seq8
MKRMIGLGFEGSANKIGVGVVTLDGTILSNPRHTYITPPGQGFLPRETAQHHLQHILPLVKSALETALITPQEIDCLCYTKGPGMGAPLQVAAVVVRVLSQLWKKPIVAVNHCVAHIEMGRVVTGADDPVVLYVSGGNTQVIAYSEGRYRIFGETIDIAVGNCLDRFARVLTLSNDPSPGYNIEQLAKKGEKFIDLPYVVKGMDVSFSGILSYIEATAVEKLKNNECTPADLCYSLQETLFAMLVEITERAMAHCDKKDVLIVGGVGCNERLQEMMRIMCSERGGRLFATDDRYCIDNGAMIAYTGLLEFAHGASTSLEDSTFTQRFRTDEVKAIWREAELEKLNDLAEKSI*
>comp105827_c0_seq1
MFKLQSIPPLSCG*FLSSICCEYLQLQVHNEL*IFNT*NTHTPAHKSTSISAHDFLPLQNVNFVEEV*SAGWRATVEQSIKQDHLNEQDAENLIDEHNPIKWIF*GHKY*NQYIKL*SFISVHVSVQTKIPHVASAITFLTGLLPYLPDILLILII*ILAVGSSAYH*AESYS*WQWCNFISL*FLR
>comp46682_c1_seq1
MGKYDQQYLHQQQSHEAQHPRSSGILCQGCSSVLRRFANEFSFKCLFVLILSLSVLLSGVLWLVPRYTIKRGFDAKDAIKISG*
>comp47478_c0_seq3
MPPKLDPSQVVDVYVRVTGGEVGAASSLAPKIGPLGLSPKKIGEDIAKETAKDWKGLRVTVKLTVQNRQAKVSVVPSAAALVIKALKEPERDRKKTKNIKHNGNISLDDVIEIARVMSPRSMAKDLSGTVKEILGTCVSVGCTVDGKDPKDLQQEITDGDVEIPQD*
>comp276507_c0_seq1
MNYQLPKSFKKLGITYCIPSHPQYLVSSDELEYNRIIFNLMKTKFSRENTRFLSISIQS*
>comp46756_c0_seq1
MGTNGYQFNIWGLVASQYFSLMRYMTKEHDWAIIYGLKFKLTRQLKKGLKILLAMYYELDLDTICMLYMMSAF*
>comp57757_c0_seq3
MLKLMVSSASRLCREVHRSISSENNAVNQLKEVVHGDRRLVFNNAAMNHLEMFNMVNAHHASTGYKCLKLKWRKFGHLAGQVGGAKSIFCGLFGHEAENTFWLDSSSTEKGRARFSFMGGKGGSLWKQLTFRLSDQSDGSSKGGGYLSMEDCQGSAKTIFLEEGFLDFLDKELQSFRYDEKDFEGLPFDFPGGYVGYIGYNLKVECGVTSNRHKSKTPDACFFFADNLVAIDHKNDDVYLMAIHEGSSSMTQWLDDAEEKLLSLKGSVAMELERQHSHTLTFSSCKAGFAAEKSREQYIEDVKKCLNYIKDGESYELCLTTQIRKPIEELNPLGLYLHLREKNPAPYAAWLNFSKENLCICCSSPERFLQLDRNDRLEAKPIKGTIARGATEEEDEQLKLKLQLSEKDQAENLMIVDLLRNDLGRVCDPGSVHVPRLMDVESYATVHTMVSTIRGKKRSDVSAVDCVKAAFPGGSMTGAPKLRSMELLDSLESCSRGIYSGCIGFFSYNQTFDLNIVIRTVIIHEGEASIGAGGAIVALSNPEDEYEEMILKTKAPAKALTHFE*
>comp42857_c0_seq1
MEIPPPPSFRPKVQQSSHTFPPTLLELVRPPSRYYGKHVREPRVHRNLKLLPATILCKLIKRNENL*
>comp21110_c0_seq1
MSTHFGSYEANRPGFEKLYRVLSDQAWERSFDLIKHMTKRGGKMNFNYREADNLAEPSEKKKEVYELHELASLARALDIQKSLAEEAFHLHHSVSGKDPKHHDPELSQYLEEEFI
>comp56969_c0_seq2
MYQNLSFGGDKVLNPVVTATKLHMLSYSNTPRAQENQNHHQIVLPRPQNSNPLHSGRN*
>comp301012_c0_seq1
MTASN*QGT*LQTRETKIKL**N*KVQKV*LSLV*NILV*NNYILAN*YYAEAGEKKEDSWDSFHK*T*L*LELISVLKFPNYA*P*NKIKHL
>comp139212_c0_seq1
MASKTQASILLLSLFTISFIVKSSEAAGSIAVYWGQNGNEGSLRDACDSGNYDILILSFLNVFGGGRTPAWNFAGHCGDWSPCTKLAPEIQYCQSINKKVFLSLG
>comp36781_c0_seq1
ITPIISLIFSPLLCFFLPSLLSTPLDNIVITPI*
>comp48445_c1_seq1
MSLAGFFITVQLIPVASRYVLKKNLFGYDINKKGTVQGNVKVPESLGIVVGIVFLVLAILFQYFNFTADSNWLVE
>comp325775_c0_seq1
SNVHLVTLRDKEPTKNIH*
>comp558218_c0_seq1
MSKIATLFTRMISSTSIFHIFISNL*
>comp185666_c0_seq1
MNMTSFDLIVRTAVLGWANPRLVTLGFIACHVMIFKSCPLWPYFVVYHGKSACSLLPMVDWALILIDY*
>comp48039_c0_seq1
MPVRKYYCDYCDKQFQDRPADRKRHVRGIQHQQAKARWYDSFKLEQHLPIPIPVPNPPHGLAKPLCFHFINTGFCRYGDSCKYVHPKNLPHANNIISMGLGSPLVGASTPTLTPTPGNVVRDSMGMSWGNLPPSLQPPPEAGYPPLPFVDWG*
>comp60495_c0_seq1
MFKTGVIVLPMVFMDVSETITFFCFAVVLRFSMKYEESTIRNYLYFGAL*
>comp18798_c0_seq1
MIVIFCICYCVLHRKHFQSGLNFTACILKLMLFLVELVWILDISFIWLQGWLAGLK
>comp284090_c0_seq1
MQAYKEQKHKTIVIKLRLIINSTEALSQWVTCVTTYPKGCHDTSDN*
>comp171203_c0_seq1
MSTASDVFRLRGNPFCRPWMASSGAAAAAPAGNKGLKGIVAGGITGGIEICITYPTEYVKTQLQLDQKTKGGTGVKQYNGIGDCVKKTVKNHGFFGLYRGLSVLLYGSIPKSAVRFGAFEYFRGYAVDEKGNLSPTNRVLGGLGAGICEAILAVTPMETVKVKFINDQRSGNPKYKGFFHGVRLIIKDSGFKGVYQGLTATILKQGSNQAIRFYVMETLKDKYRGGDPQKTVPKYVVGAFGAIAGAASVYGNTPIDVVKTRMQGLEAHKYKSTVDCFLKIWKQEGVLAFYKGTIPRLSRVCLDVAITFMIYDSFMDLFNKVWP*
>comp56684_c4_seq2
MDPSISHILYMYAQQIIINILVENLHTGLQTWGKSFELISLGELLRKIMVMKLILEPNV*
>comp53642_c1_seq1
MNNQLFQTLQIIKCRTCNVHQEIYTLSHQRPLFLWKQL*
>comp17256_c0_seq1
MQLAWFWVLFLWFLLSFSKRQHGFIVFFLPFFFSLKNSFFPPSFNLLRNLLLHDINSEIKRAEVSTEAMRYMKVCCFRISLTLPVTPFSLSYQLASPNYTIETINNGNKCVLWRCSSLCLLYLLC*
>comp1949_c0_seq1
MIKKPQVGNMSYCNLISHFILCSYLAHLL*
>comp36334_c0_seq1
MFTVVAGTPGYLDPEYNKSSRLKEKSDVFSFGVVLLEIITGQPAITKTEERTHLIQWLSSMMPEREVNDIVDSRLQGEFDIDSAKKALDTAMACVAPTSINRPTMSHVVMELEQCLAME
>comp56989_c0_seq1
MAMANLARRKGYLVVSRNMNISSETLRYSLSLASFSSPRGFASGSDQNDVVVLGGGPGGYVAAIKAAQLGLKTTCIEKRGTLGGTCLNVGCIPSKALLHSSHMYHEAKHAFANHGVKFSSVEVDLPAMMAQKDKAVSNLTRGIEGLFKKNKVNYVKGYGKFVSPSEVSVDSLEGGNTVVKGKHIIIATGSDVKSLPGVTIDEKKIVSSTGALALSEIPKRLVVIGAGYIGLEMGSVWGRLGSEVTVVEFAPDIVPTMDGEIRKQFQRSLEKQGMKFKLKTKVVGVDTSGDGVKLTLEPAAGGDQTIFEADVVLVSAGRTPFTAGLGLDKIGVETDKAGRILVNERFATNVSGVYAIGDVIPGPMLAHKAEEDGVACVEYIAGKVGHVDYDKVPGVVYTHPEVAYVGKTEEQVKELGVDYRVGKFPFMANSRAKAIDSAEGLVKILAEKETDKILGVHIMAPNAGEIIHEAAIALQYDASSEDIARVCHAHPTMSEAVKEAAMATYDKPIHI*
>comp35145_c0_seq1
MFVPPVNRECKSRTSRLQHPNMYHINQDLFFYYIININKILLETTNTPVHKVLYTRGSNRVNQKENKTNCRPHLTRGDKHG
>comp34109_c1_seq1
MPEKQPQLNGAYYGPSIPPPKSYHRPGRGGGFDCCCGCLFSLVFKLILTIIIVVGIAVFVFWLIVRPNMVKVHVTDASLTQFDYTNNTLHYNIALNITVRNPNKRLGIYYDYIE
>comp3280_c0_seq1
MITIYCFPTNGNCDNWHCLVNLLMELLKLYICVCMFANILRSEFLACQQLRPMQELWSSLLF*
>comp55325_c0_seq2
MIQCLEWEPSGSFYQKRTVIPVIPNVNGDSIDHSGASGIIDMNLAADMTDPTLPPNPRKATLYRPSVTHLIAVMATICEELPPDSVVLVYLSASGKAGLNNVSQMENSGGSSKYSRRKILSQTSQEQNCGTSESQNNGKRELSFYDNYLWFGPKGNGGSNNLYPGDLIPFTRKPLFLIIDSDNSHAFKVLHGAEREETAVLFLSPLRPIFKNPSDVNSHNGSQFTFFLTAPLSAFCQMIGFFPSEADTDIYNEAENILAHAFTEWEIILCSSTSMDLVWAQIITDPFLRRLILRFIFCQSVISFFCPSEESEQYLPLCLPHLPTSVAPKSEAVRSAVMQLAMHFDVADSFHFTDT*
>comp56019_c0_seq11
MEVEGGGLIFAQFPTKDVPLSWSNPYVQVDFITGTSILSYMEATRDPVIKFSLTKTVVGQQISPEVAFFSSRGPSSLSPSVLKPDIAAPGVDILAAWSPVSSARLLSDANQNELPPLNFKIESGTSMACPHISGIVALIKTVHPTWSPAAIKSALITTATLKNEYNQYMGAEGAPHKQADPFDYGGGHVDPNKVTDPGLVYDLEHSDYASFLCSMGYNDTAISLLTGSPTRCHKSPKFLLNMNLPSITIPELKQPLTVTRTVTNVGPVKSLYIARVVAPIGISVTVEPPILTFSSKRKKMKFKVTFSSKLRVQSRFSFGYLFWEDGLHEVRIPLTVRSVVDEFWI*
>comp40829_c0_seq1
MQFNSELTLANYPKVIKIYNMVLFCSFKPKVQNIVAALTAWFSILTFKIRNIITN*
>comp27480_c0_seq1
MASKPLLSFLLIFSSFSHLGFSDLAFDQILQGIGQDAVAAQTRVQCMQKLLPCQPFLKSPNNPPQACCLPLNEMIVNETECLCTFFNNPELLQSMNISKEDALKLPNACGAHADISKCNTETSSPTSSPSTGTDDTDPADNTTEGSTSSTKMITPYGITHFGVPGFVALLTALVFSAYQA*
>comp97_c0_seq1
MVQGTIGYLDPEYMLTNQLTEKSDVYSFGVVLVELLTGRKALSFDRPEEERSLALHFLSSLNHGLLFDVVEIGIVNKENEEMIEEVAVLAASCLRLKGDERPSMKDVAMELEGI
>comp48538_c0_seq1
MDIGGKLKKGAGGRRGGGPKKKPVSRSVKAGLQFPVGRIGRYLKKGRYSQRVGTGAPVYLAAVLEYLAAEVLELAGNAARDNKKNRIIPRHVLLAVRNDEELGKLLAGVTIAHGGVLPNINPVLLPKKSEKATKEPKSPKATKSPSKATKSPKKA*
>comp123525_c0_seq1
MEEIHELLVTFMEKHSVANGSSGEKEEHGERIGSEEEEDLSRTWVKKVELPTFEGSDPMGWIA*
>comp239526_c0_seq1
MSTPDHYARDRKGNNVGVTHIQHSLGKCICQRIR*
>comp54510_c0_seq1
MQGCTGVAMMGSLQQPVWTKGLNFPAKGCGSNGIIPQVKFYNVKPCKASYVEGSLATGRPSSFPVSVPEIGGDQSSFLDYGLSEADPEVRAIIDKEKDRQFKSLELIASENFTSRAVMEAVGSCLTNKYSEGLPGKRYYGGNEYIDELETLCQERALAAFHIDGKNWGVNVQPLSGSPANFAVYTAILKPHDRIMGLDLPHGGHLSHGFMTPKRRVSGTSIYFESMPYRLDESTGIIDYDMLDRTANLFRPKLIIAGASAYPRDIDYPRMRKIADEVGAFLMMDMAHISGLVAASVVANPFEFCDIVTTTTHKSLRGPRGGMIFFKKDLVHGVDLESAINNAVFPGLQGGPHNHTIGGLAVCLKYAQSPEFKIYQNQVVSNCRALANRLIEHGYKLVSGGSDNHLALVDLRPSGIDGARAEKILDMASITLNKNSVPGDKSALVPGGIRIGSPAMTTRGLGEKEFVLIADFIHEGVQITLEAKSLASGTKLQDFLKFVSSPEFPLGDKVSDLRRRVEALTTQYPIPGV*
>comp17394_c0_seq1
EGVLASFNSLHKITAIKSQLSTLTISILRLSCNERHINPSP*
>comp59245_c0_seq3
MASGPPIVGGDDGAREKQRYTESKVYTRKAFKGPKKVANAVAPATATTNNDATATTTTTTPATANINSSNNDTVKNSNSDQAKSNSDNVSAQPPAPVTTVPEDGNSAQPQVNSRLDVVSDEPSSLNVELDEPSSPNREQDAVPSTRDLPSGNGTVEPAPENRIKISLASKSNQEMRELRWKLERELDMVRSLVKRIEAKQGQIGGGYGNSNVLVGDGVDNGGGATRAHSEVASVGAPRQSTRPLHQLSLSMLENSQGVSENVEKEKRTPKANQFYRNSEFLLAKDKFPPAESNKKSKLNWKKQGGGEMGHGVGMGSKFFKSCSSLLEKLMRHKHGWVFNVPVDVEGLGLRDYFTIITHPMDLGTVKSRLNKNWYKSPKEFAEDVRLTFHNAMTYNPEGQDVHVMAEQLSKIFEDRWAIIESDYNREMRYGIDYGAAPPAPSPLSRKAHAFPPAPLDMRRILDRSESLTQTSKPMSITPSSRTPAPKKPKAKDPHKRDMTYDEKQKLSTNLQSLPSEKLDAIVQIIKKRNSALSQHDDEIEVDIDSVDAETLWELDRFVTNYKKSLSKNKRKAELAIQARAEAERNAPQKSQVPVMVEVSKETQADERNVPPSLPVQGGNQADNGSRSSSSSSSSSDSGSSSSDSDSDSSSGSGSDAGSQGT*
>comp147204_c0_seq1
MRF*PYHLASNNQYSSSQQK*FK*LHSCS**ICEL*KSEKEKLSARKY*NC*VGKIPFSQH***FDK*NE*R*ALIFGLFFPYNM*
>comp375995_c0_seq1
ENTKTHCLSSKRYKCKKDKLFKNLYKVRK*
>comp41257_c0_seq1
MGDRYNNIYSVPLKFHFICSDMDTAYFLKCLRFIDFLSSHSNVLYIFSLTAIIDALKMHFSKENTNSRNDRTPVTVLIPKRTDGLKIVAPFYCNLTSAFPAQPSKSYSSV*
>comp50382_c1_seq2
MASSLISNPTTTNTDRSRDTHRKKKKKAQQKHQQEDQSHRPKWKSQAQQQNYSSKLHQALARVNLGPPSSATGGKAVREAADRVLAVAAKGRTRWSRAILKNRLKLKLKLRKQKHKRVTTTRSSKKPRVSVFRLKGKTMPAVQRKVKVLGRLVPGCRKEALPVILDEAIDYIPALEMQVRAMTALADLLFRSTSSDSASTSTSAPPT*
>comp163152_c0_seq1
MMADKHGPIFTITLGSYKVLVLSSWEMVKECFTVHDKTFSTRPSVAASKLMGYDCAMFGFTPYGPYWREMRKLATIELLSNHRLELLKNTRTSELETAIRELYKLWSREGCPEGGALVDMKQWFGDLTHNIALRMVGGKPYYGAGDDYAEGEARRYKKAMRDCICLFGVFVLSDAIPFLGWLDLNGYEKAMKRTASELDTLVEGWLEEHRKKRALSTNRNEEQDFMDVMLNILQDAEIYGY
>comp84336_c0_seq1
MKHGYFRNHAILVFNMYHVLVIVEYVGVQLGYGHESSYTFFFIKNCAFQCNFFCQNTKICIGS*
>comp34227_c0_seq1
MSNYTLLELYRVPVNLHLNCKSKPII*
>comp53752_c1_seq1
MTWCNDSDEERGIELITPTIIPRANNTVVTDTIATEIRTITCPACGHNVEFQDQAGIHDLPGLPAGVKFDPNDQEILEHLEAKVLSDVPKLHPLIDEFIPTLEGENGICYTHPEKLPGVSKDGQIRHFFHRPSKAYTTGTRKRRKVHTDEEGSETRWHKTGKTRPVFVGGAVKGFKKILVLYTNYGRQKKPEKTNWVMHQYHLGSNEEEKDGELVVSKVFYQTQPRQCGNSIIKDPYEKRLTHRSDHDDNTIPQNAALVDYYSDPFINYDHLGHNRESSPQLIPNLVVQGDSSSFIRLAMDANKARLDRK*
>comp311446_c0_seq1
MTSYDGSTISIASILIKHRSSVWMQNSEGATPLHVAAKSKACDPVYFRKLLEQRGAENIQDKDGNTPLHLVALAVSVPNFAKLKKVIQHLLTSKARLDIINNEGNRPLDNIHPKCKEIMREFLPKRQ*
>comp40533_c1_seq1
MEKLPTLAMHNFELPFVIETDASGYGIGAVLMQQGRPLAFISQALSEKARVKSVYERELMAIVLAVQKWHQYLLGHHFIIRTDQQSLRFLLEQRVLVGEQLKWATKLLGYDFEIHYKLGAENRVADAPSRVMEYKAVSMITNHDLMELS*
>comp155091_c0_seq1
MEILAHPSIGGSLFHSGWGSVIETLQFGHCLVVLPFIIDQGLNARLLVEKGLAIEIEREEDGSFSRYDIAKALRVSMVLEEGEGLRVRARKAAKDFGYRKLHQEHYIARLVEFLFPPFISA
>comp51919_c1_seq2
MTDRFWNRQQALLPHSGMLKRPRSDYDMPASGLTSGNEMHNYIAQDDDHTGHRMLKDTKTLGSAYDRYLQSGQLTSFSSGEASTIGGLGLARGVGGLPGHSLADPAVMGRHGGGGPDLAPNGRNVNYGGQLPVDAVSRPGPETVPLPPDASSTLYVEGLPSDSTRREVAHIFRPFVGYREVRLVSKESKHRGGDPLILCFVDFANPACAATAMSALQGYKVDELNPESSHLRLQFSRYPGPRTGPGSRGKR*
>comp183214_c0_seq1
LEVGSYLGERRRGGVEPNHLAFFFCSALQQYASTIAFLLHIQLHKTVNALGVHPWRRCGAQIFQSERQASKYNSAF*
>comp43815_c0_seq4
MDRQYLLFFLGFICIVVAGVGGQAPSTSPTSSPAPPTPTTPTASPPTSTPAPPTPTTPTPQSSPPPAQSSPPPVQSSPPPASTPPPATPPPASPPPATPPPASPPPATPPPASPPPASPPPATPPPATPPPAVPPPAVPPPALTPTPLSSPPATSPAPAPAKLKSKAPATSPALAPSPSSEAPGPSLSSLSPTGSDDNGVEKLWSLRKMVGSLVFGWALLSLLL*
>comp36466_c0_seq1
MSSSSNSSDSSSVSSEAPRGCLRFLLSHSSSSSSKSTVHGPKNLPKTPNSAPNALALKHSKSNSSEENLSKGNTGKQAQRHTLGKARIFRKNASCLYHWQSGKKSVSRNGQKSRPCSVLNEHGNFLPRFPSASEELK
>comp47940_c0_seq1
MDRVKDLASKKAAVIFTKSSCCMCHSIKQLFYELGASPAVHELDNDAYGREMERALRGLGCNPSVPAVFIGGKFVGSAKDVISLHVDGSLKQMLMDAKAIWF*
>comp295644_c0_seq1
MKTFCKNPGLFHINCFEVPFFNSTRQLSFQEDYFLSV*
>comp59353_c0_seq8
MEARMKKYRQVSPERAKVWTEKSPKYHQSRKVPVIYYLCRNRQLEHPHFMEVPVSSPDGLYLRDVIDKLNALRGRGMASLYSWSCKRSYKNGFVWHDLCEDDLILPAHGNEYVLKGSELFDESNSDRFSPISNVKIQSLKQLPEPASSRSHDEASSSSSMNETGTRHSQEDELSQGPHTGSSDVSPESRAGKSGSLSLALTEYKVSKNDGLADASTQTEENVRRPKTQKTCTRGVSTEDGSLESECHEICQTQVPQLKDNPEICRDTVSPPSTSSASSSGGKMETLESLIRADASKMNSFRILEEEGIRMPTNTRLKASNLLMQLISCGSISVKNHSFGLIPSYKPRFSHSKFPSPLFSTSFVLGEFDCLAENPKLMSLRLEDKEYFSGSLVETKILKAGDGHNVLKRSSSYNAERTFKELKPQEDKEESSSGHSKCIPRSIKASLTKQSRSESMRSPVSDGPRSSSDRIDGSDISPVTSNGSSKRITEPSSGKKQSKRIDSFREEEVIKIEERLASGARVIIQSKPFCDSASSSS*
>comp306726_c0_seq1
IFLVFLLSPHFFQVFLYLFNFLDFIAVRYLFNTTQSLDT*
>comp232323_c0_seq1
MGYLLVFLSSIFFGIVYGPWRKNNNTSMFSICLAYFLILVFG*
>comp59942_c1_seq2
MSSNLFSSQSHNNNNSLRVEKEKETPRERDMDGMQIALPIAGIVAAAAVTFYAVSFSELREKSFRDVEESESENGGYKPFPSSREKRARRQANKNTKS*
>comp117200_c0_seq1
MLTLFVQHNHSKQTMFWVYKMRHRRTLRRKKKSKLFNRFSHQLIQEEGSEWRNQNTSLCVIFS
>comp38137_c0_seq1
MRIIKSPRSNIKPFFCFTPIATKSKNTEEKDKEFRLFNFSFFILFYEFYHFIVERDQQFLSGL*
>comp324234_c0_seq1
MYVSKELNKNQRVISDYLKFKKLHSRIWQQLSQKEKPVPKPPHRCCSYFNSANVHFLNAFIKNTASAIEKLTTLKTKHTSNTTT*
>comp44072_c0_seq2
MMKLLDAHCHLQDPRILSKAPQLIKTAQDSGVVGFAVNGVCEQDWHLVKQMAEAYPSVIPCFGLHPWFVAERSPNWFKTLKEYFDSTPSAAIGEIGVDKGSQGRQIDFSEQIEVLRQQLELAKDLNKPASVHCVRAFGELLQLMKSMGPFPAGVILHSYLGSAEMVPEFSKLGAYFSFSGFLMSLKANKAKKMLKMVSPDRILLETDAPDALPKSNIDSLLFVEGDTSLPKELHGRRTTSSSNSGSSLSNSSHALTDASMLPKETLNHPANIHNVLDYVASMLEITKEELAGLSYQNAVRLFSYEGSKVLQNF*
>comp203872_c0_seq1
MCTIHGSNLAMSSLVLAIIKCNVICTYHTTLFCLYCFCYCIFTCGYYFRPCLIFASLYLVNLLF*
>comp54062_c0_seq1
MASFLSLSLPKLNLIKASSASTTSTTSLSTPEALNEKFSRKGIKFLESDNISIVELTVRNGSSLRLRIPDAHVTSYKPKVYWKDDGFEEVLYTVPAGGTGPSKAKGGIGLVLNEVLEPGAKESLPSTLEWTVNDVDSDAIDALQVELSCTSRIFDITYVVTLYPVSVATAVIAKNKGPKPVTLTNAILSHFRCKKRGGTAIQGLRGCSYCSHPPLSSPFQILTPAEAMKSEPHVWLSFGAEPELKPGSWTQQGVPITLLENKMSRVYAAPPTERSKAFYNTPPSKYETIDQGRELSFRVIRMGFEDIYVSSPGSLSEKYGKDYFICTGPASILVPVTVNPGEDWRGAQVIEHDNL*
>comp41336_c1_seq1
MANSVSSRNPPSPFLEVKKYKNDQDTLITVISVLLGGSVFVNFMLVGAICIGFFFCYRKKNSTNKTVAESNLRSFTFGELVQATNNFKDELGRGSCGIVYKGTTDLTTIAVKKLDKVLKDSDKEFKTEVNVIGQTHHKNLVRLLGYCDEGEHRILVYEYLSNGTLASFLFG
>comp17329_c0_seq1
ERILNPAPVSTAILRRRIGYCAFVSTRRRIEDSPHRIQPEPNLQATSNAAELVI*
>comp55321_c0_seq11
MDVEPDKISCLPSHIIDQILSHLSIREAVRTSVLSSKWRYKWATLPNLLFDNQCVSVASQDHSIIKDRLARIIDHVLLLHSGSINKFKLSHRDLIGVTDIDRWILHLSRRSINKFVLEIWKGQRYEISACLFACQSFIHLELFNCWLKPPSTFQGFRNLKSLDLQHVTLAQD
>comp32038_c0_seq1
MHMEKTLGLRKGTWTHEEDKLLRACIQKYGEGKWHLVPQRAGLNRCRKSCRLRWLNYLNPNINRGNFTEDEVDMILRFHKLLGNRWSLIAGRLPGRTANDVKNYWHTKLRSKVDSNKEDKKVKEKPEEAMKTHVVIKPRARTFSKHPPWLRGKHIFVNDGCARECATPLVAANDDSGPRECTTTTTTPSPVFTNDNDSRECTTQTMFPIDDGVGVRDCGTQACLANVPQSAEWWESLLNLDDQVGDEGNGTYSLNGQEENSFLDFSNVEDFFTKGQRRWSDCWWDSNL*
>comp207566_c0_seq1
ATNLCLEITVKNTTKLDSSFWSNFLFLGVSNHSTKNTNKLSFNNIGYTTIRSTPLPLHAAKTI*
>comp203801_c0_seq1
MGRDGAVGRKGDQGPPGEPGPRGFPGQGGDKGPGGVMGFIGERGLDGRPGPPGLPGGRGEKGEPGIPTAGPPGPQGFTGIQGEKGIPGSPGKSGQKGEKGNSGE
>comp20074_c0_seq1
MSAPLEQVAGSVTRNGICLKGTLATPDYSNIGELQSLNMKLRQALDLYANVVHVKSWPGIKLRHEGIDAVIIREQTEGEYSALEHESVPGVVECLKIVTAAKSERIAKFAFDYATKHNRKKVTAVHKANIMKLGDGLFLRSCQDMAKMYPKIEFEAMIVDNCTMQMVSNPQQFDVLVMPNLYGSILDNLASGLTGGAGCVAGASYSAECVVFEPGARH
>comp49810_c0_seq1
MAVSSRPFILSRITDLSLHPPKPPPPRLLFPPLRRRRHLSAVTRCLVSGIDGGGGGCFSDDFVSTRKSSFDRGFTVIANMLKRIEPLDNSVISKGVSDSSKDSMKQTISTMLGLLPSDQFSVTVTVSKRPLHRLLVSSIITGYTLWNAEYRMSLMRNLDLSPCSAKGSCSSTQTEVSQVQDGEIEVVSDLGFGDLESCSTRVFGDLPPQALNYIQQLQSELTNVKEELNAQKQEIMQIEYDRGNRNNLLEYLRSLDPDMVTELSRPSSIEVEDIIHQLVQNILRRFFGDDASSNFMEQSVEGNIDNLPDSDEFCDTVGTSRDYLAKLLFWCMLLGHHLRGLENRLHLSCVVGLL*
>comp53533_c5_seq1
MAVIFGSFMEKLSKVYLRSNYHRIHLR*
>comp23586_c0_seq1
MEWLASLGEIQANFKELTLKVPTSEGAKLLRGEPALARASASFKTVVKALQNEGQG
>comp40951_c0_seq1
HSTVRHKRKKRKNNIKDKGAKCWCPFEFQIGGSGYAIEDLRPSYLGFAFSSTIVPHFYSHFSIIYILTLGFLE*
>comp290847_c0_seq1
MESIIQGHDIHSVLSLLIFMLCYVML
>comp59323_c4_seq1
MKGSRGIVTQANECNVSEEQNGDLGCNNLSYVTRGWKARETVRRKALREGKGEGEGYQVIE*
>comp18043_c1_seq1
MIVQNAEHNYFDLFGHLHIHALSHALVIGTCF*
>comp509798_c0_seq1
MIKKHPPLFLIAFGIRRQCNITCYLCECIIYKPPSIHFIINII*
>comp41872_c0_seq1
SPQSCTENTLGNKKHCNQKS*
>comp372065_c0_seq1
NCQLLKSPINEIKIKITYQYYKLFFAILKLFNCFSGCKSQ*
>comp36012_c0_seq1
MVLSYEGKLVYTSWINRHIVGKRIIQENNCDIYGFCGTYGSCDSNNSPICSCLRGFEPRNVDEWNRQNWTSGCVRRAALQCEMKNGSEAGKGDEFLKLQMTKVPDFAQQSSVSVDTCRTECLNNCSCTAYAYDAGIGCMYWSGDLVDLQRFSSGGVDLYIRLAHSEFGNAEKHTDKRRGKRLIIAITVATGTIILAICAYLAICVYRSRKGTAKHTESQSQ
>comp220068_c0_seq1
MAFCGPMCQPKTDSKDDIAAAERCYQFSYGWFAHPVFRGDYPPVMRELVDKNSKEEGRTVSRLPYFTEEEIKEINGTVDFFGLNYYTTNLINDGVIGDFPSVTRDAHYLTSFDPSWPSSEADWLKIVP
>comp42062_c1_seq1
MTLFMPNFFLKKCSASLTCIKWPGRLLRLCSARTKPQFINQNFASNFCRVDNCAQNQFLVLYS*
>comp41936_c0_seq2
CTFSTTSQSPFCFLNFKKIYNSSITHCSQNTKSIPSSQSNQNCVKVCILYNNDYILFTLFTTFTNHYYEATCKVRKLII*
>comp47718_c0_seq1
MAEEPQSAIAKASAFIRKYVIPLVATVIMYLIGLFWGLVVVFRIVNRYRGDIGKVFVVKKRPLPPKILDDPELGNHCYIQLPNIKLHYVESGDKSKPLLILLHGFPEFWYCWRHQIKEFSKDYWVVAVDLRGYGDSEKPPSVKYYSMKYLTEDVKNLIEGLGREKAILVAHDWGGVIAWSTVLRYPEMVEKFVILNAPHPVAFGKHLVSSLKQFLQSWYMFFFQLPFLPELFLRADDLRLFALFFKSKKHTSVLNEEELEAYKFTYGKPGATYGPLAYYRANVLRRYRSSKESDKKKATPSSDLPKGFLLFGEEDVALDVKLVELSKAAFPNLETEIIPGACHFVQEDEPAIVNAKIRGFLES*
>comp40729_c1_seq2
MGNIELLPHILAFLLPKFLSACLAYRWHLKKIKFENSNTILTLQQGVCLAQRPSDKN*
>comp49931_c1_seq1
MKMVVASSNTEEEKKGAFQEPAQKVDPYFFMMTVVSTVNFTLTVVRIASVKAASFGVFDHNM*
>comp266926_c0_seq1
MNGWDVNRKWKVLSYTHIHVYLIFFKSKLEDLYCCKIDAPYPHHSSCGICDTHIADNLVTVH*
>comp206519_c0_seq1
MSDSHIFLTGPNKFFFSYHTEAFLIFLSTLVQIKII*
>comp2796_c0_seq1
MFSAQIFTCEVAFACVVASAFSLPSLPSKDAFTCIQPATLPFHLPSVPCVLLAERFT*
>comp56235_c0_seq3
MNRWDKMDDDTNSWIRRTKFSHTVCHRLDSSRLGSIPISIQLEHNSGLKSKSAAAAASYNLRPVSEVSQVQKNLITNKQRSLSPLPETFLSETFKSARHEQKRFSTPGPRRKEQDKRIMGKLLNKDSRETKLSNSKSPYNSPIRHFASMKLNDKSKQRKDLAWTKYFDHGGGRVTAVETAEEWTVDLSKLFLGLRFAHGAHSRLYHGMYKEEPVAVKIIRVPDDDENGTLAARLEKQFIREVTLLSRLHHQNVIKFVAACRKPPVYCVITEYLSEGSLRAYLHKLERKTISLQKLIAFALDIARGMEYIHSQGVIHRDLKPENVLINEDFHLKIADYGIACEEAYCDLLADDPGTYRWMAPEMIKRKSYGRKVDVYSFGLILWEMVTGTIPYEDMTPIQAAFAVVNKNSRPVIPSNCPPAMRALIEQCWSLQPDKRPEFWQVVKVLEQFESSLAHDGTLKLVQNPCCQDHKKGLLHWIQKLGPVHQKSGPVPKPKFT*
>comp26292_c0_seq1
MKFARKGKESRICSYEQTFFNLDKQVLPIFQQCV*
>comp31233_c0_seq1
MTSTFYITITYPYLTWQKLEFCFILNIWEEPYYLFSY
>comp52548_c0_seq1
MLVITYTSEHNHPWPTQRNTLAGSTRSQPSKNSAASKNSEITQPQKDTTKPKDEQQESNSDSNGSQVVAGNSANSASMKEEIDDIEKQLEMDDKEYSDGLPYKPSMLKCNQSEDFFAELGEIEADSLNLLFTQGFNAADDQQREAKASDPFHLFDWSGDNRTITTSFEEPKRML*
>comp33026_c1_seq1
MKYYHNSHVSFPFFSCLKPRWLSRIYM*
>comp29406_c0_seq1
MAKIIDETTRKMTQLCRRIVHVNVHWSVLERVSFVGRFFRFIWDRILVCSVGKPARYRRLSLRDSSSVPPEATVDGFMQGHPTTANGGCDTDSDLV
>comp49104_c0_seq1
MDGTDFFLHPIFTRGISGSIHLVLLLVLVVSWVWEKVQGDHRQKHERNGFLCYKQSLVCSLVICVFSLVLCLLNYFYWYKNDGPEELVTISDLALRTVAWAAVSAYLYSRNSNAQVPSFPCFLRIWCWAYAFVSSCCLVIDFVSYGKHVFFPIIYLVSDIGSSITGLFLCYVGCSVNNEAKLAPLEEALLNGDSSVSNNSNPNKPRGAENLTLYSNAGFFSVLTFSWMSPLIALGNKKSLDLEDLPLLAIDDSAYGAFPTFRNKLESECASITKVTTLKLVKALIFSTWKRILLSGLFAFLYTCASYVGPYLIDIFVRYLNGEHQYKDEGYSLVLTFFAAKLVECLSQRHWMFKFQQVGVRIQSMLVAMIYAKGLTLSCQSKQGHTSGEIINLMTVDAARVGEFCWYMHDPWMVVLQVALALSILYRSVGVASIAAFVATVIVMLINLPVGSLQEKFQGKLMEFKDKRMKVTSEILKNMRILKLQAWEMKFLSKIMQLRKTEEIWLKKFVVGTAIIRFLFFNAPTFVAVVTFGTCVLIGIPLESGKVLSALATFQILQMPIYSLPDTISMIAQTKVSLDRIASFL
>comp364148_c0_seq1
MPGVPLSSDQPHHCHHHPQISPPAEAYRHQSCHTPFIGNWPAFPRWSQGHVTQLFRPSPPQICSPSPFLSYPFVAPHFHHSKGMS
>comp136771_c0_seq1
MGRFLLLFLSFFLLLLFHFPSHSSSLVPFCNHEESSTLLRFNNSFALNSLASEGMFRCYSSYPKTTSWENGTDCCLWDGVTCDTKSGHVIG
>comp59407_c0_seq1
MAYKAIAEYGLNKTIGPVSIATLSNGGMDESGGAVPWGRDQGHLVDLVQREVQTLLQSALAVARSIVQANPTVLEGLGAHLEEKEKVEGEELQKWLRLVVAPTELAIFIKGKQESFLPLQTGS*
>comp38677_c0_seq1
MIRVSFAFANIRPPASSRPLSILPADVSPVSDEESRLRILPPTQQATIHNEPNDLKQIHIPPSIASIRVTSQRIDVSTNRTVIRF
>comp280718_c0_seq1
MPYLALLVSNYIIFLICMQVSLCRFACLFKFPDFQNRSYDLLLEHNFIFLSRRRKQVLFS
>comp151152_c0_seq1
MKTTYNEAFLAYIHDQPGISIHSTCFKFLWHKSFLVSSFPGLLINSTFTWGFSITRSLVYYTFVPLQHNYQIKIIPNYSGPFL*
>comp54867_c0_seq3
MAKDAEVAERGSFSAKDYHDPPPAPLIDGEELTKWSFYRALIAEFIATLLFLYITVLTVIGYNSQSDVKAGGDVCGGVGILGIAWAFGGMIFVLVYCTAGISGGHINPAVTFGLFLARKVSLIRAIMYMVVQCLGAISGVGLVKAFQKAHYNRYGGGANKLAPGYSTGVGLGAEIIGTFVLVYTVFSATDPKRNARDSHVPVLAPLPIGFAVFMVHLATIPVTGTGINPARSLGAAVIFNQEKAWDDHWIFWVGPFIGAAIAAFYHQFILRAGAVKALGSFRSNPTV*
>comp43167_c1_seq1
MYAIGGSANPTINSQGNRFLAPDIRFSKEVTKHEDAPQNEWMGWNWRSEGDLFLNGAFFRQSGAGASSSYARASSLSARPSSLVGSMTITAGALNCRKGTSC*
>comp43687_c0_seq1
MSN*I*FSFLVIFCLI*TIPNKLSLIKRIFFL*D*LCLQPEHVFVPFFLKEGGLAFKYYYLLYFWCFSVYDNIYIFLYLVSFMCA*
>comp58738_c2_seq1
MKITVMMVIDLGSCHLLKASDQHFLIHLILFNFYNTSSYCK*
>comp554142_c0_seq1
MLMDEFLHAHNWVRSKYNQPPYMWDENLATSAHQYLTQRYFDCK
>comp250944_c0_seq1
MKSNRKIPGHAGNFLQ**KHFSTQ*ENILSESANPTIFLS*YTLYIKVVSIANLIFVQSC*IKNPFFLGTKIKNPILLE*SIYPYYCFNLHEN*FSGRGQSAQL*ALSS*CSLLTCCM*
>comp115713_c0_seq1
MGACSYLVSFIFINGLLLSHFSCLGIASEDVSALSSPERPLYGFSYKLKMEVVPDRVNMIPPPPAPIPNTPYHFIPPPSLPSP*
>comp58535_c1_seq1
MHLVSISETPYVHHNVQCKEETAAHLYSLPKKQFKNT*
>comp49772_c1_seq4
MKALGWWLMLVGTLRLASVWFGFFDIWALRLAVFSKTTMTEVHGRTFGIWTLLTCTLCYICAFNLENKPLYLATFLSFIYAFGHFLTEYLIYHTMEISNLTTVGIFAGTSIVWMLFQWNAHQNVHLKHS*
>comp392075_c0_seq1
MFFSNYIYRICQKISVPTLLSM*
>comp47157_c0_seq1
AAVECFSGRTRLQHFPRYGSVRSSVLVGWRLVVTISVRCPFVTCDWSS*
>comp443_c0_seq1
MLSHHLGLYTHPFEYVGWLLICWRSARC*
>comp56118_c1_seq1
MGAPPRFEEKFSGKVCKLKKSLYGLKQSPHAWFERFTKFVRKEGYSQGQSDHTMFVKHTNCRKMAVLIVYVDDIILTGSDSDETSRLKTHLASEFEIKDLGPLCYFLAMEMARSKVGIFVSQRKYVLDLLEETGMSGCRSSDTPIDPNQKLGEKSSGVPFDKGRYQRLVGKLIYLFHTRPDIAFAVSVVSQYMHSPYEKHLEAVYKILRYLKNSPGRGLLFKKSNQRCVEVFTDADWAGSISDRRSTSGYCTFLWGNLVTWRSKKQNVVARSSTEAEYRAMENGVCEVLWIKRILEELRLDVESLMRLFYDKKSAISIANNPVQHDHTKHIEIDRHFIKEKLENGIICMPFVTSEQQTVDVFTKGHFRPKFESFIDKL
>comp390585_c0_seq1
MGSSEIFKCPYNFLLSDLFYALNCLQHFLSLSCFFLGGALMRLRCSSLLN
>comp350611_c0_seq1
PITEEIREEPIAEDPSSRLEAESVSAAAEPASTADASPEETSAETPVQVTAESNEEIPTTEEPQISEVVESPSTDNLPIETTEPIVEEPTTPIPEQ*
>comp2416_c0_seq1
MGLQHHLTIDQMRYLPQNLPFLTTGSP*
>comp276661_c0_seq1
MVCTLWKPLPFKIYQYLITFSKLFEMAMLVCCLFVMLITSFNGSSYFIMYVADMINKCCSIFANSSLFW*
>comp182414_c0_seq1
MFGMSPHCNTMTLSSCWCVIGCKELTVNNLLPLLTPASDGHSTIFH*
>comp49553_c0_seq4
SCWSRTSTISRIEKCQSLGKQLFYTRLASIPHRYDAFWKEVDYAKNLLKNRRDLNIENAGIGALFGLECFAWFCGGEIVGRGFTFTGYYV*
>comp2597_c0_seq1
MLCFRKRLQRPGMSGGLLMLLKSQSSLPFCDPQYPDDLRPWFLEGNVTHNSQPM*
>comp53239_c0_seq1
MKQLQAHLITTGKFQFHPSRTKLLELCAVSPAGNLSFAGEIFRRIETPSTNDWNSILRGLAQSSQPTKAISWYRTMSRSPQKVDALTCSFALKACARALAFFEATQIHSQLVRSGFEADTLLLTTLLDVYAKTGDLGGAQKVFDDMRSRDIASWNAMISGLAQGSRPNEAIALFDRMKEEGWKPNDVTVLGALSACSQLGALKQGEIIHGYIVNEKLDLNVIVCNAVIDMYAKCGFVDKAYSVFDNMSCRKSLITWNTMIMAFAMNGDGYKALDLLDQMVLDGVHPDAVSYLAALCACNHAGLVEEGVRLFDLMMGSGVKPNVKHYGSVVDLLGRAGRLKEAYNIVNSMPMFPDVVLWQSLLGASKTYGNVEMAEMASRKLVEMGSNSCGDFVLLSNVYAAQQRWHDVGRVREAMKHRDVKKVPGFSYTEVDCRIHKFLNGDQSHPNSKEIYAKLDEIKFRIKAYGYIAETNLVLHDIGEEDKENALNYHSEKLAVAYGLISTIDGAPIQVIKNLRICVDCHVMIKIISKIYNREIIVRDRARFHRFKEGVCSCRDYW*
>comp51857_c2_seq3
MVSKGAIRNTLLELVQLHSPMMRSNLYGKKLLARFDRRKLRHM*
>comp39090_c0_seq1
DLSILLKANYQIIFILIYCNCCCSYCDVFFWGF*
>comp7955_c0_seq1
MNDPSYLIHNYNYNKILMNQYFPSTKKGKSESYLGGILSIHCQRNEAHWYNKYILKDWEVRKTLARRIRRPEKNMLIRKLLCLSQH*
>comp58988_c2_seq8
MGVSENTKGLILAVGSSAFIGASFILKKKGLKRAGARGTRAGVGGYTYLLEPLWWAGMVTMITGEVANFVAYIYAPAVLVTPLGALSIIVSAVLAHFLLKEQLQKMGILGCISCVVGSIVIVIHAPQEHTPNSVQEIWDLATQPVFLVYAAATISSVLALILHFEPCYGQTNMLVYLGICSLTGSLTVMSVKAIGIAIKLTLEGISQIAYPQTWFFLTVAAICVITQLNYLNKALDTFNAALVSPVYYVMFTTLTIIASVIMFKDWSGQNASSIASEICGFIIVLSGTIILHATREQEPSNMQGTLTWYIGEDMTKGLEDEHLIVIHGSDYLEHGSGYLEQ*
>comp58799_c0_seq1
MEHIQLILLTSGLLNAFALFSALYCIRKDSIMVTGQYRLNFPPDKLLAYHRCTNG*
>comp54076_c0_seq1
MYVVVNAE*RHFAGTIISQLKQKKAFQGFEYIRW*NFYPAY*K*HRKNVAKVLKIGQIDLAVYL*QQNT*H*GWKSYETTA*VKK*HNV*EIMSDDP*
>comp59971_c1_seq4
MKMKMKSVSVFLLILVLLEVTCCQGCRKHEREALLGLNARYGYPFIAWVDGTDCCQWEGVECNTTTGRVMELDLYDLFEMGDTGRLGHRYQNYSDFLVFEDLKSLDLSWNNIAGCVENEGLRLSNLEVLDLSDNSLDNDASILSCLDGLSSLKSLYLSSNGLNATSFRAFETLSSKLLNLEVLHLSGNYYLTNDILPSLGGFKSLKNLSLSDTGLDSELHIQGLSSMLINLEVLDISRNNFNESDITSALSGLSSLKSLTLRESQLTPISIHSNGISKLSSLEILDLAKNQLNDSILRSLGFAWPTSLEALGLSNNHFSNNLLSSLSGLGRLKSLDLSNNQLEGSLNISGLLVSSNLGILDLSYNDISNFVVHQGSKTLSKLDVLSLDGIKINGSMLPKSLRVFSSIRVLSLRNIEFNGTVVAGDFRALSNLEQLTLDDSSNIVNEFFKSIGSLTSLKVLSLFDCGINGTLPVADWSELKKLEELDLSGNEFEGPLPSSFGNMTSLRTLILSGNDFTGNFGSNLASLTSLEYLDFAGNQFEVPISFAPFANLSNLKVIYGEGNKVILDSHPTLQNWVPKFQLQKLSLSSTTEANSLSLPNFLLYQYNLTSLDFTGFNLEGEFPTWLLENNTKMTELLLRNCSFTGTFQLPSRPLLSMSAIDVSDNYITGQIPSTNISSIFPNLQYLNMSINKIHGSIPHEFGQMNFLRTLDLSNNHLSGEIPKNISGARSSLSWLKLPNNKLDGPVFPTLSTLEYLYLDGNSFSGSIPSSFFNTSLLELDISNNHFVGKLPSGVGNLSKLEVLNMSNNHLEGSIPSKIVESQSLVYLDISGNNLTGSVPSFVNSSSSLRFIHLSNNKLSGLAKRMFSKRSSLVTLDLRYNELTTSIHDMIQDLNYTGLYILLLKGNHFTGQIPKQLCQLITLKILDLSCNNFSGPIPSCLGKIPFENKDTRLLDMLFAGNKQIYNRTHYSLPYASEKADFTTKKRSYTYTGSVLAYMTGIDLSNNKLNGSIPSELGNLTKIRALNLSHNYLTGQIPTTFSNLVQIESLDLSFNKLSGNIPPQLSDLNSLEVFSVAHNNLSGETPDRKGQFMTFEESSYEGNPFLCGLPLPKSCTASGPNASYAEGDNNDSLVDMYVFCVSFAVSYISVLVVIAAVLYINPYWRRAWFYYIELVGTNCYYFIEDNLRKFSNIGNM*
>comp48025_c0_seq1
MEDTESVATLIDSTTSKIQQLQKAFAELESYRAVTLNLKWKELEEHFHGLEKSLKRRFHELEDQEKEFENKTMKARELLEKREADVFAKEQASLQSLQEKRDAAVFAIVNAREKHRKVSSDELAIVSGVEEKPVDAVSMAAVGNLEDVKLSPESGNMELMSYPDLAKLCKEMDAGGLHKFISDNRKNLAAVREEIPLALRAAPNAARLVLDSLEGFYCMEVPNQDVKKDANLLGLRRTCIMLMECLSVLLTNSDCVSNVISEDIKDEAKAIAEEWKPRLDSLDMDASNGNSLEAHAFLQLLASFDIASDFNEELSRLIPMVSRRRQTADLCRCLGLSEKMPGVIEVLVNSGRQIDAVNLAFAFDLTEQFPPMPLLKSYLKDARKASSPVRSVNSSPTAQIEVNERELIALKSVIKCVEEHKLDEQYPLDPLQKRVVQLEKAKADKKRVTEATKPQPKRPRANGVGYGPRVTNFPSDKTYARVADRYPQYVYDRPYMYAGPTDSHCPPLLGSATYNISPSHGNYFGNGYQYQATYLH*
>comp41445_c1_seq1
MLTYSATLAWDSGIIDQMFSSSLTTSAILGRASGTSWQHFRAKVKNFSTYSDG*
>comp189646_c0_seq1
MEVFMHLLVIILKDQNLTFVLFCWLILHLWQLSFYHAPQ
>comp288937_c0_seq1
MSQFIRSQMLMLSVIATILLALDSSSLIAGQQATTNAKLLVDKEILNKYIVEGRDVLVNYHLINIGGSVARDIKVIDDTFPQERFEIVNG
>comp354813_c0_seq1
MGPCQINCQALPAWLLINQMPMYRGFLNCC*
>comp247959_c0_seq1
MGLTKQVVASLDKKNIQRLTKTFLTLSLTDVASRVQLSSPAQAERYILNMIEEGEIFATINQKDGMVVFHDDPEKYNSPDMLCKLEDEMALTIDLDQRLQKMEEEILVNPQYVKKACGAPEEELAPTQGSKISYLM*
>comp47070_c0_seq1
MPCAFLGCFCLYYVFGSNPLLERSMSYCNKGEPCLQCLGPLRWKGSDGPPKVGPPISVYSRRKRGLGGRKVNVESVIEEREEPNLMDTWQAGIGEEEERLEYARQRRYGGMSLGE
>comp36985_c0_seq1
MYSNPPNHGAKVVCSVLNDAALRENWMDCIKTMSQRILDMRVGLRERLERLNTPGDWSHITTQIGMFSYTGLNRAQVEYLISHHHIYLLKSGRINMCGLNPSNLDYVAAAFNDAVRNIK*
>comp18231_c1_seq1
MDALEKAKPKDPFTVLPATTFDFDDYKRRYSNNPPEDYLPYFWEKFDQENC
>comp45778_c0_seq1
MGFEQRRRRWRWCVVWIGMVAMRVALATTTSASNTKQEQLVSRIAFGSCSNQSAPQPIWDAVVDFRPQIFIWLGDNIYGDIKRPFKLFGRERTVGPWKNVPRFVPSSEKEMEAKYRKAKFNPGYSRLQENAEVIGTWDDHDYGLNDAGKEFHGKITNQKLLLDFLDEPQDSPRRKQAGVYASYTYGPVGRDVKIVLLDTRYHRDPVGSDGTILGSSQWLWLERELKGPATAITIIGSSIQVISNLSATIRPLFSMESWGRFPKERDRLFKLIADSKRGGVFFISGDVHFGEITRYDCALDYPLYDVTSSGVTQSIEEVVPPFLHFLVRFVAWLTPSTMRVKGQNCRYRSCTYGQPNFGTIEIDWDSQPVNLKFKVRDKNGVAVTGVNISLMELQASNLETWDRVKAGHNQRHCTLEVSLPWIIRYRLAILFYFTLAVLLLAFLGLAYTAITVFRLKICKKKHD*
>comp536280_c0_seq1
MLAWAHWSPLPSSSIFVVPLLLPCFWNYTLFNFECLFLCFPFSHIIYLLPWT*
>comp39982_c0_seq1
MALIRYRDSSISPLIEHSIYMIIPKKKNVEKEKEPRLETKIRDTENHTHELESNNHRSHPFHRPTWESSKMSIKKGENSKIKLPGVCRGP*
>comp38989_c0_seq1
KVACSSHPKSAVATATQKVTELPQQRKRTKENPS*
>comp19185_c0_seq1
MLMLRAWQETLVVLLEVLHELMQSGQSGISIIISLRKCW*
>comp532000_c0_seq1
MQVLGELEKIDDDCDKHGIQFVKIDDPEAAQEYGIDDLPALVYFEKQIP
>comp234908_c0_seq1
MTTGNQNWSQKLINCLGRDLSERKRKSQRKHALKSSHRKWENKNIRIHLGFLGLQQP*
>comp47384_c2_seq2
MVPFKQEDAVMASVRVDGDVGRERSGVGIGIAMHEDLGLLSERLKNHGFVENDNGGAGGASVEEEVGGFNFGSIGHLGRRQGIMNITSTFDSRTQEVEGSLVARGD
>comp22894_c0_seq1
MGLDSEFSIRSTQESGLEPTRALPQGHCPQLSAFTLKEQVY*
>comp22161_c0_seq1
MFFFFFFFLNFPYTGTTTTARPYHCLATSRLATPPLGHTLLDHTHRSDTIPLTTTITLARPPLGHIALGPHHNPDTLLLRPQPSIGH
>comp53156_c0_seq1
MASSFASTASASPSPSPIATKAATNLRLRHSSNLSFRLSPKPKFRFFTKGSPPSQMLCPRVKAQLNEVAVDGSSNAASANKTKSEVEAVAAKDTKPASKPSSGVLATEESISQFIAQVVSLVKLVDSRDIVELQLKQHDCEVTIKKKEAIPQLQSPAQVAMIHSPPSLAVPPVSPAYTPTPAPTPPTPTPSTSPPAVKPAKSSHPPLKCPMAGTLYRSPAPGEPPFVKVGDKVKKGQVLCIIEAMKLMNEIEADQSGTIVDILVEDGKPVSVDTPLFVIEP*
>comp299539_c0_seq1
MSDSYFGLQRNPSFNDHFNSAELARKIESVILFIKQKLMVVILSTIDSYINRKIREPQNVPKQKVRPRG*
>comp30361_c0_seq2
MTNEKGSSKESKLIRYMKAPFRFLMKARDLYVQGMTECSQHFAYVDAAMGCPTGQLCTLPRSFSVTSTRSSASDDDFKELIRAASVRSHGNRLKLDAAAMTMPRSRSVGIGRIDEDKPCDFGDDIKVKPHIYPRSRSYAAHRRGAGVF*
>comp365619_c0_seq1
MLEYGEESIQVPRILVGKVIGKNGRIIQEIVDKSGVVRVKIEGDNEPEPTIPREEGQVPFVFVGTMESIANAKVLLEYHLAHLKEVEALRQEKLEIDQQLRSMHGANMGSMQNFPIQRRSDR
>comp450288_c0_seq1
MLSGEKIFSEIVDQAHAVLLVGGTLQPIEETRERLFPWLPPNELHFFSCGHIVPPDSVMPIAVSRGPSGRSFDFSYSSRSSPDMMRELGLLLCNLVTVVP
>comp40161_c0_seq1
MSLPEGENYIWFISNNFNVLFLGFCHQQLIYNHVLMGCVQLGDSYLNVMNLDSEVSMLFFLSKVSPSLSSLLLLVFSPPHLIVMCFSIALLTGPPPFLSLSL
>comp230811_c0_seq1
MQHFKVANQALQHIPLKWSKKFNKDANKNSIWQTALP*
>comp49377_c0_seq3
MMMSQLSNFLCFLILVSIFAVNLLLVCHVELSSASFLPALQVIL*
>comp49240_c0_seq1
MDPQPPPCSSNQDDDVFFDALDDCPFHHCAGDGDHPPESSSPATTIRRRSICRGSPDKESTGNLGFEDSCTESILINGAETSFLGNSKENENFPEKWESNEGKVCSFMATSGVNEEENEESTLTSAEANDDDAGGDSADSSSNFVEYVAGLMIGAVGFQIKVFIGFITYPMLFLFHACMFFVDPFGTMRRGRDFFMGILARVWGGVFEEHESFWNGAFRCGWGFLWSIYVCCILFALLVWSLVVSGFLMKCLVEKPIQIRQILNFDYTKQSPVAYVPIISCAAVGGGKDSENNIVVRKWVGERVISSKHKVQVTVSLVVPESGYN
>comp43463_c0_seq1
MPKIVLFSCPSRARRESKQNLIGLLNNMKKKNQEIFYKNKFKEI*
>comp48375_c0_seq1
MNLAGQLNEACAPPVSHKQVLFLLLCFAHRSINSLCFSSVSHAGESPAFISHGIAEDLLPSPMASSQLQSQSQSQQRSSSTIPMANPSGDNIDIG*
>comp537370_c0_seq1
MLHVSTIIFRRSYGSLVANPFRNFF*LSNEPKELSAFQKPPFSRLEKSFELLQFIFQFSLLLLDVSTVKVATVNQTMAQVRESGNGLMESRDLSTKPFKLLDETLS*
>comp20118_c0_seq1
MQGSGCDGETAKSVVEGVFSYLVQKGYFEVIMKLISLPENNDYYLRRTYGLESIPHLMNLMVSCSNRNLRVTWL
>comp166084_c0_seq1
MAEYLASIFGTEKDKVNCSFYFKIGACRHGDRCSRIHNKPTFSQTVLLQNLYVNPQNSAKSADGSHLVSNVSDEEMQEHYDNFFEDVFVECEDKYGEIEEMNVCDNLGDHLVGNVYIKFRREEDAEKAVNDLNNRWFGGRPVYAELSPVTDFREACCRQYEMGECTRSGFCNFMHLKPISRDLRRYLYSRRRKGGGGGGEASIGGGRPRSRSRSKGRSRSPRRSRDKRRRY
>comp23033_c0_seq1
MRFSSSLLQVIPPYLSTENRHPVSLMKKFSGKWWDRKSEKGESAFWRAGRASDSLP*
>comp17355_c1_seq1
MGLRLNFDNITEETLTWSINEILTNPRYRQQAKKRQLLFRDRPMKPLDEAIYWIEYVGRHGKVLQPASVRLPFYQLYLIDVIGTILLGVLLVGYLLKK
>comp59517_c1_seq22
MATSGGNGYRNGTQRSSLKVDKPISLNSNPKSHVKSKPLPPTSTSHRRNSTGSAPASVPGRVRVAVRLRPRNAEESMADADFADCVELQPELKRLKLRKNNWDADTYEFDEVLTEFASQKRVYEVVARPVVESVLEGYNGTIMAYGQTGTGKTYTLGRLGEEDTAARGIMVRAMEDIFTDVSLETDSVTVSYLQLYMETIQDLLDPANDNISIVEDPKTGDVSLPGASLVEIRDQQTFIELLRLGEAHRFAANTKLNTESSRSHAILMVHVKRSIKGRDAALSSENGNHPHMVKSLKPPVVRKGKLVVVDLAGSERIDKSGSEGHTLEEAKSINLSLSALGKCINALAENSVHVPFRDSKLTRLLRDSFGGTARTSLVITIGPSPRHRGETASTIMFGQRAMKVENMVKLKEEFDYKSLSRRLDIELDKLIMEHERQQKAFEDEIERLDTEAQHRISEAEKNYVDSLEKERLKYQKDYMESIKKLEEQLVTNQRKNEDSCMTSSGEITKVSAEELADLKKMLQKETLLRKAAEGEVNSLKNQVAELKISEASGKSEILKLHKMLEDEAHQKEKLEGEIAILQSQLLQLSVEADETRRQLDRGGSEKDVGGLDSLTSQVKRQPQASGNGEKPTIAKLFEQVGLQKILSLLEAEDADVRIHAVKVVANLAAEETNQGKIVEAGGLTSLLTLLKSSQDETIHRVAAGAIANLAMNETNQEHIMAQGGISLLSMTAANAEDPQTLRMVAGAIANLCGNDKLQAKLRGEGGIKALLGMIRCRHPDVHAQVARGIANFAKCESRASTQGTKSGRSFLIEDGALPWIVQNANNEASSIRRHIELALCHLAQHEVNARDMISGGALWELVRISRDCSREDIKTLAHRTLVSSPTFQAEMRRLRINY*
>comp26645_c0_seq1
MLSWLNLFHLLPCLFAFLWLLASVICLFFFFSFPKKKTKLIAFLNSEC*
>comp52738_c0_seq2
MKFTDSPVIELPVGDAVLSLQQDNGSMHVGTSVWPCSLVLVKFAHRWASAAAPNPYSHLLDFRSKRAVEIGTGCGVAGMGLFLLGLTDIVLTDIAPVMPALKRNLKVNKPVLGKSLKHSILYWNNLDQIRALNPPFDLIIATDVVYIEESVAKLVSAMEALLADDGVVLLGYQVRSPEAHKLFWELCDEVFAIEKVPREHLHPEYAYEETDVFLLRKKKKKQ*
>comp47964_c0_seq2
MSTLPKADSIQIREVWNDNLEEEFALIREIVDEYNYVAMDTEFPGVVLRPVGNFKNINDYNYQTLKDNVDMLKLIQLGLTFSDQHGKLPTCGTNQFCIWQFNFREFNIGEDIFASDSIELLRQCGIDFNKNSEKGIDVSRFGELLMSSGVVLNDGVHWVTFHSGYDFGYLLKLLTCRSLPDSQAGFFDLINMYFPLVYDIKHLMRFCNSLHGGLNKLAELLEVERVGVCHQAGSDSLLTSCTFRKLR
>comp289024_c0_seq1
MCLKYLIEENLVRGSILNAVNNKKHYLIFSISCADNAKHQKTGSLYVQQLNVITIKLSGIIFTASW*
>comp494135_c0_seq1
TSPFYLVLKCNLILKNRGGRDRTLGQVSYEF*
>comp47650_c1_seq2
MADYVLRVLSTKTQGVMLLGMSLCPAMTFSSTMSGQKS*
>comp397972_c0_seq1
MNINICSDNLPYFSYLLTTLAAAKNAKSTFEKLGVRRVEWELQQVRNIGILL
>comp44674_c0_seq1
MTSVPPFGQDLITSYVIQPTNPLNNTCHASPWTKYVICSTIL*
>comp42577_c0_seq2
MFTGDYVDEIFAVYCAYIWGWNRRRVSRVKVERSKENKGLRMIILAEA*
>comp57947_c0_seq1
MGVQQHETLSEDNEPDANARASSSLNQGDLVSVSVSNQSLNTESSEVNEPGDVSCKKSNTPHIYRQDVVKSNTSGMIGIVTEVAGDSDSDSDS
>comp42263_c0_seq1
MNYKSLQRSLHNCASLDQLKRIHALSLTLGLLPNLQPLACNLLQSYKNVGKPEQAQRVFDQIQYPDIVSWTCLVNLYLHAGLPIKSLSVFSHYLRKGLRPDSFLAVAALSSCGHCKDWVRGRVVHGMVLRNQLDENPVVGNALIDMYCRNGLVGIAVLVFEKMGIKDIFSWTSLFNGYILCNDLHSARHVFDAMPERNVISWTAMIAGCVKLGAPIQALELFKQMEAHGEIHTGADSMVAVLSGCADIGALDFGQSIHGRVKKTNLGLDVTVNNAMMDMYSKSGRLDLAIRVFDEILKKDLFSWTTMISGYAYHGEGHLALEVYSHMLESRVTPNEVTLLSVLTACSHAGLVVEGKVLFSRMIQCHCLKPKIEHYGCIVDLLGRAGLLEEAKEVIELMPISPDAAIWRSLLTACSVHGNLSIAQIAGKKVIELEPNDDGVYVLLWNMYCAANMWKEASEIRKSMRERRVKKRPGCSRVEVNGVVQEFLAEDTSLHVSAELCYLLKGIKEHSETDYFL*
>comp46098_c0_seq1
MVLDTSFIKRKLFGLQYTKGHKSKVTNDILKAKIP*
>comp324965_c0_seq1
RKEWLRIRTFKLKKAKILFQIDHK*
>comp55745_c0_seq14
MGGCCCSARKPHLHGTPVYYYCPPTLEERESLTSNDGTAASLTAGLLVGLNLEASTPDTYQPPPAPLPYEDLEEADGKALVNFGPISPRKPELSKSNESHALVTEEEDVCPICLEEYDVENPKTLTKCEHHFHLSCILEWMERSDSCPICDQEMIFGQTLN*
>comp181922_c0_seq1
MLKLQIIFKSLCVLSFFVSIMASWLLLLLPTWELFQG*
>comp56885_c2_seq5
MSLAIGVVSNSESMGFDEKGNECADVTARLPEMQYTGKTATEEESGDEEGTSLSRRRSESSITVTEDEDDDDERKIELGPQCTLKEQLEKDKDDESLRRWKEQLLGSVDVNSVGETLEPEVKILSLAIKSAGRPDIVLPIPERGNPNGLWFTLKEGSHYRLMFTFQVSHNIVSGLKYTNTVWKTGIRVDSTKEMIGTFSPQAEPYTHEMPEETTPSGMFARGTYSARTKFVDDDNKLYLEINYTFDIRKDWH*
>comp46116_c0_seq1
LKLKLIFTLLHKKKYVLFYLRAIPLSVITARLPITGYLIFFSF*
>comp48473_c0_seq1
MRWDQQSNNQHRRLLMFIYQYLDPVHLTGFSDDYLGGLWGEFSCVDQSSHITSSNMIWT
>comp44065_c0_seq1
MASLLRTPTFRPPRPSAAISSKPPKPSSCLPSFKQSTSPLTSLRLPNIPSLRFVKFVPFAFDSDSEAQQVQEPEVLDSLDGAVGVEDCKGDNEVTNVEETPASPFLMLLQSYKEA
>comp46062_c0_seq1
MESLNNKSKGYIEISQMESLFKASLSKAPSPSPTSQVSPAATHNLHNSDFCEEQEPMSRAEVLFRTYWRRAWIVLVWLLACFGLFAWKFVQYR
>comp53524_c0_seq2
MVARRFEVIHNDSNLDVDYDTDDGFEVFKFQLFSLTSVPPDQQKIYEAGRDTPLATDLDLTTISQKLRLVSIDEQEPEPESSSAHFFKSDEELARFLQAEEEELMLQQYVESEDTELFESRIRSYVDQVLMYEDVRRQEAARKTVPVEELEEEALVSLAKEGNFKPSKIEQDHAFLLQLLFWFKQSFSWVDSPSCHDCGNKTVSQGMTVALPSEAIYGASRVELYCCTFCSKPTRFPRYKDPIKLVETRKGRCGEWANCFTLYCRAFGYESRLIVDFTDHVWTECFSQFLGRWMHLDPCEGIYDKPLLYEKGWNKKLNYVIAIAKDGAYDVTKRYTRKWHEVLSRRTMLTEPAVSSVLTNITKESRRGFASQLLSMIEARDMEENQQLERSLHSEDDESLSLPGRRSGDEEWRKSRLEIGSEKNLMLISSACPVRLCIDEHVTRIYNAFRPVLYQFDREELTKSEAVEVLGIIKGILLDLFNSHFKTRRTSIDSVINNPKCQTILPSFDELLDALSLEKKVNTDGRVEICLAGNPVITSLALPVVLDALDDMIYNLNKCENFGKDSFVLPLLKLNRIHSGSVIASAEELPFGIATSAFDGIQISKWEEPNGARGCWIVYKTFDNKMYELVAYELMSANDAPERDPMDWILEGTNDEGISWQVLDKQTSQLFEDRFQRRTYMITSASLPSNLFRFRFLAVRDIQSTSRLQVGSIDLYARTI*
>comp52712_c1_seq2
MVQYLQISVGILHRNHAESITTFIKKSVDQELEDNSCSTQPPLKKRITLCVEGNISVGKTTFLQRIANETIELRDPVEVVPEPMNKCQDIGPDYFNILDAFYADPQRYECFQ*
>comp20170_c0_seq1
NPPLLQAATKETYTVNNTNSIGYNGYCK*
>comp285174_c0_seq1
MNKILHSITLITIMEAKKTKATHHSVNHTNKSLGLGVERWGYLHSP*
>comp57865_c0_seq1
MQKFHLGLAQNPSLMDASSLMSIQKTPFQDPPESCPKPYKKSFVTTLMEAATLRTPSFKEDNYFVSCLKSSEKKALQELKDKLVASDASDASMWGVPLLGGDDRADVILLKFLRARDFRVGDALNMLLKCLAWRKEFGADSIVEEDLGFKELEGVIAYMQGYDREGHPVCYNAYGVFRDKDMYERIFGDEEKLKKFLRWRVQVLERGINLLHFKPGGVNSLIQVTDLKDMPKRELRVASNQILSLFQDNYPEMVARKIFINVPWYFSMLYSMFSPFLTQRTKSKFVISKEGNAAETLYKFMRPEDIPVQYGGLNRPSDLQNGPPKPASEFTVKGGEKVNIQIEGIEAGATIMWDIVVGGWDMEYSAEFVPNAEGSYTIAVEKPRKIGASEEAIHNSFTSKEAGKMVLSVDNTASRRKKVAAYRYVVRKCSTI*
>comp56814_c0_seq1
MSLLSRFFYKRPPDGLLEFVDRVYVFDSCFSTEALPDGMYQLYLHQVVSELYEEFPESSFLAFNFREGEKRSQFAEILCEYDVTVMDYPRQYEGCPLLPLSLVQHFLRVCESWLSLGNHQNVILFHCERGGWPLLAFLLASFLIFTRLHSGERRTLEMVHREAPKGFLKLLSPLNPLPSQLRYIQYVARRNIAPEWPPPERALSLDCVILRAIPSFDSQNGCRPFVRIFGRNLVSKGGLSTQMIYSMHKKKKTLRHYRQADCDVIKIDIQCLVQGDVVLECVHLDLDPEREVMMFRIMFSTAFIRSNILMLNTENLDILWDSKERYPKGFRAEVLFGEVESISPPKAPTAILNGEEKGGLPIEAFSRVQELFSGVEWVGSDDAAAVWLLKQLAVLNDVKELSRLQGKESWYSSPADSEEENNESSTADSSDEAFDVIPKSSADPLKLLTSDTSDSVHLAFEKDGESYVNLNSRTPDQSLIDNVPSPHAPSNEYSPCSSPPSPSPVPAFQPLLPTPAPAPPPPPPPPPPPPMSNRGPPLALPPPPPHPPPPPPPRPSSSNQLTLPPPPSPLPPLPSNLSASSSATRPIQGARPPPSMGHNASNASTLPPPPPPPPPPPLGRNTNNATSPPPPPPRPIQPGSAPPPPPPPPPIDH
>comp42211_c0_seq1
MECALMGSNWNRCLIRSPHSSGPFFVASLSTTNRIRCSMKSYRLSQLTHSEVESLKTRPRIDFSSIFSVVNPIVDDVQKRGDAAVKEYTSRFDKAELDKIVELVSELPDPVLDAPIKEAFDVAYSNIYAFHAVQKSPEKSVENMKGVQCKRVARSINSVGLYVPGGTAVLPSTALMLSVPAQIAGCKTIVLATPPSQDGTTCKEVLYCAKKAGVTHILKAGGAQAISAMAWGTETCPKVEKIFGPGNQYVTAAKMILQNSEAMVSIDMPAGPSEVLVIADKHAIPSHVAADLLSQAEHGPDSQVVLVIAGDGVDLNAIQEELSKQCQSLPRGEFASKALSHSFIVYARDMLEAITFSNLYAPEHLIINVKDAEKWESFIENAGSVFLGPWTPESVGDYASGTNHVLPTYGYARMYSGVSLDSFLKYITVQSLTEEGLRRLGPYVATMAEVEGLEAHKRAVTLRLQDIEARQVSR*
>comp541313_c0_seq1
MRKKKKEEKNSITSFLLRRDLS*RALPNPLAFIKSVG*RI*CTWWVSDD**IRINDGKFYLHHHKTLLTL*QIN*LLYDHPS
>comp45638_c0_seq1
MAPHMEEVGVGAEYLAVLFSLLFSEPLSHLEKLLAQKLLGTDLKANNIDSRLSYLKNQFFAVHEIREKASGFGWDDENEKKMVTGDRSVYIERAKESSL*
>comp640_c0_seq1
MKDESQEQSCNVIKNTKCRSSKSCPPRPRANPQMHNVYHSTTVCLKNYITHSTQFYI*
>comp207680_c0_seq1
KYQLFRLSRLCYDNFQYYSINIIEEQPQIQFKHKKLEYSSSYVTLD*
>comp57422_c1_seq1
MAAYLLLGLA*N*FSFTSS*HNCYCTVPVLLLIG*TFTFDFIQIIF*L*Q*YKK*FCTSVI*FTMLHFN*
>comp44010_c1_seq2
MRPLISLQTARFAPCAVGGGRTRKVLVEVLYNIILEETDLTFMGGPPKGLNIQHIGKKNCFGGPLHPTPAPPRSATCVLAVSLRYSYYDFMCLQDLKCFVF
>comp5333_c0_seq1
MSSSLRHLQSRRWKTSHRHRHHRRTAAAAAERAASGLAEPAPADPQL*
>comp46978_c0_seq2
MLTYIFFLFWLFHKCFYLKWLNCNPTSLWFLKRS
>comp211146_c0_seq1
PFHTPSLNPISDIPINLPIRNSCLLLLGTSFLSFIFLSLSLNGRIF*
>comp57981_c0_seq40
MFVEGNEMTKSERSIASQHSSDKMTHLDFFKKFKRFNPLEPSLGIVGFFLATLLFIGCFFYLDYRAVIKGLRSRGTTLLGLHISSLSSASPLVGAAPVQFLGQDGDKCDVFDGNWVWDESYPLYHSTNCSFLDQGFRCSENGRPDTFYTKWRWQPKDCNLPRFDARKMLEKLRDKRLVFVGDSIGRNQWESLLCMLSSAITNKATVYEVNRSPITKHTGFLAFKFEDFNCTIEYYRSPFLVVQGRPPPGAPKEVKMTLRVDHMDWTFPRWRDADVLVLNAGHWWNYEKTVKMGCYFQLGEEVKMNMTTEDAFRKSVETVINWIASEVNMNKTYVLFRTYAPVHFRGGDWNTGGGCHLETLPDLSSLPVVSDSHFKTVFDVLSEHMSKSEVMNLDLLNVTQMSLRRKDGHASIYYLGPDKGTAPMQRQDCSHWCLPGVPDSWNEILYALLLKRETFRERNTTKVSQ*
>comp53784_c0_seq1
MITPKSFFIAFCFCILSLVLLGINAIEVSHDGRAITIDGKRRVLISGSIHYPRSTPEMWPDLIKKAKEGGLDAIETYVFWNAHEPARREYDFTGNNDLIRFLKTIQEEGLFAVLRIGPYVCAEWNYGGIPVWVHNLPGVEIRTANQVYMNEMQNFTTLIVDMVQKEKLFASQGGPIILSQIENEYGNVMSTYGDAGKAYIDWCANMAESLNIGVPWIMCQQPDAPQPMINTCNGWYCDDFEPNNPNSPKMWTENWVGWFKNWGGKDPHRTAEDVAYAVARFFQTGGTFQNYYMYHGGTNFGRTAGGPYITTSYDYDAPLDEYGNIAQPKWGHLKELHSVLKSMEKSLTHGNVSDTDFGNSVKATVYATNESSSCFLSNTNTTTDATVTFRGNTYTVPAWSVSLLPDCETEEYNTAKVNVQTSLMVKEENKAEDEPMSLKWVWRPENIDDALLGKASASANSLVDQKRAANDASDYLWYMTRLDLDQNDPVWTDDMSLRINGSGHVIHAFINGEHIDSHWATYGIHNDKFETNIKLKPGKNIISLLSVTVGLQNYGKNYDKWHAGLVGPIEVVGRKGDETILKDLSSHKWSYKVGLHGWDNKLFSENSLFASASKWESDQLPTNRMFTWYKTTFKAPLGSDPIVVDLQGMGKGFAWVNGQCLGRIWPSYNADEDGCSAEPCDYRGEYDDQKCVSNCGKPSQRWYHVPRSFIQDGVNTLVLFEEIGGNPSLVNFQTVTVGTACGNAYENKTLDLSCQDRPITAIKFASFGDPQGVCGAFSNGSCESKDALSIVQNACVGKEACSIDVSEKTFGPTSCGDIVKRLAVEAVC*
>comp49949_c0_seq1
MPKKGMRNIFFKPSPSVSPSLPPSSPRRTFSDSIIEENIEIARSLITKWDPISPQSSSYAKVTPLFSGTRQEAKQYLNAIKKLQSAMQYLVAQDSTSEKLVQAQFLMQVSMKRLEKEFYRILAESRDHLDPESVSSRSSTDQRSSVSDYDEEISEDEFRVAGDSVSDTERISMVAVADLKAIADCMISAGYSKECVKVYIVMRKSIVDEALYHLGVERLSFSQIHKMDWEVLQLKIKCWLNAIKVAVGTLFYGERNLCDHVFGAPEKKIAESCFAEICREGAMLLFGFPENVAKCKKTPEKMFRTLDLYEAIYENWPQIESIFSYESTSTIRSQAIASQVRLGEAVRAMLSDFESAIQKDSSKTPVPGGGVHPLTRYVMNYITFLADYSGILADIVADCPKSPLPESYYRSPDREDNSSSEISERLAWLILVVLCKLDGKAELYKDVALSYLFLANNMQYVVVKVRKSNLAFLLGEDWLTEHESKVKEYVSKYERVGWSKVMPSLPENPTAEQSRACFQGFNAAFIEACRTQSSWVISDPKLRDEIKVSIASKLVPRYREVYEKCRVGSDLVIRFSPDDLGNYLSDILHGMGHSSSFSSHSSASSFSSHRFRRT*
>comp41461_c0_seq1
MKQALNSYMSSFPEDTQAQRTCFSESNPLSNVGFAELLALADAAWAHSNALHPGNNDGLRKPSILSLKSQFLGDPVTNPTNTLLSHHHLSLEQRYIIHDNSQESQGTSNIAFCSKRTSQVTPPTPDNA
>comp56948_c0_seq1
MDKSWITNPRNTSEYMKGLLNFLDFAFVNGSSDNRIKCPCSRCGFRIWQTREEVYDHLICKPFPQGYTVWLLHGEKDRGEASSSIPVTQHSLPLEDPMQDMIHDAFDFSGYHVDEESPTSSGPINDGEGRSLHLSNGPSGEAKQFYDLLRDGEQELYEGCSKYSKLSFLVKLYHIKCICGMSDKAMSMIVELLHDAFEHAKIPESFYEAKKTINKLGLNYTKIHACPNDCMLYRRLDKMRQTCKQCGTSRWKSKTKGNSTNVPKGAKKKKPQPAKVLRYFPLIPRLQRLFMSYKTSSDMRWHAINSNEDGFMRHPRDSEAWKKFDLTFPEFSSDARNVRLALTSDGFNPFGNMSTNYSIWPVVLIPYNTPPWKCMKQTSFILSMIIAGKRKSGNDIDVYLQPPIDELKQLWDGVETFDASSNETFNMRAALMWTISDFPGYETLFGWNTYGKLVCPICNIDAEPCRLHHSKKWCCMGHRRYLNTGHKFRLDKVRFDGKVDKRNAPLQLSGSDILKQVENIQVSFGKMPEVEVRGKRGRGQQNAKGESHYWRKKSIFFELPYWEFNILRHNLDVMHIEKNV*
>comp49816_c0_seq1
MPRLIIANKTEPSDHRISHLLAKEDKRERKKTNASNYSNYNNSNKGSYVNIMSTKKFGRSTGTISCMEF*
>comp16562_c0_seq1
MAPAGPPSNPPITDPVVLDAPLIIASPFFLSPNAMWTPPLMWPTTGKPSATSSRL*
>comp121704_c0_seq1
MQTTSIILEFIYFCKTGVYCLRSQFNIRILCGSVWAINLPPTPKVTHLYVLINTSTYLRHHVTPVFFECYPNYVETIYGFKLNAAKPWPILFVIGC*
>comp55520_c0_seq1
MGNVWIQLVLFSFWHCRSADEVREVLRKYTKMTGCKTKRVGRVFSYRRWLSLIFLVNDLGV*
>comp53052_c0_seq1
MPEIINCVLNIVRFSKNTSKLAFLSERVLSLGFDVISNVLETGPGWRLVSPHFTTLLESAIFPALVMNEKDMLEWEEDTDEYIRKNLPSDIDEISGWREDLFTARKSAINLLGVISMSKGPPMETATDCLSASTKRKKGQKNKGSNQRRSMGELLVLPFLFKFPIPIPSDSNASQKKILNDYFGVLMAYGGLQDFLREQEPGYVTTLVRARILPLYTLTVSLPYLVASANWVLGELGSCLPEEMSADVYSQLLMALVMPDKQETSCYPVRVSAAGAITTLLDNDYMPPDFLPLLHVIIGNIGNDESESSILFQLLSSIMEAGDEKVAVHIPHIVSSLAGPVSKWLTHNLEPWPQVVERAFAALAVMAQTWEDSKPEESESNESSEKWAAGQAAIGRAFAALLQQAWLTALCTLDQQDQHSPPSSCIEDLSTLLQSVMLSINGNHMIQELRVSELLSVWAEMIAGWHAWEESEDLSIFDLIKEVVKLDRRYRLKNFLVKQMPSPPAPPVPERSIVEGIGTFISEAIKQYPSATLRACSCVHILLHCPTYSLETEGVKQSLAIAFSRAAFSRFREVQSTPCSLWKPLLLAICSCYLCYPDVVEGILEKGEEGGVAIWASALCHVSNRSFEDGLTAESEMKLIVMTLARLIEQLLGQGKSGGDSMQNCFTSLLEVSVRLKEVQDGKGDEQEAEEVENDDEDEDSDNDDLEDYDEDSEAEEYEETEEQFLDRYAKAAEALENGSIVEEGDVEDQELDTELGQLIDIDEQKVVLSLIDKYQNVLIQGQVLPSHLIMNFLNAFPGYGLYFQQYR*
>comp53374_c0_seq1
MLRIKSLKRNPAYVNPRLPTTLLQDFVLFSGASQHSSFPSSGVRTFLFRHHHHHH
>comp46540_c0_seq1
MLLLPRRSTKLHF*LTVHFLHLLSL*SIFVFWPCTLKN*K*FF*TTKQLLLISQNGQRGSSKVTRNDKFWFKITFLTKKEQNL*SKRF**ITQTFCKHTITCPSTQKLQIQ*PNNVTNIKTKYQIIE*QLAEYMPSIPFLQCKLNIE*
>comp32019_c0_seq1
MWKDVPYVGYSQELTSAQNKVKKSDKSFCNENTSRHISGSSMICWSCTEPRKLSEHGSGVMKIFNFHLLVR*
>comp178808_c0_seq1
MNVHLWYKKKTIILDAVVKSENAPELTFICKFQVNNYSTPRTTRHLEMVKNYASTEKGRVD*
>comp45041_c0_seq2
MAETGIIVRFPGSLDPRAEEFRPRNPTHGAQPQPVTLFRPTHTQPCYPYAPLPFCDAAVAVGVPYPNYFAPSAYVSPPAPTAAVAPLSTSPTRSLVLSSVPSELVISESALRRELEVFGDVRGVQMEGLRDGMVTVHFYDLRHAEMALTAIRRQHMQHQTRLRNHYASLFKSRNSF
>comp40125_c0_seq1
YSSDVFFSLSFFQGIRLCFHLFLTLHLSRRFLRKYKRTIRNLDFIIVEAGR*
>comp476077_c0_seq1
MFKRYWREFNRHTPLFSVWIFHGVVSINGWVWSTIFHTRDIGFTELMDYLSAFAMVFSSVYCLGMRLLLDVAKDSYGAFLTGICVLFYLNHALYLSSGPFDYSYNLV
>comp298728_c0_seq1
MPEVQLKNSSKLCKSSFIPLHFLYSSIHVDPAYWPGRLVQHKCTMSSKALKIVSVLWLSQEQ*
>comp58967_c0_seq1
MGLKVATTCLQWPQPVLPHSPSSSQTLASAISSPSSKRTSRGGSNGGGAGALVCRMMHRSSLLGGAQSTRLSRSRSFEHPLPTTRRTIRRVCSASLESFSDEEFAKKMEDLALRFQFSDDNDTDTNEMDSDSEVASYAGDYKVNCNSFSEVSSRVNIPRLDTIEPPWMEIPQEPPDWNGGDEIIPANIERKANSVELPFSLRIIKKKLLWKEGFREAGESAYCSVKKAFSSMVFIIQELHSFTLQMREVLFYEDLQGILARVQQEMHASFVWLFQQVFSHTPTLMVYVMILLANFTVYSMGHNAAIAATAQPPTVTTEIISTSEIQDQKNQKFDSSTIKAFSVSSSGGRTASVDGGSGGGGKFRSMANGTDGDGRSDRYHRTVLPDGGSTLGTTGETESVSGQEEEEASLWNYMVEEAWNMQMGSRREALDHDTMQRFVSPVTASIESDNYAEYLRTELLYQTGLSQESNNSLLLANYAQFLYLVVHDYDRAEEYFKRAIRAEQPDAESYNKYATFLWKAKNDLWAAEETYLEAISAEPTNSYYAANYAHFLWNTGGEDTCFPLASPDTSQEV*
>comp118090_c0_seq1
MKRSESTRARRSWWERSPTRKEAFMALLGKFYVRLTSSFLVRSVGVMRRGPLGWMSIIYAFFFIDCPEPELVSWLGL*
>comp43173_c0_seq1
MMTTTTTMMVKNLEDFYVLDRRASEFIALRPRREKRKNVRTKILPGTRSRPVLTVLKALHQGTQETQTRYFRLLKPNQLRREKEIR**NLGL*RIYSMLSRATTQCVPVLAKTEAIFSLQKQRNDYDTRC*
>comp293445_c0_seq1
MAQGHMIPLVHLARLFAARGEHVTIISTPSNAKLFAKFIEHDRVNSGHHIHIHTINFPSKEVGLPEGIENMSSVTDNDSAAKICTAAHLLQSQVEAFVEANPPHVMVTDMMFTWSASLGIPRLVFNGVSIFVACMTNAINRHPQALSYDHLADGISSSAFVVPGLPHPIPLTVKPS
>comp544195_c0_seq1
MLNAIFIYLFSKKGSLFTKTEIQQRLLISHIPNNWLEMLRDGSTPPESGMPVLRLIVN*
>comp54736_c2_seq4
MEMQDQIEGTRSNNSGTASSCHSNVGTQSENVVRVGDITSVGNNLTPKVRKPYTITKQREKWTEEEHQKFLEALKLYGRGWRQIEEHIGTKTAVQIRSHAQKFFSKVVRESDGSAESSRQPIDIPPPRPKRKPLHPYPRKSVDSLKGHSIMNEPEIYPSTNLLVAEKDTQSPTSVLSAFGSEPFGSAFSEQTNRCLSPNSCTTDIHSVCLSPAEKENDCMTSNSSEEEEKGSRASIPLTTGSNPHLSMKSEFSSKKTECFKEDAANIAHVTSIKLFGRTVSMVGNQKSLNVDEENIEPITCKSDEVDNVENEKHSQAWPSDQLGAQLSLSMCNSNWHITPDGAKVKCIEHPKENMCFGESTPDASLPWWSLYQGLPAFYLGPCNQILNPRPLRPSLKVRTGEEGSSCTGSNAESVSDMENRGKNSDTVDSQPSHHEEGIVPQKSARGFVPYKRCLAERDANSLIVALEEREGQRARVCS*
>comp40463_c0_seq2
MSSSEAAATTTKGGRGKPKASKSVSRSHKAGLQFPVSRVARYLKAGRYAQRVGSGSPVYLSAVLEYLAAEVLELAGNAARDNKKTRIIPRHIQLAVRNDEELSKLMGSVTIANGGVLPNIHQNLLPKKVGKGKGEVGSASQEF*
>comp57953_c0_seq1
MCFKLERLKPAPSLQSQILISTSQPTNHKMNHLTIDTEDSFASLLELAANNDVEGFKRSIECDPSSVDEVGLWYGRRKGSKQMVNEQRTPLMVAATYGSIDIMKLILSLSDADINQPCGLDKSTALHCAASGGAENAVDAVKLLLAAGADPNSVDANGHRPVDVIVVPPKPEYVKNSLEELLQTDDSIARCSNLRVITTTLNAYSPPLSTSPEIGSPSAPDFQLKFKSNDAPVSSASEKKEYPVDPSLPDIKNSIYSTDEFRMYSFKVRPCSRAYSHDWTECPFVHPGENARRRDPRKYHYSCVPCPEFRKGACRRGDMCEYAH
>comp48382_c0_seq1
MKRKTGFVSQDDVLYPHLTVLETLTYAALLRLPKSLTREEKMEHAEMIIVELGLARCRHSPVGGGTALFRGISGGERKRVSIGQEMLVNPSLLLLDEPTSGLDSSTAQRIVSALRRLARGGRTVVTTIHQPSS
>comp48246_c0_seq3
MADQQSGRISTHFRAAKPLLPRKRASDSSTFRCDQSPHQIKNAGEVDGLARVSVTKRVPLAEVPLNTPSAFSKNKLSAIGNDCGPFDAFNCSLSARTVAAPVVPAENPCQSYFETPRKEPESSEPLDYFSTNGLLDDDFDDSILEQIDILCEQKSAEKAVGQELDHSFHEKVLNESNIIGDVNPSLVSTTASKGIISGDLLSYGVDLDPNEKQMDTQQSIQSGIMPEEYLKYLQSLNDRQREAACTDISTPLMIVAGPGSGKTSTMVGRVLMLLNEGISPSNILAMTFTTAAASEMRERIGAIAGKATAKELTISTFHSFSLQLCRSHGEKLGRTSEFLIYGQGQQRNAIVEAIRLLENGKSRQKDGALLIGEMSNSLTSPKQFKDKAKKWQKFVTQAKASGRTSAEYRKVGNEIGAEILENYNNILKSCNALDYHDLISCSVKLLTDFPEVFKECQDSWKAIVIDEFQDTSAMQYNLLRILASHHKITIVGDDDQSIFSFNGADISGFISFRNDFSNYKEIRLNKNYRSTRYIVEAASSLIQNNTKRCQLKNVLTDNSSGSKIVVKECHNEDAQCAFVVDKILEISANHSAANCSYGNIAILYRRQISGKAFQMAFRDRKIPFNIHGVAFYRKKVVRTIIAMLRTVLPGCDDGSYNRVFKALLPFEKDQKKRVIDHINKISTIRKCSFLSAASDIFSAKISGTFKRSQLTHGRKVLMTLEMISKLVQREKSISAIITCVANMIPEKYLLEQRATIDVDGGALLNEDYDIRSVRQYLLDDVSEFLSTKFVEVKGEREISEDKGCIYVLKAFIDYLFEREKENFRARRKDNENSVTLTTIHQAKGLEWEVVFIVKANESEIPLLHDFKGTVKDTRALVEEERRLLYVAMTRARQKLFILHVMMDSHWQMLQPSRFLKEIPHHLLEVQGEINIQVQIEQEAFQKENAQCIGDLLIKEQQSEADVLPMPNNLLKNHFSEASNELAEIAEANNGSNFLRRFNVEDRSVVSHLFHQWAKKKAFQDPRRLLGKVGFVIDERIRQKTNKNKDLLNALKSCLSSDEAFQYAQYVLRWEQIPADKRAHLMMEKQEHFLKLRIESAMGSATPTVKQISYLKKLGCTMTPTSRLHASHLIEQYKSL*
>comp17960_c0_seq1
MFGPDRSPYQGGIYHGKLVFPREFPFKPPSIYMITPNGRFKTNTRLCLSISDFHPDMWNPAWSVSTILTGLLSFMLETSPTLGSVETSEEEKRQLAYRSLSHNLSDAQFCEQFPDVVQDIKEELTRREKLEEEARRKQEENRLNGLNTSHADTTTSALQS
>comp575980_c0_seq1
MFKKPHANGRTQTRKAVSNGKQDSITCVW*
>comp54406_c0_seq17
MKLFGTIVYPKNRYLTLQFSRGGKSVMCEDYFDNMIVFSDAWWIGKKEENPEEGRLEFPKELYEGQQAEYDFKGGAGAASVVNQGVPKTRIQLAEQDSPKTPIEDDLSGSESNSKDTREVVPVRHSERTTGKAYKFAEISSGGDSGESSPGLSEHEEKVIQKKGPRSVVVDIDNEDAAEGAQLPKENKECASGSKSRKVSQFASATASKEVVSSNRGSLVQATISTLFKKVEEKTAPRNSRKSLSSKVSGQKLQPAGAKRKIDLDEGSRKRARKIKDKDRGENIMTKSKECEKLNQRLPLQYDYLVLLNISRK*
>comp59939_c1_seq8
MPVHQDGSCNGLQHYAALGRDKLGAAAVNLVGGDQPADVYSGIAARVLEIMRRDAEKDPQTNPNALLARCLINQVDRKLVKQTVMTSVYGVTYIGARDQIKRRLKERCAIEDDSQLFAASCYAAKTTLTALEEMFEAARSIMSWLGDCAKVIASTNQAVRWITPLGLPVVQPYRQIGRHLIKTSLQILTLRRETDKVMAKRQRTAFPPNFVHSLDGSHMMMTAVACKNAGLNFAGVHDSYWTHACDVDEMNRILREKFVELYEAPILEDLLEGFQKTFPTLNFPPLPERGDFDLQEVLESPYFFN*
>comp179152_c0_seq1
AQSIKFSSLYNAVYHFTKLF*
>comp116419_c0_seq1
MPRTWLNPERPHRSSAGSSPPHRSICLVLEVSANQGGLFPRQPSSAQSSKYNNNESSGISLSVQAPPTYATPLMSLYAAKLKSSSTGSS
>comp51106_c1_seq1
MFCSHYVRCIFSSSYQCLILSQLLSSNSSVNNFFCSKIPYLF*
>comp3617_c0_seq1
MTPSSPTTSSFDEDLARHMFDEGAANVSAADEPHHVPDPETLRIQAAKWFDEVMTSLGTENVEPPILLVSSSRHEWNLRFSLS*
>comp434162_c0_seq1
MNTQIYSDKSFSIEMKSCKAILKSILFLMNRSSIQNNNKNMKTI*
>comp1990_c0_seq1
MYSHLLPFYNLMRMSLSPQQHCYDDVLFSIVLKACSELRDLVQGMKVHCHILKAKAPDSFVLTGLVDVYSKCGHIESARLVFDEIIDRNVVSWTSMIVAYVQNDCAQEGLTLFNRMRQGFIAGNQFTVGSLVVACTKLRFLHQGR
>comp148872_c0_seq1
ENIIKIHGYRLKYKTSISPQLYDLKHSNVYYGIT*
>comp150857_c0_seq1
MSECPKSKTNWHWRLIKLTKKSMMRGGWKQSNALIQKTSTVN*
>comp484416_c0_seq1
MGSYLPTFLRNQSLEEAKGLVSGQKHSVNHQDLLDLVIELTALMIQVKSLSENDRNTYEVEVLSTSMDAIKK
>comp152794_c0_seq1
MEINFFGLIDVTRIALETMRDKQTPQGGLIQQVTSIGGQRGVPTFSVYCASKWAVEGFTEALSQELKPEWNISLTCIEPGGFRTDWAGRSMQFAERHPAYDHIDAKTQMQKRNGTQVGDPKKGAKAMYEFAIMDKPPLRSVIGTDAYSAIMDKLKKYDENQKKYEQLANSTNVDEEKK*
>comp35325_c0_seq1
MCPKIC*SQFPIPKPLNRNSEVPSCKRDTNLK*NLSLKFEPLTSFQNSHRHLSPAASRLRFFSSENRRRLQMLVAFLKL*
>comp33824_c0_seq1
MVLTRICNGLRRKKALELPTVVVKNTFASDASFTTKPFKLHILTEGPKTEASVNSEDALKFYRQMQAIRRLETAAGNLYKEKIVRGFCHLYSGQEAVAVGIKSAMREQDSVISAYRVHGWTYLMGIPPAGVLGELTGRFGGCAKGKGGSMHMYAKNFYGGNGIVGAQVPLGAGVALAAKYLGNGGVCFALYGDGASNQGQVFEAYNMAKLWDLPCVFVCENNGYGMGTSGERSSASTKYYSRGDYIPGIWVDGMDVLAVRECARYCIDYCSSGKGPLVVEAATYRYSGHSMSDPGTSYRTRDEIQEVRQTRDPITSFKEKILSAGLVTQDQLKEIDGAVKKEIDAATDRAKNDPEPAAEELSTDIQKHFLEGDIRNCTPFNALKHRNVNKQFIQSS*
>comp56818_c0_seq1
MGCLLNERERTLFFCCGMFSFKTQMRKVNVWDRFRVLTVWKTRMNINIYYDINLETLGCASEWVEEHQFEKLLRLYSLVYGT*
>comp51259_c0_seq1
MSKEVKDLQQLKYMDKEEAPQIPRRTTRSLASSSASTSNNALAAKVISPEPLTINDLVVGGDPISLDDLISSFPGRRSQILEIVHLLGPLNSPILPLFVYGGASAGKTSIVLQLFRHLNRPLVYSSCRTCYNQRILFESILNQLLLHKKNAANGYSNAKRCERPSDFVNFLREALTNVINNLKEKSEKLISNKMAQGGIGNMIYLVFDNFQLVREWDKSSTILPLLFNLYDLLKMPEVGLIFISSTSPDTYYSNMGYVEPIPIYFPDYTEDDIRQILLRNQANQKLYSSFLDVALRPFCRITRQVDELSTAFKPLYEKYCEPLSDQGVVPSEDMKRRLFSHIKPHITSSLNEIFKVLSLPSAEVETCKETKRKGNPKKLEHSEEIAELDFHMSTSAKYLLISAFLASRNPATLDASFFDSKGGSDNRKRKRKPSEKALEQKESLEEELLMKGPGTFPLERLLAIFQCIVSVAEDPSDEEEQRNDGLGVQGGNGGLMSDVLLQLSSLCNANFIFKGRSCPIEGSTRYRSTISEDLALKVARSLKFPLSKYLYRR*
>comp398266_c0_seq1
MVLSFTTHRYVLLCFNRWLKNLFFLQKTKHLMTYLFFHSKSLTRIAFFFSGKIKFWRGEALEFSYLDFT*
>comp234768_c0_seq1
EKSLTEEPQVEEDEDEEEDIYKGSGEDTGSDSDSELTAKTLDSFKAHVPVPSQKEVEEAILLKKKQELLDRYAPDADEGESEP*
>comp51464_c0_seq1
MSSPDIAGILENSKELDKLRKEQEDVLLEINKIHKKLQTTPEVVEKPGDTSLARLKLLYTQAKELSDSEANISNSLISQLDALLPPGPQGQPRRRIEGNEQKRKRMKPDSDISRLTPSMRNQLEACASLKGEQVAARVTPRNADKDEWFVVKVIHFDKESKEFEVLDEEPGDDEDSSGQRQYKLPMGNIIPFPKSNDPSSAPDFPPGKHVLAVYPGTTALYKATVVQGHRKRKTDDYVLEFDDDEEDGSLPQRTVPFQKVVPLPEGHRQ*
>comp24078_c0_seq1
GNHYGFSSYFLLLGEFETNVHGIYIKHASI*
>comp43949_c0_seq1
MNQCWTRIGNTSNFLTIFSIPLFPKWIDVIRRFAETTE*
>comp47792_c0_seq4
MENLHKGIARARHGFNDIYRREVGLSHPSGFARRFSASEALVKNMDLYGKLNGHEGCVNAVEFNSTGDLLVSGSDDRQVMFWNWASKTKLFTYPSGHVDNIFQTKIMPFTDDCRIVTSAGDGQVRLGLLWEDGRVDTTMLGKHHGSVYKLAVEPGSPHILYSCGEDGFIQHFDLRNSSATKLFCCSSSTGNNKQPPSKIGLNSIVIDSRNPCYFAVAGSDEYARVYDIRKCQWDAARNSDRPVNTFCPRHLVGSNNVHITGLAYSRLSELLVSYNDELIYLFEKNPGLGSSPSSATPEDLKNLQEAQVYSGHRNAQTVKGVNFFGPNDEYVLSGSDCGHIFIWKKKEAKLVRLMVGDQHVVNQLEAHPHIPILATCGIENNVKIWTPSASGIPPLPVNVKEIIEANRQGREDRSRVTLTPDVIMHVLRLQRRQTLAYIERRYNRADIVSDEEDEEGFLLGFSDGDVSSEEDSPGNSRDCNIS*
>comp555554_c0_seq1
LRPPYLLHTLKRPEVHRYYLSWPHYLSTLQYLIDIR*
>comp36019_c0_seq1
MQVEHHFFCITGKRHCLITENQEVMLGSFVMARAERKNQTSVQITPESRQKFRHYRKR*
>comp311959_c0_seq1
MFWPSAVYESFGGFCGSLFIVGSGLSTLETSANPFIATCGPPRLSEFRLELSQSFQAVGSVVAPLLAARVFFKQTDNTDLSKVQWTYVGIAAFVTLLAVVFFFSPIPE
>comp343_c0_seq1
TLTQSLLQISEIGTQPSKNDILGTNIKLNSKVSKSV*
>comp43424_c0_seq4
MKEKKSVNCNHKLIIFYSHHGYCRISTNLKSLARPKKKKNTNKNEMKFPRKKLKIPRSYQ*
>comp59168_c1_seq1
MASHFNQPGAQRDSDKAPMIMNPLSEISPSPSPSSATAPALVLSNSGKRIDQAGKKKYVKQVTGRHNDTELHLAAQRGDLVAVKQILDDIDSQIMGTLSGDDDLSAEIAEVRACVVNEENELGETALFTAAEKGHLDVVKELLKHSNKDSVSKKNRSGFDPLHIAASQGHHAIVQVLLDYDPGLSKTIGPSNATPLISAATRGHTEVVNELLSNDCSLLEIARSNGKNALHLAARQGHVEIVKALLSKDPQLARRTDKKGQTALHMAVKGQSCDVVKLLLEADAAIVMLPDKFGNTALHVATRKKRVEIVNELLLLPDTNVNALTRDHKTALDIAENLPLSEESSDIKDCLARYGALRANELNQPRDELRKTVTQIKKDVHTQLEQTKRTNKNVHNISKELRKLHREGINNATNSVTVVAVLFATVAFAAIFTVPGGDGKNGRAVVATYAAFKIFFIFNAIALFTSLAVVVVQITLVRGETKAEKRVVVVINKLMWLASACTSVAFIASSYIVVGRKNEWAAILVTVVGGVIISGVIGTMTYYVVRSKRSRSMRKKEKQLARRSGSNSWPHSDSNSEVDRIYAL*
>comp54567_c0_seq2
MEVPLVNDDTMIDDETEDLNGEMLPSESESEEDVKLTTPSKNAVYNRDALLDKLGDISWPENVEWMHKLSIDIDQEQEVDVNDDLARELAFYTQALEGTRQAFEKLQSMGLPFLRPADYYAEMVKTDGHMEKVKGRLLAEKRKMEEAEERRKAREAKRLAKEIQAQKLKERAKQKKEDIESVKKWRKQRQQSGFADSANDADKDFDFEDGKVFERSKKKRPGVSPGDRSGGKAKQAIEKGKKQKKRDSRNSRFGFGGKKGLKKQNTADTTFNLSGFKKGAVTGNKKRKR*
>comp49618_c0_seq2
MSKNKVLVVGGTGYLGQHLLQAYAETNGSPYDLAFTHHSSPPPQPLLDAIPGSLAFQVDLKSGNGLDAVSDAFGQPDVVVNCAAISVPRACEIDPAAALAINVPSSIVKWLQSFKESSTLLIHLSTDQVYEGEKSFYKEEDIAVPVNVYGKSKVAAEQFISENCSNFAILRSSIIYGPQTISPVPKSLPIQWIDGALAKGEKVEFFHDEFRCPIYVKDLVTIILALTSQWISEGKQMQLLLNVGGPDRVSRVQMAEAVAQFRGYDTSLIKSVSASSVDRGVKSPADISMDITRLVETLKIYPVSFKNGVRLTLTAEAKP*
>comp100318_c0_seq1
MGQFSHHLAVLPFQCNAHFVVSPTIVRCLGGYAASPAMLWFMEPTL*
>comp54973_c0_seq2
MALETWLIKVKTALSSSFDSVRISNPKLLKKQSSKSKNVGVLAFEIAGVMSKLLHLWQSLSDSSIIRLRNDAVSLEGVWKIISNDESFLLGLACAEFAESLRLVANSVSRLSHKCHDPSLRSFHHLFHEFADSGRDPHRWSLTGSKEIEAKLKKMERYVTLTATLHREMDELSVLESGLRKALQHCSDGEACSVGKDQKICDLQQKIFWKKQEVKDLKERSLWSRGYDGVVSLLVRSVFSVLARIKLVFGIGHCVPCLSRSLSASAAVYPSDQNPTSCNAFVSGPLKSSKLEEKEDLGTGFFESNCKLLKPPPSTLGASALALHYANLIIVMEKMIKSPQLVGVDARDDLYAMLPSSIRSSLRSRLKGVGFSACDPVLAGEWRDALGRILGWMSPMAHNMIKWQNERSFEQQNLVPKTNVLLLQTLLFANKEKTEAAITELLVGLNYIWRFEREMTAKALFECTNFNGLLNLQKLS*
>comp49391_c0_seq1
MIIDINGAMMAFQAKAHLFFLCLLIFSFSSILAVPKEQELDRISALPGQPRVTFSQFSGYVTVNEQHGRALFYWFTEATTSPENKPLILWLNGGPGCSSVAYGASEEIGPFRINKTGSSLYLNKYAWNREANIIFLESPAGVGFSYTNTSSDLKTSGDKRTAQDALIFLIRWMSRFPQYKCREFYIAGESYAGHYVPQLAKKIHDYNKENPHILNLKGFIVGNGVTDNYYDGVGTVTYWWSHSMISDQSYKSILKYCNFTEEKTSKKCDDAVSYAVNHEFGNIDQYSIYTPTCTTSHNETVRHIRLKSTILHRISGYDPCTEGYAEKYYNRREVQKAMHANVTSIPYKWTACSDVLIKKWKDSAVSILPIYKELIAAGLRIWVFSGDTDSVVPVTATRFSLNHLNLTIKTRWYPWYSGEQVGGWTEVYDGLTFATVRGAGHEVPLFQPRRAYILFRSFLAGKELPKS*
>comp54666_c0_seq1
MRTSYYLLRGRFRHSEQYLSSWSSIVKPSLRFSDLSDSSQHQLSQPSSSSSHSQLCGIFAAPLTSRRFLLLGLLGLDRHRHLHNHQYSSHRSFLTRAKQSKNIEFNDRHSQRAVTTALWCNFLVFSLKFGVWFATSSHVMLAEVVHSVADFANQALLAYGLSSSRRAPDAIHPYGYSKERFVWSLISAVGIFCLGSGATVVHGFQNLWTAQPPENMQYAALVLGGSFIIEGASLIVAIQAVKKGAAAEGMKLRDYVWRGHDPTSVAVMTEDGAAVTGLAIAGASLVAVNITGNAIYDPVGSIIVGNLLGMVAIFLIQRNRHALIGRAMDDHDMEKVLQFLKNDPVVDSLYDCKSEVIGPGFFRFKAEIDFNGVMVVQNYLKRTGREEWAKQFREAAKQRDDTTLLKIMSSYGEEVVTALGSEVDRLEKEIQNLVPGIRHVDIEAHNPTDTIL*
>comp46083_c0_seq2
MGHSNVWNAHPKNYGPGSRACRVCGNPHGLIRKYGLMCCRQCFRSNAKEIGFIKYR*
>comp44041_c0_seq4
MLIQIPRLTNSLRDPFDVDQAYLRRKTILQNLRPRNSATSLDESELARKIVYEWEEASSEVRQAYKQFIGAVVDLVDGERPSEEFHEVALTVYHLFSRPIEEDDSIDRIISDKKLELQKLMGHAVADANLRKVASLAQRLLNLQPSNKKSSFSSERNLDANDDLEFGADFVFQAPARFLIDASLDDGDMLDFKSTVPLAFHEGPYGHTDPTDHSVVDREKFNLTWLRDACDKIVKNSISQLSRDELAMAICRVLNSEKPGEEIAGDLLDLVGDGAFETVQNLILHRKEIVDSIHHGLLVLKSDKNASNAQSRMPSYGTQVTVQTESEKQIDKLRRKEEKRNRRGTEHAGDGDLSAPDFSSLLQASERKTLFDEMIGSGDRSQSIAVTALPQGTVRKHFKGYEVVIIPPKPTAPMKPGEKLIEIRELDDFAQAAFRGYKSLNRIQSRIFQTVYGTNENILVCAPTGAGKTNIAMISVLHEIGQHFRDGYLHKDEFKIVYVAPMKALAAEVTSTFSQRLSPLNMTVRELTGDMQLSKNELEETQMIVTTPEKWDVITRKSSDMSLSMLVKLLIIDEVHLLNDDRGPVIEALVARTLRQVETTQTMIRIVGLSATLPNYLEVAQFLRVNPDTGLFFFDSSYRPVPLAQQYIGISEQNFAARNELLNDICYTKVVDSIRQGHQAMVFVHSRKDTVKTAQKLVELARRNEDLELFSNNAHPHYSFTKKEVIKSRNKDLVELFEFGMGVHHAGMLRADRGLTERLFSDGLLKVLVCTATLAWGVNLPAHTVVIKGTQLYDPKAGGWRDLGMLDVMQIFGRAGRPQFDKSGEGIIITSHDKLAYYLRLLTSQLPIESQFISSLKDNLNAEVALGTVTNVKEACAWLGYTYLFIRMRMNPLAYGIGWDEVMADPALSSKQRSLVIDAARALDKAKMMRFDEKSGNFYCTELGRIASHFYIQYSSVETYNEMLRRHMNDSEVINMVAHSSEFENIVVREEEQNELEMLARTSCPLEIKGGPSNKHGKISILIQLYLSRGSIDAFSLVSDAAYISASLARIMRALFEICLRRGWCEMSLFMLEYCKAVDRQVWPYQHPLRQFDKDLSAEILRKLEERGADLDRLLEMEEKDIGALIRYAPGGRLVKQYLGYFPSIQLSATVSPITRTVLKVDLVITPVFIWKDRFHGAAQRWWILVEDSENDHIYHSELYSLTKRMAKGEPYKLSFTVPIFEPHPPQYYIHAISDSWLHAEAFYTITFHNLPLPEASTAHTELLDLKPLPVSSVGNSAYEALYNFSHFNPIQTQTFHVLYHTDNNVLLGAPTGSGKTISAELAMLRLFNTQPDMKVIYIAPLKAIVRERMNDWKKRLVSQLGKKMVEMTGDYTPDLMALLSANIIIATPEKWDGISRNWHSRSYVTKVGLMILDEIHLLGADRGPILEVIVSRMRYISSQTERSVRFIGLSTALANAGDLADWLGVEEVGLFNFKPSVRPVPLEVHIQGYPGKYYCPRMNSMNKPSYAAICTHSPTKPVLIFVSSRRQTRLTALDLIQFAASDEHSRQFLNMPEEALQMVLSQVTDQNLRHTLQFGIGLHHAGLNDKDRSLVEELFANNKIQVLVCTSTLAWGVNLPAHLVIIKGTEYYDGKAKRYVDFPITDILQMMGRAGRPQFDQHGKAVILVHEPKKSFYKKFLYEPFPVESSLREQLHNHFNAEIISGTICHKQDAVHYLTWTYLFRRLMVNPAYYGLEKAEPEFLSSYLSSLVQSTFEDLEDSGCIKMNEDMVEPMILGSIASQYYLSYMTVSMFGSNIGPDTSLEVFLHVLSAASEFDELPVRHNEEKYNEALSEKVKYPVDKNRLDDPHIKANLLFQAHFSQLELPISDYVTDLKSVLDQSIRIIQAMIDICANSGWLSSSITCMHLLQMVMQGLWFDKDSALWMLPCMNGDLISLLGRSGISSVQELLDIPKAALQTVTGNFPASRLYQDLQHFPHVKMKLKIQRRDTDGKRSYTLYIRLEKINSRRHSSRAFVPRFTKIKDEQWWLVLGNTSTFELYALKRVSFSDQLVTSMELPTPANLQGMKLILVSDCYIGFEQEHSIEEVVGCQPIAGL*
>comp16974_c1_seq1
MQIACHPSFLICLVISSTFFLVSTKMIDLKPISFPISLRRLESFASFSCSSRISMI*
>comp353161_c0_seq1
MIFYRYHKKSNRFILFFFFFEQQASLFLFTLAISAT*
>comp45752_c0_seq1
MPYYPCIPLLHTCRGRNDIHLGIFPLSDWPKRCYGCIKQLSCTILGGGLGLGRGNISFHKLIEPLESLNCPVLNLLHIFVKFSVLN*
>comp42410_c0_seq1
HLNPRQSAKRKSIIHYARLNISSNFEKEKEKKSVWVCCKH*
>comp33082_c0_seq1
LDFGDYCHKCGAEHPHGLFLRSPSTVRVFLFSSTLQLFPLLALAYLSYLCPLFVVCTLYSDIIDLHLGCSSVFSGGIPQPLQVEPLTLTRYKDEDFLSNSTIPVFPFDKILHVHHDKDSTSSS*
>comp44941_c0_seq1
MT*WSTYLSITITRPIKRHS*SRKSSLISKTDISS**S*TQI*QNTKKNS*IANYMPFEPHNYKHHPKPVTFHSLHQKTKRLQYDVSN*
>comp216831_c0_seq1
SELALLELEPCCGIQSSNVLFSVHVSVLFNWLCTCTTLF*
>comp52188_c0_seq1
MALLRNLLSRRFHSLLNLNPQNPLWTSSYSYILHPNTPHSLKIPPFPHRPITFSPQIEDPVDSEPDTKQNNKKRPLHALFVEAVGLSEKTRIIETETEEGETENKELKKTLRELEGEVRSFKEKAKKSVPKGRSLHDVFTNQPAAAADSVTTRKDVKRRKPVVMKELSPDMEIFVHHLYKKGYFKDANFAKDKKFDLSWFESFYARGYIKFAAQKFAADNQEIAKWLSGSALKQVAMFGCPLVRRCHVFPAKRLRKFFEIPENTVCSKCMLQQSCKFVNQSVWKGDTNNLDMAVVMKIITSYALESVDPQLVVPDEVNKSVSQLMKEVVKLSQTT*
>comp2795_c0_seq1
DQSTNKPPIRNEKKAEDNFYFFSFLIILSLHTLLPHFSS*
>comp202008_c0_seq1
MHEVEIFHKSLRACLVYFLFLFLDRCIFIIITK
>comp611338_c0_seq1
DGNICNLRLLVENFVESSVCYDLICTISNRLT*
>comp14772_c0_seq1
MNSTEFTQKTI*LNETDKI*IRSPLFFSHYYCVVFGVQFVLSSIFLQRI*VSLVLQLHVKVTISEMHSSGMQEEPNEHLQNKDLKQMMYTVSWDRILAL*
>comp93576_c0_seq1
MYNLPRITELLIFERIDYTNQKVNGGKLQPSVETLGCKLCQLKLYGGRLPKIK*
>comp44597_c0_seq1
M*LI*FL*QQLHSLSCGSYL*ST*IFSSFFNN*YHSLTDVRIK*GNWKR*LFHYPLYSKSEAYIEIYALKKQ
>comp359142_c0_seq1
MKTHIDENLYNCYICGFKATDYETLKRHVLTHTGEKPFACDMCEYKATEHILKIHKMKYHNKYNQQY*
>comp203149_c0_seq1
DYGYAIELCLDTWICFLNEFLKYVKSLSVYNSSLLGFYDFT*
>comp51833_c0_seq1
MAQEPVLFEDILCQIVDMIGPENEGYVTLRDVKGSKLSGNVFNILFNLNKFIGFETRDPFLIRQEREDPNLTDWDRFAHREYIRLSMEEDGEDMSNASGDVWEESLEAPF*D*FGASKAMDVCAS*
>comp210379_c0_seq1
MPGSGLGPGDSSSDFRIASIGNVCTSFNVLKLRLPRRPLSSHPQEAPADSFSYIFMQISPTFSVHFACPEIVPKSFQQCLFFGYLRFQFFFLGK*
>comp45995_c0_seq1
MESEALVSSEKEQQQGASYTYWVRKITEDAAPLPAPQKLTPEDVLPCQSQPATLGSVWNRAGTWEEKSLNGWAAPRIKELLISVGSIQFSFGRAEVEDVTKCVGDAFMVIVRNKKRVGYTYQLTLKVKGEWIIQGEKKLIGGHLDVPEFSFGELEDLQMEVSLSEGRDLLHQDKIEICNDLKLFLQPIREKLLQFEQELKER*
>comp25615_c0_seq1
MIQLVIKSKFHLHVYSCKDPEILLNLIRPSNQLNFQVPLWVKPQNYFLLQKVRSNSWVTSTFLGPNVILGGTHQKPKHPTSSPLSN*
>comp352966_c0_seq1
MLRKIWPKAHKEQAVHWITIHPSGRLALSIGADKTIKTWNLIKGKHAYTTNIASVTPRPEFIEWSQCGEYFGLVYGTNVD
>comp414811_c0_seq1
MHPTAPHAIKYKCMRKVNWLLTITRKCIISKRQHTPYLFPSQRLHFHVNVFTHTRSKASTRRFSIVQSGI*
>comp21011_c0_seq1
MASMLFLFPPIPILQYIILMILIQMPPYLSSYDYHTSCANLYGCGELTNIGFPFWGDERPNGCGHPLLHLICDDKGLTYITIKDVRYQVL
>comp299525_c0_seq1
MCLNVLFGVIHSKKMVYTIVLFLITKLRIERSLTNLRIKGVVANL*
>comp279081_c0_seq1
MFAMLMYVPNIIDSATILVNGSMYSRPQHPPMEHNFFHHSTIPFSTKMWNSNMNDDEATATENTIAP*
>comp176728_c0_seq1
GSYYKGLVRYLLSYLGAILKLIQTHKNENDVKSSLVKSFLWKGK*
>comp58270_c1_seq55
MIGNCFGALNWCKGRDHPSGQPHEQVIATRKFSYNSLRSATGDFHPSSKIGGGGYGVVYKGVLRDGTQVAIKSLSVESKQGTHEFMTEIDMISNIRHPNLVELIGCCVEGSHRILVYEFLENNSIASSLLGSKRKYVALDWPKRAAICRSTACGLGFLHEEAQPNIVHRDIKASNILLDVNFNPKIGDFGLAKLFPDNVTHISTRVAGTVGYLAPEYALLGQLTKKADVYSFGVLMLEIISGKSSSKAAFGENLLVLVEWTWKLKEENRLLDIVDPELTEYDEIEVFRFIKVALFCTQAAAQHRPSMKQVLEMLSKEVHLNDKALTEPGIYRWHTSTKMGSSLNESSSSQVIKYKKPENPDGTSTHFSGTDIVTEMVPR*
>comp53046_c0_seq1
MGFDENKETGQKSEAAREYEEHYKSEGEPLSRQASESSIYATDQEEEDEDGTKIQLGPQCTLKEHLEKDKDDESLRRWKEQLLGSVDMNNAAEILEPEVKINSLSIVSPGRGDIVLPIPESGNPKGLWFTLKEGSHYRLKFTFQVSNNIVSGFKYTNTVWKAGIKVDSSKEMLGTFSPQPEPYTHEMLEETTPSGLFARGTYSARSKFLDDDNKCYLEINYTFDIRKDWA*
>comp47861_c0_seq1
MLLRRTTTLLFSNTLNGQLLRHLLTTTTDTPQPSSPVNPDDLLRVCTVLYQQQNSPESRLHSKLSSSCEFQLTHEFFLQVCNNFPHSWRPVYRFFQYTQAHPRFDHTSVSFNKMLDVIGRSRNIDLFWHVLGDMGRLRLVNDKTFRIALRTLGHARELNKCVEFFHLMNSNGYEYNLGTLNKVVEMMCGCSRLVEEAKFVVFKLREWIRPNGVTYKHLIRGFCDKGDLVEASKIWNLMADEGFNPDVDAVEKMMETLFKVNQFDEALKLFQIMRFKRMDELGLSTYRLVIKWMCKKGMISQAREVFEEMRERGIQMDDLTLGSIIYGLLTKRRVREAYQVVDGIDVPDISVYHGLIKGLLRLRRASEATQVFREMIRRGCEPTMHTYIMLLQGHLGKRGRKGSDPLINFDTIFVGGLVKAGKSLEATKYVERVMNRGLEVPRFDYNKFLHYFSNEEGVFMFEEVGKKLREVGLVDLADILERYGQKMATRDRRRNRAPIVEDTSNE*
>comp480335_c0_seq1
MALMCNFSSEQTILILCSLMYTSLFYFVNIIEWCSFFHG
>comp31430_c0_seq1
MSCSLSYVNCDILQLRRHMLDYNSKLCMLFSGLLRCFIKLIKLINCVNLCLY*
>comp1476_c0_seq1
MKKKSSLEERKQKEEQTRKLANEAKLANNCHKILAYLFLLNL*
>comp57363_c0_seq1
MKTGSDWIDSCSKEEMKTYQEWFNLADSDGDGRITGNDATKFFALSNLSRSQLKQVWAIADTKRQGFLGFIEFVTAMQLVALGQAGYELNSDILKTEIDEENIKPPVMEGIDALVAKTKSLTINAQPEGNGTTQLQPFPPNPWVASKSVKKLPLNAVTSIIDGLKRLYVEKLKPLEVTYRFNDFVSPFLTNSDFDAKPMVMLLGQYSTGKTTFIKHLLRCDYPGAHIGPEPTTDRFVVVMSGPDERSIPGNTIAVDADMPFSGLTTFGGSFLSKFQCSQMPHPLLDEITFVDTPGVLSGEKQRTQRSYDFTGVISWFAAKCDLILLLFDPHKLDISDEFKRVIASLRGHDDKIRVVLNKADQVDTQQLMRVYGALMWSLGKVLNTPEVVRVYIGSFSDKPINEGFVGPLGQDLFEKEQNDLLADLVDIPRKACDSRINEFVKRARSAKIHAYIISHLKKEMPAMMGKAKAQQRLIDNLEDEFGKVQREFHLPAGDFPNVEHFREVLSGYSIDKFEKLKPKMIQAVDDMLGYEIPELLKKFRNPYD*
>comp54907_c0_seq4
MDSATPPSPELHLDNLRAIKVLGKGAMGTVFLVHDTTARRSPMALKVVDKSSIHAKPDADRRARWEIQVLSRLSHPFLPSLLGTFESDQLLGWAVPYCPGGDLNVLRHRQTDRVFSPSVIRFYLAEIVCALAHLHTMGIAYRDLKPENVLIQHSGHVTLTDFDLSRKLTPKTIKTVISSSSLDDSKLPDTRRKHRRKFARWIPVAPPDTCHHSKKGLKKANSARVSPVSRRRPSFSNGERSNSFVGTEEYVSPEVVRGDGHEFAVDWWALGILTYEMLYGTTPFKGKNRKETFRNVLVKAPEFIGKQTALTDLIRRLLEKDPTRRLGYVRGAREIKEHEFFRGVKWDLLTEVVRSPFIPSTDDGALAGQLTAGPGRGGGGMDIRDYFQSLKSPPSLPPSPLPSPSPSSEFQRNVSLTEF*
>comp46537_c0_seq1
MEPWFKSHAYCDFSFFLFVLLENRCHGSILLMQVSHFLLLYFICHFLSLVSLISLSVSSPPPP
>comp379210_c0_seq1
MCTCQLLVWLNMHVVVRDFDFKKSDTEQHLKNHKHTCQP*
>comp304094_c0_seq1
MILLVNISIKWLSFRHPCISILERFYIFSYCIP*
>comp134490_c0_seq1
MRIWVRSESDALVALTQIFKVPGVTLNNAASAMLFAKPLHISVQDNSMEYASSKRKDNSP*
>comp52619_c0_seq1
MEGDDETSGPMIDEIYANGGDEEEKRSRRPIISGDQLDIEACGNLYSGRTKIMRLLFIADHCDKNSTMQLEALRMAYEEIKKGENTQLFREVVQKIDGRLGPNYGMDVAWSESVDRRAEQRKEKLENELNAYRTNLIKESIRMGYNDFGDFYYAHGQLGDAFKSYVRTRDYCTTSKHIIHMYMSAILVSIEMGQFPHVTSYVSKAEQTPEALDQITVAKLRCAAGLANLEAKKYKLAARKFLETGPELGSHYNEVIAPQDVATYGGLCALATFDRTELKNKVIDNLNFRNFLELVPEVRELINDFYSSHYASCLEYLGNLKANLLLDIHLHDHIETLYDQIRHKALIQYTHPFVSVDLHMMANAFKTTVAGLEKELEALITDNQIQARIDSHNKILYARHADQRNATFQRVLETGREFDRDVSSMLLRSNLIKHEYNLRGLIRKL*
>comp53331_c1_seq1
MDFIRGLPKAQGKDTILVVVDRLTKYAHFIPLCLPFTAKDVAEIFLKEVVRLHGFPASIVSDRDKVFLSNFWTELFRMADTKLKFSSAYHPQSDDQTEVVNRCLEMYLRCVTSAKPKQWPKWLSWEEYWYNTNYSSSTKLTPFKALYGYDPPVLLKGTTIPSAVEEVNKLIAERDEMLAELRANLLKAQDRMKSQADKHRREVQFQAGDWVFVRNLYSE
>comp40338_c0_seq1
MGHINPWEQFHGLNVVYTWILLMARAAPQVRRRINTKTLIQDTLTLQSTVTMKVQDTALFVFLGTILSCGLVGF*
>comp37459_c1_seq1
MSLHASMEDNFPSEKAELRWLQVEDLRSLIRIRDFISLVLAYPMRIEEDGILKKWINDVFEFNAKHSKEIESFLLEMQFLNFWRKAKKPEAFQRIKFLLSEKPLRYVEGLIPEDMISQIKHGWRSISNDNETIIPEAIFNLGVDLAVKQLIETLFSCEDHVHARNIHHVRLSTRNNIEKGVVVRKIAAALKDEDNMLRLKETFMGVLLIDVSKYSANEEVIQVQQKMAQELEIVTTALEQTEDEEVLLTKRIEAEMMWKKYLVFLVDGNGDKKLDPRKMGFPKSKLAGVVVLITNKSSAPGHDDLLMAMDLEIRTEDHLLPWELFCRNVGSELVHSSSAIQSIAVHIVTECCGHILAIVLVA
>comp34307_c1_seq1
VITCISTWPAAAKGGVTPTVLFTAQGFRWSTVYKYQASNSGQIFELT*
>comp31321_c0_seq1
MRNKLTPTFSSGKLKGMHSQLVDCGGALLGYMKEFEDGKPFEARDVITRFTMDVIASCAFGLNLDTINNPENGFRRMALSIFTPSLRLKIFMFIRGVAPWILPWVGSLLRKGKSGDKNFFVDAVEGTLEYRKENKVERQDFLHLTNELKLRDLEMIKNKEIDPNSPFIFDHN
>comp44339_c0_seq1
MTNLKPLTLIFFLQAVLAMISIPASHCRTFLPNDEKQIENTCKKTPNYNLCLQSLKANPGSSGADVTGLAQIMVKVMKAKANDALYKIHQLQRGGAGPKQRRVLSSCADKYKAIVEADVPQATEALQKGDPKFAEDGANDAANEATYCESSFSGKSPLTKQNNAMHDVAAVTAAIVRLLL*
>comp31455_c0_seq1
MNRIEYSTLANSTEIKCGKVGFHIELILEITYSNF*
>comp177579_c0_seq1
MLTYMNLNTMGVSRDAQLRALKLLDVVLEGDGRQIFEFGYTTMRDRWIRLKQILSKSKRFSLQKLAPQYCSFFKRVRDPSPAYAWVKCERQEDKNC
>comp31788_c0_seq1
MAMFCHGNSIEVLIHRSTTVIHLLQIHSLFLKSALDYHPNFITQFISSASSISAPYAKSIFYELPIVPPLFAWNTIIKAFAKTPTPLESLTLFRQLQRYGLWPDNFTYPSVLKACGRCSWIGHGGVVHSLTLKMGFDSDRYIGNTLLKMYVDCGSVEFARQVFDEMTVRDVVSWSSMIAAYVACNSPSDALNVFQEMKLANEKPNSVTLVSLLSACTHMLNISAGESIHSYVTRNCIELDVALGTALFEMYSKCGQIEKALQIFNSMPKKNLQSCTIMISALANHGRQKDAISLFTQMEDIGLQPDSLSFSVILSACSHMGLVYEGKKYFDQMVRLYDINPTVEHYGCMVDLLGRAGLIKEAYDIIKSMPMEPNAVILRTFLGACRNHGWVPSLDDKLLSKLESGLGENYVLTANIFSICGSWKNANDLRLAMKQKGLKKIPGRSWVEVQNFYACANRL*
>comp59555_c1_seq1
MFSFLDPMRVLSRRSEGAPSRRMLVVTGSSQYAYRPLTWTSK*
>comp28967_c0_seq1
LNFVSQAKFLFFFLGGWIFLVDFVSSIVHILGFANLLPYTLQYP*
>comp55935_c0_seq1
MAMASATATTLCLTPSPFLKPKPTLSHSSSLSPLLLHSRSLLPFSSSTIRTTTPHAYVTGPASDPIFGDPLDPKVDGSPEKPMPPSLISWDLLWVLLMKHKLRLAVSVVALFACTTCTLSMPIFSGRFFEVLIGARPEPLWSLLSKVGILYALEPLLTVIFVINMNIVWEKVMSTLRAQVFGRILIQKVEFFDKYKVGELTGLLTSDLGSLKDIVSENVSRDRGFRALSEVIGTIFILFSLSPQLAPILGVLMLTVSVSIAVYKRSTLPVFKAHGLAQASMSDSVTETFSAIRTVRSFSGEKHQMFTFANQVLSYQSSGIKLGTFKSVNESLTRVAVYISLIALYCLGGSKVKAGELSVGTMASFIGYTFTLTFSVQGLVNTFGDLRGTFAAVERINSVLSGVQIDDSLAYGLERELKQKAVDDENYKLFFSTAEKNQKKYLHYMSALKTSSNLFSLAWSGDVCLEDVYFSYPLRPDVEILRGLNLRLKCGTVTALVGSSGAGKSTIVQLLARFYEPAKGCITVAGEDVRTFDKSEWARVVSIVNQEPVLFSVSVGENIAYGLPDDNVSKDDVIKAAKAANAHDFIISLPQGYDTLVGERGGLLSGGQRQRIAIARALLKNAPILILDEATSALDAVSERMVQDALNHLMKGRTTLVIAHRLSTVQNAHQIALCSDGGIAELGTHFELLAKNGQYASLVGTQRLAFE*
>comp34800_c0_seq1
MPKFFQVKENHRKTLRIDYAKFGTETEETHMLTQYPINIYEIVHMPGNFLCLD*
>comp618280_c0_seq1
MFVPKKNGDPRFVINYAPLNDIIKTRVYAPASDEALRQRISKAHWYTKLDIRDGFYH
>comp19900_c0_seq1
MYSKFFCPSTDHIYHVLAFAIPTSSWNS
>comp289497_c0_seq1
MTKCNFYIQYNSDKKIIIILLHKLRVSFYFLCSYIDKYLPLS*
>comp58218_c0_seq3
MPLKNIIRRRLLSLLQPWLREEPELDLRLGFLHSHAVAKNLRFDVSVLNQLFDYPASLFFKDLTVERLSVRFSTWYTPAFTIEVHGVHVVQSFEKPEEEGCARRLRTSKYDCSGFLRKNLSVLDPEGCSLHHLLERILFAVPARKDFTISFWNLILKHCHLEAQRIHMEVQFPILNDEFMCFGEIKEFSAKSKYLDRKCLLRGFLSTIFLPMKESSYILNGIGFKVRFIEKNHTDRVLLSSDMCTFIKLSDLKLADCTLCFPELAFSCSPDDISICLAFDKLLSNKYNHARSARELWRIAACRIGHVTATSRLSLHRLVGVMGQWIHYVNAYENLLLLIGYSTGHLWKNSISKMSQNKLILSSARHCWEVISDIEIKLPVEGIALARRIARHRAALKVPSDCYEECMTTSNFLRPFLFILALIWKVILKIILCLVNIFFGRKMVQDPDIDGTEDPCQRCCFVLNFGKIIITVSQINEIQPSVYEKLQSHTGIAYSDFHSICLCIDALLLVSVAHIFDQRFFLSCGQMKVEPAPLTVSPEASTMNMRSSAKGNGKECVNDMEPILWVEPAKISPHSEANAAQAEDFCDSHMESFMRKFSVSWEGIYNNFNESEIEYSENPCLLCKVEISSTYPGLKHPDFGFCECGLMLGKLNLVLGHSSVSSVSLLISQIQHAICWEDRREASIASKFEDKTENAWVNKYEGYAKGLIMALLQKLPEKHIHFGVFVDGPSVRFLHRREANLGGQDINDIVSQDNFDLICDFHEIEVVVGSPSLFDMLPLTGQLGLGDAKAECIKLEPQVIEIPKPNNEYASSGKISIGSYLCLNGLNGCLEKSAEKHQIQLLELKPITVQISSFREYTYSLSTTMSAFSAALDITAGGFTVFSFLDEVYMIYKVVSSLFSVVSYIFSSFEAVDCIHPEIMKREALFAERESSEAIIRGALLTNNICPFFINGTCRFKPVDVILHNSRTSDNVESCTRKFDYMTGNKLAEQKLPDCGIWISIQQTTIVISCEEGKMDLHTDLSGIMSLVFKYQNSIGNNTDHIVLENLLLQSVNCLHEISLSGCTFTVCLGPVQNTSSSGNESKTPGSSNSDGNISYLVQEANLTVSERSSNQSPRLVKKIGSPTNISAPAAPASESYWLLINIAVSNVFIGRCSMKSDLVQAHQLNKLLSFLSIGGEFQMISWEIQGGLIVLETTSLAMVIDGYSSYLHYVGNLTFDAQQPDKDIMKAEHGKGSYNINDENDQETVCTSQQAESGLPDAFDLSLSHFALVFVLQNESDCIREIVLEVDIHLKFELATTGKKLTIDLSRLSILSQILHERVEYETEIPHFSSVTSKDLSSHLASADPLSGFQKFNSVSDASSSRDPVPVHLSHQNQILKDLRAFMSLERPENGSLHLSRCWSGIGSLSGFDMTLSVSEIQTILSMASPLSELSSQKTIRELERNHWPTSHEFDNSLEAMIPNGAIVAIQDVNQHMYFTVEGEEKTFSIGGVIHYSLVGERALFKVKHCTQRRWKSTVLWFSLISLFAKNDMGVPFRLNCRSGSCFLDISCTNDGGCALWRVYPPQGDSYEGVTDWEACNQSVKRTFYLVNKKNNSAVAFVDGAPEFVRKPGNPIKFKVFHDLSVAYDVSETASYPRMAPQTSLHIDAESISWHGGKLPRIDIKIEKISLNIVHELSDTQDLFPLICLCINNTQLIIQSLATKSRVMGTSSAVVHYFDAQRNLWGDLLHPVEICIFYRSNVQTQLSEYASHAVPVNFYCRTKELDISLNENSLDLLLFIIGKLNLSGPYSLRSSVILANCCKVENQSGLNLLFHFNQQSVTIARKQSASILLRRLSDLKNQDSEASTSVSIQLADSGSLSTSSIHLSLSQAQNLAWRTRIMSIEGSRTYPGPMFVVNISRNSEDGLSVVVSPLIRIHNETGFSMELQFQRPQPEEDEFASVLLKPGDSIDDSMALFDAINFSGGVKRALMSLSVGNFLLSFRPKMTEELINSKSSLSLEWSAYIKGGKAVRLSGIFDKLNYRVRKALFAKSVKCSFSTAHCILKSEGVCVANMHFLIQTIARDIPVALPEKSAGVLKNENSPVSLQEQKEIYLLPTVRMTNLLHSEIDVLLSETDQSNPVGYDNIGKQASISCGSTVDFYANPAVIYFTVTLTASNSSSKPVNSGDCVKKLMKQNNDVQHLDINLNFDDGEKFFATLRLYRGNRGMLEVVVFTSYSMKNDTDFPIYVLATKRRPLSRIELDNLNSSIPLELGLCLPPKSTRSWFLKSKKVQLKLLEDHTSEALLDLDSLSGLTEISFKKEEGSGVKSVTKLGVSTGPSSGEIVVPSQMVTLVPRYVICNESEGCITIRQCYFQDEVAGAISIDSKQRTSLQLKEGFSKTREFNVFEHFIRKHRSSSDNSLLYIQIQTNEPGLGWSGPVCIASLGHFFLKFRKQTNEVTISDSNMTQFAAVHVVEEGSTLVLRFYKPPNLGLPYRIENCLHNLSITYYQKGSLEPEVLGPACNADFVWDDLTLPHKLVVRINDSLQLREIKLDKVRAWKPFYKLGQQRVLAPRLLLDKRSGDQMASFSELNGMEMAKVGYEIYAEGPTRVLRICEISDSFKRDTVLNLCAKIQLRVSQFAVHLLEHAKQEGDENGSTDFAPIVVAKLGNLHMITVSNNHQKYNQFSVQYMNLELKWNGAPFASMLRRHQLDYSDSNDSVLKVVLVLLSSSSNVKQFRYSSIFLQPIDLNLDEETLMKIASFWRTSLSDSESQRFYFDHFEIHPIKITANFIPGESHSSYSSAQEALRSLIHSVVKVPPIKNMVVELNGILITHVLITMRELFIKCAQHYSWYAMRAIYIAKGSPLLPPDFVSIFDDLASSSLDVFFDPSRGLANLPGFTLGTFKFISKCIKDKGFSGTKRYFGDLGKTLRSAGSNIVFAAVAEISDSVLKGAEANGFNGLVSGFHQGILKLAMEPSVLGTAMMEGGPDRKILLDRSPGVDELYIEGYIQAMLDTVYRQEYLRVRVIDNQVILKNLPPNHSLINEIMDRVKEFLVSKALLKGDASTTSRPLRHLRGESEWKIGPTVLTLCEHLFVSFAIRMLRRQANKFICSIKWEKQSEVGNHAADSSQKVQKVNFIRKWGIGKFVLSGLLAYIDGRLCRSIPNPVARRVVSGFLLSYIDQNDDE*
>comp49330_c0_seq2
MHTNHPKKTESTKKIKIINSALHKYTQCRPVLHCEKPSKKLRTFLTSQIRNE*
>comp21035_c0_seq1
MLFLQHCYFNIVLPIYIEMYCDANVWITICQYEVHADVLTCNMINEMTVTLCYSSMTLLLVWICQHHFVRSHLLVMSYETLFIFQKMANDKKIDNALKYNGPLPW*
>comp349793_c0_seq1
MTTNLAKCINSVLKGTRHLPITALVQSTYYKLAEFVC*
>comp11436_c0_seq1
MHIPVSFVLNYSCWIYKIIHDLTSNNLKF*EN*SLA*Y*KLYD*DTSGLDH*HLSL*PR*GITVVALQNILHYYGFGIM*
>comp15150_c0_seq1
MELQEKYMVNVVSCLRVGPFYLVKSFFFPGPSVVHRLRNLQNDI
>comp44414_c0_seq5
MAASEENSALFPIFILTIMAIPIVPYTITKLCRAAAKKSKSIHCQCSECSRSGKYRKSIFKRISNVSTCSNLTLLLLWVVMIILVYYIKNMSREIQVFDPFSILGLEPGAPESEIKKKYRRLSVQYHPDKNPDPEAHKYFVEFIAKAYQSLTDPIARENYEKYGHPDGRQGFQMGIALPQFLLNIDGASGGILLLWIVGVCILLPLVVAVIYLSRSSKYTGNYVMHQTLSTYYYLMKPSLAPSKVMDVFIKAAEYMEIPVRRTDDEPLQKLFMLVRSELNLDLKNIKQEQAKFWKQHPALVKTELLVQAQLTREFAALSPSLQSDFRRILETAPRLLEELMKMAVIPRNAQGHGWLRPAIGVVELSQCIIQAVPLSARKTTGGSPEGVAPFLQLPHFSETVIKKVARKKVRTFQELHDMNSQQRADLLIQSAGLSSAELQDIEMVLDMMPSLTIEVTCETEGEEGIQEGDIVTIHAWVNIKRGNGLIGALPHAPYYPFHKEENFWFLLGDSVSNNVWFSQKVSFMDEAAAVTAASKAIEESMEGSGANVKETSRAVAEAVEKVKGGSRLVMGKFQAPSEGNYSLTCYCLCDSWLGCDRKTNLKLKILKRTRAGTRGAALADEGPIMEDGVEEDEDNEDGEYDDDYESEYSEDEDDQNSKNKHLAANGTANKHGQTAESSSTDEE*
>comp44256_c0_seq1
MATRIQFENSCEVGVFSKLTNAYCLVAIGGSENFYSVFETELADVIPVVKTSIGGTRIVGRLCAGNKNGLLLPHTTTDQELQQLRNSLPDQVVVQRIEERLSALGNCIACNDHVALTHTDLDRETEEMIADVLGVEVFRQTIAGNILVGSYCAFSNRGGLVHPHTSIEDLDELSTLLQVPLVAGTVNRGSEVIAAGMTVNDWTAFCGSDTTATELSVVESVFKLREAQPSAIVDEMRKSLIDSYV*
>comp36136_c1_seq1
MVIYKRKFIWNNHLALLLEGGSGLVCKLQKSLYGLKQSPRAWFGHFSTIQAFGKTHNKADHSIFYWHQSPGQCIYLVHVDDIIIIGNDQVGIEQLKLHLFNHF
>comp502844_c0_seq1
MRILGRPSTGIKNNERENWKIIKQTIVLGRFYTKKIHWTD*
>comp14604_c0_seq1
MELNCVHGAGIYFPSLDKIFLPKILINCLWLVMVSF*
>comp41449_c0_seq2
TSFAAEVGVLSRALKSWNHPSPSHLSPKRRKSPKRRRSPRRRRSPRSPSL*
>comp36602_c0_seq1
MAIFPFISCLEHALLRPHWNNQLDSYNSKFLYYIHYFCIACHQMV*
>comp21946_c0_seq1
RQVRDIWVFNLNGEIVEKAIQTSKVVVAAVALIWGSFHLFSSYLSRFCCLFLWLGFCNFDS*
>comp16808_c0_seq1
LWGRQIPCKLAILCFVVYIILYAFLLYWLSVCCSVSLTWIASLWCFRLHFNFLLCHITYHFLLVEPV*
>comp354170_c0_seq1
MVARGTAGYIAPEVFSRNFGGVSHKSDVYSYGMMVLEMVGGRKNVNVEVEVECSSEIYFPHWVYKRLELNQEPELRCIKNEIDKEMIRKMIIVSLWCIQT
>comp340462_c0_seq1
MVSPRPGIYFCYNCLNAMAGCMKVNTANTSVNCKRD*
>comp71614_c0_seq1
MMRFLGYTKIMGTGEFAVPRNLLPLYNSKI*
>comp39301_c0_seq1
MFFRVLATRLASTCSKAGTVPEATPFRKWVYNSTGFNKYGLMHDDVLYEDEDVKEALRRLPEQQLHARTFRIIRAMQLSMTHDVLPKEQWTKYEEDVRYLQPYLEEVKKEKEERAEWDANN*
>comp20905_c0_seq1
WNNGTKFLNWKQNFKKE*
>comp150079_c0_seq1
MKVKTQAYMTQPRNLPQITVKRTPTSNYSQVLIYYPFTVFKTR
>comp24524_c0_seq1
MLMHYERVFTGSVGVFPCWISWSVLHLLVKQGHTVLFLDLVGTFALFPHLSFFSFWLSFTFLCIYVAKIEDVVSSSYASHRDHQVIKICCCMI*
>comp246446_c0_seq1
MLLNNISETFNAYIKDARDKPIITMLEMIRRQLMKRFHVKRDGMLAYSQTVCPRILEKLEYAKKDSMNCIVYIGGQRTFEISHCVDGNKVVNLLQRTCTCMKWQMTGIPCGHAVAAIFDDKGRPDNYVDSIFSKETFLKAYDYHIHPMPGEDDWPECIYDEILPPTVKIAPGRPKKKRIREEGEPANSNRISKRGSKMKCGNCNEEGHNARSCKQPLNPNRKVYKKKALNPRIEQECKE*
>comp574023_c0_seq1
MCYDCVYIFLHEKMGLWIVLFDYHIFPCYSLESGWVLKEFEMTKFQDSAHEFRCLKYLRVLSALVLECADMIQFPTGHCN*
>comp48869_c0_seq1
MMMMSEVKDARVGVYSVLLKIACASCACLVLHVLCDNRNAIMLLLKVHK
>comp5208_c0_seq1
MLLEEKLLVVSCIYLWLTFLKSAKGYNSSVYRRTQGDIFPHKDMRKKKRAKPK*
>comp57978_c0_seq1
MDPASYVHTIVGLLALLIVYSVFRSFRTPKESKGNTKRNKVPEPFGALPFIGHLHLLGGRDPIFRTFSFMAEKYGSIFSLRLGCHQTLVVSSREIAKECLTTNDKVFASRPNIAAGRYMGYNNAIFALAPYGQYWRNIRKVATLELLSSHRLEQLKHVRDSEIYSLVKDLYTSYAKNLNDSIQVPISNLLEHLTFNINVQMIAGKRFSGETISQEDSEAWRLKSAIKDATYLSGVFVEADAIPYLSWFDFQGYVSFMKRTAKEMDFVLDKWMDEHLRKRAEDENSYENDFMDILISTFEEHDVICGHKREIVIKATAMILILTGTGSTAITLTWALSLLLNHPNVLKAAQKELDTNIGKDKWVQESDIKDLKYLQAIIKETLRLYPPAPLTGIREAIDDCCVAGYHVPKGTRLLVNIWKLHRDPEIWSNPDEFQPQRFLTTHADIDFRGQNFEFIPFSSGRRSCPGMTFGLQVVHLTLARLLQGFDISTKAGVPVDMSEGLGVALPKKNALEVMLKPRLPLELYQSR*
>comp371150_c0_seq1
MKISKCKRVFIKDEQSVIEDKMSQVHEKSLHELAIVKTREVLSLHELATVKI*
>comp59698_c0_seq3
MSEMANTDPEGVDGVRMTWNVWPRTKVEASKCVIPLAATVALIRSHPDIPKLPYAPLRCKTCSSALNPFSRVDFTAKIWICPFCYQRNHFPPHYNAISETNLPGELYPQYTTVEYALPLSTNPNLDPSLPLPPSPVFLFLLDTCMIEEEIEFVKSALKQAIGLLPDNALVGFVSFGTQVQVHELGFSEMSKVYVFRGSKEIPKEQILEQLGLGASGRRPAGGYQIQKGVQGGFPSSGVTRFLLPASDCEYTLNALLDELQTDQWPVPPGSRPARCTGVALSVAAGLLGACNPGTGARIIALVGGPCTEGPGTIVSKDLSDPVRSHKDLDKDAAPYFKKAVKFYESLAKQLVSQGHVLDIFASALDQVGVAEMKVAVERTGGLVVLAESFGHSVFKDSFKRVFEEGEQSLGLCFNGTLEINCSKEIKIQGIIGPCTSMEKKGPSVADTIIGEGNTTAWKMCGLDKSTCLTVMFDLSSSDRSNTPGAANPQLYLQFLTSYQSPDGQLVLRVTTVTRRWVDTAVSSEELVQGFDQETAAVVMARFASLKMETEETFDATRWLDRFLIRLCSKFGDYRKDDPSSFTLNPSFSLFPQFLFNLRRSQFVQVFNNSPDETAYFRMLLNRENISNAAVMIQPSLISYSFNSLPAPALLDVASIAADRILLLDSYFSVVVFHGMTIAQWRNLGYQNQPEHQAFALLLQAPHDDAQIIIRERFPVPRLVVCDQHGSQARFLLAKLNPSATYNNAHEMAAGSDVIFTDDVSLQVFFEHLQRLAVQS*
>comp21513_c0_seq1
MIKHNSSKSSNNPFCTPLRSSPLDKSLSFLPCHNVVSAQLRRSIFEDRYQCQS*
>comp81396_c0_seq1
MRIKFMNSSQSLLPRSHGDEGKATAPAIFVLYYLDVGYSSALAKEVVDVGHRQGPW*
>comp8336_c0_seq1
MKIPFLMFLIIYWQNFLWYLFLEEARTTASTTPNIGQSFLLSKFPKKRKSKQDFMSCLN*
>comp47962_c0_seq1
MASLSLSSPPSLSSAHHNASTHLILRTPNSLKLRTNPHKPLSLRLRAITLTQDDLKKLAADKAVEYVKSGMVLGLGTGSTAAFVVAKLGELLRSGQLKDIVGVPTSKRTEEQARSLGIPLSVLDDNPHLDLAIDGADEVDPHLNLVKGRGGALLREKMVEAASDKFVVVVDDTKLVTGLGGSGLAMPVEVVQFCWKYNLIRLRDLFKEEGCDAKLRLDESGKPYVTDNSNYIVDLYFKTPIRDGLAAGAEISALEGVVEHGLFLNMATSVIIAGKTGVEVKDK*
>comp54061_c0_seq2
MAPNSLHSIHHHHHHSVIKLKRHYPSQTPPPTLSASLFLKPTTINTNIFLSHSHSLSSSHSSSTSSLTFSLSPTTSSAITSTSQTISFDLLQQHLSAKNFRQADEETRRLLIILAGEAAQKRGYVFFSEVQFISETDLITIDELWRKHSDNKFGYSVQKRIFEKVNGDFTKLFIKIGWMKKLDTEVEQYNYRSFPTEFIWELNDDTPEGHLPLTNALRGTQLLNNIFNHPAFDAVQEKGEEEVQDKATDDNIGVLRGLKNNSSGSSAKPLDKRIFKPDYSF*
>comp41619_c0_seq1
MKASIGKTKRADMALGAEIVMVLVGLWGVFLRPMMFRYAAEMGEAMGYAICLLIRGRRPSWVLPSYLP*
>comp31877_c0_seq1
MAEGPPPVGNPLVSSIVKEGWLQKRGEHIRNWRARYFLLLEDGSLLGYKNKPELPMDPLNNFTVKGCQIICVDRPKPYTFIIRGLQWTTVIERTFHVESE
>comp196912_c0_seq1
HQCAREEINSETPITSYKEIKDKVPLEHDLESQSLIQGLIKSTKEPLSGK*
>comp55762_c0_seq1
MMAIGLFMWAFITSFFALILGFASLLINGRRRNPNRAVAFFHPYTNDGGGGERVLWCAVRAIQEESPGLDCVVYTGDHDATPQRLMGRAIDRFGVKLLCPPKVVHLYKRKWIEEATYPHFTMIGQSLGSVYLAWEALRKFTPLYYFDTSGYAFTYPLARMFGCKVICYTHYPTISSDMLSRVRQRSLMYNNDSLITKSIWLSWCKIIYYTFFSWMYGIVGSCAHLVMVNSSWTKSHIEKLWGVSDRIKRVYPPCDTSGLQVLPLERSAEIPVIISVAQFRPEKAHSLQLEAFSAAIKSLDSSLPKPKLQFVGSCRNKSDEERLQMLEKKAIELNVDEQVEFYKNITYSDLVGLLAGAVAGIHSMTDEHFGISVVEYMAAGAIPIAHNSAGPKMDIVLDEDGQQTGFLACTIEEYADAILRIIRMPEKERLKMAAAARRRAGRFSEQRFYDDFKAAVRPIICHVSR*
>comp35861_c0_seq1
MSLRNHKRLLEPLNEVRQVVKTDFQVVKEKSPSSGYESGGSEKRDSSSEDSSKKENKQMTYKKRRNLAGKMKSIIPRMSLRNHRKRRRGIGKRRHRVYRSSKV
>comp300240_c0_seq1
MPLILPKFIIFPSPEIPKIKHPAGLELNKYECKLNL*
>comp55765_c1_seq1
MFKFVVSRAVKAPTPHTNKAFALSRCVHSLPFATVEAEEISGSRPAEVQNLVQGKWIGSSTWNTVVDPLNGDSFIKVAEVDEIGIQPFVESLSNCPKHGLHNPFKAPERYLMFGEISAKAAHMLSLPKVSDFFTRLIQRVSPKSYQQAFGEVYVTHKFLENFSGDQVRFLARSFAVPGNHLGQQSHGFRWPYGPVAIITPFNFPLEIPVLQLMGALYMGNKPVLKVDSKVSIVMEQMLRLLHSCGLPVEDVDYINSDGKTMNKLLQEANPRMTLFTGSSRVAEKLAVDLKGRIKLEDAGFDWKILGPDVQEEDYIAWVCDQDAYACSGQKCSAQSILFMHENWSNTLLISKLKDLAERRKLEDLTIGPVLTVTTDSMLEHMNKLLEIPGSKLLFGGRPLEDHSIPLIYGALKPTAIYIPLDEIMKDKNYALVTKEIFGPFQVITDYKSDQLSLVLDALERMHAHLTAAVVSNDPLFLQEVIGKTVNGTTYAGLRARTTGAPQNHWFGPAGDPRGAGIGTPEAIKLVWSCHREIIYDIGPLPKHWEIPPST*
>comp55249_c4_seq11
MRSKFDIYPGWPQYIADVTQRFGEAYEDPLSTLIQVKQTGKVQDYVDDFELALTQVNLPPEHSLSIFLAGLEHNTQMHVRMFSPTSIAQAANLAKLHEASRTTVNMNRFTNRTNLQSVKPVAVLTKPTLANSSTIPTQGPKPIFSKTPRSYSAVEMADRRAKGLCMFCDEPFTPGHHLKHKRSQLLVMEMEEEEPISEETENKEDNGLEIVESSQFESPQLSLNALTGVSNYQTMRVSGLHNKKMLQILIDSGSTHNFLDLDLAKQLGCKLEPISPMTVTAGGGTKLQVTYICKGFSWHLQQSKFATDVLVLPLGCCDLILGIQWLTSLGPIIWDFSKLQMEFSMEGKRFVLRGAKPSGIKLINNKSFTQAVQQGAQMCFLFLDRSNHQLGVPTCNVHVAATSDHKLPGEIEELIAGYSDIFEDPKLLPPLRSGFDHRIPLKDGSNPFNMRPYRYSIIQKDIVDKLVEELLAQGVIQPSNSPYASPAVLVRKKDGSWRLCVDYRRLNQQTIKDRFPIPLIEDLMDELGGSSVYSKLDLKSGYHQLRMEPGEEYKTAFKTHAGHFEYLVMPFGLTNAPASFQALMNHIFHPYLRRFVIIFFDDILIYSPSLKDHALHLHTIFQVIREQHLFLKREKCCFATSKVEYLGHYISREGVTTDPTKIQAVADWPQPTTVKQLRGFLGLAGYYRRFVKNFGKFAKPLTDLLKKDSFIWSNEAATAFTTLKSALISAPVLALPNFSKTFVVETDASGSGIGAVLMQDHHPIAYISKSLGPKQQAMSIYERELLAIVYAIQKWGAYLSHGHFIIKTDQKSIKFILEQRLNTPFQQVWMSKLMGFDFEIHYKEGKENVAADSLSRKPGAELLPLMLSNAKEDLLDLIKACWNVDPSIKVLIQELEQNPSKHPKYTWYRGELRRKGKLVVGADPVLKSLILNWLHDSSIGGHSGRDVTAARVKSLFFWKGMAKDIQQYVRNCDVCQKCKPDLTASPGLLQALPIPNRVWDDISMDFIEGLPPSHGKQVILVVVDRLSKYAHFLALSHPFTALDVAHLFLDHVFKLHGLPSSITSDRDPIFLSKVWSELFQLQGISLNKS
>comp44658_c2_seq1
MPSDVLEVSTCFMRKPVRILVKKEELTLEGIKQFFVNVEKEEWKMDTLCDLYDTLSITQAVIFCNTRRKVDWLTENMHKRDFTVSAMHGDMEQRERDVIMRQFRTGSSRVLITTDLLARGIDV
>comp353496_c0_seq1
LLETSKFLKVHKIGHLYHDKHTIPPSLRIL*
>comp37117_c0_seq1
MQQPVIQVQIMPIITINVQNNNNDNDNNRPSSLRNYLIHNFYRVQDSMFLLEFPLFP*
>comp56194_c0_seq3
MAATVSAWSKPGAWALDSEQHEAEELLQQKHNDHTVKPLADFPSLAAAAASKPKKKKPQTLSLAEFTAKPAQSQDPLTLPTGPRERTAEELDRDRNRLGGGFRSYGDRPHRSSGGDESSNSRWGSSRVSDETRRNGSFGARDSNRELAPSRADEIDDWAAAKKSSVGNGGFERRERGRERERGDFFDSQSRADESESWVSNKSFVASEGRRFGSSGGGFERERRVGFGSSGGADSDNWNKKKGEFNFNGGSERTESGSGRPRLVLQPRSSSVSNESHDAATTGNVSKPKGPSPFGEARPREQVLEEKGQDWKKIDEQLETMKIKEIVEIKDGFGKRGFGSGNGRASLPEDRTERSWKKAESDDGRPKSAEKVEDEHAEEN*
>comp55869_c0_seq1
MPTDVPIQTIINTRYHLHMHDFVQFCNHTSNIFNHLILPLFTFLSSSFPFFNTRN*
>comp56102_c0_seq4
MGRQKGEGARSKARPSSSSLAASLLSSGSGAAVGFGGYVGSSRLDPSLSTDDSLPFADVDSEIAVHLKRLGRKDPTTKLKALAALSMLLQQKSTKDIVLIVPQWAFEYKRLLLDYSREVRRATHDTMTTLVTSIGRDLAPHLKTLMGPWWFSQFDPVSEVSQAAKRSLQAAFPAQEKRLDALILCTTEIFMYLEENLKLTPQNLSDKAAALDELEEMYQQVISSSLLALATLLDVLICLQQERPGFENITTEPKHASKAKMAAVSFAEKLLTDHKYFLDFLKSQRPAIRSATYSVLKSLIKNMPQAINEENMKTLAGVILGAFNEKDPTCHPSMWDVILLFSRRFPGGWTSLNVQKTILNPFWSFLRNGCFGSQQVSYPALVLFLENVPPNAIGGDRFFLDFFKNLWVGRRTSQSADRLAFFQAFKECFLWALKNASRYNDGVDSISHFRVTLVENVLVKLSWQDFLTPRSSKGHDIINSGKAADSSEENFLLNKKTVDMLNTKYPMPYLQELGRCFVEMLLGIYILDSNLLSVFIVELEENCMGILQQAGNEENVERIILFMLLLEQHAVLKGETWPLVYLVGPMLAKSFSIIKSSDLPDSVRLLSVAVSIFGPQKIVQEVFIQNRGHCCSQLSYDGDKVLEAEDFMQIFKKIFVPWCLQENSCSTNARLDLLLALLDDEYFSEQWSFIVNYVISERYSGCPPGLLDADHAAMLAMLLEKARDENMKRKMRDDSNYRQGANADDWHHEHLESAAIAVSHSLPPFSTSHVQFVCTLLGGSTEGRSTFLSRNALILIYEEIFRKLLSFIQVSSFSWVQNTASVLSNDAKIRVEFDSSVNIVEMAQFALEILDGSFFCLKALDGESGLVSGILSAIFVIDWECNLIKALDDSLDGESRTKTKARLTFGESVSAFRHKINAQFLKSLCLDSHKRLLNILIQSVRFAIFVEDKLINDGIASLCCTWVLEVLKCLCVNENEDQNLLHQLLSKGEMWPVFVVPNFSLTKASGHQKFVALIDKLIAKIGIDRVFAGYAMPNPFERSQEGASSAWLAAEILCTWRWPGNSAVSSFLPLLSAYAKGNNSPQESLLDDILSILLDGSLVYGGNGTKSSVSMWPVPADEVEGIEEPFLRALVSFLSTLFKENIWGTGKALNLIELLVNKLFLGEAVNTNCLKILPLLISVLLEPLYGSVEPGRDVQLQPCSLEERFLQNTMIDWLERALRLPPLVTWKTGQDMEDWLQLVIACYPFSAIGGPQALKPERSISPDERKFLYELFQKQRHVTGGSAMINQLPVVQMLLSKLMVVSVGYCWNEFSEEDWDFLLTNLRCWIQSAVVMMEDVAENVNGALVDCSSDNLDAMCKNIEKIVLISDPFPIKITENALLSFSLFLKHYKLQQAEEKDKLNTSKTEKVDSVKDRILEGILRLLFCTGISEAIANACCKEAASVIASLRVEYTYFWELVASGVVNSSSQARDRAVKSVEFWGLSKGSISSLYAILFSSKPIPLLQFAAYFVLSNEPVLSMAVLEDHACNSDMYAASDQDSSRLDMSIEEKVHLKEEISCMVERAPYEVLEMGLLAQRVNLFLAWSLLISHLWSLPSSSSLRERLIQYIQDSATPVILDCLFQHISLDISMVQILKKKDTELSGGLSQAASAATRAITTGSLLFSVESLWPVESEKISSLAGAIYGLMLHVLPAYVRGWFSDLRYRNTSAVIESFTRTCCSPPLIANELSQIKKAKFRDENFSVSVSKSANEVVATYTKDETGMDLVIRLPASYPLRPVDVDCTRSLGISEIKQRKWLMSMMLFVRNQNGALAEAIGIWKHNFDKEFEGVEECPICYSVIHTTNHSLPRLACKTCKHKFHSACLYKWFSTSHKSSCPLCQSPF*
>comp292107_c0_seq1
MLFNLGWSFSPPYSVIIVFLQISPLYNTRTEYTDVPIRYGFSMLEQFIQMVLFNEVCTN*
>comp204946_c0_seq1
MLLVLACRNFGVAIACLVAYFNV*NCILVLAPSSFRFNSYAPIFGGKTQKNKSINVGNSFPLLAEVEQCLFMLNL*
>comp41863_c0_seq2
MISLIWSYHVKWSHTENYMLFIYFYQTKNLYLYLFFLPFIFILYVIICPWFLLFGLLQYSNW*
>comp296243_c0_seq1
MFKVVSEAAVVIINRVVLSVVDLVLWVSVV*
>comp36035_c0_seq1
MGYSSDNDGNCFLVYEYAENGSLDDWLFSKSSATSNSMAFLTWSQRISIAVDVAKGLQYMHEHTQPRIVHRDITTANILLDSSFKAKIANFSMARTSTNPMMPKIHVFAFGVVLLELLTGKKAITTNENGEVVMLWKDIRRIFDLEEKREERIRRWMDPKLESFYPVDYALSLASLAVNCTADKSLSRPTMTEIVLSLSLLTQPSPATLERSWTFGNVEVTQTVTPIAAR*
>comp764_c0_seq1
MTVLIPRNTTIPTKKEQVFSTYSDNQPGVLIQVYEGERARTRDNNLLGKFELSGIPPAPRGVPQINVCFD
>comp41613_c0_seq1
MQQIRTGLRKHAVVLMGKNTMIRKAIKGHIPENPKLEKLLTHVRGNVGFVFTREDLIDVRDKILSNRVAVPAKAGAIAPVDVHLPPQVTGLDPEKTSFFQALSIPTKITKGRIEILNEIHLIVKGEKVGASEATL
>comp548620_c0_seq1
MQTIKLCKMHQVCNTMHNHSLATYTYECILKKEGENDVLNLTIFKVL*
>comp58693_c0_seq2
MCSKMSELEFLHSRACGLPIYVKEIEKLEGKISSTKAWLDSVRKCISASNPAALEIDVLYKLKSEIEDLQVQLPEMDVLQNLLSQAESCRAQCGELLEGLMNLKNVGLLLKEWDTFTVDVPELKLIRQYHADAVSWVSHFNDVLGRVHMQEHQHNAVGELKCIFEEGLSLKIQVDELPLVEIELKKANCREKASKARDFKMPVEFIQQLMKDATMLQIEGEKLFVNLAYVLAVAMPWEERAREILSHEAPISDFEDMIRASESIFVILPSLNDVKDALSEANSWLRNSKPYLVSSTCSSNSLRKVEDLQMLVSQSKLLKISLEERRMLELVLKNCKIWECEACSLLEDAQCLFELDNTVHGISSGLMFEVEDLIEKIQSAIRSGVSLGFDFNEISKLQASCSTLQWCKRALSFCNNSPSLEDVLEVAERLSHSCVSGPLLKVLVDGLEWLRRALEGISGPGNSRRCKLTDVQDILTDYQTINMTFAAVNCQLEEAIGKHKLWQEQVHQFLGLSSRERSWLSILQLKELGDTVAFSCSELNLILSEVEKVENWKKSCMDNIGTLAQNENSLLDALEKIKQTLDRSLFIYGKLQDWKEQNLCFCCFIDSEDQEFLTCSTCMDCYHLRCTGLTTENTSLENYKCPYCKILKGESRYQNGGGPLRFGKKRAELKVLIELLSDAEHFCLWIDERDVLNQLVEKALACKSCLREIVNLASANVDEDISIISEKLSVAIKASNVAGVCDQRDNCDLELALAKNLWKIQVNGLLNGVQKPTIQQIQKHLNEGLAMEISPKDHYMLKLTTVNCLGLQWAELAKKVAIDSGELSLDKVFELVVEGENLPVDVDEELRILRARSMLHCICRKPFDPSRMISCDQCDEWYHFDCMKLPCTREVYICPACNPCPEGLPTNHERLTGAKFEEPKTPSPRHTNPRKKQKRAVPGLTHKMCATGDQDSSNFRYSSGIECLRWQNRKPFRRAAKKRVELRRLSPFLCIQQ*
>comp5695_c0_seq1
MLMSIWRGNGPLEPVSSSMTLLESYGSWSNVGNFPAATLDFSKRRKISASLWYSNPNLLLGFLAVNEI*
>comp587563_c0_seq1
MPTKYNKMLYIKACIIQMPSIYIPLIPGMLIINLLFKNGRMTYNLDHPNILKKNQRT*
>comp240330_c0_seq1
MIKRKGGESYFCSLSLCPTLKKRMPYTAIVHYSNAYLLPCIPRLFLNLKHSL*
>comp210231_c0_seq1
MSRTTFLLEGESCNTPKFQLMLYMLFSQISVDISCIFCICLYYFNRNTKNFMIKD*
>comp46661_c0_seq1
MEALFPIKQILSGTESEFSRNSFLRVLTNGILRLRSQYPVHLTNFEDQEFIGRLEKYVKSI*
>comp39709_c0_seq1
MKNNQEDSTVLSEAAIEVLFHLNPSEAQIKNLIKDEGIQFIESLFQVLRLGNYQSRAY
>comp133840_c0_seq1
EKAPSLLVDYHPKQYTLPDLLFYLILPLKVSRSKPLSSSKKDTRSSSSLKIPPLSQSAKEEASSAESESSKTGPLVTTLVESTQFKPLIVE*
>comp57991_c1_seq1
MKEGKKSQQQQHPTPTVTVDDKYAQWKSVVPVLYDWLSNHNLVWPSLSCRWGPQLEQATYKNRQRLYLSEQTDGSVPNTLVIANCEVVKPRVAAAEHISQFNEEARSPFVKKYKTIIHPGEVNRIRELPQNSKIVATHTDSPDVLIWDVETQPNRHAVLGATSSRPDLILTGHQDNAEFALAMCPTEPYVLSGGKDRSVVLWSIEDHITSAATDSKSGGSIIKQNSKSGEGNEKTADGPSLGPRGIYYGHEDTVEDVAFCPSSAQEFCSVGDDSCLILWDARVGSSPAVKVEKAHNADLHCVDWNPHDVNLILTGSADNSVRMFDRRNLTSNGVGSPIHKFEGHNAAVLCVQWSPDKSSVFGSSAEDGLLNIWDYEKVGKKIERSGKSPSSPPGLFFQHAGHRDKVVDFHWNAYDPWTIVSVSDDCDSTGGGGTLQIWRMSDLIYRPEEEVLAELEKFKSHVVECASKSEK**TS*ATSSFLLVVWTMDIIFAIVFISSTYAVDVSLLLKTTHVGGRSRES*
>comp57491_c0_seq2
MADVVQYRLERMVDELEELEQRGLFSRREIAEIVKQRRKFEYRLKRPSPLKQDFLAYVEYETQLDALRSLRKKSVARELKKQGNKKLNKSKLDFAGVLRIMEIYELALKRYKGDIDLWFRYLEFCRQRKNGRMKKALAKVIRFHPKVPGVWIYAAAWEFDHNLNVAAARALMQEGLRVCPTSEDLWVEYLRMELTYINKLKARKVALGEDEGTLTRDTRTADEKQWRDENKELFMSLDEKENNDGPNVESDESKKKQELFAEHGMNIFRTIYSGAVEAVPSSLCLRKRFFEILEGINLAHTEEMCKEILNDMKKFFMTEPEFWDWLARHECDLENVQEISAEVISPQVQKAVQVYEEALKSVPSGTMFRLYANFLMGVVAPKEGETNISGSSGHAANYISHLLTIYERAESMGCITEDLACKHVSLHLQLRQLDEARKLAAKLCSGKLAESVELWGLRITVEIRCITKSSPSPSDADLLSLFELLRHILTKVSVSKSENLWVKALKFYANQRQYFDKLVEISVVSLATDGGSENGFSLSSAIVSFILQKDGIQRARDIYKRFLALPRPGLALYRNCIDLETNLASIGDNAGLINARKLYESALATYDQNVSLWQDYYQMETKMGTSEKANAVYWRARRILKDASEFVASPDL*
>comp55621_c3_seq2
MGIYLSTPKTEKFSEDGENDHLRYGLSSMQGWRSTMEDAHAAYPDLDESTSFFGVYDGHGGKVVAKFCAKFLHRQVLKSEAYKAGDIGTSLQKAFFRMDEMMQGQRGWRELAVLGDKINKFTGMIEGLIWSPRSSDGNDQVYDWAFEEGPHSDFSGPTSGSTACVAIIRNNQLLVANAGDSRCVISRKGQAYNLSRDHKPDLEIEKERILKAGGFIHAGRVNGSLNLSRAIGDMEFKQNKFLPAEKQIVTANPDINTVELCDEDEFMVLACDGIWDCMSSQQLVDFVHEQLSSETKLSAVCERVLDRCLAPSIAVGDGCDNMTMI
>comp25750_c0_seq1
MKHIDVRYHFVREILEEGEILLQKIQTAENPADMMTKIVTSIKFQHCMNLINIMKIANG*
>comp500324_c0_seq1
MYVLCNWKYNCMRSFLVMSTDKTVNCIFAGL*
>comp236805_c0_seq1
MVLEEYKDTLGRIAGSMGILHLLIPAAICLQIVRQGSTENINGAHFMIGGCITLLKMRHGQLLNSIHMVTSSSIGFCMCMFYLSVYTFYDDNRKGLGK
>comp45214_c1_seq1
MEPNQTVLSLRTQITDPDNVIVIDREHFEHNLARLASLSSALNEAKQKKRTLHQNLEALIQVNAMSLGRLNELDGMRQKLESKKMMMENMSIRSR
>comp386754_c0_seq1
MKAVSADKANAKIWQSLKKLTSKGQKVFLDKVEEEFTCVCCMSLVFHPVVTSCSHNICQACIKRSFKANITSCPSCRNELGSDFDFKINQNLSDALSLLFPGYSAGH*
>comp253865_c0_seq1
MMMYYRM*ILPKENRQTFNF**YGGKNQFLANGT*SNCNLQRKRKSYINASNHMPSTA*
>comp204523_c0_seq1
MLCDDYDNVIQNNDIVGRILNFKACFGLILIVD*
>comp54478_c0_seq1
MLHTHIFSSFTSLHPKPDRSFYVPPSSSSSAPTRRRFVRTATPSKKNLKLLTSRIVQLTRRKQLRQILDEIEVAKEHFGKLNTIVMNAVMEACVRCGDIDSALRIFDEMKKPEGCGVDTVSYATLLKGLGEARKIDEAFQLLESVEKGTAMGSPKLSAPLIFGLLNALIEAGDLRRANGLLARYGFGLREGGNFSVSVYNLLMKGYINTGCPLTAINMLSEILHHGMMPDRLTYNTLILACVKSEKLDAAMQFFEEMKGKAQKSIHDDLFPDIVTYTTLVKGFGQAKDLASVLKIVLEMKSCHELYIDRTAYTAIIDALLKCGSVKGALCIFGEILKQAGWNPELRPKPHLYLSMMRAFAFRGDYDLVKNLHKRIWPDSAGTILPVSQEEADHLLMEAALNAGQVDVAIKTLTGIASRRKGISWTSRGGMVASRIEAILGFSKSIFSPYILPQVSPAEPVESFMIPFEATRPLQGTIKLKKVVMRFFNDAVVPIVDEWGSCTGLLHREDCNQLNASLSTMMRSPPPSVTTSTSIGHVVDLILEKRYPMVIIVNYTKSYATSYSSRAVGVFTSEQLNSLITPVSELKRPDLSVYRR*
>comp54489_c0_seq3
MAFEEGEETNNPELVAIGKDIVKKCDGVPLAIRTIGNLLYSRNLGESDWLYFRDSELPKIDEYKDKIFAILKLSYDHLPSDLKSCFAYCSLFPKDFMIKRETLIQLWVAQGFIQPSDPIKSLDVGNECFMNLLSGSFFQDAKTDDYGDTISSCKMHDVMHVYMHNLEDNYMHNLDDSVHGSEYHLTSEGTKNPIKYRPRHLSLGHHLDFENQREAPTIPLEKAGKLRTFLLPCQLPRFHRVLSFPQSACISLISNLKRSRVLDLHYSDIRTIPKSLGELRHLRYLDLSGNYCLDEKLLQGITRLHNLQTLKLNQCHYLKELPRDIDRLVRLMHLELDECWGLNCMPHGLGQLTGLQTLTRFGLDERNHERISVLGGLSNLGGKLKISGLQHLRGNARMVESARLFEKQYLRELVLDWFGFYHVYRDESEDAATKDELILEGLKPSHTIKRLVLDGFCGRRLPNWIQNLSSLLVLEILDCKNLTSLPEWIRMISSLKKLQIFGCNGLTSLPEGMCNLKTLTIARCPRLKKRNQKEGDDCPKMPHNPNAV*
>comp30883_c0_seq1
MFILNFFKIWNINIKVHFYFFKLMK*
>comp289561_c0_seq1
MYVFIQICKL*QLISFQGTSIPIINISDTKLDICLVPTLTIKNLLNNSTVREHHNNLSKKYEQS*LF*ERKTMPVALEHMK
>comp35520_c1_seq1
MDFGFYKGAVGNNDVFGVRSNRSSGAYIFRPNGTVNLFAQNPAVTIVQGDVVSEVRYKYSDWISSILRIYRGAEPFHVEHEWLVGPIPFDNEGFGKEVVIRYHVSDLHNNGEFLTDSNGREMLKRKMNYRPTWNVDLDEKISGNYYPVTTRIAIEDGDNIWSVVTDRSQGGSSLQDGTMELMVHRRLSHDDAFGVGEALNETAFGKGLVVRGIHYIVPGSHADARKVVQNKVLHPWYFLSSAKNIPFEDWRTRYRMVMDGLKKSLDDRVQVLTLEPWKSDGTHILRLENIMEINDDPKGNDPVTINLDDLFAHWTVLEATEMLLGANAPKSEVERLKWTELGSQPSPSVTSVPGLQISLKPMEIRTFLVKLQQS*
>comp21724_c0_seq1
MAHIWISRIETEIVPSL*YLLTRQTQYVC*TTRP*NAWLPQLLSNIRSPTSAKSPPL*KLSSTTTILRSE*MSPSRHYVSFSV*
>comp52566_c0_seq1
MLMQVVPMSWPSIKQSLLSTRLQLGSSLKSEGSEESMECRSQILGPAQHIGLA*
>comp295447_c0_seq1
MCMHVIYKTYNFHRMHVYLQKHQMCKGTHITSSMNFNKVVHLTSN*
>comp57166_c2_seq2
MEPQQELEWIEAQKIAISVDLVAVAKKQLQFLAAVDRNRHLYDGPALERAIYRYNACWLPLLAKHSESRVFEGPLVVPLDCEWVWHCHRLNPVRYKSDCEELYGRILDTFDVVSTVQGICGRQTEEKWNELYPDEPYNADLINVFPEDISERIARLAKYTKYDLVSAAKRQSPFFYQVSRPHMNNDHFIKEAVARYNGFLYLIKRNKEKGIKRFCVPTYDIDLIWHSHQLHPVSYCKDLNAALGKVLEHDDTDSDRTKGQKLDVGFSGTTKQWEDTFGTRYWRAGAMYRGNAPSPITSNPSSSGMICKKVVSSNEHPQEIQLQDRKVVEILLEFVGVKNLPEGQKGSLFVLFSKSQPDAFFDAKRRLSILSESGEKQVASFQCEPTGELLFELMSHSSSNLSIRRSSKTLGSASFSMQDYLDPVSKLSVEKWLELVPSSGTMSSKPILLRLAISFTVPVPAPYTLEMTQSLPFSKNSCFINLPVRHQHAKSWTHVTDETGTRVISLQMRDLKKENNIGSPTKEVVGLMKSGETRTLAEFMENGWSVMGNLLLFHLPNKCKNDGHLFELKGTRMVKIFSGRKLDYEPRHCGKQGNEMKFLTAVEFSKEDPYGKAVALLDMRSRLVTAKEKWMVLPGIVLAFIASDILKKEGYEGIIAKSKDLKVNSVTEKVNGPDEENERTALNEMELSCNVYKGDAGIPKKAGLSMGGCGSGCGSGCGSGCGNAVKSGGCGGCGAGGCGAGCGGGCGSMLKSGGCGG
>comp33865_c1_seq1
TGGSLPSLDSDLTLLFQNEIFGFVLFLL*
>comp48466_c0_seq1
MIFQRAKSINPNPARAIPLLRYANQALSQPFHFLHTNKPRAHERPQRVTSKHRERIPFITEVKEVEDPEEALSLFQEYKKRGFRHYYPSYAALLYKLSRSRKFEAVETVLAQMQDRGMHCGESIFIALFQHYGKALLPEKAVELFHRMPQFNCIRTLQSFNALLNVLVDNDRIAEANDTFGRSYKMGFRPNTVSFNIMIKGWLAKDQWGKACEVFDEMLQKRVQPSVVTYNSLIGFLSRKGDLDKAMALLEDMNHKGKYANEVTYTLLMEGLCSVEKYEEAKKLMFDMAYRGCKPQRINFSVLMNDLGKRGKIEEAKSLIHEMKKRRLKPDVVTYNILINYLCKGGKTVEAYKVLIEMQIGGCEPNATTYRMMVDGLCRIGDFEVGLNVLNAMLASRHCPRSETFNCLVVGLLNSGNIDGACFVLEEMEKRKVQFGLESWETIVKYACNEDKDASGLMTKLTSIHQMH*
>comp49413_c0_seq1
MQNHLINSTCIQLWWTLYVPIIFYKTKEPTIAHLIRSHSNRGLCMRSLKILYKTRCPIRLTYYIL*
>comp273167_c0_seq1
MHLHIFPRPHSNYKVTMQTAFPNNTNFQKPVHVETKKSNISGTVN*
>comp539358_c0_seq1
KTQAFKLFRPTKILALLGAICYTSSQVLYIYLGCLCRVDIFGVIIKYLIIRNQVT*
>comp233154_c0_seq1
MAVDLLHVIPGSKILDVGCGVGGPMRAIAAHSGANVVGITINEYQVNRAKMHNKRAGLDHLCEVVCGNFLDMPFKGETFDGAYSIEATCHAPKLEDVYAEIYRVLKPGAMYVSYEWVTTELYEPEDTMHVEIIEGIERGDALPGLRGYSDIAEVAKRVGFEVLKEKDLAKPPAGPWWLRLKMGRFAYWRNHILVTVLAWLGIAPKGVVDAH
>comp310215_c0_seq1
MRLITKEISISPNNETKQRNSAVYFPTF*
>comp54216_c0_seq9
MWTDCTTCFESCGTMATECSGCLGGAGEAGLPLLFIMALIVLGLFTVIGIFYSVLVATMVGQRIWQRHYHILAKRMLTKEYVVEDVDGELTGSDWSPPSLPPEHVQQLKTLGLL*
>comp179149_c0_seq1
MKQIMRTPENCSSEDALRVVCCAEEIAWIQLRRNEKKLLNDINADKGGRLRFHILGDKGKKKKRIQTREEKIFILANDCLTGDPSVHDLSLIQDMNSICSNGCRIAKCMRDYFIYKRNYKGAVNSALLAKSLDQKLWDDSPYLLKQLPGIGMVTAKALHSMEIKSFEALAEADPRRIEIVTGRKYPFGNHIKDSLLSLPPKIDVKLVEIESQRQGKSKLVVTLTRISQSVQSVKRHYADMIIGSEEDNTILFHEKIR*
>comp61100_c0_seq1
PVILIREKADALIRQYYCVIKEQNIN*
>comp57499_c0_seq1
MKYLFVVFLGAVCVHENSALFGIGDEWALSNMKVKYSANPLTGYYKLPKTLKENKKEYVQIDEATADLGVPATLWCRPNDPRVCLIFDKKGNNIGTQLSFLDQDTKHVEGYDYGFQNTYVRTNVFNISANSLRVFYTNPEKLTEAGRTSTKEVIDDVYVKLKGVWEVLPREDPKVAQSGNFYRQNCFTQMGRHYFYKMSAKFNDCSDIVPFFGIYHNGGLVGWGLATFGKPSKAKGGRSWYEDVPMLGVNMIMPDRPFCVDHLVKTYGLYAMHTYFVNHPELITCILQ*
>comp383265_c0_seq1
MSVQVGFNPEGRLHPFAYFIYFPTQAEKTNTIYHFHTHTCTQYI*
>comp58049_c1_seq1
MECVFGLVGNGFAIVVADTSAVHSILVHKSNEDKIMFLDSHKLIAASGEPGDRVQFTEYIQKNVALYQFRNGIPLTTAAAANFTRGELATALRKNPYSVNILLAGYDKETGPSLYYIDYIATLHKLEKGAFGYGSYFSLSMMDRHYHSGMSVEEALDLVDKCIMEIRLRLVVAPPNFVIKIVDKDGAREYAWRESVKDTSAPPA*
>comp123156_c0_seq1
MKVLVLL*ELNQKILWPALNFGGRCPLNGNFHLHAQIVSKEYKNSDF*SFTIIRCFTLH*FHIDVRYLLCQFNCEDTDNNV*EALF*FVMEDCLLRGSKHIIY
>comp41555_c2_seq1
MGNAFSTKDLLVFGWCLGLHKHVDTLADGRNRLYKLIDNLRAACLLLEGKRDSVVALDVVRNVAASIASKVKPFFTVQRNAELKEWPRMDLLKNCHHIFLDWCFIHELPERLECPKLKILQLNSQGNYLKVPDNFFVEMKELKVLSLGGLNCSPSLPSSIGLLTNLQALNLCKCMLEDIAIVGELTSLEILDLQKSELKELPAEIGQLIHLRLLDLTDCSTLGVIPCNLISSLTSLEELYMGNCNIQWEAEAGENRSNNSSLSELRHLHKLTNLNMQMKDASVFPRDLFAFGKLEGFKILIGDEWQCSGVESGNYKSSRVLKLNLSMDPNILLDYGIKLLLSRAEDLYLAELKGVREVLYELNDEGFSQLKHLNIQNSSEMQCIIGSTEWAHIDHAFPNLE
>comp44160_c0_seq1
MTLTKICVPLYSTFKPVPHFHDFNSTPNRVCICMYIHRGCYYTPIYTPLGAQKAYIFVCARV*
>comp172759_c0_seq1
MSTTSGPRLWLEVYVLNFETMLNFLIIDLRDPTTLLLVFCDKRLSWHCTEYQCLNVKSTYDLLYSTSFFGL
>comp216842_c0_seq1
MCSEFEAIYFYVVDCGGTLMSMSMKIDACVMTSPSRVKQLNNLNLNFLFYFNIYVKILEKEVNVCFINVIAVVLIIISIGFPEFGYLLGSYVIFCCCVRFIVTNNG
>comp55640_c0_seq19
MFPRKYSTWLLLFLVVLSTFSDLSMSDPESRWSAKKKRMREKVRNMFYHAYDNYMTHAFPHDELKPLTKTFTDSLGELGNLKLEHLPQDYNGSALTLIESLSSLVIMGNNTEFERAVLWLSENLTFDVDARVNLFECNIRVLGGLVSSHLLASDSSNKLFQGAYKNQLLVLAEDLGKRFLPAFNTPTGLPYAWINLKYGVMENETTETSTSGCGSLILEMGALSKMTGDPRYESVALRALRKLWSMQSSLNLFGTTLDVETGAWIEFSSGIGAGVDSFYEYLLKAHILFGKEDFWKMFHSAYLAVQKYFRHGPWYHEADMRTGRATYWQLTSLQAFWPGLQVLIGDTIAANSSHREFFHVWKRFGVLPERYLLDHQMLHPTEKYYPLRPELAESTFYLYQATKDPWYIEVGESIVNSLNLYTKVEGGFASIKDVTTMQLEDHQHSFFLAETCKYLYLLFDDSFLLESNYIFTTEGHPLPVLSTWHERLPETYIPTNWTFMKRQQAANRISAMSLQVCPAMTLNSGQHIESACHIPDARSDYRCLTDEDCGVDSTTCRRRSCSMAGYCGLWLFI*
>comp50190_c0_seq1
MMMPLPPLLSSATATVNLNEALPKLPMHAQSQMLPMNICLHTQPLCLGFQLPLTPHSQALWKPGPRSTSFQQSLPKPPKTKNVAYRGGRVMVNRFFNCEGK*
>comp256117_c0_seq1
MY*F*DIFSSFGT*FPYVCSFTLNTLNAYLKI*QI*GFKNFLRHKPLNSLFKDMA*
>comp120046_c0_seq1
SKWPYPTVSLINKNSILAFHHFWGKSFKHILCKLIFFTLDIPQCFC*
>comp277436_c0_seq1
MAGMIKFSCKLLPNSLYSFGVRGISRSAVKRHNLRATKSCQVGAALANTLRRELA
>comp57687_c0_seq1
MEEIEGLSSSETRSSSESRPPNPLAAAYRQCLSADPVVLPCKKSLVRHTSLMKMKLSDVSAEPGHVEDCKSDFLPILRSGACADIGFRSSMEDVYVCVDDIMQDYGLKNHIDGSQAFYGVFDGHGGKHAADFACCHLPKFILENEDFPSDIDRIVASAFLQTDNAFAEACSLDAALASGTTALAALVIGRLLVVANAGDCRAVLCRRGKAMEMSRDHKPSCSKEKKRIEASGGYVYDGYLNGQLNVARALGDWHVEGMKGMDGGPLSAEPELMTTKLTEEDEFLIIGCDGIWDVFRSQNAVDFARRRLQEHNDPAMCSKDLVDEALKRKSEDNLAAVVVCFQQQPPPNLVAPRSRVQRSFSAEGLRKLQSLLDSLGN*
>comp1430_c1_seq1
MLRLQAYAQHVPHHLHIAVPTHLYIILKLQKPTTSSAAFNPTTTTSSGNPSCYQE*
>comp242314_c0_seq1
ATSLTHICICIYICILKLVSFTVCRQKKRRPHFRNLTVSL*
>comp171536_c0_seq1
LSARSLTRSFKRVPPFLPHFFLSTTLLSPSPLFQPLSFQPLSNQSQTIQTPTQPHSYL*
>comp60308_c0_seq1
MYQGGAGPDMGGAMDDDAPAGGTGPGPKIEEVD*
>comp7195_c0_seq1
MAAIGLLNSKAEYVRTAQALALNISAAKGLQDVMKSNLGPKGTMKMLVSGSGDIRITKDGNILLHDMQIQPPTASLIARACTAMDDMTGDGTTTMVLLIAELLKQSDSYISEGVHPRAITEGFKIARQSCLEKLEQLKLPLTVSREHLIPIAKTSLRTKLAPKLADHLTEICVDAVLSIYNPAQSGNELDLHMVEIMAMQHKMECESKLINGLVLDHGSRHPSMPKKVKNAYILTCNVSLEYEKSEVNSGFFYNTAEQRDKMVKSERDFIEQRVNKIIELKKKVCNGTDKGFVVINQKGIDPISLDMLAKEGIMALRRAKRRNMERLALACGGAAVNSFDDMTEDVLGYAGSVYEHVLGENKFTFVVDCAKPQSVTILINGPAQYAIKQIQDAIRDGLRSVKNAITDGGVLPGAGATELALYHHLLQYLESPDSATQMGVKGRFRVGVKAFADALLIIPKVLAINGGHDPQESITQLETESKLSGTSLIGFDINTGRPVNTVDMEIMDNYCVKRQCLSSSVIIASNLLLVDEVMRAGLSSLKQ*
>comp233676_c0_seq1
MHMILFYNYVKEILASKILRLQSLTMYLVF*
>comp16519_c0_seq1
MIVALYCTGTTFLWLNLSLLLTSFILGGFFNLFAYRDALCGCIVGDRTYKA
>comp478210_c0_seq1
MLMVLGINSRSVYEEDFERPFLFQSADFYKMESQKFLAENSASVYIKKVEARINEEAERAKCYLDESTESYIVEVVETELIKKHMKTIVEMENSGVVHMLMHQKTDDL
>comp52647_c0_seq1
MALDFYSSDNFTFTHSIFSELKSFLYNICFLGYLNEIGCFKNDKGRCPDILTATCTSRSIAS*
>comp35239_c0_seq1
MMAFFFCAVEDKGMYGQKFSSLHRSISESHHKFPQEGRKTHEDNE*
>comp7996_c0_seq1
MTDKGKIGIVGSGLIGQSWAMLFASVGYSVSIFDILPEAVQKAKINIKAQLDDLEQKKLLRGTLNGKQQYEKINMTTSLEECAKGAIYIQECVPERLEFKKDVFSKLDKVVGPTTILASSTSTMMPSSFSEGLKNKKNVVVAHPVNPPYYVPLVEVVPAPWTDPSVPVATKKIMLEIGQCPVVLSREHPGFALNRIQYAIFVECWNLIKQGILSVEDVDKVMSEGLGMRYAFLGPMETAHLNAEGMEAYYNAYRETMWSVIQTFDPPEKFEGPTADSIVQQVTEKIPLDQLAQKRQWRDKCLTQLSILKNQMK*
>comp15420_c0_seq1
MV**F*DFTCKLIVSILFHTTSLVIW*SEN**RSNLSMLFFSFDIHKAYCNTSIAWCFQLFCTRHPSNSLNGIRKLNFASVIHLNYS*
>comp54493_c0_seq2
MFPFHCRYICIFFNKVQFFTCCYLPLQSDTFCFNSRLFSVLFFPILLVCLRYSLRLLLCYFLLLKLSAIPYSLGFRSMLLSICFCFLFGFLCLELGIAS*
>comp39613_c0_seq1
MTKQEIILLLFKKASYYDLWWTLGIQSCDFLD*
>comp33416_c0_seq1
MVDFVLYDKQKKINLVYNLPWLLLIILYFSDSFGSSYWMQKQVPGSRISGP
>comp31413_c0_seq1
MSSYGFYYTTSASNTIINNVIIIFNLL*
>comp58923_c1_seq8
MATLSSSTTESNNQEGAGVEKAIALDENVLQKHVAFFDRNQDGIVYPWETFQGFRAIGCGILLSTVSAIFINFGLSQKTRPGKFPSILLPIEVRNIQRAKHGSDSGVYDTEGRFVPSKFEEIFSKHARTHPNALTSDELMGMLKENRVPKDYKGWIASYTEWKILYVLCKDKDGLLHKETVRAVYDGSLFERMEKEHSADKKK*
>comp14316_c1_seq1
MRDDNGKVGDQFMRQIEPIAAYLPYMVSAGNHEEAYNFSHYRARFSMPGGHENLWYSFDM
>comp320079_c0_seq1
LTKDFTVHHLFHFSPTRQKVQLYVLLPLFFLYLISFSPSISHLAAKPWQPCPNFQGI*
>comp125996_c0_seq1
MFFSSQRINQQAPIKTGENISDTEKIKHQTPPFYFLCFPVHHSILLLKYLTFQVSSHFQLAQITSMMHQMPTTISAN*
>comp130137_c0_seq1
GGVVAISSCFTLSFFVSLPNSILASHQNQHTTFPYLIYENSLLEGRVKHELFLLGLCLTRVIFPLQFTASII*
>comp24307_c0_seq1
MQRN*RYLPFHIFLHITLFLFLLFLLKFHIIIVWCQIRYCISVLVFDLPGSFFSSKNFRLNSQSPQHNNHTNNVVTVLFRIVFY*CFCHLRFSNEIITLHNR
>comp754547_c0_seq1
MRQLVSAVNFMHSHNVVHRDLKPENLLFADDGSNATVKVVDF
>comp170554_c0_seq1
IDRVTFLKESTTEELKNHFSVPECIKTRSYIKPQGQVVKFD*
>comp57801_c0_seq1
MDTLFRLVSFQHQPDQSLNSTSRTSSSSRSSRQNYHYQQEDEECFNFFMDEEDLSSSSSKHYYPYQPHPSTTTTTTPSTVTPTTTANTNTGTPTTTDFSFSPTHDFNFEFSGKWAPDILLETARAIAEKNSARVQQLMWMLNEVSSPYGDTDQKLASYFLQALFSRMTDAGDRTYRTLTSASEKTCSFESTRKTVLKFQEVSPWTTFGHVACNGAILEALEGEPKLHIVDISNTYCTQWPTLFEALATRSDDTPHLRLTTVVTTRAGGSVAAVQKVMKEIGTRMEKFARLMGVPFKFNVIHHAGDLSDLDFSELDIKDDEALAINCVNALRSITAVGNHRDVLISSFGRLQPRIITVVEEEADLDVGFDGFEFVKGFQECLRWFRVYFEALDESFSRTSNERLMLERAAGRAIVDLVACAPSESMERRESAARWSQRLHGGGFNTVPFSDEVCDDVRALLRRYKDGWSMTQCSDAGIFLSWKDQPVVWASAWRP*
>comp43905_c0_seq4
MAFFLCFFIFLLVSSATACDRCVHQTKASYFSKASALSSGACGYGSLALGLSGGHLAAGVPSLYKNGAGCGACFQIRCKNPTLCTKAGTRVVLTDLNHNNQTDFVLSSRAFMAMAQKGMGQQILKLGIVDIEYKRVPCEYKNQNLAFRVEESSKKPDYLAIKFLYQGGQTEIVAVDVAQVGSSNWGFMTRNHGAVWDTSRVPPGPLQFRLVVTAGYDGKWIWAQKVLPTDWKTGVVYDSGVQISDIAQEGCSPCDDGTWS*
>comp239735_c0_seq1
MPDGKSVRAQAVAMRISGDKAAFYNCMFIGFQDTLCDDKGWHFFKDCYIQGTYDFIFGNGKSLYLRTTIQSVAEGLGVITAQARESMADDTG
>comp59923_c1_seq7
MEGKNEEEVEDIESASTGSFIEDSEDDGSSPSEIDDKVHLEEPLTEEEIQDLISELLEVESKAAEAQEALEEESLAKVESEVRQELKQTLQGDDLETAVADEMTIFKEDWEAVLDDLETENAHLLEQLDGAGIELSSLYKWIEREAPNGCCTEAWKRRNHWVGSQATDEIAESIADAEKYLQVNRPVRRRHGKLLEEGASGFLQKKLCDETRDPEKKETEGDWGLFNKIVSDGSGADASFGSKHWASVYLASTPQQAAVMGLKFPGVNEVEEIDDVDGDSTDPFIAAAIANERELDLSDEQRRQFKKVKEEDDVNVDRKLQIRLKHRRYQKKSKQREMCPADLVTESHIQKPSSVDHFSPVMKEGSCDDGKFVSENDKVASLNTKTDKIEGFDTSCHLDKEKPMSTGALSDPLKSSLADVIEQRGTKRLNDGELDTDNKKCRTVITDRDDEADVIEDKLDCNMNTLEDQSEIKDGICNSGADSLPSECLDEKFCCTVCDKVAHEVHPHPLLKVIICGDCNCLMEEKIHAKDLGHDCSECYCAWCGRSSELVCCKLCKTLFCNNCIKKNLGVEFLADAQATGWHCCCCRPNLLQRLSLQLEKAMGSADILLSSSGSDSDISDDSDADINVTISSKRRRKKKIRRILDDAELGEETKQKIAIEKERQERLKSLRVQFSASSTVMSSAGCNWNLSEGASIEVLGDALTGYIVNVVREKGEEAIRIPPSISTKLKAHQIAGIRFMWENIIQSIRKVKSGDKGLGCILAHTMGLGKTFQVIAFLYTAMRSVDLGLRTALIVTPVNVLHNWRQEFIKWRPSELKPLRVFMLEDVSRDRRAELLAKWRAKGGVFVIGYNAFRNLSFGKNVKDRHMAREICHALQDGPDILVCDEAHMIKNTKADTTQALKQVKCQRRIALTGSPLQNNLMEYYCMVDFVREGFLGSSHEFRNRFQNPIENGQHTNSTLVDVKIMNQRSHILYEQLKGFVQRMDMNVVKKDLPPKTVFVITVKLSPLQRKLYKRFLDVHGFTNDRAPHEKLRKRSFFAGYQALARIWNHPGILQLTKEDKDYVRHEDAVENFLVDDSSSDENSDYNVLAGEKMRNANDLLQGKDDSGFFLKGWWNDLLHEKIYKELDYSGKMVLLIDILTMSSDVGDKVLVFSQSIPTLDLIELYLSRIPRRGKRGKFWRKGKDWYRLDGRTESSERQKLVERFNEPLNRRVKCTLISTRAGSLGINLHAANRVVIVDGSWNPTHDLQAIYRAWRYGQSKPVFAYRLLAHGTMEEKIYKRQVTKEGLAARVVDRQQVHRTISKEEMLHLFEFGDDENPDPLAELSQENGHTCDQNNPILVGHSLKHTATHSNGSSYSDKLMESLLSKHHPRWIANYHEHESLLQENEEEKLSKEEQDMAWEVYRKSLEWEEVQRVPLGESMPDRKPEMPNTAPRVSETRSISPSKVRDRFMTRKCTNLAHLLTLRSQGTKFGCSTVCGECAQEIRWEDLKNRDRKVAR*
>comp42652_c0_seq1
MSDVVKEIEDMLQSVGLNLPDESVASTPVASTSPNYGYYEVSIGSSHHPYTNESFDSSTQHSH*
>comp557473_c0_seq1
MEREGYINKTWTNNNQVDAQNTISTRKMFHKKIMLAPNVLWS*
>comp245545_c0_seq1
MCMPGIDEKIHQILMVKKNTRKVLQ*
>comp48647_c0_seq2
MMKSSSGPCGHSNPLLSFSSFVHQHCLRLGAELATRLDEAKRVAGTLAATAKRPPLSLFASLPHPKHALALAATLNSDHVAKSLAGTPVYTVSNSNNEFVLISDADGAKSIGLLCFRQEDAQAFLAQVRSRKREFRGQARVVPITLDQVYMLKVEGIAFRFLPDPVQIKNALELRAANKGGFDGVPVFQSDLLVVKKKNKRYCPVYFSKEDIEKELSKVSRASRGPGVSQHIMVGSLEDVLKKMEMSERNSGWEDLIFIPPGKSHSQHIQEINA*
>comp2011_c0_seq1
MCYILLYSFSMKGCLTDSLCSCTIKYSCKSCLVSQPYYFVLFETITCRFILYFTMFYCRNNCFLNHC*
>comp414187_c0_seq1
MFHHIQLKANQHQATNKKHLKNMYDLYYIAGEVNDNKVITKWVYSPP
>comp33959_c0_seq2
MMQCEDSGVGLLVLSVTIKSINGTLHDNLKLPP*
>comp43878_c0_seq1
MLQPSTTCFPFLHRKTKFLLNQPRSMDIMSGCCRRRRPSNRFSSNSDSSISSFVDMEVSNQFQQVFKLIDTNGDGKISTTELSEVLSCLGYKKCTAAKEAEVMVRVLDFNGDGFVDLDEFMVVMNDIEGKIGSGNEQDDYLMDAFLVFDTDKNGLISAKELRRVLLNLGCDNCSLRECKRMIKGVDKNGDGFVDFEEFRSMMKTGPAN*
>comp53362_c0_seq1
MASSSMSASGSWSAKDNKAFERALAVYDKDTPDRWYNVANAVGGKTPDEVKRHYELLVQDVKHIESGQVPFPNYKKSGGSDEEKRLRNLKFQ*
>comp358794_c0_seq1
MIHGIEKLIYQRNKHENGQ*RVGGFRKYN*PMKDETNRKNLKNAMNMINTSNIKQGGPHHEKTKRFL
>comp48114_c0_seq1
MHCTCISVGKASDNATHWKIAICHVTSYFPRQCNQYEDKAQSTTGQYKGEKRHIHVKHYFFAHSQLDVNPEFFSKLIETCFLQDSTKIA*
>comp31271_c0_seq1
MATIQSDILSAFCKASSTFRSLAPLPRAAACRLLSPSPFRLRAFSTGDAAAVKIPDKPSVCTADELHYVSVSNSDWRLALWRYHPSPQAPPRNHPLLLLSGVGTNAIGYDLSPGSSFARYMSGQGFETWILEVRGAGLSLHGSNSKDIEQSAHAMSEKMEVAAESATNGAVPLKKELNNISCAVSESDISASKGVETENVAVKGDLTRLATVWDESKLVAGLTETFMRLSERVSGFLSENQSKVMSAKLLDQISKLLVDSPLYEQFNEIRGKLSTLLETR
>comp543954_c0_seq1
MSMARAGALVSGELATSDLATIVETLPTPENE
>comp551564_c0_seq1
QLEICIDQYEGSFLFYLLIKKIIQRRKYKIKDKTNF*
>comp17368_c0_seq1
MHEEDIPKTAFRTHQGHYESMVMPFGLTNALATFQCAMNATLQPYLRRFVLVFFDDILIYSKAWEEHLEHLRQVLSTLKQHRYFANLKKCDFGQSEIRYLGHVISMHGVAMDPQKVEAILQWPTPKTIKALRGFLGLRVL*
>comp166602_c0_seq1
MMNNLKLTLKRREMAIMNEVRKSTLKVNQLSPPLELCQCLNLL*TPLS*NIYKANL**Y**TLSRGKQKVQAVTLKIYMSKNFLLSKCSSFKSTLWYFHACFITSTE*
>comp54467_c0_seq2
MDREWGSKPGSGGAASAQNEAIDRRERLRRLALETIDLAKDPYFMRNHLGSYECKLCLTLHNNEGNYLAHTQGKRHQTNLAKRAAREAKDSPAQPQPHKRKVSVRKTVKIGRPGYRVTKQYDPETKQRSLLFQIEYPEIEDLSKPRHRFMSSYEQRVQSFDKRYQYLLFAAEPYEIIAFKVPSTEIDKSTPKFFSHWDPDSKMFTLQLYFKTKPPEANKPQPASTANDIAAPGVPPRPLPPPPQAPPPPPPPPQGLPPGAPIGNPPRAPPPPMPGSLPPPPPMANGPRPAPGGIPPIPPPPPVGSGTTASFNMGTRPPSMPPPPQGIPAQQMQGPGVRAPPPPPHMGQ*
>comp49975_c0_seq1
MSICFFPLIICLLPDMVSLYYLDILDLSFMSLITIAELSSDLVQLCAWLPY*
>comp510433_c0_seq1
LSHQNESYVLLINLCLTGSPKVGLPFFFTPTPLSCFNSLKANGKTYER*
>comp208890_c0_seq1
KDTACCSGIIRCFLFYLVLFSEPHFFPFLWPPAFGLQLYYSFNEYHHPTF*
>comp46531_c1_seq1
M*FHSHQCFFRTWELFTHRGWLVNHFTQC*RVDRSNYLQSIIQS*KYLQAPGVDGWTGLVRCLTYLKTSYTICVHIQIDLRRPFGL*FSALLLKCCSTWERVIFSHLDITQVVRDGWNWNKDFKFIFM*
>comp57091_c0_seq2
MQELLRASEIALARLQRLGIFDSSKVRLEAGPRELPHTANVIVDVVEAASKISGECGVYTKPATSSWTAEGTLKYKNLLGYGDLWDASVAYGANQATEVSVGVYAPRLKGLLTPVVARLSMLSQDWQEFSSYKEQLLGMSLGLISTKHHDLVYTLGWRTLTDPSQMSSRSIRRQLGHGLLSSLKYTFKIDRRNSPIRPTKGYAFLSTTHFGGLTPDHRSLRFLRQEFDVRYAVPFGFYNTALNLGISAGAVFPWGHGFMNKPSPLPERFYLGGDFSPVCTLGGPITLWGFKTRGLGPTEPRRQSRDGINDDNGDSSRWDFIGGDLAVTAFADLSFDLPIRWLREHGIHGHVFAGAGNAAKLTQNEYRHFSPRKFLESFRTSVGCGFVIPTRLFRLEGNLYYVLRQDEHDRGKTGFRFSFSAPS*
>comp49789_c0_seq1
MRERMLTVGCWPVFYYFSPKLMKSTHIEYMNAESVKPKCLTKSNIRFEPEHHLVKAHPYIPDPSSRF*
>comp308329_c0_seq1
MNWPSFLDNYALLSGQLVSISKMLGHDKCPALRNYAVLPLLLSPERDEQLLRLTEHRVPMFSHDLVPDYLRTKPIPEVEQKMVQLEHKATSLSYETIQKQMTAYSKVVGQVWELVSKAREEWETESSSR
>comp48934_c0_seq2
MSSKGPGLFSDIGKKGRDILTKDYNSDQRFTISSSSNTGLDLNSTLVKSRGLSSGDVAAEFKHKNNTVHVKVDTESNVLTTFTISDIVPSTKTIASIRFPDYNSGKLEVLYLRDHAAFTAAVGLNRSPAIDFSATIGTPGIAFGAETSYSTTVGKFSKYNAGLCLKMPSSNASVILADKGDSMKVSYLHQLDHLNGGAVVGEISRRFSTNENTLTVGCSYVVDPQTAVKAKLNNHGNLGALLQHELTPKSFLTISGAFETKALERSPKFGFSLLLKP*
>comp47169_c0_seq1
MTKQNTSFAGIELRIIMYDNIVGSIFKLDEGLFYTNYMLNSEYERQNIAMGTLRKENDEKL*
>comp16265_c0_seq1
MANMPLVLFSLSSSFHPVIFYSLGAMIVRNLKIWEVLLTRLNHSLSTETKVQYIV*
>comp55811_c0_seq3
MGGGGAMRTAAKIAGIGVAKAGIRGATAAHPAEQSVRNASRPVSGAVSSQGARAAGVATPHTAATWEGEDWEFLDGGDLVMEGGEPMPRVVFGAVPTLQEAKAATTELKDAIDKIYLSSNFSQCEGSSPGSQVSVLSATHSESETKPCVIEAISSPTVPKHALQAFQLLSTSTEAQTVVASIACDPNVWNAVMQNPAVNNFFQSHQTVAGFEAEETTEKVEDLGKCARVAGSEAEETLEKEEELPEPHSGNGFFDFKGLLQNLKLTVTEMVGRVSNYLQTIFPAAEKLSADADGNTKSNFMDNKTMGGTFMGLAVLVVMVVLLKRT*
>comp38788_c0_seq1
MNLHRPFVPVLQPNMFPILRRVSLIFYEGYLLDIFDEQRLESLLVNVYN*
>comp62202_c0_seq1
MQITRIATRIVNHELVDLRIGDQFMCFRLQNLTISSPKHTLNRSIQESCGSEIIYIYIY
>comp137860_c0_seq1
MKSLPYNNYGFFNLINLHPSEFLIFFSISLLLHVLVIFFLGTILVIF*
>comp58920_c0_seq5
MERQNAKLSEKARKEDYARIRSLVDNAYKRDPRILRRKEDQRAEKQRKKEAKILAKRLEEEAAARIAEEERRRKEEEERRAAEAALQQKKVKEKEKKLLRKERTRLRTLSGPILSQHLLDISDDDDDVERLCMSLDIEQLRCLCEKMEGKQVLEQAKVLRDALGCKKDVDNKKDEKTDQQNGSIKANGSASLSNIEKKEKPWNKEEIELLKKGMQKYPKGTSRRWEVISEYIGTGRSVEEIMKATKTVLLQKPDSSKSFDAFLEKRKPAAQSIASPLTTREELEGVSTPGKPENSAGSSTNKLEDSHSKSTDSQNTTGSVTANGVSSSLEQDMWSAVQERALVQALKAFPKETSQRWERVAAAVPGKTVNQCKKKFAMMKESFRNKKSAV*
>comp35242_c0_seq1
MADPDPKVTRIGHSILKINPYLLFSILFTPKQHMNHLNKCLIRTEYSIYSIVSSLFNFPTNYHIFTIRT*
>comp16324_c0_seq1
MKDEGIKPDGSSYTSQKILKSIESATKFRADIKCSKDNSGKIQLLEIHLCVKKDGVTLQNCGQSGKAISCNSQDPIFPSAPPPPPPPP
>comp38425_c0_seq1
MVVFLIDLWSRVWLKGPIVWIPKSVAVDTMGRECKKSKSMGQHRSGGSFGTCFLEPTMRGRSLSCFRLRAKGPTRWLRRFPSTVPATIAVAARWSKKGITT*
>comp379045_c0_seq1
MKGIKLFILILVDIYFLFYIPLILIVIILPFMHIDVRIKLIYNSRYICICM*
>comp54712_c0_seq1
MSLYILIRHTIFFKALHSFYGIRVDSNPSLYRSASITGKP*
>comp16288_c0_seq1
MLNQIYNSSQKQTLTHMRVYTLIHFQQAISPTSNVKLHQY*
>comp31871_c0_seq1
MKGTPISKASFKASSTCLSTGCHNCPAFLFLHLPMPAHHDQLTLPSPFPELGTGKVTLLEKRCKVR*
>comp37306_c0_seq1
MVSGDGYGGSGGSWPSNSLRPRLATHVHGIARFGSTLSFSPESRELTDVLFRAGLEKITFFLKSTW*
>comp50222_c0_seq1
MTIIPSDGIDPDLDGIDLDPSDFASSVPLKKVPNGDVFEASRAGDVDRLRYLLESGVNVNARDHWDSVALYYACLAGHLDAARMLLESGAICSEHTFDGDRCHYAALNLKVRKLLKAFEARPPPLFPLQAALRDTFLACPSNWAYSELADPQFRIPGISSTQGSNCSQFPPDVVFIVQGRPIEAHRLILSARSPFFKKKFETDWKERREVRFSREKLSYPALYSLIHFFYSDRLEIAVDEMEDLVRICKVCKCESLQKILEKELIHQKYAEYKALGDVDNSQKRYILQGLSLPEEDRLPAALRQILLIALSSSTHENGQDDGIDKLVSGIDALQMAKSRDDLADVCVRVDRKIFRCHQVILASRSEYFKARLSRMKDFHEGKDELSVDCLPCLEEHDLSMEAFEKMIEYMYTDGLEDINPDQAEEMFDAASRYLLFPLKRAVADVLLPHLEMVSPEELCHWLILADMYGVYKIREYCLDIIACNFETFADTKEFRAMLLTLPPPSGDSSLRTTVPSMPGSVLNTDQGNLLDDLREKWLEIEAAELDQRDESALQFDKRLEMLMLVAEQEKSCNADSDGIDEFTSLAFPQASTLISGEQKEL*
>comp2350_c0_seq1
MASEKKQATTPFQPSNSAINPFVVPSVRYSNEKMREIIATAIMVHEQPFSIVDDEIWIWGFQYANSEFQKITCKTARSDCLALYEAEKKKLKALLKSVSKISLTTDMWKSSHQVAEYMVITGHFIDARWKLQKRVLSFVKMPAPRRGIDVADAIFKCLKAWGIENKVFSVSIDNASYNDSCLRNLKDNLSLSTKLILGGALFHVRCCAHIKFVSARWP*
>comp214581_c0_seq1
MVKPWKTMTLLQGEVEMMTALLCCKARNTTRTGHRRQPYRARAMTTLLQGEDHDNDAAGRGPRQGRWSAKAATMQDGWAAGSNEFGLDF
>comp357935_c0_seq1
MVLESLLPSVPQCYPCCCTSLVI*
>comp279023_c0_seq1
MLKVRDVNISRRVLCQFSRPTEYDEDLKLGISEWQYQYK*
>comp238912_c0_seq1
VFEDSLSFNPFVTLSFCLNEILFLAKILNNKYS*
>comp127673_c0_seq1
MQILIPFRCRSSILVYFCFTSMMCMLYLQVCFHFPFESWKLSHLLLLLKFHTIFPRLSSLFPTDCSYSLVYNLDEKCWPNWQNFSSPNFLSNLSIDCRPSLLDNFEFEKVTRL*
>comp57151_c0_seq4
MAMGDATNTLRILIATDCHLGYMEKDEIRRHDSFQAFEEICSIAENKQVDFLLLGGDLFHENKPSRSTLVKAIEILRRHCLNDRPVQFQVVSDQTVNFQNAFGHVNYEDPHFNVGLPVFSIHGNHDDPAGVDNLSAVDILSACNLVNYFGKTVLGGSGVGQITLHPILIKKGSTAVALYGLGNIRDERLNRMFQTPHAVQWMRPESQEECQVSDWFNILVLHQNRVKTNPKNAINEHFLPRFLDFIVWGHEHECLIDPQEVPGMGFHISQPGSSVATSLIGGESKPKHVLLLEIKGNQYRPTKIPLMSVRPFEYTEIILKDEPDIDANDQNSILEHLDKVVGKLLEKYSKKAVNRAELKLPLIRIKVDYSGFMTINPQRFGQKYVGKVANPQDILIFSKAAKRAKGEGKIDDSERLRPEELNQQNIEALVAENNLKMEVLPVNDLDIALQNFVNKDDKMAFYSCVQYNLEETRNKIAKDSDTLKFEEEDLILKVGECLEERVKERTTCSKDTTQFTAGAQSLEDFRGRIAAGTGSAVSFSDDEDAMQISGKTPSTRGRKGSSRASQTLTRGRGRGRGRGRG
>comp54875_c0_seq2
MFGAVQLGLLAACVVLFVPMGMAGWHLSRNKVLFFSGALFITLAVGVHLTPYFPSVSDFVTSVSSSVVVVDDRDSCISLLHEIEWEVKPSRAFDPLNNNSVNYDKSWSWRRSSSVDSCEFQKLKRADVSDLLNGSWVMVAGDSQARMFALSLLTLVLDSEQMESVRESLFKRHSNYHIVVDEMGMKLDFVWSPYTTNLTNLVMGFKQNHIYPDLLVMGSGLWHMLHITNASDYGVSLQLLRSSVTSLLPISPEFGTDGPVTGSVSVRSPHLFWLGMPSLINSMLNTEEKREKMTDLMRGEYERALQKSNLFRQFGGPLQLLDIGSLSWNCGIRCADDGMHYDGVVYEAAVHILLNALLIDSHQKL*
>comp35179_c1_seq1
MNYMFSMLELPSHEAKQKQEKR*
>comp51729_c1_seq1
MSDALINGLAGAGGGIIAQLITYPLQTVNTRQQTERDPKKDKRSLGTLQQMCQVVKQEGWERLYGGLMPSLVGTATSQGVYYYFYQIFRNKAEAAAREQKRIGIGDGSVGMISSLLVAALSGCVNVLLTNPIWVVVTRMQSHRKDSSKTPPGQGLSDATEQTILSAVEPLAYGTSHVIQEVYGEAGVWGFWKGVLPTLIMVSNPSIQFMLYETMLKKLKKRHARSKKGSNGVTALEIFLLGALAKLGATVVTYPLLVV
>comp34966_c0_seq1
MEGQSSKENPLQPMSFTSGRTRNHVSRSAEDDPNLHCVIASERNGSQWTCLQKPSHNYLEYLAESSTYLPKTTTEDMIGSNYPPVGSINNVNGVNGTHRSFFYNDPGKAYGFKPNDSSTEVDIRKVGNWRLDEGQVREEAIKFESTQHHPYAESHTSWTAESIGDRHNVSQLDPMVMVGAPVFLPKPGCSSSKQKTCATDRQRRQRIADNLKALHELLPNPAEGSQAYILDDIIDYVKYLQLQVKELSGSRLQAESTAIPLVFHEGYGHYINQQMLNEPLEEMMGKLLEEHPAAAGQLLESKGLFLLPMALVEDLRQATQMFGGSELI*
>comp45520_c0_seq1
MARTTQKMCNLNTDTNELQNPRTQKQSLCLSFAKLAENYPPGFPRKVFAETIGTYLLVFVGSGSAALNAIDEHKVSKLAASLAGGFIVTVMIYAIGHISGAHMNPAVSLAFAAVRHFPWKQVPFYIAAQLTGAISAAFTLRVLLEPVRQLGTTSPSGSSLQALIMEIVATFTMVFISTAVATDTKAIGELAGVAVGSSVSIAGIVAGPISGGSMNPARTLGPAIASASYKGIWVYLVGPVSGALLGAWSYSVIQETEKPASAISLSSLPSKLRHIISETEQVGNKDHLSCV*
>comp14385_c0_seq1
MYELLFNAGASCTSFAGSKKNCLLPGRGR
>comp118345_c0_seq1
YCSITDECIHNCHTSLHNIIKQIKKTAYEKKKKPNKHFSLYGSHFWSYKKI*
>comp44497_c0_seq2
MVDGGDFAATICSICYEDLKPIAEDLQSISICGHVFHELCLQQWFEYCSRGKKHSCPVCKQSCRVSDAARLYFQSIGDVNDAVLPQKPVDLEEDAGVLRSQVKKLEVKVSGLSSELERQGKELQDITEELCACKEQAKIEISLKTEALNQKASVQFQLHMKSEELEKSTLECLRLHDRNMALAKELAAFKLVSDLDLDEEEVLKLATLGNGANSKDTIDTLKRSLVMRNRSYKELMAKCNLLGRGEARYSKKLEKAKEKIIKLKARVQELETAAEVKENEYLMSLKVSKKTNCSKNFENSINSNSDVLSASTFSLKEQRKQMLTPKSRMDLTANNADKSLKIENSNVTKKKDVNFSKESITTFSLDEERDCISIDEDASEFTKALPGRPIHYCKDDRDVALSKSTLAKSEAASGIKRETAMQGKCTLAESSRIDIDIEMGNISAGAMDEDMTLLGNVKQVQPMVNIRKESPLTLSNPGDICFSGGLLGPDGTHRYLGKWCKRRLNSESISAKGSSNGDLIAVGADGRGGRIKVLRSPSQSFSDGKENSVGSKRLKFGPKTSSLQSQGCLQIEHFFGRVSH*
>comp4837_c0_seq1
MDNTIARHGIHGLYWLYSIDVSGLLLVGGDNTIYLTQDIATGPFQGIMYDYIRLEGPTPFHPIRKY*
>comp504_c0_seq1
MEIFFLHLYFTLRQHVDTSNFNSSSRLRLLLFRFTRRGTNDSIQTPPQPLELSPSGKWHLDYYLLKVNYK*
>comp488062_c0_seq1
MARVVKEHLLHDHNLVSKVVSIVSPQNLSVKDDTFLNALRASPSYDVVLTVINSDPEHLSIRWDVASDLRRYFQPLLNQVDDISSHGVKSQWLYLLDLGEIPKMDSAGVNVLSFSQLPHIITPLEKRLGSGISKNPCV
>comp58640_c2_seq5
MPLYELYRLARGKLDSKECAADESSAPENDFFELVWENGQISTQGQSSRARKSPSCRSLPSHCLPSHSPKGQDKDVGYATNARMGKFGDLDSGLNEIPMSVPSGEVDLSQDEDVIPWLNYPMDDSLQHEYSSDFLNDLSGVTMNELPASNNFSLLDKRSNSNQVFRASYKNSAHHVSSSEQGIVSKGSSAGEVETAGLKASTSQLYPPLSHQCQTSFAPFRSRVSDITENNTNSATHLAPCGEITQIPSASVGFSSLKMEKQDPIMSSNSSTILNFSHFARPAAIVEANLRSIGLMSGLSSARSESMGNKIKGAAATRSNPPESTFVDSSGEGPKESTMHSQQVMDPSKADLKPLEPKYLEQNAAASKQSDPACKVDASKIDQTFNQVLGESGSKGQEAVEKSMEPAVASSSVCSGNGAERGSDDLNQNLKRKSQDTEDSECHSEDVEEESVGVKKAAPARGGMGSKRSRAAEVHNLSERRRRDRINEKMRALQELIPNCNKVDKASMLDEAIEYLKALQLQVQIMSMGAGLYMPPMMLPAGMQYMHAPHMAPFSPMCFGLQMGLGMGYGMGMPDINGVSSRFPVVQVPQMQGINLPVAHMSGPTALHGMARSNPQGFGFPGQGFPMPMPRAPLFSFSGEPVVNSSALGVNGCGTAGLMETVDSASASGLKDPMPNVNSQVMQSTSGCNSTSPMSTQCEAATVGFEQSALVHNRGHASEVNDSGAVNPGKEDNPVIGKSCELLDNVTVPL*
>comp54689_c0_seq1
MKTKKTSTVEIKLSNRILLVYDHRNQNLLDQHFIGPSGKEDLCQLCVRKRTMYHRDRS*
>comp34038_c0_seq1
MLTKWSTLLTVYIIIRELVTILTKSKIAYQSTN*
>comp53446_c0_seq1
MGSHISKKIPETSSAINLNTDMHYRTELSSYEAACKHDADLQSFDTTLQARTNQVINTLAAGVEVRALSFESLKQVTECLLEMNQEVVRVILECKKDIWKSQELFELVEEYFENSLQTLDFCTALEKCLKRARDSQLLILVALQQFEEETELGDNRHVRTLQELKNFKTAGDPFTEEFFQIFQSVYKQQILMLEKLQLRKNKLDKKLKYIHSWRKVSSMIFVATFATVLICSVVAAAIAAPPVAAALAAATAIPIGSTGKWIDSLWKNYENALKGQKEVISSMQAGTYVAIKDLDNIRVLIDRLEIEIESLLQHVDFAIEEEAVKVAIEEIKKKLGVFMKNVEDLGVQADMCSRDIRRARTVVLQRIIKHPHS*
>comp29377_c0_seq1
MQVRKTGKIMKASKVVLVLNGRYAGRKAVVVKTYDEGTAEKQYGHALIAGIDRYPRKVHKRMSKTKFNKRSKIKPFLKVINYNHLMPTRYNAPEVLPEVKLVPKDLKDPMKKKKYRFQFRVKFEERYKSGKNQWLFEKLRF*
>comp89333_c0_seq1
MMKEKHKRKFSHQSERKMTKVEDPDKGTP*KQP*TRQHREDFNRNVRDVECGFQDGRIP*QESTCN*RKIFSRNFLARRRRGRKKNSEFCELIATEWKENVKRSVMLKGR*
>comp233238_c0_seq1
FFFILKRRNKANKKNHKKEIWILTFNKSDKSSVGIKERKKKIKTNNLLGISVYEWRLVLFHL*
>comp41324_c0_seq1
MKTLFIHTIEKDFLSLAPNQAQASDHITNRSNFICNTKFLFSNNKEEEVVH*
>comp53331_c0_seq1
MSKAWVIRPSVNPYSNSIILVKKKDGGWRFCVDYRALNKVTVPDKFPIPIIDELLDELSNATIFSKLDLKFGYHQIRMREEDIPKTAFRTHVGHYEFLVMPFGLTNAPSTFQSLMNEVLRPVLRRFVLVFFNDILIYSPDEDSHLEHLRVVLQLLRENKLFGNKKKCNFGQQKLEYLGHIISAEGVAADPKKVEAMWL*
>comp279394_c0_seq1
MLTTLEFVSNILMTTRNWFAESYTNFLETSRGGISALNYLVKRGFASSSMDKFCKGMSRLCRDVGSTITASSTAWSISSKMPTDRLPSKRLKLTHHLLNGTSVVFCTLASVSYSVSLGSSDTTTLSSSLSLRPLPSLG*
>comp57737_c0_seq2
MAMEKKEKQSTMPDIVLQIVMVLVMAFIFLFMNDIPKKLFAKLRLRNRADIQAKRHFVQGAQLLARARSSKTKIRSGSNSLAKEALAEAEKAIALDPKDAAAYLLKALSLDLQGFRTSALDSLDVALSPLAVKSLSDNEKGDALLKRAELKMAMTTQRGRVDSALADLTESVKLSPKNAKALCLLGECYEAKKMQEEAGKAYQEALDVEPQLGVAREALNRLGS*
>comp50724_c0_seq1
MFRSLCDKRVSCSYITSLVASHCNTFSTQIMQLPSHQHIPCVGFDSHVYANMLQQSIRNSDPTSGKRLHCDIFKRGACLDVFAHNILLNMYVQFESLNDASKLFDEMPHRNTISFITLAQGYSRSLQFGHALGLILRLFREGHELNQFVFTTILKLFVSMECADMCWSIHACVYKLGHHSDAFVGTALIDAYSVCGHVDIARQVFDGVCCKDMVSWTGMVACYAENYCYMESLQLFCQMRIMGYKPNNFTLSGALKSCLGLEAFDVGKSIHGCALKASYDRDLYVGTALLELYTKAGEIAHAQRFFEEMPKNDLIPWSLMIARYAQSEKSREALELFCRMRQSSVVPNHFTFASVLQACASLVWLNLGKQIHSYVLKVGLDLNVFVSNALMDVYAKCGEIENSVKLFGESPEQNDVTWNTIIVGYMQLGDGEKALNLFSCMLGYHMQPTEVTYSSVLRACASLAALEPGLQIHSFTIKTTYNKDIVVANSLIDMYAKCGRINDGRLVFDKMDKRDEVSWNAMICGYSMHGLGAEALNLFDMMQWTNCKPNKLTFVGVLSACSNAGLLDKGQAYFKSMLQDYGIEPCIEHYTCMVWLLGRSGHLDEAVKLIEEIPFQPSVMVWRALLGACVIHKNVDLGKVCAQHVLEMEPHDDATHVLLSNMYATARRWDNVASVRKNMQKKRVKKEPGLSWVESQGLVHYFTVGDTSHPDIKLICAMLEWLNKKTRDAGYIPDCNAVLLDVEDDEKERLLWVHSERLALAFGLIRIPPACSIRIIKNLRICIDCHTVMKLISKVVQREIVIRDINRFHHFRHGVCSCGDYW*
>comp28294_c0_seq1
MISLTVAEIWTLYGIMVMVVPRYRYFFTATLPIQGCHRPHQK*
>comp513659_c0_seq1
MFIFLICNNYGYHALYLLLCGILHLQEVLFCDICHQGGTHVKRLTQL*
>comp21529_c0_seq1
MLNKCCPTCRAPESLVSWLSSDLVFPTPAYKSRNGVRLTPNTLFKLLNSLIERKRHTKKEMQSTKEKLSNMASAAKEHVDIYKAKIDEKAEKAMVRTEEEKVIAHERSKAKEAKAKMELHEAKARHAAEKLRTKQSHHYGHHEPPLVGAHQPPLVGTQYQGHQPVGAVPMPGVTYPTYPLGGNLPRNKHI*
>comp151230_c0_seq1
MIAACIRVCGKTFSCLHPCLENYYGNGLFWNLKCSTIEFYYVVLINKNCEISDKFC*
>comp5802_c0_seq1
SIYSSRYIPSNITTHTHKRQQVLRLKGSIEYKIIKSVSTY*
>comp25637_c0_seq1
MFESAGYNKGVSVLAGALVNEVSKGKTQPQNGGWA
>comp44901_c0_seq1
METKISTLITGKTNNLPPPIRVLSVLHIVQVIQLLYIKVQAFLHTQHQLQMKRY*
>comp41452_c0_seq1
MEHLAVSIVAVPMVNCYLDSMVDLQTVLVDQKDRPMAVEVDRLGDRNGGQVRVEQTQLLRCKEQPDK
>comp33299_c0_seq1
MDNARDGALFCSVVKFSKLTLFYFLMNKSISEGKAHSQFKIMASHQHLALELKS*
>comp25406_c0_seq1
MPEFMDISFRAERSIQDELVRESAAAVYTIVISYILMFVYITVALGSYRSFDRMFFVNSKIMLGLGGVLVVLLSVSSSIGIFGYVGLPTTLLTIEVIPFLVLAVGVDNMFILVKTFMENVNYSSDVAECVGHTLRIVGPSVVLTTFSEATCFAIGGWTDMPAVKTFANYATVALLINFMLQMT
>comp59329_c0_seq8
MVHSAYDCFELVGDCPSKIEAIESYGSKLLLGCSDGSLRIYAPESPHSDRSPPELRKEAYVLEKNLVGFARKPLVSMEVLESRELLLSLSESIAFHRLPSFETIAVITKAKGSNVFCWDDRRGFLCFARQKRVCIFRHDGGRGFVEVKEFGVPDVVKSMCWCGENICLGIRREYVILNATNGAFSEVFTSGRLAPPLVVSLPSGELLLGKENIGVFVDQNGKLLSEGRICWSEAPAEVVIQKPYAIALLPRFVEIRSLRDPYPLIQTVVLRNVRRLRQSNNSVTLALDNSIHSLFPVPLGAQIVQLTASGNFEEALSLCKLLPPEDSSLRAAKEGSIHIRYAHYLFDNGSYEEAMEHFLASQVDITYVLSLCPSIILPKTAIVHEPEKLMDIYGDASYLSGGSSGVSDDMEPPPTSHMSESDDIAALESKKMNHNVLMALIKYLQKKRYSFIEKATAEGTEEVVLDAVGDNFASYNSSRFKKTNKGRGSIHVSSGAREMASILDTALLQALLLTGQSSVALELLRGLNYCDLKICEEILRKGNHHVALLELYKCNSMHREALELLHKLVEESKSSQSEITHIFEPEAIVEYLKLLCGTDPILVLEFSMLVLESCPSQTIELFLSGNIPADMVNSYLKQHSPNMQAKYLELMLAMNENAISRNLQNEMVHIYLSEVLDWHADLSAQQKWDEKAYSPTRKKLLSALESISGYNPEALLKRLPPDALYEERAILLGKMNQHELALSLYVHKLHVPELALSYCDRVYESMHQPSVKYPSNIYLTLLQIYLNPRRTTESFEKRITNLLSPQNTTIPKVGSTTLVKTKGGRGTKKIAAIEGAEDTKVSLSSTDGSRSDGDADEFSEGDTTIMLDEVLDLLSRRWDRINGAQALKLLPRETKLQNLLSFLGPLLRKSSEMYRNCSVIKSLRQSENLQVKDELYNQRKGVVKLTSDSMCSLCHKKIGTSVFAVFPNGSTLVHFVCFRDSQNMKAVAKGSQSRKRL*
>comp41499_c0_seq1
MMRMPYLLWLSVIMFYINYRKQYY*
>comp26106_c0_seq1
MPRNSLKIFSPLKIVYASCCLFIFMLTFSFLVSLEVPYFFLFCCLDQ*
>comp32099_c0_seq1
MTFQPAQVQHRVSADFNINNIEQWNMMHFINAYEPSLPVVNTYSVNYLSPVVSSSKMDEVKIKICNDYD*
>comp477897_c0_seq1
MQLQPWTLMDYVLVEVEKYDRKALFFAPSPFSKI*
>comp57722_c0_seq6
MGSSDDPNNKPSSLYDSSPSQPLLAKPPYPSPIEEPPQESDSNQYLHISYNHGPRSFKDIPFLILFLLFVLCTFAFGIFAIFHRNTNYPSLSSYTYNSNTTSCVKYSTSSPNWVWLDSSSSSHIAKDLTWTLVITLILSLPICWGLLLLLKHYTKQIVYASLPFFIIVPIFLNVYWFVACTVSSACSDAFPLAYRILVLVFIFLIIGVIVWIFVVNWHRVELTVSIIGVASNALSWNLGLFGVLPCLTIGLVVYYAPIVVFMVFARFNGKIVPKNSNGEFACVWKQDSWVAAYFALAILTMLWSASAMLEAQVFVINGTIAHWYFSKEDETPRRSIRNSVRNAFGPSSGTVCLSGLLICVVRMVRSVVDSARQEDAPGIVNLVLRCCVNALLTAVDFLNKFTINFAAITGEAYCSSARMTYELLRRNLLSAVFVETISSRLLAGIVFVLSAIYTIVACAILKAVTNLGPDSYFVAALAWVLLILVLGYFVHVLDIVIDTIYVCYAIDRDRGEVCKQEVHEVYVHLPISRSLRQSITTTTLGV*
>comp519383_c0_seq1
MITIRVMGYCLVGRLISIWTFWIVIHVQTTSSLFIMIISTSSIIMVSLTRAIQWTVWFQFTVEEKQELRCNDSKHSIFNRV*
>comp36680_c0_seq1
M*VSSLLTFISNSFLNLLSFRARNQNYRLQLSEAREDEESHTVTAVNTRLLGLGYYLYLLN*EENNSKIQSGTCNFMFNTVFYD*
>comp46340_c0_seq1
MAAGKVKVAMGFQKPPQTPPRHNQQPPPPPSTANKSSSHKSSFSRSLGAYFPRSSAQVQPRPPDLTVTDLLRLVEDLRERESRLKTELLEHKLLKETVAIVPVLENQLIARETEIQSNAKKMEEMEAENERLKKELEEFKLRIQQDKRESQRKTKALEDEIAELKKKTDELSSSHRFQGIVEVSLSVRSNLNKSLKKMAMAMASDHGSGNQKQVEGAAAVVDFKRESERQRHSRCDSEELAESTDSVLTNVVRSRVPRVPKPPPRPSSSSPHSPSSGSSDSASAALSENNVKTEHVIPQPPPPPKLAPPPPPPKAASQAAPPPPPPP
>comp42999_c0_seq1
MEATKGAGGRRGERKKSVSKSMKAGLQFPVGRIARFLRKGRYSQRLGTGAPIYLAAVLEYLAAEVLELAGNAARDNKKNRINPRHVLLAVRNDEELGKLLQGVTIASGGVLPNINPILLPKKTGAEKTEKSTATKSPKKN*
>comp50583_c0_seq1
MSSSYFSVMDLNRFKYTAGFDRRVFLIHLEL*
>comp377749_c0_seq1
MLTSKAIVQHLMQFHVMLDNFNFLLELHN*
>comp48785_c0_seq1
MVRILVGAKMHREIDELRELILVSQPFHIAHPCIISLVRILAKSGHADKAFFHFKSLRTRFPTVHPSLLLYNVLLQSCLKENRPDFVKWLYRDMIASGVKPETYTFNLLIQSLCDSGALDHARQLFDRMSEKGCQPNEFSFGILVRGFCRAGLTIQALDLLNHTNHNANLSPNRVVYNTLISSFCRDDLTDEAEKLVERMREQGLSPDVVTFNSRISALCRAGKIFEASIIFRDMQMDEELGLPRPNIITFNLMLKGFCKEGMLEEARALVDTMKKVGNFMTLESYNTWLLGLLRNGKLSEARLVLNEMVATGIEPNTYSYNIMMDGLCRKHMLSDAKRLMDLMVSNGVYPDTVTYSTLLHGYCSKGKVFEAKNVLQEMIRNSCLPNTYTCNTLLHSLWKEGRTLEAEEMLQKMNEKCYQLDTVTCNIVVNGLCRNGKLEKAVEIVSEMWTNGPASLGKGNSFGGLVNSIHNVSNSFPDVITYTTIINGLCKVGRLEEAKKKFIEMMAKQLHPDSVIYDTFIWSFCKQGKISSAFRVLKDMERNGCSKTLQTYNSLILGLGSKRQIFEIYGLMDEMRERGISPDICTYNNIISCLCEGGKTKEATSLLHEMLDKGISPNISSFKILIKAFCKSSDFGVACELFEVALSICGHKEALYSLIFNELLAGGQLSEAKELFEASLERFLALKNFMYKDLIDRLCKDERLDDANCILHKLIDKGYGFDHSSFMPVINGLSKRGNKQQADELAKRMMEFASEDRIANRTYRNEKSIIPRKLNKDGGSDWQDMVHRDDGSGIALKTLKRVQKGWGQGSILSLQPQQNDFLDM*
>comp239588_c0_seq1
MYYGDPHFLEACYTPSYLVNHMLTHVIGLFSG*
>comp208826_c0_seq1
MICFPFSSLPLLFLHCVCVIHFISFVSNLDSQRVE*
>comp52391_c1_seq1
MELIDVLILSLAFLFLHSWWRYWSTTGGGPKNLPPGPPGWPIVGNLFQVILQRRHFIYVIRDLREKYGPIFTMQMGQRTLIIVTSADLIHEALIQRGPLFASRPADSPIRLIFSMGKCAINSAEYGPLWRSLRRNFVTEMITPLRIKQCSWIRKWAMEAHMRRIQKEAQDNGFVQVMSNCRLTICSILICLCFGAKIAEDRIKNIESILKDVMLITLPKLPDFLPVLTPLFRRQVKEARKLRKKQVELLAPLIRNRKAYVESDGKLGGAEMASPVGAAYVDSLFRLEVPGRGRLGEEELVTLVSEVISAGTDTSATALEWALLHLVTNQEIQERLYREIVECVGKEGVVQESDVEKMPYLGAVVKETFRKHPPSHFVLSHAATKETELGGYTIPADASVEFYTAWLTEDPNMWEDPSEFRPERFLSGDGVDVDVTGTKGVKMMPFGV
>comp35959_c0_seq1
MGIIVKNKTNGDITFYMKGADVVMRDIVYHQDWLDEEVTNMAREGLRTLVVAKKSLTPEQYLDFESRYNKAKALSTDRSSAMSSILAQLERDMELVCVTGVEDKLQDNVKTTLETLHNAGVKIWMLTGDKLETAICIAKSSMLVSRKE
>comp42505_c0_seq1
MASIYSCTECGSNLNLNPSHAFPPDFYFEAGNKGTVSFSAVDSTKFRFEKEDKIRPFFETLNYWGIQRKRTKIKCNSCGRLVGYVYDDGPPLTDSPGQFHLGPSQVIPRAPRYRFKTKALRITSQS*
>comp203644_c0_seq1
MELSLTPASTSSGKSGKAVRSQARAIIFSVYQYVKGLKDGGILGKNVIVHEETAKATSVSLSTVNKVIAEGNKALQETGSPAFITPKKPRGRPPTLECDEFSEAAIRHKISEFYIVKKQLPTLRSLVVALREDEVIDCGRNFLTKRLHKLGFYWKKCQSSRKILVERPEIVNWRLRYLDAMKEFRAQGRYVVYLDETYVNESPEER
>comp56440_c0_seq15
MQNIPYQFSMAHLPNCKIKIILHNLKGACWTVNSVPSTRVHTSHTLCGGWMAFVRANNIKVGDICIFELVHECELCVHIAGVGKDGLDCQFGKVAFSRSSAGDAVTCHKSSRYMLINPKSKCIRKVDLSDKNWSKIGQEAVLSIDLKKSGRALNTSTKMGLCPQSKAAHKKLAVQRGHRVEDELSTQAKAGLRMLFALDEQRVAQAFASSFPSFVKIMKKFNVSGSYTLKIPYKFSAAHLPTYKTEVVLRNSRGECWAVNSVPDAKGRTVHTFCGGWMAFVRDNDINFGDTCIFELDAQCEMQVYISGVGKEGLDQQNGQVKLNRLAIVSSMSKHSCV*
>comp20993_c0_seq1
RGLSTHTKAHHQSHTETKEQERRKEVLTRGSYRGRKELTARVEGYL*
>comp49480_c0_seq1
MEKMNRAFEKVKMLVGMEVEDEEQQGAALENNNSFAFMDDFNRDCTLSTKQRLYGFAICFAAGLTFTLLSLLVFFKPIKFGITFTLGNLLSLGSTAFLIGPKRQVTMMLDPVRIYATAIYIASMIIALFCALYVHNKLLTLLAIILEFGALVWYSLSYIPFARSMVSKIMVSCFDTEF*
>comp50248_c0_seq6
MFESPSINRILGAQLRDLSALEEHEIGGRKPPYIKFHGVLKIKRATHLVFHLFSLFLWFFLDFFYVLDGEPICYFVSYFYHELDFYI*
>comp101510_c0_seq1
MSLIPSFLSGRRSNIFDPFSLDVWDPFEGFPFSSTVANVPSSARETSAIASTCVDWKETPEAHIFNADLPGLKKEEVKVEIEDGSVLQISGERSREHEQKDDRWHRIERSTGKFMRRFRLPENAKMDQIRATMENGVLTVTVPKEEEKKPEVKSIQISG*
>comp56885_c0_seq1
RERKIDRYKERRKWSCGDPQLRTIQREIWERVRGRAWGRGESEGLAAFHEDQYSRINSSSLTCRKPEIIKTKTFKPKQKKNVRRKESKKENSCRKHTQKRIDSLGLKIKIEVWVDW*
>comp232315_c0_seq1
MDRETPQTNNFIQS*EYYTQIIVTDSS*TLYMLNYCAR*
>comp36128_c0_seq1
MKSPSCNLGKVGKTIHKTSPPSSPQEEDESPIRAIVCLKICDDMKRFEETEDCFILGFDPFDPVDLSKKLLLDKNNPVTPHYDDASDLSVIAEKGQVACRDYPHSRHLCLKFPFNTTPHESYCKMCYCYVCDSAAPCMYWTH
>comp231291_c0_seq1
MFLYKDRIYYTNSRPYLMERGAKENIKWQ*
>comp43075_c0_seq1
MASTSRPGSSSELTITVESNPSKSRLSELGINSWPKWGCPPGKYMLKFEAQETCYLLRGRVKVYPKGSSSESVEFGAGDLVTIPKGLSCTWDVSVAVDKHYKFESSSAPTPSSSSPSY*
>comp288676_c0_seq1
VAIARHLNATLIVPELDKTSFWADFRFCTLVLLS*
>comp144861_c0_seq1
MGLQGEQGPYGPPGIRGAPGPRGPNGFKGIRGLPGTSGEPGGPGPKGDAGFTGLPGQKGEPGAASSKGQKGEPGPIGFPGPTGPPGVNGRPGDKGDRGRDAVGEPGQKGDRGEPGIDGIPGIDGQPGEKGDRGLPGYPGKPGREGAKGNPGETGQPGMDGKDGSVGLQGETGLPGRDGEKGNMGPQGIPGLPGDKGVTGPPGFKGDLGFPGPRGEKGNPGLPGREINLMGEKGEPGPPGPPGKQGDRGLRGIPGVIGLTGKDGEPGQPGAV*
>comp83956_c0_seq1
MLHEALLCRIILNFRVFHVCQMLQLSFQVCISVLFILLHVTKKNHFLNYLEKLVPFKFYLLHGYFK
>comp520525_c0_seq1
MEVVALVLRCKRRIIKGVWTKMMDESTKSQSVAPTSRKVVYFDVLGAEFCLSSCLNLAKGD*
>comp40302_c0_seq1
MKWQGLKTFVMLPVDKLGTYNELKLSTAIGNCCLRNRSHLYFLILMQTLDIRTYLFYLVLLNCVY*
>comp2041_c0_seq1
MFIVFGDPHAHLAQVCFFYFLFVYVYVGPPCEGVTRVLVLIHITKKLWMCHYKLNIIDIYDFRALFFIFC*
>comp55197_c4_seq1
MTSVCISNCINDARDPRVPVRATYVNLYKWPESDAEFVRSVSSNGRKISQMYGHPRVVDSISCRQMYLRSYKFSRKETMPEKTQKCFGRVKEHVAYGKKRKPDRDQGGKRKCLVWRKAKEISCSALFRIFHRFLSCSASVDVVDEKD*
>comp2698_c0_seq1
MLLKKLE*KELGVGRGLAYEIRKHYLICF*CGFS*EKPFPCFIYDGSNLLTKSNMLLQIVKMPHLF*
>comp59108_c0_seq1
MQQEIQDFVTKYQICQQTKYPTAKPTMGLLQPLPIPTEVWSVISIDFITNLPKSAGFIAIMVVIDKVTKYGHFVASRPKFTAPIVAKAFISSVVKLHGFPSIIISDRDPIFLSKFWRQLFQFSGASLNYSLAYHPQSDGQTEVLNRCVEQYLRAFVFSLPYCMVILPPLG*
>comp58684_c0_seq3
MASAATGWYRGRVKAVPSGDCLVIVAMASSKPGPLPEKSITLSSLMSPRLARRGGVDEPFAWESREFLRKLCIGKEVTFKIDYNVPSINRDFGTVFLAEKNVAALVVSQGWAKIREQGQQKGEVSPYLAELLRLEEQAKQDGLGRWSKVPGASEASIRNLPPSAIGDPSNLDAMGLLAANKGRPMEGIVEQLRDGSTLRVYLLPEFQFVQVFVAGIQAPQMGRRAASESVVESELTSDDTNGDVPGEPRAPLTSAQRLAVSSSAETAADPFAPEAKFFTEMRVLNRDVRIVLEGVDKFSNLIGSVYYPDGESAKDLALELVENGLAKYVEWSANMMEEEAKRRLKTAELQAKKSRLRIWTNYVPPPSNSKAIHDQNFTGKVVEVVSGDCIIVADDSIPYGSPLAERRVNLSSIRCPKMGNPRRDEKPAPYAREAKEFLRTRLLGRQVNVQMEYSRKVGPADGSAVPSGAADSRVMDFGSIFLLSTAKVEGDDAPSSVPPAGSQQAGVNVAELIVSRGFGTVIRHRDFEERSSYYDALLAAESRAISGRKGIHSAKDSPVMHITDLTTASAKKARDFLPFLHRSRKIPAVVEYVLSGHRFKLLIPKETCSVAFSFSGVRCPGRDEPYSDEAIALMRRKIMQRDVEIEVETVDRTGTFLGSLWESRTNVAVTLLEAGLAKLQTSFGSDRIPDFHLLEQAEQSAKRQKLKIWENFVEGEEVSNGATVENKQQEVLKVMVTEVLGGGKFYVQTVGDQKIASIQQQLASLNLKEAPVLGTFNPKKGDIVLCHFLADNSWYRAMIVNTPRGPVESPKDQFEVFYIDYGNQEEVTYSQLRPLDPSVSAAPGLAQLCSLAYIKIPNLEEDFGHEAAEYLSE
>comp349491_c0_seq1
MSIVLNINSIKHNNPNKRLDHRGSFGFPNGFAKEEGLMIGE*
>comp530384_c0_seq1
MFIERQRAIIFWSLTRPKGSGSSSKERHVVPHSLRSFGKMSAGCPRMTNNLELSFLRLRSKSSKHCSRNLHLLIPTFDDPANHGSRINMHLKVVAFERPCFK
>comp58640_c0_seq1
MMSRMKVPSMMLPMTMQQQLQMSMMAQMGIGMGMGMDMNTMSCANIPGIPHLLHPNAFMGMASCDASGGDRLQGAPATVVPDPLSTFLACQSQLMTMDAYSRMAALYQQLHQPPASSSKN*
>comp22851_c0_seq1
MRSSYIILEILFVAMQLGIIAQHEKSLNNCFNNST*
>comp165538_c0_seq1
MWLPTPIVVNFLGYCNFGYCNLILILINPLWAGRTFMVDY*
>comp57820_c1_seq1
MRIQSLINQKPNCRHSNFNVAGNFPLADPPSQPSHWGW*
>comp44125_c0_seq1
FYFSFHLSRVNLFSLYNVLGCFLCRKLVYV*
>comp544698_c0_seq1
MLSPSLVSVVARLLKLGLDMTVGATELFLTDSAKVLGLGPISKNVVLLAWVTLG*
>comp421145_c0_seq1
MKELPSPVLHLPLPSVFIISLRIPAEWHTGHSRDEASPTHRGHNDTTKSTPFQVPHCLR*
>comp37811_c1_seq1
MVQISLSFKFDFLLFFSSFTYLCNFKLLRWALFIFIGGLVSYWLN*
>comp43744_c0_seq1
MVFRSDMMKEFTDTADAQLSKPITIIRLAPEKVTKLFKSAYICNVNPTPPGGVTH*
>comp3087_c0_seq1
MSSWNLNYTRVWAHMSKVFKDYIPSDPGLEIWERPKDVKCRAADVDIAQYMTYLLATYLALPANEAFYELFVNNTEDMQGMISVNTSEVSIPRKTRAEKLYFLEEMVDGLPKSWDWRKQGAVTRVRDQGICLGGSWAFAVVSVMESAYFLKTRKLVNMSEQSLIDCSWDFGNSGCFSGSPKSAMEWIKHNGGLPLAAEYGTFQQGHGYCLASKCKPTAPIKGFVRVQPTSSAVKSALVQHGPLVAGIFAPYDLRYYTSADGVYISAQEAQQPLFVTLIGYGSFND
>comp27892_c0_seq1
MLTAVVSITRLTLDDLQDRAHEVHNSVMPLKELRFPLYSSLVAIES*
>comp58081_c0_seq1
MMSRSYTNLLDLASGNFPVMGREFKERRRMPRVMSVPGIVTELDDDQAVSVSSDNPSTVSMDRMIIVANQLPLKAKRREDNKGWSFSWNEDSLLLQLKDGFPEDMEVLYVGSLCVDIDLAEQDDVSQYLLDKFKCVPTFLPPDVLAKFYDGFCKRQLWPLFHY
>comp39710_c2_seq1
MDDAFKFILQNKGLATEVNYPYQGVDGTCNANGEANHAGSIKGYEDVPANSEKALLQAVANQPVSVAIDASGFEFQFYLHGVFTGSCGTNLDHGVTAVGYEVSDDGINIGW*
>comp53340_c0_seq2
MGISVLARRLYHHHVEIRRLFIVGMFIAIIVVFQCFALPSWRTYSLLDADRLSIALPVEVSIAATTRRDVSRSTVTHVMPNVTYVSNSKEGLDYELEFDGDRNSRKGFIFEKGEVLNKSFEVENHEDEIYSFTQKKPKYAYDTIEKAREIDNRYNIQRQANNMQFASQGIPSKGIKTPDADLSTSDLLVTLKKSSNGSGMQSMEMQLKSEKSHLLKTTLSVSNNKSKMGTRSTRSKLVWPTTITQMNSLLLQSFNFSSMRPRWSSQRDRELLSAKLEIEKAPVISKFSGLYAPVFRDISKFSRSYELMERKLKVYIYREGEKPIFHQPKMRGIYASEGWFMKLMEGNKRFIVKDPRKAHLFYLPFSSQMLRVTLSEQNLHGKQMEQYLERYVELIAGRYRFWNRTGGADHFLVACHDWASQVTRQPMKSCIRSLCNANVAKGFEIGKDTTLPVTYIHSMMDPLRGLPGKPPSERPILAFFAGSMHGYLRPILLKYWENKEPDMKILGPMPRNVEGKRIYMEYMKSSKYCICARGYEVHTPRIVEAILSECVPVIISDNYVPPLFEVLKWEAFSVFVRERDIPSLRDILLSIPEEKYLALQLGVKKVRQHFLWHRIPVKYDLFHMILHAVWHNRLSQIRPR*
>comp246226_c0_seq1
MGSCNEKQSSQSRESRPVLQATRALSTDDHHTTLRVNNKHILMVTITTITTCISVYEFDYTR*
>comp60122_c0_seq3
MNPDGYVKVKCIAASSRSESQLIKGLVFKKHAAHKHMPTKYKSPRLLLISGTLGHSISGLSSFDSMDQENDYLKSKMELIEMCHPNVILVEKTVSRDIQEAILARGMTLVLDMKLHRLERVACCTGSPILSCNNLNGQKLKHSDFIYFEKFVEEHAFAGEGGKRPIKTLMFIEGCPTRLGCTILLKGTHSDELKRIKCVVRCAVVMAYHLILETSFVVDQRAMFSTIPAENVADILPTNQQSCNSASVESSIPSVEYSAKNGPVSNDIPISNGFHEKSRNGLNLESKEFSPFSYEPYNPAIFPGFSAISSSLKKVMGDSFPFASSAPYESLSAYFGFNGIEPGGQVIKSISILESAEEDDNSRTEAKNYSNEEKSLNGGKSLSLPVHLDSNWDKSKGSDDDKNQIQSKDDINAVLDSLSILVLMSTRNALRGTVCQQSHFSHIMFYKNFDVPLGKFLQDNLLNQTRLCDTCQELPEAHFYYYAHRNKQLTIQVKRLPQEKCLPGEAEGKLWMWSCCGKCKSGSTKRVLISTTARSLSYGKFLELSLSHYSSSSRKSSCGHSLERDFLYFFGLGHMVAMFRYSSVTTFTVSKPPQKLEFSGAIKQEWLLKETENVYMKGTLLFTEVANCLKAIRVQFDGSTLNLGGSIREFSEVEKMLKQEREEFEVNIKNAIAKNGDPNRAAYKLLSLNRLMWDLLIESCVWDRRLYSLLSTDCLRIESDVTEKVTQENSYSMMEGTAGRQTGSVGNFMEDDNVNGSANAKVMSDTSVEVNELPTKEIPIRGPLLECNEQDDPSNAINVPQNVKMPIVGDLRSRRSSDQKLKLSLDVFTQAPSADGNLQEKDFVISNHLQVHENFPVSTDSQTSHPVADLNVLNKSAFLHSPVSNLQDSNEWFWKPFPDIRQIGIRGFQKRFLPKFESVSSSITEYLPTAHQLITEEGTRLHIPLRTENHVVSDYEGELSSIIACALAYLKDSSVVSEVDDEDYRREIGIDSKSTESSHGSTHGATLTSPHTFSRSSSDSDSVHSTGSTSSEESRASRAQENHSIEIAMGYAKSLGREKYSVICHYVNQFRELRNWCCPSELDYIASLSRCRNWDAKGGKSKSFFAKTLDDRFIIKEIKKTELDSFLGFSSLYFKYMRESFESGSQTCLAKVLGIYQVTKRHIKSGKEVKHDLMVMENLTYNRNITRQYDLKGALYARYNSAADGAGDVLLDQNFVNDMNSSPLYVSHKAKRLLQRAVWNDTTFLNSVNVMDYSLLVGVDSQKRELVCGIIDYLRQYTWDKHLETWMKSSLVVPKNVLPTVISPKEYKKRFRKFMSTHFLSVPDHWCSKKFTNPCKLCGSGEDDASQQKS*
>comp43654_c0_seq1
MDLGHGPLSEPATPTTPRANLVLSTSGKALLVSNSNKSLVLSNSGKRFDNNKKKYVKQVTGRHNDTELHLAAQRGDAASVRQILAEIDDQMVGTLSGAEFDAEVAEIRSAIVNDVNELGETALFSAAEKGHLDVVKELLQYTTREGLSLKNRSGFDPLHIAAIQGHQAIVQVLLDHDPELIKTFAQSNATPLISAATRGHADVVDQLLSQDPSQLEISRSNGKNALHLAARQGHVNVVKILLGMDPQLARRTDKKGQTALHMAVKGVSCEVVKLLLDADAAIVMLPDKFGNTALHVATRKKRAEIVNELL
>comp362181_c0_seq1
TVFTRRPYVKISLTIPSSQHARLNSTPIDTITFVFVSGKYI*
>comp54985_c0_seq2
MPETNHDDPYAFMVDLCRISPSQEQLLHSSLFVGDTANSHQGDQPPPSSGIVMVSLPKTQDGGKDSSGPQDVFHTPPEESSLPTSDDQRRKVAVDRCAVNHAVDDGTHGFVDFCRYSESEGAEFVDLGRDSDLGFSEVQLTQGIDGDFITECSRVVERDGVGEISNCQFHEFGVLETELCLCDDDLGELPLKKLKLSEQNSGFGSLRDCFGVESQKVEEGMWNLEGKMKMVPEPDTESPCNFGADLRPEKTVLDGERVSVDAGNEDNACGEISMDKNLGFGENVKTQVVQSETVGSGGDVNFCEADKLPCTVEGNKSCDEVNETSERQKRSDEEPGLRVLPSSIRGCLENAAKELESREGGEEEKRCIFYVLKVLSEKSDEVEDSLGNVSLLEAAKLSGITFPCPRWWRDKDNYGKHRIV*
>comp11030_c0_seq1
MMLFHYLLPYGSATLKILGDNVTCSHLVSLH*
>comp56929_c1_seq2
MCFAVIIITIMMHNMTPSISPNWLTHDQIFDKWKSINVITSNKFSAQKKNVIASNNARFPSYPTTNGKGLTLTVSIYTNV*
>comp54592_c0_seq1
MALNVNLNLIIHRPFPPSCIFIRPPISHHTHSNPSLLLHSKTPTSLSLSLCGCAASPPSDASHSSNPIFLPYLQQEEEQEEEEEEEQEGIEAREEELEQSHDPDDPIYKFFKTRTWASSQDPQNEGKLSLQKNRRISWHLAPDTDLVEEPEMGLDDNPLLVEQKEQMGAQKELPLPEGIVGEIVQIARNLPENLTLEEALSGYEGKVGETECLEVLGLLGEENLLLSCLYFFQWMRLHEPSLVTPRACTLLFPVLGRAGMGDKLMVLFRNLPSTKEFRDVHVYNATISGLLFSGRYEDAWKVYESMETDNIHPDHVTCSIMTVVMRKLGHSAKDAWQFFEKMNRKGVRWSEEVLGALIKSFCVEGLMSEALIIQFEMEKKGISSNAIVYNTLMDAYCKSNRVEEAEGLFVEMKAKGIKPTAATFNILMYAYSRRMQPEIVEKLLAEMQDLGLKPNAKSYTCLISAYGRQKKMSDMAADAFLKMKKVGIKPTSHSYTALIHAYSVSGWHEKAYAAFENMQREGIKPSIETYTALLDAFRRAGETHILMKIWKLMISEKIEGTRVTFNTLVDGFAKQGHFMEARDVISEFGKIGLHPTVMTYNMLMNAYARGGQHSKLPQLLKEMATLNLKPDSVTYSTMIYAFVRVRDFKRAFFYHKQMVKSGQVPDVNSYKKLRSILDVKAAIKNRKDRSALLGIINSNMGVLKAKRKKDEFWKYKKRHVKKA*
>comp2236_c0_seq1
MVET*LLSAVGPKL*RTDNCSHLTRSFGKFQELV*VLFLWKQTIHQAYLQKHMPSLAPMKFFEYWLVHICIN*
>comp57159_c0_seq11
MRGHDWINTSLPDELIIEIFRRLDSKSSRDACSLVCHRWLRLDRLNRTTIRIGATGSPDLFVNFLSTRFSNVTNLHIDERLSITLPVQHGRRRANDNSTVSSLKVHCVTQKNGSEESDLDSPCLSDAGLAALGEGFPKLQKLSLIWCSNVSSEGLISLARKCTSLKALDLQGCYVGDQGLAAVGQCCKQLEDLNLRFCEGLTNTGLVELALGVGKSLKSLGVAACAKITDISMEAVGSRCRSLETLSLDSEFIHNQGVLAVAEGCPHLKVLKLQCVNVTDDALEAVGASCLSLELLALCSFQRFTDKGLCAIGNGCKKLKNLTLSDCYFLSDKGLQAIATGCKELTHLEVNGCHNIGTLGLESIGKSCQHLTELALFYCQRIGDVGLLEIGQGCKFLQALHLVDCSSIGDEAMCGIASGCRNLKKLHIRRCYEIGNKGIIAVGGHCKALTDLSIRFCDRVGDGALIAIAEGCSLHHLNVSGCHQIGDAGVIAIARGCPQLCYLDVSVLQNLGDMAMAELGEHCPLLKEIVLSHCRQITDVGLAHLVKSCTMLESCHMVFCSGITSAGVATVVSSCPNIKKVLVEELKVSQRTKRRAGSIISYFCVDL*
>comp54373_c0_seq2
MASVEHIRKWIMNIVAVGVVLGLWSGVGAAPQVPCYFIFGDSLVDNGNNNQLSSLAKANYLPYGIDFGGPTGRFSNGKTTVDVIAELLGFDGYISPYATARGQDILKGVNYASAAAGIREETGQQLGGRISFSGQVQNYQRTVSQVVNILGDENSAANYLSKCIYSIGLGSNDYLNNYFMPQFYSSSRQYTPQQYANVLIQAYAQQLRTLYNYGARKMVLFGVGQIGCSPSELAQNSPDGRTCVARINSANQLFNNGLKSLVDQLNNQLPDARFIYINAYGIFQDIISNPSAFGFRVTNAGCCGVGRNNGQITCLPLQTPCPNRREYLFWDAFHPTEAGNTVIGRRAYSAQSASDAYPIDISRLARI*
>comp40014_c0_seq1
MIHHQSSSFILKHSSSPPFPSFEPNFLHPFETTSLLQKNEPHPTNPSIKNFWGAYCSQAGKFHSFYPFMSLGHGIVHHFCFYFVAIGFNRGR*
>comp25502_c0_seq1
MAQVCGSLVFMNFIFYNMLCSPLSQFDFLVKSCDQNQTIIVILEK*TCRVVFYASMLLLS*
>comp90220_c0_seq1
MKQLISTFPCPCGSQIEETSTSKIFIIKLVGSDFKCNGSLFLSGMFSVQVISVMSM
>comp59543_c0_seq4
MVPLPAGIYIQDISHSKAELKLPSISGSPIIDPHVSPDGSMLAYVRDCELHVLNLLSNDSKQLTHGAKGNGLTHGLAEYIAQEEMDRKTGYWWSLDSKYIAFTEVDSSEIPLFRIMHQGKSSVGLEAQEDHPYPFAGASNVKVRLGVVSVAGSSITWMDLVCGGMEKQNNEEEYLARVNWMHGNTLTAQVLNRHHTRIKIVKFDIRTGQRKNILVEEHSTWINIHDCFTPLDKGVSKFSGGFIWASEETGFRHLYLHDANGTCLGPITEGEWMVEQIAGVNEATGLVYFTGTLDGPLESNLYCAKLFVDGSQPLQVPLRLTHSKGKHIVVLDHHMRTFVDIHDSLDCPPRVLLCSLEDGSIIMPLYEQSFTIPRFKRLQL
>comp47758_c0_seq3
MYTETFDQSIKDKHAKICSETLDGSGSSKHSDSNPEVIDGSGSSIGSERQIDVITRGGSDKNNYSDTHINGTESISASVRRSSSSSSSESSLDDFFQMDAFNITTSGASTPASKSEKNYVSSSESSAKSEVDNSSPVPTSTSQVYSVNYNQMGMSPTISPPIQVMDRSGGYDPSRIPSSVFERNTTPVEWSIASNDSLFSIHLGNNSFSREHAFKFGELGMSEELTKSGELNMFSRTPSIIIEEIDTARKSVEVEDLKTTETSDEAFELEERLREDQNEIKKSHQATSCKLSHVSSLSHGSGTSVRSFAFPIKKRAWPFCYCSNCSWAFCYYKSPICYLRWPTCNCSNCGWAFCYCWNCSHTKWCCHASPILTEAERNSSVKTDVPRQQSYKQESDVTSNSTAGCCNWFQYKRASEVTSNSTANCCNCFQCFSCPSCTWHPSCTWCNCCRC*
>comp482664_c0_seq1
MLQCMSFAYVWSHKKLWHAGGCFNFLCCGKCFWYVNFALNSLQNVVTCRLFP*
>comp19831_c0_seq1
MALNYPSNSPELGAIQTLFGAGFKQFRAVQPLFVASENLKMKRKGAKSPFHSFICFILLFYFTCAQTPLTTTKYLICVELLVF*
>comp17477_c0_seq1
MYGIYYSTNSTDLLKKAKNFTTTQSMLIKGLGACEKYMIDVGLVGPLGSGPLTAAPVTVTTGNDPQAPPKRLAAVLDRHNDTLLDVSWSSSCFNMSEQVGYFLSIKDRVTGRTTYTTYRPTNKTEFKHSTSIRHGGSFEIRVKTDKEGSRE
>comp59056_c0_seq2
MAELDARRACLLSNSATVIQKQIKTHFSQKTYVALRKSSIFVQSICRGELARRSYYHMKRVAGAVRIQRYMRGKLARKKYTEIKISILVLQTGFRAMAARDKLRYRKQTSASTIIQSYWRRHRALFDYQNLKKVSIISQSRWRGRVSRDKHKQKVLEKSVENESPSVKESSNPFQEESSSPYQDSETIQAIRDSSSPFQDTEKIEALTSEVINLKVMLQAEKKRADECERKYVEAQGSSEELRKKLAETEKRVYQLQDSLNRMISSMSSQVAELKMILSTSSRLSSTFRPIARVDVASSNSDTSSTDSDFTLSAPLSNPEAFSSPKPSSFQLVVQDISAVEGSGSESEKEGSFDDFF*
>comp16622_c0_seq1
EPKAPKILDKVLFELEREKKSTS*
>comp28713_c0_seq2
MLLCRIISPSFFFLRGWKMLVFYSLINWESNLNLLISCQNNRSLVVSYNLISI*
>comp206865_c0_seq1
MERVGIWVEVLGLICGNDFLIY*
>comp50969_c2_seq2
MASPHPNNVGILAMDIYFPPTCVQQEALEVHDGVSKGKYTIGLGQDCLAFCTEVEDVISMSLTVVTSLLEKFKIDPKQIGRLEVGSETVIDKSKSIKTFLMQVFEESGNTDIEGVDSTNACYGGTAALFNCVNWVESSSWDGRYG
>comp263770_c0_seq1
MKEKNRVTDAEKIMSPIMIFEIFNLQFCF*
>comp56168_c0_seq17
MPLLTFPLFPSHFPSLSFFPNTPPFSPTRRYSSLSGLKLKVTAATANTHQTGTAILWFKHDLRIDDHPGLLAASNFPSLVPIYVFDHRVLSRFSDEMLELVLFAVEDLRKSLKDRGSDLMIRFGNAENVIQQLAREVKASCVFAEQEVEFELRLMMDVVNEQLKSVIVSEGIPRIQLCQWHTPFYDGKVLQNLPVSYDDFKKLGLPVTKPLQMSTLPGADMELDWGALPIYDDIKEFMSTCNPRKSGENWNSIKETSAETLLRREISKSSESSERSYSFRNVLSRKLDESVFVTQRGNAVGGGTNNVLNALAAYLRYLEGTARDDWQEVHEKVRASESRNGASFIGLFGPALCLGIISRRRVHYEAIKYEKERNAGFLSPFGYSAATIAAAVDAVCSKEWYWLMALRNQINNDGMHSTRIWRWNGFLIEYTVAGDDGPAVLLVHGFGAFWEHYRDNIHGLAGAGNRVWAITLLGFGKSEKPNVVYTELLWAELLRDFLVDVVGEPVHLVGNSISGYLVAIVARIWSVLIKSVVLINSAGSVIPRYTSIPLFRDRQTSGASWLGSRLLLFYLRLRIQEIVKKCYPTRMERADDWLINEMLRASYDPGVLVVLESIFSFNLSIPLNYLLEDVKGKVLIIQGMKDPISDSNAQVATLKEHCDGVIIKELDAGHCPHDEVPERVNPIICEWILSVESNILTGCPV*
>comp44101_c0_seq1
MVTALAFLIPLFHNDSCFFCFFQILISSPVRCTNIYSYDLKIID*
>comp205931_c0_seq1
MGLLPLSHQRKPPFPSSHQNPPVPSPSSHSLSSSMYRDYCGSYYSPPTVSFTGLEPISLPSSNYASTISCTTTSNSLPFYQNQESMASVSPMQYYPIRDSLLMFGSEGSCSSSDGSCSQVSHGREIKQEEMGYQNYMSSGFDEYSNKFMLSYGSINDGGENINQWTEKSSGYFGQTQTPLDYDLEDIKQLISSSSSSFNIDENKT
>comp33000_c0_seq1
NSYWNLVLVGVFLKLQFIIPQIIFFSSSLFDLGRDQCHQSFNL*
>comp33653_c0_seq1
MGRCLNFVILLKVFKFSFFFFCIKISLSSLLVNFYLYVLQK*
>comp617_c0_seq2
MQLLSRMISLSCCRQYSRLPPNVSSFGGRQRILCSSRWDILIGVATNNLDRLRNEDKRIEGFHPIYDC*
>comp240494_c0_seq1
IIIIIIFYLLLRVLTGSDFCEWLLEDIVFLSD*
>comp10361_c0_seq1
MFVLKKELSLVQMLNSGHLLVKVRGLQRRKLSIMPFGNASELRDPQSLHDSLLGKDVKVVFVLRTCSTKKRVENE
>comp54767_c0_seq3
MLNSLATKAANSLNEKFATGEVNFTSTVTLYGLVQCTPELTLFECNMCFRSAIAYVPNCCDGKQGARMLLPGCNIRYEVYPFYNSTATLAPPVVQSRPSGRFRVEVILSFVIPIVAAMVLFTFGICSVMRKQGRNMIQLWKK*
>comp55451_c0_seq1
MALPHSTSSLATIVTLSSPRNQITKALPVFSFTKAQFFTKQTRPNRPRSRNLSLPLPRVAAPPTIEPEQSFPETERSEIEDEFGDESSSSKFSWRNHWYPVSLIEDLDPLVPTPFQLLGREIVLWYEKSNSQWVAFDDKCPHRLAPLSEGRIDEDGNLQCSYHGWSFDGCGSCVKIPQASPEGPEARAVRSPRACATRFPTMVSQGLLFVWPDENGWEKANASEPPLLPDDFGRPEFATVNIQRDLFYGYDTLMENVSDPSHIDFAHHKVTGRRDRAKPLPFKMDSRGSWGFAGANDGNPKISAKFVAPCYYMNKIEIDTKLPIVGDQKWVIWICSFNVPMAPGKTRSIVCSARNFFQLTVPGPAWWQVVPRWYEHWTSNKVYDGDMIVLQGQEKIFLSKSNEGAGDINKQYTNITFTPTQADRFVLAFRNWLRRHGNSQPEWFGTNNQQLPSTVLSKRQMLDRFEQHTLKCSSCKGAYEAFQTWQKILIGATVVFCATSGIPSDTQLRIVLAGFALVSAGLAFAFNELQKNFVFVDYVHSEIE*
>comp50746_c0_seq5
MLSMPKTPFIVVGLSEALGAATGMAAGAMLSGSSIPILSQTFLVWQILLSVIFLGRRYKVNQLLGCFLVAIGVVITVASGSGAGHSLKEAGIFWSLLMIVSFLFQAADTVMKEVIFLDATRKLKGGSVDLFVVNSFGSAFQALFICLLLPFLSKLWGIPFSQLPNYLKDGAACFLNVGTLSSGCDGAPLLPLLFIIVNMGFNISLLHLLKISSAVVSCLASTFSVPISIYVFTLPLPYLGVASSLPTGFLAGAIILIMGLLIYAWTPSNGSSSASFLPST*
>comp39008_c1_seq1
MCLMPGKWYTKGFFLYLIFLSSPSCSAT*
>comp154911_c0_seq1
MRSLYSNMRDMTHLRMAISTHPTGT*
>comp111132_c0_seq1
MAKMKDQFRQYHEVQYSVEPTIKKTQREMIGAKLKDMKISGFAKYLKIKQDEIR*
>comp54383_c0_seq2
MAWPIPIIPSLHSGKQTGESNIIWKVFNKITFICKELKVRASESLFFNFITQNFIGLFADAVEFNLATTIRIEYPRKFPPPNAAMQIIYSRLFYYNKFYFVLHKIYFEYDKKQCASSRQILKLPKKWCTKII*
>comp2458_c0_seq1
MSSIGGMGSQSTNSITYFDCGNGAVSLTANAKNRSKK*
>comp54228_c4_seq1
MVPIKMYNETKHPLLLLQCPMHKEKYKRLTDRMSKFMNVCL*
>comp52521_c0_seq3
MPWRRCFKRQEALIPVSIRALNNICAHPNMSLSSSHKFSTQKSIQLEPLNYLSHNLCSPPNYVAQLEASIQSKSLSEAKKIHQHIIKNNTHIMDLSILDKLTRSYITCNEIELARHVFDEIPNPSVVLWNMMIRAYAWNGPFEQAIDLYYQMLELGVRPTKFTFPFVLKACSGLQAIEVGRKIHEHAERLGLESDIYISTALVDLHAKCGDLIEAQRLFNSMPHRDIVAWNAMIAGFSLHALHNETIQLVVQMQKAGISPNSSTIVAVLPTVGLANALRQGKAMHAYSVRKIFCDNVVVGTGLLDMYAKCHHLSYARKIFNRMNQKNEICWSAMIGGYVICDSMRDALALYDEMVRIYGLNPAPVTLASILRACAKLIDLNKGKNLHCYMIKSGIDLDTTVGNSLISMYAKCGIMDDAVRFLDEMISKDTVSYSAIISGCVQNGYAEKALLIFRQMQLSGIDPDLATMIGLLPACSHLAALQHGACCHGYSIVCGFTTDTSICNAIIDMYSKCGKIHISREIFDRMQRRDIVSWNTMIIGYGIHGLCTEALSLFHEFQALGLKPDDVTLIAVLSACSHSGLVMEGKYWFNAMSQDFNITPRMAHYICMVDLLARAGNLDEAYIFIQRMPFEPDVHVWGALLAACRIHKNIEMGEEVSKKIQLLGPEGTGNFVLMSNIYSSVGRWDDAAHIRTIQRHQGYKKSPGCSWVEISGVIHGFIGGDQSHPQSASINKKLQEMLVQMKKLGYRADSSFVLHDVEEEEKEQILLYHSEKIAIAFGILNISPSKPILVTKNLRICVDCHTAIKFMTLITKREITVRDASRFHHFKNGICNCQDFW*
>comp59360_c0_seq41
MGLPSVVHNGVQIPFNITLRMLRVLHPASPSKCSGVHFVHHHISAFCSVYHCRSRAHSVPILCSKRTGQEDQLPASGGKRISAQPNDDISNIETSRAHSSVKNAQESQGHETYSSSVRTAALWVCTAVAFGVGLGFKDGVGKASEFFAGYILEQSLSVDNLFVFVLVFKYFKVPMMYQNRVLSYGIAGAIFFRLTLILLGTATLQRFEAVNLLLAAILLYSSFKLFASEEDESDLSKLCGEDMPEIYPCNNIL*
>comp203365_c0_seq1
MVSFGATLLISVKQKPRNTLTSLLKHYSSTDTCTVLIMVVFSLPMVTFQAYIRFPTSNKRQGMLFELFPI*
>comp292843_c0_seq1
MNSALMSQTRIGTWIVKIYQVGKIAHLIGEAERQSIEILGISEMSLGPSNLDSAAVLCELLELW*
>comp41182_c0_seq1
MNEVFRHFLRKFVLVFFDDILVYSRVHSVLHVSLLKKSVAA*
>comp495203_c0_seq1
MCAINWEKFISKLPAMSMLLVTYYAA*
>comp53860_c0_seq1
MFTDDKTFNSLGRRVFDIYIQRKLVLKDFNIAKEAGGVGKAAIKKFTAVVTSNALEIRLYWAGKGTTTIPFGSVYGPLISAISVDPDFVPPPPLENGSSIPIGVVVAIVAAGAIIIVLIFGILWWKGCLGLKSSVAKELKGFDSQTGSFTLRQIKAATNNFDKAFKIGQGGFGPVYKGVLSDGTIVAVKQLSDKSKQGNREFVNEIGMISALQHPYLVKLYGFCMEEDQLLLIYEYMENNSLARALFDANDDTKKCQLILDWQTRQRICVGIAKGLAYLHGESRLKIVHRDIKATNVLLDKDLNPKISDFGLA
>comp50093_c0_seq1
MGEECHKFTQNSKITIKATSQLSQSINYKER*
>comp59552_c2_seq13
MEAKENGPNEQHSSGGVIDGPTNPMVTPLLTDLYQFTMAYAYWKAGKHQERAVFDLYFRKNPFGGEYTVFAGLEECIRFIANFRLSEEEIDFVRESLSASCEDGFFDYLRGIDCSDVEVYSIPEGSVVFPKIPLLRIEGPIAVVQLLETPFVNLINYASLVSTNAARHRNVAGKSKTLLEFGLRRAQGPDGGVGASKYCYIGGFDATSNVAAGKLFGIPLRGTHSHAFVSSYMSLDEIIDKSLRRKDGSSTCEDFVSLVQTWLSKIQWSNSLCGIFGETNQSELAAFTSYALAFPDNFLALVDTYDVMRSGIPNFCAVALALSDLGYKAVGIRLDSGDLAYLSCEVRKFFCSIEEEFGVPGFGKMTITASNDLNEETLDALNKQGHEVDAFGIGTYLVTCYAQAALGVVFKLVEINNQPRIKLSEDVSKVSIPCKKRCYRLYGKEGYPLVDIMTGENEPSPKVGERILCRHPFQESKRAYVVPQRVEELLRCYWPGSSDKKRETLPALRDLRERCIKQLEQMRPDHMRRLNPTPYKVSVSAKLYDFIHFLWLNEAPVGELH*
>comp42805_c0_seq2
MR*NLKPRIC*LKCCLESCSHQIIWKKIV*KRQNKLKRRLPI*C*SLWNKMNKVALRCLLFMSFQCNLP*
>comp40591_c0_seq1
MPPHVFTHLLNILFHTWSRSHFPCFLILLLLGGIIYPNAGKGIFMLFSLISVLGAMCPRPLVPLTCSFTFIKFQFCLF*
>comp54761_c0_seq4
MSWGHDDYMYLVAKENGNTLPPAALFIIRYHSFYPLHKEGAYTHLMNEEDVENLKWLKIFNKYDLYSKSKVRVDIDKVKPYYLSLIEKYFPAKLRW*
>comp24962_c0_seq1
QIDGTNEHLNRDSKNNGCLAYQINRLPETVWDFQPIQAFQVRVSDR*
>comp351580_c0_seq1
MLRGDAAWVAVLALWWLFVVWELFRQRLRGLVAVFNVAESLYGLQAVKTHGWLLLLAGDRK*
>comp33309_c0_seq1
MLVNDRLIEDRLFGNTRISLSSLRNSSPENIVGDSNHPEQPMVKGELLLSYEIVPREGANPSDS
>comp45818_c0_seq1
MSEDLKRDYVVSEEIGRGRFGTVFRCTSIDSGDPFAVKSIDKRVISAGDSLDAQCLFTEPKILQLLSPHPHIINLHNLYEDETHLHMVLDLCSESDLHSRVMPEPEAATVMHQLMQAVAHCHRLGVAHRDIKPDNILFDDVDRLKLADLGSAEIFKEGEPMSGVVGTPYYVAPEVLDGRGYSEKVDVWSAGVVLYIMLAGFPPFRGDSAVEIFEAVVRANLRFPNRVFHSVSPAAKDLLRRMLCKDVSRRFSAEQVLRHRWFSIAEQNIPTG*
>comp55407_c0_seq1
MVEHQLGTKLKVVQTDGGKEFSPFTKYLQEHGILHRFSCPYIHEQNGSAERKHRHISETGLTLLAESSLPFQFWGEAFVTATYLINRLPTPILHNKSPLEVLFQQKPDYHFFKTFGCACFPHLRPYNHHKLDYKSTRCVFLGYSPNHKGYKCLAPNGRIYISRNVIFDESAFPFKTHMSDFLPPAESATLTPCTPPPHIPTISPPPIQHALSINAQSEPLAPSHSPSHLIANDYSSDRLVAPQSETTTAVPLNTHSMITRAKSGIYKPKVLTATAEPASVAEALSQSHWKNAMISEYNALLQNHTWSLVELTPD*
>comp35290_c0_seq1
MSLLVVFRATTNYMMVTGPWLIEYCTKLNPFLEENKEDPNPQIR*
>comp32980_c0_seq1
PQLYCFFFIPNFLKTHQIRPQPLIKKNSS*
>comp382705_c0_seq1
MTTLPFLAVPDFEKNFVVETNASGRGSRGCNNLVQCLKSLSEHSRKHIVGSFKVTAFATYQL*
>comp309334_c0_seq1
MYPKKKCSIGLSVGLGCRCTFLSCLCVGLGTWVSVYVCEYVFLVVGIPAIRLRVWVCDAG*
>comp42565_c0_seq1
MAILILFSYQKLRRLVVLSRTAVLERDLLL*
>comp55970_c0_seq38
MKSFCPVCYEYLFDSIKGTSIMRCGHTMHTECFHEMATQNQYRCPICTKTIFDMSQGWRRLDREVCETYFKYFQTSFFFGQYMSGFN*
>comp44215_c0_seq1
MEGAMPLCKSVTSHAPPPPPLGLFVGRTRGIKSSQCSFLAGNKVSFPRQRAQSAQLSHKHTTHGGALRATCQADKILVANRGEIAVRVIRTAHELGIPCVAVYSTIDKDALHVKLADEAVCIGEAPSSQSYLLIPNVLSAAISRKCTMLHPGYGFLAENAVFVEMCREHGINFIGPNPDSIRVMGDKSTARDTMKKAGVPTVPGSDGLLQSTEEAIRLSNEIGFPVMIKATAGGGGRGMRLAKEPDEFVKLLQQAKSEAAAAFGNDGVYLEKYIQNPRHIEFQVLADKYGNVVHFGERDCSIQRRNQKLLEEAPSPALTPELRKAMGDAAVAAAASIGYIGVGTVEFLLDERGSFYFMEMNTRIQVEHPVTEMISSVDLIEEQIRVAMGEKLRYKQEDIVLRGHSIECRINAEDAFKGFRPGPGRITAYLPSGGPFVRMDSHVYPDYVVPPSYDSLLGKLIVWAPTREKAIERMKRALNDTIITGVPTTIDYHKLILDIEDFRNGKVDTAFIPKHEEELAMPPVKMVPASRAKELAGTTA*
>comp53175_c0_seq1
MIKKEKIIQVFILPIFLNPSPKLISLTHTLSGPTQILAAPFSHFPFLFFFFFSFSFLSFPSSPLSQTHFFFTCAAPTCTEPGSRPAAPCRIVHKE
>comp49823_c0_seq4
MDCGAVPSLFPLHRCKTIHLVRHAQGIHNVEGDKNYKAYLNPHFFDAHLTPLGWQQVDNLRKHVCTSGLMKRVDLVIASPLMRTLQTAVGVFGGEGYTDRMDVLPLMVANAGNSSRAAISSLNCPPIVAVELCREHLGVHPCDRRRSINEYQFLFPAVDFSLIDSDEDIWWKANVRETKEELAARGLKFMKWLSTRKEKEIAIVTHSGFLFNTLNAFGNDCHPLVKKEISKHFANCELRSMVIVDRSMTGSDASTTNYPGKIPSGLDLPSDVADENNKK*
>comp14740_c0_seq1
MMKQLFSFVTYCYVNSQDNFSHKLSLEEINSFTHCVRLEEIILLA*
>comp5489_c0_seq1
MSPYEALYGINPTPIPGYSAGNSSIDTVDTALHHRQELQLQLKVHLQKAQAQMKQVVEQNRSNKEFQVGDWILLKLHHYRRQSLAKRLNYKLAKRYFGPYPIIARVGAVAYRLQLYQ*
>comp184518_c0_seq1
MLIRKSEDMFYSINIITVQGQKSGTLFQAVVPKDKILEELYASQTIYVLFQR*
>comp50832_c0_seq1
MDWMGTLHCNCGCVAVKEISKIVILRLRLWLGRFPKSRC*GCNCGCLCYNYNSFFFFSYTFLFSLLDLVLG*YSVQIRC*FICCICCYSLLIELWTISCCIVHSDEKKDLS
>comp608353_c0_seq1
MELHKTHKGQTPSEAELHYLENAKKLAMYGVDLHPAKDSEGVNITIGVCSTGLLVYNDKLRINRFAWPKILKIAYKRNYFYVKIRPGEYEQYEQTIGFKLPSHRAAKKLW
>comp46919_c0_seq3
MLIRSLLSSKLRSLRCFSSETPHVLKPGDVLRQTRLFTNEDVLQYSKVSLDSNPLHTDSAAARNVGFEGPLVHGMLVASLFPRIISSHFPGAVYASQSLNFKFPVYIGDQIIGEVQATNLRENKNRYLAKFKTRCFKNGELLVIEGEAVAILPTLTVEQGHCKEQ*
>comp39983_c0_seq1
MLLDHMLYMLNVNLLMFA*
>comp24588_c0_seq1
MYMPLESHAKQQNKKNAKIKSILNNKGILKSPRITTQVKFHWS*
>comp254202_c0_seq1
HPERAPYDEVDTRSSTETPETCFRIYRSGQKKRQVSLRRSSGIPEIGASSAYRISGQEEIGQ*
>comp413_c0_seq1
MECTQTMRNVKQFLKITLINSIQFDFTKICTSLYFPCFLFFFFH*
>comp204437_c0_seq1
MQPEKDEHFEIELFSPTGGSRLGRVNRCAVTITNDDDFYTIMDRLALMTNMNLDAIQVHRESWWQQIEESMLVNGGDTKNAKPVDYLMHFLSFFWKVLFSLIPPPTIMGGWLCFIVSLICIGLVTAVIGDIATIFGCLVGLDDTITAITLVAMGTSLPDTF
>comp33331_c0_seq1
MRERMERFVVLPFSFGCASHSSVELGAPTRPKADSKAPIIPRRQAGEDRSVTAKMKTIRPSSGFLVLPKPNVAAGIQRLIRGIKSLSQLFFYKEDIEEMEPDMEIGYPTDVKHVTHIGIDGSTTTNNIKGWDNLKAPELLSFSPISFKQFELAMATQAHQPLITDPSSKFG*
>comp155786_c0_seq1
MFYSHNNFKQIRNVKGDLSLPNYILIPTEWLLNTFKV*
>comp43818_c0_seq1
MQLVEVPTMHHQFTAVPHDWFNHKSLILIYEYKLRMLGSFLCD*
>comp40236_c0_seq1
MSTWELKSALFLLFLLFISSTTTCGNRIQARNRSPCKRLVFYFHDIIYNGKNAKNATAAIVGAPAWGNRIKLAEQSHFGDLVVFDDPITLDDNVHSTPVGRAQGFYIYDKKDIFTAWLGFSFVFNSTHHYKGSINFAGADPLMNKTRDISVVGGTGDFFMARGIATLMTDAFEGEVYFRLRVDIKLYECW*
>comp32759_c0_seq2
MPMRLQEYLLSPKGRSLTVRNGLILLFTNNLRLGDSRK*
>comp210949_c0_seq1
MFTKFKTQDPDQACPFFDGEPYWTKWRLSWSFSFWRFHEVRHRLKDVDRALLFQFQNRNSRLFHLLSRHR*
>comp34795_c0_seq1
MLGQAISMLVPQVVGYKLVGKLSQYATSTDLVLTITKNLRSLGVVGKFVEFFGPGVAELSIADRATISNMCPEYGATVGFFPIDDNSLQYLHQTNRDSNKINAIETYLKVSGMFRDFTNAAEDPTFSQVVELDLGTVVSCVSGPKRPQDRVSVTEMKPAFTQCLTNRVGFNGFGLKEDALKRKGSFLHEGKEYTITHGSVVIAAITSCTNTSNPSVMLGSGLLAKKAVQAGLTVAPYIK
>comp164951_c0_seq1
MLHCICGCLHVWKIASFVCWVGLCYTGITLLHSSFRIIQC*
>comp450882_c0_seq1
MLGAWSHLLLGLGCGHYVVTSSRINGFILFNSRAKRAGQKTN*
>comp31614_c0_seq1
MRIRLLTSDPPLTPQWLEPRDWAALYLNDLALIEGASFSSYRKNKNCE*
>comp5787_c0_seq1
KILHTAWHPTENIIAVAATNNLFVFQDRL*
>comp51261_c0_seq1
MFSFALFQFLFIILSCLSINWLLPSLIQITVEDSNELGLTSINTQIKTCRVNLE*
>comp57555_c0_seq2
MLADPKEARGGVREVHFLPFNPVDKRTALTYIDADGNWHRASKGAPEQIMTLCNLREDAKKKVHAIIDKFAERGLRSLGVARQEVPEKTKESAGGPWQFVGLLPLFDPPRHDSAETIRRALNLGVNVKMITGDQLAIAKETGRRLGMGTNMYPSASLLGQDKDANIAALPVEELIEKADGFAGVFPEHKYEIVKKLQERKHICGMTGDGVNDAPALKKADIGIAVADATDAARGASDIVLTEPGLSVIISAVLTSRAIFQRMKNYTIYAVSITIRIVFGFMFIALIWKFDFSPFMVLIIAILNDGTIMTISKDRVKPSPLPDSWKLKEIFATGVVLGSYLALMTVIFFWAMKETDFFSDKFGVRSLRDSPKEMMAALYLQVSIVSQALIFVTRSRSWSFVERPGLLLVSAFFIAQLIATLIAVYANWGFAKIEGMGWGWAGVVWLYSIVFYIPLDIMKFSIRYILSGKAWLNMLENKTAFTTKKDYGKEEREAQWALAQRTLHGLQPPETSGIFNEKNSYRELSEIAEQAKRRAEVARLRELHTLKGHVESVVKLKGLDIDTIQQHYTV*
>comp51885_c1_seq2
MNQTPVLSHYIEPENFCSSNRELLDNGNISGSVWAPEHMHK*
>comp51554_c0_seq1
MKP*IPVS*TLCLAVAVAA*HIIRKLIRRRSSHRMPATQPGNKATTSTLLAFTPRQVLLGTRTMKQQNGDNNGSSNGTVNLKREQKLLLHHSIAYYLGRIGFSKTLKKFRSEAQIEKDNLEGSSVDLEEMCLKYLEICGKDAKPNINNQKEQVVHTKNKEEGNLIADMEITSKKKKKKNDKNDSGSVVHQSGTDESFKGSKNSEEKTNNSGPESKVTSKEKDTDNKCKERKKKKGKLVSGSLANNVEDKQLESPTMITEVKEKDDVSVDAKIVNGAETDKRSKDKKKKKDKPSSHGVAIEQIGDPNETVSKKENFKASNEEVADKEKKDSKKRKRPSSEENGQQVADNKADEEPKRRKIENLNESKGGKHSAKTNANLGSDLNSNEENIGVSGQVGGDQFQKTSQEQTNGKTNGDLENAGEKSSVQRSQKKQQKGSVEQKSVKAFQRVQIDKVEYADERLQNNSYWAKDGAETGYGAKAEEILGQVRGRDFRHEKTKKKRGTYRGGQIDLQSHSIKFNYSDDE*
>comp381349_c0_seq1
MALLSKNKVKFIDGSIVAPAIGDPLYSVWERCNTMVMSWLTHSLSPSIAQSIM*
>comp128099_c0_seq1
MSCMIVFSIFFIKFKTECLTLNRNIEEKKVFKKFPKSRCGCKWSAFVVLVG*
>comp14572_c0_seq1
STCAGCSLLVVLLLRRLLPPLPFSIVVSIVPIGAHTTFIGRRRIILVEFVRGVLAGEGSFGRLTRDGPELAKPAGGAQFPDDFISVLIRP*
>comp319752_c0_seq1
MEVNDGLLVTNLPAHLINTTELKLWNSYQWQPLQTYVTISKHFMVKANGIRFQGTVNDCNSVMQQLFFHGGEHGAVLTLTLNDMGNHGCYPDCAEGMSMPLYTEAMVNLMRK
>comp58692_c1_seq1
LSLSLSPPQIETVPFLTLSTLHINPPSPKFAETASFLLSLLFHLVYSIPESTKIY*
>comp52853_c0_seq1
MGIVFTRLFSSLFGSKEARILVLGLDNAGKTTILYRLQMGEVVSTIPTIGFNVETVQYNNIKFQVWDLGGQTSIRPYWRCYFPNTQAIIYVVDSSDTDRLVIAKEEFHAILEEEELKGAVVLIYANKQDLPGALDDAAVTEALELHKIKNRQWAIFKTSAVKGEGLFEGLDWLSNTLKSGGG*
>comp58856_c0_seq2
MKITDTSAMNFQNLILPKAILLYSLGEDQVKDINCNRMKRLRSKLPYWVLRVRDWVLLSREVFVGLREQPQQNRT*
>comp35704_c1_seq1
MTFEITFLKVQNKKIESDSCKSTSHKTAKNGTITVRKFC*
>comp31116_c0_seq1
MRAAATAVSLALCVALAAAAPADPVPVTVDKVDAIKDSMTKGFFEDLSQISQSIIAHAHKLAEQLITSIDEVAKKALDSLHKDRPLVGGVPVVDGQHSVEAAPVIPEIPESAAVPAQPAEPIAVDVFKRKQDKEMLAPAAQVDVVTTT*
>comp264022_c0_seq1
FSLLFLLFSLLFLRPLFSTFPPLFIREEETKKKLNTECLCAECVQCSWWRLCVRSGGSVCVCAVSVGVRRVCVCRGRRAW*
>comp1081_c0_seq1
MKFRMTNRVCLCALHHIQKIFIDNRNILSLSRTRCFCNLYGRLYILLIVVFTEHKFPFSTGSPLNIIDEKHLRFYQLNL*
>comp16959_c0_seq1
MLATAADSNLGGRDIDTILAEYFCKEFETKYKINARTNPKAYLRLRTEVEKLKKQMSANSTKLPLNIECFMDDKDVHGEIKREIMEELCAHLFHRVEQTMRRCLEDSKLRQEEIHSVEIVGGTSRIPAIKQLIEQVFGKTASTTLNQDEAVARGCALQCAILSPAVRVRDFSVTDLQNYPIKLVWDTSLKE
>comp58295_c0_seq4
MVVKKPRVVIIGAGMAGLTAANKLYTATTSKDLFELCIVEGGTRIGGRINTSEFGGDRIEMGATWIHGIGGSPIHKIAQEIHSLDSEQPWECMDGNTDEPTTIAEGGLELKPSIVDPVTKLFKNLMDYSQGKLTEESAKGELYRYYKLAAKASMTSTTNGGSGNLSVGSFLRQGLDAYWVSVKEQEELKGYGNWSRKLLEEAIFAMHENTQRTYTSAGDLLTLDYRAESEYQMFPGEEITIAKGYLSIIESLASVLPPGLVQLGRKVTKIEWQPQRDELKNMENGYCSRPVKLLFSDGSVMSADHVIVTVSLGVLKAAIRGDSGMFYPPLPPFKAEAISRLGFGVVNKLFMQLSPTHGGKHEHSKGFPFLQMAFHSPQSEMRHKKIPPWMRRTATLFPIYNNSSVLLSWFAGEEALALESLKDEEIINGVSTTVSSFLSHSQWQKDSSSHKLCNGNVNSEERSHENEVKFSKVLKSKWGTDPLFLGSYSYVAVGSSGDDLDTMAEPLPKDSSCQPSASSPLQILFAGEATHRTHYSTTHGAYFSGLREANRLLQHYQCVGIYNN*
>comp53383_c0_seq7
MEAVVSSSSLLSLTSSKTRCRVSEICPKTKAKVRFPRRKNCNFSVKNEKRRRTRTRVAAINDVTTVLEPAPVEVTWQIVVGAIAGLTPFVVAGIEFSKRIMAQRRCEVCGGSGLVLREKDYFRCPGCGGFLPWQSWKRFFSG*
>comp179805_c0_seq1
MKISSSIPLRYKQRNNFFIHRIYEKGNKSLNIKVNIPQRSKSSKNE*
>comp88928_c0_seq1
MADQLTEEQIAEFKEAFSLFDKDGDGTITTKELGTVMRSLGQNPTEAELQDMINEVDADGNGTIDFPEFLTMMARKMKDTDSEEEIREAFRVFDKDGNGFISAAELRHVMTNLGEKLTDEEVDEMIREADIDGDGQVNYEEFVTMMTSK*
>comp34490_c1_seq2
MRMGRKCSYCGNLGHNSRTCNNSHRGGFTGGLKLFGVQLDLCSSSSSSSSSSSSSPTYFAMKRSFSMEYLLSS
>comp2011_c1_seq1
NSGVLVVFFWVLYCLLSLLNLLQRSVSIRICC*
>comp362411_c0_seq1
MLTWTTTSFGTSLGTFSITQKVSHVPIVMLYGLQTYRNWFRLYLEIIMVLGTKYDHHVYDFRVEGKLHLQMIKQTCQNAIHN*
>comp32812_c0_seq1
MKNHPARTSKTASFAFYPSAPSRPIISILPSSSQIKLPKGARSANSYPVAKTLGANLGMEY*
>comp20498_c0_seq1
MFMITYTLIPSFAIQCGC*
>comp172473_c0_seq1
AELLTHSKTIKQFFTFYPPYFTSFSSNRN*
>comp33829_c0_seq1
MKHKAVDQSVTQAVELPNSQLEGTMKSKSEGENANLYLLQIISIRNFQC*
>comp23297_c0_seq1
MEFCFVHFNHSSSREKAVFGLVY*QTCTTGHITWPSMVNTPFTAKFCR*
>comp280798_c0_seq1
PPYIDVKFIYKICYFFFYFLPPSSLFSLPNNSCSFIIRFPQTHHYHYPRHVILTWKVNKRKN*
>comp48495_c0_seq8
MATCCSMPKQVSEKQVMAVGIDESEYSTYALEWTLDHLFTPAPNPIFKLVLVYAKPSAASTVGLVGPGAAEVLPILDADLKRTAARVVEQAKELCIKKSVNDVIVEVVEGDPRNVLCDAVEKHHASILVVGSHGYGTIKRAVLGSVSDYCAHHAHCTVMIVKKPKTKH*
>comp239140_c0_seq1
MKILHKQGSPSTLLPFPYNLIDFTTSNLMFFVVWFKQCKLLYLC*
>comp48044_c0_seq1
MQTLHNINEDELAGFEEEWKGKGQKYLPGWTGSIGPSRSGQAEQARQGGWALPSSEHSYPVGTMSEVRDKVGSSLTQERARADDSDRSAYHPRGRSWN*
>comp284349_c0_seq1
MDSHEEKVYQAVRQTQEREAKNKMREKAKKLQRARMEAHKKGGGFSKGTNMSQMGGFGSSSSFTSPVIETPVEMPKPVYTPAKTSGPTKAMKLGGKSRDVEFFVDQLVSEGEKVTSPQNSSKPASTKIPVAPAVHTDEVHLKQEEKL
>comp57814_c0_seq7
MGWGSRVYEGLVVVGSLCLLAWAGLWFLNRRLYKEYEEKRVLVQIIFIVVFAFSCNLLQLVLFEIIPILSKQARVVNWKVDFYCLILLLVFMLPYYHCYLMLCNNGVTKERAALGAILFLLAFLYAFWRMGIHFPMPSPDKGFFTMPQLVSRIGVIGVTVMAVLSGFGAVNLPFSYLSLFIREIEEVEIKALERQLMQSIETCISKKKKIIICQMEMEHGQGSEEKLNARSLFKRIVGTVVRSVQEDQKVQDIKGMEAEVLALEELSKQLFLEIYELRQAKEAAAYSRTWRGHMQNLLGYACSVYCVYKMIKSLQSVVFKQAGSVDPVTMIISIFLQFFDIGINAALLSQYISLLFIGMLVVISVRGFLTNLMKFFFAVSRVGSGSSSNVVLFLSEIMGMYFVSSILLIRKSLATEYRIIITEVLGGDIQFDFYHRWFDAIFVASAFLSLLLLSAHYTSRQTDKHPID*NILPRCMYNT*
>comp24548_c0_seq1
MAFNLFCKFAYSNINHHCYYERSSVHRKDFEVI
>comp504037_c0_seq1
MRYSGQEYVSKSGKVIPAKKQPELICTCPQKCGDKIPQGARERLFKEFYRLSDHALQNRFLQAHIEIRAVQRRFWRQQQRTASGRSQRRVSC
>comp44182_c0_seq1
MASSWTPRQNKLFEQALALYDRETPDRWQNVAKMVGRSVEEVKKHYEILKEDIERIEHGQVPFPQYKTNSNNT*
>comp348609_c0_seq1
MLSCFHYYKRTNLSEICRQHIEYERRWERNMQKWCANSITCEFFLFWTPRSVV
>comp131980_c0_seq1
ILFYFIFVVLFAASTQASTFCLYLHSTHAIPGFCIKITSVTVQIANVCNV*
>comp8199_c0_seq1
MDQEQQPNLIPLGGREDESWIYNLIHNLI*
>comp122742_c0_seq1
MCLSRSIDSQAIKTSQHVNNLISAYISISLIRISSFLEAEPWCNSKVAPL*
>comp40534_c0_seq1
MNIQKIVKELNDLDDSVCSGSSQEVERKNKLSSQFWQQIHAKESLIRRKARYRWIMEGDANTKYFHACVKGRRRRNQLLALKKRRFMG*
>comp23246_c0_seq1
MKKADRHSILLHCKMEDIQIPMTRGNMEDIGQETNGDSQMDSTVVNDRESRIVIDYSGLAEDLKDIDEDDVKKVGDKLAKHIADQSLTLQRIQAPNMKALEKLELARGKLQVTNEEFENARKRAKKAKQNFERIKKE
>comp283784_c0_seq1
MILYDRPHHSSVISPEAGYNLGKLEAQIKEEPKANAQLLSDVQKVLESQKENNRVLAEEKAVQDEEERKEDERRLQAASGPEVIAVLVFSCSRTTVTRCLDQLIKYRPNPERFPIIVSQDCQHQATSDAIDAYAE
>comp536763_c0_seq1
LSLSLSILCSSSFNPPSYCLICFVLYSALLIYPSIPWKLWRARENSIFFYDHSFSGLQSLGYYL*
>comp201067_c0_seq1
MSKVKFISLSSQLLLMLHPCLLLLCAFYKFDIQRTKWKQLIVRFLNQTTHLGCRELTW
>comp105916_c0_seq1
MNKFYIQLSNLLDKRLTYSFLLILNIVIFRKLKITFFYY*
>comp58480_c0_seq1
MESIPIFLPRPSFCIGCVQNSPSKQPIHQILIST*
>comp194212_c0_seq1
MHSNSIKIAFNSTTTSIHYVKNKCVSATHNCILSSSIFILM*
>comp47518_c1_seq1
MHGSYFTVGTDRAATMKCLSVISLCFLLCLCVQRVSSQNAIFPPKGWNSYDS
>comp46588_c1_seq1
MEEEEDRILLNSLGVKSANPQDIERDVLEKARNDAVTITEAEGSTKEENSLISENVDPSSTSKVELHHKLRAIKFEIDAVASTIQRLRNVENNGECSDVGDDSQEQGIAEDDSSNDSNLQHVLAADRLRSLKITKAQLEKELSDLCKENTSKSIEREELIFNLVKEERRPKRKLKEVQKSHKSSGKQHKTVSFNDDVDFDAVLDAASAGFVETERDELVRKGVLTPFHKLKGFERRFQQPETSRSHNAAEEENTGDFASSSVERAARSISEAARARPTTKLLESEAVPKLDAPTFPFHRLRKPLKLPKPLEREVEQNKDSKRKKRRPLPGRKWTKRVSCEEIRMEESENANGSLDTSSCENLEAQDVELADHEPSYVTLEGGLKIPGNTFEALFDYQKVGVQWLWELHCQRAGGIIGDEMGLGK
>comp44176_c0_seq1
MAAKVTLSSPLGFKTSFLPKSPSLSTALHTLSSPKTNVRGVKVHAKLGGGDEEIKKGGKKKFITRDEEPQQYWQTAGEREGENPMKTPLPYIIIFGMSTPFVILAIAFANGWIKVPVR*
>comp35402_c1_seq1
MSFKSRTTRGLYSLLRKLSKRNFGGQVKQAA*
>comp313670_c0_seq1
MMFKYSISYQFSMLSIIAFSVFLDCLSNEIIIWTILVDLVFFLLLKA*
>comp6978_c0_seq1
MVFLRVDQISFWLVAFKTFSKWFLSPCHHSSYFFSQGKEATLDPNI*
>comp55089_c0_seq3
MSGRKSRGNKDDGGSNNESKGMMSKIVTVACAAVAAVALVGQGNDDDGIESESMVLVSKAVIAASGVMAADFLVDRLFALMSASGSGSQFETTGDDDVVDDDDTWISPPDDWIKCNVDGSAPPDKASGCGGVFRDSTGSWKYGFARSFDRCTSSAAELEGIYTGLDVALKQGFRKLILVTDSLTAADVVNNSNGASARRHHEKILVQKIRNLLENRNWDVKPKIVHSKEDGNKVADWLANLSHGLEVGDQMELPKLPDGCHSCQKLMLEDMAKLAKTKAG*
>comp34540_c0_seq1
MLAIRTSYVHSSQPHKIHFDFMHTAESPKQMQFSCGLGIQDPVQCSPERNR*
>comp50240_c0_seq4
MSLLLQLSSHHALCSLSPSHDFRYITKPNKALHPSKRLSFVRTKVRAVGTVPEKESETTEPDEPPYVGFAFVSSVLLPDGTPDVQYRSACGGQKLRDIMLDSNIDLYGPYARVLLNCAGGGTCATCMVEVLEGTELLTPRTDKEKEKLTRKPKNWRLACQTTVGKPDSTGVVVIQQLPEWKGHEWKYEKPEEIGSS*
>comp53991_c2_seq2
MSIDAKFASLLENLKVQDPWVPPKTWESIPSESGIFSSFPSSSNQPLYDLSTVSESSLVRLVMNAMQGVKSSLISIQKLSAIFCSDPADRTFHRISSLWNRASSTHSLGNILKSIGCTGSLVFLLREFVDYFTNMNVEHSLIGKSLDNSEVGKSKNHQEDRLREEECPPYSLVNQAFAVAVGKVLEGYICGLDTIYASVVLRRSSKDVDLPASGCLKSVVHSEITLLEFYLHTKELRTQIEALGSICNLQKWAFCFSDTSFEDLITEATSEFCNFCRGGDLLTFLYAQLQVADPAHCTLLKFLFLQSCEPYCGLIRSWIFKAEIHDPYKEFIVENIECLPPKSHVKAGNSVDFPLAGIKERDGVSVPGFLKDFLVPLVRAGQQLKVLLKLLELCIHVSARDHSSDDFLPCWSGFSSSSPSYSSPLTFSRYIIEAMVLARESYYKRMNEKIESLLSSLEVRYQQVATHASVPSFDNGGRTLDKLGQLMSEDKSIVRPTADKRSSNMGIDSLGSDVSSTEDEFSLLEDMYGSSESSSLNSSEEQLESDQLSGWPCPIVGQQNPLSALSFSKSTTLNSSIQNSCHHEKSGSDLHGICDKMDAIDHLVKSSHEGMISSHISNPLNPGKSSCSGTFSIQYRENLTDCYWAMGHLLKNSFDDDGIDGQKVTEKHLGSPKYSMLCHDVIAISDTLSGEVTSEDQSDNNTFASNLYTFQPQKNSHQCNLPSMNPLSMNPMLTKNALLHLMSRNGEKCKADHGQPLPYFNFSTVEDPCKVYMDTLPTSSRSRSASTYGSKNNQYGEKGHGGEDGLVDVPKYCFDASLELMNHNQDVSTIVSGGSSWERLLGSFRKTVNCHATPKQSLLSTFEIPLDIIIDKCLLQEIMLQYKYVSKLTMNVLEEAFELQEHLLALRRYHFMELADWADLFILSLWQHKWSVTEANERLSGIQGLLELSIQKSSCEHDPNKDRLFVYMKGHGKLPLSTSAIGVRSFDFLGLGYRVDWPLSIVLTPAALKIYADIFSFLIQVKLAIFSLTDVWCSLKDLVHTTNKDLNSERHQREAGHLNILMKTRHQVSHFVSTLQQYVESQLSHVSWCRFLHSLQHKVKDMMDLESVHMEYLADSLCICFLSDETRAVGSIIESILQCALDFRSCLIAGAWDIGSDQENLLGRLSRINISQVLSIKQKFDKSLKALHLCYIKAPKHGNLGLSRFWEYLNYNDYYSHVSNEMGSYAL*
>comp19958_c0_seq1
MVFESYGLDNQKCESLLESTDYVLRCYKYRTPQVGETNAGVHPHTDSGFLTILNQKLNGLEIKLKDGEWFQVDASPSLFAVLAGDAFMVWSNDRIRGCVHRVFMNS
>comp248297_c0_seq1
MVLNFGLSFVYHSEPETAPSTDSIFFLFGNIIQILGSHIVIFTLYHLSL*QNYQG*AVKVIVDTSRLILIEDKCN*PTHLYLFLFRATKVFKR
>comp42080_c0_seq1
MNFYSRGMISSWNLINRVRIPATEKHFQRA*
>comp181627_c0_seq1
MYYVSRDCFDVLNAQMESSSCGEHFSHHAGVTIFGKILWFYSICVFFVCLNLSYAHSSRGKNLKEVKA
>comp223032_c0_seq1
MQQHKGPLTHDEAVFAKNISFEDSSSYLMKRNRISKVFLFRANFCRPPSRDARRSLLYVPVINRKSLFITISTACCLVIAYRIIVRQQKTSRWRQHTFPMYEALAILGFSRNAYSL*
>comp22293_c0_seq1
MAMEDVTACCILQQFSSTEELQNADRILKSLGLEEAEKYMKVKPAVIPSSEFIKHYFNSFSNDPISKYLTSSDNGSQD
>comp104528_c0_seq1
GKRLLLLWSSSLLLCSNFFYAFSFAGFSFSWGGCLLSKRILFHLKYRD*
>comp60147_c0_seq1
MAPRNSRGKAKGDKKKKEEKVLPVVIDITVNLLDETRVILKGISTDRIIDVRRLLSVNTETCYITNFSLSHEVRGPRLKDTVDVSALKPFVLTLVEEDYDEDRAVGHVRRVLDIVACTTNFGASPPSKEKQPPKDTAEVVDGDGEISPRLGSFYEFFSLSHLTPPLQYIKKTVRRQVDEISEADYLFSLDVKLCNGKVVHVEASRKGFYSVGKQRILSHNLVDLLRRLSRPFDIAYDDLLKAFSERNKFGNLPYGFRANTWLVPPVAAQSSSVFPPLPVEDENWGGNGGGLGRDRKCDLIPWADEFSLIASMPCKTAEERQVRDRKAFLLHSLFVDVAIFRAIRAVQHVMGEPDLSCSVAENDILYTERVGDLSIRVLKDASVASCKVDTKIDGVEATGVNQKDLVGRNLLKGITADENTAAHDITTLGVINVRYCGYVVVVKVEGGENENVKSPSNQNFELLDQPEGGANALNINSLRLLLNTTQSENNRPVTQIKILESEELGASHAFVEKLIKESLAKLEEEEPGLNNFVRWELGACWIQHLQDQNNTEKDKKPSLDKAKNEMKVEGLGKPLKALKNNKHISDLSNPKLASENTKSHPAYVNGEPESAPLPSVESQHETTAAENELVLKGILSEAAFTRLKESGTGLHCKSMQDLIDLSQKYYMDVALPKLVADFGSLELSPVDGRTLTDFMHTRGLRMRSLGHVVKLSEKLSHVQSLCIHEMIVRAFKHILQAVIAAVVDREKVATSIAGALNLLLGVPENRELDKSCKIHPLVWKWLEVFLKKRFDWDLRSSNYKDVRKFAILRGLCHKVGIELVPRDFDMDSPIPFHKADIVSLVPVHKQAACSSADGRQLLESSKTALDKGKLEDAVTYGTKALAKLVAVCGPYHRMTAGAYSLVAVVLYHTGDFNQATIYQQKALDINERELGLDHPDTMKSYGDLAVFYYRLQHTELALKYVKRALYLLHLTCGQSHPNTAATYINVAMMEEGLGNVHVALRYLHKALKCNQRLLGPDHIQTAASYHAIAIALSLMEAYPLSVQHEQTTLQILRAKLGPDDLRTQDAAAWLEYFESKAFEQQEAVRNGTRKPDASIASKGHLSVSDLLDYINPNHDAKGRDVAVKRRSQITKVRTKSCQNIGSESSDESSKETPRETSDEEILIPEPGRSADAEQETNSADDSEQPILEKTSDEKPQIPGEILSEAHADGEDGWQPVQRPRSSGSYGQRLKQRRAAISKVYSYQKKNVESDSDYPFVRSTNQNSRYYFLKKRTISHGGYTDNQTVNISHGNKFGRKVVKAATYRVKSMSSATKTTAKDTSEIGDKVFSSHSEPGSNSSPNDVNPAKTSIVSLGKSPSYKEVALAPPGTISKFQVYNPQSEIPVSHDLGFGKHEEEDIEAHANANPTQEEVKNIFKEKDKDSLSDSVDDSQDDTKVSEKKEETQLTDAVQDNFESAEGLESGDVEAREAVDNIIMIDAVEDPADSHKQEHDTNNSSGSVEFPNNTNAISQEGEDLRVNISPLSQGDARGIPYKKLSASAAPFNPSPAIARAAPVAMNITLPSGPGAVPAIGPWPVNMNVHHGPATVLPAVTPMCSSPHHAYPSPPPTPNMIQPLPFMYPPYTQPQSIPTSNFPVTSSAFHANHFTWHCNVNPTVSKFGPNAVWPGCHPVEYPLSAPVFEPMPDPILEPQVQCHGSKSPSSASVLPEGINNVGESKKEVKVLESETSEDEVGIVPSESVKENGNPNFHGSENAGNKPNHNIDSNDNTSSSEKNMDGEKTFSILIRGRRNRKQTLRMPISLLTRPNGSQSFKVIYNRVVRGSDAPKSINFSSSKDCTATA*
>comp45514_c0_seq1
MGIYSDREQVWIVGRVLSAGLLQFRPKAICCAVYLWEFVS*
>comp614732_c0_seq1
QISVNVNRNFDLKFRIGLTRVPCQDLGALSKVSV*
>comp237716_c0_seq1
MSCFFFLCIISCNFVLKVALVNLFSVC*
>comp213821_c0_seq1
MAVGERPVGGIIHQPFFNNDGEKGRTIWGMKGVGLGGFTIAPPDPQKFVVATSRSHSNTKVENALKILKADDVIRVGGAGYKVLLLLEGRAHAYVFPTPGMKRWDTCAPEAVLNAVGGVLTDAHGMLYSYHKDIEDVVNKE
>comp319997_c0_seq1
MVSPGKAHLEKHYEDLKDKPFFPGLVTYMLSGPIFAMVWEGRDACKTGRSILGATNPLASSPGTIRGDYAIDVGRNVCHGSDGVESAKKEIALWFKPEE
>comp58912_c0_seq2
MSVTEFFTLGGKTTASRVIGVEGTTYDPKDGGIVDWTCYNMDANLQAMAEICAVCNDAGIYFDGRLFRATGLPTEAALKVLVEKMGVPDMKARNKIRDTQLSSNYSIVCNTVKLGCCEWWTKRSKRVATLEFDRIRKSMSVIVRETNGQNRLLVKGAVESLLERSSHVQLADGSLVPIDEQCRELLLLRLLEMSSKGLRCLGLAYKDDLGEFSDYYAESHPAHKKLLDPACYSSIEIDLVFVGVVGLRDPPREEVHEAIDDCKEAGIRVMVITGDNKSTAEAICREIKLFSKDEDLTGQSLTGKEFISRSHSEQVKILLRPGGKVFSRAEPRHKQEIVRLLKEMGEIVAMTGDGVNDAPALKLADIGIAMGITGTEVAKEASDMVLADDNFSSIVSAVAEGRSIYNNMKAFIRYMISSNVGEVISIFLTAALGIPECMIPVQLLWVNLVTDGPPATALGFNPADVDIMRRPPRRSDDALISSWVLFRYLVIGSYVGIATVGIFVLWYTQASFLGINLVSDGHTIIELSQLRNWGECHSWSNFTVAPFAVGGGRLITFSNPCDYFSVGKVKAMTLSLSVLVAIEMFNSLNALSEENSLCKIPPWRNPWLLVAMSISLGLHCLILYTPFLADMFGVVPLSLNEWSMVILISAPVILIDEILKLVVRSQRRMTKEKAA*
>comp36572_c0_seq1
YILGSVILPAFIPAPQQRNFCFLSTLIHNCPFRVDVLKNELKT*
>comp189802_c0_seq1
MRNIDFHPHRSLLGKAKAKYLQSISIDCPIWGGNFILLPSVKYFHQRKQGNKQDVSD*
>comp55981_c2_seq1
MAPEGKPSRNSDDAATGKKRKRYLPHNKPVKKKGSYPLRPGVQGFFITCDGGREHQASREALNIVESFYEELDHGEHSSVKELSNRPLNTKIKFVDSDSSSSGESGDDDDEE
>comp322047_c0_seq1
MDSTIVSEGCQLARRWKIISRNTATHCPSPSAFAVTCQHVTARFPFLPHLSHKLPLFGSASVYLALFLCGILCSHLCLARSYLFGSFSCMGYCILAVVCFYSCMEYCILAIV
>comp41352_c1_seq1
MAVTRDSSDFLNNRSFLLFALVVNQKTSPLLAMYQISFPILFSISPSISSATI*
>comp192392_c0_seq1
MLISSVQGGLHEVENRLKGSPELVNVPSHLQSLTTSIASLGSGLEDMKTTTGNLHEAQAALQKVIDNLNTNITGINVS
>comp203064_c0_seq1
MYNRTVSTVYLKMHLLFFCPSICEV*
>comp192770_c0_seq1
MANGEFFFIFFMVMDFIVLKSIETNYCYVKYLNYLACDCFWQFLM*
>comp20736_c0_seq1
MLDWPVPRDVKGLRGFLGLTGYYRRYVRNYGKIAWPLTQQLKESFKWGKEAQEASEQLKTSMTSSQCWRYLILRSNLLWRPMP*
>comp148669_c0_seq1
MEIMLASGQYIKCFKPISENFLPKKIMEESQFNLVY*
>comp54298_c1_seq1
MRLGCDFFECCFTSSCSDTFQKDDIQLKWPVFPYRELAKATNNFDQCNCLGKKGFTTLYYGKLKNGREIAIQRFSNDKRHIFQQFIHENVILNFLPHKNLVSIYGCTSHHKESLLVHEYLSNGTLAAHLQGEIAESNKSPWLTRLDIAIDTANALDYLHYYGIIHRNVKSSNILLDKNFCAKVANLHLSRKLPKGVSVESTHVTSDIIGSSGYIDPEYVLHGRLSVKNDVYSFGVVLCELISSKLAKYWEGIDEHSLATLLSRKIEKQALDELLDPRLGFQSDHKIKQMITAVAELALQCLQCPQELRPYMEQVLETLNGIRQGRYETNPIKAFKIFYHAELEEATNRYDTCLGKGGFGTVYYGKLQDGREVAIKRFHEEKDKTIKQFMKEIEILSLLRHQNLVALYGCSSRHSNKHLLVYEYVSNGTLSMHLHGSSGEKLTWLTRLNISIETAIALVYLHDSGVIHRDVKGSNILLDENFTVKVGDFGLSRSLPDYVTHVSTIPVGTRAYIDPDYYESGRVSDRSDVYSFG
>comp18018_c0_seq1
MNTLEGQKYAVKPSFVFPLIRAFILLF*FFPYPISFDCDQ*HVPPLPLKNERQLNSSICSGHDG*LSISKVEGM*
>comp42213_c0_seq1
MSTSVAHTSVEEKSVWEDKDEALSEEILRMAPDEIMSRLRLLDNEIKIMKSEVMRVNHELQAQNEKIKENTEKIKVNKTLPYLVSNVIELLDVDPEETEEDGAVVDLDARRKGKCAVIKTSTRQTYFLPVIGLVDAEKLKPGDLVGVNKDSYLILETLPAEYDARVKAMEVDERPTEQYSDIGGLDKQIQELIEAVVLPMTHKEKFENLGIQPPKGVLLYGPPGTGKTLLARACAAQTKSTFLKLAGPQLVQMFIGDGAKLVRDAFALAKEKAPAIIFIDELDAIGTKRFDSEKAGDREVQRTMLELLNQLDGFSSTADIKVIAATNRVDILDPALLRSGRLDRKIEFPHPNEDARARIMQIHSRKMNISVDVNFEELARSTDDFNGAQCKAVCVEAGMIALRRNAGIVSHEDFMDAILEVQAKKKTNLNYYA*
>comp39354_c0_seq1
MDNMVKKLIVREGAKAKFFLNILNLCQLASEKLLVFSQYILPLKLFERLSIKLKGWSRDKEMFMITGDSTHEQREWSMECFNTSPDAKVFFGSIKACGEGISLVGASRIIILDVHLNPSVTRQAIGRAFRPGQKRKVYTYRLVAADSPEEEDHKTCFRKELISKMWFEWNENCGNQQFEMKAVDVNECGDPFLESPSLRGDIKTLYKR*
>comp317481_c0_seq1
NNRLHIFWRELLSKSEESFEERRKAAKRRVFSSLLQCWWWRRTSFVVRCEGCAKEIPRLEDSGLHWGPERVARSHS*
>comp38333_c0_seq1
MEPNTGVTFDDVAGVDEAKQDFQEIVEFLKTPEKFSAVGATIPKGVLLVGPPGTGKTLLAKAIAGEAGVPFFSLSGSEFIEMFVGVGASRVRDLFNKAKANSPCLIFIDEIDAVGRQRGTGIGGGNDEREQTLNQLLTEMDGFAGNTGVIVIAATNRPEILDSALLRPGRFDRQVTVGLPDIRGREDILKVHSNNKKLGKDVSLSVIAMRTPGFSGADLANLMNEAAILAGRRGKEKITMQEIDDSIDRIVAGMEGTKMIDGKSRILVAYHEVGHAVCATLTPGHDPVQKVTLVPRGQA
>comp32154_c0_seq1
MYKVIIILRSVTHAICCQLSRNFLLKNDFKSSRFTSYIYCRHEGITSFPASILVHVLDLVVG*
>comp16951_c0_seq1
MVQILEWLNIN*IGNHYQSL**YNHIICVIAF*EVLILSRLV*ASKLLL*YVFCLMET*
>comp1568_c0_seq1
MRHSHREKLFTILSGNLQPNERSSHTYADMHVTIFFF
>comp45299_c0_seq1
MTIWYLLFFSMLHFFSGDWEGSIHTPFNFVIIIFSGLISWHEVFGFECLQ*
>comp284077_c0_seq1
MTYVMYDFDLGYVQGMSDLLSPILSVMSNEVDAFWCFVGFMKRVFRNFDMDQSGMKKQLSQLHTLLSAVHPDLSHFLDEHDSGNMFFCFRWLLVWFKREFTHQ
>comp114820_c0_seq1
MYLLKFFGLFVFLTVAEGQNAVINLKPSVTKTKFKLPKLPSKDAQVRATYTIVAPEDKRVLLRCENEGEIVECTEGTLQVINGLPKGFACKRNLNTLQTRVTLSIVNFNQVSDKTTCEAFSISGMSAAAASGEEEEEETSTKSKGSRRTSCDCGWTNQKRIVGGTVAKQNEFIWMTGLVHKSTGSRFCGAAIISDDIILTAAHCLDNMQPRDIEVVVGDHDMKGRVRTKAEQKIAVRTLAQHERWDTKKLVNDIALVKLADKIKFSQDVGPVCLPSGRSSLVGSSITAMGWGLTQTLFERDRGLLRKVDLKVVDIPTCSASYGNTINTRQVTQLCTYGKNKDTCQGDSGGPLVWMDPETNRYTQVALVSYGKKCGSASPAVNTDVAAYMDWIRTNMRRLSPGKAVCTKV*
>comp32059_c0_seq1
QLLSTKTLKRPKTHFKEQEVQRNEVKTTRQILKRPSCPNTVV*
>comp31368_c0_seq1
MKPSENISSKDTVNAKKKNCIKIPSVTLCFFCSTQHKLKYFLIIIYIYI*
>comp18656_c0_seq1
MASPAKRFLYLPQASSWWLSNCQS*
>comp174647_c0_seq1
MNNFDYFILFNNYPFKFYKILSNFF*
>comp919_c1_seq1
MSRERQCDFKLSRQETPFFYSKLRWTQMAISVFVQHKLENDHCP*
>comp208313_c0_seq1
MLSSNKVSNTGGYSLIWEFLIPDVCTFCVISLSKVRQGILVVEIATLKLSAMAYTFFSP*
>comp58412_c0_seq4
MAKTSSADGRTRSSVQIFIVVGLCCFFYILGAWQRSGFGKGDSIALEITKNNAECNIVPNLSFDTHHGGEVSKIDEADSKPKVFEPCDARYTDYTPCQDQRRAMTFPREDMNYRERHCPPEEEKLHCMIPAPKGYVTPFPWPKSRDYVPYANAPYKSLTVEKAIQNWIQYEGNVFRFPGGGTQFPQGADKYIDQIASVIPIANGTVRTALDTGCGVASWGAYLWSRNVIAMSFAPRDSHEAQVQFALERGVPAVIGVLGTIKLPYPSRAFDMAHCSRCLIPWGANDGKYMMEVDRVLRPGGYWVLSGPPINWKVNYKPWQRPKEELQEEQRKIEEIAKQLCWEKRSEKAEIAIWQKTVDSKSCRSRQDDSSVNFCESTYADDVWYKKMEACITPTPKVSGGDLKPFPGRLYAIPPRVASGSVPGVSSETFQDDNKKWKKHVNAYKKINRLLDSGRYRNIMDMNAGLGSFAAAIQSPKLWVMNVVPTIAEKNTLGVIYERGLTGIYHDWCEAFSTYPRTYDLIHAHGLFSLYEDKCNTEDILLEMDRILRPEGAVIFRDQVDVLIKVKKLVGGMRWDTKMVDHEDGPLVPEKILIAVKQYWVAGGNATSTQ*
>comp59692_c0_seq46
MVLQKRLDYGFNGYQVPTTPRATRSARRRATFQRVADNQMCAFDLLATVAGKLLQEKENPTTSSDASSEQDQHVFVKEECQDANKPFKAELSDEGSCDRKHQHGFVKECLDANKPFKAELSNEGSSDRICFSNLSSQVYNQNCCLKEFLLPEIDVHSRIASIVTSSSCSERSVAEILVDGKSHNEMGNFTSKVELGSPGCPEGNGCKLDVDISKLKDELHKFEKVPIGTGTEMCSFEDPLDEKPPALISSGVNAKLSGYDDRIPCSSLSKGSDNSPVVSRDDDENFSGCTHPSAKTKSFRPMTRIGDRRIRKILASKYWKVAQESKDDTLSNCDRNLKTIYRDKKNCYKRQRSQMNIPFKKRKLFNCSSVSNSNGFIRSGGIYYSPKNGMNQDASGPSPGMRKDPGMSSLEARQHSALRSRGSHVKQLRIKSFRVPELFIEIPETATIGSLKRTVMEAVTAVLGGGLRVGVILQGKKVRDDSKTLLQTGISDDNQLDALGFTLEPNSSQSLPPVCAAHSPHVPSGDIPQPLISCPSSPVVIHQRIQGSPDMLSEHQVTSLGNLVESDHDSAPSPINTSVDKGMTDSKALVTVPEMGLEALAMVPVLQKSKQSEIVQRRIRRPFSVDEVEALVHAVEKLGTGRWRDVKLRAFDDAKHRTYVDLKDKWKTLVHTARISPQQRRGEPVPQELLDRVLTAHAYWSQQQTKQQLKQQPETSLLL*
>comp51405_c2_seq1
GYTVGVFFRDHYEIYPKFGYDFRSHRAADELEREEAAIFTCSTCLRPEFLRFIS*
>comp57643_c1_seq1
QPVSHFCLNSKGTIRSVTTWLLQFSSIDYTNSIDK*
>comp20395_c0_seq1
MYVIVLYHGNNNSILHQNFFNMNLHDGSFFVSNQRAMKYSYIEGQHPI*
>comp20270_c0_seq1
MIRIWMMIFLMMLIIYEGDNFCNEMATTVYWSIRIMGKFLPKGLRRLSDLNFSVFLCNYYSWAFWPVCIISYDLCLEHICFFSFTTSFLGT*
>comp185589_c0_seq1
MTIDLLAYVGSNSIAKKQCWGLKKVL*
>comp50195_c2_seq1
MAVSQICVALSATPRLNCLLNKVEVPSCFVGLVLENCQLPFENHGHVILADPSLILFYPISSTEVRCLVDIPGQKVPPIGNGEMANYLKNMVAPQIPPELHDAFISAINRGNIRTMPNSSMPADPYATPGALLMGDAFNMRHPLTGGGMTVALSDIVVLRDLLKPLCDLNDAASLCRYLETFYTLRKPMASTINTLAGALYKVFSASPDQARTELRQACFDYLSLGTTFSNGPMALLSGLNPRPQSLVLHFFAVA
>comp51721_c0_seq1
METDREGSSPSYYSILGVSSDSSTEEIRRAYRKLAMQWHPDRWTRTPSLLGEAKLKFQRIQEAYSVLSDHKKRMMYDAGLYDPQEEEDEGFSDFVEEMVSLMAQVRREEKDYGLEELQSMFIEMAEGFESPSWYCGVPSVLDESRCSKRTRLDTNVRENKGSHFQVPNLNLYGTRGYCN*
>comp31476_c0_seq2
MFHVFVSPFWLNIIFLLLFNQTYAHLFYIMGSRGDFLLLKFGSLRHEVLSLL*
>comp63857_c0_seq1
MMGSHKQLLPLLSLFLILLLSGQRGTQAEARLQRDQLNYRPTKLFVFGDSYADTGNIRKSLSNSWKDPYGITFPGKPAGRFSDGRVFTDYIAKYLGVKSPVPYRLRKLMPQHLKYGMNFAFGGTGVFDTSTPAPNMTTQIDLLQQIIKAKVYTASDLSNSVALVSVAGNDYSHYLATNGSAQGFPSFIASVVNQTTTDLIRIKGLGVKKIVVGGLQPLGCLPETTAASSFQHCNSTSNDLVLLHNNLLSQAVTRLNQQTKDHSAFVILNLYDSFMSVLNHPSTHNIQNQFMPCCAGVSSEYSCGSVDENKVKKYKVCDDPKSAFFWDLVHPTQAGWHAVYNKLRIMNALQQLQY*
>comp28679_c0_seq1
MLCNPTNEPHNCHPFPNRQSNGVILPLHPKLINQNYYLIILFYFCLNKITVQGPSRW
>comp40072_c1_seq1
MLDFTPKQYFPKLMKVQICVCMHIPTYKVPHACFKTLSIMSTLKMKTRSIRKDC*
>comp3900_c0_seq1
MFVKSRRRRDDDFSVISRDNMDEVVQVHVPSLNRSRASESSKKGGDSKRGSSRNGMGDLIMVNDEKGVFGLPDLMKAAAEVLGNGGLGSAYKAAMANGLSVVVKRMREMNKVSRDIFDAEMRRLGRLRNRNIMTPLSYHYRREE
>comp274717_c0_seq1
MKDHEMYSSSIFLYICRALVLRPSIKLCLFSMNAPSKTLDLDAP*RKQ*IWQIKDDTLL*LACRRAKLSALSRIKYEIDVAYLSIDKFI
>comp2211_c0_seq1
MKFISGNIMQYNPNYAYTNYTHLLKLTILYLTPLSHSLTPPTFYFPNRTQRNLG*
>comp103082_c0_seq1
MEPYYTGLLEIFDTKDFQLWS*
>comp14911_c0_seq1
MDSINLTSHEFIRVLCYYENIT*
>comp212786_c0_seq1
MDSLISCKSRDCTQQLLKIVNSNKVDTVRASYYMTRLAVTEKDDIKDESEIKQLAESFIQSVDSVQSESIERQKLFATTALIGKWIQAKPSDSSIKQTAEQVAKTIVDRYVKPVTEQEVQQYQQQQQQQQ
>comp491621_c0_seq1
FLAKPAALTSALSPKGAVWLCLSLGIHCLAAIHTSLHWVYCQRCPKHLHPPKTKSVVTSLAVIHTNPHWTYCQQRPKHLHGYTD*
>comp51389_c0_seq1
MSDEEHHFESKADAGASKTYPQQAGTIRKNGYIVIKARPCKVVEVSTSKTGKHGHAKCHFVGIDIFTGKKLEDIVPSSHNCDVPHVNRTDYQLIDISEDGFVSLLTENGNTKDDLKLPTDDSLLSQIKDGFAEGKDLVVSVMSAMGEEQICALKDIGPKN*
>comp328877_c0_seq1
MPERLFYQEKFSLQIYCTNIN*H*EKSITLSLEFGKNCTSRKKF*KFEKNLQNWVNLLSSIISGNGSKKEPSATSNL*QCFSAERSQLRS**SYIKVKRTLGYGVIQYGFVDTEFLEFLLYD*VRDHK*IYIQTILAVVCY*WLDIHKQVLKTVLEADD*QIMILGSKL*
>comp202610_c0_seq1
LLKFRRVLGLHINLPPTRSSPLVLLHGQCRLVRPHRRCSNYFIITNQD*
>comp19460_c0_seq1
MSLMVSPCCFPPFFCLHFVSLYNKNINDVIYDFGYMYALYGLLSFSHEPIPALTMNLVQNQKVTEAVGKLRVPLLNKSLC*
>comp234036_c0_seq1
MISFTSKAFVMALIYSSKILVIRHWKLPKV
>comp53568_c0_seq4
MGEGERFQLGTVGALTLSVVSSVSIVICNKALMSTLHFIFATTLTSWHLLVTFCSLHVALRMRFFEHKPFEQKAVMGFGILNGISIGLLNLSLGFNSVGFYQMTKLAIIPCTVLLETLFLGKRFSRRIQFSLSILLLGVGIATVTDLQLNALGSFLSLLAVITTCIAQIMTNTIQKKFKVSSTQLLYQSCPYQAATLLISGPYLDKLLTNLNVFAFKYTTQVTVFIVLSCLISISVNFSTFLVIGKTSPVTYQVLGHLKTCLVLAFGYILLHDPFSWRNILGILIAMIGMILYSYYCTLENQQKAVEAAAQASQAREAESDPLINVEKGSAVLTDTVGQKSPAWNKDND*
>comp41036_c0_seq1
LSLQTSQGIDQKLLPHFDTHFLNFSYTFVYK*
>comp43226_c0_seq2
HHCYQNRRLEIEKVIVFLSFGVFLPQDRTQLY*
>comp4127_c0_seq1
LLQCQSCLPIIRINHNISQKKTENTSNKNSFHFSNFRKYKF*
>comp59951_c0_seq5
MAEEKAPSGVGVSWRASSSFVKKGDRQMFTAELRPGETTIVSWKKLMKDANKANHGSTSAPEHPAIAHPALESRIAPGQPTEIEEKDASQPNRFSAVIEKIERLYMGKDSSDEEDLRDVPDDDQYDTEDSFIDDAELDEYFEVDNSAIKHDGFFVNRGKLERINQPPVLPNQQPKKRRRKDILKNPGENYDGHGSNKHVKVGKPAAGKTASLQANNTFNSSQTAPGEHYEDLKLRNQLDVSGVSSKKKTADTKPTLGPSVSLKVSNDDVPASVTEAKDVDKQKIGVLQSKNTSDKSKDASGLFDTSHQKHHEKSAYAPSKSQPGRPSSNIDDLENTGRSKEKNGMRELPDLNLSEGKSAMQATKSEYMHKKDGSNVRPKTSMLEKAIRELEKMVAESRPPAVENQEADTASQAVKRRLPSEIKLKLAKVARLAASQGKVSKELINRLMSILGHLIQLRTLKRNLKIMISMGLSAKEEKNDRFQQIKKEVVEMIKMQAPTLESKQKAGASGDFQEFGPDEKAITKRKFSMDTALEDKICDLYDLFVDGLDENAGPQIRKLYAELAELWPNGYMDNHGIKRGIVRAKERRRALYSRLKGQEKIKRKKLLAPRQEENVRFDASSITSQQNLRERLTPESSSHAFTSVNKPVSNTITAVRVPNPSMNGLKQEKAKGNSSSSLDDVRVADGVLTKKKVKRKPELDLEGTHFGPEKLASLQGEERPRSLKQSAGLPPKSNLQPTSLPGLEQSS*
>comp58761_c0_seq18
MYNGIGLQTPRGSGTNGYIQSNKFFVRPKTSKVSENSKGFDADQGTAGVTRKPNREILEHDRKRQIQLKLLVLEDKLSDQGYSDAEITQKLDEARNNLEASSEDADGPMPSEKKVSETQTHQIAARKERQMETLKAALGIVSSEVNEILTDGNDDGPRNDGKNGSNAEGKHQSKTEHAFLDRDVSWKKQMVEDQKDEGADKTVVKESRHRKKGGTRKIKYEVHSSDSDSSTDDDKGDRKKHRKGNKESGDEYDSDSDTERKVKASKRHKTSKQHKKGRVGDRDESDDTDSTSDSEDSNAARRSNEKYKKSHKRHDSDDGSDSQEEKQHTKMRKPRVSKEESDVDSEEEKKYGSRLEKQKRRRRGSNDEDSDRNYGKRASGEDRYVKRGSSSSTNGSGSDSDSDSDSDSNSRDHRNERRKSGPVVTKKSGPREEANERGRKSGKGYGVEENKFRYDARGNDVEKGKNGANVDGLDSLRKSYGRAFTEGSNSRSQEMTRGKRKLDGDRDREPATVAKHDEDDRKFIETESESKSRLHLHKDDWERDDCSKSARLGGRDDGTSQQRGRNYNRDVDSHFGGQIDRAGEDHEARRHRRKDDNHREWEHRTDKDDHRQRKRGRDGDDHTGRKHRGDDDYHGVRKHVRDDGYHEERKHRKDEDGGGERKHLRDEDVHGERKHARDEDNHGERKHAWVEDNHRERKPKRDEDDFRYGRHEHDEKRHRGRRQDNKEEERGDKDYERDSHRDYSKRAK
>comp4491_c0_seq1
MLQILAINFQNIANRQLRGERKKGRKLGQFTKVLVELDSTALLDECGSIL*
>comp91423_c0_seq1
MIHIMLDLCIIKKKGFLFYTHKNKRFSLRHPSRQPTMTNFSPSAERKLATT*
>comp40996_c0_seq1
MLYMIWPMKYSIARIITAFEAIPYREYIVSVLMFDLHVSVIFFCWKTWTSHVSYP*
>comp54673_c0_seq2
MGSSAMVLDPKPSLEPPPSLPSTKSDYLQGLTDPTSDEDDLYSRLKSLQRQLEFIDIQEEYVKDEQKNLKRELLRAQEEVKRIQSVPLVIGQFMEMVDQNNGIVGSTTGSNYYVRILSTINRELLKPSASVALHRHSNALVDVLPPEADSSISLLSQSEKPDVTYNDIGGCDIQKQEIREAVELPLTHHELYKQIGIDPPRGVLLYGPPGTGKTMLAKAVAHHTTAAFIRVVGSEFVQKYLGEGPRMVRDVFRLAKENAPAIIFIDEVDAIATARFDAQTGADREVQRILMELLNQMDGFDQTVNVKVIMATNRADTLDPALLRPGRLDRKIEFPLPDRRQKRLVFQVCTAKMNLGDEVDLEDYVSRPDKISAAEIAAICQEAGMHAVRKNRYVILPKDFEKGYRTNVKKPDTDFEFYK*
>comp40614_c0_seq1
TYRINCQSESTCSIKRETKYRAGRSGILLKTK*
>comp581098_c0_seq1
MIEKSNIFRRCFSRSESATITVYPTKEAEKQQMDNTAGDLPVSERSVRAFWILGLCNNYGYVVMLSAAVDIISKTTS
>comp194156_c0_seq1
MDIRENLTFEIKPKQIIDTSIKKLKGKEIQLVKVLWEGLPEEATWELKEDMISRYPELFKPGIGCCT
>comp48155_c1_seq1
MCGILACLWCSDDSAAKRARIIHLAQRLKHRGPDWIGVFQHNGNYLAHQRLAIVDLTSGDQPLFNEDKTIAVVANGEIYNHEELRKQLPNHKFRTNSDCEVIPHLYEEHGENFVDMLDGIFSFVLLDTRDNNFLVARDAIGITSLYIGWGEDASVWVSSEYKTTLEDCEHFERFQPGTLYSSKEKGFRRWYNPIWFSEAIP
>comp32907_c0_seq1
MTTTFMQHFTLDWEIISQVHYEDNIASHLHLMGKKYPVDKAYML*
>comp20365_c0_seq1
MSKPKVFFDVAADKTKLGRIVMELRADVVPKTAENFRALCTGEKGFGYKGSTFHRVIPGFMCQGGDFTKGNGTGGKSIYGNKFEDENFQLKHTGPYLLSMANAGPNTNGSQFFLTTAKTTWLDGKHVVFGSVVQGQDVVTKIESYGSTSGSTKAKIVIEDCGEVPS*
>comp50759_c1_seq4
MESIIQKTELSSQNHPISLNATFGMGTETNSSDMVTDSMLTSYMETAEVEKYSSSIQVDNEEKRNKFEGFCGLDGVLNLSKGVSSTNFALSSIHVPSFSVPILKEKKRSSYPGSFAESSKKQHCSSRESKGEKSGLTEMRKQCCSLETAGKMKEVDSYLGFKSVFSFL*
>comp32797_c0_seq1
MHMWC*LRRNIFLHLHSVTVSTNGLK*TNSILTHFQVQKGTQ*RESKRNYKT*NVRMSI*
>comp494151_c0_seq1
MIFYTTVITSVLLASFVQGSDPVTSIPIKRAPYKVLLVQRFNKTQVIGTGAILNNQWVITTASTIINHKNKPHSLMIRSGSGIYNQGGGLHEVDKIIIHPDFQKASANQHL
>comp58490_c4_seq4
MTRILVQRGSSGSSSSSNPNPNPSRSGSSSARADPQPQVTVQPAPSVVKDEESGEEVLGLVVGDEILECSGTSDSNKAKSDDLLMGGVHFELNDTSSGDGEVAVVEKDVKEEVVVVGPRELMKGLSGLRISENEGSSGDSSLTASGGSSQSHPPPPPVPPPKPSAANFNSRRYVSGTSNSGNVGSSRRASAWPAVSARTSPAGSRPSSPRSHNESEGYNSADEQKPCFVSSYDDVERERQFEIDIRRAKGYEVKRMMEDGNCLFRAVADQVYGDSELYDLVRQMCIDYMERERDHFSQFITEGFTSYCKRKRRDKVYGNNVEIQAMCEMYNRPIHIYSYTTEPINIFHGSYNTDTPPIRLSYHHGNHYNSLVDPRRLAIGAGLGFSCLRGTNVDKDQVKAAIKAQQDQQINNALLAEGRFYSDLELTEKEIERMVMEVSRAEYLADGTFKQQLGHRESSTSNAEPSSSGARSSGTDRKMEHGKEHGSDLSNSIKIVLSMGFSYLQAIEAYSIFGDDVDSMVCYLLETGSSSRRKGKATE*
>comp58317_c2_seq2
MFKFLKEVVGGSGTSHRDLPYTIAEPYPSAWGSWTHCRGTSKDDGSLVSIFSLSGSTAQDGHLAAARNGVKRLRTVRHPNILSFLHSAEIETYDAGSPKVTIYIVTEPVMPLSEKIKELGLEGTQRDEYYAWGLHQIAKAVSFLNNDCKLVHGNVCLASVVVTQTLDWKLHAFDVLSEFDGSNETSSGQMLQYAWLVGSQYKPMELVKSDWAAIKKSPPWAIDSWGMGCLIYELFSGLRLGKTEELRNTASIPKSLLPDYQRLLSSMPSRRLNTSKLIENSEYFQNKLVDTIHFMEILSLKDSVEKDTFFRKLPNLAEQLPRQIVLKKLLPLLASALEFGSAAAPALTALLKMGSWLSAEEFSVKVLPTIVKLFASNDRSIRVGLLQHIDQYGESLSAQAVDEQVYPHVATGFSDTSAFLRELTLKSMLILASKLSQRTISGSLLKHLSKLQVDEEPAIRTNTTILLGNIASYLNEGTRKRVLINAFTVRALRDTFPPARGAGIMALCATSSYYDITEVATRILPNVVVLTIDPDSDVRSKAFQAVDQFLQIAKQYYEKTNTADATGGAGMGISSIPGNASLLGWAMSSLTLKGKPSDHAPVASVSSTALTPTSSNASSAIETPSTAPVRVSSTTDLAEHPVPTSPTSTDGWGELENGIHEEHESDKDGWDDMEPLEETKPTPALVNIQAAQRRPVSQPVSQTKQASSLLPKSTPKLSKDEDDDLWGSIAAPAPKTSKPLNLKSTTTDDDDPWAAIAAPAPTTKAKPLSAGRGRGAKPAAPKLGAQRINRTSSGM*
>comp57539_c2_seq1
MAAQLPDYFKCPISLEIMSDPVILSSGHTFDRSSIQRWLDAGHRTCPITKLPLSDDAPLIPNHALRSLISNYAHISPLTHHPPPQPQTLISTLTSPTSSMDSKIQSLDRLTRLSKRDSVFRRRLTESGVVSAVLTCVDSGDDALQEKALSLLLNLSLDDDNKVGLAAEGVIGRVVAVLMGGSPDCRAVAATLMTSLAVVEVNKATIGAYPYAIGSLVSLVRDGKGREKKEAATALYAICSFPDNRRRAVECGAVPILLRTADSGLERAVEVLGILAKCKEGREQMERFLGCVQILARVLRNGTSRGIQYALLALNSLCCNSEGTVLEATRAGVLEICLGLMEDDNEKVRRNSSSLIQVLRGNCNHRMI*
>comp231505_c0_seq1
MIPTTFTFLLLAACAFAADNSTKVNVTVYYESLCPDSAAFVNKQLVPTWEKMMDNIDLVLVPYGKSTTEKTDNGTKFTCHHGEEECVGNKIQSCILEGSAVPNTTAQVKIIDCLMREAKKDMPYPTKMCVAKITSLDVEKVSTALESCANSTKGDELLEKNGDKTKVFESPLVNVPAVTINGMKDKDAIADFQAALCKASANKPEACKGGKNSSPSLVASVVLPLVASVLLVKL*
>comp328367_c0_seq1
MLFALGFVFMFTIGGLSGVVLANASLDVAFHDTYYVVAHFHYVLSMGAVFALFSA*
>comp270034_c0_seq1
MKVLYKKKLMRRIAIGTFISVLLILFLLYVVIPIVFKYTPSLQKGLLYLSSVYIPVDFKNPNKLINGSRNLYIKTNDSVSLGVWQILPNSLVIPSFLTPQG
>comp38690_c0_seq1
MITCELNSIYFKGSSQDSSDLGHDVSSLCFICVSHVLRSAECRLQRHVFVFFFHSF*LFIVIYLLKYNKPSSSLLLLLTCYCF*CF*QEEEQINNENGTWVSYFKDFYNSL*LIQHRTSSIYRKHFKLQ*HDDQHHS*HLAVQTQHLYK*G*QSLCHLRCKIKWQCIIKFPKTTSWLL*EM*
>comp51479_c0_seq2
MYSISKMKSDRKPPLPRSPMRLRPRRVLHSSNSTSLQTPPGSLTKYQKPIHSRDVEESALRPEYRTISCELRALAKMVRGEFGNADPENVTAANSCTVNSGLLFERGRFYDEYSARRNERLKRKKGVTVDKGKPAYALGVTVESAKKSSSRKLGSLRKSVSAAYSMEPSETPRYMLRSMTKENKKPPLAANFDKSVLGGEKKMAARRVGRI*
>comp122150_c0_seq1
LRNVLPQGTQCCNFIAQFHASPYYGLNNGLVCIILINI*
>comp499942_c0_seq1
SLKYFLFWLYSKDILETTSKFSFAKI*
>comp349932_c0_seq1
MAPFSCYTKIYYLLSHTFGSLYAKAVVGVINNDHQIKSRNHQMILLLLRWLCLERWMLL*
>comp130114_c0_seq1
MT*YRQTSPVTRRLKRQLLDILQIMQRDVSGLDRICPSYITGVISSGLLIE*
>comp15185_c0_seq1
MQNMPIWCLTRISIVQKLFVNFIFVNLYP*
>comp2515_c0_seq1
MDQLKIFLITLRIAPWQQNKFLNSHISILFSNFRL*
>comp29220_c0_seq1
MKTHMKSTFSRFSIAQQPTWITPHVVASTYLTETHQPHDHAHAAKHGTSVAQTHILPCGPGSTTFQIACHMFEKMSDLTVSSATTIIGGFAKRHRHEDAFSLFSRMLASNIRPNEFTFGTVLHSSTALGNLNVGRQLHACATKIGLDSNVFVGSALLDFYVKLSTIEEAQKAFSDTEYPNVVSYTTLICGYLKRERFKDALLVFHEMPERNVVSWNAMVGGCSQTGHNEEAVNFFIDMLREGFIPNESTFPCAICAAANIAALGIGKSFHASAIKFLGKLDGFVGNSLISFYAKCGSMEDSLVMFDKLFKRNIVSWNAVICGYAQNGRGVEAISFFKRMCYAGCKPNDVTLLGLLWACNHAGLVDEGYSYFNKAWLESPSLLRPEHYACMV
>comp103593_c0_seq1
MLYQSKHINSANMNRLMTKLLPSANLCSSIDSLPRVSYLKIHTNPISRHLEILSYLQLPRQCKNQTTTNSR*
>comp45027_c1_seq1
MTMAAEIKNRVGPPSSAGDNPNHLKINESRPVEPPKSGCC*
>comp37571_c0_seq1
MDEVLISHNIYKEHPSNLSIEFFYLWCKNKNIKLKLERDKVETHKTKYTNLI*
>comp44327_c0_seq1
MSFTPSRGRVGPFMDLGDR*FVRDFGFCFFWEFPKLGFLIAPFICSNLC*YEVIAC*IITIS*FLFLAMGNRYLSVALPNSFYLMI
>comp353503_c0_seq1
MTFDTFKLSMSTNIPNHLTSISSAILRSCRYAQRGKPYKLRVN
>comp157804_c0_seq1
MN*LQSNPIIKTHLNSILTFFKTSGWYKGTLKSRRLALQMSQHTQKSHIIFNYLFQHAFMHFKV*
>comp27084_c0_seq1
MTQLQYPKGQNPFPNENITTYKLWIMYFLCEPSNIQKSTTPKFRNLCRLKG*
>comp23485_c0_seq1
MPLDTCVAMTQGSIGYWLSNALNQELNKAGIKKQVATVLTQVVVDPADEAFKNPTKPIGPFLTEAEAKEAMQAGAIFKEDA
>comp17217_c0_seq1
MTSSEKRKREKLLTFFEDNYYCSNEEIKNESRCIRSRAE*
>comp245463_c0_seq1
SSSSSSSRSSKSTSTSQQQSAAILAPPVPVQTVTVVRQQPLIPFRPVQPVVQVARLVQAPKTNDVSVNVDHHYSGPNVKYGYSIKQQSHEPVETKGVVVGDRVVYLKK*
>comp47518_c3_seq1
MTLWCMAKSPIMYGGDLRQLDTWTYGLITNPTLLEINSFSSNNTEFPYITSINNVKIEGLGVAKVPSTHSVALTGCSDPKASGWSSEKHNQDLERICYKKNPKKDQEPFCVHKRE
>comp53722_c1_seq1
MIEMNTENKIFNLKGIALGNPVLEYTTDFNSRAEFFWSHGLISDSTYNMFTTVCNYSLYVSEYYRGSVSPLCSKVMGQVSKETSKFVDKYDVTLDVCISSVLSQSKVICPQTQQASERLDVCVDDKVTNYLNRRDVQEALHAKLVGVRKWDVCSNILDYDMLNLEVPTLPVVGSLVKAGVRVLIYSGDQDSVIPLTGSRTLVQKLARQLGLNTTVPYRVWFEGQQVGGWTQVYGNILSFATVRGASHEAPFSQPERSLVLFMSFLEGRPLPEIF*
>comp37923_c1_seq1
MHKIYDFKMAGNKQGRFEYNNTGYEYLYHDNMFGGPLALDIFNPHNEYKVSYFREDVGLNTLYAYATPFPSWMCPMKYNLKGFFRTGEKFYYFHQQLLARYTLERLANALPFVEPFYYDRPIRVGYNPRIAHFNGQSFIARPDSYSFDYAMNKQAINQAEVYEERLIDAIDYGSIWNQTSDTLTSITNDDGINMIGQFFTGSVVHHDNNGKYFGSYYHNLLDALGYMAKTKNMIDYNGGVTTSQLTALRDPAYYNMLVRMIGVFQRLKANLHPYTKKEMMFPGV
>comp202599_c0_seq1
MLIILIFRRLSLITHI*NITKYKIQL*EYYNTATAPLL*FINYKYREGLSSEIFISVCYNLRNHSHRKNKNNIENYKQHFFSRFIIIKDKIVTDKDIEQLLQHNKPLIFYFLFSIKR*FIRKS*RHKPHARCSIKTHTFVMARAISSKIC*
>comp164069_c0_seq1
MFSTHGDWSEGRPLELIDESLGDSVTLAEVLKIIHTGLLCVQERPEDR
>comp59701_c1_seq11
MAVRATVSRFPMDTDAREGSGLLWGVTVTPFAAKDENAQAPLYGSHGDLLPRCDNCWSYFNTFCDLEQWSWSCSLCGNLNGLSSQAIERYSHPQSCAEMMSSFVDLELPTDESSEEAAVQARPVYVAAVDLSSSEEFLELTKSALLAALEALAPGSLFGLATFSHKLGLYDVQGPIPVVKNVFIPPDTEGTLSLGLEDVMPLLQFLAPVETCKDRIASALETLRPTTSWERTMAAGQGLDGVLIGGRGFGMAMEALCNYLGSEYGNTFALARVFAFLSGPPDFGAGQLDTRRYGEQYASKGEDADRALLPEQTPFYKDLAAVAVQAGVCVDIFAVTNEYTDLASLKFLSIESGGSLFLYTSTEDSTLPQDMYRMLSRPYAFGCVLRLRTSTEFKPGNSYGHFFPDPQYENVQHIICCDSYATYAYDFVFENNVGFSRTKSDVPTLQIAFQYTVVVPPQELSNSEEVSTSRTKHSLKRRLRIRTMQFGIAQNIHELYDSCDPEVLLSLLVHKVILASLEEGVREGRILLQEWLVILTAQYNDAYKLVQYSSGSSISSQIDVGFSQCPQLQPLTRIIFALLRNPLLRFHEEGVHPDYRIYLQCLFSVLEPSSLHCAVYPVLTSYTTPDRQAYPRHSLSRAALITSGSPIFFLDAFTILIVFYSSTADPALPFPPPHDCLLRTTINKLKQERCITPKLVFIRGGQDDASIFENFLIEEQDVDGSGLTSVMGFVSFLEDIKQKVLEFMK*
>comp39132_c0_seq1
MAVEPENVLQEFPYSVSDKKKKLDGFALLGTGGAKDPNIAKRDLESLESEQKYDLRKSLAWDSAFSTSPGFLEPEQLFNTVNSWHSQNGCDILGHEEHQLLSAKYLEPEIK
>comp116986_c0_seq1
MCFQQQGYDTHPSRWITWHPHRDNITVLNVDGSCVGNLRRAGFGGLISNANGEWISGFAGYIGLSNNLHVELIAIFHGLRLTWNL*
>comp1961_c0_seq1
MLYK*KCNG*LKKYKSHFLKFVKFSCVKELNFKIQRVTRY*KLKKCLNYIR*RQTCLCF
>comp43677_c1_seq1
MPIIWVKYLCITFSHQATLKEINFTIKTNLDCIDPPEAYNKLPWR*
>comp7672_c0_seq1
MKLIQAQPVCRSNPLAHYQYRASYSSPFQLSLSCPFLYLSIQKFYYQNFIVLNINVATGSKVKTLV*
>comp6250_c0_seq1
KELESHPLKSNDTLINNKCHKTKPYQKTKQIKAINIETNKGAILHGK*
>comp308499_c0_seq1
MMGTSCIGRPLLLLSTLE*
>comp47137_c0_seq1
MRGAFGKPLGTVARVRIGQPIMSVRSNDRYKAQVIEALRRAKFKFPGRQKIYVSKRWGFTKYDREDYEKLKAEGTLAPDGVNVKYRPQHGPLDAWKKVQVELARVG*
>comp32692_c0_seq1
MICLMYLFLWLVEGPGIFLMRLFPWFNSVCLIGAHNLFDEKPGL*
>comp5240_c0_seq1
MCHPSQYPACICYSIHHFIIITQLNFASPLIEYLNSLYEAKFGSLLVIKC*
>comp534084_c0_seq1
MGWVWFGLVPPILLLVYVDLVPCFFLVYVVFMRFACGYHSIGFSFFLKSGFFLMGMYGMEVLDI*
>comp61729_c0_seq1
MGGSSEDFSVVVLASDLGVDARPFLESEIEEENWHDCSPDEDFSDLDLLQFFRFQGSDKNGNLILRLVGKYYPAT
>comp1495_c0_seq1
MDINGVSCTKNKSGATSTIINTQPPLDLYQLQAIFPDRGTCIFPDNRMTLIKHILMQECESSIRWV*
>comp3658_c0_seq1
MCLLTCFLLAFSCFIQSARHFVHANYLISTPDSLIPVSSVEIAVIRGGDFWSLGLRPLYFALDLLLWFFGPIPMFVCSVVMVLVLHYLDSNSRPLHPTRSQGGQFQMAKRGFNL*
>comp162119_c0_seq1
MINCTDGNMDGFLFYNNWQNGSQNLIIET*
>comp48334_c0_seq2
MVMVVLVVDMGMSVLAVVMGMSVKDVLEEGMGMSVMAVLVVDMEMAVMVVLEVAMVMEIRGRWPKASCESTDFSILIKGHSPYIHTFIS*
>comp45320_c1_seq1
MAIVLPPIIIFHTLISLLFSYYLLVITPTGFGFCPILNITLYQIRCPKAKAKAASWSQQYIKVYRLDPPTAPHQ*
>comp40725_c0_seq1
MDGFVKGKMLGDAIQLKRTGYAVLKYSPFLFP*
>comp48134_c0_seq1
MNEVSGSVAKAVALPLVQKCSTVTSLRKARQLHALILTTTVIGLQSPFVDNNIISMYARCGSLRDSQLVFDKMPHRSLVSYNALVAAYSRVSDHAISSLKLYTQMETRGLRPSSMTFTSLLQASSLLEDWWVGSLFHARGVRLGFLNDICVQTSLLNMYSNCGDLGSAEMVFGDMADRDAVAWNSLIVGYLMNNKIKEGLRLFNTMMRVGFTPTQFTYSMVLNACSRLKDYHFGRLIHANVIVRNVSSDLYVQNALLDMYCNVGNTQTASRIFSGMENPDLVSWNSMIAGYSENEDGKKAMNLFVQLQELCFPRPDEYTYAGIISATGSFPSSGYGKPLHAQVTKAGFERSVFVGSTLVSMYFKNCETEAAQKVFYSISGKDVVLWTEMITGYSKMTDGKSAIECFSEMCHEAHKVDSYVLSGVLSACADLAILRQGEIIHCCAVKLGYGVEMSVSGSLIDMYAKNGSLEAACLVFSQVSDPDLKCWNSMLGGYSRHGMVVEALKLFGEILERGLIPDQVTFLSLLSACSHNRLVEKGKFLWNYMNSIGLVPGPKHYSCMVTLLSRAALLEEAEEIIIKSPYIEDNLELWRTLLSACVINKNLKVGVHAAEEVLRLDAEDGPTLVLLSNLYAAAGRWDEVAEIRRNMRGLMLEKDPGLSWIEAKNDIHVFSSGDQSHPKVDEVQAELHRLKRNMIRTESDDNEAQNACYISCRG*
>comp55432_c0_seq3
MRNNEGDKEMETGCVVVEKVGGRSSVIRCLSRYPLKFIIPKKVGSSKTDAVWVYALTYGGGIVSGDHILCKFSVGDDCTMVLTTQASTKVYKSVGSKCSQQILEARVGSNALLAIIPDPVTCFSTARYYQKQVFSVSSDSNLVIVDWITSGRHESGEKWDFDLYKSANNIFLEDGQPLFLDTILLEKEKNGSIQEHMQNYQVIAMIVLLGPKMQYVQNLVQDDVKRIMSEQLQHPSTALSHQREKKSDHFISKPSFMASCSVFGPKRIGLVVRVAAVTTESVYKFLQHQLAPLEPMLGVPPYR*
>comp53104_c6_seq4
MEEYPEELRTPPVTLISMVGCPELHGLISTHLLSDQPPINTLALPDLSKIYLFSKNKDPNSTTNHPSLPPPPPPPVGGILKRDWLVKHRTKVPALVAALFPAQHLFGDPAQWLQVCSDLDSIKTVIRGRNIKLAVVVVHTNAHDEISEDRMIALRKRAEVDAKYVVILNPNDTSELKQSLSRLANLFGELASSYYREEGRRIKQRIEKKNVNSVELIVRYCFKVAVYAEFRSDWAEALKFYEEAYHTLREIVGVTTRLPAVQRLVEIKSISEQLHFKISALLLHSGKVTEAVTWFRQHKSAYRRLVGAPEATFLHWEWMSRQFLVFGELLETSSKTTQSFSPVSLGSSSKPLSEWEYYPAYYYQLAAHYLSEKRSALELVVSMSETSNEIDSGADSVVPSVYVGQFARLLEQGDNVDMLLLTDEEYTRYAVSEGRRFRDSLEIIALLKKAYESYSSIKIQRMSSFCGFQMAKEYFAEGDISNAKQIFDSIASLYRKEGWVTLLWEVLGYLRECSLKNGTAKDFVEYSLEMAALPISSDTGVQRDTGPAGPASLLQREIVHNEVFELVSETSGLATNERTSNLKINGDNSLHLEVDIVSPLRLVMLASVAFHEQTIKPGVSTLITVSLLSHLPLTVEIDQLEIQFNQSDCNFFIANAQKPQSVEVSGIQRHRMETAPSLSLESNKWLRLTYDIKSDQSGKLECLSVIAKIGSHFTICCRAESPASLDSLPLWTLEDCIQTVPIKDPILVFSGQKSSQVEEPDPQVDLYLGASGPALVGEIFLVPVTVVSKGHDVYSGELKINLVDVKGGGLFSPRESEPYSMDSHHVQLLGISGPEGEDDSQLDADKIKKIQQSFGLISVPFLKNGDSWSCKLEIKWHRPKPIMLFVSLGYTPYSAELNAQMVHVHRNLQIEGHTAIVLNHHYLMPFRRDPLLLSRNKQTSDSDQSESLPLNEKTVLIVSAKNCTELPLRLKSISIEVEDDVVERTCSIQHGNEELPTAALLVPGEAFKKVFSVSSNMNISTLRLGTVCLRWRRDLGVEEQSASTTTSSWVVTKQKLPDMNVELAPLVVSLECPPYAILGDPFTFYIRILNQTQLLQEVKYSLSDAQSFVLSGYHNDTVYVLPKSEHVVSYKLVPLTSGMQQLPRFSMTSVRYSAAFQPSHSSNSVFVFPSKPQFKTAASTNIRVESVANE*
>comp35467_c0_seq2
MFPYHFNCFLCNCLEDYVLCLLKIYSWSSTRARME*
>comp200_c0_seq1
MKSVKKKPLAKKKRDRSQPESVTFRPR*LKLKALDKIYNDNNRSLERRRTKKETTSSLTTK*DTKS**SYKRIPV*NSIYQHTYSALRK*DAYNILLCNNFATIPDKKLN*TSDSIISSESSPKVNPTQSLKTSKVVKFSTSVNKTIRKLLEGGGG
>comp18913_c0_seq1
VLLYSNVRAFRYLLLGNTDLQWGCTDRIRRSVRGECEVVKTANLLLHLLRVCLGGKVENREGSKTRVGWKFE*
>comp360307_c0_seq1
MLDLCLFQHIFTTHPKQYSSEYVKMSYIILLACNGDDYLC*
>comp355593_c0_seq1
MPHGVTSFLGGDIWFWMTQLCSVLFCFGPFCRLADDGMLPTIKWSIYWLTKSIWCCHFADLR*
>comp286089_c0_seq1
MIDINMIRRGSPLDPNAHSYLVSSYSHLNTHLSSPRAVQHYFSHSELLKTGDL*
>comp7217_c0_seq1
MIVDRALTLASRPSREGTLLVLSGTAYEAIATASVASINIDFKQV*
>comp201937_c0_seq1
MGISHSVNKSEILSVPNDYPNHIPTQKKELNPPKFYLMHHRVNFSSNKTSKLDLSVSAMAYA*
>comp45203_c0_seq2
CLFGPSEVSSILAVKIPCILHVT*
>comp35450_c0_seq1
MIENKKRGGGITSLIPDSIHLFIFVYERQNEGQQTSTLNNVMLKINANSG*
>comp59148_c1_seq1
MLAMLQTMKASLGWKLRIIEGLTRESEQANTRNYTIQKLKTY*N*KT*KGEEKVHKNRNLAALIREHIKAI*KGLKYLQ*I*HLFCNIFLLKSGTLLLHFIRM
>comp47167_c0_seq1
MSGVEKGSATTKTPADFLKSIRGRPVVVKLNSGVDYRGILACLDGYMNIAMEQTEEYVNGQLKNKYGDAFIRGNNVLYISTSKRTLAEGA*
>comp283181_c0_seq1
MYQSASPSSVSIGNTCHAIKSRQFQYLRREQIGGGVVTHPGCGGSMPIWRL*
>comp56878_c2_seq2
MDSSSSQQEFDYLFKLLMIGDSGVGKSSLLLSFTSDSFEDLSPTIGVDFKVKYVMMGGKKLKLAIWDTAGQERFRTLTSSYYRGAQGIIMVYDVTRRETFTNLSEVWAKEIDLYSTNQDCIKMLVGNKLDKEGHRVVTKKEGIDFAREYGCLFIECSAKTRVNVQQCFEELVLKILDTPSLLAEGSKGVKKNIFKDKPPQSDASSSSCC*
>comp358585_c0_seq1
MAAKVNDMRGKFIRPPLKKIPKYEAKIERMLLNARKEIGFTVALKSVKKDQMTETKEPKKAQPEWSWKQRQQQQAAEAQ*
>comp45825_c0_seq1
MCKINLLCAEKLSNKALSTMAIPKIQTFSLFRRIKVAYHFH*
>comp57645_c2_seq5
MSSLRADLLPCRIYPEPDGSEIDHFDRLPDSLLLLVFNKIGDVKALGRCCVVSRRFHSLVPQVDNVVVRVDCVISDDDSSSSASSSDKSRGPFSNLFRLVFGGIVKPLQALGQFLGPKRASLTTGSSSSTLAVGSGEDGAEGEQGGVTHHSPTQVLKNFNEIRLLRIELPSGELGIEDGVLLKWRADFGSTLDNCVILGASSAIYPGPATKSDGGADALCGNNGNGGGGDDNGSIPDSFYTNGGLKLRVVWTISSLIAASARHYLLQPIISEHKTLDNLVLTDADGQGVLYMNRDQLEELRVKPLSASSASKRTLVPALNMRLWYAPHLELPDGVVLKGATLVAIRPSEVSPTEKKDASDLSWVSNAFQEPYKTAARILVKRRTYCLEMNSF*
>comp54407_c0_seq1
MPSASRRKAKQAKKIRTLITPNHHSSPTVHFQGKSDLISLKEENGSLRPISERNLYVVVEEEKSKEKGYSLSTGAAASANHNKMEGSFNGTLEETQKVESLSEDKEVVIEDIKSSFDFGGEVAADGKSRSLIETQDGDSIITDTDEQATQSEEIRELVHSGKVEEREDVSESVVDYFEPILSSANEFSDARKAPVDNLLALDTVELELKEEQEKDFLSPEEADGISPVVANHGVKGLEETELPPSEDNNDVSSVSGNEGSRETEVVETIKDLTGANEIKLPSSEEKNVLSSVVTDGLTRESEESNKIYSCSSLPPTDVASKETSETTIPISDESDEVPPTITEAVLKGIEKSWLPSTDEKVGEPSDFQGPSKESANESFQLSANVPAAETTSATVQDKTEIPRSIENQTIVSVTQRQYTSWKSCCGLFEILRRDDR*
>comp36789_c0_seq1
MQHSINSCPCYRYLMNPVRSFSDFPLFCSPHGLLHYYAIGFLGRLVIEAFVSTHFSVSLLSESLIVHLFFY*
>comp58840_c0_seq1
MSRGRSDGSQKKRLVASICLVVIFLGFLYVYGGSIFGSQNSGSSALEYGSKSLKRLGSSYLGVDDDADGKQDESSSSFGQGDGEDDIVPKSFPVCDDRHSELIPCLDRHLIYQMRMKLDLSVMEHYERHCPPAERRYNCLIPPPGGYKVPIKWPQSRDEVWKANIPHTHLAHEKSDQNWMIVKGEKIVFPGGGTHFHYGADKYIASIANMLNFSNNNLNNEGRLRTVLDVGCGVASFGAYLLSSDIIAMSLAPNDVHQNQIQFALERGIPAYLGVLGTKRLPYPSRSFELAHCSRCRIDWLQRDGILLLELDRLLRPGGYFAYSSPEAYAQDEEDLRIWREMSDLVGRMCWKIAAKRNQTVIWQKPLTNDCYMEREPGTRPPLCQSDDDPDAVWGVNMEGCITPYSDHDNRAKGSGLAPWPTRLTSPPPRLADFGYSNEMFEKDTELWQRRVEKYWNLLSPKITSNTLRNIMDMKASMGSFAAALRGKDVWVMNVVPQDGLNTLKLIYDRGLIGSTHDWCEAFSTYPRTYDLLHAWTVFSDLEKKGCSPEDLLIEMDRMLRPTGFIIIRDKQPVIDFIKKYLTALHWEAVATADSSSDSDQDGDEVVFIIQKKLWLTTESFRDTE*
>comp50492_c4_seq1
MDPHGHCLLTVRRKRPSLHQRWEGFKGERTDGDKPIFSVKRSSIIGRSRTSVTVEVFDKPGVEYQIEGCFS
>comp374425_c0_seq1
MLTQIYDEVVRRELTFLPHAVEYCHYCLSRLKLLASKLSHV*
>comp59317_c0_seq4
MYNCKDEHLASISLSGDLILHNLASGARAAELKDPNQQMLRVLDYSRLSRHLLVTAGDDGTVHLWDTTGRSPKVSWLKQHSAPTAGISFSPSTDKIIASVGLDKKLYTYDSGSRRPSSCISYEAPFSSLAFRDDGWMLAAGTSNGRVAFYDVRGKPQPFVVLHAYSSSEAVTSLCWQRSKPVIVNESNCTAETALVGDAVEDSILMPDPLPSATSSSISLSTAVSSARNPSRLGASIEASSMTASSGGFTSSILNVSTAEETPHRNHLWPGGTLSRLHAPRSSYNFKDDMEVFSPLVDVQPITPSLWDENGAKKDNMFADRKPSSLLFPSSSRRFPNSEEGSSDHPIFDWKSGSTSKQDVTQSSFPLGGSTPPTSSKNEDSSITPPEAWGGERLSDKYTYPRQPVNAPSRFGMPASGGQTAGSTFSGLQDTSSSAGISSYTNSSLSYANLRAKDVSTSQETSLGFPDQMFSSSLPLSINTKTSLGQANVDSPRMSTLTTPRRFSTYAERISTTSTFSDGVSLSVGSPKIKKSGAETREELLNSLLLKSDISAPTGLGSLPLNNGVMSQQQKASQSDAQGSSFTLQLFQRTLEETLDSFQKSIHEDMRNLHIEILRQFHLQEMEMSSVMNSILENQAELMKEVKSLRKENQQLRQML*
>comp114547_c0_seq1
MSFSLCFYSCISCFVFLKLYFNLHKYKCLHFCRV
>comp47257_c0_seq1
MVVRIRLSRFGCRNKPFYRVMAADSRSPRDGKHLEVLGYYNPLPGQDGGKRMGLNFDRVKYWLSVGAQPSEPVERLLFRAGLLPPPPMVAMGRKGGPRDTRPVDSLTGRFLNQEKPANANHNEDDGEHDTPANP*
>comp202888_c0_seq1
SNILLDAVCCLLVYKKKNSGNLKFCCQLFSRS*
>comp279056_c0_seq1
MSMTVNDLQIKVSSSKLLLILFTMRDKCSFNCHLILILKLLNLSCLLFSVS*
>comp200956_c0_seq1
MVRATCLKALDPSILFFYHVSQQLHVHLPSHFFCQTWSPTYLYECSSTGTSEAHWLYGPLFANAVQHPELAYNL*
>comp59492_c0_seq24
MKNLGYCSCSTFIIIFIHINILVSPYLTYTEGFDSVIQLPHSGLTRTRPRSKRVLYVGDYGAKGDGLHNDTKAFLEAWKIACSLSGFINVVFPSGKTFLLHPIDIAGPCRSKITLRILGTIVAPKDPVVWHGLNKRKWLYFHGVNHLTVDGGGRINGMGQEWWARSCKINSTNPCRPAPTAVTFHKCKNLKVGNLMLLNSQQMHMQFTSCMRVVASHLKVLAPAFSPNTDGIHISATKGVEVRDSVIRTGDDCISIVRNSSRVRIRNISCGPGHGISIGSLGKSKAWEKVQNVNVNGAYFFNTDNGVRIKTWQGGRGLASKITFQNILMENVSNPIIIDQYYCDSQHPCKNQTSAVKVENISFIDIQGTSATEEAIKFACSSTSPCEGLYLENIFLAPCFGGKTRSYCLKAHGSTRGLVYPPSCFSSCDDFIRQKVWLESDPAIHSV*
>comp1570_c1_seq1
MYRRCGDMKSAFKIFSKFSRKCAASYNTMIAGYCENGKIFKAKELFDQMEREGVERDRISWNSMISGYVDNFLLDEALSLFQDLLKEGIQPDSFTLGSVLTGCADMASIRQGKEIHSLAIVNGLQSNSFVGGALVEMYCKCQDIMAAQMAFDEVSERDVATWNALISGYARSNQTETIGELLQKMKRDGFEPNVFTWNSIIAGYVENKHFDSAMQLFTEMQTSNLRPDIYTVGIILAACSKLATIQRGKQVHAYSIRAGHDSDDHIGAALVDLYAKCGGIKYCLLVYNRISNPNLVSHNAMLTAYAMHGHGEEGIALFRRLLGGKVRPDHVTFLSVLASSVHAGSVEIGRECFCLMETYNVTPTLKHYTCMVDLLSRAGKLNEAYELIKNMPMNADSVTWSALLGGCFIHSEVALGEIAAKKLLKLEPYNTGNYVLLANLYASAGRRHDLAQTRQLMKDKGMQKSPGCSWIEDRDGVHVFLASDKTHKRADEIYSTLHNLTNLIRTKPISHF*
>comp294532_c0_seq1
MTDHFRTNRKRTRKNRTKECSPCMVISCVIKSCI*
>comp53171_c2_seq1
MIDGHLILQTSDYRFGNIDIDRILFKYWKEKVTRLHLLLTLKESANNVPQNSDACRRITFFA
>comp49850_c1_seq1
MGTEDGTSDADNSKLAERVQCLKNEAVSNGVEIANGNDVAEEALLMKSGAVNGMVIGDGLDSAERDSAGLECYRTYKRRKHVK
>comp366351_c0_seq1
LSSWKTCHKNQNPSFNRKIITVRENFLLKITQKHPDGVLNSARKYA*
>comp55671_c2_seq2
MAMGKNSRGEGRKSSNYCSTISVAVFVAFCLVGIWIVMSSIVPIQYSGVQVSETINEVKNIVSESGSKQFEDSSGDIPEESTRGDSQTHKSQSESHPENQDDQKGIGKVSDNTAEENQQEVVRESSDEKNDLEKGSGNTIEENYQMRHVKPSTEKKESDGNLNSDSVDTERLGGQINDDELRGLVEALDERKSDKNLNDNKLGTEKNMGEVTQQDEVVGETEEEKIKKNMHSKTKPSTGESNMESHENNQASKEVFITGSQSETLIEASTENGTWSTQAAESQHVKESQKSLIFNDSIKYDWKLCKVTAGSEYIPCLDNWQAIRKLRSIKHYEHRERHCPDEAPTCLVPLPEGYRSPIKWPKSREKIWYNNAPHTKLVEFKGHQNWVKVTGEYLTFPGGG
>comp53833_c0_seq1
MGEEEKKPEETKVEEKKPEESKKAEEKKKEGKEEAKQEEKKPEGSKDAKDGKESKAEAAPPPPPSEIVLKVFMHCEGCARKVRRSLKGFPGVEDVITDCKSHKVVVKGEKSDPLKVLERVQRKSHRQVELLSPIPKPPAEEKKPQEEEKPKPEEKKEEPQIITAVLKVHMHCEACAQEIKRRIERMKGVETAEPDLKNSQVGVKGVFDPAKLVEHVYKRTGKQAVIVKQEPEKKEKAEEAKEAKEEKKAEEGDKEKKGSEAEEKEKKVTAAAEGEGEAKPEEAATEETKVVEVKKNEYYYNPPRYGMEFYAYPAYPPPPQIFSDENPNACTVM*
>comp44284_c0_seq3
MYDAGDHMKFGFPMAFTASVLSWAILEYGDHMDAVKQLQYAQDSLKWITDYLINAHPFADVLYIQVGDPEVDHNCWERPEDMTEERPLTQVNSSFPGTEVAAETAAALASASLVFKEINPTYSEILLGHAQQLFTFADTYRVSYSVSIPQVEKYYNSSGYGDELLWAGSWLYHATKDPTYLNYVTEQNEIAFGNLGSLSWFSWDDKHAATQVQSMMQ*
>comp20767_c0_seq1
HQSRPTPGSKLRCFFVNPSFSPLLFGVFAVCSVCPRNEAK*
>comp57275_c1_seq1
MASFDLM*QTPPVPS*A*NLC*LLT*LLNHPQH*F*SL*SFFKNFATLNLATWPQFS*VYLMGMEAEARVMLN*
>comp339_c0_seq1
IEALQEEIIFLIRSHTHILQEREKQVPQLVFWGLCVLVK*
>comp152859_c0_seq1
MQLQRECFISKLKPYGLTCMACNCKQRSCKLTLTSRIITK*
>comp42252_c0_seq1
MFKTIIFSTNLHSGTLKKQRLKTLRKKFIYANLVRSTIPTDSIEYLVLQNISSSKLNAEEYEC*
>comp212964_c0_seq1
MGKVHGSLARAGKVKSQTPKVEPQEKKKKPKGRAYKRMVYTRRFVNVTLTGGKRKMNPAPSA*
>comp235714_c0_seq1
MVRGKMDARIENVERCLQEINGRAVQDDEWRKDIDRTMREVLDQLRELSHGGKGTRRESPEIGDAGASQESGNRTEKKEWKWRNLELPMFNGEDAAGWIGKIERYFRLKGVREEEKL
>comp58190_c0_seq6
MKLKVYGDRMSQPSRAVLIFCKVNGIEFEEIKVEISKRQQLSPEFQKINPLKKLPAIVDGRFKLFESHAILIYLASAFPGVADHWYPADVSRRAKIHSVLDWHHLNLRHGAAAFVLNTVLAPVLGLPLNQLAAAEAEKTLVSSLSKIENIWLKGNGRFLLGGFQPSIADLSLVCEIMQLELLDEKDRDRILGPHKRVQQWIESTKVATRPHFDEVHNVLYKVKIKLSVQQSNQADGVMKSRIKTSLTSKM*
>comp353063_c0_seq1
MMRLLFVCLLLIDLSNYPQNDIHLLIHP*
>comp2004_c0_seq1
MLLTLFFLFYFTNCAKTVDVVASRFSRLGKPDLNIILCQAQMQTHQNSCKERLCKF*
>comp55594_c3_seq12
MGERETGRETMEKIGKKNMENNEKHVTDDDPKINYRGWKVMPFIIGNETFEKLGAIGTLANLLVYLTTVFNLKNITATNIINIFSGSTNFATLLGAFFSDTYFGRYKTLGFCTVSSFLGLLVIQLTAAFKNLHPPHCAKESNTCKGPTAGQIAFLLAGFGFLMVGAAGIRPCNLAFGADQFNPNTEHGKKGINSFFNWYFFTFTFAQMVSLTLIVYIQSNLSWAVGLAIPAALMLISCAVYFMGAKMYVKVKPSGSPITSIVQVIVVAMKKRRLKLPAEYPMLSLFNYVPPKSMNSKLPYTCQFRLLDKAAIITPQDKINPDGSATDPWKLCSVQQVEEVKCLVRVIPIWISAILYHLVIVQQHTIMVFQALQSDRRLGHSNFKIPGATYYVFLMLSMTLWLPIYDRKVVPLLRRLTGREGGITLLQRMGIGIFLSMLSMLVSAVVEEHRRTLALTKPIGLQPRKGAISSMSGLWLIPQLALAGLAETFTAVGQVEFYYKQFPENMRSIAGSLFYCGMAGSSYLSTLLISIVHQTTARSATGNWLPEDLNKGRLDYFYYMIAALEVMNLGYFLLCSRWYKYKETVRSDLELNSI*
>comp48417_c0_seq1
MMVNKHRTFYLPFLVYFFLYYVFNKGEALISLDLEIKSVLLEIETVVNPFGLAFDRIDKQPNLSQHFSMEHALALD*
>comp39999_c1_seq1
LIFLRINRFSFPCFSVFLLLLLYVSTIFFLLSDSLHILYLQVVSVI*
>comp50451_c0_seq2
MEFKKFIIRGYEGQSDRVQVEDLERRCEVGPAESVFLFTDTMGDPICRIRNSPMYMMLVAELNNELVGVIQGSIKVVTVHSHPPKDLAKVGYVLGLRVAPHHRRKGIGSSLVRRLEEWFTSNDVDYAYMATEKDNHASVSLFMDKFGYTKFRTPAILVNPVNHHSFRISSNIEIAMLKIEQAESLYRRFMGSTEFFPNDIDNILRNKLSLGTWVAYFKGNSAWGDFGSDGQVPSSWAMLSVWNSGEIFKLRLGKAPFSCLLYTKSWSLIDKIFPCLKLPSLPDFFNPFGFYFMYGVYHEGPFSGKLVRALCQFVHNMAAKSKDENCKIIVTEVGGQDKLNHHIPYWKLLSCPEDLWCIKALKNEGTNTFHELANTPPRALFV
>comp380716_c0_seq1
MSIWSVVVFLVLITAVMNTNWDHEAEQFTKRMQENAKDYQFDLKPTDEPNKATKAWDFLQRGFRCCGMKDYHDWEQWTSFMLLRSKRLP
>comp58582_c0_seq5
MAGLSMLDDEVVVDFANTSRELNKPDGFLVDLEQVSERRGAEVEGKLDTSVVEGLSVEVRCCFEQLLRVFLKEICAQNCIRPIPPMLGDGQRVDLYKLFTVVKEKGGYDAVCKNCLWDLVAEESGFGMSVGSSVKLIYSKYLSTLDTWLKKVADSKVPECRLVGDRDNFGRRLMELQAEVKGLLSDCAEEEVGEEFKSDYDYPDGMELCDTNRVKGMNPESNGDKKVQNGGHPDLDMPDHRMNESILGNLCNNNDAKEAPEEFHGGKMSAKRAVDVSDVVNSMPGLSSGGKKCDNDVGVLIMDPLCVNKESFGCKRKRESKSDLLSWVTGIAKNPCDPVVGSIPEKSKWKSHSHQEIWKQILLFREAVFLKRGFESSSEQSSWQGQKMHPCMYDDHPGATYNLRERLKCDKRLLFGKPTSAVQSSSDSSVGTKGDLERTPSPHTEDCAEKQLPDSSDAHSGLDRCATVRIPLGPSHQAEVPEWTGVTSESDSKWLGTRIWPSEKVNSKLLIERDPIGKGRQDSCGCPVPGSVECVRFHIAEKRAKVKLELGVAFYQWNLHKVGEEVRRLWTEEEEKKFKDVVKSNPSSPERYFWDHIFRSFPTKSREDLVSYYFNVFILQRRGYQNRHTPNNIDSDDDESESGPLRNVFGHQTQNSRGFTLLSPKKPQTKGR*
>comp296544_c0_seq1
MNSLSQYSPIKNTELARPNHKSQRQTEGSLQLPNLILAFLGLTTSVLTKALTYSVPSHVK*
>comp266973_c0_seq1
MAKKILFLQKKVTVLAFVSLPILRKHHLILYCFQITKVAIKWRIKIKY*
>comp59618_c0_seq7
MVNLILGTGSDGIEYLSKELLEGSFDSQQKKDLRKMADDELVTVDSKSEDEKFDLASSKKAEDWKANSGQKSSQVGSSPRRGLEHCVTAPVGTGRNPLIADHEIMFSRSMTEKRGFLRHDLILDRLSEREKQQLIVDLVKIQNDGTVEVDIEKSASVASEFLEFQSFEESTVSRSLISESKKSVPQLQIVILVVGTRGDVQPFLAIAKRLQEYGHHVRLATHANFNTFVKSAGVDFYPLGGDPRVLAGLMARNKGFIPSSPAEISIQKKQMKAIIDSLLPACTAPDLETGVPFRAQAIIANPPVYGHAHVAEAIGVPLHIFFTMPWTPTYEFPHPFARVPQSAGYWLSYIIMDLLIWWGIRGIINDFRKRKLKLAPIAYFSMYRGSISHLPTGYMWSPHVVPKPSDWGPLVDVCGYCLLSLGSKYQPREDFVQWIEKGPKPLYFGFGSMPLEDPKRTTDVIMEALKETEQRGIIDRGWGNLGNLAEVPDNVFLLEECPHDWLFPQCSAVVHHGGAGTTATGLKAGCPTTIVPFFGDQFFWGDRICQTELGPAPIPISQLNVENLSNAIKFMLQPEVKSRAMEIAKLIENEDGVAAAVDAFHRHLPHELPLPTPSPSPVEEDHPHPLQWFFLQLAKWCCVPCGGV*
>comp44201_c0_seq4
MRKGKFYKGFRLKLRLKSCLLSLIASYILHSLHELLLHFLITMMMIIIRKYFQPFVAFFLIFVTDLTVTNQVISCNISKEA*
>comp127496_c0_seq1
MP*KK*KIEFELKHHKLIKERKKPLLTPLPMCVSASHHRAPYCRATTSVSLMSKTSVVVFFFPFAVLLPDLCDCNTDMNQYICICSFFVTQFM*
>comp59136_c0_seq72
MATVTAHKWLTHFTNTKCSILVPPVPKRQPMMYSIHHHHKPVCQGCSLSMNGCREGQQQHARTPVGTIETRTLPPVASHAMAMHSLNWAISQLKSENPFCTSSGILRVQVPIEEQIEAIDWLHSQSHLLLPRCFFSGRETNPCHGNLVSVAGVGSAVFFRQPHPFSYWDWISIKRFLSEKCPLIRAYGAIRFSTKTKVSSDWLAFGSFYFMIPQVEFDELKGGSMLTTTIAWDNALSWSWENAINALQAILCKVSSAIVKFPKQAPPTLILSSYNIPSKVDWDLSVNRALQMIERNDSLLTKVVLARSTRVVPTADIDPLTWLACLMVEGENAYQFFLQPPNAPAFIGNTPEQLFHRKWLHITSEALAGTRARGASLALDRQIELDLLTSPKDDIEFTIVRETIRRKLEAVCEKVVIKPKKMIRKLPRIQHLFAQLAGRLRSEEDEFEILSSLHPSPAVCGFPTDEAELLIAETEVFDRGMYAGPIGWFGGGESEFAVGIRSALVEKDLGALIYAGTGIVEGSSPYLEWDELELKTSQFTKLLKLDLPQRQKVDCK*
>comp15642_c0_seq1
MEKSRKGLCFKCGDKWGLEHVCKFKHYQLMLMEAGEEEEETKLLKDGEVLEVEAKTLHLSLSSKEGLTSSQSFKIWGKIDESPVLVLVDSRATSNFISKEVVRELNLLVEDTAENMIEVGTGEKVKNKGVCKRVKL
>comp13759_c0_seq1
MKAVRKFRHFGLFSFGCCAMATRRTYIGCNIDMVQTSNTPCLVA*
>comp247174_c0_seq1
MSEFCSNWREMYGLDSALIEKYCGTMQYNLEFLFQNIQEQIDAKKTKLIQEVESQLCEFDQLQKDLSLRIEQQYDSEQPLTEVIKSLNAQLEQYRQMKAERIQKLVTLKEKERELCEFLGESPCKILVSCPSDAHLDEIQ
>comp354504_c0_seq1
MDLQIGIFCLVIASVSSLIIYIVLSISSIKEDSFEEAKANRRKIIKQYHESKSGVDKSKDKKLKKTTKKSKKNEADEEVSSSKEIEAQGIEEKE
>comp90353_c0_seq1
MFSVLFSYILVCCESAHTNPTKENLQRYKSACCH*
>comp307261_c0_seq1
MDVTGGLPKTRGVDTILVVVDKLTKYAQFIAICHPYTAKDIVEVFTKEIVKLHGFPSSIVSER
>comp407226_c0_seq1
MYISQNPPDLVLIESHHLRREWNYHNDMDLETKTFILLTFLFNYLFKLPVSVWNPFPDLSSHEFNAPITRSKF*
>comp18563_c1_seq1
MVGTGGLW*FCVHGGKSRKKLN*GRTIAED*IN*VSYWRRICP*CYSGSVEKQGVNPGCFSWFPCDG*SHTLLHSTSLAEVCNKSYVTLGEDK*TIV
>comp54013_c0_seq8
MAEEAEKVALDEKEKGMSMTPWEQHSSVISLPRFDYNAPSSLLQHSHRGFLITCTIKREKSATKEVMSILHKFAGPFNTGGYDSLKTPKENNTSKRRRICSEDIGEECLDIEETKCATASSEDGKLLSPAKAETDTDRVPDLSLVKLTRSGLLLFTFPKNTLPDTVDIVSNIVQALESGSVSLPVWCHRIFPIQATCGLNEKELQEVVSTLVKKFVADKQDKLERPLKFAVGFNRRGIEETKFVKENSNGSNAFSLLDRNRCFGLVASAVNHVVEDSVVDLRSPELSVLVELLPLSRVPNGSIVVAVSVLPRNLVSTKPRLCVKALTSNAKEGSAAQ*
>comp47856_c1_seq1
MHRCLFTLLGHLDYIRTVQFHHENPWIVSASDDQTIRIWNWQSRTCISVLTGHNHYVMCAVFHPKDDLLVSASLDQTIRVWDIGALKRKAGSPPSAADDILRLSQMNSDLFGGVDAVVKYVLEGHDRGVNWASFHPSLPLIVSAADDRQLKLWRMNDTKAWEVDTLRGHMNNVSCVMFHAKQDVIVSNSEDKSIRVWDATKRTGIQTFRREHDRFWI
>comp22926_c0_seq1
NGLWCYGCVSKDQGTLPIQNSLSRAHNHTRGLLTAGSPTN*
>comp47327_c0_seq1
MVAPFLLFLFHLRALLKIPIRPCSKSFELLRFRKVHAYLNEVTTIAVIA*
>comp3009_c0_seq1
TTTTKKKNNNTTLQRLLIGSYSLSISAPPKHTEQNRAKDPSFLLLLFVRENLIYSPSSLHSLTTN*
>comp60993_c0_seq1
MGKPFVVVALIVSAFCFSSVLGLAPSAEHFFVEGKIYCDPCRLEFETRLSHPLSGVKVSLECKKPDTGSLTYSSESYTDANGIYSVPVEGDHEDEICEVRAGNSTDAECNELMGGRNSDKVVLTKNMGATNLVRYVNPLGFKKQAINAQCADVIKELGLDNLDD*
>comp319676_c0_seq1
MKYRFPKQKKTSTQTLNEKETHKFGYISIYRLLTFPLRGLFRQADKMHHKFPDQSFIRKSRKS*
>comp48883_c0_seq1
MYSVLSLLACAVLLGVQVQAGFFNPTTPVPITTSTEEPTTTEAPTTTEAPTTTEAPITVVPPTTTVAPHPTGFVTCALHVIQTALKKNKCAGIPNQLGHLIHVGISNLQSDIDLVLKHAHQAVRACLFKFGDILGCGREMMQLPTHLTHLFTSVVRHASVLIEALLRLGEHTGACLSSVLQFRDVVVGIGRCLW*
>comp59774_c0_seq1
MFEQTLPAGYIHLPLDVHAMKRKELKKETKIGSVELIPKGIRMSVAQFGSLYMAERYAMYNTL*
>comp57637_c0_seq3
MAAVVVGRRVRSRRKWKKVVGVLRELEEGCDTTVGRLRQVVDAMAVEMHAGLASEGGSKLKMLLTFVDNLPNGTERGTYYALDLGGTNFRVLRVHLGGQQSSVLEHEVERQPIPHNLMTSTSEDLFDFIASSLKEFIEKEGDGSKLSLDRRRELGFTFSFPVKQMSVSSGILIKWTKGFSIVDMVGRDVPACLQEALTRKGLDVRVAVLVNDTVGTLALGHYHDTDTVAAIIFGTGTNACYLEQIDAIIKCQGLLTTSGRMVVNMEWGNFWSSHLPRTLYDIDLDAESPNPNDQGFEKMISGMYLGDIVRRVILRMSLESDMFGPISSKLSMPFILRTPLMAAMHEDDSPDLREVARIFEDILEIPDVPLKVRKIVVKVCDVITRRAARLAAAGIVGILKKIGRDGSGGITGGRRSDMKMKRTVVAIEGGLYSSYALFREYLHEALNEILGEDIAKHVILKVTEDGSGIGAALLAASHSSYNVDKVQLL*
>comp290769_c0_seq1
MGCKEGEEREKVKAIILLFVWKILRKGRHSPSYPLKPPFL
>comp279597_c0_seq1
MILSFMK*ETLPLFIEK*STG**VGNLVFCYRIYFYMLKVCYVIYPQHEI*
>comp47466_c1_seq1
MLCIMVRAKNLMNGECTKSKLWLVDLAGSERLAKTDVQGERLKEAQNINRSLSALGDVISALAAKSSHIPYRNSKLTHLLQDSLGGDSKTLMFVQISPSDQDLGETLSSLNFATRVRGVELGPVKKQIDTSELQKLKAMLEKARNECRNKDESIRKLEENLQSMESKAKGKDHIYRNLHEKIKELEGQIELKIVMQNQSERQNFQLSDKLKVKEESCSTLQHKVKELEKKLKEQLQSETASFQQKVWDLEKKLKDQLQGSESQSAILKDKVKELERKLEEQEQSSESLLHQKMKELEDRFREREQQWQQTHCFVDAVKATPDVGKSCTSDEYPSEIEPGILRCSNSVNRQINQGSTLFKGNDSIHQIRSKREFRSNETENNFVMSSSLHDRKVTRKSDPPKIGRVGRATKPAIATQAPLSHKRASTSRDQVQGIRERDSKKKI
>comp299173_c0_seq1
MREEISAAVVFLGRLLEKSAGCNPDKLEDFKERLREALEERFQDHWFPENPDKGQGYRCIRVNGVNRREPTLEKAAFACGIRYEDMNLPCELTIWVDPNEVCCRFGENKGSFCTLASFSDKESSGSASGGEEFERSSSSLSSSPQSSSSSSSLSSSSSSSSLSSSGSSPSAKFTPNKGNGWRRERREGAGRRNGAGHLARGMS
>comp38956_c0_seq1
MCIRVTSHPNFSPRHRRLRQPNRRPKLCNVLNLDPRNLHLRSSVFSLQKVQPQNRKKKQSMESRATDSNAVTTLHTNSSTMDRFRRLDHLGMIYDATISGHRITDDRTEKSKSSHRNADADHLLAMSTK*
>comp102431_c0_seq1
MAKLKNWLMNKFNKWYYMVYYHSSESEMHENLQVSNKLNYY*
>comp49189_c0_seq1
MILIIFFIFSLFSFSHASVLDFCVADYTAPNGPAGYSCKAPAKVTENDFVYTGLGMAGNTSNIIKAAVSPAFDAQFPGVNGLGISIARLDLAVDGVIPLHTHPGASEVLVVVEGTICAGFVSSANTVYLKTLEKGDIMVFPQGLLHFQVNGGGSSALAFVSFSSANPGLQILDFALFKSDFPTPLITQTTFLDAAQVKKLKGVLGGTG*
>comp28913_c0_seq1
MGSVAETGMEQLTSGASNRIIPIVKAMRASLIFVYTFILTFLLFILPRRRRLSSPASLAAPPSSPKKHLKRRWLIREEEDTFRRRALAQDVGMGHVDGCCRWTTSIFYGLRKNALFCRSWFPLSGDLKGILIIIHGLNEHSGRYVDFARQLTSCNFGVYAMDWIGHGGSDGLHGYVPSLDHVVADTGAFLEKIKLDNPGIPCFLFGHSTGGAVVLKAASIPHIEEMVEGIVLTSPALRVKPAHPIVGAVAPLFSLVAPRFQFKGANKRGIPVSRDPAALLAKYSDPLVYTGPIRVRTGHEILRISSYLMRNFKSVTVPFFVLHGTADKVTDPLASQDLYNKAASEFKDIKLYDGFLHDLLFEPEREEIAQDIINWMESRLNTL*
>comp136804_c0_seq1
MYFLSFLFFYLWFQFSRRATDFHLLYNFPSIFFH*
>comp263151_c0_seq1
MWNFFVIQMAPCYLWFFDLYNLSLIPVNSCAICYFLFSIKR*
>comp4916_c0_seq1
MLSVITISNARLSLPLILPWNLLKSVYLLGNVLFLHQCSTNTIPAIEGYLSSNSLVSHSKIEFPQGL*
>comp530479_c0_seq1
MAIYDTMLKFKMRSVQFWKQGRSLKFSKSLRWSI*
>comp36760_c0_seq1
HHHHHHPQLLQHLCTFLHLDQPKPCRTRKNRSLAQRASGKSCRRTILRQHPRS*
>comp39978_c0_seq1
MLGSTFSLPQERTEGIMTNLILDSKFTEVADIDKQKGENLVLASYHSDKNSRSQKASLERENLSERQANARPVEVTCGGELEREMEDEPNPPKLGEGDNPAWSAQSNSSSTNSAHISDGQEFGIKNHVERQREILNSKCSIPHWTEEQLDELLAFD*
>comp247157_c0_seq1
MRQTKEEMEKYKDECDEFVKRLQLEVKRREEAESEVAALNRRIQLLEEDLERSEERLATATAKLAEASQAADESERIRKALENRTNMEDDRVAILETQLTQAKQIAEEADKKYEEVARKLVM
>comp57458_c5_seq7
MAHATKFVHPFRLRLRLTLRHSSPYSSISRFNHFFTTNYGKFDSVKTLLKKTLQLSLSPRAFIFQSHLNINANCLRNFHFSGSNFSSGSILGVSIASASIIAHAMDAGDALVDDRCNDSLDLSEEEENVHLLWKLARKFWLPVFFFLTVLTNLDDPITILFIKVTLFLLSTKPNPFSVYIFVDQLCQQYMREETGFFKVKSLYASKVEVQDYKLLCLAAVEVGDQKFTLVGILGTWWTLPNLPFWRAFSLVRNRLGIILVKTTEQGNLLI*
>comp22874_c0_seq1
MVKVLSIEDGDRIRFVGDLQIKAFCPVINLIPAVDKKKVSRTYLLNDAVCCEVIEAVPEADKLVLGMKGTMLPPGSDQHSRLGLIFSEDFPDVFRRIQDRTDESFDTLLKSNVAFNNPGSTTFLATSMGLQNKNYSHIGGLR
>comp141888_c0_seq1
MVDNQPSSVRGWVDNLVKITNEHTSST*
>comp350392_c0_seq1
MQQTSQNLQDRKWKNQRGENIRLCPFNCYSQTDPTNKTSYNFIYSYSNTTFSYHNMQIN*
>comp259542_c0_seq1
MLYIPFFVILSCCCTLLAYRLVLSWFLLIKFYLLDKEGEDDTNVERKSKY*
>comp34262_c0_seq1
MRRVHYIPHPAKRKLHVKNKEMLSTSSVPYNSIIKSHLFSDKWSSNANQLVPYHSINHNLIKVCKVKIKILLSIKIYVKEPTTQQLKLVGASPEMVFLYFHTHFPSCENGNNKDQILDHLFEEALLPYQRVNYPKSLS
>comp51510_c0_seq1
MRLEEGYIKEGSTVSVMGVVQRNENVLMIVPPPEQITTGCQWTKCIFPASLEGIVLRCEDASKNDVIPV*
>comp33368_c0_seq1
MPDCPLSSGLWSFGQISMLKCQY*
>comp478979_c0_seq1
MGNYISCTLSTPGSKHSRAIKVIFPSGEIQQFKEPIKAAELMLEMPSFFVVNT
>comp166123_c0_seq1
MEQKFSCNNNILVLLHELAINKMLCHKIIYSNIRWPNFRLGSNPEDNIHQLFCALSFIIEHCMKHVALYGYIFSNSCSSIYIGYETTTPFLYWGNLFYYAWD*
>comp178961_c0_seq1
MVPFLFFFFWKNRFSKKTYLKNDSVILWMFVLSCIQD*
>comp56483_c0_seq8
MENSQQVLVKVEMTEQTKFSVLCSLFTWTQRSKSPAKKRSKLRKFLDSFCKDKNYFAAIRLILPNLDRERGTYGLKESVLATCLIDAVGMSRDSEDALRLINWRKGGAKAGLNAGNFALVAAEVLQRRQGTASGGLTIKDLNDLLDHLSSTENRAEKTLVLSTLIQKTNAQEMKWIIMIILKDLKLGISEKSIFHEFHPDAEDLFNVTCDLKLVCEKLRDRNQRHKRQDIEVGKAVRPQLAKRVANATEAWRKLHGKEVVVECKFDGDRIQIHKNGTEIHFFSRNFLDHSEYAHAMSEIMIQNILVDRCILDGEMLVWDTSLNRFAEFGSNQEIAKAARDGLDSDRQLCYVAFDILYFGDTSVIHQTLKERHEILRKVMRPLKGRLEILVPNGGLNSRRSSGEPCWSFIAHNVDEVERFFKETIENRDEGIVAKDLSSKWEPSDRSGKWLKLKPEYIQAGSDLDVLIIGGYYGSGRRGGEVAQFLVGLAERPSPNTHPKRFISFCRVGTGLSDDELDAVVTKLKPYFRKYEYPKKRPPSFYQVTNHSKERPDVWVDSPEKSIILSITSDIRTIESEVFAAPYSLRFPRIDRVRYDKAWYECLDVQSFIELVHSSNGTTQRDTEYGSKQDSKPKRLKRGEKRNISIVPSHLIQTDVSNVKGGSLIFSNMMFYFVNVPPSHSFDSFHKMIAENGGTFSMNLNNSVTHCVAADSKGFKFEAAKRHGDIIHYTWVLDCYAQKKLVHLLPKYFLFLSELTKKKLQEEIDAFSDSYYLDLDLGDIKQLLCNIHRSEDISIVDHYRKKYCPKDKWSFFYGCSVYFHTAIPSLKGDWKFLLGLALRRFKLEILMGGGKITNNLTCATHLVALSVPGYYVNFEEEIQRSFTTLERRFLCSKKLHIVKSQWLEDCLDSSQRLPEETYSLKPSGIEESTAEECEHDLALEAHLGGDNVEYQNISSSDKGSKQRSAKDAHEDGMALSPEKGGKRKRGRPAGRGIKKVKTAGNQAQRARAQIVKKRAKLCEYESDESDSHDKKPYEEEIDTRKGSLDYYTKHSEPQETQKRAEVQLTETIESSERNKTVKQEDLKDSERERMFVPEIEMDDRHNDQKSKMTEKLEILADPVQAMLFDMIPSLAMKNVEETTSRNVGEEKPPEISNAEPIKKKKVSYKDVAGELLKDW*
>comp36812_c0_seq1
LLYSFILGTTLSLYTLFLSLSISPTNFVRIQFWASFQSEILFLLIGSSLI*
>comp55564_c0_seq15
MAENLDDGEFWLPPQFLVDDEIATEKKTTVDDAIAASSRALFPCEFPYGFDLSSPVESLVGSSETESDEEDHMAELTRRMAHSTLENDFNHGFASQKPKGMYVSGSPQSTLCAFGSGCGCRKGSSHGSPNSACQLSSPRATWDLLHAAAGEVERMRLSEERYGFGYHHHGGLLGPPRKPSSPVTTNLPARDANPGVGFYTQQSLSHQQLQISQFQMLRQEQMAKQQNSVWGVQMKQSNQMVPNRGRKSDVFGGRNVRPMGLSPSAWPPLQHAKQQQSQQYGSGMRAVFLGNPSGKRESAGTGVFLPRRVDCPTESRKKPTCSTVLVPARVAQALNLKLENMVGGQPQHQPRFNGTSNMENAAIPRLRSNYGLSQQKRNLRPQQPPVNHEIRLPQEWTY*
>comp51030_c1_seq1
LSLLILKLSFYHFFLSSCSHFRYSDPQPLFYILRKLVSLSIHIASADCAFDQVRKTPVFHSNV*
>comp292895_c0_seq1
MWHKKTTNRPILMVILKITNALYYQVCMTESDEA*
>comp167048_c0_seq1
MEMELQLLISFLVSALVYFLFRPYFHRHHLPPSPQPRLPLIGHLHLLGPLVHQSLHRLSLRYGPLFSLHFGSVPCVVASTPYFAKQLLQTNELSFNCRIETTAVKRLTYESSLAFAPYGDYWRFIKKLSMNELLGSRCINNFQHLRAQECHSFLRLLAQKAKACEAVNVTQELLKLTNNVISRMMLGEAEEARAVVRDVTKIFGEFNVSDFIWLFKKLDFQGFGKRIEDLFQRFDSIVERVICKREQMRKNKRMNHAESGRGEEEMTDFLDILLDCVEDESSEMKINRVHIKALTMDFFTAGT
>comp57082_c0_seq10
MAETSSESRVHEDHSNNNNIPIEIVSDEEMALIEAAFASARSSLSFSPIRSPHFNTNRNAISINSITFLSKRRLSCSTQPDMEDSANLMSTQKKIRVPDSFLHRFRRKRALSVTDLTSTEWCPKQMEFALLFGGRKTNQAMRAGIARHVKLEQEVVKRVAVKVKSREDNWALKLLNFINGVNQLLFEGLTRELPIFDHDGLFLLLISE*
>comp253074_c0_seq1
MYICHLGGILLAINLSLTKQQAHLSTQVNEDILLARDHQ*
>comp166261_c0_seq1
MKTIS*RLEKAAI*Q*HSSGWQFQLHIKYSGQTGTTKFNIDFFKFSF*NSHNVTILILQKMI*
>comp53631_c0_seq1
MNEVSCFMPKQ*LINK*RKPLRI*RHIL*LSSRNRTEASRLVAGDSAQELHGS*ECVIHS**NKCFRHLTCSCECAVHCVNTKICWCPIEVVGLLPPSSMIQM*
>comp48115_c0_seq1
MATIQTIKARQIFDSRGNPTVEVDLTCSDGTFARAAVPSGASTGIYEALELRDGGSDYLGKGVSKAVDNVNKIIAPALVGKDPTQQTDIDNLMVQQLDGTVNEWGWCKQKLGANAILAVSLAVCKAGAGVLKIPLYKHIANIAGNKKLVLPVPSFNVINGGSHAGNKLAMQEFMVLPVGASSFKEAMKMGVEVYHHLKAVIKKKYGQDAVNVGDEGGFAPNIQENKEGLELLKTAIAKAGYTGKVVIGMDVAASEFYKPDKKYDLNFKEDNNDGSQKISGDALKDLYKSFVSEYPIVSIEDPFDQDDWEHYAKLTGEVGANVQIVGDDLLVTNPKRVQKAIDLKACNALLLKVNQIGSVTESIEAVKMSKRAGWGVMASHRSGETEDTFIADLSVGLATGQIKTGAPCRSERLAKYNQLLRIEEELGSEAVYAGANFRTPVEPY*
>comp16235_c0_seq1
MNCLPPFIIYGKFYFPTIELDWVHSCCFGIFNSRYIILFNFLNYLSPMLTLI*
>comp48123_c0_seq1
MCGGAIIADFIPRHRGRRLTASDLWPNTFGKQNEFESLFDCSPLVQQSAPLKTSHPLPSPVNEQVEKPVKRQRKNLYRGIRQRPWGKWAAEIRDPRKGVRVWLGTFNTAEEAARAYDREARKIRGKKAKVNFPNEDDVHSVQARPNPPLPLYQQHGCSLNNNVPKSLNLEFGYDLEAIPSHGFESTPVGAINTDPVVASVDESTGSGSDGSYSTTEFMGSNQHVNGYYAEVKVNAKEGVIGTPQERNEVEKLSEELMAYENFMRFYQIPCDGQSAAPNNVQESVVGDLWSFDDDAIPATVTSSAM*
>comp50379_c1_seq2
MTIAKKEKNTHDDPTSCEHGVVAWSSPSYIYLFNVDSSLMDNLGTISISCLILVLDAGPLYEILILDIWMLMQRFWNSGSPSHPCPSKRECFLLICSFTCS*
>comp36988_c0_seq1
MLQAIGPQRKFLQLLQGTYPNLHLEGKVNLLGASIVRHPYAGRYHVRNVRDEKENK
>comp53410_c0_seq3
MLNISLNKLSSPLPLKLLRCWLRLRLETVRPEEEIFSPSLDKYMCCTNR*
>comp37949_c0_seq1
MSFLPQICQWFSLSYFETNKMLIIVVIKKIDFLKSFFSSFHVAQSLRLTCRHITCLMTLPIAELENYFFKKM*
>comp110252_c0_seq1
MLHMGKHDKKVQNTCFILQVQIAELHYRDSETIQVKIQLFIQ*
>comp8561_c0_seq1
MEIMVNSYHHQGVKRLAQRFVPTAFAPDGLIEGFYDPKAFNPEEGKFIMGLQFHPERMRHPDSDEFDYPGCTMAYQEFVKAAIAHMKKLSCSTFVPSATKLSEELELKRKVILKSFSVARNIYRSGSQVVTNQSSELEAGADFLQANTALSLQQENRLKQVGATIRNGSVYTQKLKMNQEREKVARTMMGNMSIEQLSELMSFYGLMRQICSETLERKIHELVQEEI
>comp43000_c2_seq1
MQSKVPAFLGSMHNLKNLNLSGANFKGNLPDNIGNLSRLESLDLSDNGFSLTVNNLSWLHGLSSLKFLDLSGVDLSSSANDWFRAISMLPSLAMLRLSGCQLHNLPPSPPEVNFDSLITLDLSTNHFKNTIPDWLFENCHNLQHLNLSNNQLQGPIPDSIERPMSLAILDLSNNYLSGPIPSTLGQTHSQNDLGIHSSLKELHLSNNNLS
>comp56581_c1_seq1
MFPLKIQPVDVDSQTVKEPPAVVVRNDAAAKPVLKSRLKRLFVFDRQLRTSSSEKTIGGEAPQFEPSSVCLAKMVQN
>comp55185_c0_seq1
MDTFLFTSESVNEGHPDKICDQVSDAILDACLAQDPESKVACETCTKTNMVMVFGEITTKANVNYEKIVRDTCRGIGFVSADVGLDADNCKVLVNIEQQSPDIAQGVHGHMTKKPEEIGAGDQGHMFGYATDETPELMPLTHVLATKLGAKLTEVRKNKTCPWLRPDGKTQVTVEYRNDNGAMVPIRVHTVLISTQHDETVTNDQIAKDLKEHVIKPVIPAEYLDDKTIFHLNPSGRFVIGGPHGDAGLTGRKIIIDTYGGWGAHGGGAFSGKDPTKVDRSGAYIVRQAAKSVVASGLARRCIVQVSYAIGVPEPLSVFVDTYKTGKIPDKDILALIKENFDFRPGMIAINLDLTRGGKFRYQKTAAYGHFGRDDPDFTWETVKILKPKA*
>comp54943_c0_seq12
MSESNAVANGLAGAGGGIIAQIITYPLQMVNTRQQTERTLKRNKQSLLLHSPNRTGTLLQILQVIRSEGWGGLYSGLKPSLLGTAASQGIYYYFYQVFKNKAVAIAATRKVKGHGDGTVGMFGWLVVAAIAGSLNVLLTIPIWVLVTRMQTHTQAERKIMEEKKEALRREASESSLASSTLQDKLAELDSIKPQPYGTLHAANEVYNEAGIVGFWKGVIPALIMVCNPSIQFMIYESSLKQLRAKRSAKKQGDKNVTALEVFLLGALAKLGATVSTYPLLVVKSRLQAKQEIGGNNSLRYSGTFDAILKMIRYEGLPGFYKGMSTKIVQSVFAASVLFMIKEELVKAYMVLADKSKKFLLNLK*
>comp476484_c0_seq1
MPVLVFIMVYIIDTLSVCNNIHTNGKGCLNLLIKTEKQRKKENKNPKE
>comp55017_c4_seq1
RHCSCTTKNKKEHYQRLYKIALIPNIIVSLIIIYETTNIKSECTGFNFFLSHSIRGDHVANFKL*
>comp710_c0_seq1
MQVPAPSLITTSN*NDKHEKKKKV*LETIIAFHGFQIKIPFMLGSCRSYFIKYSEVI*
>comp37814_c0_seq1
MILLCIAKAKRNEREQCLEQCMKKKKFNQIIGNKFQLPI*
>comp50338_c0_seq1
MEDLDYKLNGQSQNSSWVEKSHKVVESNSQENNNHNEGYIVRGVEIAQGHNCQEVNADGSESPNASYGEETEYSLPDDLDLLNWEPPEPE
>comp18096_c0_seq1
MKRMKMTLFWMRKCRRWWMKWLGCDGGLEFVEIWEEKEGI*
>comp41850_c1_seq1
MYHLRRSQFLQVFNNSPDETSYYRHILMREDLSQSLIMIQPILYSYSFNGPEPVLLDTSSIQPDRILLMDTFFQILIFHGETIAQWRAQRYQDLPEYENFKQLLQAPVDDAKEILHTRFPMPRYIDTEQGGSQARFLLSKVNPSQTHNNMYGYGGESGAPVLTDDVSLQVFMEHLKKLAVSSTA*
>comp321751_c0_seq1
MEVAADVWKDLKERYYQGDIFRICEIQEELYFAKQGDMFITAYFTHLKSLWEELENFRPIPGCSCQVACHCDLVPTIKAYRQNDHVIRFLKGLNEQYATVRSQIMLMDPLPHVNK
>comp132026_c0_seq1
SILDVILKESGKSIDCSYDQYQKEQEEKHSAEVILKNQKSLFQQVLDLVGQNFLV*
>comp36475_c0_seq1
MVNNRDNHESQENTVDEIKTYLDCRYISPCEGSWRIFGFPIHGRTPAVERLYFHLPNQQSVIFNDVEDIDSLLSKPGVKESMFTSWMD
>comp752_c0_seq1
MHYSTAINLLKWKNTYQGTHTKISKGLNNDENFESSAKRSP*
>comp53913_c0_seq1
MLYTRYAIPKFPRILVCLPYAQNVRFYGHLQRQYAQKFSVFDNVDDAVASFNRMVRMRPPPPILEIDKVLGAIVRMGHYPTAISLFTQLELRGITPSIATLSILINCYCHEAQISFAFSVLGSILKRGYQPNMITFNTLIKGFCIHGMISKALGFLDDLMAKGYLFDEVTYGTLINGLCKNGQTRAALQLLQKMEDQLVKPNLVVYSTVIDGLCKDRLVTDALSLCSQMTARGISVDVVTYNSLIHGCFSVGQWQEATQLLTIMVQENVNPDVYTFNI
>comp22845_c0_seq1
MAATLPPKSTGSTKLDSVVQNISANEPKKLSGIDLYSRFAFAGAVCCSVTHGGLTPVDVVKTRIQLDPVTYNRGLVGGFRQVIANEGAGALLTGA
>comp42671_c0_seq1
LPTFLLLSPPQQTRIGPLRPPLLGTLRLKAAILGEFRGLIQEHFSESEDFSEY*
>comp11764_c0_seq1
MSCSKFMNLKYEQNYRGIHQQNYSSKDDSNYKHTTLGQMSIYAKQSCP*
>comp58554_c4_seq2
MKMGKKVLRKRVSVTSTRGRKRMSSRASKKPLKKKRRKNGGLRRKVRRDNVGDFIDNGPAIRTKSRRKPGRERRRPLLEDSDSDSDCVPSGSSDYEYTISEEEREQLREAKELCESLRTNLRSSSLLMKNEEVGVHEDLHQQRKPPGRKGKEKIEEPQGRKGKEKVEDLKSEVGKQVCGICLSEENKRKLRGVLDCCTHYFCFACIMEWAKVESRCPLCKQRFKTINKPARSAAGIDLREVVIQVPERDQVYQPSEEELRSYIDPYEYVICSECHQGGDDGLMLLCDICDSPAHTYCVGLGREVPEGNWYCDGCRPVALGSSSSQVQERVADPRVTIQSLPVRPSPVLHVRESIDLNLMSSPHTSFSQGFGHLPSSRFSGRSVEGASPVFGGGAPTLSERRWIHCQIQQLLSIDRMTSTTGRTNGISATSSTSNLYSSQIDQSREAATQHTRTQDLGTSYHTFFEERLCNNSSPLMQNGDLFSTRISNSRRTAVQDSTTFTNRPEHGALWPGLVGTPSTSDYEPVHQFSSRSNIVTDSSLPPAIKEESNFHIVKEQLQSLVKNHLKSLSRDIDLGHSTFKEIARSSTHTILAACGLEHKKSEVCTVPPPSVCPHIELMAGGQTSLIKGCCSSCFDSFVRDVVKRILDTRMSSQWLRLGL*
>comp23340_c0_seq1
ASYKNKALVIIGNLIVIDKKFHRDQESLVGFGTQNGTIRFNKFKFGKHKLSSSTNIELFGSPLTPSKPTHIQVKRQFIWILTLPNT*
>comp37747_c0_seq1
MDPHPPPSTPLLGPAPLGGGFLDSCLWFLCCCGLFNCCFPPLFEPGPPPL*FLLHFSVKPLLFQGFLFVCLTARKLKKIGE
>comp37357_c0_seq1
QPPGFVAQVESSDLVCCLHKALSSLKQSPRAWFGQLSTVV*
>comp227572_c0_seq1
MKQLKLYNHYNDPFAISLLHIFSACYCHGILDNRFFCING
>comp59694_c1_seq13
[truncated: 10,636,431 more chars]
