# Supplementary material for: De Novo Assembly and Characterization of Sophora japonica Transcriptome Using RNA-seq
Source: Biomed Res Int. 2014 Jan 2;2014:750961. doi: 10.1155/2014/750961 (PMC3910276; doi:10.1155/2014/750961)
Supplement: Supplementary file 1 — Additional file1: Information of unigenes expression in S. japonica. Additional file2: DNA sequences of all unigenes in S. japonica. Additional file3: Potential protein coding sequences of all unigenes in S. japonica. Additional file4: Quality score distribution across all bases. Additional file5: Quality score distribution over all sequences. Additional file6: Distribution of unigenes mapped to the speciesshown by pie graph. Additional file7: Detailed information for GO classification of unigenes in S. japonica. Additional file8: COG functional classification list of unigenes in S. japonica. Additional file9: Detailed information for unignenes mapping KEGG pathway in S. japonica. Additional file10: Illustration of the whole network of unigenes in S. japonica. Additional file11: Protein-protein interactions of unigenes in S. japonica. [file 750961.f1.zip › 750961.f1/Additional file/Additional file1. RSEM.genes.txt]

gene_id	transcript_id(s)	length	effective_length	expected_count	TPM	FPKM
comp0_c0	comp0_c0_seq1	1529.00	1433.56	32.00	0.92	0.64
comp100096_c0	comp100096_c0_seq1	1239.00	1143.56	52.00	1.87	1.31
comp100097_c0	comp100097_c0_seq1	531.00	435.60	23.00	2.18	1.52
comp100101_c0	comp100101_c0_seq1	673.00	577.57	49.00	3.49	2.44
comp100166_c0	comp100166_c0_seq1	1249.00	1153.56	81.00	2.89	2.02
comp100198_c0	comp100198_c0_seq1	332.00	236.67	8.00	1.39	0.97
comp100218_c0	comp100218_c0_seq1	444.00	348.62	14.00	1.65	1.15
comp10022_c0	comp10022_c0_seq1	391.00	295.64	3.00	0.42	0.29
comp10029_c0	comp10029_c0_seq1	935.00	839.56	28.00	1.37	0.96
comp100318_c0	comp100318_c0_seq1	350.00	254.66	8.00	1.29	0.90
comp10039_c0	comp10039_c0_seq1	439.00	343.62	12.00	1.44	1.00
comp10045_c0	comp10045_c0_seq1	398.00	302.64	11.00	1.50	1.05
comp10046_c0	comp10046_c0_seq1	817.00	721.56	17.00	0.97	0.68
comp100503_c0	comp100503_c0_seq1	425.00	329.63	6.00	0.75	0.52
comp100511_c0	comp100511_c0_seq1	463.00	367.62	9.00	1.01	0.70
comp10051_c0	comp10051_c0_seq1	305.00	209.69	2.00	0.39	0.27
comp100520_c0	comp100520_c0_seq1	994.00	898.56	35.00	1.60	1.12
comp100527_c0	comp100527_c0_seq1	871.00	775.56	59.00	3.13	2.19
comp100529_c0	comp100529_c0_seq1	393.00	297.64	8.00	1.11	0.77
comp100544_c0	comp100544_c0_seq1	322.00	226.68	9.00	1.64	1.14
comp100579_c0	comp100579_c0_seq1	512.00	416.60	19.00	1.88	1.31
comp10059_c0	comp10059_c0_seq1	954.00	858.56	22.00	1.06	0.74
comp1005_c0	comp1005_c0_seq1	488.00	392.61	11.00	1.15	0.81
comp100610_c0	comp100610_c0_seq1	444.00	348.62	11.00	1.30	0.91
comp10064_c0	comp10064_c0_seq1	368.00	272.65	11.00	1.66	1.16
comp100660_c0	comp100660_c0_seq1	315.00	219.68	8.00	1.50	1.05
comp10073_c0	comp10073_c0_seq1	444.00	348.62	9.00	1.06	0.74
comp1007_c0	comp1007_c0_seq1	692.00	596.57	31.00	2.14	1.49
comp100810_c0	comp100810_c0_seq1	315.00	219.68	2.00	0.38	0.26
comp10082_c0	comp10082_c0_seq1	923.00	827.56	15.00	0.75	0.52
comp100967_c0	comp100967_c0_seq1	325.00	229.68	11.00	1.97	1.38
comp100991_c0	comp100991_c0_seq1	790.00	694.56	39.00	2.31	1.61
comp1009_c0	comp1009_c0_seq1	415.00	319.63	15.00	1.93	1.35
comp1009_c1	comp1009_c1_seq1	320.00	224.68	0.00	0.00	0.00
comp101041_c0	comp101041_c0_seq1	329.00	233.67	18.00	3.17	2.22
comp101051_c0	comp101051_c0_seq1	424.00	328.63	9.00	1.13	0.79
comp10106_c0	comp10106_c0_seq1	723.00	627.57	12.00	0.79	0.55
comp101102_c0	comp101102_c0_seq1	429.00	333.63	7.00	0.86	0.60
comp101133_c0	comp101133_c0_seq1	645.00	549.58	34.00	2.55	1.78
comp1011_c0	comp1011_c0_seq1	633.00	537.58	17.00	1.30	0.91
comp101275_c0	comp101275_c0_seq1	313.00	217.68	15.00	2.84	1.98
comp101276_c0	comp101276_c0_seq1	363.00	267.65	7.00	1.08	0.75
comp101282_c0	comp101282_c0_seq1	735.00	639.57	51.00	3.28	2.29
comp101298_c0	comp101298_c0_seq1	615.00	519.58	45.00	3.57	2.49
comp10129_c0	comp10129_c0_seq1	709.00	613.57	32.00	2.15	1.50
comp101307_c0	comp101307_c0_seq1	398.00	302.64	17.00	2.31	1.62
comp101315_c0	comp101315_c0_seq1	1310.00	1214.56	45.00	1.53	1.06
comp10133_c0	comp10133_c0_seq1	1517.00	1421.56	58.00	1.68	1.17
comp101380_c0	comp101380_c0_seq1	346.00	250.66	17.00	2.80	1.95
comp101407_c0	comp101407_c0_seq1	640.00	544.58	38.00	2.87	2.01
comp10146_c0	comp10146_c0_seq1	909.00	813.56	31.00	1.57	1.10
comp101499_c0	comp101499_c0_seq1	498.00	402.61	27.00	2.76	1.93
comp1014_c0	comp1014_c0_seq1	1210.00	1114.56	61.00	2.25	1.57
comp101510_c0	comp101510_c0_seq1	717.00	621.57	48.00	3.18	2.22
comp101546_c0	comp101546_c0_seq1	311.00	215.68	14.00	2.68	1.87
comp101549_c0	comp101549_c0_seq1	444.00	348.62	6.00	0.71	0.49
comp10154_c0	comp10154_c0_seq1	314.00	218.68	5.00	0.94	0.66
comp101562_c0	comp101562_c0_seq1	394.00	298.64	12.00	1.66	1.16
comp1015_c0	comp1015_c0_seq1	647.00	551.58	20.00	1.49	1.04
comp101625_c0	comp101625_c0_seq1	1095.00	999.56	56.00	2.31	1.61
comp10165_c0	comp10165_c0_seq1	349.00	253.66	4.00	0.65	0.45
comp101674_c0	comp101674_c0_seq1	476.00	380.61	23.00	2.49	1.74
comp101700_c0	comp101700_c0_seq1	527.00	431.60	13.00	1.24	0.87
comp101744_c0	comp101744_c0_seq1	595.00	499.58	30.00	2.47	1.73
comp101749_c0	comp101749_c0_seq1	528.00	432.60	29.00	2.76	1.93
comp10176_c0	comp10176_c0_seq1	834.00	738.56	17.00	0.95	0.66
comp101793_c0	comp101793_c0_seq1	517.00	421.60	32.00	3.13	2.18
comp1017_c0	comp1017_c0_seq1	370.00	274.65	12.00	1.80	1.26
comp101800_c0	comp101800_c0_seq1	378.00	282.65	17.00	2.48	1.73
comp101802_c0	comp101802_c0_seq1	1346.00	1250.56	73.08	2.41	1.68
comp10183_c0	comp10183_c0_seq1	698.00	602.57	16.00	1.09	0.76
comp10184_c0	comp10184_c0_seq1	437.00	341.62	4.00	0.48	0.34
comp101861_c0	comp101861_c0_seq1	343.00	247.66	13.00	2.16	1.51
comp10186_c0	comp10186_c0_seq1	704.00	608.57	15.00	1.02	0.71
comp101881_c0	comp101881_c0_seq1	558.00	462.59	33.00	2.94	2.05
comp101883_c0	comp101883_c0_seq1	315.00	219.68	3.00	0.56	0.39
comp1018_c0	comp1018_c0_seq1	481.00	385.61	21.00	2.24	1.57
comp1018_c1	comp1018_c1_seq1	392.00	296.64	7.00	0.97	0.68
comp10193_c0	comp10193_c0_seq1	371.00	275.65	7.00	1.05	0.73
comp101972_c0	comp101972_c0_seq1	399.00	303.64	18.00	2.44	1.70
comp101991_c0	comp101991_c0_seq1	2430.00	2334.56	109.00	1.92	1.34
comp101995_c0	comp101995_c0_seq1	834.00	738.56	60.00	3.35	2.34
comp1019_c0	comp1019_c0_seq1	1942.00	1846.56	95.00	2.12	1.48
comp1019_c1	comp1019_c1_seq1	662.00	566.57	27.00	1.96	1.37
comp102020_c0	comp102020_c0_seq1	822.00	726.56	36.00	2.04	1.42
comp102052_c0	comp102052_c0_seq1	304.00	208.69	6.00	1.19	0.83
comp102080_c0	comp102080_c0_seq1	534.00	438.60	32.00	3.01	2.10
comp10209_c0	comp10209_c0_seq1	309.00	213.69	4.89	0.94	0.66
comp102118_c0	comp102118_c0_seq1	1769.00	1673.56	58.00	1.43	1.00
comp1021_c0	comp1021_c0_seq1	510.00	414.60	21.00	2.09	1.46
comp102237_c0	comp102237_c0_seq1	308.00	212.69	4.00	0.78	0.54
comp102238_c0	comp102238_c0_seq1	337.00	241.67	13.00	2.22	1.55
comp102240_c0	comp102240_c0_seq1	564.00	468.59	28.00	2.46	1.72
comp10224_c0	comp10224_c0_seq1	1367.00	1271.56	27.00	0.87	0.61
comp1022_c0	comp1022_c0_seq1	383.00	287.65	8.00	1.15	0.80
comp102343_c0	comp102343_c0_seq1	647.00	551.58	21.00	1.57	1.09
comp102378_c0	comp102378_c0_seq1	320.00	224.68	5.00	0.92	0.64
comp102395_c0	comp102395_c0_seq1	352.00	256.66	5.00	0.80	0.56
comp10240_c0	comp10240_c0_seq1	603.00	507.58	17.00	1.38	0.96
comp102431_c0	comp102431_c0_seq1	447.00	351.62	12.00	1.41	0.98
comp102449_c0	comp102449_c0_seq1	479.00	383.61	23.00	2.47	1.72
comp10244_c0	comp10244_c0_seq1	1378.00	1282.56	56.00	1.80	1.25
comp10247_c0	comp10247_c0_seq1	567.00	471.59	9.00	0.79	0.55
comp102543_c0	comp102543_c0_seq1	528.00	432.60	33.00	3.14	2.19
comp102586_c0	comp102586_c0_seq1	1326.00	1230.56	44.00	1.47	1.03
comp102596_c0	comp102596_c0_seq1	500.00	404.60	26.00	2.65	1.85
comp102603_c0	comp102603_c0_seq1	1360.00	1264.56	72.12	2.35	1.64
comp10260_c0	comp10260_c0_seq1	498.00	402.61	2.00	0.20	0.14
comp10261_c0	comp10261_c0_seq1	301.00	205.69	4.00	0.80	0.56
comp102639_c0	comp102639_c0_seq1	479.00	383.61	22.00	2.36	1.65
comp10267_c0	comp10267_c0_seq1	1631.00	1535.56	81.00	2.17	1.52
comp1026_c0	comp1026_c0_seq1	357.00	261.66	6.00	0.95	0.66
comp10271_c0	comp10271_c0_seq1	918.00	822.56	28.33	1.42	0.99
comp10273_c0	comp10273_c0_seq1	311.00	215.68	2.00	0.38	0.27
comp10278_c0	comp10278_c0_seq1	332.00	236.67	3.00	0.52	0.36
comp1027_c0	comp1027_c0_seq1	436.00	340.62	19.00	2.30	1.60
comp10283_c0	comp10283_c0_seq1	814.00	718.56	23.00	1.32	0.92
comp102900_c0	comp102900_c0_seq1	512.00	416.60	8.00	0.79	0.55
comp10290_c0	comp10290_c0_seq1	422.00	326.63	3.00	0.38	0.26
comp102918_c0	comp102918_c0_seq1	567.00	471.59	14.00	1.22	0.85
comp102927_c0	comp102927_c0_seq1	779.00	683.56	44.00	2.65	1.85
comp10298_c0	comp10298_c0_seq1	310.00	214.68	7.00	1.34	0.94
comp1029_c0	comp1029_c0_seq1	710.00	614.57	24.00	1.61	1.12
comp10301_c0	comp10301_c0_seq1	655.00	559.57	11.00	0.81	0.57
comp103032_c0	comp103032_c0_seq1	555.00	459.59	20.00	1.79	1.25
comp10307_c0	comp10307_c0_seq1	1436.00	1340.56	43.00	1.32	0.92
comp103082_c0	comp103082_c0_seq1	304.00	208.69	2.00	0.40	0.28
comp10308_c0	comp10308_c0_seq1	349.00	253.66	9.00	1.46	1.02
comp1030_c0	comp1030_c0_seq1	593.00	497.58	8.00	0.66	0.46
comp10310_c0	comp10310_c0_seq1	460.00	364.62	10.00	1.13	0.79
comp10311_c0	comp10311_c0_seq1	515.00	419.60	5.00	0.49	0.34
comp10313_c0	comp10313_c0_seq1	624.00	528.58	17.00	1.32	0.92
comp103164_c0	comp103164_c0_seq1	342.00	246.67	8.00	1.34	0.93
comp10318_c0	comp10318_c0_seq1	512.00	416.60	8.00	0.79	0.55
comp103197_c0	comp103197_c0_seq1	799.00	703.56	24.00	1.41	0.98
comp10321_c0	comp10321_c0_seq1	677.00	581.57	12.00	0.85	0.59
comp10322_c0	comp10322_c0_seq1	646.00	550.58	21.00	1.57	1.10
comp10323_c0	comp10323_c0_seq1	523.00	427.60	14.00	1.35	0.94
comp103300_c0	comp103300_c0_seq1	361.00	265.66	16.00	2.48	1.73
comp10330_c0	comp10330_c0_seq1	321.00	225.68	6.00	1.10	0.76
comp103373_c0	comp103373_c0_seq1	350.00	254.66	12.00	1.94	1.36
comp103392_c0	comp103392_c0_seq1	651.00	555.58	41.00	3.04	2.12
comp10339_c0	comp10339_c0_seq1	1787.00	1691.56	72.00	1.75	1.22
comp1033_c0	comp1033_c0_seq1,comp1033_c0_seq2	447.00	351.62	5.00	0.59	0.41
comp103400_c0	comp103400_c0_seq1	723.00	627.57	36.00	2.36	1.65
comp103407_c0	comp103407_c0_seq1	1042.00	946.56	71.00	3.09	2.16
comp103410_c0	comp103410_c0_seq1	407.00	311.64	6.00	0.79	0.55
comp103412_c0	comp103412_c0_seq1	359.00	263.66	11.00	1.72	1.20
comp10341_c0	comp10341_c0_seq1	445.00	349.62	7.00	0.82	0.58
comp10343_c0	comp10343_c0_seq1	494.00	398.61	9.00	0.93	0.65
comp10344_c0	comp10344_c0_seq1	441.00	345.62	11.00	1.31	0.92
comp103458_c0	comp103458_c0_seq1	827.00	731.56	40.00	2.25	1.57
comp103463_c0	comp103463_c0_seq1	421.00	325.63	15.00	1.90	1.32
comp10346_c0	comp10346_c0_seq1	315.00	219.68	4.00	0.75	0.52
comp103479_c0	comp103479_c0_seq1	331.00	235.67	2.00	0.35	0.24
comp103482_c0	comp103482_c0_seq1	1055.00	959.56	31.00	1.33	0.93
comp103484_c0	comp103484_c0_seq1	524.00	428.60	22.00	2.11	1.48
comp103491_c0	comp103491_c0_seq1	874.00	778.56	37.00	1.96	1.37
comp1034_c0	comp1034_c0_seq1	1005.00	909.56	44.00	1.99	1.39
comp1034_c1	comp1034_c1_seq1	1838.00	1742.56	79.00	1.87	1.30
comp103502_c0	comp103502_c0_seq1	477.00	381.61	18.00	1.94	1.36
comp103503_c0	comp103503_c0_seq1	360.00	264.66	14.00	2.18	1.52
comp103521_c0	comp103521_c0_seq1	713.00	617.57	33.00	2.20	1.54
comp103554_c0	comp103554_c0_seq1	334.00	238.67	12.00	2.07	1.45
comp103576_c0	comp103576_c0_seq1	354.00	258.66	4.00	0.64	0.44
comp103583_c0	comp103583_c0_seq1	419.00	323.63	11.00	1.40	0.98
comp103587_c0	comp103587_c0_seq1	431.00	335.63	19.00	2.33	1.63
comp103588_c0	comp103588_c0_seq1	613.00	517.58	19.00	1.51	1.06
comp103593_c0	comp103593_c0_seq1	656.00	560.57	28.00	2.06	1.44
comp10359_c0	comp10359_c0_seq1	502.00	406.60	8.00	0.81	0.57
comp10360_c0	comp10360_c0_seq1	363.00	267.65	7.00	1.08	0.75
comp103615_c0	comp103615_c0_seq1	574.00	478.59	30.00	2.58	1.80
comp10361_c0	comp10361_c0_seq1	349.00	253.66	5.00	0.81	0.57
comp10362_c0	comp10362_c0_seq1	347.00	251.66	6.00	0.98	0.69
comp103638_c0	comp103638_c0_seq1	371.00	275.65	4.00	0.60	0.42
comp10365_c0	comp10365_c0_seq1	360.00	264.66	5.00	0.78	0.54
comp103676_c0	comp103676_c0_seq1	490.00	394.61	18.00	1.88	1.31
comp103691_c0	comp103691_c0_seq1	986.00	890.56	55.00	2.54	1.78
comp103700_c0	comp103700_c0_seq1	638.00	542.58	37.00	2.81	1.96
comp103745_c0	comp103745_c0_seq1	457.00	361.62	23.00	2.62	1.83
comp10375_c0	comp10375_c0_seq1	326.00	230.67	8.00	1.43	1.00
comp10382_c0	comp10382_c0_seq1	317.00	221.68	0.00	0.00	0.00
comp103833_c0	comp103833_c0_seq1	353.00	257.66	2.00	0.32	0.22
comp103835_c0	comp103835_c0_seq1	1809.00	1713.56	103.00	2.48	1.73
comp103840_c0	comp103840_c0_seq1	485.00	389.61	18.00	1.90	1.33
comp10387_c0	comp10387_c0_seq1	321.00	225.68	5.00	0.91	0.64
comp1038_c0	comp1038_c0_seq1	620.00	524.58	19.00	1.49	1.04
comp10391_c0	comp10391_c0_seq1	355.00	259.66	8.00	1.27	0.89
comp10394_c0	comp10394_c0_seq1	429.00	333.63	8.00	0.99	0.69
comp103979_c0	comp103979_c0_seq1	439.00	343.62	17.00	2.04	1.42
comp10397_c0	comp10397_c0_seq1	564.00	468.59	11.00	0.97	0.67
comp103988_c0	comp103988_c0_seq1	1360.00	1264.56	93.00	3.03	2.11
comp10399_c0	comp10399_c0_seq1	430.00	334.63	4.00	0.49	0.34
comp103_c0	comp103_c0_seq1	614.00	518.58	14.00	1.11	0.78
comp103_c1	comp103_c1_seq1	306.00	210.69	8.00	1.57	1.09
comp104002_c0	comp104002_c0_seq1	357.00	261.66	9.00	1.42	0.99
comp10401_c0	comp10401_c0_seq1	447.00	351.62	11.00	1.29	0.90
comp10402_c0	comp10402_c0_seq1	1604.00	1508.56	42.00	1.15	0.80
comp104034_c0	comp104034_c0_seq1	689.00	593.57	42.00	2.91	2.03
comp104044_c0	comp104044_c0_seq1	422.00	326.63	21.00	2.65	1.85
comp104060_c0	comp104060_c0_seq1	400.00	304.64	22.00	2.98	2.08
comp10406_c0	comp10406_c0_seq1	760.00	664.56	32.00	1.98	1.38
comp104075_c0	comp104075_c0_seq1	403.00	307.64	17.00	2.28	1.59
comp104119_c0	comp104119_c0_seq1	876.00	780.56	41.00	2.16	1.51
comp104124_c0	comp104124_c0_seq1	436.00	340.62	12.00	1.45	1.01
comp104145_c0	comp104145_c0_seq1	395.00	299.64	9.00	1.24	0.86
comp104182_c0	comp104182_c0_seq1	407.00	311.64	26.00	3.44	2.40
comp1041_c0	comp1041_c0_seq1	680.00	584.57	21.00	1.48	1.03
comp10420_c0	comp10420_c0_seq1	405.00	309.64	5.00	0.67	0.46
comp104213_c0	comp104213_c0_seq1	702.00	606.57	34.00	2.31	1.61
comp10422_c0	comp10422_c0_seq1	333.00	237.67	8.00	1.39	0.97
comp10423_c0	comp10423_c0_seq1	437.00	341.62	9.00	1.09	0.76
comp104247_c0	comp104247_c0_seq1	321.00	225.68	2.00	0.37	0.25
comp10424_c0	comp10424_c0_seq1	361.00	265.66	5.00	0.78	0.54
comp10428_c0	comp10428_c0_seq1	1207.00	1111.56	37.00	1.37	0.96
comp104338_c0	comp104338_c0_seq1	562.00	466.59	43.00	3.80	2.65
comp104351_c0	comp104351_c0_seq1	316.00	220.68	6.00	1.12	0.78
comp104361_c0	comp104361_c0_seq1	778.00	682.56	37.00	2.23	1.56
comp10436_c0	comp10436_c0_seq1,comp10436_c0_seq2	652.00	556.58	15.00	1.11	0.77
comp104399_c0	comp104399_c0_seq1	387.00	291.64	6.00	0.85	0.59
comp10439_c0	comp10439_c0_seq1	645.00	549.58	12.00	0.90	0.63
comp10444_c0	comp10444_c0_seq1	800.00	704.56	22.95	1.34	0.94
comp10445_c0	comp10445_c0_seq1	627.00	531.58	10.00	0.77	0.54
comp10448_c0	comp10448_c0_seq1	790.00	694.56	12.00	0.71	0.50
comp104492_c0	comp104492_c0_seq1	517.00	421.60	20.00	1.95	1.36
comp10450_c0	comp10450_c0_seq1	523.00	427.60	8.00	0.77	0.54
comp104528_c0	comp104528_c0_seq1	774.00	678.56	45.33	2.75	1.92
comp10453_c0	comp10453_c0_seq1,comp10453_c0_seq2	409.00	313.63	9.00	1.18	0.83
comp10454_c0	comp10454_c0_seq1	757.00	661.57	11.00	0.68	0.48
comp10455_c0	comp10455_c0_seq1	595.00	499.58	13.00	1.07	0.75
comp104569_c0	comp104569_c0_seq1	406.00	310.64	24.00	3.18	2.22
comp10458_c0	comp10458_c0_seq1	555.00	459.59	8.00	0.72	0.50
comp1045_c0	comp1045_c0_seq1	866.00	770.56	38.00	2.03	1.42
comp10461_c0	comp10461_c0_seq1	779.00	683.56	19.00	1.14	0.80
comp104664_c0	comp104664_c0_seq1	437.00	341.62	20.00	2.41	1.68
comp1046_c0	comp1046_c0_seq1	424.00	328.63	14.00	1.76	1.23
comp1046_c1	comp1046_c1_seq1	411.00	315.63	11.00	1.44	1.00
comp104708_c0	comp104708_c0_seq1	1335.00	1239.56	60.00	1.99	1.39
comp10470_c0	comp10470_c0_seq1	590.00	494.59	19.00	1.58	1.10
comp10476_c0	comp10476_c0_seq1	402.00	306.64	4.00	0.54	0.38
comp104775_c0	comp104775_c0_seq1	651.00	555.58	12.00	0.89	0.62
comp1047_c0	comp1047_c0_seq1	827.00	731.56	19.00	1.07	0.75
comp1047_c1	comp1047_c1_seq1	302.00	206.69	5.00	1.00	0.70
comp104814_c0	comp104814_c0_seq1	580.00	484.59	28.00	2.38	1.66
comp104830_c0	comp104830_c0_seq1	516.00	420.60	10.00	0.98	0.68
comp10485_c0	comp10485_c0_seq1	489.00	393.61	8.00	0.84	0.58
comp10486_c0	comp10486_c0_seq1	327.00	231.67	6.00	1.07	0.75
comp10489_c0	comp10489_c0_seq1	349.00	253.66	7.00	1.14	0.79
comp10490_c0	comp10490_c0_seq1	1935.00	1839.56	41.00	0.92	0.64
comp104931_c0	comp104931_c0_seq1	438.00	342.62	14.00	1.68	1.18
comp10495_c0	comp10495_c0_seq1	460.00	364.62	4.00	0.45	0.32
comp104968_c0	comp104968_c0_seq1	905.00	809.56	42.00	2.14	1.49
comp10496_c0	comp10496_c0_seq1	842.00	746.56	18.00	0.99	0.69
comp104980_c0	comp104980_c0_seq1	546.00	450.59	6.00	0.55	0.38
comp105007_c0	comp105007_c0_seq1	487.00	391.61	10.00	1.05	0.73
comp105014_c0	comp105014_c0_seq1	549.00	453.59	27.00	2.45	1.71
comp105023_c0	comp105023_c0_seq1	648.00	552.58	23.00	1.71	1.20
comp10508_c0	comp10508_c0_seq1	302.00	206.69	7.00	1.40	0.97
comp1050_c0	comp1050_c0_seq1	543.00	447.59	27.00	2.49	1.73
comp10510_c0	comp10510_c0_seq1	531.00	435.60	14.00	1.32	0.92
comp105132_c0	comp105132_c0_seq1	366.00	270.65	7.00	1.07	0.74
comp105167_c0	comp105167_c0_seq1	499.00	403.61	27.01	2.76	1.92
comp1051_c0	comp1051_c0_seq1	343.00	247.66	12.00	2.00	1.39
comp10520_c0	comp10520_c0_seq1	427.00	331.63	9.00	1.12	0.78
comp10523_c0	comp10523_c0_seq1	344.00	248.66	6.00	0.99	0.69
comp10528_c0	comp10528_c0_seq1	566.00	470.59	18.00	1.58	1.10
comp10529_c0	comp10529_c0_seq1	454.00	358.62	8.00	0.92	0.64
comp10532_c0	comp10532_c0_seq1	1589.00	1493.56	101.00	2.78	1.94
comp105331_c0	comp105331_c0_seq1	362.00	266.65	7.00	1.08	0.76
comp10539_c0	comp10539_c0_seq1	561.00	465.59	8.00	0.71	0.49
comp1053_c0	comp1053_c0_seq1	391.00	295.64	2.00	0.28	0.19
comp1053_c1	comp1053_c1_seq1	352.00	256.66	5.00	0.80	0.56
comp10541_c0	comp10541_c0_seq1,comp10541_c0_seq2	384.89	289.53	7.00	1.00	0.70
comp10542_c0	comp10542_c0_seq1	380.00	284.65	9.00	1.30	0.91
comp10546_c0	comp10546_c0_seq1	324.00	228.68	3.00	0.54	0.38
comp105501_c0	comp105501_c0_seq1	455.00	359.62	16.00	1.83	1.28
comp10550_c0	comp10550_c0_seq1	347.00	251.66	2.00	0.33	0.23
comp10551_c0	comp10551_c0_seq1	311.00	215.68	2.00	0.38	0.27
comp10552_c0	comp10552_c0_seq1	725.00	629.57	13.00	0.85	0.59
comp105544_c0	comp105544_c0_seq1	512.00	416.60	24.00	2.37	1.66
comp10554_c0	comp10554_c0_seq1	358.00	262.66	3.00	0.47	0.33
comp1055_c0	comp1055_c0_seq1,comp1055_c0_seq2	697.25	601.82	23.00	1.57	1.10
comp105604_c0	comp105604_c0_seq1	396.00	300.64	25.00	3.43	2.39
comp105617_c0	comp105617_c0_seq1	661.00	565.57	24.00	1.75	1.22
comp105619_c0	comp105619_c0_seq1	486.00	390.61	30.00	3.16	2.21
comp105624_c0	comp105624_c0_seq1	398.00	302.64	24.00	3.27	2.28
comp10562_c0	comp10562_c0_seq1	528.00	432.60	11.00	1.05	0.73
comp105633_c0	comp105633_c0_seq1	874.00	778.56	21.00	1.11	0.78
comp105664_c0	comp105664_c0_seq1	355.00	259.66	19.00	3.02	2.10
comp105668_c0	comp105668_c0_seq1	306.00	210.69	3.00	0.59	0.41
comp105672_c0	comp105672_c0_seq1	776.00	680.56	35.00	2.12	1.48
comp10568_c0	comp10568_c0_seq1	372.00	276.65	8.00	1.19	0.83
comp105698_c0	comp105698_c0_seq1	564.00	468.59	26.00	2.29	1.60
comp105699_c0	comp105699_c0_seq1	954.00	858.56	41.00	1.97	1.37
comp10570_c0	comp10570_c0_seq1,comp10570_c0_seq2	948.80	853.36	29.00	1.40	0.98
comp105713_c0	comp105713_c0_seq1	501.00	405.60	27.00	2.74	1.91
comp105715_c0	comp105715_c0_seq1	517.00	421.60	29.00	2.83	1.98
comp10571_c0	comp10571_c0_seq1	473.00	377.61	14.00	1.53	1.07
comp105721_c0	comp105721_c0_seq1	882.00	786.56	48.00	2.51	1.75
comp105729_c0	comp105729_c0_seq1	842.00	746.56	30.00	1.66	1.16
comp10572_c0	comp10572_c0_seq1	310.00	214.68	1.00	0.19	0.13
comp10578_c0	comp10578_c0_seq1	533.00	437.60	13.00	1.22	0.85
comp105809_c0	comp105809_c0_seq1	307.00	211.69	10.00	1.95	1.36
comp105815_c0	comp105815_c0_seq1	342.00	246.67	7.00	1.17	0.82
comp10581_c0	comp10581_c0_seq1	522.00	426.60	9.00	0.87	0.61
comp105827_c0	comp105827_c0_seq1	838.00	742.56	36.00	2.00	1.39
comp10582_c0	comp10582_c0_seq1	430.00	334.63	3.00	0.37	0.26
comp105840_c0	comp105840_c0_seq1	393.00	297.64	12.00	1.66	1.16
comp105857_c0	comp105857_c0_seq1	410.00	314.63	23.00	3.01	2.10
comp10589_c0	comp10589_c0_seq1	305.00	209.69	9.00	1.77	1.23
comp105903_c0	comp105903_c0_seq1	859.00	763.56	53.00	2.86	2.00
comp10590_c0	comp10590_c0_seq1	307.00	211.69	4.00	0.78	0.54
comp105916_c0	comp105916_c0_seq1	486.00	390.61	21.00	2.22	1.55
comp105933_c0	comp105933_c0_seq1	845.00	749.56	44.00	2.42	1.69
comp105951_c0	comp105951_c0_seq1	324.00	228.68	6.00	1.08	0.75
comp105973_c0	comp105973_c0_seq1	596.00	500.58	38.00	3.13	2.18
comp10597_c0	comp10597_c0_seq1	615.00	519.58	13.00	1.03	0.72
comp105996_c0	comp105996_c0_seq1	356.00	260.66	10.99	1.74	1.21
comp1059_c0	comp1059_c0_seq1	548.00	452.59	21.00	1.91	1.33
comp105_c0	comp105_c0_seq1,comp105_c0_seq2	687.05	591.62	14.00	0.97	0.68
comp106035_c0	comp106035_c0_seq1	657.00	561.57	24.00	1.76	1.23
comp106058_c0	comp106058_c0_seq1	667.00	571.57	31.00	2.23	1.56
comp10605_c0	comp10605_c0_seq1	443.00	347.62	6.00	0.71	0.50
comp106060_c0	comp106060_c0_seq1	829.00	733.56	43.00	2.41	1.69
comp106084_c0	comp106084_c0_seq1	344.00	248.66	12.00	1.99	1.39
comp1060_c0	comp1060_c0_seq1	819.00	723.56	32.00	1.82	1.27
comp10611_c0	comp10611_c0_seq1	309.00	213.69	2.00	0.39	0.27
comp106131_c0	comp106131_c0_seq1	607.00	511.58	37.00	2.98	2.08
comp10615_c0	comp10615_c0_seq1	328.00	232.67	6.00	1.06	0.74
comp106170_c0	comp106170_c0_seq1	993.00	897.56	42.98	1.97	1.38
comp106187_c0	comp106187_c0_seq1	989.00	893.56	23.00	1.06	0.74
comp1061_c0	comp1061_c0_seq1	351.00	255.66	9.00	1.45	1.01
comp106273_c0	comp106273_c0_seq1	409.00	313.63	25.00	3.28	2.29
comp106312_c0	comp106312_c0_seq1	372.00	276.65	2.00	0.30	0.21
comp106358_c0	comp106358_c0_seq1	438.00	342.62	12.00	1.44	1.01
comp106386_c0	comp106386_c0_seq1	762.00	666.56	32.00	1.98	1.38
comp106393_c0	comp106393_c0_seq1	357.00	261.66	5.00	0.79	0.55
comp10639_c0	comp10639_c0_seq1	352.00	256.66	2.00	0.32	0.22
comp106422_c0	comp106422_c0_seq1	823.00	727.56	32.00	1.81	1.26
comp10648_c0	comp10648_c0_seq1	307.00	211.69	5.00	0.97	0.68
comp106495_c0	comp106495_c0_seq1	628.00	532.58	28.00	2.17	1.51
comp106497_c0	comp106497_c0_seq1	683.00	587.57	31.00	2.17	1.52
comp106549_c0	comp106549_c0_seq1	341.00	245.67	1.00	0.17	0.12
comp106560_c0	comp106560_c0_seq1	546.00	450.59	36.00	3.29	2.30
comp106578_c0	comp106578_c0_seq1	389.00	293.64	10.00	1.40	0.98
comp10657_c0	comp10657_c0_seq1	1053.00	957.56	17.00	0.73	0.51
comp106604_c0	comp106604_c0_seq1	325.00	229.68	12.00	2.15	1.50
comp106636_c0	comp106636_c0_seq1	344.00	248.66	4.00	0.66	0.46
comp106663_c0	comp106663_c0_seq1	3055.00	2959.56	170.00	2.37	1.65
comp1066_c0	comp1066_c0_seq1	336.00	240.67	1.00	0.17	0.12
comp106718_c0	comp106718_c0_seq1	413.00	317.63	18.00	2.34	1.63
comp10671_c0	comp10671_c0_seq1	497.00	401.61	10.00	1.03	0.72
comp106726_c0	comp106726_c0_seq1	468.00	372.61	24.00	2.65	1.85
comp106737_c0	comp106737_c0_seq1	474.00	378.61	19.00	2.07	1.44
comp106778_c0	comp106778_c0_seq1	1008.00	912.56	63.00	2.84	1.98
comp10677_c0	comp10677_c0_seq1	616.00	520.58	7.00	0.55	0.39
comp10679_c0	comp10679_c0_seq1	731.00	635.57	23.00	1.49	1.04
comp1067_c0	comp1067_c0_seq1	609.00	513.58	12.00	0.96	0.67
comp106801_c0	comp106801_c0_seq1	1261.00	1165.56	73.00	2.58	1.80
comp106813_c0	comp106813_c0_seq1	493.00	397.61	13.00	1.35	0.94
comp10681_c0	comp10681_c0_seq1	307.00	211.69	1.00	0.19	0.14
comp1068_c0	comp1068_c0_seq1	749.00	653.57	32.00	2.02	1.41
comp10690_c0	comp10690_c0_seq1	516.00	420.60	8.00	0.78	0.55
comp106920_c0	comp106920_c0_seq1	551.00	455.59	23.00	2.08	1.45
comp10697_c0	comp10697_c0_seq1	500.00	404.60	11.00	1.12	0.78
comp1069_c0	comp1069_c0_seq1	379.00	283.65	19.00	2.76	1.93
comp107063_c0	comp107063_c0_seq1	720.00	624.57	31.00	2.04	1.43
comp107073_c0	comp107073_c0_seq1	377.00	281.65	4.00	0.59	0.41
comp1070_c0	comp1070_c0_seq1	345.00	249.66	10.00	1.65	1.15
comp107124_c0	comp107124_c0_seq1	409.00	313.63	2.00	0.26	0.18
comp107130_c0	comp107130_c0_seq1	355.00	259.66	10.00	1.59	1.11
comp107169_c0	comp107169_c0_seq1	1374.00	1278.56	59.00	1.90	1.33
comp10718_c0	comp10718_c0_seq1	465.00	369.61	12.00	1.34	0.93
comp10726_c0	comp10726_c0_seq1	302.00	206.69	2.00	0.40	0.28
comp107312_c0	comp107312_c0_seq1	367.00	271.65	18.00	2.73	1.91
comp107349_c0	comp107349_c0_seq1	327.00	231.67	4.00	0.71	0.50
comp10735_c0	comp10735_c0_seq1	335.00	239.67	5.00	0.86	0.60
comp107387_c0	comp107387_c0_seq1	467.00	371.61	22.00	2.44	1.70
comp107391_c0	comp107391_c0_seq1	459.00	363.62	15.00	1.70	1.19
comp1073_c0	comp1073_c0_seq1	396.00	300.64	27.00	3.70	2.58
comp10746_c0	comp10746_c0_seq1	559.00	463.59	22.00	1.96	1.36
comp10749_c0	comp10749_c0_seq1	375.00	279.65	3.00	0.44	0.31
comp107545_c0	comp107545_c0_seq1	324.00	228.68	15.00	2.70	1.89
comp10763_c0	comp10763_c0_seq1	352.00	256.66	2.00	0.32	0.22
comp10764_c0	comp10764_c0_seq1	616.00	520.58	12.00	0.95	0.66
comp107706_c0	comp107706_c0_seq1	496.00	400.61	27.00	2.78	1.94
comp107794_c0	comp107794_c0_seq1	534.00	438.60	12.00	1.13	0.79
comp1077_c0	comp1077_c0_seq1,comp1077_c0_seq2	809.70	714.26	46.00	2.65	1.85
comp10781_c0	comp10781_c0_seq1	306.00	210.69	4.00	0.78	0.55
comp107828_c0	comp107828_c0_seq1	413.00	317.63	10.00	1.30	0.91
comp10789_c0	comp10789_c0_seq1	307.00	211.69	3.00	0.58	0.41
comp1078_c0	comp1078_c0_seq1	584.00	488.59	32.00	2.70	1.88
comp107992_c0	comp107992_c0_seq1	638.00	542.58	28.00	2.13	1.48
comp107998_c0	comp107998_c0_seq1	305.00	209.69	0.00	0.00	0.00
comp1079_c0	comp1079_c0_seq1	1389.00	1293.56	61.00	1.94	1.36
comp107_c0	comp107_c0_seq1	308.00	212.69	5.00	0.97	0.68
comp108034_c0	comp108034_c0_seq1	683.00	587.57	16.00	1.12	0.78
comp10805_c0	comp10805_c0_seq1	540.00	444.60	10.00	0.93	0.65
comp108130_c0	comp108130_c0_seq1	330.00	234.67	6.00	1.05	0.74
comp10814_c0	comp10814_c0_seq1	322.00	226.68	3.00	0.55	0.38
comp108153_c0	comp108153_c0_seq1	1336.00	1240.56	65.00	2.16	1.51
comp10816_c0	comp10816_c0_seq1	388.00	292.64	1.00	0.14	0.10
comp10817_c0	comp10817_c0_seq1	434.00	338.63	7.00	0.85	0.59
comp1081_c0	comp1081_c0_seq1	467.00	371.61	16.00	1.77	1.24
comp108214_c0	comp108214_c0_seq1	375.00	279.65	16.00	2.36	1.65
comp108217_c0	comp108217_c0_seq1	348.00	252.66	7.00	1.14	0.80
comp108219_c0	comp108219_c0_seq1	310.00	214.68	15.00	2.88	2.01
comp108222_c0	comp108222_c0_seq1	463.00	367.62	17.00	1.91	1.33
comp108235_c0	comp108235_c0_seq1	660.00	564.57	34.00	2.48	1.73
comp108239_c0	comp108239_c0_seq1	2132.00	2036.56	95.00	1.92	1.34
comp108252_c0	comp108252_c0_seq1	1404.00	1308.56	42.00	1.32	0.92
comp108307_c0	comp108307_c0_seq1	554.00	458.59	17.00	1.53	1.07
comp108319_c0	comp108319_c0_seq1	350.00	254.66	11.00	1.78	1.24
comp10831_c0	comp10831_c0_seq1	451.00	355.62	3.00	0.35	0.24
comp108330_c0	comp108330_c0_seq1	451.00	355.62	22.00	2.55	1.78
comp108355_c0	comp108355_c0_seq1	354.00	258.66	8.00	1.27	0.89
comp108356_c0	comp108356_c0_seq1	393.00	297.64	14.00	1.94	1.35
comp108369_c0	comp108369_c0_seq1	928.00	832.56	39.00	1.93	1.35
comp10837_c0	comp10837_c0_seq1	1165.00	1069.56	24.00	0.92	0.64
comp108382_c0	comp108382_c0_seq1	401.00	305.64	22.00	2.97	2.07
comp108394_c0	comp108394_c0_seq1	305.00	209.69	6.00	1.18	0.82
comp108402_c0	comp108402_c0_seq1	541.00	445.59	27.00	2.50	1.74
comp108405_c0	comp108405_c0_seq1	339.00	243.67	9.00	1.52	1.06
comp108426_c0	comp108426_c0_seq1	1159.00	1063.56	52.00	2.01	1.41
comp108434_c0	comp108434_c0_seq1	701.00	605.57	40.00	2.72	1.90
comp108437_c0	comp108437_c0_seq1	337.00	241.67	7.00	1.19	0.83
comp108467_c0	comp108467_c0_seq1	615.00	519.58	31.00	2.46	1.72
comp108469_c0	comp108469_c0_seq1	460.00	364.62	11.00	1.24	0.87
comp10849_c0	comp10849_c0_seq1	523.00	427.60	13.00	1.25	0.87
comp108518_c0	comp108518_c0_seq1	964.00	868.56	49.00	2.32	1.62
comp108558_c0	comp108558_c0_seq1	336.00	240.67	3.00	0.51	0.36
comp108577_c0	comp108577_c0_seq1	613.00	517.58	30.00	2.39	1.67
comp108593_c0	comp108593_c0_seq1	454.00	358.62	20.00	2.30	1.60
comp108603_c0	comp108603_c0_seq1	312.00	216.68	9.00	1.71	1.19
comp108622_c0	comp108622_c0_seq1	922.00	826.56	44.00	2.19	1.53
comp108629_c0	comp108629_c0_seq1	363.00	267.65	19.00	2.93	2.04
comp108630_c0	comp108630_c0_seq1	565.00	469.59	9.00	0.79	0.55
comp108706_c0	comp108706_c0_seq1	425.00	329.63	3.00	0.38	0.26
comp108780_c0	comp108780_c0_seq1	1202.00	1106.56	46.00	1.71	1.19
comp108807_c0	comp108807_c0_seq1	430.00	334.63	23.00	2.83	1.98
comp10885_c0	comp10885_c0_seq1	656.00	560.57	11.00	0.81	0.56
comp108921_c0	comp108921_c0_seq1	447.00	351.62	15.00	1.76	1.23
comp108924_c0	comp108924_c0_seq1	437.00	341.62	18.40	2.22	1.55
comp108947_c0	comp108947_c0_seq1	539.00	443.60	14.00	1.30	0.91
comp108972_c0	comp108972_c0_seq1	326.00	230.67	3.00	0.54	0.37
comp10897_c0	comp10897_c0_seq1	590.00	494.59	9.00	0.75	0.52
comp10899_c0	comp10899_c0_seq1	333.00	237.67	5.00	0.87	0.61
comp109038_c0	comp109038_c0_seq1	514.00	418.60	9.00	0.89	0.62
comp109072_c0	comp109072_c0_seq1	406.00	310.64	15.00	1.99	1.39
comp10907_c0	comp10907_c0_seq1	1251.00	1155.56	33.00	1.18	0.82
comp10909_c0	comp10909_c0_seq1	400.00	304.64	10.00	1.35	0.94
comp109110_c0	comp109110_c0_seq1	506.00	410.60	11.00	1.10	0.77
comp109121_c0	comp109121_c0_seq1	353.00	257.66	18.00	2.88	2.01
comp109150_c0	comp109150_c0_seq1	396.00	300.64	11.00	1.51	1.05
comp10916_c0	comp10916_c0_seq1	383.00	287.65	6.00	0.86	0.60
comp109192_c0	comp109192_c0_seq1	332.00	236.67	8.00	1.39	0.97
comp109202_c0	comp109202_c0_seq1	389.00	293.64	7.00	0.98	0.69
comp109204_c0	comp109204_c0_seq1	776.00	680.56	41.00	2.48	1.73
comp109277_c0	comp109277_c0_seq1	686.00	590.57	13.00	0.91	0.63
comp109294_c0	comp109294_c0_seq1	579.00	483.59	31.00	2.64	1.84
comp10931_c0	comp10931_c0_seq1	1574.00	1478.56	39.00	1.09	0.76
comp1093_c0	comp1093_c0_seq1	343.00	247.66	8.00	1.33	0.93
comp109465_c0	comp109465_c0_seq1	393.00	297.64	9.00	1.25	0.87
comp1094_c0	comp1094_c0_seq1	490.00	394.61	33.00	3.45	2.40
comp109500_c0	comp109500_c0_seq1	344.00	248.66	21.00	3.48	2.43
comp10950_c0	comp10950_c0_seq1	324.00	228.68	4.00	0.72	0.50
comp109523_c0	comp109523_c0_seq1	771.00	675.56	47.00	2.87	2.00
comp109524_c0	comp109524_c0_seq1	815.00	719.56	15.00	0.86	0.60
comp10958_c0	comp10958_c0_seq1	379.00	283.65	6.00	0.87	0.61
comp10960_c0	comp10960_c0_seq1	792.00	696.56	11.00	0.65	0.45
comp10969_c0	comp10969_c0_seq1	857.00	761.56	28.00	1.51	1.06
comp10972_c0	comp10972_c0_seq1	524.00	428.60	10.00	0.96	0.67
comp109730_c0	comp109730_c0_seq1	1278.00	1182.56	66.00	2.30	1.60
comp10973_c0	comp10973_c0_seq1	487.00	391.61	6.00	0.63	0.44
comp109770_c0	comp109770_c0_seq1	769.00	673.56	9.00	0.55	0.38
comp10980_c0	comp10980_c0_seq1	489.00	393.61	9.00	0.94	0.66
comp109835_c0	comp109835_c0_seq1	941.00	845.56	17.00	0.83	0.58
comp109869_c0	comp109869_c0_seq1	329.00	233.67	2.00	0.35	0.25
comp109892_c0	comp109892_c0_seq1	1076.00	980.56	60.00	2.52	1.76
comp1098_c0	comp1098_c0_seq1	337.00	241.67	12.00	2.05	1.43
comp109923_c0	comp109923_c0_seq1	308.00	212.69	6.00	1.16	0.81
comp109939_c0	comp109939_c0_seq1	389.00	293.64	6.00	0.84	0.59
comp10996_c0	comp10996_c0_seq1	497.00	401.61	9.00	0.92	0.64
comp1099_c0	comp1099_c0_seq1	440.00	344.62	12.00	1.43	1.00
comp10_c0	comp10_c0_seq1	574.00	478.59	10.00	0.86	0.60
comp11002_c0	comp11002_c0_seq1	753.00	657.57	13.31	0.83	0.58
comp11004_c0	comp11004_c0_seq1	1190.00	1094.56	17.00	0.64	0.45
comp110055_c0	comp110055_c0_seq1	516.00	420.60	8.00	0.78	0.55
comp11006_c0	comp11006_c0_seq1	466.00	370.61	12.00	1.33	0.93
comp110076_c0	comp110076_c0_seq1	522.00	426.60	22.00	2.12	1.48
comp11018_c0	comp11018_c0_seq1	616.00	520.58	10.00	0.79	0.55
comp110199_c0	comp110199_c0_seq1	506.00	410.60	13.11	1.32	0.92
comp1101_c0	comp1101_c0_seq1	360.00	264.66	18.00	2.80	1.96
comp110252_c0	comp110252_c0_seq1	459.00	363.62	15.00	1.70	1.19
comp110274_c0	comp110274_c0_seq1	619.00	523.58	27.00	2.12	1.48
comp110282_c0	comp110282_c0_seq1	371.00	275.65	7.00	1.05	0.73
comp110283_c0	comp110283_c0_seq1	502.00	406.60	22.00	2.23	1.56
comp110285_c0	comp110285_c0_seq1	645.00	549.58	26.00	1.95	1.36
comp11030_c0	comp11030_c0_seq1	411.00	315.63	9.00	1.17	0.82
comp110323_c0	comp110323_c0_seq1	572.00	476.59	26.00	2.25	1.57
comp110349_c0	comp110349_c0_seq1	978.00	882.56	36.00	1.68	1.17
comp11036_c0	comp11036_c0_seq1	347.00	251.66	7.00	1.15	0.80
comp110370_c0	comp110370_c0_seq1	308.00	212.69	4.00	0.78	0.54
comp110384_c0	comp110384_c0_seq1	325.00	229.68	3.00	0.54	0.38
comp110411_c0	comp110411_c0_seq1	548.00	452.59	11.00	1.00	0.70
comp110413_c0	comp110413_c0_seq1	370.00	274.65	19.00	2.85	1.99
comp11041_c0	comp11041_c0_seq1	770.00	674.56	25.87	1.58	1.10
comp11042_c0	comp11042_c0_seq1,comp11042_c0_seq2	473.00	377.61	9.00	0.98	0.69
comp11045_c0	comp11045_c0_seq1	665.00	569.57	15.00	1.08	0.76
comp1104_c0	comp1104_c0_seq1	495.00	399.61	20.00	2.06	1.44
comp110569_c0	comp110569_c0_seq1	456.00	360.62	13.00	1.49	1.04
comp11056_c0	comp11056_c0_seq1	548.00	452.59	11.00	1.00	0.70
comp11057_c0	comp11057_c0_seq1	328.00	232.67	5.00	0.89	0.62
comp110597_c0	comp110597_c0_seq1	602.00	506.58	34.00	2.76	1.93
comp11059_c0	comp11059_c0_seq1	1933.00	1837.56	55.00	1.23	0.86
comp110604_c0	comp110604_c0_seq1	427.00	331.63	18.00	2.24	1.56
comp110610_c0	comp110610_c0_seq1	361.00	265.66	17.00	2.64	1.84
comp11062_c0	comp11062_c0_seq1	1201.00	1105.56	24.00	0.89	0.62
comp11066_c0	comp11066_c0_seq1	471.00	375.61	10.00	1.10	0.77
comp11067_c0	comp11067_c0_seq1	395.00	299.64	9.00	1.24	0.86
comp11070_c0	comp11070_c0_seq1	310.00	214.68	7.00	1.34	0.94
comp110713_c0	comp110713_c0_seq1	936.00	840.56	46.00	2.25	1.57
comp11072_c0	comp11072_c0_seq1	316.00	220.68	2.00	0.37	0.26
comp11073_c0	comp11073_c0_seq1	317.00	221.68	2.00	0.37	0.26
comp11074_c0	comp11074_c0_seq1	308.00	212.69	10.00	1.94	1.35
comp11075_c0	comp11075_c0_seq1	366.00	270.65	6.00	0.91	0.64
comp11077_c0	comp11077_c0_seq1	455.00	359.62	6.00	0.69	0.48
comp1107_c0	comp1107_c0_seq1	477.00	381.61	17.00	1.84	1.28
comp110806_c0	comp110806_c0_seq1	485.00	389.61	4.00	0.42	0.30
comp11080_c0	comp11080_c0_seq1	624.00	528.58	21.00	1.64	1.14
comp11081_c0	comp11081_c0_seq1	321.00	225.68	4.00	0.73	0.51
comp110867_c0	comp110867_c0_seq1	369.00	273.65	5.00	0.75	0.53
comp11087_c0	comp11087_c0_seq1	801.00	705.56	21.00	1.23	0.86
comp11088_c0	comp11088_c0_seq1	408.00	312.63	2.00	0.26	0.18
comp11092_c0	comp11092_c0_seq1,comp11092_c0_seq2	389.00	293.64	10.00	1.40	0.98
comp110944_c0	comp110944_c0_seq1	542.00	446.59	10.00	0.92	0.64
comp110949_c0	comp110949_c0_seq1	586.00	490.59	13.00	1.09	0.76
comp110996_c0	comp110996_c0_seq1	550.00	454.59	32.00	2.90	2.02
comp1109_c0	comp1109_c0_seq1	396.00	300.64	6.00	0.82	0.57
comp110_c0	comp110_c0_seq1	1264.00	1168.56	28.00	0.99	0.69
comp110_c1	comp110_c1_seq1	1052.00	956.56	30.00	1.29	0.90
comp111011_c0	comp111011_c0_seq1	530.00	434.60	22.00	2.09	1.46
comp111029_c0	comp111029_c0_seq1	525.00	429.60	17.00	1.63	1.14
comp11102_c0	comp11102_c0_seq1	493.00	397.61	12.00	1.24	0.87
comp111030_c0	comp111030_c0_seq1	407.00	311.64	13.00	1.72	1.20
comp111038_c0	comp111038_c0_seq1	1139.00	1043.56	53.00	2.09	1.46
comp11104_c0	comp11104_c0_seq1	357.00	261.66	11.00	1.73	1.21
comp111055_c0	comp111055_c0_seq1	918.00	822.56	36.00	1.80	1.26
comp11105_c0	comp11105_c0_seq1	320.00	224.68	4.00	0.73	0.51
comp111066_c0	comp111066_c0_seq1	500.00	404.60	21.00	2.14	1.49
comp111076_c0	comp111076_c0_seq1	555.00	459.59	24.00	2.15	1.50
comp11107_c0	comp11107_c0_seq1	420.00	324.63	8.00	1.02	0.71
comp111083_c0	comp111083_c0_seq1	463.00	367.62	18.00	2.02	1.41
comp11108_c0	comp11108_c0_seq1	751.00	655.57	26.00	1.63	1.14
comp1110_c0	comp1110_c0_seq1	492.00	396.61	15.00	1.56	1.09
comp111112_c0	comp111112_c0_seq1	358.00	262.66	4.00	0.63	0.44
comp111122_c0	comp111122_c0_seq1	372.00	276.65	18.00	2.68	1.87
comp111129_c0	comp111129_c0_seq1	390.00	294.64	7.00	0.98	0.68
comp11112_c0	comp11112_c0_seq1	403.00	307.64	10.00	1.34	0.93
comp111132_c0	comp111132_c0_seq1	368.00	272.65	5.00	0.76	0.53
comp111170_c0	comp111170_c0_seq1	1174.00	1078.56	53.00	2.02	1.41
comp111186_c0	comp111186_c0_seq1	863.00	767.56	34.00	1.82	1.27
comp111204_c0	comp111204_c0_seq1	736.00	640.57	33.13	2.13	1.49
comp111229_c0	comp111229_c0_seq1	799.00	703.56	27.52	1.61	1.12
comp11122_c0	comp11122_c0_seq1	306.00	210.69	8.72	1.71	1.19
comp11123_c0	comp11123_c0_seq1	360.00	264.66	6.00	0.93	0.65
comp111264_c0	comp111264_c0_seq1	458.00	362.62	11.00	1.25	0.87
comp111266_c0	comp111266_c0_seq1	396.00	300.64	18.98	2.60	1.82
comp11126_c0	comp11126_c0_seq1	409.00	313.63	9.00	1.18	0.83
comp111271_c0	comp111271_c0_seq1	362.00	266.65	4.00	0.62	0.43
comp11127_c0	comp11127_c0_seq1	509.00	413.60	18.00	1.79	1.25
comp11128_c0	comp11128_c0_seq1	1761.00	1665.56	54.00	1.34	0.93
comp1112_c0	comp1112_c0_seq1,comp1112_c0_seq2	568.06	472.65	33.00	2.88	2.01
comp111304_c0	comp111304_c0_seq1	1618.00	1522.56	69.00	1.87	1.30
comp11131_c0	comp11131_c0_seq1	611.00	515.58	16.00	1.28	0.89
comp111320_c0	comp111320_c0_seq1	580.00	484.59	26.00	2.21	1.54
comp111322_c0	comp111322_c0_seq1	446.00	350.62	10.00	1.18	0.82
comp111345_c0	comp111345_c0_seq1	721.00	625.57	26.00	1.71	1.19
comp111392_c0	comp111392_c0_seq1	754.00	658.57	41.00	2.56	1.79
comp11139_c0	comp11139_c0_seq1	381.00	285.65	6.00	0.87	0.60
comp111411_c0	comp111411_c0_seq1	496.00	400.61	16.00	1.65	1.15
comp111413_c0	comp111413_c0_seq1	376.00	280.65	12.93	1.90	1.33
comp111446_c0	comp111446_c0_seq1	314.00	218.68	9.00	1.70	1.18
comp11145_c0	comp11145_c0_seq1	519.00	423.60	4.00	0.39	0.27
comp111492_c0	comp111492_c0_seq1	855.00	759.56	37.00	2.01	1.40
comp1114_c0	comp1114_c0_seq1	307.00	211.69	7.00	1.36	0.95
comp111504_c0	comp111504_c0_seq1	497.00	401.61	24.00	2.46	1.72
comp111516_c0	comp111516_c0_seq1	902.00	806.56	40.00	2.04	1.43
comp111554_c0	comp111554_c0_seq1	842.00	746.56	40.00	2.21	1.54
comp111559_c0	comp111559_c0_seq1	316.00	220.68	4.00	0.75	0.52
comp111573_c0	comp111573_c0_seq1	759.00	663.56	33.00	2.05	1.43
comp11157_c0	comp11157_c0_seq1	410.00	314.63	3.00	0.39	0.27
comp111583_c0	comp111583_c0_seq1	323.00	227.68	4.00	0.72	0.51
comp1115_c0	comp1115_c0_seq1	379.00	283.65	16.00	2.32	1.62
comp111600_c0	comp111600_c0_seq1	967.00	871.56	39.00	1.84	1.29
comp111629_c0	comp111629_c0_seq1	433.00	337.63	19.00	2.32	1.62
comp111646_c0	comp111646_c0_seq1	356.00	260.66	10.00	1.58	1.10
comp111683_c0	comp111683_c0_seq1	358.00	262.66	7.00	1.10	0.77
comp111693_c0	comp111693_c0_seq1	358.00	262.66	4.00	0.63	0.44
comp111725_c0	comp111725_c0_seq1	725.00	629.57	32.00	2.09	1.46
comp111749_c0	comp111749_c0_seq1	589.00	493.59	20.00	1.67	1.17
comp111766_c0	comp111766_c0_seq1	1042.00	946.56	41.00	1.78	1.25
comp111786_c0	comp111786_c0_seq1	345.00	249.66	12.00	1.98	1.38
comp111803_c0	comp111803_c0_seq1	327.00	231.67	3.00	0.53	0.37
comp111804_c0	comp111804_c0_seq1	823.00	727.56	51.00	2.89	2.02
comp111832_c0	comp111832_c0_seq1	509.00	413.60	28.00	2.79	1.95
comp11184_c0	comp11184_c0_seq1	480.00	384.61	9.00	0.96	0.67
comp11186_c0	comp11186_c0_seq1	341.00	245.67	5.00	0.84	0.59
comp111893_c0	comp111893_c0_seq1	309.00	213.69	6.00	1.16	0.81
comp111901_c0	comp111901_c0_seq1	342.00	246.67	9.00	1.50	1.05
comp111910_c0	comp111910_c0_seq1	447.00	351.62	5.00	0.59	0.41
comp11195_c0	comp11195_c0_seq1	379.00	283.65	8.00	1.16	0.81
comp111964_c0	comp111964_c0_seq1	427.00	331.63	20.00	2.49	1.73
comp11196_c0	comp11196_c0_seq1	629.00	533.58	12.00	0.93	0.65
comp111972_c0	comp111972_c0_seq1	574.00	478.59	22.00	1.89	1.32
comp11198_c0	comp11198_c0_seq1	843.00	747.56	13.00	0.72	0.50
comp11201_c0	comp11201_c0_seq1	379.00	283.65	4.00	0.58	0.41
comp112045_c0	comp112045_c0_seq1	408.00	312.63	22.00	2.90	2.02
comp11204_c0	comp11204_c0_seq1	724.00	628.57	15.00	0.98	0.69
comp112064_c0	comp112064_c0_seq1	638.00	542.58	25.00	1.90	1.32
comp112068_c0	comp112068_c0_seq1	355.00	259.66	8.00	1.27	0.89
comp112079_c0	comp112079_c0_seq1	311.00	215.68	2.00	0.38	0.27
comp112152_c0	comp112152_c0_seq1	544.00	448.59	12.00	1.10	0.77
comp112159_c0	comp112159_c0_seq1	539.00	443.60	17.00	1.58	1.10
comp11216_c0	comp11216_c0_seq1	508.00	412.60	7.00	0.70	0.49
comp1121_c0	comp1121_c0_seq1	455.00	359.62	20.00	2.29	1.60
comp112212_c0	comp112212_c0_seq1	397.00	301.64	22.00	3.01	2.10
comp112221_c0	comp112221_c0_seq1	567.00	471.59	13.00	1.14	0.79
comp112222_c0	comp112222_c0_seq1	318.00	222.68	6.00	1.11	0.78
comp11226_c0	comp11226_c0_seq1	389.00	293.64	5.00	0.70	0.49
comp112277_c0	comp112277_c0_seq1	1014.00	918.56	57.00	2.56	1.78
comp11227_c0	comp11227_c0_seq1	344.00	248.66	5.00	0.83	0.58
comp1122_c0	comp1122_c0_seq1	318.00	222.68	9.00	1.67	1.16
comp112409_c0	comp112409_c0_seq1	468.00	372.61	14.00	1.55	1.08
comp112411_c0	comp112411_c0_seq1	587.00	491.59	24.00	2.01	1.40
comp11245_c0	comp11245_c0_seq1	313.00	217.68	4.00	0.76	0.53
comp112466_c0	comp112466_c0_seq1	333.00	237.67	5.00	0.87	0.61
comp112478_c0	comp112478_c0_seq1	692.00	596.57	24.00	1.66	1.16
comp11247_c0	comp11247_c0_seq1	527.00	431.60	11.00	1.05	0.73
comp112480_c0	comp112480_c0_seq1	1055.00	959.56	34.00	1.46	1.02
comp112494_c0	comp112494_c0_seq1	308.00	212.69	10.00	1.94	1.35
comp1124_c0	comp1124_c0_seq1	671.00	575.57	32.00	2.29	1.60
comp112566_c0	comp112566_c0_seq1	2641.00	2545.56	153.00	2.47	1.73
comp11264_c0	comp11264_c0_seq1	812.00	716.56	17.00	0.98	0.68
comp11265_c0	comp11265_c0_seq1	338.00	242.67	3.00	0.51	0.36
comp112666_c0	comp112666_c0_seq1	347.00	251.66	3.00	0.49	0.34
comp112678_c0	comp112678_c0_seq1	498.00	402.61	14.00	1.43	1.00
comp112702_c0	comp112702_c0_seq1	353.00	257.66	7.00	1.12	0.78
comp112708_c0	comp112708_c0_seq1	326.00	230.67	7.00	1.25	0.87
comp112720_c0	comp112720_c0_seq1	608.00	512.58	25.00	2.01	1.40
comp112843_c0	comp112843_c0_seq1	438.00	342.62	18.00	2.16	1.51
comp11285_c0	comp11285_c0_seq1	687.00	591.57	22.00	1.53	1.07
comp112861_c0	comp112861_c0_seq1	378.00	282.65	12.00	1.75	1.22
comp112863_c0	comp112863_c0_seq1	642.00	546.58	13.00	0.98	0.68
comp112893_c0	comp112893_c0_seq1	404.00	308.64	9.00	1.20	0.84
comp112900_c0	comp112900_c0_seq1	307.00	211.69	3.00	0.58	0.41
comp11290_c0	comp11290_c0_seq1	585.00	489.59	17.00	1.43	1.00
comp11291_c0	comp11291_c0_seq1,comp11291_c0_seq2	738.85	643.41	16.00	1.02	0.71
comp112943_c0	comp112943_c0_seq1	1092.00	996.56	37.00	1.53	1.07
comp11294_c0	comp11294_c0_seq1	678.00	582.57	15.00	1.06	0.74
comp112967_c0	comp112967_c0_seq1	908.00	812.56	52.00	2.64	1.84
comp1129_c0	comp1129_c0_seq1	335.00	239.67	4.00	0.69	0.48
comp112_c0	comp112_c0_seq1	726.00	630.57	19.00	1.24	0.87
comp113004_c0	comp113004_c0_seq1	624.00	528.58	33.00	2.57	1.79
comp113053_c0	comp113053_c0_seq1	683.00	587.57	28.00	1.96	1.37
comp11306_c0	comp11306_c0_seq1	398.00	302.64	0.00	0.00	0.00
comp113072_c0	comp113072_c0_seq1	452.00	356.62	13.00	1.50	1.05
comp11309_c0	comp11309_c0_seq1	349.00	253.66	2.00	0.32	0.23
comp1130_c0	comp1130_c0_seq1	493.00	397.61	14.00	1.45	1.01
comp113116_c0	comp113116_c0_seq1	332.00	236.67	7.00	1.22	0.85
comp11321_c0	comp11321_c0_seq1	680.00	584.57	11.00	0.78	0.54
comp113233_c0	comp113233_c0_seq1	1046.00	950.56	37.00	1.60	1.12
comp113279_c0	comp113279_c0_seq1	389.00	293.64	20.00	2.81	1.96
comp11329_c0	comp11329_c0_seq1	1664.00	1568.56	28.00	0.74	0.51
comp113318_c0	comp113318_c0_seq1	860.00	764.56	30.00	1.62	1.13
comp1133_c0	comp1133_c0_seq1	439.00	343.62	14.00	1.68	1.17
comp11341_c0	comp11341_c0_seq1	392.00	296.64	3.00	0.42	0.29
comp11345_c0	comp11345_c0_seq1,comp11345_c0_seq2	658.91	563.49	17.00	1.24	0.87
comp11347_c0	comp11347_c0_seq1	816.00	720.56	8.00	0.46	0.32
comp11348_c0	comp11348_c0_seq1	656.00	560.57	12.00	0.88	0.62
comp11351_c0	comp11351_c0_seq1	480.00	384.61	3.00	0.32	0.22
comp113529_c0	comp113529_c0_seq1	667.00	571.57	29.00	2.09	1.46
comp113536_c0	comp113536_c0_seq1	450.00	354.62	16.00	1.86	1.30
comp113568_c0	comp113568_c0_seq1	781.00	685.56	32.00	1.92	1.34
comp113569_c0	comp113569_c0_seq1	609.00	513.58	15.00	1.20	0.84
comp113592_c0	comp113592_c0_seq1	751.00	655.57	39.00	2.45	1.71
comp113630_c0	comp113630_c0_seq1	527.00	431.60	13.00	1.24	0.87
comp113675_c0	comp113675_c0_seq1	527.00	431.60	18.00	1.72	1.20
comp113735_c0	comp113735_c0_seq1	569.00	473.59	9.00	0.78	0.55
comp113816_c0	comp113816_c0_seq1	975.00	879.56	42.00	1.97	1.37
comp113858_c0	comp113858_c0_seq1	481.00	385.61	22.00	2.35	1.64
comp11386_c0	comp11386_c0_seq1	1140.00	1044.56	24.00	0.95	0.66
comp1138_c0	comp1138_c0_seq1	556.00	460.59	33.00	2.95	2.06
comp1138_c1	comp1138_c1_seq1	455.00	359.62	9.00	1.03	0.72
comp113914_c0	comp113914_c0_seq1	533.00	437.60	17.00	1.60	1.12
comp113930_c0	comp113930_c0_seq1	445.00	349.62	12.00	1.41	0.99
comp113931_c0	comp113931_c0_seq1	427.00	331.63	12.00	1.49	1.04
comp11393_c0	comp11393_c0_seq1	310.00	214.68	4.00	0.77	0.54
comp114049_c0	comp114049_c0_seq1	1359.00	1263.56	61.71	2.01	1.40
comp11408_c0	comp11408_c0_seq1	395.00	299.64	9.00	1.24	0.86
comp11410_c0	comp11410_c0_seq1,comp11410_c0_seq2	376.08	280.73	8.00	1.17	0.82
comp114112_c0	comp114112_c0_seq1	361.00	265.66	14.00	2.17	1.52
comp114156_c0	comp114156_c0_seq1	429.00	333.63	6.00	0.74	0.52
comp114228_c0	comp114228_c0_seq1	646.00	550.58	31.00	2.32	1.62
comp11426_c0	comp11426_c0_seq1	606.00	510.58	11.00	0.89	0.62
comp114291_c0	comp114291_c0_seq1	803.00	707.56	30.00	1.75	1.22
comp114299_c0	comp114299_c0_seq1	474.00	378.61	13.00	1.41	0.99
comp114307_c0	comp114307_c0_seq1	967.00	871.56	48.00	2.27	1.58
comp114316_c0	comp114316_c0_seq1	541.00	445.59	13.00	1.20	0.84
comp114317_c0	comp114317_c0_seq1	1182.00	1086.56	54.00	2.05	1.43
comp114318_c0	comp114318_c0_seq1	841.00	745.56	48.00	2.65	1.85
comp114330_c0	comp114330_c0_seq1	441.00	345.62	15.00	1.79	1.25
comp114346_c0	comp114346_c0_seq1	482.00	386.61	23.00	2.45	1.71
comp114351_c0	comp114351_c0_seq1	650.00	554.58	27.00	2.01	1.40
comp114353_c0	comp114353_c0_seq1	422.00	326.63	15.00	1.89	1.32
comp114362_c0	comp114362_c0_seq1	697.00	601.57	18.00	1.23	0.86
comp11436_c0	comp11436_c0_seq1	333.00	237.67	7.00	1.21	0.85
comp114394_c0	comp114394_c0_seq1	824.00	728.56	22.00	1.24	0.87
comp1143_c0	comp1143_c0_seq1	681.00	585.57	30.00	2.11	1.47
comp114420_c0	comp114420_c0_seq1	830.00	734.56	19.00	1.07	0.74
comp114470_c0	comp114470_c0_seq1	302.00	206.69	11.00	2.19	1.53
comp114477_c0	comp114477_c0_seq1	758.00	662.57	26.00	1.62	1.13
comp114480_c0	comp114480_c0_seq1	968.00	872.56	40.00	1.89	1.32
comp114485_c0	comp114485_c0_seq1	520.00	424.60	11.00	1.07	0.74
comp114505_c0	comp114505_c0_seq1	384.00	288.64	15.00	2.14	1.49
comp114508_c0	comp114508_c0_seq1	324.00	228.68	9.00	1.62	1.13
comp114509_c0	comp114509_c0_seq1	516.00	420.60	12.00	1.18	0.82
comp114510_c0	comp114510_c0_seq1	559.00	463.59	19.00	1.69	1.18
comp114529_c0	comp114529_c0_seq1	846.00	750.56	29.00	1.59	1.11
comp114547_c0	comp114547_c0_seq1	733.00	637.57	29.00	1.87	1.31
comp11454_c0	comp11454_c0_seq1	410.00	314.63	4.00	0.52	0.37
comp114578_c0	comp114578_c0_seq1	926.00	830.56	37.00	1.83	1.28
comp114607_c0	comp114607_c0_seq1	354.00	258.66	12.00	1.91	1.33
comp114608_c0	comp114608_c0_seq1	488.00	392.61	23.00	2.41	1.68
comp114629_c0	comp114629_c0_seq1	598.00	502.58	22.00	1.80	1.26
comp114633_c0	comp114633_c0_seq1	359.00	263.66	7.00	1.09	0.76
comp114635_c0	comp114635_c0_seq1	332.00	236.67	21.00	3.66	2.55
comp11463_c0	comp11463_c0_seq1	437.00	341.62	5.00	0.60	0.42
comp1146_c0	comp1146_c0_seq1	419.00	323.63	15.00	1.91	1.33
comp114714_c0	comp114714_c0_seq1	348.00	252.66	12.00	1.96	1.37
comp11474_c0	comp11474_c0_seq1	425.00	329.63	14.00	1.75	1.22
comp114770_c0	comp114770_c0_seq1	455.00	359.62	15.00	1.72	1.20
comp11479_c0	comp11479_c0_seq1	653.00	557.58	10.00	0.74	0.52
comp11481_c0	comp11481_c0_seq1	551.00	455.59	8.00	0.72	0.50
comp114820_c0	comp114820_c0_seq1	1336.00	1240.56	51.00	1.69	1.18
comp11482_c0	comp11482_c0_seq1	823.00	727.56	15.00	0.85	0.59
comp114834_c0	comp114834_c0_seq1	357.00	261.66	2.00	0.32	0.22
comp11483_c0	comp11483_c0_seq1	865.00	769.56	42.00	2.25	1.57
comp114866_c0	comp114866_c0_seq1	815.00	719.56	38.00	2.18	1.52
comp1148_c0	comp1148_c0_seq1	377.00	281.65	17.00	2.49	1.74
comp114904_c0	comp114904_c0_seq1	379.00	283.65	13.00	1.89	1.32
comp114908_c0	comp114908_c0_seq1	605.00	509.58	21.00	1.70	1.18
comp114942_c0	comp114942_c0_seq1	527.00	431.60	11.00	1.05	0.73
comp114962_c0	comp114962_c0_seq1	354.00	258.66	8.00	1.27	0.89
comp114965_c0	comp114965_c0_seq1	553.00	457.59	26.00	2.34	1.63
comp114980_c0	comp114980_c0_seq1	1062.00	966.56	51.00	2.17	1.52
comp11499_c0	comp11499_c0_seq1	404.00	308.64	6.00	0.80	0.56
comp115000_c0	comp115000_c0_seq1	445.00	349.62	14.00	1.65	1.15
comp115003_c0	comp115003_c0_seq1	671.00	575.57	18.00	1.29	0.90
comp115006_c0	comp115006_c0_seq1	341.00	245.67	6.00	1.01	0.70
comp115041_c0	comp115041_c0_seq1	903.00	807.56	37.00	1.89	1.32
comp115057_c0	comp115057_c0_seq1	966.00	870.56	52.00	2.46	1.72
comp1150_c0	comp1150_c0_seq1	319.00	223.68	23.00	4.24	2.96
comp11512_c0	comp11512_c0_seq1	319.00	223.68	4.00	0.74	0.51
comp115160_c0	comp115160_c0_seq1	1682.00	1586.56	70.00	1.82	1.27
comp115167_c0	comp115167_c0_seq1	488.00	392.61	4.00	0.42	0.29
comp115195_c0	comp115195_c0_seq1	807.00	711.56	43.00	2.49	1.74
comp115222_c0	comp115222_c0_seq1	431.00	335.63	10.00	1.23	0.86
comp11522_c0	comp11522_c0_seq1	854.00	758.56	37.00	2.01	1.40
comp115231_c0	comp115231_c0_seq1	310.00	214.68	10.00	1.92	1.34
comp115246_c0	comp115246_c0_seq1	452.00	356.62	6.00	0.69	0.48
comp115278_c0	comp115278_c0_seq1	362.00	266.65	5.00	0.77	0.54
comp115296_c0	comp115296_c0_seq1	513.00	417.60	24.00	2.37	1.65
comp115297_c0	comp115297_c0_seq1	621.00	525.58	14.00	1.10	0.77
comp1152_c0	comp1152_c0_seq1	1422.00	1326.56	70.00	2.17	1.52
comp115303_c0	comp115303_c0_seq1	1725.00	1629.56	71.00	1.79	1.25
comp115328_c0	comp115328_c0_seq1	545.00	449.59	13.00	1.19	0.83
comp115337_c0	comp115337_c0_seq1	447.00	351.62	7.00	0.82	0.57
comp11534_c0	comp11534_c0_seq1	1650.00	1554.56	65.00	1.72	1.20
comp115371_c0	comp115371_c0_seq1	434.00	338.63	4.00	0.49	0.34
comp11539_c0	comp11539_c0_seq1,comp11539_c0_seq2	542.78	447.39	18.00	1.66	1.16
comp1153_c0	comp1153_c0_seq1	353.00	257.66	12.00	1.92	1.34
comp11541_c0	comp11541_c0_seq1	459.00	363.62	10.00	1.13	0.79
comp115434_c0	comp115434_c0_seq1	633.00	537.58	25.00	1.92	1.34
comp115455_c0	comp115455_c0_seq1	642.00	546.58	25.00	1.88	1.32
comp115475_c0	comp115475_c0_seq1	553.00	457.59	17.00	1.53	1.07
comp115484_c0	comp115484_c0_seq1	608.00	512.58	27.00	2.17	1.51
comp115497_c0	comp115497_c0_seq1	415.00	319.63	11.00	1.42	0.99
comp1154_c0	comp1154_c0_seq1	1944.00	1848.56	129.00	2.87	2.01
comp115548_c0	comp115548_c0_seq1	858.00	762.56	38.00	2.05	1.43
comp11558_c0	comp11558_c0_seq1	822.00	726.56	20.91	1.19	0.83
comp115713_c0	comp115713_c0_seq1	404.00	308.64	14.00	1.87	1.30
comp115733_c0	comp115733_c0_seq1	758.00	662.57	27.00	1.68	1.17
comp1157_c0	comp1157_c0_seq1	505.00	409.60	26.00	2.62	1.83
comp115819_c0	comp115819_c0_seq1	394.00	298.64	6.00	0.83	0.58
comp115853_c0	comp115853_c0_seq1	1128.00	1032.56	42.00	1.68	1.17
comp11585_c0	comp11585_c0_seq1	755.00	659.57	14.00	0.87	0.61
comp115868_c0	comp115868_c0_seq1	644.00	548.58	23.00	1.73	1.21
comp115889_c0	comp115889_c0_seq1	1142.00	1046.56	31.00	1.22	0.85
comp11590_c0	comp11590_c0_seq1	552.00	456.59	11.00	0.99	0.69
comp115916_c0	comp115916_c0_seq1	357.00	261.66	8.00	1.26	0.88
comp115937_c0	comp115937_c0_seq1	463.00	367.62	18.00	2.02	1.41
comp11593_c0	comp11593_c0_seq1	835.00	739.56	40.76	2.27	1.58
comp11597_c0	comp11597_c0_seq1	687.00	591.57	10.00	0.70	0.49
comp1159_c0	comp1159_c0_seq1	331.00	235.67	11.00	1.92	1.34
comp1159_c1	comp1159_c1_seq1	488.00	392.61	17.00	1.78	1.25
comp116038_c0	comp116038_c0_seq1	317.00	221.68	3.00	0.56	0.39
comp116084_c0	comp116084_c0_seq1	640.00	544.58	19.00	1.44	1.00
comp116094_c0	comp116094_c0_seq1	889.00	793.56	28.00	1.45	1.01
comp116098_c0	comp116098_c0_seq1	1031.00	935.56	38.00	1.67	1.17
comp116138_c0	comp116138_c0_seq1	953.00	857.56	26.00	1.25	0.87
comp116163_c0	comp116163_c0_seq1	361.00	265.66	9.00	1.40	0.97
comp11616_c0	comp11616_c0_seq1	564.00	468.59	21.00	1.85	1.29
comp11617_c0	comp11617_c0_seq1	812.00	716.56	20.00	1.15	0.80
comp11620_c0	comp11620_c0_seq1	435.00	339.62	9.00	1.09	0.76
comp116218_c0	comp116218_c0_seq1	874.00	778.56	34.00	1.80	1.26
comp1162_c0	comp1162_c0_seq1,comp1162_c0_seq2	463.31	367.93	22.00	2.46	1.72
comp11633_c0	comp11633_c0_seq1	434.00	338.63	4.00	0.49	0.34
comp116348_c0	comp116348_c0_seq1	631.00	535.58	18.02	1.39	0.97
comp116386_c0	comp116386_c0_seq1	309.00	213.69	5.00	0.96	0.67
comp116398_c0	comp116398_c0_seq1	465.00	369.61	15.00	1.67	1.17
comp116419_c0	comp116419_c0_seq1	342.00	246.67	8.00	1.34	0.93
comp116429_c0	comp116429_c0_seq1	656.00	560.57	9.00	0.66	0.46
comp1164_c0	comp1164_c0_seq1	352.00	256.66	5.00	0.80	0.56
comp116510_c0	comp116510_c0_seq1	1186.00	1090.56	51.00	1.93	1.34
comp11655_c0	comp11655_c0_seq1	659.00	563.57	24.00	1.75	1.22
comp116568_c0	comp116568_c0_seq1	708.00	612.57	24.00	1.61	1.13
comp1165_c0	comp1165_c0_seq1	770.00	674.56	32.00	1.95	1.36
comp116672_c0	comp116672_c0_seq1	1039.00	943.56	38.00	1.66	1.16
comp116682_c0	comp116682_c0_seq1	593.00	497.58	25.00	2.07	1.44
comp1166_c0	comp1166_c0_seq1	680.00	584.57	26.00	1.83	1.28
comp116739_c0	comp116739_c0_seq1	685.00	589.57	30.00	2.10	1.46
comp116752_c0	comp116752_c0_seq1	1032.00	936.56	39.10	1.72	1.20
comp116797_c0	comp116797_c0_seq1	361.00	265.66	14.00	2.17	1.52
comp116860_c0	comp116860_c0_seq1	322.00	226.68	1.00	0.18	0.13
comp11687_c0	comp11687_c0_seq1	427.00	331.63	3.00	0.37	0.26
comp116891_c0	comp116891_c0_seq1	305.00	209.69	11.00	2.16	1.51
comp11692_c0	comp11692_c0_seq1	312.00	216.68	2.00	0.38	0.27
comp116937_c0	comp116937_c0_seq1	483.00	387.61	16.00	1.70	1.19
comp116941_c0	comp116941_c0_seq1	432.00	336.63	7.00	0.86	0.60
comp11695_c0	comp11695_c0_seq1	689.00	593.57	17.00	1.18	0.82
comp116983_c0	comp116983_c0_seq1	634.00	538.58	8.00	0.61	0.43
comp116986_c0	comp116986_c0_seq1	1167.00	1071.56	62.86	2.42	1.69
comp11699_c0	comp11699_c0_seq1	592.00	496.58	15.00	1.24	0.87
comp116_c0	comp116_c0_seq1	310.00	214.68	1.00	0.19	0.13
comp117038_c0	comp117038_c0_seq1	403.00	307.64	4.00	0.54	0.37
comp11703_c0	comp11703_c0_seq1	754.00	658.57	17.00	1.06	0.74
comp117046_c0	comp117046_c0_seq1	646.00	550.58	28.00	2.09	1.46
comp117050_c0	comp117050_c0_seq1	309.00	213.69	11.00	2.12	1.48
comp1170_c0	comp1170_c0_seq1	774.00	678.56	46.00	2.79	1.95
comp117135_c0	comp117135_c0_seq1	440.00	344.62	20.00	2.39	1.67
comp117136_c0	comp117136_c0_seq1	320.00	224.68	11.00	2.02	1.41
comp117200_c0	comp117200_c0_seq1	351.00	255.66	3.00	0.48	0.34
comp117211_c0	comp117211_c0_seq1	334.00	238.67	0.00	0.00	0.00
comp11723_c0	comp11723_c0_seq1	380.00	284.65	7.00	1.01	0.71
comp117247_c0	comp117247_c0_seq1	565.00	469.59	13.93	1.22	0.85
comp117269_c0	comp117269_c0_seq1	452.00	356.62	19.00	2.20	1.53
comp1172_c0	comp1172_c0_seq1	1137.00	1041.56	77.00	3.04	2.12
comp11732_c0	comp11732_c0_seq1	448.00	352.62	12.00	1.40	0.98
comp11735_c0	comp11735_c0_seq1	773.00	677.56	26.00	1.58	1.10
comp11736_c0	comp11736_c0_seq1	588.00	492.59	14.00	1.17	0.82
comp117379_c0	comp117379_c0_seq1	333.00	237.67	13.00	2.25	1.57
comp1173_c0	comp1173_c0_seq1	474.00	378.61	16.00	1.74	1.22
comp117404_c0	comp117404_c0_seq1	307.00	211.69	5.00	0.97	0.68
comp1174_c0	comp1174_c0_seq1	446.00	350.62	23.00	2.70	1.89
comp117510_c0	comp117510_c0_seq1	337.00	241.67	2.00	0.34	0.24
comp117612_c0	comp117612_c0_seq1	580.00	484.59	22.00	1.87	1.31
comp11761_c0	comp11761_c0_seq1	393.00	297.64	4.00	0.55	0.39
comp11764_c0	comp11764_c0_seq1	317.00	221.68	2.00	0.37	0.26
comp117672_c0	comp117672_c0_seq1	374.00	278.65	8.00	1.18	0.83
comp11767_c0	comp11767_c0_seq1	307.00	211.69	2.00	0.39	0.27
comp1176_c0	comp1176_c0_seq1	1262.00	1166.56	77.00	2.72	1.90
comp117707_c0	comp117707_c0_seq1	748.00	652.57	35.00	2.21	1.54
comp11773_c0	comp11773_c0_seq1	786.00	690.56	12.00	0.72	0.50
comp11774_c0	comp11774_c0_seq1	391.00	295.64	3.00	0.42	0.29
comp11776_c0	comp11776_c0_seq1	668.00	572.57	15.00	1.08	0.75
comp117815_c0	comp117815_c0_seq1	984.00	888.56	49.00	2.27	1.59
comp11785_c0	comp11785_c0_seq1	361.00	265.66	5.00	0.78	0.54
comp1178_c0	comp1178_c0_seq1	528.00	432.60	8.00	0.76	0.53
comp117949_c0	comp117949_c0_seq1	910.00	814.56	40.00	2.02	1.41
comp117967_c0	comp117967_c0_seq1	404.00	308.64	7.00	0.93	0.65
comp11797_c0	comp11797_c0_seq1	377.00	281.65	5.00	0.73	0.51
comp117_c0	comp117_c0_seq1	472.00	376.61	4.00	0.44	0.31
comp11800_c0	comp11800_c0_seq1	629.00	533.58	17.00	1.31	0.92
comp118020_c0	comp118020_c0_seq1	727.00	631.57	33.00	2.15	1.50
comp118090_c0	comp118090_c0_seq1	718.00	622.57	19.00	1.26	0.88
comp118095_c0	comp118095_c0_seq1	446.00	350.62	20.00	2.35	1.64
comp11809_c0	comp11809_c0_seq1	401.00	305.64	8.00	1.08	0.75
comp1180_c0	comp1180_c0_seq1	732.00	636.57	32.00	2.07	1.45
comp118131_c0	comp118131_c0_seq1	916.00	820.56	34.08	1.71	1.19
comp118158_c0	comp118158_c0_seq1	752.00	656.57	47.00	2.95	2.06
comp118175_c0	comp118175_c0_seq1	449.00	353.62	20.00	2.33	1.63
comp118191_c0	comp118191_c0_seq1	461.00	365.62	18.00	2.03	1.42
comp118251_c0	comp118251_c0_seq1	1607.00	1511.56	78.00	2.12	1.48
comp118258_c0	comp118258_c0_seq1	363.00	267.65	4.00	0.62	0.43
comp118296_c0	comp118296_c0_seq1	369.00	273.65	7.00	1.05	0.74
comp11829_c0	comp11829_c0_seq1	471.00	375.61	8.00	0.88	0.61
comp1182_c0	comp1182_c0_seq1	304.00	208.69	17.00	3.36	2.34
comp118306_c0	comp118306_c0_seq1	752.00	656.57	24.00	1.51	1.05
comp118318_c0	comp118318_c0_seq1	537.00	441.60	11.00	1.03	0.72
comp118336_c0	comp118336_c0_seq1	639.00	543.58	25.00	1.89	1.32
comp11833_c0	comp11833_c0_seq1	819.00	723.56	15.00	0.85	0.60
comp118340_c0	comp118340_c0_seq1,comp118340_c0_seq2	1112.00	1016.56	39.00	1.58	1.10
comp118345_c0	comp118345_c0_seq1	435.00	339.62	22.00	2.67	1.86
comp118346_c0	comp118346_c0_seq1	418.00	322.63	11.00	1.40	0.98
comp118357_c0	comp118357_c0_seq1	619.00	523.58	19.00	1.49	1.04
comp11836_c0	comp11836_c0_seq1	503.00	407.60	10.00	1.01	0.71
comp118379_c0	comp118379_c0_seq1	778.00	682.56	26.00	1.57	1.10
comp118387_c0	comp118387_c0_seq1	1357.00	1261.56	58.00	1.89	1.32
comp118399_c0	comp118399_c0_seq1	476.00	380.61	14.00	1.52	1.06
comp118404_c0	comp118404_c0_seq1	359.00	263.66	11.00	1.72	1.20
comp11841_c0	comp11841_c0_seq1	311.00	215.68	3.00	0.57	0.40
comp11843_c0	comp11843_c0_seq1	363.00	267.65	3.00	0.46	0.32
comp118443_c0	comp118443_c0_seq1	373.00	277.65	7.00	1.04	0.73
comp118444_c0	comp118444_c0_seq1	361.00	265.66	5.00	0.78	0.54
comp118460_c0	comp118460_c0_seq1	441.00	345.62	2.00	0.24	0.17
comp118477_c0	comp118477_c0_seq1,comp118477_c0_seq2	407.00	311.64	16.00	2.12	1.48
comp11847_c0	comp11847_c0_seq1	678.00	582.57	14.00	0.99	0.69
comp118489_c0	comp118489_c0_seq1	348.00	252.66	7.00	1.14	0.80
comp118511_c0	comp118511_c0_seq1	332.00	236.67	14.00	2.44	1.70
comp118545_c0	comp118545_c0_seq1	809.00	713.56	20.00	1.15	0.81
comp118562_c0	comp118562_c0_seq1	525.00	429.60	12.00	1.15	0.80
comp118594_c0	comp118594_c0_seq1	391.00	295.64	8.00	1.12	0.78
comp118608_c0	comp118608_c0_seq1	889.00	793.56	43.00	2.23	1.56
comp118616_c0	comp118616_c0_seq1	1275.00	1179.56	30.00	1.05	0.73
comp118617_c0	comp118617_c0_seq1	342.00	246.67	16.00	2.67	1.87
comp118627_c0	comp118627_c0_seq1	390.00	294.64	12.00	1.68	1.17
comp118630_c0	comp118630_c0_seq1	553.00	457.59	21.00	1.89	1.32
comp11863_c0	comp11863_c0_seq1	797.00	701.56	14.00	0.82	0.57
comp118662_c0	comp118662_c0_seq1	586.00	490.59	24.00	2.02	1.41
comp118679_c0	comp118679_c0_seq1	447.00	351.62	4.00	0.47	0.33
comp11867_c0	comp11867_c0_seq1	349.00	253.66	1.00	0.16	0.11
comp1186_c0	comp1186_c0_seq1	336.00	240.67	14.00	2.40	1.67
comp118735_c0	comp118735_c0_seq1	707.00	611.57	26.00	1.75	1.22
comp118773_c0	comp118773_c0_seq1	1120.00	1024.56	38.00	1.53	1.07
comp118788_c0	comp118788_c0_seq1	489.00	393.61	6.00	0.63	0.44
comp118793_c0	comp118793_c0_seq1	803.00	707.56	30.00	1.75	1.22
comp118819_c0	comp118819_c0_seq1	486.00	390.61	22.00	2.32	1.62
comp11883_c0	comp11883_c0_seq1	373.00	277.65	3.00	0.45	0.31
comp118866_c0	comp118866_c0_seq1	310.00	214.68	3.00	0.58	0.40
comp118885_c0	comp118885_c0_seq1	509.00	413.60	18.00	1.79	1.25
comp11889_c0	comp11889_c0_seq1	316.00	220.68	2.00	0.37	0.26
comp1188_c0	comp1188_c0_seq1	537.00	441.60	24.00	2.24	1.56
comp118902_c0	comp118902_c0_seq1	475.00	379.61	18.00	1.95	1.36
comp118917_c0	comp118917_c0_seq1	1084.00	988.56	47.00	1.96	1.37
comp11894_c0	comp11894_c0_seq1	827.00	731.56	51.00	2.87	2.00
comp118955_c0	comp118955_c0_seq1	644.00	548.58	22.00	1.65	1.15
comp118956_c0	comp118956_c0_seq1	790.00	694.56	29.00	1.72	1.20
comp118981_c0	comp118981_c0_seq1	311.00	215.68	7.00	1.34	0.93
comp119002_c0	comp119002_c0_seq1	384.00	288.64	11.00	1.57	1.10
comp119020_c0	comp119020_c0_seq1	578.00	482.59	30.00	2.56	1.79
comp119026_c0	comp119026_c0_seq1	407.00	311.64	13.00	1.72	1.20
comp11902_c0	comp11902_c0_seq1	470.00	374.61	14.00	1.54	1.07
comp119043_c0	comp119043_c0_seq1	993.00	897.56	45.00	2.06	1.44
comp119073_c0	comp119073_c0_seq1	354.00	258.66	15.00	2.39	1.67
comp11909_c0	comp11909_c0_seq1	424.00	328.63	11.00	1.38	0.96
comp1190_c0	comp1190_c0_seq1	539.00	443.60	33.00	3.06	2.14
comp119114_c0	comp119114_c0_seq1	988.00	892.56	41.00	1.89	1.32
comp119120_c0	comp119120_c0_seq1	562.00	466.59	17.00	1.50	1.05
comp119123_c0	comp119123_c0_seq1	448.00	352.62	22.00	2.57	1.79
comp11912_c0	comp11912_c0_seq1	1006.00	910.56	23.00	1.04	0.73
comp119149_c0	comp119149_c0_seq1	809.00	713.56	33.00	1.90	1.33
comp119178_c0	comp119178_c0_seq1	545.00	449.59	15.00	1.37	0.96
comp119190_c0	comp119190_c0_seq1	523.00	427.60	18.00	1.73	1.21
comp119203_c0	comp119203_c0_seq1	655.00	559.57	32.00	2.36	1.64
comp11922_c0	comp11922_c0_seq1	984.00	888.56	38.00	1.76	1.23
comp119273_c0	comp119273_c0_seq1	340.00	244.67	5.00	0.84	0.59
comp119286_c0	comp119286_c0_seq1	2703.00	2607.56	89.00	1.41	0.98
comp1192_c0	comp1192_c0_seq1	409.00	313.63	7.00	0.92	0.64
comp119365_c0	comp119365_c0_seq1	362.00	266.65	10.00	1.55	1.08
comp11936_c0	comp11936_c0_seq1	348.00	252.66	2.00	0.33	0.23
comp119383_c0	comp119383_c0_seq1	301.00	205.69	4.00	0.80	0.56
comp119391_c0	comp119391_c0_seq1	377.00	281.65	9.00	1.32	0.92
comp11946_c0	comp11946_c0_seq1	319.00	223.68	4.00	0.74	0.51
comp11949_c0	comp11949_c0_seq1	454.00	358.62	5.00	0.57	0.40
comp11950_c0	comp11950_c0_seq1	555.00	459.59	8.00	0.72	0.50
comp119515_c0	comp119515_c0_seq1	569.00	473.59	20.00	1.74	1.21
comp11954_c0	comp11954_c0_seq1	648.00	552.58	39.00	2.91	2.03
comp119563_c0	comp119563_c0_seq1	476.00	380.61	20.00	2.17	1.51
comp119584_c0	comp119584_c0_seq1	323.00	227.68	6.00	1.09	0.76
comp119596_c0	comp119596_c0_seq1	328.00	232.67	3.00	0.53	0.37
comp1195_c0	comp1195_c0_seq1	1467.00	1371.56	97.00	2.91	2.03
comp1195_c1	comp1195_c1_seq1	363.00	267.65	10.00	1.54	1.07
comp119606_c0	comp119606_c0_seq1	602.00	506.58	16.00	1.30	0.91
comp119649_c0	comp119649_c0_seq1	370.00	274.65	6.00	0.90	0.63
comp119658_c0	comp119658_c0_seq1	1247.00	1151.56	65.00	2.32	1.62
comp11965_c0	comp11965_c0_seq1	452.00	356.62	8.00	0.92	0.65
comp119679_c0	comp119679_c0_seq1	392.00	296.64	2.00	0.28	0.19
comp11968_c0	comp11968_c0_seq1	432.00	336.63	5.00	0.61	0.43
comp1196_c0	comp1196_c0_seq1	832.00	736.56	47.00	2.63	1.83
comp119734_c0	comp119734_c0_seq1	327.00	231.67	2.00	0.36	0.25
comp119736_c0	comp119736_c0_seq1	450.00	354.62	13.00	1.51	1.05
comp119753_c0	comp119753_c0_seq1	614.00	518.58	20.00	1.59	1.11
comp119758_c0	comp119758_c0_seq1	656.00	560.57	20.00	1.47	1.03
comp119763_c0	comp119763_c0_seq1	373.00	277.65	9.00	1.34	0.93
comp119773_c0	comp119773_c0_seq1	366.00	270.65	3.00	0.46	0.32
comp119798_c0	comp119798_c0_seq1	536.00	440.60	17.00	1.59	1.11
comp119876_c0	comp119876_c0_seq1	363.00	267.65	14.00	2.16	1.50
comp119884_c0	comp119884_c0_seq1	346.00	250.66	7.00	1.15	0.80
comp119914_c0	comp119914_c0_seq1	457.00	361.62	18.00	2.05	1.43
comp11991_c0	comp11991_c0_seq1	825.00	729.56	19.00	1.07	0.75
comp119933_c0	comp119933_c0_seq1	332.00	236.67	15.00	2.61	1.82
comp119947_c0	comp119947_c0_seq1	356.00	260.66	9.00	1.42	0.99
comp119981_c0	comp119981_c0_seq1	838.00	742.56	48.00	2.66	1.86
comp1199_c0	comp1199_c0_seq1,comp1199_c0_seq2	436.61	341.23	27.00	3.26	2.28
comp11_c0	comp11_c0_seq1	363.00	267.65	10.00	1.54	1.07
comp11_c1	comp11_c1_seq1	463.00	367.62	12.00	1.34	0.94
comp120008_c0	comp120008_c0_seq1	510.00	414.60	14.00	1.39	0.97
comp12000_c0	comp12000_c0_seq1	367.00	271.65	7.00	1.06	0.74
comp120011_c0	comp120011_c0_seq1	385.00	289.64	6.00	0.85	0.60
comp120018_c0	comp120018_c0_seq1	648.00	552.58	27.00	2.01	1.40
comp120046_c0	comp120046_c0_seq1	471.00	375.61	17.00	1.86	1.30
comp120070_c0	comp120070_c0_seq1	471.00	375.61	17.00	1.86	1.30
comp120078_c0	comp120078_c0_seq1	410.00	314.63	18.00	2.36	1.65
comp12007_c0	comp12007_c0_seq1	344.00	248.66	3.97	0.66	0.46
comp1200_c0	comp1200_c0_seq1	668.00	572.57	34.00	2.45	1.71
comp120120_c0	comp120120_c0_seq1	845.00	749.56	29.01	1.59	1.11
comp120137_c0	comp120137_c0_seq1	332.00	236.67	12.00	2.09	1.46
comp12019_c0	comp12019_c0_seq1	1074.00	978.56	35.00	1.47	1.03
comp1201_c0	comp1201_c0_seq1	301.00	205.69	10.00	2.00	1.40
comp12022_c0	comp12022_c0_seq1	334.00	238.67	6.00	1.04	0.72
comp120322_c0	comp120322_c0_seq1	1081.00	985.56	46.00	1.92	1.34
comp120331_c0	comp120331_c0_seq1	727.00	631.57	30.02	1.96	1.37
comp120343_c0	comp120343_c0_seq1	506.00	410.60	25.00	2.51	1.75
comp120346_c0	comp120346_c0_seq1	421.00	325.63	14.00	1.77	1.24
comp120359_c0	comp120359_c0_seq1	341.00	245.67	5.00	0.84	0.59
comp120366_c0	comp120366_c0_seq1	939.00	843.56	19.00	0.93	0.65
comp12044_c0	comp12044_c0_seq1	445.00	349.62	8.00	0.94	0.66
comp120463_c0	comp120463_c0_seq1	1204.00	1108.56	45.00	1.67	1.17
comp1204_c0	comp1204_c0_seq1	337.00	241.67	10.00	1.71	1.19
comp120516_c0	comp120516_c0_seq1	305.00	209.69	0.00	0.00	0.00
comp12054_c0	comp12054_c0_seq1	675.00	579.57	13.00	0.92	0.64
comp120556_c0	comp120556_c0_seq1	587.00	491.59	20.00	1.68	1.17
comp120607_c0	comp120607_c0_seq1	433.00	337.63	4.00	0.49	0.34
comp120608_c0	comp120608_c0_seq1	449.00	353.62	7.00	0.82	0.57
comp120630_c0	comp120630_c0_seq1	414.00	318.63	11.00	1.42	0.99
comp120638_c0	comp120638_c0_seq1	648.00	552.58	18.00	1.34	0.94
comp12065_c0	comp12065_c0_seq1	909.00	813.56	22.00	1.11	0.78
comp120702_c0	comp120702_c0_seq1	585.00	489.59	11.00	0.93	0.65
comp120733_c0	comp120733_c0_seq1	708.00	612.57	22.00	1.48	1.03
comp120739_c0	comp120739_c0_seq1	751.00	655.57	25.00	1.57	1.10
comp120742_c0	comp120742_c0_seq1	842.00	746.56	29.00	1.60	1.12
comp120757_c0	comp120757_c0_seq1	402.00	306.64	16.00	2.15	1.50
comp120778_c0	comp120778_c0_seq1	578.00	482.59	10.00	0.85	0.60
comp12079_c0	comp12079_c0_seq1	401.00	305.64	7.00	0.94	0.66
comp120821_c0	comp120821_c0_seq1	396.00	300.64	13.00	1.78	1.24
comp120824_c0	comp120824_c0_seq1	618.00	522.58	23.00	1.81	1.27
comp120829_c0	comp120829_c0_seq1	513.00	417.60	12.00	1.18	0.83
comp120832_c0	comp120832_c0_seq1	341.00	245.67	7.00	1.17	0.82
comp120850_c0	comp120850_c0_seq1	350.00	254.66	3.00	0.49	0.34
comp12085_c0	comp12085_c0_seq1	863.00	767.56	18.00	0.97	0.67
comp120904_c0	comp120904_c0_seq1	672.00	576.57	15.00	1.07	0.75
comp120905_c0	comp120905_c0_seq1	315.00	219.68	0.00	0.00	0.00
comp120953_c0	comp120953_c0_seq1	458.00	362.62	24.00	2.73	1.90
comp12095_c0	comp12095_c0_seq1	318.00	222.68	2.00	0.37	0.26
comp120994_c0	comp120994_c0_seq1	363.00	267.65	8.00	1.23	0.86
comp120_c0	comp120_c0_seq1	376.00	280.65	10.00	1.47	1.02
comp121013_c0	comp121013_c0_seq1	308.00	212.69	2.00	0.39	0.27
comp121044_c0	comp121044_c0_seq1	352.00	256.66	3.00	0.48	0.34
comp121067_c0	comp121067_c0_seq1	463.00	367.62	10.00	1.12	0.78
comp121080_c0	comp121080_c0_seq1	689.00	593.57	21.00	1.46	1.02
comp121191_c0	comp121191_c0_seq1	305.00	209.69	3.00	0.59	0.41
comp1211_c0	comp1211_c0_seq1	1769.00	1673.56	117.00	2.88	2.01
comp12121_c0	comp12121_c0_seq1	456.00	360.62	7.00	0.80	0.56
comp121254_c0	comp121254_c0_seq1	832.00	736.56	30.00	1.68	1.17
comp121261_c0	comp121261_c0_seq1	377.00	281.65	4.00	0.59	0.41
comp121299_c0	comp121299_c0_seq1	410.00	314.63	15.00	1.96	1.37
comp121356_c0	comp121356_c0_seq1	389.00	293.64	15.00	2.11	1.47
comp12137_c0	comp12137_c0_seq1	585.00	489.59	19.00	1.60	1.12
comp1213_c0	comp1213_c0_seq1	316.00	220.68	1.00	0.19	0.13
comp121426_c0	comp121426_c0_seq1	315.00	219.68	7.00	1.31	0.92
comp121441_c0	comp121441_c0_seq1	365.00	269.65	7.00	1.07	0.75
comp121443_c0	comp121443_c0_seq1	1203.00	1107.56	29.00	1.08	0.75
comp121501_c0	comp121501_c0_seq1	416.00	320.63	6.00	0.77	0.54
comp121504_c0	comp121504_c0_seq1	348.00	252.66	5.00	0.82	0.57
comp121510_c0	comp121510_c0_seq1	742.00	646.57	20.00	1.27	0.89
comp121570_c0	comp121570_c0_seq1	382.00	286.65	6.00	0.86	0.60
comp12157_c0	comp12157_c0_seq1	427.00	331.63	1.00	0.12	0.09
comp1216_c0	comp1216_c0_seq1	358.00	262.66	1.00	0.16	0.11
comp121704_c0	comp121704_c0_seq1	370.00	274.65	8.00	1.20	0.84
comp12172_c0	comp12172_c0_seq1	341.00	245.67	2.00	0.34	0.23
comp121754_c0	comp121754_c0_seq1	311.00	215.68	5.00	0.96	0.67
comp121755_c0	comp121755_c0_seq1	518.00	422.60	10.00	0.97	0.68
comp12176_c0	comp12176_c0_seq1	1026.00	930.56	17.00	0.75	0.53
comp12178_c0	comp12178_c0_seq1	477.00	381.61	6.00	0.65	0.45
comp121792_c0	comp121792_c0_seq1	391.00	295.64	15.00	2.09	1.46
comp121841_c0	comp121841_c0_seq1	373.00	277.65	8.00	1.19	0.83
comp121876_c0	comp121876_c0_seq1	333.00	237.67	10.00	1.73	1.21
comp121895_c0	comp121895_c0_seq1	846.00	750.56	26.00	1.43	1.00
comp121929_c0	comp121929_c0_seq1	351.00	255.66	16.00	2.58	1.80
comp121951_c0	comp121951_c0_seq1	588.00	492.59	11.00	0.92	0.64
comp12195_c0	comp12195_c0_seq1	385.00	289.64	4.00	0.57	0.40
comp121972_c0	comp121972_c0_seq1	1025.00	929.56	29.00	1.28	0.90
comp121987_c0	comp121987_c0_seq1	385.00	289.64	9.00	1.28	0.89
comp121_c0	comp121_c0_seq1	602.00	506.58	16.00	1.30	0.91
comp122063_c0	comp122063_c0_seq1	583.00	487.59	24.00	2.03	1.42
comp122073_c0	comp122073_c0_seq1	321.00	225.68	4.00	0.73	0.51
comp1220_c0	comp1220_c0_seq1,comp1220_c0_seq2	569.83	474.42	26.00	2.26	1.58
comp122140_c0	comp122140_c0_seq1	597.00	501.58	22.00	1.81	1.26
comp122150_c0	comp122150_c0_seq1	404.00	308.64	6.00	0.80	0.56
comp122173_c0	comp122173_c0_seq1	332.00	236.67	0.00	0.00	0.00
comp122250_c0	comp122250_c0_seq1	331.00	235.67	2.00	0.35	0.24
comp122304_c0	comp122304_c0_seq1	308.00	212.69	5.00	0.97	0.68
comp12230_c0	comp12230_c0_seq1	506.00	410.60	6.00	0.60	0.42
comp122360_c0	comp122360_c0_seq1	545.00	449.59	22.00	2.02	1.41
comp1223_c0	comp1223_c0_seq1	526.00	430.60	26.00	2.49	1.74
comp122476_c0	comp122476_c0_seq1	513.00	417.60	20.00	1.97	1.38
comp122485_c0	comp122485_c0_seq1	556.00	460.59	21.00	1.88	1.31
comp122509_c0	comp122509_c0_seq1	714.00	618.57	25.00	1.66	1.16
comp122515_c0	comp122515_c0_seq1	420.00	324.63	12.00	1.52	1.06
comp122517_c0	comp122517_c0_seq1	518.00	422.60	16.00	1.56	1.09
comp122518_c0	comp122518_c0_seq1	698.00	602.57	28.00	1.91	1.34
comp122526_c0	comp122526_c0_seq1	478.00	382.61	18.00	1.94	1.35
comp122542_c0	comp122542_c0_seq1	360.00	264.66	13.00	2.02	1.41
comp122543_c0	comp122543_c0_seq1	461.00	365.62	21.00	2.37	1.65
comp122548_c0	comp122548_c0_seq1	301.00	205.69	5.00	1.00	0.70
comp122552_c0	comp122552_c0_seq1	395.00	299.64	3.00	0.41	0.29
comp122570_c0	comp122570_c0_seq1	418.00	322.63	17.00	2.17	1.52
comp122574_c0	comp122574_c0_seq1	1097.00	1001.56	40.00	1.64	1.15
comp122588_c0	comp122588_c0_seq1	499.00	403.61	9.00	0.92	0.64
comp122595_c0	comp122595_c0_seq1	355.00	259.66	16.00	2.54	1.77
comp122598_c0	comp122598_c0_seq1	455.00	359.62	10.00	1.15	0.80
comp1225_c0	comp1225_c0_seq1	315.00	219.68	14.00	2.63	1.83
comp122601_c0	comp122601_c0_seq1	704.00	608.57	16.01	1.08	0.76
comp122602_c0	comp122602_c0_seq1	460.00	364.62	19.00	2.15	1.50
comp12262_c0	comp12262_c0_seq1	1083.00	987.56	23.00	0.96	0.67
comp122633_c0	comp122633_c0_seq1	515.00	419.60	16.00	1.57	1.10
comp122645_c0	comp122645_c0_seq1	464.00	368.62	16.00	1.79	1.25
comp122668_c0	comp122668_c0_seq1	507.00	411.60	19.00	1.90	1.33
comp122676_c0	comp122676_c0_seq1	514.00	418.60	11.00	1.08	0.76
comp122686_c0	comp122686_c0_seq1	973.00	877.56	39.00	1.83	1.28
comp122698_c0	comp122698_c0_seq1	793.00	697.56	30.00	1.77	1.24
comp122710_c0	comp122710_c0_seq1	635.00	539.58	16.00	1.22	0.85
comp122713_c0	comp122713_c0_seq1	585.00	489.59	8.00	0.67	0.47
comp122732_c0	comp122732_c0_seq1	721.00	625.57	25.00	1.65	1.15
comp122742_c0	comp122742_c0_seq1	631.00	535.58	19.00	1.46	1.02
comp122747_c0	comp122747_c0_seq1	612.00	516.58	18.00	1.44	1.00
comp122753_c0	comp122753_c0_seq1	592.00	496.58	18.00	1.49	1.04
comp122754_c0	comp122754_c0_seq1	1774.00	1678.56	60.00	1.47	1.03
comp122781_c0	comp122781_c0_seq1	475.00	379.61	11.00	1.19	0.83
comp122784_c0	comp122784_c0_seq1	1663.00	1567.56	60.00	1.58	1.10
comp122790_c0	comp122790_c0_seq1	438.00	342.62	18.00	2.16	1.51
comp1227_c0	comp1227_c0_seq1,comp1227_c0_seq2	636.28	540.86	22.00	1.68	1.17
comp122802_c0	comp122802_c0_seq1	1321.00	1225.56	41.00	1.38	0.96
comp12281_c0	comp12281_c0_seq1	456.00	360.62	12.00	1.37	0.96
comp122823_c0	comp122823_c0_seq1	650.00	554.58	26.00	1.93	1.35
comp122855_c0	comp122855_c0_seq1	351.00	255.66	16.00	2.58	1.80
comp122880_c0	comp122880_c0_seq1	361.00	265.66	3.00	0.47	0.32
comp122890_c0	comp122890_c0_seq1	746.00	650.57	9.79	0.62	0.43
comp122891_c0	comp122891_c0_seq1	315.00	219.68	6.00	1.13	0.79
comp1228_c0	comp1228_c0_seq1	911.00	815.56	43.00	2.17	1.52
comp122907_c0	comp122907_c0_seq1	756.00	660.57	27.00	1.68	1.18
comp122912_c0	comp122912_c0_seq1	430.00	334.63	11.00	1.35	0.95
comp122934_c0	comp122934_c0_seq1	903.00	807.56	37.00	1.89	1.32
comp122973_c0	comp122973_c0_seq1	379.00	283.65	2.00	0.29	0.20
comp12297_c0	comp12297_c0_seq1	437.00	341.62	6.00	0.72	0.51
comp122982_c0	comp122982_c0_seq1	637.00	541.58	13.00	0.99	0.69
comp122983_c0	comp122983_c0_seq1	365.00	269.65	2.00	0.31	0.21
comp122987_c0	comp122987_c0_seq1	413.00	317.63	6.00	0.78	0.54
comp122993_c0	comp122993_c0_seq1	440.00	344.62	8.00	0.96	0.67
comp1229_c0	comp1229_c0_seq1	923.00	827.56	40.00	1.99	1.39
comp123018_c0	comp123018_c0_seq1	304.00	208.69	5.00	0.99	0.69
comp123024_c0	comp123024_c0_seq1	414.00	318.63	15.00	1.94	1.35
comp12302_c0	comp12302_c0_seq1	349.00	253.66	3.00	0.49	0.34
comp123056_c0	comp123056_c0_seq1	408.00	312.63	18.00	2.37	1.66
comp123095_c0	comp123095_c0_seq1	479.00	383.61	13.00	1.40	0.97
comp12309_c0	comp12309_c0_seq1	670.00	574.57	20.00	1.43	1.00
comp123110_c0	comp123110_c0_seq1	520.00	424.60	16.00	1.55	1.08
comp123117_c0	comp123117_c0_seq1	989.00	893.56	36.00	1.66	1.16
comp123135_c0	comp123135_c0_seq1	577.00	481.59	20.00	1.71	1.19
comp123139_c0	comp123139_c0_seq1	1258.00	1162.56	52.00	1.84	1.29
comp123156_c0	comp123156_c0_seq1	476.00	380.61	12.00	1.30	0.91
comp123162_c0	comp123162_c0_seq1	320.00	224.68	7.00	1.28	0.90
comp12316_c0	comp12316_c0_seq1	302.00	206.69	2.00	0.40	0.28
comp123170_c0	comp123170_c0_seq1	405.00	309.64	7.00	0.93	0.65
comp12317_c0	comp12317_c0_seq1	486.00	390.61	9.00	0.95	0.66
comp123188_c0	comp123188_c0_seq1	709.00	613.57	30.00	2.01	1.41
comp123199_c0	comp123199_c0_seq1	443.00	347.62	10.00	1.19	0.83
comp123206_c0	comp123206_c0_seq1	656.00	560.57	21.00	1.54	1.08
comp123248_c0	comp123248_c0_seq1	585.00	489.59	20.00	1.68	1.17
comp12326_c0	comp12326_c0_seq1	355.00	259.66	10.00	1.59	1.11
comp123283_c0	comp123283_c0_seq1	790.00	694.56	28.00	1.66	1.16
comp123286_c0	comp123286_c0_seq1	604.00	508.58	27.00	2.19	1.53
comp1232_c0	comp1232_c0_seq1	421.00	325.63	20.00	2.53	1.77
comp12330_c0	comp12330_c0_seq1	762.00	666.56	36.00	2.22	1.55
comp12331_c0	comp12331_c0_seq1	422.00	326.63	11.00	1.39	0.97
comp123351_c0	comp123351_c0_seq1	1176.00	1080.56	44.00	1.68	1.17
comp123356_c0	comp123356_c0_seq1	442.00	346.62	14.00	1.66	1.16
comp123398_c0	comp123398_c0_seq1	653.00	557.58	20.00	1.48	1.03
comp123412_c0	comp123412_c0_seq1	426.00	330.63	13.00	1.62	1.13
comp123424_c0	comp123424_c0_seq1	318.00	222.68	4.00	0.74	0.52
comp123426_c0	comp123426_c0_seq1	389.00	293.64	10.00	1.40	0.98
comp123439_c0	comp123439_c0_seq1	2639.00	2543.56	91.00	1.47	1.03
comp123461_c0	comp123461_c0_seq1	614.00	518.58	25.75	2.05	1.43
comp12346_c0	comp12346_c0_seq1	501.00	405.60	7.00	0.71	0.50
comp123474_c0	comp123474_c0_seq1	667.00	571.57	23.00	1.66	1.16
comp123489_c0	comp123489_c0_seq1	403.00	307.64	8.00	1.07	0.75
comp123499_c0	comp123499_c0_seq1	482.00	386.61	13.00	1.39	0.97
comp123525_c0	comp123525_c0_seq1	305.00	209.69	4.00	0.79	0.55
comp123558_c0	comp123558_c0_seq1	660.00	564.57	29.00	2.12	1.48
comp123578_c0	comp123578_c0_seq1	649.00	553.58	16.00	1.19	0.83
comp123579_c0	comp123579_c0_seq1	314.00	218.68	7.00	1.32	0.92
comp12358_c0	comp12358_c0_seq1	704.00	608.57	24.00	1.62	1.13
comp1235_c0	comp1235_c0_seq1	312.00	216.68	5.00	0.95	0.66
comp12360_c0	comp12360_c0_seq1	340.00	244.67	7.00	1.18	0.82
comp123613_c0	comp123613_c0_seq1	645.00	549.58	12.00	0.90	0.63
comp123620_c0	comp123620_c0_seq1	464.00	368.62	11.00	1.23	0.86
comp123632_c0	comp123632_c0_seq1	884.00	788.56	38.85	2.03	1.42
comp123645_c0	comp123645_c0_seq1	1026.00	930.56	23.00	1.02	0.71
comp123655_c0	comp123655_c0_seq1	718.00	622.57	30.00	1.98	1.39
comp123678_c0	comp123678_c0_seq1	849.00	753.56	36.00	1.97	1.37
comp123691_c0	comp123691_c0_seq1	347.00	251.66	9.00	1.47	1.03
comp1236_c0	comp1236_c0_seq1	551.00	455.59	25.00	2.26	1.58
comp123702_c0	comp123702_c0_seq1	839.00	743.56	21.00	1.16	0.81
comp12371_c0	comp12371_c0_seq1	561.00	465.59	11.00	0.97	0.68
comp123722_c0	comp123722_c0_seq1	316.00	220.68	5.00	0.93	0.65
comp123730_c0	comp123730_c0_seq1	435.00	339.62	6.00	0.73	0.51
comp123733_c0	comp123733_c0_seq1	397.00	301.64	12.00	1.64	1.14
comp123787_c0	comp123787_c0_seq1	831.00	735.56	39.00	2.18	1.52
comp123807_c0	comp123807_c0_seq1	336.00	240.67	6.00	1.03	0.72
comp123818_c0	comp123818_c0_seq1	603.00	507.58	18.00	1.46	1.02
comp123820_c0	comp123820_c0_seq1	370.00	274.65	3.00	0.45	0.31
comp123826_c0	comp123826_c0_seq1	339.00	243.67	1.00	0.17	0.12
comp123830_c0	comp123830_c0_seq1	433.00	337.63	15.00	1.83	1.28
comp123841_c0	comp123841_c0_seq1	443.00	347.62	19.00	2.25	1.57
comp123842_c0	comp123842_c0_seq1	4199.00	4103.56	159.00	1.60	1.11
comp123850_c0	comp123850_c0_seq1	422.00	326.63	19.00	2.40	1.67
comp123861_c0	comp123861_c0_seq1	619.00	523.58	26.00	2.05	1.43
comp123901_c0	comp123901_c0_seq1	326.00	230.67	9.00	1.61	1.12
comp123903_c0	comp123903_c0_seq1	327.00	231.67	11.00	1.96	1.37
comp123916_c0	comp123916_c0_seq1	601.00	505.58	18.00	1.47	1.02
comp123921_c0	comp123921_c0_seq1	396.00	300.64	17.00	2.33	1.63
comp123929_c0	comp123929_c0_seq1	627.00	531.58	19.00	1.47	1.03
comp123933_c0	comp123933_c0_seq1	429.00	333.63	15.00	1.85	1.29
comp12394_c0	comp12394_c0_seq1	534.00	438.60	10.00	0.94	0.66
comp123967_c0	comp123967_c0_seq1	574.00	478.59	20.00	1.72	1.20
comp12401_c0	comp12401_c0_seq1	332.00	236.67	1.00	0.17	0.12
comp124043_c0	comp124043_c0_seq1	422.00	326.63	13.00	1.64	1.14
comp124046_c0	comp124046_c0_seq1	680.00	584.57	27.00	1.90	1.33
comp124066_c0	comp124066_c0_seq1	1016.00	920.56	26.00	1.16	0.81
comp12406_c0	comp12406_c0_seq1	355.00	259.66	4.00	0.63	0.44
comp124110_c0	comp124110_c0_seq1	625.00	529.58	15.00	1.17	0.81
comp12412_c0	comp12412_c0_seq1	508.00	412.60	11.00	1.10	0.77
comp124153_c0	comp124153_c0_seq1	384.00	288.64	10.00	1.43	1.00
comp124159_c0	comp124159_c0_seq1	1192.00	1096.56	52.00	1.95	1.36
comp12420_c0	comp12420_c0_seq1,comp12420_c0_seq2	689.00	593.57	11.00	0.76	0.53
comp124222_c0	comp124222_c0_seq1	936.00	840.56	45.00	2.20	1.54
comp124245_c0	comp124245_c0_seq1	626.00	530.58	27.00	2.10	1.46
comp12425_c0	comp12425_c0_seq1	624.00	528.58	10.00	0.78	0.54
comp124283_c0	comp124283_c0_seq1	394.00	298.64	14.00	1.93	1.35
comp124291_c0	comp124291_c0_seq1	665.00	569.57	24.65	1.78	1.24
comp124309_c0	comp124309_c0_seq1	456.00	360.62	14.00	1.60	1.12
comp124330_c0	comp124330_c0_seq1	358.00	262.66	6.00	0.94	0.66
comp124346_c0	comp124346_c0_seq1	497.00	401.61	9.00	0.92	0.64
comp124368_c0	comp124368_c0_seq1	480.00	384.61	1.00	0.11	0.07
comp12436_c0	comp12436_c0_seq1	382.00	286.65	4.00	0.58	0.40
comp124374_c0	comp124374_c0_seq1	430.00	334.63	11.00	1.35	0.95
comp124387_c0	comp124387_c0_seq1	836.00	740.56	32.00	1.78	1.24
comp124394_c0	comp124394_c0_seq1	323.00	227.68	6.00	1.09	0.76
comp12441_c0	comp12441_c0_seq1	562.00	466.59	4.00	0.35	0.25
comp124451_c0	comp124451_c0_seq1	479.00	383.61	14.00	1.50	1.05
comp124484_c0	comp124484_c0_seq1	303.00	207.69	3.00	0.60	0.42
comp124488_c0	comp124488_c0_seq1	788.00	692.56	28.00	1.67	1.16
comp124496_c0	comp124496_c0_seq1	467.00	371.61	13.00	1.44	1.01
comp1244_c0	comp1244_c0_seq1	323.00	227.68	7.00	1.27	0.88
comp12458_c0	comp12458_c0_seq1	335.00	239.67	3.00	0.52	0.36
comp124622_c0	comp124622_c0_seq1	315.00	219.68	8.00	1.50	1.05
comp124677_c0	comp124677_c0_seq1	308.00	212.69	6.00	1.16	0.81
comp124690_c0	comp124690_c0_seq1	631.00	535.58	22.00	1.69	1.18
comp124694_c0	comp124694_c0_seq1	459.00	363.62	14.00	1.59	1.11
comp124698_c0	comp124698_c0_seq1	492.00	396.61	14.00	1.45	1.02
comp1246_c0	comp1246_c0_seq1	348.00	252.66	5.00	0.82	0.57
comp124751_c0	comp124751_c0_seq1	669.00	573.57	33.00	2.37	1.65
comp12475_c0	comp12475_c0_seq1	341.00	245.67	7.00	1.17	0.82
comp124772_c0	comp124772_c0_seq1	371.00	275.65	12.00	1.79	1.25
comp124796_c0	comp124796_c0_seq1	480.00	384.61	21.00	2.25	1.57
comp1247_c0	comp1247_c0_seq1	339.00	243.67	9.00	1.52	1.06
comp12480_c0	comp12480_c0_seq1	509.00	413.60	11.00	1.10	0.76
comp12482_c0	comp12482_c0_seq1	521.00	425.60	14.00	1.36	0.95
comp124855_c0	comp124855_c0_seq1	358.00	262.66	5.00	0.78	0.55
comp12489_c0	comp12489_c0_seq1	793.00	697.56	13.00	0.77	0.54
comp1248_c0	comp1248_c0_seq1	412.00	316.63	17.00	2.21	1.54
comp124900_c0	comp124900_c0_seq1	1831.00	1735.56	76.00	1.80	1.26
comp124904_c0	comp124904_c0_seq1	484.00	388.61	8.00	0.85	0.59
comp124911_c0	comp124911_c0_seq1	408.00	312.63	8.00	1.05	0.74
comp124921_c0	comp124921_c0_seq1	806.00	710.56	12.00	0.70	0.49
comp124925_c0	comp124925_c0_seq1	692.00	596.57	20.00	1.38	0.96
comp124934_c0	comp124934_c0_seq1	555.00	459.59	19.00	1.70	1.19
comp124945_c0	comp124945_c0_seq1	346.00	250.66	12.00	1.97	1.38
comp124967_c0	comp124967_c0_seq1	443.00	347.62	13.00	1.54	1.08
comp124_c0	comp124_c0_seq1	330.00	234.67	8.00	1.41	0.98
comp12500_c0	comp12500_c0_seq1	319.00	223.68	5.00	0.92	0.64
comp12502_c0	comp12502_c0_seq1	409.00	313.63	12.00	1.58	1.10
comp125059_c0	comp125059_c0_seq1	301.00	205.69	13.00	2.61	1.82
comp125077_c0	comp125077_c0_seq1	379.00	283.65	13.00	1.89	1.32
comp125089_c0	comp125089_c0_seq1	430.00	334.63	5.00	0.62	0.43
comp1250_c0	comp1250_c0_seq1	475.00	379.61	24.00	2.60	1.82
comp125100_c0	comp125100_c0_seq1	733.00	637.57	11.00	0.71	0.50
comp125109_c0	comp125109_c0_seq1	1163.00	1067.56	38.00	1.47	1.02
comp125125_c0	comp125125_c0_seq1	803.00	707.56	38.00	2.21	1.54
comp125134_c0	comp125134_c0_seq1	435.00	339.62	12.00	1.46	1.02
comp125236_c0	comp125236_c0_seq1	680.00	584.57	11.00	0.78	0.54
comp125281_c0	comp125281_c0_seq1	491.00	395.61	17.00	1.77	1.24
comp125289_c0	comp125289_c0_seq1	301.00	205.69	0.00	0.00	0.00
comp125293_c0	comp125293_c0_seq1	519.00	423.60	16.00	1.56	1.09
comp125394_c0	comp125394_c0_seq1	774.00	678.56	0.00	0.00	0.00
comp125394_c1	comp125394_c1_seq1	797.00	701.56	18.00	1.06	0.74
comp12539_c0	comp12539_c0_seq1	404.00	308.64	6.00	0.80	0.56
comp1253_c0	comp1253_c0_seq1	314.00	218.68	3.00	0.57	0.39
comp125411_c0	comp125411_c0_seq1	541.00	445.59	20.00	1.85	1.29
comp125426_c0	comp125426_c0_seq1	836.00	740.56	27.00	1.50	1.05
comp125448_c0	comp125448_c0_seq1	497.00	401.61	16.00	1.64	1.15
comp125464_c0	comp125464_c0_seq1	534.00	438.60	17.00	1.60	1.11
comp12546_c0	comp12546_c0_seq1	645.00	549.58	18.00	1.35	0.94
comp125493_c0	comp125493_c0_seq1	429.00	333.63	11.00	1.36	0.95
comp1254_c0	comp1254_c0_seq1	332.00	236.67	17.00	2.96	2.07
comp125556_c0	comp125556_c0_seq1	653.00	557.58	30.00	2.22	1.55
comp1255_c0	comp1255_c0_seq1	591.00	495.58	35.00	2.91	2.03
comp125617_c0	comp125617_c0_seq1	423.00	327.63	8.00	1.01	0.70
comp125685_c0	comp125685_c0_seq1	472.00	376.61	15.00	1.64	1.15
comp12572_c0	comp12572_c0_seq1	355.00	259.66	3.00	0.48	0.33
comp125733_c0	comp125733_c0_seq1	362.00	266.65	6.00	0.93	0.65
comp125743_c0	comp125743_c0_seq1	366.00	270.65	9.00	1.37	0.96
comp125786_c0	comp125786_c0_seq1	583.00	487.59	19.00	1.61	1.12
comp125789_c0	comp125789_c0_seq1	670.00	574.57	16.00	1.15	0.80
comp125897_c0	comp125897_c0_seq1	565.00	469.59	21.00	1.84	1.29
comp125918_c0	comp125918_c0_seq1	385.00	289.64	7.00	1.00	0.70
comp12592_c0	comp12592_c0_seq1	356.00	260.66	2.00	0.32	0.22
comp125960_c0	comp125960_c0_seq1	380.00	284.65	6.00	0.87	0.61
comp12598_c0	comp12598_c0_seq1	429.00	333.63	9.00	1.11	0.78
comp125996_c0	comp125996_c0_seq1	800.00	704.56	33.00	1.93	1.35
comp125997_c0	comp125997_c0_seq1	499.00	403.61	12.00	1.22	0.85
comp125_c0	comp125_c0_seq1	346.00	250.66	7.00	1.15	0.80
comp126045_c0	comp126045_c0_seq1	331.00	235.67	7.00	1.22	0.85
comp126062_c0	comp126062_c0_seq1	326.00	230.67	0.00	0.00	0.00
comp126133_c0	comp126133_c0_seq1	386.00	290.64	4.00	0.57	0.40
comp126141_c0	comp126141_c0_seq1	309.00	213.69	3.00	0.58	0.40
comp126146_c0	comp126146_c0_seq1	319.00	223.68	7.00	1.29	0.90
comp126160_c0	comp126160_c0_seq1	605.00	509.58	20.00	1.62	1.13
comp12616_c0	comp12616_c0_seq1	338.00	242.67	1.00	0.17	0.12
comp126185_c0	comp126185_c0_seq1	326.00	230.67	2.00	0.36	0.25
comp126295_c0	comp126295_c0_seq1	493.00	397.61	18.00	1.87	1.30
comp12638_c0	comp12638_c0_seq1	481.00	385.61	7.00	0.75	0.52
comp1263_c0	comp1263_c0_seq1	399.00	303.64	3.00	0.41	0.28
comp126460_c0	comp126460_c0_seq1	422.00	326.63	7.00	0.88	0.62
comp126473_c0	comp126473_c0_seq1	415.00	319.63	4.00	0.52	0.36
comp1264_c0	comp1264_c0_seq1	602.00	506.58	33.00	2.68	1.87
comp12650_c0	comp12650_c0_seq1	322.00	226.68	2.00	0.36	0.25
comp126511_c0	comp126511_c0_seq1	706.00	610.57	19.00	1.28	0.89
comp126542_c0	comp126542_c0_seq1	494.00	398.61	4.00	0.41	0.29
comp12659_c0	comp12659_c0_seq1	937.00	841.56	41.00	2.01	1.40
comp126639_c0	comp126639_c0_seq1	515.00	419.60	19.00	1.87	1.30
comp12664_c0	comp12664_c0_seq1	748.00	652.57	24.00	1.51	1.06
comp12667_c0	comp12667_c0_seq1	717.00	621.57	23.00	1.52	1.06
comp12673_c0	comp12673_c0_seq1	1013.00	917.56	28.00	1.26	0.88
comp126777_c0	comp126777_c0_seq1	346.00	250.66	13.00	2.14	1.49
comp126778_c0	comp126778_c0_seq1	473.00	377.61	6.00	0.65	0.46
comp12686_c0	comp12686_c0_seq1	394.00	298.64	7.00	0.97	0.67
comp1268_c0	comp1268_c0_seq1	532.00	436.60	24.00	2.26	1.58
comp126914_c0	comp126914_c0_seq1	555.00	459.59	18.00	1.61	1.13
comp12692_c0	comp12692_c0_seq1	3704.00	3608.56	146.00	1.67	1.16
comp12698_c0	comp12698_c0_seq1	361.00	265.66	5.00	0.78	0.54
comp12701_c0	comp12701_c0_seq1	372.00	276.65	6.00	0.89	0.62
comp127087_c0	comp127087_c0_seq1	322.00	226.68	6.00	1.09	0.76
comp127146_c0	comp127146_c0_seq1	318.00	222.68	2.00	0.37	0.26
comp127157_c0	comp127157_c0_seq1	359.00	263.66	5.00	0.78	0.55
comp12725_c0	comp12725_c0_seq1	312.00	216.68	2.00	0.38	0.27
comp127282_c0	comp127282_c0_seq1	433.00	337.63	7.00	0.85	0.60
comp127306_c0	comp127306_c0_seq1	649.00	553.58	20.00	1.49	1.04
comp127314_c0	comp127314_c0_seq1	460.00	364.62	8.00	0.90	0.63
comp12742_c0	comp12742_c0_seq1	530.00	434.60	9.00	0.85	0.60
comp12743_c0	comp12743_c0_seq1	333.00	237.67	4.00	0.69	0.48
comp127470_c0	comp127470_c0_seq1	305.00	209.69	3.00	0.59	0.41
comp127496_c0	comp127496_c0_seq1	399.00	303.64	17.00	2.31	1.61
comp127500_c0	comp127500_c0_seq1	589.00	493.59	15.00	1.25	0.87
comp12750_c0	comp12750_c0_seq1	1164.00	1068.56	42.00	1.62	1.13
comp127510_c0	comp127510_c0_seq1	1179.00	1083.56	45.00	1.71	1.19
comp127515_c0	comp127515_c0_seq1	504.00	408.60	4.00	0.40	0.28
comp127533_c0	comp127533_c0_seq1	953.00	857.56	23.00	1.10	0.77
comp12755_c0	comp12755_c0_seq1	427.00	331.63	8.00	0.99	0.69
comp127655_c0	comp127655_c0_seq1	830.00	734.56	24.00	1.35	0.94
comp127673_c0	comp127673_c0_seq1	531.00	435.60	19.00	1.80	1.25
comp127685_c0	comp127685_c0_seq1	366.00	270.65	10.00	1.52	1.06
comp127689_c0	comp127689_c0_seq1	469.00	373.61	20.00	2.21	1.54
comp12768_c0	comp12768_c0_seq1	383.00	287.65	3.00	0.43	0.30
comp127696_c0	comp127696_c0_seq1	808.00	712.56	23.00	1.33	0.93
comp127697_c0	comp127697_c0_seq1	332.00	236.67	6.00	1.04	0.73
comp127698_c0	comp127698_c0_seq1	659.00	563.57	19.00	1.39	0.97
comp127707_c0	comp127707_c0_seq1	469.00	373.61	14.00	1.54	1.08
comp12771_c0	comp12771_c0_seq1	432.00	336.63	16.00	1.96	1.37
comp127743_c0	comp127743_c0_seq1	364.00	268.65	6.00	0.92	0.64
comp127765_c0	comp127765_c0_seq1	363.00	267.65	9.00	1.39	0.97
comp127789_c0	comp127789_c0_seq1	471.00	375.61	15.00	1.65	1.15
comp127797_c0	comp127797_c0_seq1	1376.00	1280.56	46.00	1.48	1.03
comp1277_c0	comp1277_c0_seq1,comp1277_c0_seq2	735.69	640.25	50.00	3.22	2.25
comp127803_c0	comp127803_c0_seq1	336.00	240.67	6.00	1.03	0.72
comp127821_c0	comp127821_c0_seq1	467.00	371.61	13.00	1.44	1.01
comp127839_c0	comp127839_c0_seq1	730.00	634.57	20.00	1.30	0.91
comp127854_c0	comp127854_c0_seq1	424.00	328.63	12.00	1.50	1.05
comp12785_c0	comp12785_c0_seq1	316.00	220.68	4.00	0.75	0.52
comp127869_c0	comp127869_c0_seq1	333.00	237.67	8.00	1.39	0.97
comp127870_c0	comp127870_c0_seq1	553.00	457.59	20.00	1.80	1.26
comp127898_c0	comp127898_c0_seq1	783.00	687.56	25.00	1.50	1.05
comp1278_c0	comp1278_c0_seq1,comp1278_c0_seq2	667.58	572.16	31.00	2.23	1.56
comp127901_c0	comp127901_c0_seq1	650.00	554.58	19.00	1.41	0.98
comp127910_c0	comp127910_c0_seq1	576.00	480.59	15.00	1.29	0.90
comp127916_c0	comp127916_c0_seq1	1166.00	1070.56	34.00	1.31	0.91
comp127932_c0	comp127932_c0_seq1	368.00	272.65	9.00	1.36	0.95
comp127951_c0	comp127951_c0_seq1	880.00	784.56	28.36	1.49	1.04
comp127952_c0	comp127952_c0_seq1	2503.00	2407.56	75.00	1.28	0.90
comp127961_c0	comp127961_c0_seq1	406.00	310.64	15.00	1.99	1.39
comp127965_c0	comp127965_c0_seq1	560.00	464.59	12.00	1.06	0.74
comp127972_c0	comp127972_c0_seq1	359.00	263.66	3.00	0.47	0.33
comp127_c0	comp127_c0_seq1	490.00	394.61	9.00	0.94	0.66
comp127_c1	comp127_c1_seq1	341.00	245.67	3.00	0.50	0.35
comp128000_c0	comp128000_c0_seq1	496.00	400.61	14.00	1.44	1.00
comp12802_c0	comp12802_c0_seq1	369.00	273.65	5.00	0.75	0.53
comp128046_c0	comp128046_c0_seq1	308.00	212.69	3.00	0.58	0.41
comp128064_c0	comp128064_c0_seq1	676.00	580.57	23.00	1.63	1.14
comp128080_c0	comp128080_c0_seq1	461.00	365.62	14.00	1.58	1.10
comp128099_c0	comp128099_c0_seq1	411.00	315.63	10.00	1.31	0.91
comp128101_c0	comp128101_c0_seq1	459.00	363.62	12.00	1.36	0.95
comp128111_c0	comp128111_c0_seq1	433.00	337.63	7.00	0.85	0.60
comp128126_c0	comp128126_c0_seq1	1403.00	1307.56	56.00	1.76	1.23
comp12813_c0	comp12813_c0_seq1	366.00	270.65	9.00	1.37	0.96
comp128148_c0	comp128148_c0_seq1	734.00	638.57	32.00	2.06	1.44
comp12814_c0	comp12814_c0_seq1	414.00	318.63	23.00	2.97	2.08
comp128158_c0	comp128158_c0_seq1	707.00	611.57	16.00	1.08	0.75
comp128191_c0	comp128191_c0_seq1	702.00	606.57	22.00	1.49	1.04
comp128196_c0	comp128196_c0_seq1	303.00	207.69	2.00	0.40	0.28
comp12819_c0	comp12819_c0_seq1	805.00	709.56	13.00	0.75	0.53
comp1281_c0	comp1281_c0_seq1	618.00	522.58	26.00	2.05	1.43
comp128203_c0	comp128203_c0_seq1	358.00	262.66	10.00	1.57	1.10
comp128213_c0	comp128213_c0_seq1	697.00	601.57	28.00	1.92	1.34
comp128215_c0	comp128215_c0_seq1	703.00	607.57	23.00	1.56	1.09
comp128218_c0	comp128218_c0_seq1	504.00	408.60	18.00	1.81	1.27
comp128222_c0	comp128222_c0_seq1	301.00	205.69	6.00	1.20	0.84
comp12822_c0	comp12822_c0_seq1	378.00	282.65	1.00	0.15	0.10
comp128232_c0	comp128232_c0_seq1	573.00	477.59	19.00	1.64	1.14
comp128242_c0	comp128242_c0_seq1	367.00	271.65	10.00	1.52	1.06
comp128248_c0	comp128248_c0_seq1	654.00	558.58	22.00	1.62	1.13
comp128259_c0	comp128259_c0_seq1	470.00	374.61	11.00	1.21	0.84
comp128265_c0	comp128265_c0_seq1	538.00	442.60	22.00	2.05	1.43
comp12826_c0	comp12826_c0_seq1	342.00	246.67	3.00	0.50	0.35
comp128272_c0	comp128272_c0_seq1	435.00	339.62	13.00	1.58	1.10
comp128277_c0	comp128277_c0_seq1	409.00	313.63	12.00	1.58	1.10
comp128311_c0	comp128311_c0_seq1	385.00	289.64	12.00	1.71	1.19
comp128313_c0	comp128313_c0_seq1	808.00	712.56	32.00	1.85	1.29
comp128313_c1	comp128313_c1_seq1	657.00	561.57	6.00	0.44	0.31
comp128347_c0	comp128347_c0_seq1	620.00	524.58	18.00	1.41	0.99
comp128351_c0	comp128351_c0_seq1	614.00	518.58	24.00	1.91	1.33
comp128354_c0	comp128354_c0_seq1	714.00	618.57	25.00	1.66	1.16
comp128366_c0	comp128366_c0_seq1	310.00	214.68	5.00	0.96	0.67
comp128411_c0	comp128411_c0_seq1	339.00	243.67	9.00	1.52	1.06
comp128413_c0	comp128413_c0_seq1	389.00	293.64	11.00	1.54	1.08
comp128431_c0	comp128431_c0_seq1	595.00	499.58	25.00	2.06	1.44
comp128438_c0	comp128438_c0_seq1	845.00	749.56	32.00	1.76	1.23
comp128456_c0	comp128456_c0_seq1	1709.00	1613.56	57.00	1.45	1.02
comp12847_c0	comp12847_c0_seq1	558.00	462.59	10.00	0.89	0.62
comp128480_c0	comp128480_c0_seq1	384.00	288.64	4.00	0.57	0.40
comp128484_c0	comp128484_c0_seq1	390.00	294.64	13.00	1.82	1.27
comp1284_c0	comp1284_c0_seq1	1050.00	954.56	32.00	1.38	0.96
comp128510_c0	comp128510_c0_seq1	720.00	624.57	18.00	1.19	0.83
comp128519_c0	comp128519_c0_seq1	301.00	205.69	3.00	0.60	0.42
comp12851_c0	comp12851_c0_seq1	569.00	473.59	11.00	0.96	0.67
comp128554_c0	comp128554_c0_seq1	402.00	306.64	14.00	1.88	1.31
comp128570_c0	comp128570_c0_seq1	309.00	213.69	3.00	0.58	0.40
comp128594_c0	comp128594_c0_seq1	380.00	284.65	9.00	1.30	0.91
comp128625_c0	comp128625_c0_seq1	338.00	242.67	14.00	2.38	1.66
comp128626_c0	comp128626_c0_seq1	900.00	804.56	21.00	1.08	0.75
comp128628_c0	comp128628_c0_seq1	503.00	407.60	22.00	2.22	1.55
comp128629_c0	comp128629_c0_seq1	344.00	248.66	7.00	1.16	0.81
comp128632_c0	comp128632_c0_seq1	700.00	604.57	24.00	1.64	1.14
comp128633_c0	comp128633_c0_seq1	406.00	310.64	14.00	1.86	1.30
comp128635_c0	comp128635_c0_seq1	460.00	364.62	14.00	1.58	1.10
comp128636_c0	comp128636_c0_seq1	520.00	424.60	11.00	1.07	0.74
comp128637_c0	comp128637_c0_seq1	659.00	563.57	13.00	0.95	0.66
comp128639_c0	comp128639_c0_seq1	597.00	501.58	26.00	2.14	1.49
comp128653_c0	comp128653_c0_seq1	348.00	252.66	4.00	0.65	0.46
comp128656_c0	comp128656_c0_seq1	756.00	660.57	13.00	0.81	0.57
comp128661_c0	comp128661_c0_seq1	790.00	694.56	23.00	1.36	0.95
comp128678_c0	comp128678_c0_seq1	722.00	626.57	28.00	1.84	1.28
comp128698_c0	comp128698_c0_seq1	967.00	871.56	41.00	1.94	1.35
comp128704_c0	comp128704_c0_seq1	856.00	760.56	24.00	1.30	0.91
comp128709_c0	comp128709_c0_seq1	364.00	268.65	6.00	0.92	0.64
comp128710_c0	comp128710_c0_seq1	365.00	269.65	16.00	2.45	1.71
comp128735_c0	comp128735_c0_seq1	412.00	316.63	6.00	0.78	0.54
comp128740_c0	comp128740_c0_seq1	512.00	416.60	16.00	1.58	1.10
comp128747_c0	comp128747_c0_seq1	544.00	448.59	18.00	1.65	1.15
comp128762_c0	comp128762_c0_seq1	1255.00	1159.56	47.00	1.67	1.17
comp12876_c0	comp12876_c0_seq1	469.00	373.61	11.00	1.21	0.85
comp128783_c0	comp128783_c0_seq1	363.00	267.65	10.00	1.54	1.07
comp128784_c0	comp128784_c0_seq1	644.00	548.58	18.00	1.35	0.94
comp128785_c0	comp128785_c0_seq1	656.00	560.57	25.00	1.84	1.28
comp128790_c0	comp128790_c0_seq1	533.00	437.60	16.00	1.51	1.05
comp1287_c0	comp1287_c0_seq1	1215.00	1119.56	62.00	2.28	1.59
comp128800_c0	comp128800_c0_seq1	794.00	698.56	25.00	1.47	1.03
comp128834_c0	comp128834_c0_seq1	313.00	217.68	9.00	1.70	1.19
comp128839_c0	comp128839_c0_seq1	440.00	344.62	10.00	1.20	0.83
comp128852_c0	comp128852_c0_seq1	1034.00	938.56	37.00	1.62	1.13
comp128856_c0	comp128856_c0_seq1	3124.00	3028.56	103.00	1.40	0.98
comp128858_c0	comp128858_c0_seq1	737.00	641.57	23.00	1.48	1.03
comp128864_c0	comp128864_c0_seq1	713.00	617.57	26.00	1.73	1.21
comp128868_c0	comp128868_c0_seq1	350.00	254.66	10.00	1.62	1.13
comp128890_c0	comp128890_c0_seq1	1105.00	1009.56	34.00	1.39	0.97
comp128901_c0	comp128901_c0_seq1	736.00	640.57	21.00	1.35	0.94
comp128920_c0	comp128920_c0_seq1	338.00	242.67	5.00	0.85	0.59
comp128937_c0	comp128937_c0_seq1	423.00	327.63	11.00	1.38	0.97
comp128944_c0	comp128944_c0_seq1	563.00	467.59	17.00	1.50	1.05
comp128950_c0	comp128950_c0_seq1	348.00	252.66	15.00	2.45	1.71
comp128955_c0	comp128955_c0_seq1	741.00	645.57	24.00	1.53	1.07
comp128973_c0	comp128973_c0_seq1	690.00	594.57	22.00	1.52	1.06
comp12899_c0	comp12899_c0_seq1	310.00	214.68	1.00	0.19	0.13
comp1289_c0	comp1289_c0_seq1	465.00	369.61	25.00	2.79	1.95
comp129001_c0	comp129001_c0_seq1	781.00	685.56	19.39	1.16	0.81
comp129003_c0	comp129003_c0_seq1	683.00	587.57	25.00	1.75	1.22
comp129008_c0	comp129008_c0_seq1	606.00	510.58	25.00	2.02	1.41
comp129039_c0	comp129039_c0_seq1	757.00	661.57	32.00	1.99	1.39
comp129043_c0	comp129043_c0_seq1	612.00	516.58	8.00	0.64	0.45
comp129045_c0	comp129045_c0_seq1	339.00	243.67	17.00	2.88	2.01
comp129056_c0	comp129056_c0_seq1	455.00	359.62	22.00	2.52	1.76
comp129072_c0	comp129072_c0_seq1	348.00	252.66	10.00	1.63	1.14
comp12907_c0	comp12907_c0_seq1	325.00	229.68	3.00	0.54	0.38
comp129105_c0	comp129105_c0_seq1	1474.00	1378.56	62.00	1.85	1.29
comp129118_c0	comp129118_c0_seq1	353.00	257.66	6.00	0.96	0.67
comp129119_c0	comp129119_c0_seq1	448.00	352.62	12.00	1.40	0.98
comp12911_c0	comp12911_c0_seq1	313.00	217.68	2.00	0.38	0.26
comp129124_c0	comp129124_c0_seq1	673.00	577.57	22.00	1.57	1.10
comp12912_c0	comp12912_c0_seq1	685.00	589.57	31.00	2.17	1.51
comp129133_c0	comp129133_c0_seq1	729.00	633.57	22.00	1.43	1.00
comp129174_c0	comp129174_c0_seq1	439.00	343.62	16.00	1.92	1.34
comp129180_c0	comp129180_c0_seq1	721.00	625.57	23.00	1.51	1.06
comp1291_c0	comp1291_c0_seq1	1196.00	1100.56	58.00	2.17	1.51
comp129204_c0	comp129204_c0_seq1	771.00	675.56	25.00	1.52	1.06
comp129211_c0	comp129211_c0_seq1	725.00	629.57	27.00	1.77	1.23
comp129216_c0	comp129216_c0_seq1	436.00	340.62	12.00	1.45	1.01
comp129221_c0	comp129221_c0_seq1	683.00	587.57	18.00	1.26	0.88
comp129237_c0	comp129237_c0_seq1	637.00	541.58	17.00	1.29	0.90
comp129242_c0	comp129242_c0_seq1	422.00	326.63	7.00	0.88	0.62
comp129244_c0	comp129244_c0_seq1	340.00	244.67	5.00	0.84	0.59
comp129261_c0	comp129261_c0_seq1	354.00	258.66	9.00	1.43	1.00
comp12926_c0	comp12926_c0_seq1	308.00	212.69	1.00	0.19	0.14
comp129273_c0	comp129273_c0_seq1	621.00	525.58	25.00	1.96	1.37
comp129319_c0	comp129319_c0_seq1	407.00	311.64	14.00	1.85	1.29
comp129343_c0	comp129343_c0_seq1	1835.00	1739.56	77.00	1.82	1.27
comp129351_c0	comp129351_c0_seq1	427.00	331.63	13.00	1.62	1.13
comp129358_c0	comp129358_c0_seq1	399.00	303.64	9.00	1.22	0.85
comp129367_c0	comp129367_c0_seq1	347.00	251.66	7.00	1.15	0.80
comp129373_c0	comp129373_c0_seq1	334.00	238.67	8.00	1.38	0.96
comp129385_c0	comp129385_c0_seq1	424.00	328.63	5.00	0.63	0.44
comp12938_c0	comp12938_c0_seq1	335.00	239.67	4.00	0.69	0.48
comp129393_c0	comp129393_c0_seq1	388.00	292.64	11.00	1.55	1.08
comp129397_c0	comp129397_c0_seq1	958.00	862.56	30.00	1.43	1.00
comp129416_c0	comp129416_c0_seq1	1338.00	1242.56	49.00	1.62	1.13
comp129419_c0	comp129419_c0_seq1	540.00	444.60	18.00	1.67	1.16
comp129425_c0	comp129425_c0_seq1	1443.00	1347.56	36.00	1.10	0.77
comp129426_c0	comp129426_c0_seq1	673.00	577.57	17.00	1.21	0.85
comp129437_c0	comp129437_c0_seq1	389.00	293.64	9.00	1.26	0.88
comp129446_c0	comp129446_c0_seq1	1893.00	1797.56	65.00	1.49	1.04
comp12944_c0	comp12944_c0_seq1	476.00	380.61	7.00	0.76	0.53
comp129469_c0	comp129469_c0_seq1	1249.00	1153.56	42.00	1.50	1.05
comp129497_c0	comp129497_c0_seq1	572.00	476.59	22.00	1.90	1.33
comp129510_c0	comp129510_c0_seq1	323.00	227.68	11.00	1.99	1.39
comp129516_c0	comp129516_c0_seq1	461.00	365.62	8.00	0.90	0.63
comp129533_c0	comp129533_c0_seq1	583.00	487.59	21.00	1.77	1.24
comp129550_c0	comp129550_c0_seq1	1516.00	1420.56	37.00	1.07	0.75
comp129595_c0	comp129595_c0_seq1	1676.00	1580.56	63.00	1.64	1.15
comp129597_c0	comp129597_c0_seq1	313.00	217.68	7.00	1.33	0.93
comp12960_c0	comp12960_c0_seq1	864.00	768.56	18.00	0.96	0.67
comp129633_c0	comp129633_c0_seq1	1170.00	1074.56	40.00	1.53	1.07
comp129636_c0	comp129636_c0_seq1	2011.00	1915.56	59.00	1.27	0.89
comp129656_c0	comp129656_c0_seq1	622.00	526.58	23.00	1.80	1.26
comp12965_c0	comp12965_c0_seq1	399.00	303.64	12.00	1.63	1.14
comp129675_c0	comp129675_c0_seq1	347.00	251.66	5.00	0.82	0.57
comp129679_c0	comp129679_c0_seq1	379.00	283.65	8.00	1.16	0.81
comp12967_c0	comp12967_c0_seq1	334.00	238.67	10.00	1.73	1.21
comp129680_c0	comp129680_c0_seq1	494.00	398.61	14.00	1.45	1.01
comp1296_c0	comp1296_c0_seq1	592.00	496.58	30.00	2.49	1.74
comp12970_c0	comp12970_c0_seq1	310.00	214.68	7.00	1.34	0.94
comp129745_c0	comp129745_c0_seq1	514.00	418.60	10.00	0.98	0.69
comp12975_c0	comp12975_c0_seq1	793.00	697.56	13.00	0.77	0.54
comp129760_c0	comp129760_c0_seq1	941.00	845.56	29.00	1.41	0.99
comp129762_c0	comp129762_c0_seq1	557.00	461.59	15.00	1.34	0.93
comp129763_c0	comp129763_c0_seq1	516.00	420.60	14.00	1.37	0.96
comp129777_c0	comp129777_c0_seq1	428.00	332.63	16.00	1.98	1.38
comp129782_c0	comp129782_c0_seq1	307.00	211.69	5.00	0.97	0.68
comp129789_c0	comp129789_c0_seq1	1159.00	1063.56	47.00	1.82	1.27
comp129793_c0	comp129793_c0_seq1	1545.00	1449.56	39.00	1.11	0.77
comp12979_c0	comp12979_c0_seq1	435.00	339.62	8.00	0.97	0.68
comp1297_c0	comp1297_c0_seq1	1217.00	1121.56	50.00	1.84	1.28
comp129809_c0	comp129809_c0_seq1	336.00	240.67	1.00	0.17	0.12
comp129814_c0	comp129814_c0_seq1	392.00	296.64	9.00	1.25	0.87
comp129826_c0	comp129826_c0_seq1	314.00	218.68	11.00	2.07	1.45
comp129833_c0	comp129833_c0_seq1	472.00	376.61	13.00	1.42	0.99
comp129848_c0	comp129848_c0_seq1	333.00	237.67	10.00	1.73	1.21
comp129866_c0	comp129866_c0_seq1	691.00	595.57	29.00	2.01	1.40
comp12987_c0	comp12987_c0_seq1	450.00	354.62	7.00	0.81	0.57
comp129908_c0	comp129908_c0_seq1	1300.00	1204.56	43.00	1.47	1.03
comp129910_c0	comp129910_c0_seq1	539.00	443.60	21.00	1.95	1.36
comp129912_c0	comp129912_c0_seq1	373.00	277.65	12.00	1.78	1.24
comp129916_c0	comp129916_c0_seq1	302.00	206.69	12.00	2.39	1.67
comp129932_c0	comp129932_c0_seq1	376.00	280.65	14.00	2.06	1.43
comp129967_c0	comp129967_c0_seq1	1820.00	1724.56	69.00	1.65	1.15
comp129_c0	comp129_c0_seq1	385.00	289.64	6.00	0.85	0.60
comp13002_c0	comp13002_c0_seq1	982.00	886.56	29.00	1.35	0.94
comp130042_c0	comp130042_c0_seq1	635.00	539.58	23.00	1.76	1.23
comp130043_c0	comp130043_c0_seq1	1213.00	1117.56	45.00	1.66	1.16
comp130049_c0	comp130049_c0_seq1	941.00	845.56	29.00	1.41	0.99
comp130055_c0	comp130055_c0_seq1	442.00	346.62	14.00	1.66	1.16
comp130059_c0	comp130059_c0_seq1	378.00	282.65	20.00	2.92	2.04
comp130060_c0	comp130060_c0_seq1	349.00	253.66	14.00	2.27	1.59
comp130062_c0	comp130062_c0_seq1	448.00	352.62	14.00	1.64	1.14
comp130091_c0	comp130091_c0_seq1	306.00	210.69	4.00	0.78	0.55
comp1300_c0	comp1300_c0_seq1	497.00	401.61	23.00	2.36	1.65
comp130105_c0	comp130105_c0_seq1	317.00	221.68	7.00	1.30	0.91
comp13010_c0	comp13010_c0_seq1	326.00	230.67	3.00	0.54	0.37
comp130114_c0	comp130114_c0_seq1	409.00	313.63	7.00	0.92	0.64
comp130126_c0	comp130126_c0_seq1	573.00	477.59	27.00	2.33	1.63
comp130132_c0	comp130132_c0_seq1	553.00	457.59	14.00	1.26	0.88
comp130137_c0	comp130137_c0_seq1	446.00	350.62	15.00	1.76	1.23
comp13013_c0	comp13013_c0_seq1	348.00	252.66	2.00	0.33	0.23
comp130157_c0	comp130157_c0_seq1	504.00	408.60	14.00	1.41	0.99
comp13016_c0	comp13016_c0_seq1	774.00	678.56	17.00	1.03	0.72
comp1301_c0	comp1301_c0_seq1	971.00	875.56	42.00	1.98	1.38
comp130203_c0	comp130203_c0_seq1	1248.00	1152.56	40.00	1.43	1.00
comp130223_c0	comp130223_c0_seq1	507.00	411.60	10.00	1.00	0.70
comp130235_c0	comp130235_c0_seq1	677.00	581.57	26.00	1.84	1.29
comp130266_c0	comp130266_c0_seq1	883.00	787.56	30.00	1.57	1.10
comp130298_c0	comp130298_c0_seq1	753.00	657.57	21.00	1.32	0.92
comp1302_c0	comp1302_c0_seq1	374.00	278.65	13.00	1.92	1.34
comp13034_c0	comp13034_c0_seq1	422.00	326.63	6.00	0.76	0.53
comp130361_c0	comp130361_c0_seq1	386.00	290.64	3.00	0.43	0.30
comp130386_c0	comp130386_c0_seq1	717.00	621.57	24.00	1.59	1.11
comp130394_c0	comp130394_c0_seq1	368.00	272.65	10.00	1.51	1.05
comp130436_c0	comp130436_c0_seq1	1841.00	1745.56	54.00	1.27	0.89
comp130477_c0	comp130477_c0_seq1	328.00	232.67	5.00	0.89	0.62
comp130478_c0	comp130478_c0_seq1	554.00	458.59	19.00	1.71	1.19
comp130481_c0	comp130481_c0_seq1	949.00	853.56	35.98	1.74	1.21
comp1304_c0	comp1304_c0_seq1,comp1304_c0_seq2	714.59	619.16	59.00	3.93	2.74
comp130515_c0	comp130515_c0_seq1	513.00	417.60	13.00	1.28	0.90
comp130516_c0	comp130516_c0_seq1	712.00	616.57	22.00	1.47	1.03
comp1305_c0	comp1305_c0_seq1	480.00	384.61	5.00	0.54	0.37
comp130604_c0	comp130604_c0_seq1	301.00	205.69	4.00	0.80	0.56
comp130613_c0	comp130613_c0_seq1	434.00	338.63	9.00	1.10	0.76
comp130629_c0	comp130629_c0_seq1	489.00	393.61	15.00	1.57	1.10
comp130693_c0	comp130693_c0_seq1	480.00	384.61	15.00	1.61	1.12
comp130748_c0	comp130748_c0_seq1	357.00	261.66	10.00	1.58	1.10
comp130798_c0	comp130798_c0_seq1	1177.00	1081.56	35.00	1.33	0.93
comp130811_c0	comp130811_c0_seq1	855.00	759.56	27.00	1.46	1.02
comp130814_c0	comp130814_c0_seq1	344.00	248.66	3.00	0.50	0.35
comp13083_c0	comp13083_c0_seq1	310.00	214.68	2.00	0.38	0.27
comp130851_c0	comp130851_c0_seq1	1393.00	1297.56	40.00	1.27	0.89
comp130893_c0	comp130893_c0_seq1	361.00	265.66	8.00	1.24	0.87
comp1308_c0	comp1308_c0_seq1	522.00	426.60	26.00	2.51	1.75
comp13090_c0	comp13090_c0_seq1	598.00	502.58	18.00	1.48	1.03
comp13096_c0	comp13096_c0_seq1	618.00	522.58	11.00	0.87	0.61
comp130987_c0	comp130987_c0_seq1	350.00	254.66	5.00	0.81	0.56
comp130990_c0	comp130990_c0_seq1	1090.00	994.56	34.00	1.41	0.98
comp130999_c0	comp130999_c0_seq1	486.00	390.61	18.00	1.90	1.33
comp1309_c0	comp1309_c0_seq1	309.00	213.69	4.00	0.77	0.54
comp131009_c0	comp131009_c0_seq1	434.00	338.63	5.00	0.61	0.42
comp13102_c0	comp13102_c0_seq1	876.00	780.56	24.00	1.27	0.88
comp131041_c0	comp131041_c0_seq1	614.00	518.58	30.00	2.38	1.66
comp131057_c0	comp131057_c0_seq1	637.00	541.58	30.00	2.28	1.59
comp131069_c0	comp131069_c0_seq1	390.00	294.64	8.00	1.12	0.78
comp131075_c0	comp131075_c0_seq1	511.00	415.60	18.00	1.78	1.25
comp13110_c0	comp13110_c0_seq1	478.00	382.61	8.00	0.86	0.60
comp13111_c0	comp13111_c0_seq1	475.00	379.61	7.00	0.76	0.53
comp131143_c0	comp131143_c0_seq1	561.00	465.59	11.00	0.97	0.68
comp131144_c0	comp131144_c0_seq1	341.00	245.67	7.00	1.17	0.82
comp131197_c0	comp131197_c0_seq1	738.00	642.57	19.00	1.22	0.85
comp131225_c0	comp131225_c0_seq1	647.00	551.58	18.00	1.34	0.94
comp13122_c0	comp13122_c0_seq1	371.00	275.65	1.00	0.15	0.10
comp131253_c0	comp131253_c0_seq1	359.00	263.66	6.00	0.94	0.65
comp131284_c0	comp131284_c0_seq1	734.00	638.57	13.00	0.84	0.59
comp1312_c0	comp1312_c0_seq1	726.00	630.57	18.00	1.18	0.82
comp1312_c1	comp1312_c1_seq1	683.00	587.57	22.00	1.54	1.08
comp131323_c0	comp131323_c0_seq1	515.00	419.60	8.00	0.79	0.55
comp131330_c0	comp131330_c0_seq1	379.00	283.65	14.00	2.03	1.42
comp13135_c0	comp13135_c0_seq1	406.00	310.64	4.00	0.53	0.37
comp131366_c0	comp131366_c0_seq1	854.00	758.56	28.00	1.52	1.06
comp1313_c0	comp1313_c0_seq1	679.00	583.57	40.00	2.82	1.97
comp1313_c1	comp1313_c1_seq1	2135.00	2039.56	104.00	2.10	1.47
comp131413_c0	comp131413_c0_seq1	543.00	447.59	12.00	1.10	0.77
comp131415_c0	comp131415_c0_seq1	2534.00	2438.56	97.00	1.64	1.14
comp13143_c0	comp13143_c0_seq1	327.00	231.67	8.00	1.42	0.99
comp131484_c0	comp131484_c0_seq1	378.00	282.65	14.00	2.04	1.42
comp13151_c0	comp13151_c0_seq1	309.00	213.69	7.00	1.35	0.94
comp131524_c0	comp131524_c0_seq1	415.00	319.63	7.00	0.90	0.63
comp13155_c0	comp13155_c0_seq1	366.00	270.65	4.00	0.61	0.43
comp131587_c0	comp131587_c0_seq1	690.00	594.57	23.00	1.59	1.11
comp13159_c0	comp13159_c0_seq1	1001.00	905.56	30.00	1.36	0.95
comp1315_c0	comp1315_c0_seq1	446.00	350.62	13.00	1.53	1.07
comp131608_c0	comp131608_c0_seq1	401.00	305.64	4.00	0.54	0.38
comp131620_c0	comp131620_c0_seq1	513.00	417.60	13.00	1.28	0.90
comp131637_c0	comp131637_c0_seq1	1253.00	1157.56	36.01	1.28	0.89
comp131686_c0	comp131686_c0_seq1	963.00	867.56	32.00	1.52	1.06
comp131690_c0	comp131690_c0_seq1	436.00	340.62	10.00	1.21	0.84
comp1316_c0	comp1316_c0_seq1	449.00	353.62	20.00	2.33	1.63
comp131718_c0	comp131718_c0_seq1	345.00	249.66	6.00	0.99	0.69
comp131753_c0	comp131753_c0_seq1	566.00	470.59	17.00	1.49	1.04
comp131825_c0	comp131825_c0_seq1	704.00	608.57	22.00	1.49	1.04
comp13182_c0	comp13182_c0_seq1	720.00	624.57	14.00	0.92	0.64
comp131889_c0	comp131889_c0_seq1	885.00	789.56	27.00	1.41	0.98
comp1318_c0	comp1318_c0_seq1	404.00	308.64	8.00	1.07	0.75
comp131912_c0	comp131912_c0_seq1	364.00	268.65	14.00	2.15	1.50
comp131924_c0	comp131924_c0_seq1	590.00	494.59	6.00	0.50	0.35
comp131947_c0	comp131947_c0_seq1	427.00	331.63	9.00	1.12	0.78
comp13195_c0	comp13195_c0_seq1	367.00	271.65	7.00	1.06	0.74
comp131967_c0	comp131967_c0_seq1	597.00	501.58	14.00	1.15	0.80
comp131980_c0	comp131980_c0_seq1	337.00	241.67	4.00	0.68	0.48
comp132009_c0	comp132009_c0_seq1	386.00	290.64	9.00	1.28	0.89
comp132026_c0	comp132026_c0_seq1	341.00	245.67	8.00	1.34	0.94
comp132052_c0	comp132052_c0_seq1	579.00	483.59	18.00	1.53	1.07
comp132054_c0	comp132054_c0_seq1	655.00	559.57	23.00	1.69	1.18
comp132061_c0	comp132061_c0_seq1	336.00	240.67	12.00	2.05	1.43
comp132097_c0	comp132097_c0_seq1	309.00	213.69	2.00	0.39	0.27
comp1320_c0	comp1320_c0_seq1	541.00	445.59	22.01	2.03	1.42
comp132126_c0	comp132126_c0_seq1	441.00	345.62	9.00	1.07	0.75
comp13213_c0	comp13213_c0_seq1	312.00	216.68	2.00	0.38	0.27
comp1321_c0	comp1321_c0_seq1	837.00	741.56	39.00	2.17	1.51
comp132245_c0	comp132245_c0_seq1	440.00	344.62	11.00	1.32	0.92
comp132248_c0	comp132248_c0_seq1	395.00	299.64	8.00	1.10	0.77
comp13234_c0	comp13234_c0_seq1	335.00	239.67	7.00	1.20	0.84
comp1323_c0	comp1323_c0_seq1	1434.00	1338.56	93.00	2.86	2.00
comp13241_c0	comp13241_c0_seq1	392.00	296.64	8.00	1.11	0.78
comp13249_c0	comp13249_c0_seq1	729.00	633.57	18.00	1.17	0.82
comp1324_c0	comp1324_c0_seq1	532.00	436.60	10.00	0.94	0.66
comp132521_c0	comp132521_c0_seq1	908.00	812.56	27.00	1.37	0.96
comp13252_c0	comp13252_c0_seq1	565.00	469.59	13.00	1.14	0.80
comp132539_c0	comp132539_c0_seq1	1944.00	1848.56	52.12	1.16	0.81
comp132646_c0	comp132646_c0_seq1	364.00	268.65	8.00	1.23	0.86
comp13269_c0	comp13269_c0_seq1	490.00	394.61	11.00	1.15	0.80
comp132761_c0	comp132761_c0_seq1	2360.00	2264.56	74.00	1.35	0.94
comp132788_c0	comp132788_c0_seq1	675.00	579.57	17.00	1.21	0.84
comp132809_c0	comp132809_c0_seq1	440.00	344.62	16.00	1.91	1.34
comp132816_c0	comp132816_c0_seq1	469.00	373.61	14.00	1.54	1.08
comp13281_c0	comp13281_c0_seq1	337.00	241.67	3.00	0.51	0.36
comp132823_c0	comp132823_c0_seq1	432.00	336.63	3.00	0.37	0.26
comp132834_c0	comp132834_c0_seq1	316.00	220.68	7.00	1.31	0.91
comp132845_c0	comp132845_c0_seq1	354.00	258.66	9.00	1.43	1.00
comp132888_c0	comp132888_c0_seq1	461.00	365.62	2.00	0.23	0.16
comp132956_c0	comp132956_c0_seq1	509.00	413.60	13.00	1.29	0.90
comp13295_c0	comp13295_c0_seq1	821.00	725.56	23.00	1.31	0.91
comp13298_c0	comp13298_c0_seq1	507.00	411.60	9.00	0.90	0.63
comp132_c0	comp132_c0_seq1	344.00	248.66	2.00	0.33	0.23
comp132_c1	comp132_c1_seq1	314.00	218.68	2.00	0.38	0.26
comp133032_c0	comp133032_c0_seq1	523.00	427.60	12.00	1.16	0.81
comp133038_c0	comp133038_c0_seq1	726.00	630.57	24.00	1.57	1.09
comp133065_c0	comp133065_c0_seq1	1011.00	915.56	29.00	1.30	0.91
comp133071_c0	comp133071_c0_seq1	1688.00	1592.56	43.00	1.11	0.78
comp133080_c0	comp133080_c0_seq1	416.00	320.63	9.00	1.16	0.81
comp133158_c0	comp133158_c0_seq1	858.00	762.56	25.00	1.35	0.94
comp133245_c0	comp133245_c0_seq1	611.00	515.58	19.00	1.52	1.06
comp133321_c0	comp133321_c0_seq1	357.00	261.66	2.00	0.32	0.22
comp133339_c0	comp133339_c0_seq1	390.00	294.64	9.00	1.26	0.88
comp13337_c0	comp13337_c0_seq1	391.00	295.64	7.00	0.98	0.68
comp133382_c0	comp133382_c0_seq1	582.00	486.59	19.00	1.61	1.12
comp133398_c0	comp133398_c0_seq1	673.00	577.57	24.00	1.71	1.19
comp1333_c0	comp1333_c0_seq1	565.00	469.59	33.00	2.90	2.02
comp13341_c0	comp13341_c0_seq1	321.00	225.68	6.00	1.10	0.76
comp133482_c0	comp133482_c0_seq1	563.00	467.59	15.00	1.32	0.92
comp133496_c0	comp133496_c0_seq1	658.00	562.57	21.00	1.54	1.07
comp1334_c0	comp1334_c0_seq1	1776.00	1680.56	78.00	1.91	1.33
comp133512_c0	comp133512_c0_seq1	510.00	414.60	16.00	1.59	1.11
comp133570_c0	comp133570_c0_seq1	643.00	547.58	25.00	1.88	1.31
comp133582_c0	comp133582_c0_seq1	387.00	291.64	4.00	0.57	0.39
comp133589_c0	comp133589_c0_seq1	698.00	602.57	18.00	1.23	0.86
comp133676_c0	comp133676_c0_seq1	548.00	452.59	22.00	2.00	1.40
comp1336_c0	comp1336_c0_seq1	442.00	346.62	4.00	0.48	0.33
comp1336_c1	comp1336_c1_seq1	463.00	367.62	13.00	1.46	1.02
comp133727_c0	comp133727_c0_seq1	856.00	760.56	20.00	1.08	0.76
comp133840_c0	comp133840_c0_seq1	385.00	289.64	11.00	1.57	1.09
comp133908_c0	comp133908_c0_seq1	549.00	453.59	14.00	1.27	0.89
comp133909_c0	comp133909_c0_seq1	567.00	471.59	8.00	0.70	0.49
comp133936_c0	comp133936_c0_seq1	498.00	402.61	14.00	1.43	1.00
comp133940_c0	comp133940_c0_seq1	456.00	360.62	8.00	0.91	0.64
comp133942_c0	comp133942_c0_seq1	381.00	285.65	8.00	1.15	0.81
comp133954_c0	comp133954_c0_seq1	463.00	367.62	15.00	1.68	1.17
comp133958_c0	comp133958_c0_seq1	378.00	282.65	12.00	1.75	1.22
comp133959_c0	comp133959_c0_seq1	1456.00	1360.56	50.00	1.51	1.06
comp133974_c0	comp133974_c0_seq1	541.00	445.59	13.00	1.20	0.84
comp133982_c0	comp133982_c0_seq1	447.00	351.62	12.00	1.41	0.98
comp133986_c0	comp133986_c0_seq1	349.00	253.66	2.00	0.32	0.23
comp134012_c0	comp134012_c0_seq1	379.00	283.65	11.00	1.60	1.12
comp134022_c0	comp134022_c0_seq1	549.00	453.59	19.00	1.73	1.20
comp134031_c0	comp134031_c0_seq1	586.00	490.59	14.00	1.18	0.82
comp134032_c0	comp134032_c0_seq1	500.00	404.60	15.00	1.53	1.07
comp134035_c0	comp134035_c0_seq1	444.00	348.62	10.00	1.18	0.82
comp134049_c0	comp134049_c0_seq1	562.00	466.59	19.00	1.68	1.17
comp134053_c0	comp134053_c0_seq1	447.00	351.62	14.00	1.64	1.15
comp134055_c0	comp134055_c0_seq1	376.00	280.65	8.00	1.17	0.82
comp134077_c0	comp134077_c0_seq1	321.00	225.68	7.00	1.28	0.89
comp134093_c0	comp134093_c0_seq1	933.00	837.56	31.00	1.52	1.06
comp134094_c0	comp134094_c0_seq1	387.00	291.64	15.00	2.12	1.48
comp13409_c0	comp13409_c0_seq1	331.00	235.67	4.00	0.70	0.49
comp134106_c0	comp134106_c0_seq1	750.00	654.57	34.00	2.14	1.49
comp134108_c0	comp134108_c0_seq1	301.00	205.69	3.00	0.60	0.42
comp134111_c0	comp134111_c0_seq1	621.00	525.58	6.00	0.47	0.33
comp134123_c0	comp134123_c0_seq1	617.00	521.58	15.00	1.18	0.83
comp134141_c0	comp134141_c0_seq1	302.00	206.69	3.00	0.60	0.42
comp134148_c0	comp134148_c0_seq1	464.00	368.62	8.00	0.89	0.62
comp134152_c0	comp134152_c0_seq1	439.00	343.62	12.00	1.44	1.00
comp134164_c0	comp134164_c0_seq1	898.00	802.56	20.00	1.03	0.72
comp134165_c0	comp134165_c0_seq1	320.00	224.68	11.00	2.02	1.41
comp134169_c0	comp134169_c0_seq1	359.00	263.66	6.00	0.94	0.65
comp134174_c0	comp134174_c0_seq1	413.00	317.63	14.00	1.82	1.27
comp134180_c0	comp134180_c0_seq1	342.00	246.67	8.00	1.34	0.93
comp134194_c0	comp134194_c0_seq1	502.00	406.60	13.00	1.32	0.92
comp13420_c0	comp13420_c0_seq1	310.00	214.68	7.00	1.34	0.94
comp134216_c0	comp134216_c0_seq1	705.00	609.57	22.00	1.49	1.04
comp134226_c0	comp134226_c0_seq1	498.00	402.61	13.00	1.33	0.93
comp134232_c0	comp134232_c0_seq1	353.00	257.66	5.00	0.80	0.56
comp134239_c0	comp134239_c0_seq1	390.00	294.64	9.00	1.26	0.88
comp134241_c0	comp134241_c0_seq1	389.00	293.64	6.00	0.84	0.59
comp134249_c0	comp134249_c0_seq1	385.00	289.64	7.00	1.00	0.70
comp134258_c0	comp134258_c0_seq1	477.00	381.61	9.00	0.97	0.68
comp13425_c0	comp13425_c0_seq1	550.00	454.59	9.00	0.82	0.57
comp134262_c0	comp134262_c0_seq1	960.00	864.56	31.00	1.48	1.03
comp134272_c0	comp134272_c0_seq1	726.00	630.57	27.00	1.76	1.23
comp134273_c0	comp134273_c0_seq1	305.00	209.69	2.00	0.39	0.27
comp134275_c0	comp134275_c0_seq1	662.00	566.57	8.00	0.58	0.41
comp134277_c0	comp134277_c0_seq1	709.00	613.57	33.00	2.22	1.55
comp134278_c0	comp134278_c0_seq1	455.00	359.62	6.00	0.69	0.48
comp134293_c0	comp134293_c0_seq1	1178.00	1082.56	41.00	1.56	1.09
comp134316_c0	comp134316_c0_seq1	382.00	286.65	10.00	1.44	1.00
comp134318_c0	comp134318_c0_seq1	322.00	226.68	9.00	1.64	1.14
comp134322_c0	comp134322_c0_seq1	934.00	838.56	28.00	1.38	0.96
comp134325_c0	comp134325_c0_seq1	506.00	410.60	14.00	1.40	0.98
comp134329_c0	comp134329_c0_seq1	461.00	365.62	14.00	1.58	1.10
comp134339_c0	comp134339_c0_seq1	445.00	349.62	6.00	0.71	0.49
comp134345_c0	comp134345_c0_seq1	542.00	446.59	13.00	1.20	0.84
comp134373_c0	comp134373_c0_seq1	1775.00	1679.56	44.00	1.08	0.75
comp134380_c0	comp134380_c0_seq1	302.00	206.69	2.00	0.40	0.28
comp134393_c0	comp134393_c0_seq1	525.00	429.60	16.00	1.53	1.07
comp134395_c0	comp134395_c0_seq1	480.00	384.61	6.00	0.64	0.45
comp1343_c0	comp1343_c0_seq1	568.00	472.59	16.00	1.39	0.97
comp134404_c0	comp134404_c0_seq1	900.00	804.56	21.00	1.08	0.75
comp134423_c0	comp134423_c0_seq1	491.00	395.61	16.00	1.67	1.16
comp134424_c0	comp134424_c0_seq1	877.00	781.56	27.00	1.42	0.99
comp134428_c0	comp134428_c0_seq1	316.00	220.68	6.00	1.12	0.78
comp134432_c0	comp134432_c0_seq1	509.00	413.60	13.00	1.29	0.90
comp134436_c0	comp134436_c0_seq1	529.00	433.60	13.00	1.24	0.86
comp134453_c0	comp134453_c0_seq1	795.00	699.56	27.00	1.59	1.11
comp134454_c0	comp134454_c0_seq1	451.00	355.62	11.00	1.27	0.89
comp134460_c0	comp134460_c0_seq1	607.00	511.58	14.00	1.13	0.79
comp134464_c0	comp134464_c0_seq1	435.00	339.62	12.00	1.46	1.02
comp134468_c0	comp134468_c0_seq1	686.00	590.57	21.00	1.46	1.02
comp134481_c0	comp134481_c0_seq1	419.00	323.63	11.00	1.40	0.98
comp134486_c0	comp134486_c0_seq1	333.00	237.67	10.00	1.73	1.21
comp134490_c0	comp134490_c0_seq1	452.00	356.62	14.00	1.62	1.13
comp1344_c0	comp1344_c0_seq1	638.00	542.58	26.00	1.97	1.38
comp134504_c0	comp134504_c0_seq1	890.00	794.56	33.00	1.71	1.19
comp134513_c0	comp134513_c0_seq1	516.00	420.60	12.00	1.18	0.82
comp134528_c0	comp134528_c0_seq1	830.00	734.56	30.00	1.68	1.17
comp13453_c0	comp13453_c0_seq1	1048.00	952.56	22.00	0.95	0.66
comp134554_c0	comp134554_c0_seq1	1139.00	1043.56	39.00	1.54	1.07
comp134573_c0	comp134573_c0_seq1	349.00	253.66	5.00	0.81	0.57
comp134574_c0	comp134574_c0_seq1	478.00	382.61	13.00	1.40	0.98
comp134576_c0	comp134576_c0_seq1	435.00	339.62	15.00	1.82	1.27
comp134591_c0	comp134591_c0_seq1	1013.00	917.56	29.00	1.30	0.91
comp134607_c0	comp134607_c0_seq1	334.00	238.67	10.00	1.73	1.21
comp134609_c0	comp134609_c0_seq1	647.00	551.58	19.00	1.42	0.99
comp134616_c0	comp134616_c0_seq1	624.00	528.58	8.00	0.62	0.44
comp134618_c0	comp134618_c0_seq1	331.00	235.67	10.00	1.75	1.22
comp134628_c0	comp134628_c0_seq1	453.00	357.62	11.00	1.27	0.88
comp134631_c0	comp134631_c0_seq1	352.00	256.66	9.00	1.45	1.01
comp134656_c0	comp134656_c0_seq1	467.00	371.61	11.00	1.22	0.85
comp13465_c0	comp13465_c0_seq1	1281.00	1185.56	27.00	0.94	0.65
comp134661_c0	comp134661_c0_seq1	390.00	294.64	10.00	1.40	0.98
comp134662_c0	comp134662_c0_seq1	372.00	276.65	9.00	1.34	0.94
comp134669_c0	comp134669_c0_seq1	330.00	234.67	4.00	0.70	0.49
comp134674_c0	comp134674_c0_seq1	381.00	285.65	13.00	1.88	1.31
comp134686_c0	comp134686_c0_seq1	455.00	359.62	4.00	0.46	0.32
comp134708_c0	comp134708_c0_seq1	472.00	376.61	5.00	0.55	0.38
comp134728_c0	comp134728_c0_seq1	504.00	408.60	13.00	1.31	0.91
comp13474_c0	comp13474_c0_seq1	349.00	253.66	9.00	1.46	1.02
comp134754_c0	comp134754_c0_seq1	1413.00	1317.56	40.00	1.25	0.87
comp134765_c0	comp134765_c0_seq1	838.00	742.56	31.00	1.72	1.20
comp134770_c0	comp134770_c0_seq1	549.00	453.59	14.00	1.27	0.89
comp134775_c0	comp134775_c0_seq1	330.00	234.67	6.00	1.05	0.74
comp134780_c0	comp134780_c0_seq1	353.00	257.66	11.00	1.76	1.23
comp134781_c0	comp134781_c0_seq1	471.00	375.61	8.00	0.88	0.61
comp134783_c0	comp134783_c0_seq1	871.00	775.56	29.00	1.54	1.07
comp134796_c0	comp134796_c0_seq1	491.00	395.61	15.00	1.56	1.09
comp1347_c0	comp1347_c0_seq1	309.00	213.69	10.00	1.93	1.35
comp134806_c0	comp134806_c0_seq1	611.00	515.58	16.00	1.28	0.89
comp134824_c0	comp134824_c0_seq1	560.00	464.59	12.00	1.06	0.74
comp13485_c0	comp13485_c0_seq1	641.00	545.58	10.00	0.76	0.53
comp134860_c0	comp134860_c0_seq1	434.00	338.63	7.00	0.85	0.59
comp134880_c0	comp134880_c0_seq1	1137.00	1041.56	41.00	1.62	1.13
comp134897_c0	comp134897_c0_seq1	661.00	565.57	15.00	1.09	0.76
comp134904_c0	comp134904_c0_seq1	447.00	351.62	14.00	1.64	1.15
comp134922_c0	comp134922_c0_seq1	424.00	328.63	16.00	2.01	1.40
comp134929_c0	comp134929_c0_seq1	587.00	491.59	14.00	1.17	0.82
comp134940_c0	comp134940_c0_seq1	1307.00	1211.56	36.00	1.22	0.85
comp134945_c0	comp134945_c0_seq1	1138.00	1042.56	35.00	1.38	0.96
comp134956_c0	comp134956_c0_seq1	888.00	792.56	39.00	2.03	1.41
comp134992_c0	comp134992_c0_seq1	371.00	275.65	3.00	0.45	0.31
comp1349_c0	comp1349_c0_seq1	338.00	242.67	6.00	1.02	0.71
comp135003_c0	comp135003_c0_seq1	529.00	433.60	12.00	1.14	0.80
comp135019_c0	comp135019_c0_seq1	364.00	268.65	3.00	0.46	0.32
comp135020_c0	comp135020_c0_seq1	365.00	269.65	7.00	1.07	0.75
comp135023_c0	comp135023_c0_seq1	1737.00	1641.56	54.00	1.35	0.95
comp135032_c0	comp135032_c0_seq1	307.00	211.69	1.00	0.19	0.14
comp135044_c0	comp135044_c0_seq1	383.00	287.65	11.00	1.58	1.10
comp135046_c0	comp135046_c0_seq1	376.00	280.65	13.00	1.91	1.33
comp135049_c0	comp135049_c0_seq1	372.00	276.65	7.00	1.04	0.73
comp135063_c0	comp135063_c0_seq1	387.00	291.64	12.00	1.70	1.18
comp135075_c0	comp135075_c0_seq1	464.00	368.62	17.00	1.90	1.33
comp13507_c0	comp13507_c0_seq1	312.00	216.68	3.00	0.57	0.40
comp135095_c0	comp135095_c0_seq1	790.00	694.56	16.00	0.95	0.66
comp135129_c0	comp135129_c0_seq1	387.00	291.64	10.00	1.41	0.99
comp135170_c0	comp135170_c0_seq1	1074.00	978.56	42.00	1.77	1.23
comp135172_c0	comp135172_c0_seq1	304.00	208.69	4.00	0.79	0.55
comp135182_c0	comp135182_c0_seq1	510.00	414.60	8.00	0.79	0.55
comp135204_c0	comp135204_c0_seq1	449.00	353.62	11.00	1.28	0.89
comp135211_c0	comp135211_c0_seq1	351.00	255.66	8.00	1.29	0.90
comp135219_c0	comp135219_c0_seq1	904.00	808.56	28.00	1.43	1.00
comp135220_c0	comp135220_c0_seq1	438.00	342.62	12.00	1.44	1.01
comp135223_c0	comp135223_c0_seq1	1931.00	1835.56	59.00	1.32	0.92
comp135224_c0	comp135224_c0_seq1	507.00	411.60	16.00	1.60	1.12
comp13523_c0	comp13523_c0_seq1	312.00	216.68	1.00	0.19	0.13
comp135242_c0	comp135242_c0_seq1	620.00	524.58	9.00	0.71	0.49
comp135258_c0	comp135258_c0_seq1	585.00	489.59	16.00	1.35	0.94
comp135272_c0	comp135272_c0_seq1	715.00	619.57	17.00	1.13	0.79
comp135299_c0	comp135299_c0_seq1	332.00	236.67	6.00	1.04	0.73
comp135307_c0	comp135307_c0_seq1	473.00	377.61	11.00	1.20	0.84
comp135315_c0	comp135315_c0_seq1	398.00	302.64	10.00	1.36	0.95
comp135327_c0	comp135327_c0_seq1	392.00	296.64	10.00	1.39	0.97
comp135337_c0	comp135337_c0_seq1	1592.00	1496.56	48.00	1.32	0.92
comp135358_c0	comp135358_c0_seq1	849.00	753.56	34.00	1.86	1.30
comp135359_c0	comp135359_c0_seq1	590.00	494.59	20.00	1.67	1.16
comp135397_c0	comp135397_c0_seq1	383.00	287.65	8.00	1.15	0.80
comp135439_c0	comp135439_c0_seq1	413.00	317.63	14.00	1.82	1.27
comp135448_c0	comp135448_c0_seq1	597.00	501.58	18.00	1.48	1.03
comp135451_c0	comp135451_c0_seq1	376.00	280.65	9.00	1.32	0.92
comp135495_c0	comp135495_c0_seq1	610.00	514.58	19.00	1.52	1.06
comp1354_c0	comp1354_c0_seq1	467.00	371.61	13.00	1.44	1.01
comp135522_c0	comp135522_c0_seq1	321.00	225.68	6.00	1.10	0.76
comp135529_c0	comp135529_c0_seq1	414.00	318.63	13.00	1.68	1.17
comp135533_c0	comp135533_c0_seq1	415.00	319.63	10.00	1.29	0.90
comp135542_c0	comp135542_c0_seq1	1145.00	1049.56	41.00	1.61	1.12
comp135548_c0	comp135548_c0_seq1	2245.00	2149.56	95.00	1.82	1.27
comp135550_c0	comp135550_c0_seq1	830.00	734.56	21.99	1.23	0.86
comp135557_c0	comp135557_c0_seq1	656.00	560.57	19.00	1.40	0.97
comp13555_c0	comp13555_c0_seq1	978.00	882.56	19.00	0.89	0.62
comp135561_c0	comp135561_c0_seq1	329.00	233.67	7.00	1.23	0.86
comp13559_c0	comp13559_c0_seq1	339.00	243.67	4.00	0.68	0.47
comp1355_c0	comp1355_c0_seq1	407.00	311.64	17.00	2.25	1.57
comp135631_c0	comp135631_c0_seq1	536.00	440.60	15.00	1.40	0.98
comp135646_c0	comp135646_c0_seq1	306.00	210.69	7.00	1.37	0.96
comp13565_c0	comp13565_c0_seq1	560.00	464.59	5.00	0.44	0.31
comp135671_c0	comp135671_c0_seq1	1212.00	1116.56	42.00	1.55	1.08
comp135674_c0	comp135674_c0_seq1	756.00	660.57	24.00	1.50	1.04
comp135704_c0	comp135704_c0_seq1	394.00	298.64	9.00	1.24	0.87
comp135705_c0	comp135705_c0_seq1	303.00	207.69	2.00	0.40	0.28
comp135735_c0	comp135735_c0_seq1	380.00	284.65	10.00	1.45	1.01
comp135741_c0	comp135741_c0_seq1	362.00	266.65	6.00	0.93	0.65
comp135757_c0	comp135757_c0_seq1	871.00	775.56	30.00	1.59	1.11
comp135792_c0	comp135792_c0_seq1	1128.00	1032.56	29.00	1.16	0.81
comp1357_c0	comp1357_c0_seq1	1481.00	1385.56	61.00	1.81	1.27
comp135804_c0	comp135804_c0_seq1	894.00	798.56	25.00	1.29	0.90
comp135815_c0	comp135815_c0_seq1	398.00	302.64	11.00	1.50	1.05
comp135818_c0	comp135818_c0_seq1	463.00	367.62	17.00	1.91	1.33
comp135823_c0	comp135823_c0_seq1	403.00	307.64	2.00	0.27	0.19
comp135861_c0	comp135861_c0_seq1	480.00	384.61	9.00	0.96	0.67
comp135895_c0	comp135895_c0_seq1	328.00	232.67	8.00	1.42	0.99
comp1358_c0	comp1358_c0_seq1	1447.00	1351.56	76.00	2.32	1.62
comp135912_c0	comp135912_c0_seq1	581.00	485.59	15.00	1.27	0.89
comp135922_c0	comp135922_c0_seq1	565.00	469.59	13.00	1.14	0.80
comp135939_c0	comp135939_c0_seq1	631.00	535.58	15.00	1.15	0.81
comp135967_c0	comp135967_c0_seq1	343.00	247.66	4.00	0.67	0.46
comp135969_c0	comp135969_c0_seq1	474.00	378.61	14.00	1.52	1.06
comp13598_c0	comp13598_c0_seq1	366.00	270.65	6.00	0.91	0.64
comp135_c0	comp135_c0_seq1	495.00	399.61	13.00	1.34	0.94
comp135_c1	comp135_c1_seq1	443.00	347.62	9.00	1.07	0.74
comp136020_c0	comp136020_c0_seq1	504.00	408.60	8.00	0.81	0.56
comp136023_c0	comp136023_c0_seq1	455.00	359.62	14.00	1.60	1.12
comp136043_c0	comp136043_c0_seq1	1019.00	923.56	20.00	0.89	0.62
comp136046_c0	comp136046_c0_seq1	687.00	591.57	19.00	1.32	0.92
comp136055_c0	comp136055_c0_seq1	860.00	764.56	28.00	1.51	1.05
comp136059_c0	comp136059_c0_seq1	462.00	366.62	14.00	1.57	1.10
comp13606_c0	comp13606_c0_seq1	911.00	815.56	29.00	1.46	1.02
comp13607_c0	comp13607_c0_seq1	367.00	271.65	7.00	1.06	0.74
comp13609_c0	comp13609_c0_seq1	426.00	330.63	4.00	0.50	0.35
comp136137_c0	comp136137_c0_seq1	317.00	221.68	5.00	0.93	0.65
comp136139_c0	comp136139_c0_seq1	402.00	306.64	12.00	1.61	1.13
comp136152_c0	comp136152_c0_seq1	507.00	411.60	13.00	1.30	0.91
comp136156_c0	comp136156_c0_seq1	1193.00	1097.56	35.00	1.31	0.92
comp136159_c0	comp136159_c0_seq1	410.00	314.63	13.00	1.70	1.19
comp136213_c0	comp136213_c0_seq1	1660.00	1564.56	50.00	1.32	0.92
comp13623_c0	comp13623_c0_seq1	1025.00	929.56	19.00	0.84	0.59
comp136256_c0	comp136256_c0_seq1	631.00	535.58	23.00	1.77	1.23
comp136257_c0	comp136257_c0_seq1	310.00	214.68	6.00	1.15	0.80
comp136267_c0	comp136267_c0_seq1	1714.00	1618.56	61.00	1.55	1.08
comp136269_c0	comp136269_c0_seq1	406.00	310.64	14.00	1.86	1.30
comp136281_c0	comp136281_c0_seq1	469.00	373.61	11.00	1.21	0.85
comp136287_c0	comp136287_c0_seq1	384.00	288.64	15.00	2.14	1.49
[truncated: 55,615 more rows]
