# Supplementary material for: De Novo Assembly and Characterization of Sophora japonica Transcriptome Using RNA-seq
Source: Biomed Res Int. 2014 Jan 2;2014:750961. doi: 10.1155/2014/750961 (PMC3910276; doi:10.1155/2014/750961)
Supplement: Supplementary file 1 — Additional file1: Information of unigenes expression in S. japonica. Additional file2: DNA sequences of all unigenes in S. japonica. Additional file3: Potential protein coding sequences of all unigenes in S. japonica. Additional file4: Quality score distribution across all bases. Additional file5: Quality score distribution over all sequences. Additional file6: Distribution of unigenes mapped to the speciesshown by pie graph. Additional file7: Detailed information for GO classification of unigenes in S. japonica. Additional file8: COG functional classification list of unigenes in S. japonica. Additional file9: Detailed information for unignenes mapping KEGG pathway in S. japonica. Additional file10: Illustration of the whole network of unigenes in S. japonica. Additional file11: Protein-protein interactions of unigenes in S. japonica. [file 750961.f1.zip › 750961.f1/Additional file/Additional file2 Sja.unigene.fasta]

>comp0_c0_seq1 len=1529 path=[2095:0-1528]
AAGATTTCTGTGGCGCAAGCGGGTCAGGATCTCAATTTCATTCACGAACTGTTTCACTCT
CCTGCAGTTGTGCTCATAGAGGCGCTTGACAGCAACTTCCCGCTCATCTTGGAGCTTTCC
TGGTTTTAAAGATCAAAGCATAAGTAGTTAACACCATGGTATACTATTTCGAATTGTTTA
TGTTTCAATAGGAAAGGTAGTGTGATTTGTTAAAATGCAGGGAAAGTTACATGGATATAG
ACACCGCATGGATACTGCAGCATAGCAAAAATTTTAAGTCGTTAGAATTTGAAGTATTGC
AGCGTGTTTGACATGAGTGTTTGATAAGTGTTCGTGCATCATAGTTGAGTCACTAACCAT
AGTAAACTCTCCCAAAGCCCCCATCTCCAAGTTCTCTACTATGATGGAAATTGTTCGTTG
CTTCTTCAAGCTCCTTATAGGAGAAGACAGGAACCCCAAAGAAGACACTGCCACTCTCTG
GGTCTGGATTTGAGTAGGGATCGGCATGACATCTTCTTGATTGGTCTTGGAATTCTGAAG
TGCATCTTCGTTTGAAGAGGAAAAGGATAATAAGCAAGCCAAATGCGCATCCAATAGTTG
AACCTAGTATCACCTTCCAAACTCGTTTCTTATCTTTGGCTACGGCACAATGAGATTTTC
CTTTGTCATTAACTCGACATAGGCCTCCTCTTCGATAATAACACCTACGACAATCCTCAT
TTAACACTACTTTTATGGTAAGTATAGCAGCAAAGGAGGGACTGCGCATGGAAGTGGAAG
GAAACGGTAGTAGTCCCATTGGAAGATGGAAAACTGAACATGGACATGCAGCAGGTAAAG
AGCATGTGGACTCGTCATGTTTTCCAGGAGTAGGAGGAAAATAGTAGACACCGTAGTCAT
CACAGTCTGCTAATTTCACCAAGTGTTTAGCCTTAGGGTCGTGCTTGCATCTGAACAGGG
TTGTATTGAGTACCATGTTGATCTGAAAAGACATTATAGGAGAGGCCAGGGGAAGGATAT
CGTTAAAGTTGAAGACACTGCGACTTTCAGAGCACAAGAGCTCTTGAAGCTCATGGTCTA
TAACTTTTATGGAAAATGCATTGTCCTGTGCTATGCTTATAATTTTGTACAATTTCTTGT
TTCCCAGTTGGACTTGCTGATCTCCATGTTCATCATCACAACCCTTTATGGGTAAACCAC
AATCTGAGCTCGTTGTGTTGGTGAAAGGAAAGTGAATGGCGTCCCCAAGGATTGCACAAT
GAAAAAACTGTGGGCAGTGTTCATGGTATCCCATTTCATCAGCAGACGATAGAAGAAGCA
GAAAACAACAGAGTACGAGGAAACAAAGCAGACGGCACAAAGCCATCCTAGATGTCATAA
CCTCACAATTTGCTTAGGCTAACATAAACTCTGTTATCTCCTGTGTTTTATCCACAACAT
ATTAATTCTAATTGTAACCATTGTTATCTATTGTATCTATGTTTACCAAGTCTGGTTGAC
TTTGCAAGACAAACGACTAGGAAAAAAAG
>comp2_c0_seq1 len=764 path=[1:0-763]
TTGGCCTTCCCACCTCTCATCAATGATATTCCGTATAGGCTCTTAACTACAAATTACAAA
ACACAGACAAGAAATCAATTTCAAATTCAAATTATCAAGAAGCCAAGAACAAGTGAAGTG
CTATAACAATTAAAAGTTTCTTATCATTGTCATTGTCAAAGTTGAGTTTCATCTTTTCCT
TTGCACAATTCATCCCTTCATATATGAAACCCATAGCAGGTTTTTCATTGGAATCCACTA
ATCAAAGAACTTTGATTAGAGGAGAGCAGCCTTGAGACATATCACATTGTTCTTCCAAAA
TCTGTTATCCAAATCCGTGTTTGCCTCTCGTTTTCCATCAGTAGTGGATGCAAACTTACT
AGACTTCTAATTTTTTGAACTGAAAATATTCATTAATGCTCCTTTATTATCATTAAGGCA
TGCTAAAGTCAAATATGCAATGACAAATTGAATCATGGATGGCCTAATCAAGTCTTTACC
TTTTGGGAAGTTCTTCAATATGCTAATGAGCATTGTTTTCATGAACTCGCACTATAAACT
CGAGATTTAGACAATTCCACAAGTTTGTGCCAAGTTTGCTCCAAGTTTGACAGGTTGAGT
TAACAAGTTTTAGCTAATTCCAAACATAAACTCATGATTTTATGAGTTAAAACACGAGTT
TAACTACCATGCTCCTGTCCATCTTTTACATAATATGCATGAATTCATATAAATTAGTAA
ATGATGAGTTGAAAGCAGTCATCAGGAATAGAAATTGTGGTTGG
>comp2_c1_seq1 len=357 path=[1817:0-356]
TGATGAGAGGTGGGAAGGCCAACTACATAAGCCTTTACATGTGGCTTCTTGTTATCTCAA
TGCTCATTACCACTATGGTCCTAAGTTTAATGCTGATATGCAGCTTAAGAAAGACTTACA
TAGTTGCATGACAAGATTGGTGGCAGATCTGGTAAAAAGAAGCAAGTTGGATTTGCAGCT
TGCTTAATTTCACTATGCCTGAGGGCATTCTGTCTTCCAGCTGCTAAGGATAACAAGGAC
AGAATGTCTCATACTGAATATGGAACTTCTATAGATATGGATGGCTAGAATTGAAGATAC
TTACAATTATAATATTTAGGTTAACTTGTAGTTCTTCTAGATGTGAGCGTAACTAGA
>comp3_c0_seq1 len=1818 path=[1:0-982 984:983-1817]
AAAACTTTTGAATTAGCTCTAGCTTCTTCATGAATTTGGAATCAATAAATCTAGATTAAA
TTTAGTTTTAGTTTTAAGTTTGGCTAGAACTTGATGAGCATGTTAGTGAACAAACTCCAA
CTACCAAACTGTCATGGATCTGCCTTGCAGGATGAAGTTAAGAGACTTTCTAAAAGACTA
GATCTAGAAAATGATATATGACATTATCTAACAGCATTAAAGCAAGTATTTTGAGTCTCC
ATTATGCTTTCTCAAAGATGCCATGTGGCTATTTAAAATAGTAACTGAATGACAATAACT
TTGTGCCTTTGGAAGCTGGGGCAAAGTACTTCAATATTAGCATACCCCTGGTATGTAGTC
AATCCCTAGCCTGTCTTTTTTCTTCCCTATTTTATAAAAGTGTTGTGTAAGTTGGTATTG
AAGTGATAACCTAAATCATCATTAAGATAAATGGAAAGTTCATGAACTTAAAGATGAACT
AGTATTGCTCTGCAAGTGCATTGAGAATATTGACTTTTATATAATAGAGCAAGAGACTTG
ATAAATGAAGTCTTTTATACGTTTAAGCATATTAAGGCGGTTTCAACATGCAATCTATTC
TTATTCCCAAGGAGTGATGGAGGACACCATGGAAGTTGTTGATGAACTGAATATAATGAA
GTGATAGATGAACTTAGAACTTTGTTGTAAAGTATGAAGAACCAAGCATGGTTCCATTAA
ATTGAACTATGAGACATCGTAAAATACCATTTTGATTTAATAATTGATAATGAAGCTAAG
TAAAGTTCAAATCATATCAATCTTTTAACCATATTGTCTAGCTTTTGATCAGTATGGCTG
CAAGGGCTTAATTTTTCTTTGGCAAAACGCGGACTATTTTTGGTGATGAATATAAGATAC
TTAAAAATGGGTGAATGGAAACACAATTCATAAAGGGGTGAATGGATGAAAAACAATTTC
TAAATGCAATCTTCATCTTTTGTGAGTTCTAGAGGGAGTGGATATTAAGAATTGGATATT
GTATTTTGATCAGTATGGCTGGAAGGGTGTCATTTTGCTTTGGAAAAAAGCACAATGTTT
TTGGAGATTATATGAGAATGATTACAAATGGGTAAGTGGATGAAAAAAAATCCTAAATGG
AATATAATAAGTATTGAGAGATACCAGAGAGAGTATGGAGAGAGAAGATTAGAAAAGGAG
AGATGCAGGTAAGAATAGCAAATAGCCAATTTATCCAATCTTATCTCATATGAAGGACTA
TATGGAAAATAGCCACATAATTTGGCTTATAAGCTCTTGAAACTTATGAGGACATATTTA
TTTTGTTAAATACATTAGTACTATAGTAGCTATTTTACGGAGTCATAAGAACAGCATAGG
GAAAAGAGTATATATGTGGAATTTTGGAGAGGCTAAGGACAATTTTTGGGGGCTAAGGAT
AACACTGTATAAAGGTAATCAACCCAAAAGGGCTAGGTATCCTACTCATAATTTACCCTA
TTAATAGATTCGTTATAAAATTATTGCAAGTTTTAGTTGAATTACAAATCATTCCTACTA
TCCTTTGATCTCATTAAGTAGCTTCCAAGGGAACTTCAAGCATGTCTGTTGGCATTCCAT
GAATATCATATTGGACTTAAAAATGCAGGTATTAATCGTGAATGAGGAATTGAATTAGTT
GTGGAGATCTATAAATATCTAGAATTGGCTCCCTAGGCAAGATTGATGACCTTTCTCTGG
GTTCTGTCTAAGTTGTTGATCTAGTTTATTGTATTTATATAGGTTATTAATAATCTTTTG
CAAATAACAAGAGTAGGG
>comp4_c0_seq1 len=452 path=[687:0-451]
GAAGGACACGTCATATTCATTTAGAATTAAATCAAACAACTTATAACATATATTCTACAT
GTAAGCACCGCAGCTACAGAAGCAGGTATATCATAATGGATTACTACCAGGTAATCATCA
GCATATAATAAGCATCATAAATGACAGTTATTAATTTCCTTTCTTTTCTACATCAGATGA
AAACGATAACTAGCCACACAGAGGGTAGGATAAATCCCAAGAACACCCAGAAAAGCTTTT
GGACCATGAAAGGCACGAGAAAGAAAAAATCAAAAAGAAAATAAGAAAATCATAACTACA
TAAATAAACCCAATTTCAGAATACATAAACATATAGATAAAAGGCCCACCTATTGTAAGG
ATAATGGTATGGGTCTCGTTCTAATTGCCTCGCATGACAGAGACAATAGAACAATGTCAA
CATTTGATTTGTTTTACTGTTCTATCCTTTTT
>comp4_c1_seq1 len=366 path=[344:0-365]
ATAAAATCCAAAATCAGATGAACAAAAATAGAAAAATAAATGTTCCAATAAAAAAAATGA
AAAATAGATCTAAATTGCAATTGTTAGAAATTCTGTTTCTTTGAACTCACTAAACTTAAC
TGCATCCCCATTTGCTAATACCCAAACATTAAATATGCATTCCTACTGCATGATTTACTT
ACGCATATCAACATCTAGTACAGGGTGAACAACCATGCATCATTAACTAATGACAAATTT
AAGCCGCACCTAGCCACCGTAGGGCCATATCCAGGATATTCTGTGTAACAAAGGAAATTA
GATTTTGGCACCGAAGGAGGAGGTCTTGGCATCTGTAAAATTGTGAGATATATATATATA
TATATA
>comp5_c0_seq1 len=716 path=[1:0-715]
GGAACCTTTGCATGTGAGGTCCGAGGGCCGATAGGAGGTAGTAGCTGTACATGACGATGT
GAACGAAAGTGTTCAACAATCCGAAGAAAGTGCTGTGGCCACCTGGAGTGAATTTGACGC
CGAACCAGACGCTCATTGGCATGCATCCGTGGTGAATGACGTGGAGCGTGGAAATATGCT
CGTTTTTCTTGCGCAAAACGAAGAATATCGTGTCCATGAACTCCGTGAATTTCGAGAAAT
AGTACCACCAACAGACGTGTACCATCCTTATCGTATACCTGTCTTGTCCGTAGTCGACAG
GCTGACACTTCAGTGAGTAGCGCCCGGTCAGCCATCCGCTTGCACAAAGCTCGTAGAAGA
GCCAAGTCGAGAATATGACTTGGAAAAGGTTGTAAGCTATAAGAACGTTTTTGAGTTGAA
AGGGCTTTCGGTTCTCCATGAACCGAGGGCCGGCGACTTTGACGAAATAGACGTACGAGA
GGCAGATGACGAGGGTGGGGAACGGCGAGCTCATCATAGGCCAGTTTCTCGTTCTGGGAT
CTCCATTTTTGTCGAAAAGTTCCTGTATATCATCTATGTACTTTAGTAAGAGCGCCATCT
TGGTTGAGATGCGTGGTTTCCGATGTGAAGAATTTCAATCCTCGATCAGCTTCTTGGAGG
CCTGAGAGGGATGCTGCAGAGATGAGGATGGACCGCCGTGGGTTCGAACGGATTCG
>comp5_c1_seq1 len=1730 path=[3094:0-1729]
GGAAGTTGAAGAAACGACCCTTTATTGGCGCAGAAACTCTTTAGAAATCCCATGATGGAC
AAACTTCAGCACGTGACATTACTCAAAATCCAACACAATTGAATCCTTCAAGACAATGCA
TGCTGGTTTACATCTCAGTTTTAAAAGAGAATCGAAAACGCAGGAACGTAGGAGTGAATC
CAGTACGAAAAGCTCGAGCAGAACTTGGAAGTGCAGATTCTGGATACTGCCAAATTTGTT
CAGAAACTGGAATTGCGTTGAATCCAGCTACATCAATAATGGGCATCGATAACAAGGTGT
TTCTGCAGGCAGTAATTGAGAAAAATAGCGCAGGAGCGTTCAAGCAGCTCCTGGCTATGA
GTGGATTTGAGTATAAGGAGTCTGCAGGAACGAATCTTGATTGGAGCAGAAACTAAACAG
TGAAACGAGACTGAGAAATAGCAGCAGTAAGATGTACAAACTTCAACAGGTGACTTCACT
CTAACAATCCAAGCTAAAGGAAGGCATACATCTAAATTTTCAAAGAGGAATTTATGACAG
TTACATTACAGTGAAATCCATTAGCTCCCAATAAGTAGACATCGAGCAGAACACTATGGA
GTAACCATGGATATTACAAATTTTTGTCGGATGACCAACTGTGCTACTACCTTACTTTCC
CAGTTCTGACGGTGATGAAACTGCTCTTCCAGAAATAACAATATTTCCTGCTAATCTTAC
AAGTCTCCTTTCAAATCACTCCCCAGCATGCTGAATACACAACGAGAACTCCAACTTTTA
TTAAGCTCAATACATAATTATTACAAAACTAATAAAACAATCATACATCAGTATCAGTCG
CATGATGTTTCTGGTAATGAACTTTTTTTTTGTATCTAAAGGCCGTGCTTTCTGTACAAG
GTAAAATTTTCAAGTGAATAAATTAAACATTGGCCTCAATACAAGAAACATTTCTCGAAA
CTCAAATTCGGCAAGATTAATACAGGATGATTTCCATCATCAAATGCAAGGCTGCAATGT
TTTGGGTGTTTTTTTCAATTTTTTCACGACCCCGTTTTAGGAATCCGTGACGGTTCACGG
ACGATGTTTTCAAAGCTACTTTCTTTGTATTGTACTCGTACTTGATAGATAACGATTTAA
CGACTTACAAAGTTGTCTTTCGTGGGTTTTTTTCATGTTTTCACATTGCACATTATAAGT
TTTTTTTTCGTACGACAGACGTATTGCTTAGGTGTTGGAGGGGCGGTGAGTTCTGGCTGT
GTCGCCATGGTAACACTTTCGAGTTCCGCCGCGCTTACGTCGCTAGGCGTTCACGTTCCC
ATTGGCCGGCCGCCTTTGCACGGCTCCGTTCACGTCAGTTTGTGTGGCGTTGACGTAGTA
ATCACTCTGTCTGCTGAAGCCATTCGACTTCCCATTGAGATGCGACGTCCCATTGGTGTG
CACTTTGCCGTTTGTATGCGCAGTTCCATTGGAAGCATTTCCATTGGCCGCCAGCTTAGC
CGCTGCTCTTCTCTTGGCGCCGTTGTAGGACTGGTTGTAGAACTCTTTGAAGAGGAAGAA
GAACATGACGGCGTGCATTCCTATCCACCAGACGAAGGCTTTGGGGTAGTTGCAGTCGAT
GAACAGAAGCTGGAAGGCGTGAACCATAATCGCGACAAATTGAGCCATTTGGAGGGAGGT
GAGGTACTTCTTCCACCAGAGGAACCTCTGCATATGAGGTCCGAGGGCCG
>comp6_c0_seq2 len=431 path=[754:0-108 346:109-430]
GAATTGGTACACGGGAATTGGTACGCGACAATTGGTATGCAATTTGCATGGTTAGGGAGA
GAACCCAGTAACTATGCCCGTAACCACCGGTCACAAGGCAACAACCTTACCTTTGCACCA
AGATTCACCCTCTTTTTTCACCATTGGATTGAGGGAAAAGAAATATTGCATTATATGCTT
TTCACGCCACACCACAATGGATACACGGGAGAAACATTCATCCTTCCCACCAAGACAAAG
GACAATGACAAACCAAATATATTATGGTAGAACACCAGGACACTAGCAGCATGTTAGCCA
ACAATGTTGAATAAATGAGGCAAATATGAAAAAGGATAAGTGGAGAAAAACCACTTCATA
AATAGAAAGAAAAGGAGCATATAACAAATCTAGGAGCAGATAGCTTACAAAAGGATATAT
TCCAGGGTTGT
>comp8_c0_seq1 len=431 path=[1:0-430]
GAAATTTTCTGCTTCTTCTGCTCTGCAGCACAAAATGGTAACTGGCAAGTCATTAAAAGG
AAAATAAAAAATTGCATCCTTAACAAATTAGTTTAAGCCTCTTCAACAAAAAATAAATCA
ATAATAAATAAATTATCCTTAGAAAATTCTCTTCAACAAGCATTCACCCATAGCTAGCCT
TTGATATACGTTCATGTTTCCTATAACATCCTTAAATAGCACCTGCTCAAACTAGCAAAA
TGGATATTTTAAGATCACATGATATCACATCCATCAGTTCCAATATGCGCGACATAACTT
CAAAAGAGAAGCAATTAATATCTTAGGGTGAAATTAGTGATTATAGAAGGTACAGATTGC
ACTATGCCCTGCACTTCAAAGGCTGAGATCTAAATCAAGCAAGTGCATGCACATGATTAA
AGCAAATAACA
>comp10_c0_seq1 len=574 path=[552:0-573]
AGGAGGGGTTGATGCTGGTGGTGGAGAAGACCTCTTAGGCGGCACAGCTGCCGGCGGTGG
ATTAGAATTCTCAGGTGGTAGCGCCGCCGATGCTGGCGGAGGAGTAGGCGGAGGAGAACT
TTCTTGCAACGGGGACTGTGGTGGCTGTGATGGACGTGTAGGAGAAGATGACGGTGGTGG
TGTTGAAGGTGACAATGAGGGTGGTGTTATAGATGATGAAGGAGGAGGTGACATCCGAGG
CGGTTGTGACGGCAGAGGAGGCGACGGCAGGGAAGGAGGAGGAGATGTTGGGGTGGCCGG
AGGTGATGACTGAGGTGGTGGGCTTGAAGTTGCTGAAGGCGGTGGCGAAGTTGAACTGTC
AGGTGAAGGGGAAGTGGTCTGCGGTGGTGGAGTGGTAGTGGTGGACGGCGGTGGCTGTGG
TGGTGGTGCGGCTGTGGAAGACCCCGGAGACGGCGAAGGTGCTGACATGTTGTGAGCAAT
AACGGCGTTCTCTGCTTCAACTTGAAGCTCACGTCACATGTCACGTTTGCATGTTGCACA
GACCAAAGTTGGAAATTTTAGACACTATATTCTG
>comp11_c0_seq1 len=363 path=[341:0-362]
GGCGGGTCGGGTAAGTTCCGCAGCAATCGGGAAAAGATGGAACTGAAATCGCCAAAGTCA
GTGACGCCATTGCGGTATTCAGCTAAGAAATGGTTAATCGATTCTTTGAGCATGGGCTGG
TAAGGTGGAACGTGATCGATGTTCGGATTTTGGTTCATTTTTTGGGAACCGCGAGACGCA
GGAGTTGAAGCCGTGAACTTCAGAGATACCTTTCGGAAATGGCAATTGATCGAGAAACTC
GTGGCTAGTTCGGTGCCTTTGAGTTCAGAAGCGTGGAGTTAAAGGGTAACAGCAGGCACC
AGAATTTGAATTCAGGGACAGAGAAACCCTAGGTTTGCGGGTGATGTATAAACTATGAAG
CAG
>comp11_c1_seq1 len=463 path=[1121:0-462]
CAAGAAACCAATCTCGCAACCCATCTTGATTCCCTTCCTAAATTGGTCACTCACAACGGG
GAAAAACCCTTTCAGGTAATCCCCAACCCCATATTGATCAACCATCCAAACGGGTACCAC
ATCCAGAAAATCTGGCTCCAAACTCGTGGTCTCATAACTGCCACCATGAACCTCCTTACC
ACAAAAAATGCTGCAATAACTAATGAGTCCTTCTAACAAGCTTTCGACCTCACTCTTCAA
ATCTTTCTCATGAAGCGCCAAACGGTACAACTCGTAGACTACAGGAGCGAGAATACCAAT
TCTCTTCATCGAACCGCAATAATCTGAACAAGAAAGTAGCAATTGAAACAAATCTTTAGC
TACTGTAGCTCTTCTAGAAGGTTCTCCACCAGCTCTTAACTTGTTCGTGTGAAATTCCAG
GGCTGAATAAAACCACACGATTTGTAGTGGCGGGTCGGGTAAG
>comp13_c0_seq1 len=466 path=[1:0-465]
GGTGCCTGTATTCATGCAGGTATTACTAACTCATTACCCCTTAATTACATTTATACTACA
AACAATAAGGCGGTTAACCTTGAATTCTGTGTTCTTTTTTGTGCTATTATGGATACGCTG
TAAATCATAACTAAAATCTAAATACTGCAATTCGAAATTACTGATGATTACATAATTTGT
CACCAGGACTATCTTGATATCTGTCATAAGGCCAGGACTAAATACTTCTCATTCAATTCA
CTTTGTTTCCTCGTGTTTTTGGACTAAATGATAAGCCTCAATGTTATCTGGTATACACAA
TTGCACAGGACCCGTGCATTGGATTCTAGTCCTTGAGCAAGAATCCTTTTTCTTCCATGA
CATGAATTGTTAAGAAGTTGCTGCTAACTAGACAATAAAGTTCAACTGGAAGTTGAAACA
TTGTCGTTCTTCACTAATGCAGAAAGTTTATTTTCTTAGAAGCTTG
>comp14_c0_seq1 len=346 path=[377:0-345]
CTTCAAATCAAGGGGACATTCCCTGAAAAACATTGAGAATTTGGATACATAATTGGAGAA
CAATGGCTGTGTTTTAATAATACAAGTAGACAACTTTAATAAGCATTATAATTTGACACA
CAGGTTTCCTAAACCAATCAAATAGTAAATTAGTCAAAGCATGTTGAGTTAATGAGTTGC
TGCAGCAGCACGTCTTCAGCCAGAAGTGTTAGCCAATGATTTTCTTTTTATTTTTTCAAC
CTTTTATTCATTATACTGATACTCCAAGTGCAAGATTGTTGTGACAGTTGCAACATGGAA
GGTGTCAATGACCAACTCTTCCAATAGCTTAAATTGTTAGGTGAAG
>comp17_c0_seq1 len=846 path=[2236:0-845]
ATACTTGTCGATAGAGGCCTTAATGGATCCAACCGCTTAATTATAAATCAAGCATCTCAT
CAGGTGGCTGTGTTATTTTTTGGAGGACCAGATGATAGGGAGGCATTAACCTATGGATGG
AGAATGTCACAGCATCCAAGGGTTCGTCTCACTGTCATGCATTTTGTTCCAGGCAAGGAT
GCAACTCAGCCTCAGACTACAGACCAGTTTAAGACTGAGCTAGATGATCAAAGAACGATG
AGTATAAATACTGGAAGACAGAACAAGCTAGATGAGGAGTATATAAATGAGTTCAAGATG
ATGTCTGCAAATAATGAGTCAATTGTTTACATAGAGAAGGTTGTAAGCAATGGGGAGGAA
ACAGTAGCAGCAATAAGATCAATGAACAGTGTCCATGATCTCTTCATAGTTGGGAGAGGT
CAAGGGGAAACATCACCACTAACAGATGGCCTAACAGATTGGAGTGAATGCCCAGAGTTG
GGTGCCATTGGGGATTTGCTAGCTTCGTCAGACTTTGAGACATCAGCTTCAGTGCTGGTG
ATGCATCAATATGTTGGGCTAGGGCCAGAAGGGGAGGAGATTATAGCATCTGAAAGACCA
TGGCAAACAAGTGAACACTATAATAGCATGAAACATATGGGAAGATATGCATCAACATCA
AAGGGGCGAGCTATATTTAATTAGGCCTTTAATGTTCCTTATTTGCGGTTTTGTTGTCAC
GCGTAACCATGCAAAAAATGATTATCAAACAGAAAGGTGGATGTAAATCTTTCCAAGTGA
GCAAAACACTTGTTTTCTAGTATTTTAACTGTTATTTCTTGTTAAGGAAAAATAACTAAA
ACTGCA
>comp17_c1_seq1 len=729 path=[707:0-728]
TCCCTAATAAATTGTGGTTCACCATTCTGAATGCTGGATTTGTGTCTTGCATTTCTCCAT
CAACTGTTTGTTGCTTATGGAAAGGAATGATTATGACAGACACTCTTTTCTCCTCAGCTA
AATTGCATATGTCTTCATGCATGGTAGAGTAAGGGGAAATAACTGTCAAGGGTTGGACTG
ACACACAACCAACATGTTCCTCAAAATTCTCAAATGCACTTATAATGTGGTCAGTTTGTG
CTTGTGTTTTATTGAGGGCTGGGCGACCTGATTTTCGACTAGCACGGACAATGAGCATGG
CAGAAGCTCTACCAGTGAGTTCAACTAAGTGGAGCACATAAGCACATATGGGAGACTTTT
TGGTGGGGTGGGTTGCTTCAAGGAGATTAATTATTGTAGGGACATTTCTAGGGACGTGAA
CACACACCAGCACTCGTAACTCTGCATCAAGTCTTGAATTTTGCATTGTTCTCTTTTTGT
AAGGTACGAGCCTTCTTCTTGGCTTATAAATTGCTGTTACAATTGGTGAAATGATTCCTG
TCATTACAACCGTTACAAGCACCATAACTGAAAATGTTTCATCACCCAAGACCTTTTGGT
CCCTCCCAACATTGAGCACAATCATTTCAATAAGGCCTTTAGTGTTCATAAGTAAACCAA
GAATAACACCTTCACGGGCTGGTATCTGGAAAAGGAGTGATATAAGAAGAGTTCCGATCA
TCTTGCCAG
>comp18_c0_seq1 len=818 path=[796:0-817]
GTAAATAAGAATGAATCAACAAAATAATATGCTTGAACACAGTTAAATACGCACTATCAA
AGAGTCAGCGATGTGTGCATTAGAGGGAGAGGCCAAGAACATGCTAATTCAGTCTTCTCA
GGAATATTGAGCATTATCTTATCTCAAACATCCTCTGCAGAAAAACTGGATGTGCCTTGC
CATTGTATTTTTCGTATTTAGTATCAAGTAAACTCGGTGCCACAAAGAAGTGAAACAACG
AAAGCCAAACAACTTAGTCATAGGGGTTAAAAGAAACAATATGACAGTACAACTAAACTA
TATACATGACAGGATGGTCAACTGGAGCTGATCATACAAACCCAAACCAAAAGGGGATTC
AAGAACATTCAGCCAGACAATACAACAGATACCGATGGATGCACCCATCCCGCCTATTAC
TCAAGAAAAGTAGGCAAATTTAACATAACTAAATTGCATTAAGAGGATGGTTTAGGTGAT
TGAAGGTACAATGTGCTGATCTATTACATGAACTTAGTTACCTCTATGGCCATGATGTTA
TACATAGGAACATGACTTTTGACTTTAGATTCAGGTTACCCATGATGTTACAGATAAAGG
GAGCAACAATTCTTCCCTTACTATTTTTATTAAAGAAAAATTCAATTATGTGAGAAGAAG
GGAATTTAGATATCCTTTCACAATTAATAAAGCAGCAATGAGCTTTGCTCTTTAATATCT
CTATCTATTCCAGGTAAAATTCATTTGTGTGAGAAGGAATGTAGGTGTAGATATCCCAAA
GATAGAAGAGATGATATTTGACGTCCCAAAGAGGAAGC
>comp19_c0_seq1 len=340 path=[1:0-339]
GGGGGGGGGGTACTCTCTTTCTTCCTTTATCTTAATATATAACAAGCAAAATTATCACTT
GTAGTAATGTGCTGGTTTGATCATGTTCAAAGAAACTTAAATCAGAGTTGATGTCTCGAA
TATGTTAAGTCTATGTGAAAATTGTAATTTTTTTCATATGTAGGCAGCCTTCAGAAGTAG
TTATGTACAGGTTAACATAATATAATGCAATGATGAATGAACATATTCTAGTGTGCGTTT
TTCTTATCAAATTTATACACATATTTTCCCCATTTTTTGTCTGTTAATAGTTTCTTTTCT
ATTGGCTTTGTTTCTAGTTGGACCAAGTAGCATGCCATGC
>comp19_c1_seq1 len=375 path=[635:0-374]
TGGTAAGACCACGAGGTGTCCCCATACCCTTTGATGTGAAACTAATCTCCGCCCGGGCTT
GTAACTCTATGCTTTTATAAATTTATTATTTCTCCATTGCTTGCATGTGATAAACATGTG
GTTCTGGGTTTATATCCATCTGACATAAAATCTTATAGGCACTATTTGAAGATGATTTAG
ACTATTCAGAGCATGTCTTTATTGATGACTTAATGTTTTTACTTGTATAGTCTTAACTGC
AGAATTTGATTCCATCAATCTTTTCTTGTCCTTGCTTTATTTGCTCAATCACATGTCGCT
AATGGAGGATAGGAATAAATTCTTTTCTCCAAAATTTCATGTTACTTCAGGTTCTGTTAT
TTTGGGGGGGGGGGG
>comp21_c0_seq1 len=346 path=[247:0-292 217:293-345]
GAGTATCCATGCATCATAGCTTCTAGGAGAAGCATCACGTGTTTGTCAACGTTTGCGCCT
AAATTCTTCAAGTTGATGGGTTATGTGTTTTTTTTATCCTGTTTTCTATTTGTAACAAGC
TCAGCTTGAGGGGGAGTATTAAGGAATATAATGTAGTATTAAGAGATGAGGAAAGTCTTA
TGAATTAAGTAAGTCGTTTATTGTAGTGTAAAAGTAAAGGGTGTATTATAACCAACACGC
AGCGGAGAATAAGGAGAAGATAAATCAACACTGATTTAATGTGGTTCAACCTCCAGTGAA
CCATAGGCCTAAGTCCATGGGGCAAAACAGAGAGAAAATTCACTAT
>comp23_c0_seq1 len=1193 path=[1:0-1192]
ATCCAAGGGAAAAAATATTTGTAACATATAGATATAGGTAATGAAAAAGAAAAACAAATT
AAAAAATTGCATAGTTGTAGGATGTGCTAAGATATAGAAAATGTTCTTATTAACCCTTAT
GATGTAGTTGCAATTACATAAATATATGATTGACACAATCAACTCTAAAGTGCTCGCAGA
ACAATACAAACACTTTCTTTTGCTCATCATCAATTGGAATATTGATAGACAGTTGATTCA
GATTTCGTTCAGTTCAAGAAAGGCATGATATTTGAAGCCAAACAAGCAATAACAGTATAT
TGTAAATCATAAAATACATCTCTGAGCATGTACCAACCTATAGCAATTGATGAGCAAGCC
AATGGAATTAAAAATCAACAAGGGTAAGGTCACATCAACTGAAAAAATATAACATATGTA
TAACCATGCATTGATGCAGTTAGATCTTTTTATTCACCAAGAGTTATTGTTCTATGTATT
TAATAAGTTAATTAAAATTAGAGAAGTAATTAAAAGTAGTCTAAAAGCCAGTCAAAAGTC
ATTAATTACGCCACTTAAGGGTCCAGTCAGCTCTAGAACATTACAGGGGAGTTTTCAGTA
CTTTTCATCAAATTAATGAAGTATTACGAGTTAAACTTATCTAATTCATGTTGAAGAGCA
TTTCCGTCATTTCTAGGATTAGATTAGATATCTGAAGCCTTTTCAGATTTCTATACAAGG
AGGTGAACTCCTCCCATTTCCAACCCCATCCTACCCATTGTCTTTCTCCATTAAATTAAA
ACATTTCAGTTTAAACCCCTGGTCCACATCAGGCATGCTTTGCTGTAATCAGTCACAAGC
ATGTAGAATTTCAACCAGAGGTAACTCCAACTTTCAAGGAAATAGTTTTTTTAGAAATAA
AACATTAGAGAGATAGATTACTCACTCTCACAGGGTACAGAATAACGAGTCATCTACATT
CTCTCGTAGAATATCTAAAATACTACCTAGAATAAAGAAGACAAGACCAACTAAACAGAA
GAAAACTCAATTGCACAGGAGAGGAAGAAACAGCATCACTTAAGTAACTAATACTAACCA
TTGTTGTGGTAACTAAGTTAAAAATCATCAACAAATAGTTTCAATACTTTCAATGACTTG
TAAGCGTACAAAAGCAGGGAAGCTCAATTTTATAAGATTCAGCAAATGCAATA
>comp23_c1_seq1 len=384 path=[2702:0-383]
CGCCCTAAGCTACCTGTGCTTAATCACACAAAAAAGCACCCAACAAAATATTAACCAATG
TAAAGTGCAATCTGAATACAGATTAGCACTATGTCCCTGCATATCACTCTGACCATTGAA
AATACATGGAAACATAATAGCTCAACAGGAGAATGTTTATCATCCAATCATGAGTCATAA
TTGCAACATCACAAGGTATAAGGAGACATGATTGGATCATAAACATCATCCAATCTGTAG
ACATGCATATAATCATTAAAGAATATATAAACCCTTTCGGCTGCTTAAACCACAAATATA
GTTAAGCAAGCATAGGTCAACCCAAGATTGCTAAACTTCACAGAAAAAAGTCGAAAGTTG
CAGCTCCAACTTATAGAAACAAAG
>comp26_c0_seq1 len=389 path=[1109:0-388]
TCACCCATTAAGAATTTTTATTTAATTCAAGGTCCAAATCTCACTTGAAACTTTCACCCA
TTGAGAAGAATTTGGACTTTGGATTCTTCTAGTGTATTTACTCACAAGTCCTTTTCTTCA
GTTTCTAACTCATCCTCCTAATCATCAGTGGTTACTCCTTGACAAACACATTTGAAAGTC
CAAAACTCCTTCTAAGGTCAATTCTTTTGTTTGGACAACACTGATTAATAGGATTAATAC
AAATGAAACAGAAAAAATTATCATGTTATCATATAATTGCCAGTTGAAGAAGTTACAAGG
TGAATATGAATGTTTAACAAGTATAAGATATCAATCCTGATTCTAGAAAAATTAAAAGGA
TTTCCTAACAGAAGACTATCACTTCAAAG
>comp26_c1_seq1 len=577 path=[555:0-576]
ATCACTTCAAAGGTTGAAAGTCACATCATGTACTGTTTCATAAACTATTCAGACAGACAA
CTTGCAAAAATGAAGCCTATGAAGGCACTGATCACATGAAAGACAAATAAGTATCACTAA
TATAAGGAAATTTTCAATTGTTGTAAGATTTATATGCATAAGGCATATCATATGATTTAT
GATTTACACATACAAGTTAAGGTAGGGTACAAGAAAAAGGTTCAGGACAATGATAGGTTA
GCAGCTGCAAGGTCAGAACCAAAAGAAATAATTTATGGCAATAATCAAGAATAAGCTCCA
TAGTGACTCTCTGCTTCATCTACATGTTAAGGAAAGATTCCATAGAACATAGTATTGACT
ATCTAGATTTCTGAAACCTCTAACAAAGAAAATGCAGACAATTTATCCATCCAAACACGG
AAACGCAATCTAAGTGATTCAATAAATGGAGATCATTTATGACTGAGACATCCCACTCCA
ATCGATAATAAATTACAATTAGCATGCCCTTCTGCAAGTATCATTCATACATACATACAT
ACAGAAGCAATAGAAGAACAAACACAAGTGAATAAAG
>comp27_c0_seq1 len=374 path=[1:0-373]
GTGAAACCATTGTTCTTCAAGATTTTCATAAGATGAGAAGTAAATTTAACATGTAATTTC
ATTCAATAAAGAAATTGCGGCTCTGAAGTTAATGATATAGGTTAGATAAGTTGCATACAC
ACAGTTAGCGAAATTTCCTCTTTCCTGATAGTCAGCTCCTGTCCTCCCATGGTCCCTCCC
CTACTTATTTGCATATTAGGAAAAAAATCTTTCTAGCACAGCTGCTGAGTTCTGTAAATA
GATGTATGGCACCAAGTTATATTGTAATTTTGTAGTTCTATCTGGTTGACAGTCATGCAA
ATCCCTGATCCAATCTTTTAAATCCTTGTATCATTATTTCTATTTTGTTATCAGATACTT
TGACAAAGATTAAT
>comp28_c0_seq1 len=308 path=[286:0-307]
AGCGAAGGCGAGGTGGCGCTTCAGCGGCGGCCGGTTCGGGGCCTCCTGCGGCGGCGATGC
GCGGCGGTTTGAAGCTCCAGCGCCGCCGGACATGGAGCGGGAAAGCGATCGCTCTCCCGG
CAATGAATCCCAATTCGGAGAAAGTTGCAGGGTAGAAGGCAGAGGGTTCGGAAAATGGGC
GCGGAGGGAGGTGGGAGAGGAGTAGGGTTTTAGAGAGAGAAAGGAGAGTTTAGAGAGAGA
AAAGGGTTTGGAGGAAATAGAGGGAGTTAGGGGAAGTAGGAGGCGAGAGCAGAAAACGAG
GGAAGGAG
>comp30_c0_seq1 len=516 path=[20:0-515]
TTTTCCTGAATTTTTTTTTTTTTTTGTCTTGATGCCATGAGAAAGGGGATCATTGCTGGA
TGTAGGCCTTTCATTGGTTTGGACGGATGTCATCTGAAGGTTAGTTATTTGTTTGCAAAG
TAGTGATATTTCTTTACATACTCAATTATATTGGCTACTTAATTCACTCTCCATATGTGA
ATATGTTAATCTCTATTCAATATCTTAAACACGAATTATGTTCTTATGCATTGGTTGCTG
TTTTTGGACTCTTTATACTATCAACTTCTTTTTTAATCATGAAGTTTGTTAACAGAATAT
GCATACAATCACTAACAAAGATGTTTGTTTCAGTTTTGTCACAATGACCCTTTGGTGGTG
TCCTTCTACCAGCTGTTTCACTTGATGCAAACAACTGCATATTTCCAGTAGCTATTGGCA
TTGTTGAGATAGAAAATAGGGATAGTTGGACTTGGTTTTTAAGCCGTCTTGAAGTGATGG
TAGGGCAACGTGATACGAACCTTGGGAAAACCACGC
>comp30_c1_seq1 len=303 path=[1107:0-302]
AAAAAATTCAGGAAAACCTTGGATTGTCAGTTGGAACTGATGTATCTACCTTCAACTTGG
CCATGCTTTCGGGATTGGATTGCCTAACCAACTCCGCATATTTCCTTAACTTGGGAGTAC
GAGTCTGCATGATTTCCTTGATGACTGATGTTGCTCTTTAGCTTTTCTTCTAGCTCGATA
CATTTGTGATTTAGACACCTCAACACCATAGTTTCCGGCATATGTGCAGCTATGAATTCA
CATTTTAAGTTTGGATCGACCCTAAATTTATTTTCCATTTTCTTGGCAATCCATGTTGAA
GTG
>comp31_c0_seq1 len=344 path=[676:0-343]
GAGCAATACCTGCATCCCAAAATGAAAGATAAGAGGTACATCTACAACTTTCCTGGACAA
TGGTTCTTGGACGATAAAAATGGATGATGGTTCTTGGACGGAAGCAATGGACGATCCTCC
GTTGGACAGACTCTCTCTTTTGGACGAAGCTGCTTCCATTGGACGGTCCAACATTTCATT
GGACAAAGCTGCTTCCATTAGATGGTCCAACATTTCATTGGACGGAAACTCTCATTGGAC
AGACTAACGTCTCTTGGACGGACCCTTATCCATTGGATGGAACTATTGGACGCAATAGCG
CTGAGCACTGTTGAAGTTGTACTCAGCATGACCTTCATTGGACG
>comp32_c0_seq1 len=644 path=[986:0-643]
CTTTTGACCATATGCAAAACTTATGAAGCTACCTGTTTATACCTCATACTTTTTTTTGGT
ACTTATGGTTTATACGTCATACTTTAACCTTTCCCAGGAATAGCAATATAATTAAAGTTG
ATCGTCTCTAGCTCTAAGAAGATATGCATATCCATGTTGATCAGCCAATAGCAGCACTCC
TCACCAATATTTCATCTTATTCCTAGAGGGCAATGGCTATAATTTCTTTAAGACTGGTTT
CATTTCTTTGTCTCCTTGTAATTCTCACCGCCCAGCCAGAGTTCCGATACGACTACTGTT
TCGATAATAAAGGTAACTATACAGCTAATAGCACCTACCAAACCAACCTCAGCATCCTTC
TTTCAAACCTCACTAGTACCACCAACACGGAAATTGACTATGGCTTCTACAATGTCTCTT
ATGGCCAAAACTCTGACAAAGTTAGCGCAATTGGGCTGTGCAGAGGAGATCTTAAGCCAG
ATATTTGCCGTAGTTGCCTCAGAAATTCGACAATCCTTCTCCCAATGCTGTGTCCAAATC
AGAAGGAGGCAATTGGGTGGTATGACGATTGCATGTTACACTACTCGCACCGTTCAATAT
TTAGCACAATGGAAACTTCACCAGGTTTCTATATGAGAAACGGG
>comp35_c0_seq1 len=447 path=[425:0-446]
GATGTTGGGCCAATGGTAATGCTGGCATTTTTCTGGCCTTAAGGGGCTCGGTACATTACA
CATGAAAAAGAAAACATAATGGCTTAAAAATATTGCAAGTGCCAAGCTTTCGTTCTTTTT
TTTTCCATGAATATTAGTACTCGAACAATAGCAAATGATGGGCCAAAAAAAAAAAAGAGC
AGATGAAGTCAAATTAGTGCTGTGAAGACACAAATAGCTTTTGGACCAGTAAACCGGTTA
TCTGCACAAAGGGAGGAGCGCATAATCAGCCCATAACACCTAGGAAAAACTAGCAGATAG
ATTCTACAACCGGACCCTGGTTCCAGAAAATGCAGAAAAACGAGTTGTTTGCTTGGGCAT
TTGACTCTTTGCAAATTGATTTCATAAATCTGACTTTTTTTTTTTTGACATGATTGGCAA
TACAGGCACTGCCATTGTTCCAATAGA
>comp35_c1_seq1 len=327 path=[849:0-326]
AGCCCCTTAAGGCCAGAAAGGCCAGCATTACCATTGGCCCAACCTATCCGAGTAATATCC
CTTCACGTGTGACTTACCTATTGGAAGGATGTAGAACCTGATGCAATGACCCCTACCTTT
GTTCGCATTTCCATAGTTGCATAATGTAATGAGGGGTCCCATGCCAAAAGGGATCACTCT
ACCGGTAACAAACTTTCTTTTCTAGGTGAGATTAAGATATATAAGGAAAGAAAGGCAAAT
TCCACAAGGTAAGAGTTATTTTAAGCCTAAATACCATTCCCTTTTTGGATATACTCTAGG
GGTGCTGATGACCCGTCTTGACTTTGG
>comp38_c0_seq1 len=314 path=[491:0-313]
GATATTTTCAAGTGTATGGCACCATACCTGCTTTTGTCATGCGTATTTTGTTGTCTGATC
TCTACATCAATCTTGAAAGTGAAAGTGGAGTCAGATATAGTTTACATGTCATTACTTTGA
AAGATAAGACACTTCTGTGATATGACAATCTGGGAGGATGTGTTTTGCATGTTGGTGTCT
TTTGTCATGGTTGCATAAACTATTTCTTGTTTATTCAATTTGAAGCATGAATAGATACAT
TCGCTATCAATGGGTATTACTTTGCAAGAGTCACTCAGAAACATATTTCATACTGTAAAT
AAAATTATTTTATT
>comp39_c0_seq1 len=471 path=[975:0-470]
ATTTTGGACCCAAATCCAGAAAATGTAAGTGTAGGCTTTGCAGAACAAGCTATGGCCTTA
AGAGTTTTGAGACAGCCTTTCACTGTCAATTTATAAATTAATGTTTTCTGAGCACAGGAG
CAAAAAATGAGTTGGGTCTCTGATGTGGTTCATGTTGTGTTACAACTTACAACTTACAAG
GCATCTAGAAAGCCTAAGAGTGTGATGATATGTAGTTTTCAAGCATGATTATGAACTATA
TGACTTTCGTCCTTTAAAAATAAATGGAATAAATTTTTTGTTTGATTGAACAGACCTAAT
AATCTTGGTGGCTTTTCTGTTGTGGCATGTCATGGTATTTCCCCCTCTCATTTGGATATC
AAAACCAATATTTTTTTTTAAACTTTCTTTTACTGGTAGGCGTAATGATGTTTAGTGTGA
TATTTTCCTTCAAATTGTTGATATATAGTGCTAACTTCTTTATTTAGACTA
>comp41_c0_seq1 len=366 path=[344:0-60 405:61-365]
ATAATAATAATTTATTTAATAATTGTAAACATTGTAACTTGTGGCATCCATGCAACTTGT
AGAATGTTCCTATTTTTTTTATGCATTTAAAGTTTAATGTTAGTATTCTGATAATTACTG
GTCTGATTTGTTGATTTTGCTATTAGACCAATTTGCTGGTTTACTGGTTTCTCAATTCAA
TCCTGTAAGTGGTACCGCAACAAATGCTTCTGGAAAGCAACCAGAAAATTGTTTTATTGG
CAAGACTTGGACTTTAGCTTCATAGTTTGTTTAATTTTCTTTAAGTACATTTAGGATGTA
CTGTTGTAAATGCTAGAAACTGGAGATTGAATGCAAACACAATCAAATTAGTGTGTAGCT
CTTGTG
>comp42_c0_seq1 len=647 path=[625:0-646]
ATGGCTTCAGCTGTTCTGTCTTGATCTAGCATTTTGGTTTTGTCTCTGTTTCATTCTTCA
GTCATTGACCAATGACCAGAATCCTTTACCTTTTGGTTTTCAATTAACCATGGCTTCATG
ATCATTGAAGAAAATTGACATTAAACCATGAGTACCATGAGTATGGTTTTGAGATTTTGC
TTTGGAATTCTCAGAATTCACTAGCAGTGAACAAATGTTTGGAATTAAGAATCATACCGT
ACCTCTGTTAGATAGAATTGCACCAGTTTATTTGGTGATTCTAGATGTTTTATAGCTTTT
TTTTTTCCTTGTTATGCAGAGGCTAAAAAATCTGCATTGCTATATATTGTTGTTTTTTCT
TAAATAATCTGTTTCAGTTCAATCCTGAAAGGTCGTTAAATGAGCAATTCTATAATTCCA
AAAGTTGGTGCACTTTGGATAGTGGTTTCCTCTGTATTATGAACTCTGTTCAAAAGATTA
TAATAATTGGCTTGTGCCCTTTCCTATAAGCCCTCCTTACTTTGGAGTCCATTTCTTGTG
GCTGATAATTTTAATAATTGAAGGCAACTTTTGAGCTTTCACAAGTTTCTTTAACTGTTT
CACCATTTTTTAAAATTCAATCCATTCCACTGGTTGTGGATTGTCCA
>comp43_c0_seq1 len=309 path=[219:0-308]
GGCAAGAAAAATATTTCTCCACTGATTAAGACAGGAAAGCATTTATTGGGTATGTAAAAA
ATTTATACGAAGTTCTAAAATAAAATCATATTTTTTCAATTAAGTGAAAAAGGACCCGAT
ATATTAAAGCACAATGTAGCCATGAGAACAATGAGTTGAATTGTTTTAAGCAGAGTTGCA
CAATTTGCTCAGAATGCATTCAAGAATCAAGACACTGTTCCCACCTGTCAAAACCATGTC
ATACTTGAAGCTCCAGCAAAACTGAACCCAAATTAAAAAGTTCCAATCTTTTTTTTTTCT
TTTTTTCTT
>comp44_c0_seq1 len=350 path=[1:0-349]
AAAAATGCATCCTCTTTGCTACCTGTACAGGAAAAAAATTCAAGTTCAAGAAATCATGTA
TGTAAAACTATGACAAATGAACAGCTAGCTTAGATATGAAACATTTGATAAAATAATTCA
ACAAACGAATAGCAAAAAACAGTTAATACAACCAATTGAACTGACAAGATTGCTTCTTGA
TTTTGGAATGCTACAAGTAAGAGGTGGGCAAAGACACAAACTCTTATTCCCAACCACTTC
ATCCATTGATGAGTAATTCATAAGGACAAAGTAGTCACTCCAGTCCTTTACTTTTGGGGG
TTATATAACTGGTATGCAACTACTTGTTATTTTATTAGGTCACTCTGACA
>comp44_c1_seq1 len=757 path=[1389:0-756]
ATCATGCACCATGGTTATTTCAGTGACACAGTGTTGGTTGAATTCATGATATGCTCTGGT
TGCTACTTGTGAATTTAATTTCATATGATGGAGTTTTTTCTAACAGATATCTTAATTGTA
TTGACTATTGTTGGTGGTAGATGCTTATAAGTGACAATATCAGACAATAGTCCTTGCCTT
TGGAAACTTTCATCCTTTTGGGAACAGTAGTCCAGCACCAAACTGACGATTGAGTATTAT
TATGTTATGTTCGAAGCCTACTTGAACTTATGGACCACAATGGGATGAGCATGTGAGAGT
TATTATCAAGGAAGAATAGAAGATATTTCAATATCTTGAAATTAGATGAAAGAAAGTTTG
ATATTCAATAACAGATGAAGATAAAATTGTGTTGGTGGTTTATGTTATCTATAATTATGC
TTTCTTTTAGTAACTAAGAAATAAGGAATAAATATTGGGTTATCCAAAGTCTTTAATCTG
TCTTTTCTGACCAGTTCCAGCTTTCATTGCTCCGGAACTACATACTCTGTTGCTTTATGT
TTGGTTGGGTCTTCCTGGCATGCTAGAACAGAAAATAAACTTGATTGTTGCTGCATATAA
ATGATTCTCACATGTGGCCTAAAATTGGTTCAAGTACTTCTTTACACAAAGTGAGAGTCT
CTTTGTGTTGTGATTGAGATGCTAGATTATGTAACATGGATGATATTATCTTGATGACTT
TCTCCAGAAAGTTCTACCAACTATAACTTGTCAGAGT
>comp45_c0_seq1 len=1293 path=[1:0-1292]
ATGATTTTATCGCTTTATTACACATGTTGTTTCTTTAATTCTATCCTCTGTCATAAGTAA
ATATCATTAGATGTGTACTGAATTGAATCTGAAATAAGGCTCTTCACTTTTGGTATTGAG
AGTTGAAGGTTCAAAATTTGCAGCAGTGAAGTCTTGTAATGCAATTAGTGGAGGACTATT
TACTTTAAATGTCACTATACATAATATGCTCTCTAAAGGGTATGTCTATACTAGTTGGCT
TTGGTCCAAAATGTGAGGGACACTCAGTGCGCGCCCAGCTCAAACTTGCGACCAGTCGAA
CGAGCTTTCATGCTCAATTGTGATGTTTGGTAAACATCATGTTTAGGCGTCTCTAACGCA
ATTTTGGCCTGAAACCAGCATTTGAACAAAAGTAAGATTGGGTTGCTTCTGCGATGTTAA
ATGCAAACATTGGGAAATTTTATGGCTAAAATTGAATGCTCCAACAACCATCTTCCCACT
ATAGCATTGCCTTCTCTTCACTGCCTTCGCTTTCCAGCCTCTTCCATCGTCCATATAATG
AACCTCCCTGTTCCAAGTCCTAAGCTCTCTTCCATGTCCGTGCGCTTCCAGCTCTCTCTT
CCACTCTCTTCTGCTGGTGCTGTGCTTCCAGCTCATGCTGCTTTGTGGCCCCTCCCAGGT
CCAGCTCCTGCTCCCACATCATTTCCCCCTTCTCAGGTTTGAAACTTTCTGCAGATTTTT
GGTTCTGAAATTTTTTGCTTTCTGGTTTCCCCTTCTCGTGGTCTTCTACTATTATTCCTT
TACTTCCCAAATTCCGTAAAAAAAAATTGTTGGTTGCTCTGGATTAGTTCTATGTTTCTT
TCTCCGAATCCCTAAAAATAGTCTTTTTTCTTTCATTTGAATGGCCATTAATATCTGTTA
GCATTATCATGTTGTGTGCATTTGTATTATTATGTTGTTCATTTTGAAAATTATCCAGCT
TTTGGTATATTTTTAACCTTTTTTTAAAAGCTGCTATATAAGTGGTACTACTGGACCTTG
CAACGTGGAAATCTATTTCTTGTAAAAATGGTTGTTGGGAGTGGGAGTTTACTGATTGGT
TCTATCTCTCTCTCTCTTATTGATGTGTTTGTAAAGAGATGAGGATAAAGGGTCAAATAT
GTTTATTTAAATTGGGTTTTGTACAATTCTAATGGGATTGTTTTGTGTTTTTGGAACTGG
GCTGAAGGCATGTAGGGAAATGTATTTTGAGGCTCGTGCGGGGGTTCTATGGGACCTTTT
CATTAGGATGTTCTGAACCAGAAGACTTGACCA
>comp45_c1_seq1 len=304 path=[2542:0-303]
AGGATATATTAAATTGTAGATATACATTAGCTCTGCTAGGCAGGTTCATCCACAGAAGCA
CACTCTCAATCTAAATGACAGCCAAAATGTTCACTGGCAATGCACCACAAAAAATGTTCA
TGGAAATCAAGGAGCGTTTACATGAAGCTCCATTTTTTCCCTTTGTGCAAAGCACGTTTG
CGTTTGAGAAAATCTCAAGCAAACAGGCAGTTATTAGTTTCTTCATGCTGCTCCATCCAC
TATATATTGGAGAACTTTCAAAATGTCCAGGTTTTCCGTTCCCTTTTTGGTCAAGTCTTC
TGGT
>comp47_c0_seq1 len=1252 path=[1230:0-582 1813:583-1251]
TTCTCTGCCATCAAATTCCTCCGGTAAGTCTGCAGAGGAAATTGGCTATATAACTTATAT
TAGTTAGTGTCTACTGTCTAGTAATTGTCTTAAGTTCCTAATCCCTTATTTTGAGCTTCC
AAGGTGCAGATTCTAAAACCTCTCCTTAAGTTAGAGATGCAGATAGCCTAGTAATAATCC
TAGTATACAGGTTTTTCCCAGACACAAGGAAACTGGTGGTGAAAATAATATTCAGTAGTT
ATTCGCAGCAGGGTAGTATCTATTCAAATAATATTGTATATTGTAGTCTAAAAGATCTTT
GGATATTTATTAGGATTCTTGGTTCTATGATAAGCCAATCAAAGGTCATTAATTAAGATT
TGTTGTAGTTAATCTCATAATCAGGGGTCAGTGTAGTTATAGTCAAAAGGTCAATCAAAT
GTCATTAGTAGAGTCACTTAAGAGTCCAGTCTGTTCTACAGCTATAAAGGTCTATATATA
AGGGTTGTTCTATGTACTCTCTTTTTTTTTTGGAGTGATTAATGAAGTATTTTAGTCTCT
ATTTTCTCTGGTTTCTTACCAGAAAGCCGAAGCCTATTTCCTTCAGTTTCAGGCCAGATT
TCTGAACAATTCAGTCTGTCCAGAGAGGTGGACTCCTCCCATACACAACAACTTTCCCTT
TATCCCAGTTTATTCCCTTCATATAATCTTCAATTACCTCTCCCTTAATCCTATAGTTCA
ATTAAGGTTAACTGGATTCCATCAGTTAGGTAACATTTGAAAAGCGTTGCACCTTCCTAT
GTTGAGACAAAGGATTAGGCTTAAACTACATTATGTTTGGAAAAACCAAATGATTAACTT
GTTGGAGAACTAGAAGTTTTCTATCTTTTTAACTTCGTAATTGGGCCTTGCCATTTCTAG
TTTACCTTGAAATACATACTGAATTAAAAATAATTACTCATGCAACTGGTAAATTACCGT
TAAAGGAAAATGGGGGATTATAGGGGAGGAGTGAGAATAAATAATGTATCAAGACGTGAT
CTAACAGCTTGATATTTGATTGTCTTATTTCCCATTTCCAGTCCTACAAGCTTCCCGAAG
TGGACTCTATTAATTATAATAGTTTGTTATACCTTTTTGTGGGTAATAAAATAACTTTTT
GAGACAAATAAGAAATGTTTCAGCAAAACTTTCAACATTTCAAGCAAAATAAATCTTGAA
ATTGGCCTTTTTTTTTTGGCAAATTCATTTTTTATTGGCTGTGCCAGATGGG
>comp49_c0_seq1 len=360 path=[1:0-359]
CAATAGAGTTGTCCCTGAAAGTTTGAGTCCAACCAGATGATTCTTCTGTTGTGTCATCTT
TGGTAGAAACACTTTATTTGGGGAAACGCTTGAATTTCTAGACATTAAGATCAAAGAGAA
TAATATATAATTTTCTTAAGCTATTCTAGTGATGAAATTGTAGTCACTAAAGTGAAATGG
ATTAGGAAGTACCATAAGAGGTTGCTGATCCCAAGCTGAATCATTATTTAGTCCAGCTGG
TGATGGAGACCATCTTCCTCATATAATGTTTTGGGTTCATCAAGTGCAAAGTCGCTGGTA
TGGACACCACAAACCGATGATTTCTGAACCAATTGTAGATAATACTGATTTGGGAGATTG
>comp50_c0_seq1 len=362 path=[340:0-361]
AAGTGTTATTCACAATGCCTCCTGCATGTAGTGATAAGAGTGAGAGAAAAATTGGCTGCT
GGGGGAGGGAGAGACAGAATGACTTTTTTAATGACCTCTATGCATGAACAAAAATATGAC
TGAAAAGCATAAATCACACTTGCTCTAGAGAGGTTAAATGCATTATTACGGGAACACATT
CATAAATGCAAAATGAAGGCAAGCAAGGGAAACATAATTTTATATAAACCATCTGACACA
CCAACTTAGTCTTTAAACATCAATCTCAATCATTCTTAAATTTATACAAAAAAACTCTGG
CCAGACATCACCTAGAGGATTTGTTATGAAACTGATCCTATCTGGAAAACAACAGAAACT
TG
>comp51_c0_seq1 len=328 path=[1043:0-304 1368:305-327]
TGTTGCTTTAATTTATGCATTTGTTGGTTTTCTTAGTTTTGTTTGTTTGATAGAATATTT
GCATGGCATAAGCGAATGCACATGAGAGTGCTTAAGTTAGGAGTGAAAACTGAGTGAACG
AATGGCTATTTCAGACATATGAAAGTGGCCTCTTCCTGAGTTTTTATTCTCCAATTTTTA
CAACTGATCTCTCTTGCTAGCATGTAACAATCAACTGGTGTTTCATGTTTTTGCATTTTT
TTTTGTTTATGAATGAAATGATTTTCCCATGTCTCAAATTGTTCTTTCTCGAGATATTTT
GCTTTTCCTGGCCACTCGTGGTCAAGAA
>comp51_c1_seq1 len=381 path=[359:0-380]
CAACTGAAACAAAATCATAAAGGTAGTTTTTTTTTTTTTAACTGATTTTGGAATTTCCTT
CCAAAATTATGAATTTATTATTCATGCATCTCCCTTGTTATTGACCTAATGACCTTCCTA
TCGTGCATTTCGTAATAGTAAGCAGAAGAAAACTTAGATCCAAGAATGATCATAGTGCTC
TGCTCATAAACATGTCAATGCTAAGTTGAATTAGCATCCGGTTATTTTAAAGTAGAATGA
ATAATTAAAGTTGCCATAATGCCTAGTGGGCAGAGTGGTTACTCAAGTAGAATGTAGATT
TGTGTTTTCTAATAACTTTCCGTTGTTATACTTGTCTAGCTGCTGTCCTTTTCTGCTATT
GTCCCTTTCGTAAACAATGTG
>comp53_c0_seq1 len=416 path=[341:0-415]
TCTACAAAGAGCTTATGATCAGGTCCACCCATATTTCAGTATAAACTATCATAATAGCTG
ATATTTGTTGTTCACAGACAATCAGAATTTTCTAGGAGAACAGCATATTTGTAGTTGAGA
TTAATTATGAATTTCATGTTTTCTTTACAAAAACAAAAAAAAGAATTTAATGTTGAGCAT
AAAGGGTGGACTATATCTAGAAACCTGTTGAGCAGTTACCAGTACTATTATTATTATTAA
GAGAGAGATAGAGAGAAGGAAAGCGGTAACAGTACTACATATATGGTACATGCTTAGGCT
GCCAAATTTCAAGGACTGAAGGAAATTGTACTTTGTGGACCTTCAGGAAGTCTGGTACTC
AAGGATCTGAGTGTTAGGAAAATTATGTAACTTTAGAAAGTAAATAGGTATCATAG
>comp54_c0_seq1 len=346 path=[837:0-345]
ATGCAGCAACGGTATCAATCTGCTAATGCGTGAAAAGAAACAAACCACTGTAACTATAAA
TTTATAGAATTCTCAAACTATTTTACTTCAGTACTCAATAAAAGGAAGAAATTTAAGAAA
AAAATGAAAAAGAGAAACAATCAAATCTACAATTGATGATATGTTACAATTAGTCAACGT
GGACAGCACATTCTACAGGTGATTGTTACAAAGAATTACATGCAGGGTTTTAGGATATCA
AATCAACGAGGGAAAAATAAAAGAAAGGATTCATGTATCAAAGAAAAACCCTACAGTGCC
CGAATACAGGATCCCGAATTGCCCGAATAGAAATAAAAAATAAGTG
>comp54_c1_seq1 len=441 path=[419:0-440]
CGAATAGAAATAAAAAATAAGTGTATATGTGGACCCCATGATGGTGGATCCCTTCCTAAA
ACCAACTTTTACATTATTCGGACACTATTCGGGCTACAGAGCTTCGGGCTCTGTAGCAAC
GCTCATGTTCAAATATAGGAAAGCTTGAAAATTTGATTCACAGCCAAAAAAATAAGATTG
AAATTTAGAAAACAAAACTGGCCGGAGATTGATAAACTAATTGTCGGACCTAATGTTTCG
GGGACGCTAAAAAGACCAGGTTTAGAGTGCACGTGTTCCACTCCAACCAAATACACAAAA
GAATTGGGTAAATTGCATGGTAGCTGACTCACTGTTTGCGTAACACATTATAAGGGAGTA
GTACCGAGCCAATGAATCTGAAGCTAGTCATCCTATTCAGTGCTGCCGTCCAAAGACTCC
AAACAAAAGATTTGACCTTAG
>comp55_c0_seq1 len=316 path=[1:0-315]
TCCACCAATCCAAGTTGTGGTTGAGAGAACCAGCCTCTTTTTGCCGCCAAACTCGTATGT
GTTATAGTTGTTCTCTATTACTATTTCTATCTCATCATTAACTTCAAGGTCAGCCTCAAT
CTTCCCATATAGTTTTCTGAAAGTGGGTAGTGCTGCTGTTCGCATCCAAACGATGAGATC
CTCTTGTTCACTTAAAGGTATGCTCTCATTGAGTTTTGCACCCCCAATCACACCTCCACC
CTGAAAATTTTTTGGATAAACATTAGACCCAAATTTCGCCCTTTGGTCACTTTTCCATGC
TATGTCCTTTTTGTTG
>comp55_c1_seq1 len=309 path=[587:0-308]
CAACCACAACTTGGATTGGTGGAAAAAATCCCTTCTTGGGGATGGCATATCTTTTCGTTG
GTGGGCTATCCTTGTTCTGCGCTATAGGATTCATACTTTTGTATGTGATTAAGCCAAGAC
CTCTAGGGGATCCGTCCTACTTGTCTTGGAACAGAAATCCAGGAAATATAAAATGATATG
GGATGATTCACATCTTTTGAGTTTGACAGTTCACTATCTTCCTATGTCATCTTGTTCTTT
GAGTAGCAAAGGCTCATTCTGGGACGAGGTTTGTTTGTACTTGACTAAGTGAAGAACTTG
AAACTTGAG
>comp61_c0_seq1 len=429 path=[253:0-288 10:289-291 13:292-428]
AGTCACTCTGTTGGCGAGGATGAAGTGAGCTCCTCCTTCAATTAATTAGTGTAGATTGTG
TTCTTCTTTCTTTTTCAATTTTCATTCTGAGAATGTAAGTACTTTGAACTCGTTATTATG
ATTTGCAGTAAAATTATTGGCAGATCAAGTTTCTTTTCATATTCTAAATCTCCATAGCTG
ACAAGTTTTATGCTGTTGACTGCTGGACTCCATTTAAGTTCTGCTAGGTCGTGATTTTGT
TTCTTCTGTCACTGATTTAGTACTTAAACCTGTAAATTTTTGTAGCTTATGTTAGAGATA
TAAATCATTCTTGGGCCTCCACCTAACCGCAAGTTGAGTTGGTTCTTGACATGATATCAG
AGCTTGTATGGCCAAGTGGTCAGAAGTTTGATCCTTGCTGCCCATATTCTTCATAATTAA
GTTGAATTT
>comp62_c0_seq1 len=356 path=[334:0-355]
AAAGAGGAATGAAAATTGACCAATATGTATCAAAAGTATTTTGATGTAAATGTGTATGAA
ATTTTTAATGTACCACAGAATTGGAAACAAGTACTCTTGGTTTTGTTCCTAAACTGTTTT
AAGTTTCAATCTAGTGCCTGCATTTTCAATTGAAGTGATTAAGTCCCTTGTGATTTTCTT
TTCTTCACTGTATCAGTCTAATCCACCAATTGCACACTGTTGCTACCATGTAACGAAAAG
CTTCTGACAAAGATTTTATTTTTCAATGTTTTCTATTTTGGTGAGATCAACATCTTCTGA
ATATGAAATATGCTTTCTTCTGGGTCAGGGGCTCTACAGTTGTTGCGACATAATCA
>comp64_c0_seq1 len=379 path=[1:0-378]
AATGATTTTTTTCTTTATCAAATGTCAATGACATGAACATATTAAGCTCGTTCAACCATA
ACCAAATGAACTAAAAAGAATTGATATAACTCAAGAATGTTAAAGTCAATGTTGTTTGGA
CCGGACCGAACCGGCAAGTCGAGCCGTGAACCGATCCCTCATCCAGTTATGATCTTCTAC
CAAAACTAAATTTATGGTTAGACTAAGATAAGCAAGTCAAAATTAGGCATAACCGGTAAA
CCGATCGGTTTTATGTGAAATAGTCATTTTTTTTTAATCTCCCAATTACTTGACTGCATA
TGAGACTTCAAAGTTAAGACTCCAAAACCTTATTATACATTTTATTATTTTATTATTGGT
AATATGTGCTATGATATAA
>comp65_c0_seq1 len=531 path=[509:0-530]
ATGTTTATCGCCGCAGGAGCAGTTGATGGTGACATTGATTTTGACGTTGTCTGGTATCTG
TGCAGGTTCATAATTGTTCACCTCGTTCACCCAGTCCTCGGTGGTGAGGTTGGAGAAAGC
AATCTGAGCAATTCTAGTATAGGTGTCACCGTGTTGGGTTGTGTAAGAGAAAGTGTGGCC
TAAAAAGACACCGTTCAAGCATTCACATGAGAAGGGCACGTTGATTCGGGTTTGGCTCTG
AACGAAATCTGGGTTTTTGACACGGGGGTTGTATTTTAGAACCTCTTGGATTTGCTGGCC
AAAGAGGTCGCTAATGTAAGTGAGATTTGAGCCTTCCCAGACGTAATAGGAAGCTAAAGC
AAGGTTGCAGCCAGACCTGCAGCTGGCTTGGCCTCTGATAATCAACAACAGAAAGAGAAG
GAAAACCAAGAAAACATGGGGTGGTTTGTTTAGCTGTGTGGTCATTTTGTGCAGAAGGGG
GTGGAAAAGGATTGAGGAATATGAGCTTAGAGCTCATTTGCAGAAGGGAAG
>comp65_c1_seq1 len=604 path=[1598:0-603]
CTGCTCCTGCGGCGATAAACATGTGTCCAAGTATTACGGGCTGTTTGCGACATACCCACT
TCGGCCCGGTGACAACTTGCCGGAGGTTGCGGCGGAATCCGATGTGCCGGCGGAGCTGCT
ACAGAGGTATAACCCCGGGTCTGATTTCAGTGCCGGAAATGGACGGGTGTTTGTGCCGGC
GAAAGATGAAAATGGAAACTTTCCACCTCTGCAGCTGAGATCAGGAATATCGGGTGGAGC
CATTGCTGGCATAGCGGTTGGAGGAGCTGTTGGGATCTTACTGTTGGCACTTATTCTATA
TGTTGGGCTATATAGAAGAAAGAAAGTGGCTGGGGCATCCCTTCTACCAGTCCCAGGAGC
ATCTGAAGATCAGTATATTCAACTCCAACATGGTTGTGGAATCATCTTGGAGAAGGCATC
AGAATCTTCTGTAGTTGCCTCTCCAAGGTTGACAGGTATTACAGTGGACAAGTCAGTGGA
GTTCTCATATGAAGAGCTTGCCAAAGCTACTAATGGCTTTAGCCTGGATAATAAAATCGG
TCAAGGCGGCTTTGGATCTGTTTACTATGCAGAGCTTCGAGATGAGAAAGCTGCAATTAA
GAAG
>comp70_c0_seq1 len=588 path=[1:0-587]
CTCAATGACACAAATCAAGAAGAAAATGAAAGGATTTACATGATTGGGAGAGTTCTGATA
TCTTCACACAATAAGTTTGAAATACCATCACATGGTTTTCAGGCATCCTCATTATCTTCG
TTCTCCTCCTCATCAACACCCTCCTCACCACCCTCATCACCTTCTTCACCCCCTTCTTCT
CCCTCCACATCGGCTCCATCATCCTCTTCTTCTTCTCCTTCAACCTCTACCACAACAGAA
TCATCTCCTTCGCTTACATCTTCATCACCTTCAACTCCATTCTCAACTTCAATATCTGGC
ACCAAGTAATATTGAAGAGGATTGGGCCACAAGTCATCCTTAATCAATTCAGCGACATCA
TCAGCAGAGGGATCCGAGTGATCAGTGAACCAATTGAAGAAGGTTTTAGTCTCCATAAAT
CTTTTCCTTCCCTTATTAACACCATTCCTTTCCTTATTCTTCTTGGAAAGATCGTTTTCA
CCCTTCCATTTGATTGCCGTACTTTGGGAGGCTGGGTCTCCGGACGATCCCAGATGAAAC
TCTTTTGTTAGAACCTCATTTTCAAAATATGGGTTCTCACCAAAATGG
>comp70_c1_seq1 len=372 path=[1503:0-276 1780:277-371]
TAAAAATGTCGGCCAGTGGGCCCTCTCCCAAGAAGGCTCGAAAGGAAGGTTCTGTGGAAG
GTGATGAGGGAAGAGATTATGATGTCGAAACACAAAAAGCGCTGGAAGAAATTGATGCTT
GCCAAAATGAGATCGATGTTTTGAATGAAAAGGCCAGCGAAGAGATCTTGAAAGTAGAGC
AGAAATATAACAAACTCAGAAAACCCTTCTTTGAGAAGCGGAATGACATCATCAAAAGGA
TACCCAACTTTTGGGTCACTGCTTTCGTGAACCACCCACAGATTTCTGATATTCTTGAGG
AAGATGAGGAAGATGCTCTCCACTACATGACGAAATTAGAGGTGGAAGAATTTGAAGATA
TCAAGTCTGGGT
>comp72_c0_seq1 len=412 path=[5:0-368 374:369-411]
ATCAATGTTTATGCATGACCTGTAATGGGTATCAATGTTTATACATGAACCTTAACGGGT
GGAATCTCCCATAAATTTCAAAAGACAGCAGTGTTGATTTTATTAAGATAACCTATGCAT
AAATTAAATATTCCCGAAATGATGCCCAGAAACAAAATAAATCTCGAAGTCAAAAATTTC
CCAGCCCTGATCCCTCGTATATATAGTTTGTTTTGTTTTGTTTTCTTTTCCATTTATAGG
CAGGAGAAAGCAGTTTATTGTGTCATTAACTAGACAATGCAAAAGCATACACGATGCCTT
TAACCTGGTAACAGGGTCAAACCTATATCACGGTCAATTTTTCTGAGGTCCAGGATGTAA
ATAACATGGGAGTTGCTATAGTACCCTGATGGGTTTGGTACCCAAGATGAGT
>comp75_c0_seq1 len=372 path=[350:0-371]
TTTACGAGATTCAACATTGACATGGTAGTATTCTGTCCATACCATTTGGGTGGGGAATAA
AGGATGGTAAATGTTTGAGTTGTATTGCTATGGTACCATTACTATAGCCTCTTTGATCAA
GGATGTGATCTTCATTTTCTCCCTTCTTATAATTAAAATCTTAAGGCATGGAGCCTTTTG
TTTTGTCCACTCTCCAAACCAATAGGCTGTTGCCTAAATGCCTTTGGTCCTTACTATTAG
CTTCACCTTTTAGTTGAGTGGCTTTTTAATGATTAATAGTTTGATGCCTTTGGCCCTCTA
AATCACGCTAATAATATGAATGTGTAAGATGCAGAATTAATCTTAGTCCATAAGTTCAGA
TCTGTTTAATAG
>comp77_c0_seq1 len=939 path=[1463:0-938]
AAGCATTCCTAGTGTCCGTATCTGAAACCAGTAAAACCAGATGAAGTGAGATGATCGCCA
AGGGATGAAAAGGAAGATCTCATATAGTATGAGAGCTGGGAAAGGGGGAACAATCTCAGA
AACACTCAACGTCTTTGATATTCATATGAATAATGAAGTTGAAATCCCAGCAAATCAAAC
AACCCTAATTCTACTAAAGAAAGAAACCCAATCTTGAGACAACCAAACATAAACTAGGAT
AACAAATCCAACTAGGAAAAAAGATATCCCAAGACCCAAACTCAAGTTCTAAAATATCAA
ATTACTAATAAATAAACCATAAATCCCACATTACAAACATTTTAAATTAATACAATAACC
ATATGTATCTCTCCTACTGCATTAAGACCAATAAAGCAAAGCATACAAACAATATGGAAC
CACTTTAGATGATGGAGTGGCATAAATGAAACTAACCATAAGGACATTTTAATAGAAATA
GAAATCATACAAAGGAAGAAGAAAGTGAAGTATAATAAGAAAGCTGAAATATATATGCTT
GACCATACAGATCTAATCAATTTTAACATAAACCCAGGTCATTTAATCACAATACAATAC
TATACCCATGGAAAATGAAACAGGAATATGATAATAACAAAAGATGCTAAAAGTAGGACA
AACTTAAATCAGAATATCCATCAAAATGAACTCCAATTCTACCATGTCAGGCATAAATAC
AAAACTTTGAAAATACATAAGCCAAACATCTCAATTGCACAGAACATTGGCATAAAAAAA
TCCCTCAATAAACCTTAGGAAAGAAACTCAATCACCTTTACAACTTCTCAATACAGAAGA
TTGACATAATTTGCAAGAAACATATTCAGGTAAAAAATATGGTATACCCACACGATGAAA
TTCAATGAATACTTAATGGTTGTATCTGATAAAACAGAA
>comp78_c0_seq1 len=316 path=[294:0-315]
ACTCATTTGGTGCAGCAGAGGTATATTGTTTTTAAATTCTTGTTGTGCATACCCTGCATA
CCTGTTCATATGATTATGGGTTCCATAGTGTTAGAGATACAAATCCATTGTTGAGCCTCA
GCCTCTACTTATTAGCTTAAGCTTTTGGGTTTAGTTGATATTTGACATGGTATTAGAGCC
TCGCCTCTGACCAAAGTAGTTAAGAGTTTGATTCTTGCCTCTCACATTCTTCATAATTAA
ATAGGATTTTAGCACAAGGTAAAGTGAACCTTTACATTGTCCATGCTTTAAGCCCAAAAT
GCTCTTGCGTGAGGGT
>comp78_c1_seq1 len=319 path=[587:0-318]
TTGTCCATGCTTTAAGCCCAAAGGCCAAAGGGCTCTTGCGTCGGGGGCGTATCCGAAATA
TAAAACCATTTCCAAGCTTTCATTTAATAACTTAAGTTTTTGAGTTGAGTTGGTCCAGGA
CACAGATAATTGCAGATTGAAATGAGCATCCAATTCAATTCCCTATCATGCTGTTGTGTG
TTTTTCTTGATCATGGTGTGTGTGTTGCGCTATCATGGTGTGTTGCGCCATTTATTGGTA
TGCTACATAATTTTTTACTTCCTCTTTAACGTATAACAAATAATGTTGTTGATGCAGTTG
AAATTCAGACATACTATAA
>comp79_c0_seq1 len=582 path=[1766:0-581]
AAAATCCACATCAGCCTAGAATCCTTAAGCAATTTTAATCATGTCATATCTGATCTCTTT
GGTAGCTTCATTTCTTTTCCTATTATTTTCCCACATCCCACTATTTTATATTGGTAGATT
TATTCTGCTTCTACCTTGTTTCATCTAATAAATAAAGGCTATAACTTGCATAATGGAGAT
TGTTTTCATAATGGACGTCATACATCTCCCTGTAACTGACTCTGTGTTTTTTGTTTTTGT
CAATGTCATTGTTAATTATCTGACAGGTGGAAGTACTATATCTATGAAGCAGGGGTACTT
CCGAAGCTCAGCCATATCTACAATAGATAAGAATCAATTTGGACCAGTAGCGTTGTTCTC
TGATACTGTTGGATGTGTACTGAGTAAATAGACTTCCTTACTTTTTTGTGTAGTTAAGTT
TGAATGGGCTTTTTTTTTCTTTTGAAGTTCAACTTAGGTACAGGAATGACAAGAAATTTT
AACACAAAAAAGCACTTCCACTTGTAAAGAAGCATATTTTTTTAATAGGTAAAACAGGTC
TATCTGCATATATTGGACAATAAAAATGGGCTCAACTTCCTG
>comp79_c1_seq1 len=626 path=[604:0-625]
ATTTTTATATCTGCATGACGCTTTAATAGCCCAACATCTGCCACTCCCTCTCCGACTTTA
ACTCAATGGCATAGAAATGAGATATTTTTACATACTCAAAAGATGTTTCAAAATGTTAAG
GCCACCTATGCACACACAAAAAGCTGATACAGCAAAGATAGAATCTTTTTGTATTGGAAA
ATATTAATAAATTACTTCTGTTTGTGATTTTCTTGGCTGTACAGCCAAAGAGCCTCGCTT
TTATAATCTAAAACATTAAAACAATAGATATTCTTCCTGAAAGGTCCAAAATCCAGATAA
TGAAAAGAAAGTGGCACCTGACAAGGAACGTAGCCTTCTAATGCAATTAAAAGGAATCAT
CCTCCAATATGCCTATGAGTATGGTTTTTACTTCAGATGATAACATCCTTTTGGGAAATT
TACCTTCAAAACATTGCTAACTCATGTCTCACAAAATTTGCATTCCATATACTGTCTTAC
ACCTACTATACCAAAAATCCTTTGATCCCCAAACACCAGAATATTGTTGCATAAAAATCA
ACTTTGAAAACAACGTTTAGAATCTACGAATGGGCTGCTTAGTTGCTGAAGCTTTACCTG
TAGCTGATTCCAAGATGTTTAGAAAG
>comp80_c0_seq1 len=601 path=[1:0-600]
GAGGAGGCTGCCAAGGCCGCCGAAGCCGCCGCCAAGGCAGAGGAAGAGGCCAAGAAGAGA
CAGGAGGAGCAGCAAAAGATCGCCGAGGAACAGTTAAAGAAAAAGAAAGAACAGGAACAG
CAAGAGCAACAAGCAGCCGCTGGCCAGAATACAACGGAAACAGCGGCGGCCGCCGCCACG
GAGGCTACCCAACAAACTCAAGCCGCCTCATAATGATTCTCCGACGATCATGACATGTAA
TGATGATAATAACAATCATGACTATGTAATTTTTCAATTTTTTCTTTTTGTAATCAATCA
CATCATTTTTCATCACACATACACATACACACAAACACTTACACAAAGATCAACAAACAA
ACCAACAACAATCAAACACCGAGAACATCATGAACTACTATTGAAAACCCCACATTCATT
AAGATGATACTTTAAATGTAATTGCAAAACAACCATCTTGAACAGGATGATCAATTTCAT
CAACTCAATACAAGATATGATAGTCCCTTTTTGAAAACCTAAGAACAAAACCAAATCATC
CCAGACGACAAAAACCAAACACGACAAAACTACACCAATTTTACATCATTATTTAGAGAG
A
>comp80_c1_seq1 len=400 path=[1157:0-399]
GCTCTTTCTTCTCTCGATCCAAATCAATACTCACCAATCGACGGCCACGACCAATAAAAA
CCACCAAACAAATTAATTAATCATTATAACATTAGATCAAGTAATTTTAAGTCAAAACCC
ACAAATAAGCTAACCAAAATGACACAAACTGAAACAGAGGCCCAAGTGGCCCAGCAAGAG
TCGCAACAGAACGAACAAGCCGCTGGTGACCAACCAACACAGCAACAAGACCAACAGCAA
CAACAACGGAAGTTCTGGACTTTCAGTTTTCTCAACAAGAAGGGACCAAAGCCTAGTGCC
GCCGCCAAGGCTCAGGCGGCCGCTCAAGCTGCCTCAAAGGCTGCCGAGGAGGCCGCCAAA
TCGGCTGCAATCGCCTCGAAGGCCGCCGAGGAGGCTGCCA
>comp81_c0_seq1 len=718 path=[1039:0-371 344:372-717]
CAGTGACTGATCCTTGGTTTGATCGATACTTGTTTCAAATTTAGAATTTCACTATTACCT
AATCACTGAGGTATTATATGTACTGAGATATTGTTAAAGATAGTTATTTAGAATATTCAA
ACCTACGCGATCATGTCGAAAACCGTGGATTTGGAGCTCAAAAAGGCATTCGCCGAATTA
CAACAAAAAATGATGGAAACAACACAAAAAGTTAAGCTTGCGGATATGCAAATCGATTCC
TTGAAAAGAGCGAAACAACGAGCTGAATTGACCACTCATGAAATAAAGGCACTTCCTGAA
AATACGACGACGTATGAATCAGTTGGGAGGATGTTCGTATTGACACCAACTCCTTCAGTT
TTGGAAAATCTTAGTACTAAATCGGCAACTTGCTCCGAAAAAATCAAAACTTTGGAGAGC
AATAAGGCCTTTTTGGAAAAATCCATGAAAGAGAGTGAAAACAACTTGAGAGAAATGGTG
CAGCAGAGGAAAGATAAACAGGAGAAATAGCCGATCCATCTATTTTTTCACACAATTATT
TCAATGTGATACTATTTCGACTATTATAATTTGTATAACTTACTCAACTACAAGTCTCTA
ACATGATAATTAGTTCGACCTGTGTTACAATTTTGTTTATTAAGGAATTTTAACGTTCAT
CCAACATTTTGCATAGGTACCTATTACGCTTTGTAAGTTAATAATAGCCTCAACTAAG
>comp82_c0_seq1 len=695 path=[911:0-694]
ATCTCGTGTCCTTTATATAGGGAATCAACATAAGATAATGCTGGGTTGCACTCTTGTGCC
TTCTGTACTTTAAAAAGAGACCAACATGTTAAAGTCTTCAGTGAACCAAGATTTTGTCCT
TCAATTGTCTAGAATAAACCATGCCCCCAAATTTTAGATGTTTGAGCCTTGTTAAATTTT
GAGGGCAGGGCTGGTTGATGTGAGTAGTTATAGTTTTATGAAGGAACAATCAAGCAATAA
ATTTAAGTAGTTTGTTTAATTTTTCTGAGGGGAGTGAGAATAGAAAGAAACAGTATTTTT
TTAAGTAATATGCAGTCTAAATTCTATGATGGGATGGAGAAGGTAGATAAAATGGAAACT
GATGATCGAAGACTATGAGAGCACTGGGATATTTGCTGCGGGTATGGGGGTGAAAATGTT
AGATTTTTTAGAAGGCTTCTTTGGCTTTATCTTAAACAAACAGCTAGTTTTTGGGTGATT
CTGAGGGAAGAAACTACTGTGTGCTAGCGTCTACATTGTCACCATGACTTCTACCATGAG
GTTGAGGGAGGGACTACTGGTTTGAAATCCTCTGGATCTGTACGTGTCTCTAAGTGTGGC
TTACTATCTACCAATCATAATGAATAAAAAAATTGAATATATTTTTTACATCCAAGTCCA
ATATTTCCTTACATTGTTGTTGGTTTTATGACCTG
>comp82_c1_seq1 len=455 path=[456:0-229 686:230-454]
GTGTCTGATAGTTCTCCACCACTGCCTTCCCGCTATAGTGGAACGTGCACCTTCAAATAA
ATATGGCCATCCCTCTACTCAACACATGCTCAAGTTTTAACTTTTAACTCCAATTTTCAA
TATACTTATGGGAATTGTGGGGAATGCTACATGCTATAGTGGTTAATTAACCAGCTGGAT
CTAATTCCCAAATCATGCCCAAAAGCAGCCTTGTACTTTCTATGTTTCTTTCCTTTTCTT
TTGGTTTGATGGGAGGGAGGTCGCCGCTTGACATATCTGAGACCTTAGATGAGTTTGAAC
CACAGACCAGTTGCATTCCCATGCCTGGACCTGTTAGTAACAGTTACATAGACCCTCTCT
AAGCTGCAGTGGCTTTAGCTTTGCACAACTCAATTCCATGATTCCAAAATACAGAAAAAT
GCGTACTGAAGGATCAAGGAAGAGTTAGTTTAACC
>comp85_c0_seq1 len=401 path=[609:0-400]
GAAGAAGAGAGGAAGACGTAGGAGATACAGTACATCTTCAGAATCTTCTCATTCAGATTC
TGTTTCAGACTCCGATTCTGATGATAGAAGCAGCCAGAGAAAGAGGAGGCACAATCAAAG
GCACTGAAGGAGACTAATGAATGTGTGGAGCAGCTAAGAGTTTGGTGAGTGGGTGACGAC
CTTGATCATTTACCAGCTGCTCATATGCTATCATCAAGTTTAAGAAGATGAAGTGCTTAT
TGTGATTTGAGTAATGTAGAATAAGCTTTGCTAGATGCCATGCTTGTATTTCTTTTCTTT
AACCACTATGTTACCCTGAAGATGCTCAAAAGTTTTATTTGATCTTTCACATTAAAATTT
ATGGACGTGCACTATGTCTTGTGAGATGTTTAAACAGCAAC
>comp86_c0_seq1 len=403 path=[381:0-402]
AATTCTATGTTCAATTGGGACGAATTTGATTGGTAATTCTCAACGAGAGATTGATCACAA
CATCAGATCCGAATAGATATGAAATTGGCGAACAAGAAAGAGAGAGAGAGATCGTACTAG
TAGAGATTGCACTTGAGGCGACTATCCCATTTAGGGACAGATTTAGGAACGGTGAACCTT
GAGAAGAACTCAGACGGAGGACGCGGCGGAGACGACCAGTCAACTTCTCGGAGAGCATCG
AAGAGATCATCAACCGTTACGTTTCCCCAATCCATAATCTCCGATCACAAAAACACAACA
CTTCTGATTCCACAATCCTTAGTTAACCTTATAAGAAAACAGGTACACAAATTCTCAATA
GAATCGATCGATTGAGATCAAATTATCAAAGATTCGTCGAAGA
>comp87_c0_seq1 len=451 path=[1:0-450]
GAAGGTGCCAGTCCTTGTGGTCTCAACTGCTGACGGTGCTCGTGAGGTTATGAAAACCCA
TGACCTAGTCTTCTCCAACAGGCCACCACGTAAAATGCTTGATATCCTCTTTTATGGTTC
CAACGATGTATCAGCTGCTCCATATGGCCAGTACTGGAGGCAGATAAGGGGTATCTGTGT
CTTGCATCTTCTGAGTACCAAAAAGGTTCAATCTTTTCGAGCCGTGAGAGAGGAGGAAAC
TGCCATAATGATGGAAAAAATCAAGCAGTGTTCTTCTTCTTCCTTATCAGTGAACTTAAC
TGATCTATTATCTTCAACCACCAATGACATAGTGTGTAGAGCGGCACTGGGAAGGAGATA
TAGTGGAGAAGGTGGGAGAAAGCTTCGGGTGCCGTTGAGTGAGTTGGTGGAGCTATTGGG
TGCTTTAGTGTTAGGGGACTACATACCTTGG
>comp88_c0_seq1 len=490 path=[1:0-489]
GTTCCTATAAACCTCGCCAGAATTTGACCGTTGAGAATCTTCCTCTTCACAAAAATCCTC
TCTCTCTCTATCTCTTCTCTCTGCAAGTAAAGAAAGAGAGAGAGAGGCCATTACTCTACT
TCTTCTTCCCCTGTTCCATAGAAACCCATTGAATTCAAGAAAAAGAAGCAGAAAATGGAG
CCACCACCACAAAGCAGGACCAGGAAAAGTGGGCTGAATCTCCCAGCTGGGATGTCCGGA
ACCTCTCTGTGCCTAGACACCTTCTCTGGCTCATCTTTCCGTGCCATGTCCTCCTCCTCC
TCCTCGCCTTCGAAATCTTCCAGCTGCAGCGACAGGTTCATACCCTGCAGATCATCTTCC
AGGCTCCACACATTCGGGCTCATCGACAAGGCATCGCCAGTTAAACAAGGGAGTAATGAG
GCCTACTCCAGGTTGTTGAAATCAGAGCTTTTTGGTTCTGACTTCGCTTCTCCTTCTCCT
TCTTCTTCTT
>comp93_c0_seq1 len=315 path=[495:0-314]
GGAAGCATTTTCTACTTTTACACTAACTAAGTCCTCATTCCCCATTGAATTTCATCTCAA
ATTTTGGCTGCTATTGAAAGGAACATTATATGGTGGGGTCTCTGCATATTTAGGTATTAT
GACTGTGTGTGCCTATAGTTTTGTTTTCTTTTAAAGCATCATACTACCTTGTTGATGTGG
AACATGAAAACAGAAGTCTGTGACAGAAACATAAATTTGAAAGCATATTTTAACAGAGTT
AATCTCAAATCATAATGAAGCATATCATAGGTTTTTTTCCCCCCGTCTAGTTGGGTTTTC
AGGTGTCAAACAACT
>comp94_c0_seq1 len=448 path=[778:0-447]
ATAATTAGAGTCTAGAGCACATTTAGCTCTAAGCATTCTCAAAAAGAAGCAAGTCTTGCA
TTGTTTGTGGGACTGTTATCTCTGTACTGTATAACAACCAGAACAAGCCCTCCCACCTAG
TGTGGTACAAAATATGTATCTGATTTTCTTGAAATTTATAGTTTTTATGTACTTTATTAT
AATAACATTTGAATGAATCTGTCTGTAATACAGCCAACATAATTTGATTATTTAATCCCT
GTTAATATATTCTGAGGCTTGGTATAGATTCATTTCATGGCACTTGTGATTTACTTGGTT
TGAGAAAGATCGGTGCAGAAAAATAAACATTATATGCACACACACACATATTGTACCAAA
CTCCAACTTAATTTATTTTTGTATGTATTTATTATTAACAGCAAGCTGATTCTTTTGTAT
GTAATATCTCAGTGCCTGCTAAAGCAGT
>comp95_c0_seq1 len=943 path=[921:0-942]
GGTATATTATATATATGAGCTTGTCAACAACTCAGTTCTTCATAGGCTGGAGTTAACAAT
AGATGGATTTAGCCAACGCAGTACCTGGAGTGTTGAAAACAAAGGTTGGATCACATTTGC
AAAGTTACCAGTGGATGACTGTGATTACTATGCAAAATGTGGAGCATATGCTATCTGTAA
TACATACAACTTTCCTGTATGTAATTGCTTGGAAGGATTTGTGCCTAAAGTCCCAAGAGA
ATGGAAGACGGAAGATTTATCTAGTGGTTGTGTCAGGAGAACTTCACTGAGTTGCCATGG
AGATGGGTTTTTGAGGTTTTCCGGGCTGAAATTACCAGACACAGAGAGATCCTGGTTTAA
TAGAAATATTAGCCTTGAGGATTGTAGGATGTTGTGCATGAAAAATTGCTCCTGTACAGC
TTATGCTGCTTTGGATATCAGTAAAGGGGCAAGTGGGTGTTTACTCTGGTTTGATAATCT
GATTGATATAAAAGACTTGACCGCATCTCATGAAGATATTTACATAAGGATGGCTGGGAC
AGAACTAGAAGCTATTGAAGGTAAGAAATCACATAAATCCAACATCCGGAAGCAAAAGAC
TATCATCATCAGCTGTGTGTTGTCTATAGGAATTTTAATCCTATGCTTAACCTTCATCAT
TTATAGATGGAAGACACGGCAGAAAGGCAGAAAGATGAAAGGAAATCCAGAAAGAGATGC
AAATGCAAGAAATGAGCACCACAGGGAAGATCTAGAATTACCCTTGTTTGATATGTCTAC
AATTACTTCTGCGACCAATAACTTTTCAACCGACAACTTACTGGGGAAAGGTGGTTTTGG
ATCAGTTTATAAGGGTATCCTGGAAGATGGAAGAGAAATAGCAGTCAAGAGGCTCTCAAA
GAATTCAAGCCAAGGACACCAAGAGTTCAAAAATGAAGTTATG
>comp96_c0_seq2 len=448 path=[1609:0-89 407:90-113 431:114-447]
GGGGGAACCACCAACCTGAACCTGTTATGAAGAAAGTACACAATAGATTAGTTTTCCAAT
ATATGACAAAAATTATTATTTTTGCTACATAAAAGTTTAGGGTGAGGGGAGGCTCTCCTT
ATTCCAAGGAGAAGACAAACCAACAACCTCAGCAAAAATTTACAATGAAATTACAAATCG
CCTACCAACGGGAACCTTGGATTCGAACCCAGGTCATGCAGTAGTCATGAGCGGAAGGTT
TACCAGTTAAGTCAACCCCATTGGGGGCAAAAGTTATTTACATCAAGATGCTCGGTGTAT
AAGCTGTAGCCCATCTAACGCTAAAAATATTAATAATAAGGTCTTCGCTGGAACAAAACA
AAACAAATCAATAATCAAATGCAACCACGCTGAGAGCGAAGCAGCGAACTAGCACTACTT
GGCATGCCACATGTTTACTCGAGTCGAG
>comp97_c0_seq1 len=391 path=[1:0-390]
TTATTCCCTCTAACTCCATTGCCACGTCCTTCATGCTAGGTCTCTCGTCTCCTTTAAGTC
TCAAACAACTTGCTGCAAGCACTGCTACTTCCTCGATCATCTCCTCATTTTCTTTATTCA
CTATGCCAATTTCAACAACATCAAACAAAAGACCGTGGTTCAAGGAAGAAAGGAAGTGCA
AAGCAAGGCTTCTTTCCTCTTCCGGCCTATCAAATGAAAGCGCTTTCCTCCCTGTTAACA
ACTCCACAAGAACCACCCCAAAACTATACACATCGCTCTTCTCAGTGAGTTGGTTCGTTA
GCATGTATTCTGGGTCCAAGTATCCAATAGTTCCTTGGACCATTGTGGCTATTTCAGTTT
GATCTAGTGGAACCAATCTTGAAGCTCCAAA
>comp98_c0_seq1 len=471 path=[1:0-470]
TTTGCTTGACGGATACCATGGAAAGGGACATAGATTCGTGCTAGCGACTGGGAGGGACCC
TGCTCTGGTGAACAAGGCCTGTGACTTTTTGAAAGACCATTACTTGGTTCCACCAAACTG
GCGGCAAGATGAGAACAAGGGCATGATCGTGAGCAATGATGGACGGTGGGTGCAGCCTGA
GCGCCCAAAACTTGACGATCACCCTGAAGATATGCATCACCATCTCAGGCAACTAGGTCT
GGCTTCATCTGATATTTGAACGGAGGAGACTGTGTTGTAGTTATTGGAGAAATGCACAGT
GTTCATAAAGTTATTATTATAGTAGTAATATTAAAGTGTAAAGGTTTTCTACGTAGATGT
ACAAGTGCAAAGGGATGTGATGTTTCTCGCTCAAAGACCGAGTTAGTTTTATCGTTCTTT
GGTTTATTGATTTATTTGAAGTTACTGATATATATGTATGCAGAAAGGTGG
>comp99_c0_seq1 len=439 path=[417:0-438]
AGATGAATGGAGGTTGGAGTGGTGACTGCCATGAACATTGGGGCATCCAGAATTGAGGGA
GAAAGAGCCATCAACTACTTCTTCATCGTCCTTCAAATCCAACCAGTCCAAGGCATCCCC
AATTTCAGAATCTGAAGAAGAACAACACAAAATATCTCCTTCTGTTACATGGCTATAATT
GAATAAGAAACTGTGATAATAATGAGCTGTGATAGGAGGTTAAGTAGTTACAAAATTAGT
TACAAACTGTTACATGTAGTTACAGCCACTTACAACTCCATGTTGTTATATAATGGATTG
AATGTACAAAAAGCTATGGTTAGATCAATTGAATACAGTGTCATTTTCTCTCTGAATTCT
TTCTATTTTCTCTTTTCCCTCCTCTATTTTCTCTCACCATAGCTGATATATCAAAGCTCG
ATATTGGCATCCATGGCGA
>comp103_c0_seq1 len=614 path=[567:0-613]
GGGGGGGGGGGGGGGGGAGAGCCTCTTATGAAATTACAATTGGCAAGCACGTTCTAGTAC
TAAAAATCAGTCATATACTGAGAATTTTCTATAACTCTGTTCATATGACATTGCAAAATT
CTTTCTTCTTTTTCTTGAGTGGGGAGGAAGGGGGTTGCTGCTCTAACATCACTAAATAAA
TAAAAAATCTTGAAGAAAATAAATATTTGGTAATACAAGATATCACCTTGATCATGATGT
ATGAAGCTTCTTCTAATATCAACCGAAATGCCAGTGCTGGTCATGAGCAAATTAGCTCTT
GGGACTTGAGGCTTTAAATTAAATAAATAAAGAAACCATTTTGAGCAAACTATCACATCT
AGGGCTCAGATGATTGCACATATCAGACAAATCCTGTGCAAGATGGGTTCAACACACAGC
CATTAAGAATTACCTTAAACATTTTAAAAATTAGATGAACTTGACGTCTTGAATCTGGAA
CTCCAATTTGATAAGACTTATTTATTTAATTTCTGAGTTTTTATTTGTTCCTATGGCATG
TTAGGAAGGTGAGCAGGTTTTAATAGTATGAAAACAAGTGTCTATTCCATCATAACCTAA
TACACTTTCATGTG
>comp103_c1_seq1 len=306 path=[1:0-305]
TGTTTTCATTCTTACGATATTAATATATACGTAACTATATAATTATTTTAGTATATTATC
TATGTTGAGTCAAGCCTTATATTTTGTACTGTGCTGTGTCCATGTCGTATCCTTCTCCAT
GGCCCATGTGATGTCTATGCTTCCTAGCTCCTGGATCTAATAGTAAAGATCCTCTAAAAA
TAAAACCTAAAATTAGATTCGACCTTCAAAAAGACGTTCAACTCATGTAGCCATCTTAGT
TACTAATTTTTCACCAGCAAAAAAGGCTTCCTGACTCATGGTTCATGGACTGGTTTTAAT
TCCAGG
>comp105_c0_seq2 len=731 path=[709:0-681 1391:682-730]
CCTAGCTTTCAGTACTTAAAAGATTCTGTTTCCAAATTTATTTATCAATAAAAGTCTATC
TTCATACAAGTGTGAGATCTGTGAATTGGCTAAACATCATCATACCTCCTTTCCCTTACA
ACCATATAAACCTTTTGAACCTTTCTCACTAATTCATAGTGATGTGGGGGCCTACAAAGA
GAGCAAGTCAGATCATAATTCCCAATGCCCATTACTCCCACTTCCCGCTCACTATACAAT
GGCTTATAAATAGGGGGATCATCCCCCGTGGTATAATTCAGACTCATCTCATTCACTTTA
GCCACCTTACTCACATATTGACTTAGGCGTCAGAGTATCCTTGCAGGTACCCCCACCAGC
GCTGAATCTTCAACGGGCTCAAGATTTATGTTCGCTAAGGAAGACCCTTTTTTCCCGACG
TGAACACTTGGTAATGGGAAGGATTCTCTAACTTGGTTATAAAGGATAAACTATATCCTT
GCACTCACTTGAGTTATTGCATTAGACATATGTTTTTGGCCTTTCTTCATATAAAAGAAT
AACAATTTTTTTTATTTATTTGATTTTCTCTTTTTCTTCTCTTCTCATTCTTGTTCTTCC
CTTCGCACCTGCACATGGTGTGACCACTGTACCTTTTTAATGTGTAACAAATGTTATTAC
AATGTGTTGTTGGACTCCTATTTCTGTTATTGATTCTTATCTCCAAATAGATCCTGCTAC
TGCTGCTGCAA
>comp107_c0_seq1 len=308 path=[337:0-139 147:140-307]
CTCATGTGGACATTTGGTGAACCCGTTTTCTTGGAAGTACTTATCAATCCGACTGTTCCA
TGCTCTTGGCGCTTGCTTCAACCCATAAAGTGCTTTCTTCAACTTGAGAACTTTGTCTTG
TTGTCCTTTCACCTTGTATCCCAAAGGTTGCTCGATGTACACTTCTTCCTCGAGGACTCC
ATTCAAAAAGGCTGACTTCACGTCCATCTGGTGAATTCTCCACTTGTGTTGAGCTGCTAA
AGAGATTATAAGTCTTATGGTCTCCAGACGGGCAACCGAAACAAACACCTCATCATAATT
GATCCCAG
>comp110_c0_seq1 len=1264 path=[3300:0-1263]
GTTTATAAACTCCACAAGGCTTTGTACGGCCTAAAACAAGCACCACGAGCTTGGTTTAAC
GGCATGGAGTCTTACTTTGTTACTGAAGGTTTTAAAAAAAGTTAGAATGAGCACACACTC
TTCTTCAAATGGAGTAAGCTTGGTAAAATTCTCATCATCAATGTTTATATAGATGATCTC
ATATACACCGGAAATGATGAACTCTTGATGAACGACTTTAAGAAATCTATGCAAAAGGAG
TTTGACATGACAAATTTAGGGAAGATGAGGTTTTTTTTTGGGAATTGAAGTGATGTAGTG
TTCAAATAGGATTTACATATGCCAAAAGAAATATGCTATGGAGATTCTGAGGCGATTTGG
CATGGAAGAAAGCAATCAAGTATGCAATCCTATTGTGCTCGGTTGCAAATTATGTAGAGA
TGAAGGAGGAGTCAAGGTGAATGAAACTTAGTTCAAACAAATGGTAGGCAGCTTAATGTA
CATTACAACTACACGACCAGATTTGATGTTTGTGGTTAGCTTGATTAACAAGTATATGTC
TCAGCCAATAGAAATGCATGCTAAAGTGGCTATGAGGATTCTCAGGTATTTGAAAGGTAC
TAAGAACTATGGAATTCTGTATAAAAGAGGAGGAACTGAGGAATTACTGGCTTTTACTGA
CAGTGACTATGCTGGAGATGTGGAAGATAGGAAAAGTACATCAGGATGTGTTTCTAATGA
GTGAAGGCTCTGTTGCTTGGTCTTCTCAAAAGCAACCAATTGTTACACTCTACACAACAT
AAGCTGAGTTCGTTACAGTAGCCAGGTGTGCCTGTCAAGCAGTCTGGATGAGAAGGATCC
TGAAGGAGTTGGGCTATGATCAAGAAGGAAGCACAGTGATAATGTGTGATAATTGTTCTA
CTATAAAGTTATCCGAAAATCCAGTTATGCATGGGAGGAGTAAGCACATAGATGTGAGGT
TTCATTTTCTCTGGGACCTCCACTAGAGATGGAGTAATTGAGCTAGTTCACTATGGAACA
CGAGATTAAGTTGCTGATGTGATGACCAAGCCTCAAAAGCTGGATTCTTTCCAAAAACTT
TGAATGCAGCTTGGAGTGTGTGAAGTTCGAGAATTAAACAAACTACATAATTGCAATTAG
TTTAAGGGAGGGTAATTTGTTGAGTTTGTTACTTATCTTATCTTTAGGATTCTGTCTAGT
TTGATTAGAATGTTACCTGTTATCCTTAGTTATCTTTAGTAATCTCCAAGTTATCCTTTT
CTTT
>comp110_c1_seq1 len=1052 path=[1030:0-1051]
CGTTGGCAGAGAAAAAGGTTCTAAAGGCTTTCTGGCCTGAAGCTGTGAAGTCGACAATAT
ATGTTCTTAACCAATCTCCCACATTAGCTGTTAAAGGGATAACACCTGAAGATGCTTGGA
GTGGTGAGAAACCTTCAATTGAGCATTTTAGAGTATTTGGATGTGTGGGGCATGCACATA
TTCCAGATGCTAAGAGAACAAAGCTGGAGAACAAGAGTGTTAGATGTGTTCTTCTTGGTG
TCAGTAATGAATACAAGGGGTACAAGCTGTATGATCTTGTCTCAGAGAAGGTCTTGATAA
GCCGAGATGCTATCTTTGATGAGGAAAAACAGTGGAGTTAGGATGCAAGCAACAAAGAAG
GGTTGCAAGAGGACTTAGAATGGGGGGATATTGAGTTTGAAGATGATAATAGTGAACAAA
TTGATACAAACACGATTGAGGAGGGAGAAATAGGTAAAATTGATCATAATGAAGCTCAAC
ATGACACAACTCAGAATGTTATAGGTGAAGAGGGCAAAGTGAGGCCTGCTCCGGGGTGGA
TGGAAGATTATGTGTCAGGAGAAGGACTGTCAGAAGGAGAAGATGTCATTAATATGGCTT
TAGTAGATTCTTCAGATCCAACATGTTTTGAAGAGGCAGTAAAAAGTGCTAAATGGATGC
AAGCCATGGAGGTTGAGATCACAGCTATAGAGAAGAACCAAACCTAGAAATTGGTTGAGT
TACCAAAGGGTGCAAAGACGATTAGGGTCAAATGGATATACAAAACCAAGTTCAATGAAC
ATGGTGAAGTGGATAAATTCAAAGCACGACTGGTGGCTAAGGGATATTCACAAGAGCATG
GAATTGACTACAATGAAGTTTTTGCACCAGTTGCTAGGATGGATACTGTTAGAATGGTGA
TAGCACTTGCTACACAAAGATGATGGAAGATCTTTCAACTTGACGTAAAATCAGCCTTCC
TACATGGAACCTTGAGTGAGGATGTGTATGTTGAACAACCAAAGGGATATGAGAAGAAAG
GAAGTGAGCATATGGTTTATAAACTCCACAAG
>comp112_c0_seq1 len=726 path=[316:0-307 624:308-314 635:315-725]
AAGGAAGCTAAGAAAACAAGCCTGACCCATAAAAGGTGTGGAGGAAGAAACTTAAGGCTA
AAAATTATGGAATTACGTTCCAGCCAAATAACTGATACTCCAGCAAAAGCGAGCACAATG
TCCAAGCACCTTAGCATCCCTCCTACTCCCAAAACCTTATCATATTGCTTACCTATTCTC
ATATTGCTTTGCTCGAAGCACTCGCAAGTGGATATTGATGGGTTTCCCTCTGCCAATGCC
CTGACCCAGCTGGAGGTTAATTTGCGACACCCAGCATGAACGGAGCCACCATTCTCGGCA
GCGAGCATGAGTGGCGAGTGGCGAGTGGCGAGTGCCAACATCTTGGATATATGCTTGACA
TTCTGTTAGAACTAGGAAAATAGTCTGTATCCATGCTGCTACACAACCCTGACTACATTC
CCTCAAGCTTTCTGCCGTAGGTTGGCATCATATAATCATCAATGATGTATTTTCGTCAGC
GCAAAAAAAATGATGTCTTTTCGTCTTGCTATTTAAATTTGAACAGCGTCATCTGTTTTA
CAAAATAATAATGGAAATAGTACCAAGTGCACGAGGATAAATCATCCTTGTGGTAATAAG
GCTGTTGCATCCCCCGTTAAGCTGTAGCCTGAAGGGAATTGTAGAACTCTTACCGACATC
AAGGTTGACCATATACATTGGTTGGTTGGTTGCTACTCTTTTCAGAGAATAGCAGATGAG
AGGACA
>comp116_c0_seq1 len=310 path=[405:0-211 118:212-309]
CAGACACTAATTCTGCACTGACACAGATTATTTAAAATCAAACATAACATTCTCTACCGA
GTGCTATCCCTCCTACTAGCAGTATCATCATTCCATTTCCAGGCAAAGCTAAGACATCAT
GGTGGGTAGGTAACTGTTCAAAACATTCTAGACATACTTCATGGCCCTACTCTTGTTGTC
TGTTATTATTGGTAATCTTCCACTGCTTCCAGAGTCACTAGGGAGTGACAGTAGACTCTC
TGTATACATAGACACTTTGCACCCATTCGGATCATCACAATATCCTCGATGCTCTAGCAG
CTCTCCTTTG
>comp117_c0_seq1 len=472 path=[499:0-471]
TTCAGCCATCCATAAACAGATCAAATGCCACTTTCTGATTTCATAGCCCTTAGGAAATAT
GGAACAATAGGCAAAGCAGCGCTTCAGATGTGAAGGCAGATGATTATAACTCAATCTTAA
AGCAGGAATTAAGCTGCCGTGATCATTTGGTAGATCCCATAGCTTATTATTCAATACACT
ATCCCATTCCTCAACATCTACTACAGAATGTAAGAGACTACCTAGTGTTTTTGCGGCTAA
TGGGAGACCGCAGCACTTTTTCACAATTTTTTCTCCTATTTCTTTCAAGGTTGGACATGC
ATCAGGGTTTCCAGATTTGAAAGCATGATTTACAAATAACTTCCAACAATCTTCATATTT
GAGATGTGGAAGAGGATAAGTTAAGGAGGCACGGATAGTTGATGCAACTGTAAGATGGCG
TGATGTCATAATTATTCTACTTCCACAGTCCCCAACACTGAAAGGTTTTTTG
>comp120_c0_seq1 len=376 path=[147:0-29 612:30-286 215:287-303 244:304-375]
TCGTTTCTGCCCAGGTAAATCATAAACCTTCCTTTCTTTCTTCAGTTCCTTCATCCACCA
ACCCAAACAGTCCACATTATGAAAAGGAAAACCCACACTTCGTTATGACAACGAAACAGA
TAAAAGGACGAGTCTTGTTAGGAAAGCTCCATATATATTATAATATAAACCTTTCAAAAC
CCAAAACCGCACATCCGTTATATAAACCAAGCTTTTTTTCTTTGCTCTCTTTTATTGTTT
GAGAAACGAAAATTAAGTCGTAGAAACCTTCAAATTGGAGCTCCTTGTGGTGAGGGGCTT
GTCATCGTCATTCTCTTCCTTCTTCACTTTTGCAAGCTCCGAAGGCATTTCTCAGAAAAT
TAAATGCAAAAGAGGG
>comp121_c0_seq1 len=602 path=[443:0-601]
TCTGTAGATGATGATACCCTGGACAGACACTCCGAAACCTCTGTACATGCCAATGAGACC
ATCGGACTTCATTGTCTTCTTCAGGCAGTCAGCCAGGCCACTGAACTGACGGTCAGTTGC
ACCCTTGCCGATATCAGCCGCCAGACGTGTTCGGGCGAAGTCAAGGGGGTAGACAATGCA
AAGGGATGAGGCACCGGCAGCACCACCAGAGGCCAAGTTACCAGCGAAGTAACGCCAGAA
CTGGGTGTTCTTGTCAACACCACCAAGGAAGATCTGCTTGTAGATATCCTTGAAGGCGAA
GTTAAGGGCCTGGGTGGGGAAGTATCTGATGACATTGGCGAGGTTACCACGCCAGAAGCT
GCCAAAGCCCTGCTCCTTGGGGATACGGACGAAGCAGTCGACAATACCTTTATACTGCTT
GTCGGCGGTAATCTGAGTGGAAGCTGCCTGAACCTGCAGGAGAAGCTTCACACGCTCGAT
CGGCGCGACGGCGGTTTTGGACACGGCGGCAGAAATGCCACCGGCCATAAAATCCTTGAA
AAATGACATTGCGTCGGTCTTAGCCATCTTGACCGATCTAGCGGACGAACGGGAAGAAAG
AG
>comp124_c0_seq1 len=330 path=[519:0-141 168:142-329]
CTGAGATGTGGGAGCATAATAAGACAAAGGGGCCTAGCCAAAAAAGTAGAACAGAAAAAG
CATAGGAAAAAAATGTGCATATCTTTTTAGCTTGACATTACTGTTCACTTTCATATTACA
CTTTTTCTTTTTTGTTGCCCCTGGGGGGGGGGGTGTTCATATAACCAATATGACAATCTC
AGCTTAAAATCTGATACATTTTTGTACATCATTTGTTTAAATTAGAATCAAGAAAGTGAA
CCATCACATACTGTCAATCAATATAAGAGCAGGAAATAAGGTTATGCAATGAAAGATAGC
TGCCCTTACCATCAGTTCGCAACCTTGGTC
>comp125_c0_seq1 len=346 path=[513:0-179 330:180-345]
ATATAGATTGGCAGGCACTGAGCAATGCAAAAAAGTGGCTACATTAAATAAAAATTTCAA
TTTATTTTGAAGCAAGCAAAGGACATTTTAACTGATTTTTATGGTACATGTTGATAAATT
GCTACTTGAGTGCATTTAAGTTGATGAATTAATATGTAGTATCTTGCTTTCACCTTGCAT
TTGAAGTTTAGGCGTTTCTTTTATGACATTAGTAAGCACTGCCCTTGGATTAATACATTT
GTCTTTAGAAAAAGATTCATTTCTAGTGTAAAGTTGGCTGCCAAATTTTGTTGTTGGTTC
GCTTCTTGGGTGCATAAAGTTGAAACGGGCTCTCCTACCTAAAGAG
>comp127_c0_seq1 len=490 path=[1:0-489]
ACTTTGAATGGGGCAGTAAGTAATTATGGTGGGAAACCCAATTCCCTTTCATTTTCTTCC
TTTTTTTCATTTTTACTTGATTTTCCTTCTTCTACTTCACTGTTTCTTCTTTTTGTAGCT
CTGCTGTCTGTTGTTCTTGGTATGTAGGGGCACTTTGTGACTTGTATTTTTTTATGCCTT
TTCCCTTTGTCCTATTTGTAATTTCTTCTTATGGGGTTTGTTTGTTTTCCAAGAAATTTG
GGAAAATGGGTAGTTGTCATGTGTATCTTCTGGTTGGACAGCTTGTGGTGAAAATCATAT
AAAATGGACAAAATAAAATAATGACTACTTCTCTATAGACAATGTTTTCCATTTTTTTAT
TTTTTTATTTCAGTTCTCTGTTGAGGGGAGATTCCACCTCCATTATTGTATGTTTCAATA
GACTTTGAGCCCAAGGACTCATTCATGCATTATGTCTTTGATGCACTTTAGTCTGATAGA
GCAATTTTCA
>comp127_c1_seq1 len=341 path=[1253:0-340]
ACTTACTGCCCCATTCAAAGTTGAAAATTTAGAGAGAGAGAGAAGTGTTGTTCATACCTG
AGAGTGAGTCCACAATACAGACACAGAGAGAGGAGTGATAAAAACAACCACAGTAAATAA
CCCATAAGAGACCTATTTACTGGACTTAATAAGTAAAAAGGCTCATGTTTAACTCTCTCA
AATTGTTTCATATTCATTTTCTGTTTGGTTAAAGAGCATATTTGATTTTTATACATTTTA
TATTAGAAAAAGAATAAAATAACTAATTATGTGAGCATTCTAAATATAAATGGTATGACA
AAGTTTGTTGCAATGAAAATAAATTAATAAATAACTATGTG
>comp129_c0_seq1 len=385 path=[363:0-384]
AAAATCATCAATAACTCTTCCTCCTACACTAAATGTGGACTCTGATGCCACTGTTGAGAT
AGGAATAGCTAGTACGTCAGTAGTCATCTTTGATAATATCTTATATTTTAAGAAGTTGTT
CCTCCACCACTCCAAGGAGCTAAAGGAGTTATTATTTTCACTCACTGGGGACTCTGATGC
CACTGTTGAGTTATTAATGCCCCTGCTTGAAGCCTCTAATAAGATGGGAGACCAACAAAG
ATACGAAACGATGAAGAGCGGCGCAGCGTGAGTGCGTGACTACGGCAAGTGGTAGTGTTA
GGAATAGATGGGTAGATTTAGGTTAGAAATATTTTTGTTAAAAAAATATAATATTTGTTA
TATAAATAATAATTATATAATATTT
>comp132_c0_seq1 len=344 path=[322:0-343]
GGTTCGATTTCAGGCCGCAACATCAAATTTTTTTATATATCTACAATTTTTTTGCCTGCT
TTTAGCAGGCTTTTCAGCTAGTTCAGTAATAATAAAGGAAGGTAGCCACTAGTAGCACAG
GCGCAGTGATAGCAAATTCTTACGTTTCAAGGCTGTCTGTAAACAAGCAACTACTATACA
CTTGAACATTTTCAGATATTTTATTGTTTCATGAACATTTGTTGTTACTTTGGCTCTCTG
GATGGAGAGAATAAATAAAATTCAAATTCATATTTTATATGGTCAGGCTGATCAATTTAA
AACCGCTGATTATCATTTTGAGCCGATTCTACTCTCATTTGCTA
>comp132_c1_seq1 len=314 path=[934:0-313]
GGAAATAAATTATCGACGTTCATTACATAAAGTTAGCAATAAATATGAAAATTTTGAACC
TCATGATGTCGTTATCTGATACATTTAGAAGTGTGCAAAACAACTTGTTCACCACAAATC
CTATCAATATTTCCCAAAAATTAGTCGATAAGAACGCGAAAAACGAAATATATTACTCAG
TTCGGTGCCCTCAACGTCAATATGCACTGTTCAAACTTATTATCAATAATCTATGTACAT
CTATATACATAAAACGCCAACCGTACGTACGTCACCCGAATGTGGGGGTCCCGGGTTCGA
TTTCAGGCCGCAAC
>comp135_c0_seq1 len=495 path=[485:0-494]
CGGTTCCTCAAAAGACAGGTGTGTGCCTATATATACTGGATATTTTTGCATTACCATTAA
ATTGATATCTAGGTGCAGTTTTCCTTATCATAGTGATGGTCCTTGTTTTGGCAGTTTATG
CTAATACCTGGTTGGATCCCAATCTTGTATAAAAAATGGGTGAATCTTATCTGAGTAGTA
TTGATATTGAGCCAAACTATAGATAGATCTTTGAGGTGAAGACATGTCAGATGTTGATAC
TAGACCAATGGGATGGGTTTAATCAATGTATGCTGGATGTATCATCTTATAAAGTATGAT
GTCAAAATCAATAAAACAAGATAATCATTTCTGGTTATATTGCTTGTACAAAGAAATTGA
TCAACAGGAAAACAGGATACGAGTGGGTGCCATAGGCATTTGGAAAGAGCATCCAAGTGG
AAGGAAAAAGTGAATTTGAAAAGTTCTTTTGGCCTTGACATTTTTTGTAATTCTAATAGT
CCATTCACATAAGGG
>comp135_c1_seq1 len=443 path=[1377:0-442]
CATTCACATAAGGGGTTAGTGCTGAAATATCGTGAAAGCTGTCATCATTGACTGATATGT
CGATTGGCATAAAGTGGAAGTATGAATAGCATTGAAGTGCGTTGGGAATAGACTTGGTTG
TCTGATCTAATTTGTAATATCATATTTGTGCGTTTTTGCATCAGGTAATCAACTGCAACT
GTAGTATCTTTTGTTAAGAGTTACTTGAGCCTTCTAATTTTCAGCATTTTTATATTTTCT
TTTCTTTATTAATTATTATTGAACTCAAAAGTTCTGCTGACTCCTTGATTATATGTCAAA
GCATTTTTTTGAGGAAATTTTTTTCTAGTAACTTGAGAAGTTGTAGTCAGAAGATAGAAT
GAAGATGTATAAATGACAAAGGCCCTTGCGCTAAGATCCTGTATTGGCCTCTTTTTCTCT
ACAGTTGCTTACAAAGGAGGAAG
>comp137_c0_seq1 len=517 path=[495:0-516]
GCAGTAAGGTCCAGATATCTAGAAGCACAAATAGAACCATGCAGCAAGAATATTTATCCA
TGCTTGTAAATGAATTGACACTTTGACAGACAAACCATCAAGTAAGAATCAGCCAATTCA
GTTATGAAGTCCCCAAAGTTTGAAGTTATCACTTATCAAAAACATTATTATTAATATTTT
GTCTTCAAAAGCTTATGCATTTTGATCTATCATAAATAGCTCATTTTCATTGGAAAAATT
TTCGTATCTGTTACAATAGTTTGAATAAAAAAGAGAAGAAAAAAAACATGATCCCAGTAT
TTCATATTTACCCCTTAACCCAATAACAATCATCATGCATCAAACAGTTATATCATCTAA
GAGACAGTTAATTGAGAACCCAGTCAGTTGACATCCCATATTCCCTACCTAGTATCTAGC
CACTAGGAATATATACACCAAGCCATAAACATAGGGGCAGAGAAAAAATTTGTGACAAAT
AGTGATTTCATACCTCCACCACCACTCATGGTCCTCA
>comp139_c0_seq1 len=396 path=[374:0-395]
AGCACCCTGGATAAAGCATCTGCTGCTCGATTCTCCACCCCTGCCTTGTATTGGATCTCA
AAATCTAATCCTAGCAGCTTCGCCACCCACTTTTTTTGTCCTTCTGCTAATAATCACTGC
TCCATGAGAAATCTTAAACTCTTTTTTATTAGTCTTGATGACAAAATGTCTGCCCATCAA
ATAATGTCACCATTTTTGTACAATGAAAACAATGGCCATCAATTCACATTCATAGATTGA
CTTGGTCCTTGATCTCTCCGATAAGGCTTGGCTAATGAAAGCCAAAGGTCTTCCATTCTG
CATCCGAACAGCACCGATACCAGAGTGGGGGCATTAGTTAGCCCAAACGGCATGACCAGG
AACTTGCAATGGCCTTCATGGGTTCTAAAGGCCGTT
>comp139_c1_seq1 len=371 path=[768:0-370]
GTACTTGTTTTGTTGGCATATCTCACAACTCGCCACAAACTTCTGAATATTCCTTTTCAT
CCCATTCCAGTATTGGATTGCAGCAAGCCTTTTGTAGGTTGTTGCTACTCCAGAATGCCC
TCCCCAAGGGGAAGAGTGGAATTCATTGAGCAATACTGGAATCTTGTCAGATTTTTGAGG
CAGCACCAGCCTTCCTTAATACCATAGGCAGCCCTTGGAGATTGTAAATCCAGGGTGCGA
ATCTGGATTTTGCAGCAGCTCTTGAAACACCTTTTTCATCTGATCATCTTGCAACACCTC
TTCAGACAAGTTATGCAGGTGTTGACTTGTTATTATTGAGATCTCATTATAATCCAGCAC
CTTGGATAAAG
>comp140_c0_seq1 len=762 path=[1109:0-761]
GGAAGAGGGAAAAACCACTGTCTGAAAATGCAGCCCCAGCAAAGGTGGGGAGTAACAAGC
TTCAATAATAAGTTTGAAAGAACTTTAGATATTATCACCATATTTACTTTGAGGAATTCA
CATAGTACCACACAACTATACTGCTTTAAAAAAGGCAGTAAGTTGAATCATTGACACAAC
CTTGTTGGCAGACTGAGATTAAATATGAACAACATTACTTTTGACAAGCTTCCTAAGAAC
CCTTAGACAGTCTATTAGGAACTATTAACAATTCTAATTGATTTCACTGATAACAGAATC
TACACTTTCAAATTGGAAAAAATTGTATCACAAGATTAAAAATATTGTGATTTTGGTGAC
CATCTTCACACTAAGACATCATCCTAGAAGGAGCAGTCTAAATCAACTTAAATCAATTTC
AAGTTTTGCACTCATCAGCTCATGTACAATGAAAGATAGAAATATTCACTTTGGACTTTT
GAGAAGGGAAAGGTGGGTGAAAACAAGCCACGTCCAGGCACTGATAGGGCTTGGCTTGAA
CTTAAATTTCTATATGCAGGCTTAAGCAAGAACACTATTTCACTTCAACTTGGATGGAAT
TTGAAGAGATTAAGTATCTCCAATTCCAAATATGCAATGGCATAGCATGAAGGAAAGAGT
AACATATGAAACTCTACACAGAACCTTGACAAGATCTTTTGAGAGCAGTAAAATAAGGTG
ACAAATATATTTGTAGATAGATCAGAAGGGAAATAACATCTT
>comp141_c0_seq1 len=410 path=[572:0-409]
GTCTGATACAAGAAGAGGAGCTCAGATTCAGTCTTATGAAGTTAATTGTGCAATTCATAA
ACCTTTATGGAAGATGCCAAGGGATAAAGATTTAAGGAGTTATTTGGTTGATTGCGTTGT
TGGGATCCTACATGAATATGTATTCGCTGATGTGTGGCATCTTCCAGTTGAGCGCAGATT
TGTTGACATGCAATTTAATGTTACAGCTGAAAATATTAGTCTATACCATTTCCAAGTTGC
TACGATGCTGCATGAGGATATTACGGATGATGTAAGACTCTTTAATCTGTGCTTTGGAAG
GGATTTTTCTTCAAGTGGATTTCTTCGTTCTTCTTTGTACTTGTTGCCGAAGAATCTAAG
TTCTTCAAAATTCCAAGTTAGCAATACTACAGTTTCTTATGTTTCAAGTA
>comp146_c0_seq1 len=344 path=[840:0-343]
CCACCAACTGCGCCAGCATCAAGTGAAGTGAAAAAGATTTGGATGGAGAATCGGATCAAG
AAACTATATATGAAACTATCTACTAGGAATGAGAATAAAAGGAGGGCGACCAGGGCTCCA
TTACGCGAGCTAGTCCTCTTGTGTTTTAGCCAGCTACGAAGTTTAAACACTATTATGTTG
TTCTATGTGATACTTAATTATGACGTTTTTGCTTGAAATAATTACGCAGTAAATCCAAGC
TACTTTGCTTAACCTGAAATTGTATCATCGGCCTTTCACTATGTTAAGGTCTAATGATCA
TGTTACAATTGTATCAAGTAATGGGCATGATAATATTGTATGGG
>comp148_c0_seq1 len=467 path=[1:0-466]
CGGGATAATTTTCCATCTAAACGAGTATTGTGTGTTGAAGGTGATTCAGCGTTCGGGTTT
TCTGCCATGGAAGTTGAAACGATGTTTAGGTACAAACTAGGGATCGTGATAGTAGTTGTC
AACAATAACGGAATCTATGGAGGATTCTCTGAAGAGGTTTGGAAAGACATTACAAGCGCT
GGACCCATTACTAAATTCTCTCCTCCATCCAGTTTAGTGCCTAATACGCACTACGAAGCC
CTGGCCAAACTTGGTAATGGTAAAGGATTCTTTTGTACAACAGTTGACCAGCTCCAAGAA
GCTATTTCCGAAGCATTCAAGGTGGAAGACGCTCCATCCATCATCAACGTGATGATAAAT
CCGTCATCTGACAGGAAGCCGCAATCATTCGCTTGGCTAACTGAATCCAAATTGTAGAGA
TGATGGTTTCACTCCTGGAATGATACTGAAATAACAATATAGTAGGG
>comp148_c1_seq1 len=571 path=[889:0-570]
GAATCCAGGGCCCACTCCCATTGTTCCAAACGTGCCTGCATCAAGTCTGTGGCGTGGAAG
ATTATTCTGCAGAATTCCCCGACCAATGTCCATGGTATTTGCTCCTTCACTCACGATAAT
GCACTGTTTAGGGATTACTTCTTGAATTTTTTTGAATACAGCATAGTAGTTGAGAGGTAC
CGACACATCATTGCCCATGTGTTGAACGTATTTATCATTCTGAGAGCACTTAGTTTGCAG
CTTTCGAATCCAAGGTGAACTTTGATCGTATTTCCAGTCTCCCAACTTTGCTTTTATAGC
GTCACAAGCTGGTCCAACGTTAGAGAGCACAGCGATTCCGCTATTCACGCTATTACCAAT
TTCTTCTGGGCAAATATCCACTTGTATAATGAAAACATTCTTGCTGAACCGAGGAGGACG
ACCGAAATGGAGCATCCAGTTCAGACGAGCACCAAGTAGTAAAATAACATCAGCTTCTTG
GAGTGCCAAAGTTCTGGCTTTGGCGACTGAACCGTGGTGGACGTCAGGCATGACTCCTTT
GCCCATTGGGGTGGGCAACCAAGGTAAGCCT
>comp149_c0_seq1 len=320 path=[303:0-319]
ATGTAACTCCTAGCTCGGCCAATAAAGAACTTAATTGATACTAGCCCTACCAATATGAAA
TACTAAATTACATGATCGTCAACAATCAACAGAAGTGTGAAAGAACAAAAACCAATTAAA
ATTTCAATAATTTAATAAGGCCGAGAAAAACATGTGTTGCACATTGTTGTGGTTAGGAAA
GTATCTGAACTGAAACACATAACATTCGGTGAAGTTCCGCTATCATTGCATCATTATGCA
AATCCAATAAAAATGTATAAAGCCAAGCTCAATTCAACACAAAACACAAATCCCACCTTC
AAAATCGTTTGGCTTCTGGT
>comp150_c0_seq1 len=317 path=[1:0-316]
GTGGCGTTGGGGAACAGGGATCATACTAGCTGAACGGACGTCCGCGAGAGGGAGCTGGTT
AGGAGAAACCGAAACCTCTGTAGTCGCATTGGAACGTCATGCTGAAGAGTCCCCCAGTAC
CAGGTCGCACGCGGCAGATGGTTCGAGCTCCGCAGCAGTCGAAATCATTCCTGCATACTT
TTCCCAGCTTACGGCAGTGATGCACCACATAGTTAGGATTTGCGGTGGGCGCTCCCATTT
CGGAGTAGTGGGCATGCGGCAGAGCCAGCGTCCCGACGATAACAGTAAGAATCAGGAATG
CGACGACTGGCCTCATG
>comp153_c0_seq1 len=359 path=[661:0-358]
GTTGTATTGTCAAATACAAACTAATAAAATCTGTCATATTCAGTTTTGCTGCTACATTCT
CTCCAATAAAAACTTAGGTGACTCTAGGCAATTTAAATTTTTTAATTTGAGCAGAAACAC
TACTATTCTATGACAACCCTATCACAACAAATACTGACCTTCAGTGTCTCAAATCTCAAT
TACTCTTATGTTATGCAACAATCAATATAGATGGAATCTACTTTTCAACAATTGATATAG
ATGACCTTGAGTACCTAATCATACATCTGCATGGAATATACTTTTTTCTGGCAGGATATG
AATACACAGATTGTGAAAAAATCAGGGGCCGGAACCTCAAAGCCAGAGCTCAGTTGTTT
>comp157_c0_seq1 len=346 path=[1:0-345]
GAAAGATCACAATAGAAAATTCATCATTTTCTAGCTTTCTTCCCTTGGTGCATTTGTGCA
AGGGAAGGATGAAGCAATGATAGAGAGAAGCAGCCACATTTCAGTCGGGAAGGAACAGTG
ATAGGGAGAAGCATGCATATTATTTTTCTTTTCCTTTTGTCTGGTTTTTACAAATTAGTT
TTCCTCTTTTTATGGCAAGAATGAACATATAAGGATGTTCAAACAAGACAATATAAGTAA
CAAATACAACTGGAAACCAAATTACAGAAACTAAAGGGAAACCAAGCAAGAACTCAATTA
TGTCAATGAAACTAATGCTTACTTATTTTTATCAATATTGGGAATG
>comp159_c0_seq1 len=555 path=[533:0-554]
GTCAAAGTGAAACTGCAAGATTCGAGAGTCAAAGCAGAATGGTTGTGAACTTGTGATTAA
TAAGTATAATGATAATACTTAAGAGGAAATAGTATAAGTTTCTTACAAGTCCTTTATTTT
TTTTCTAAAGTTTCCATTTACCAAGCACCAATGGGTGGAAAATACATCATTCCTTTCTCC
GCGTGTTACCTAAACTCACTTTTCATTGCTCTCATTAATCATTCCAGGCCACCAAGCATC
ACCAAGGGACAAGAACAGAGCTAATTGACAAGGGACCTCACTAAATGCAGCAATCTAATA
ATTTATGCAATCTCCAGACATGACAAAAGCATCCTTTGGCACCAGCAAATATTAATCAAG
TTCCATAACCATAAAACTACGGATTAGGACTGTTGTGACTTCTGATAATACAGACAGCAG
GAAAATCATCAATTCTGAGAAATCAGAAAAGTAAATGCAGAATGTCGAGTTGATGACCCA
ACAAAGACAATATCAATAAAAATCCAACTCAACAGCTAAGAACCTTCAAGAATTGCATCA
TGTAATGCACTGGAA
>comp160_c0_seq1 len=390 path=[1:0-389]
ACTGGCTTCAAGTTGAACTCATCTACATCATTCAAAAAAAGTTACAATGAAGCTAAAATG
TTACCCAATGGCTTACATGAGAGTTTGTGATGATAAAGTCTATACAAGTATGAAGTATCA
TTAATACATTAGAAATCCTCTTATGTATTCAAACGTCGAAGATGGGCTCCATAGGGCACC
ATTCCCTAGAGATGAAATTTAGCAGTATTAAAAATTCTTTCTATAGTTCCATTCGGTAGG
ATGAAATTTTTGGAAATTTAAATTTACTTGCACTGTGTAGAACATATAGCCCACATTAAG
CTGCAAACAAGAAACTGTTGGGCAATGCTAACCATTAAATGTAAGGCAAGCCTAAGGTAA
AATTCAGCAGCATATTGCTTAAAAAAAAAA
>comp161_c0_seq1 len=318 path=[1:0-299 301:300-317]
ATGACATACAAGTGGCTGTTAACATGCTGTACGCCAATGAAGAGGCTTTGGGTGAAACCA
TTCCAAAACCTCAACGGAGTGCAACAGATAGAAGAAGAGCTCTCGGTACTGCTAAACAAG
AAAGTCCAGCGCCTGTCGTTCGAATCGTGTCAACTCCGGACAAGAGCAACGTCGTCAAAG
GATTCAACATCGAAGGGGGCGAATCTTCAAAACTCATTCCTCCAGCGGATGACAAGAAAG
AAAAAAGTCCTACGCCTGTTGGGAGCCAAACCCCTGTTGGAAGTCGGACTCCAGTAGGCT
GTAGAACTCCAGTTGGCA
>comp162_c0_seq1 len=627 path=[605:0-626]
AAAAGTGGTTTGTGCTCTTCTTTGCTTGTCTCCTAATAATTGCTGCCACTCCCAACCCAA
ATGCTGTGGAAGCCAGGCAGGTTCTAACCCTCCACATAAAAGATATTAAAGAAGCATGAA
TGGAATTCAAAAATCACAAGGAATATGACCAAATAGAAAATAGAAGCTTATCTTGCCACT
GTCAGGCAGTCATTCCCACCGCTAGACGCTTGTGATGAAAAAAAAATGACATGCTCTCTG
ACTTGCCTCCGCCGAGCGGTCATTCCCACCACTGGGCTGTGGGAGAACAGAGAGGATTTC
ATTAATTTTTGCTTCCAGGTCGCCGAGCAGTGGGATTGGTCATTGGGCGATGGCTTCTAC
GACGTAGCACCTATTTAAAGTCGTGTTTCTTATTTTTTTAGGTGTCTTTGGTCATACTCA
AGGCCGAAAAATACATCTAGGGAGCCTTAATTCTTCATCTCTTGGAGCTTGAGGAGGAGG
AGGAGAATGGATTCTTCACCAACCATCTTCATTTCATGGAGTTCTTCCTATCCCTTTCTC
CATCTTCTTTTTTTTCTTTGTTTTTGAGGTTTAGCATGTTTAGCTAAACCCATTTTGCTA
GGGTTTTGATATAATCCATGACTCGAT
>comp163_c0_seq1 len=543 path=[1:0-542]
GAATTTCATGTGAACATAACTTGGAATACAAAAGCAGGCCGCTCACCTATTTATTATTCC
TCTTTCAAATTACCTCTAGATAGAGGCTTTGAGATGCAGAGAAGAGGGAGAAACGACGGT
AAAGGTGTCCTCGTTTCCTCCAATTTCAGCGCTACTCTAGATTCTCCAAACACCAGAACT
GCAGAATTAATTTAAATGAAGCAACAATGGTTCCTAAAGCTATTGCAACAACTTCGAAAA
TCAGTCCATCGATTCTATCACAAGTAATTTTGATTTTTCAAAATGAAAATATCATAAACA
ACCAAACGGGAGCCTCGCTAGAACTTGGATCGCTTGTATTGCAAAGCAATCAGTACCGCT
TAATTCTCTCAACAATAATTGTTCGTTAGGAACTGAATAATAACTGAAACGTTTCACTGA
GTTAGTTTTTCAAAAACTGGTTGAAAATCGTGAAACTCATCAAGAGAAATTAACGGTAGT
CAAGTACATCTGAAAGTAAATTATACAATTATAATTTATATAAACCAAATAAGAATAAAG
CAG
>comp164_c0_seq1 len=323 path=[1:0-131 133:132-155 663:156-322]
GGCTTGCTTTCCTCCCTTCAAAAGTAAGACTTTAGAAAAACAAGGTTTATCATTTTATGT
ATTAGTTTGGTAATTTTAGGTTAATAGTAATCTTCAGATTGAACCCCTGGTTTGATGCCT
TTGCTTTAAAACTTATTTCTCTCTCTCTCTCTCATTTTTTTATCCATTTGACCTCCTTAA
AGGTAAGCTGCCTTCAGTTATATCACAATTTACAAACATTTACCATGTCTGCCATTCATA
CTTGAGGTTGTAATAGGAAAATGCTTGAGCTAACACAAAATCTTTGGAAAAAGGAATTCA
AAGATTTTTCCTCAAGATTTGAG
>comp165_c0_seq2 len=306 path=[292:0-68 361:69-305]
GATTTAAGGAGCCAAATCAGGTATTAATCCATTGTAAGAACTGTAATTTCCTGAACACAT
CATTACTTTGTTTTCTAGAGCATGCTAATAGTAATTAGAAATGATGGATGGACAACATTT
GCTACATAAGATATTCCAACCGAGCTTTAATTTGAGTTACATTGACCTTCTTTTGCAGTT
ATTGCTATTTGCCAAAGTTTCTGTGAAATAACTTTCTTTCTAGTAGGTTTGCCTGACTCT
GTTTTACAATCTTTATGTGCATATTTTAATACAATTTGCAATAGATTCCTGATGTGTGGG
AGGATG
>comp168_c0_seq1 len=383 path=[361:0-382]
ATGAAGAATTGATATGCAAACCCTATCTTACATTCAATAACATATGTAAATACTTTACAC
AAAAACTGACATATAAGGCTTCAAAATTAGGGGGGAAGTTTGGATTTTGTTGAAACAAAT
AGTTTTGGGAGAAATTATGTGTTTAGTCTATAGACAGTGCATCTTATTTATACTATGAGT
GCATTGAGTACAAGGGCTAATCAACTTGACAGGGTTCATCAATTTTGGACAAATTAAATA
GAAAACCATGGTCACAAAGGTATCTTCAAGGCTTGATATATCTGTTGTTTCTTATCGATT
TTAGGCATATTATATATGCTTGTAAACTTTTTTTTACGTACAAAAAATTGAAGTAAATAG
CATAGTCATAAACTCACAAATAG
>comp168_c1_seq1 len=517 path=[1215:0-516]
GTATTTACATCAATTAATTGTATGTAAGGTAAGGTTTACAAACATATGTAATATGCATAA
AATTGATAAGTAACAAGAGATATCCAGTCTCAAAGTTACCATTGTGACCATGGTTTTCTA
TAAAAGTTGTCCAAAATTGATGAGTCCCAAACTTTTGCCCCAGTTTTGAAGCCCTATATG
TGAGTTTTTGTGTAAATTATTTACATATGTTGCATGTAAGATAAGGTTTGCATACATATA
TAATATGCTTGAAACTGATAAGTAGTGTGAGAGATATCATGCGGCAAAGTTGGCTTCATG
ATCACGAGGCATAATATGCACAGAAAAAACCATAGAGAGGTTATGTGCTAACAGAGGAAA
GCTGAAGAGGTAAGGTGTCACTTTTTAAACCATAGGGTGGCAAAGTGAAATTGGGCCAAA
CCACAAGGGGCAAACTGTAATTTACCCTAAAATTAATGGGTTATTCATTCCTAGTCCGCA
TATAGGAATAATTAAGTAATAGATAACTGCTAACTTG
>comp171_c0_seq1 len=333 path=[1:0-332]
ACCCATCAAGAAAAAGATACCCATTAGAAAGCAATTCATACTTGACAATCAAACCTCCAC
GTCATTCGCATAGCAACAGCCGATACCATATTACAACTGATATGCATACATCAAAATCAA
TTGAATTAACTTTTTCTTTTGAGAATTAGGAACAGACTAGTCTCCTACGAACGAAGGAAA
TCAACAAGAAGCATCCATGAAATAGGAGGGAAGAGAAGTGACCTAATGCGATTTAGACCC
AAAACACAATGGAAAAACGGGAAATTGAAGGAAAGGGGTATTTTCGCAAAAAACAGATAA
GATAGATACCCTGAAATTCCCTGCAAATTAGGA
>comp173_c0_seq1 len=496 path=[474:0-495]
GTACTCTCCAAAATAAGGTCACAGAGCTTGAGAAAAATCTGAAAGAACAACTGCAATCAG
AGACAGAAAATTTTCAACAGAAGGTATGGGATCTAGAAAAGAAGCTGAAAATCAGTTGCA
GGAGTCTTGAGTCCCAATCTGCCAATCTAAAAGATAAGGTTAAGGAGCTTGAGAGAAAAC
TGAAAGGGCAGGAACAGAGCTCAGAGTCCTTGATTCATCAAAAGGTGAAGGAAGTTGAGG
ACAGATTCAGAGAGCGAGAGCAGCAGTGGCAACAAACTCATTTTGTTGATGCGGTGAAAG
CCACATCTGACTTAGGTAAAAGCTGCAGCAGTGACGACTACCCAAGCGAGATTGAGCCTC
GCATTTTGAAGTGTTCAAACTCAGTAAACCGCCAGATGAATCAAGGTTAAACTTTGTTTA
GAGGGAATGATTCTATTCATCAGATAATAAGTAAAAGAGCATCAGAAAACAGTTTTGTCA
TGTCATCCTCTTTACA
>comp178_c0_seq1 len=434 path=[1:0-433]
GCAAGGGTTGCCACAACTCCCACATCATCCTTTGCAAATTTCAAATTTGATTTCTGGGTC
AAAGAATTGGTTTTAAACCGACAAAATATGCCAGCAGCAGAATTCTCCTTCTTCAATATA
TGTTCTATGGTTTCCTCTTCAGTATGAAAGGAACCATTTCCATTTTCTGTCGTTACATTA
GCTGAATGATACCTTCCGAGACTCACTAAAAACTACATCAGCGTAAAAATGTTGGAGAGT
AACTCATATAGCAAATGCTTAAGTAATTTACTCAACTATAATGATGTTGTGCCTGGTTAA
TCTTAAATTCTTAATGACTCCCCTCACATCACCCCTGGGGGGAAAACAAACAAAAAAAGA
GAGGATAGATTTCTGAACATACCCTGTAAGTCAAGTATAGATTCAGCAGCGATTTGATTG
AGAATTAAGGAATT
>comp179_c0_seq1 len=787 path=[1:0-511 1360:512-786]
GGCTTGATTCTCAAACCCATCGATTAAAAAATTGCGCAAGAAAATTGCAGTCGAAAGTGG
AGTGGAATTAGAACGAAATTTATGCTCGCAACTACTTGCAGGCTAACCACCCAATTCAAA
TGCCTTATTCTTTCTATAGAAGACCTACACAGGAGCATGCATGTATCTCCTGTACGTGTT
TGCATGTTTTAAGCAGTCACATTAGACATTCAAAATTGCTTATTAGAATTCAACCACCAT
GTCCAGTGTCCATTTTCACATCTGTTTGTACAGAACTGCGCATATACATGTGAGCATATG
CATTGGGCATGTGTGTGCGTGTATATGATAGTTTATGTACATATGTATGCATGTGAGCTC
AGAAGTCAGATAGACTTTTATGATGAAGCTACCCAATTCCTTCATTGCAATGGTACATGT
AACAGTGATAGTATGATATGGCTATATTATCTTACCCTTTCCCATTTGTAAACGAAAAAA
TATTCAGTGACATGTAATGGCTGCAGCAACAACATATAACCAGATACAATTGTATTAGTG
TTTCCGTTACCAAGTCAGTGCACAATATACAGCCATTGGATCATACTAGTCTGATCAGAC
TGACTAGTCAACTCAATCAATACAATGGAAATTGATTGAGATTTCCCCACATTTTTTATT
TGTTGCTTCGTAGAATGAGAAACTGAGAAAAAAAGGATAACCTTCCCTTCGTGAAGGTGA
TTCCACTTTACTACCCATTCTATTCATATTAAGCAAAACGAAATCCTGAGAATTTCACAA
CTTGTAC
>comp180_c0_seq1 len=2012 path=[1:0-2011]
TAAAACACCACCACCCAGAAAGGTAGTTTAGTAAAAAAACTAAAAATTACAGCAGAAAAG
ATGAATTATTGTACTACTGTATATATATTAAGTAGAGAAATAAAGAGGACAGAATAAGAG
AAAATAAAATTTAACACAAAATCACCCCCAACAGAGTCTGAGCTGAGTCAAATGGAAAGC
TTGTCTATGTCAAATTAACCAAGACGTTGCGGCATGTCAAACTGTCTCAAATGGAGCATT
ACCTTTTAGTCTTGGACTTGGAATCTCCTCTTCATTCTTGCAGTATAGACAACTCGTTGC
ACATATATCCAATCATTCATGTTGTTGAAGAACTGAAAATAAGCATATCTCCATGAACTT
TTAAGAATTAAAGTTCCACAAACTCCCCAAAATCCAATAATGAATCCAAACCCCAAGCTG
ACGTAAAACCCAAAGGTTATGAGTTCATCTTCATCTCCTTCAGTGCCATTTCTATGAGTG
CTTCCAGTAAGTTGAGGATTTGGGGAATTCTTATCTCCAGGGCATTGATTTGTGAGTGGT
GGGCCACAAAGCCCATGGTTCCCTATATATGTAGAGGTATCAAAGGATTGTAGCTGAGTG
CTAAGCGGAATTTTCCCTGATAAGTTGTTGAACGACAAGTTCATGTAACTGAGAAAACTC
AAATTCGATAAGCTTGCTGGAATTTTACCATAAAGATAGTTTCTTGACAAGTCAAATGAT
TCCAACATTTTCATATGACCAATGTTGTTGGGAATGAATCCTGTGAGATTATTTCCTGAG
AGATTTAAGGAAGCCAATGCCACAAGTCTTGTTATACTATGTGGTATATCTCCTGTTAAG
TGATTGGAAGAAAGATCAATGGTTGTCATAAGTCCAAGATTTTTCCCATACTCCATGTGT
TCTCCTTTCCATACCAATATCGCATTGTCAGTGAACCAGCTAAGCATTGGTTCTTGACCG
TAACCAATTCCAGCTGATTTATAAACAATGGTTTCCTTTGAAAACGTTATATTTGACAAA
GCAATTATGTGATGGAGGCAATGTGGTATTTTCCCTGTAATACTGTTTTGAGAGAGGTCC
AATACTTGAAGATATGATAGATTACATAGACTTGCAGGTATGCTTCCTTGGAACTTATTT
GTCTGCAGACGCAAAACAATCAAACTTGGCAGGTTATGGCCTATCCTTGCTGGTAACGTT
CCTTGCAAATTGTTGTCCCCAAAATCAATGAGCTTCAAGTTGGTACAAAGAATCAAAGAT
GGAATTTCACCAGAGAGATTGTTGTTATTTAAATGGATCGTCTCAAGTTGTTGTAAAGTG
CCAATTGACTTGGGTATTCTCCCTGAAAAATTATTTTTTGCCAAATTCAGAAGTACTAAC
TTTGGTAACTGCCCCCAACATTCAGGAAGTCTCCCTGATAGTAAGTTACTAGACAGGTCC
AGATAAGCTAACATGGGCTGTAATGTTGCACAAGAAGAAGATGCGGGCCCTGAAAACTTA
TTATTTGAGAGACGCAAGAGATATGAGTTAGGTGGAAAATGTGGTAGCGGACCAGAGAAA
TTGTTGAAACTCAAATCCACGAAGGGGTAATCCATCTTCATTTTTATAAATGATTTTGGC
CAGGCCCCAACAATTTGGTTATGTGAAAGATTCAAGTACATCAAACTTGAAGTTACGTCC
CCAAACCATTCAGGAATTGTATCTGAAATCCCACCCTCGGCAATGTGCAGTACCTCAAGT
TCCCTTTGATATTTGAGCCACGCTGGAAAATTGGGACCCAAAATGCACCTTGATGTAAAC
AATCCACGCAGTTGGAAAGGTGGAACCCTGCTTGAGCTTAAGTTGAAAGAAAGCAAATTC
TGGGACACGTCCAAAATTTTCAAATTGGATACATTTGATAGATGTGCTTCACTAATTACA
CCACTCAGCATATTTGAAGAGAGATCCAATTCAATGAGACTAGAAAGTTGTCCAATAGTA
TATGGAAGTGTCCCATTCAACTGATTGTGGGA
>comp180_c1_seq1 len=816 path=[4772:0-815]
GAAAATTGCAGATGCTGAACTTGTTAGTACCATTCCTCATGCTCTGGCGAACCTTTCCAA
TTTGCAAACTCTTGACCTTGGGTTGAATTATTTGGTTGCAAATGACCTTGAGTGGGTTTC
TCACCTTTCTAATTTGAGATACCTTGATCTTTCAAATATTAATCTTGGTGGAGCTATTGA
TTGGCTATCATCAATAAGCAAAGTCCCTTCTCTATTAGAGCTTAAGTTAGATGCCTGTGG
ACTCCCTCAAGTCAATACTAAATCTATTCCCCACATGAATTCTTCCACTTCTCTCAAATT
CCTCAGTCTTCTAGGAAATAACTTAAACTCTTCAACTCTATCATGGGTACTTAATGTTAG
CGAAGTCCTCACACATCTTGATCTCTCATCCAATTCTTTGCAACAAAGTATTCCAGATGG
TTTTGCAAATATGATTTCTCTTCAATATCTAGATCTTTCGTTTAATGAACTTGAGGGTAG
CGTACCAAAATCCTTCCAGAGGTTGTGTCAACTGAAAGAGTTAAGGCTGTCCTCCAACAA
ATTGTCTGGCCAGCTCAGTGACTGGATACAACAATTGTGTTCTGCACAAAATAGTATAGA
GATGTTGGATCTTAGTCATAACCCATTAAGTGTTGGGCCATTTCCTGATTTTTCAAGGCT
TTCATCCTTTAAGACATTATTACTTCGAAATACCAGTATTGTTGGGCCATTTCCACAATC
ATTTGGGCACATGCCTTACCTTGTAAAACTGGATCTCAGCTATAACCATTTGAGTGGGTC
ACTGCCATTGTTTGAGGTTGCTGAATTTTTGTTATT
>comp181_c0_seq1 len=379 path=[1:0-299 301:300-378]
TTTTTGAAATGTTGCAGCGGTAATTGGTTGCCTAGAAGTGTGCTGTGGTTTCTTTGATGG
AGTTTTTCTGCACATGGAAAATAGTTTTAATTTTTGTGGGTGAGGAATGTAGCTTAGTGA
ATTTCAAAATCCTTCAGAAATCTGTTTGACTTGATCAAACCAAAGAACTACAGCCTACAA
GATGTCAAAGATACCATTTTGTGGCATGGTATGTGGGTGATGGAGTTGAATTCAACTTAA
TTCCAGCTTATCTTTCCTTCTTAGCTTTCAATATTTTGTAAAAGGTCTAGCAGAGTTGGC
AACTCTGCCTATGTCGTACATTTTTGTTAAACTTTACATAGCCAGTCCTAAGCCCTGATA
AAAGAGGAGGGTTGTGTTA
>comp186_c0_seq1 len=503 path=[481:0-502]
GGTTATCCTGAATTTGAGTTGCCTAATTTTAAATATTTGTAGTAAAAGGAACCAATTCAG
TCTTGGATTATAATATAGCTTGAAAAAAGACAAAAGCAGTGAAGGAGACACTTAAAAAGA
TGGGATTGAATGATAAGTTCTTCCCTGTTCTCACCCCCTTTCTGTGTGAAATGCTGCAGC
ACACACCACTCATATTTCTTTAGGAGAGGACAAACTGGGAACCTTGAAAAGTATTCAAGT
AATGTAGTTATATTTTTCATAGGCAAGGGGACAATTCAACTGGCTCTTTGTTTACTTATA
CGCTATTGGAATTATGAATCAAAAATTCTGACACAAAAGTGATGTGACAGTCTCTGCAGA
AACCCTATGTACAGTATATGAATATGAGAATCTTCTCCAGGTGTTCAATTCATGTTGTTG
AGACAGTGTATGAACAATCCTTCCAAAGACTCAATTAATTTTGATTTTTGATATATGCAG
GGAAAGATGTTGCAACATCGAAT
>comp187_c0_seq1 len=390 path=[882:0-389]
AGGAACGTAGCGCCATAATGCAGGTTAGCAATTTAATATTGGAAAACCACATTCATCAAG
GCCTCTCTAATCACTGGTGATTTAAAGATGTATTTACTATTTACCCACACTATGAATTTT
ATGTGGGCTTCTCTAGAAATTACATTTGATCAAATATATAGAAATCCTCAAGGGCTATTT
GTGAGTGGAGAGTAGTGGACTACACAGAATCCTTTGCATTAGTTGAAGCAATCCTGGCAA
ATGTGTCTTCCTAAAGACTAAATACCCTTTTTTTCTTTTTCTTCTTTGGATAGAATCCTG
AAAACCTTTGAACTCATTAGATTATTAGAATATGTGTATCATCTGTAATCCCCTTTTGCA
TTTGACTATGAGCAGGTTGCTTTTGTTTAT
>comp189_c0_seq1 len=408 path=[287:0-407]
CAGGAGGCAAATCCGGGTGTATACACAATCATCACGTTTCCATTCCTTTTTGCTGTAATG
TTTGGGGATTGGGGGCATGGCTTATGCTTATTGCTGGCGGCTTTGTATTTCATAATCAGA
GAGAAAAAGTTTTCTAGTCAGAAACTTGGAGACATAATAGAAATGGCTTTTGGTGGACGC
TATGTCATTATGATGATGGCACTCTTCTCAATCTACACAGGGTTGATATACAATGAATTC
TTCTCTGTTCCATTTGAACTATTTGGACCATCTGCCTATGGATGCCGTGATCCTTCATGC
AGGGATGCTTCTACAACAGGTTTAATAAAAGTGTATGGCACTTATCCATTTGGTGTGGAT
CCTAAATGGCATGGTACTCGGAGTGAACTGTCATTTCTTAACTCTTTG
>comp190_c0_seq1 len=340 path=[318:0-339]
ACTGTACAGGCTTGACAATTCAGTCGTGACGGGTTTGCTTATTAAGAATACACCTCAAAA
GATGGTGCAGATCAACTTCTGCGAGCATTTGCAGATCAGCGACATGAATTTGGACAATGC
TGCAGGTAAAGGCAAAGCGTTCAATACCGACGGATTCTGTGCGGGCGTCAACAAAGACAT
CAAAATCACCAACGTCGAAGTGAATAATCAAGATGATTGTTTATGCGTATTGGCAACCGA
TCAAATTTGGTTCGAAAACAGCGTATGCACTGGAGGAAACGGCATTTCTATCGGATCCAT
GGGTGGTGGTTACACGGTGAAAGGCCTTACAGTGAGGAAA
>comp191_c0_seq1 len=336 path=[1:0-335]
TGTGACCTAATTTGGCCCATTTGAACCAATAAATATTTTCAAAGCAAGTTGATCCAACAT
CTTTACCAAAAGAATGCACACATTTTATTTATTTATTTCTCAAAACAGAATCGAGCAACA
CCCCCAAGTCCCCCAACATCTTTACCAAAAGGTTTTCAAAATGAAGTAGGAGCATATTGC
TTAGAGGAAACCTCAAGAAAATGACCAAACATGAAATAAAAATAACTAAGGCCTCGTTCG
CACAACAATTTTCAACAGGTAGGAATAGGATTGACAAAAAATGCAAGGGAACCTCATAAC
AAAAGACCTGGAACATTCACTTAGTACGTACGTTAA
>comp193_c0_seq1 len=642 path=[620:0-641]
TGGAGGAGTTTGATATGACTGATCTTGGCAAGATGAAGTATTTCCTAGGCATAGAAGTAA
CTCAAAATGCAGAGGGGATTTTCATCTGTCAAAAGAAATATGCCAGAGAGGTGCTGGAAC
GATTTGGCATGGAGAAAAGTAACTCTGTGACAAATCCTATTGTACCAGGATGCAAACTTT
CATTGGATGAAGATGGGAAAACAGTAGATGCATCACTCTACAAGCAAATGGTAGGAAGTT
TGATGTACCTCACTGCAACCAGACCAGACTTGATGTTTGCAGTATGCTTGGTCAGTAGAT
ATATGGAGAGACCTACAGAAATGCATCTAGTTGCAGTGAAGAGGATCTTTAGGTATTTGA
GAGGTACAACTGAATTTGGGATCATGTACAGAAGAGGAAAGGAAGGTACTCTGGTAGCTT
ACTCGGATAGTGACTATGCAGGAGATATAAATGATAGGAAAAGTACCTCAGGGTATGTCT
TTGTGCTTGGATCAGGTGCAGTGTCCTGGTCTTCCAAGAAGCAACCAGTGGTGACTTTGT
CAACCACTGAAGCTGAGTTTATAGCAGCAGCTGCATGTGCTTGTCAAAGTGTTTGGTTAA
GAAGAATTCTAGAACAGATTGGCCATCCTCAACAAAAGCCTA
>comp195_c0_seq1 len=360 path=[1:0-285 575:286-359]
GCTCAGTTGTACTTCTCATTTCTCTTTAATGAAATTTCTTCTATATAAAAAAAAATTGAC
AGAATATTTCTTGAAAGTGTAGCCCAGAATATCCAGGATCTGGATGCTTCAGCAGGATTC
CAAGATGAATAGTGTATTGGATTTTTTCAATATTAGTATTTTTTTTAATGCATGTTTAGC
CTCTCATTTTGGGGGGAAGTTGGAGTAGCATCTATTAAGATGACAGAAGCTTGCCTAAGG
TGGATCTAGTGAGGAGAAGACCAATAGCGGCTCTAGTGAGATAAATGGATCAAATGGAAG
ATAGTCCGGTTAAAAGGGGTAGTGGAAGTCCAAAGCAAACTTTAGGAGAAACCATTAAAA
>comp197_c0_seq1 len=303 path=[663:0-302]
GTGTTTTGAATTTAGTCCTTTGAGGTTGTTCCAACAATGCATTCTGTTAAAGATGTCAGT
ATGGTTCACAATTGCAACTCTTTTGGTTGATTCATATCTGGATATTCTAATGAATATTGC
GGACTGTTATTTATATCTTGCATTGCTAATGTACTAGAAGAGCACAAAAGTCCTTTCACC
TCATGAGAGTTTGTAGCTTAGTTGCCAATCAAATTTATATCCAATTGTAATTTCATGGAA
CTGGAATAATAAGGTGTGAAAGTAATTTGCGGAGATGGAAATGTTGCGGTGGATGAGTGG
ACA
>comp198_c0_seq1 len=477 path=[1173:0-476]
CGAGCTTATAAAGGATGCCGTACATGTGGTATATTTTCATATTCATCACTTGTTTTCATC
CTTGTATTGTCCTCACATTTGATTGCTGTAATTGGTCTTTGTTGCTCATGGTTCTATTTT
CACCTAATCTCTGCTGTTTTCCTCTCTGCCTGTCAACCATCTCCACCTTCTCACATCATC
TAAATAGTTAAAAGCAACCTAAAATTGGTTGCATATGCTTACTTAAATTTTTTTTGAATA
TGCTTTTCCAAATGGTCTACACAATTTATTCTGGAAGGAAGGACAAATCAAGCTTGTCTT
AAGTGTGTGTGACTGTGTATATCAAGCCACCTGTATTACTTGAAGCAGGGTGTGCTCTTG
TACTCAATATTTATACTGTTTCCTTGCCTTTTCTTAATCATAATATTTTATACAGAGTGG
ACCAGCTTGATTACTTTGTCTTTGCTATTTTGACAGCCCTGTTGGAGAAAATAAGAG
>comp198_c1_seq1 len=382 path=[360:0-381]
TGGCGTTGTAGAGATCCAGTTCAGGTGAACATGCTGGCCTGTCATTATTTGTCGTACTGA
AATGATACAGAGACAGGCTTATTACTGTCCCCGTTTTGTCCTTCTGTCTGATATGCTGAA
TCAACAGATTTTTTGTTGCAATTGGTGCTGCTCATTTGTTCATTCTGAAATCAATTCAGA
ATGGCAGATTGGCAGCATATATGAACTTTTCTTGGGGAGAGGGGGGAGGAAAAGAAGTCT
TGCTAATTGAAAAGGGTAATTGGCAACAGGAAACTAATTTGTTTATGTAGTCTTCAACAA
CTGCCTTGGTTGTGAATTATTACTTGGAGACTGATGACCCTTAGGTTTGGTTTCTGTGGC
TCGAGCTTATAAAGGATGCCGG
>comp199_c0_seq1 len=515 path=[1:0-514]
ACAAGATCTAATCATTTATCTCATCTCTTAGAGGAGTGCCTCAAAAGAGACAACTCTATC
GCTTGTGGCTGGGCAGCGGCATCTATAGAATGGATAGAGAAGAAACTGACTTGATGCAGA
ATACCCCATCACCTGGAAGCGAAGCTGACAGTAACAGATTTGGTGAACACAATGTGGGAT
CAGATCTAGACCTGACATTAAAGAGTACTTTTTATGCAGGACATGCATCCAATCAAGTCT
TTCCATTTTGTGTGGTCAAAATTTGGCCAAAAGATACAGATTCCAGTTGCACAATTCAAG
AGGCAGTAAGTTTGTTTGAGGAAAAGGATCAACAACATTTTCAGATATCCGAAAAGATCA
GAGAAAAAGTGTTTGATCGCGAAATGGCGCTTTCAAGGTTGAAAGATCTGAAGAACTATA
ACCTTTACAGGCTAAATGGGAGTGTTGATGGGAAAATGGACATATTGACTCATTTGTATC
TGGCACTAGACAAGTTGTCTTTTGCAAATAAAGAA
>comp200_c0_seq1 len=502 path=[429:0-501]
ATGACAAAGTAAATTCAAATTCAAGTAGGGAGAATGAAAAGTGTAAAAAAGAAACCGTTG
GCAAAGAAAAAGAGAGACAGATCACAACCAGAATCAGTAACTTTCAGACCAAGATAGTTA
AAACTAAAAGCCCTTGATAAAATATACAATGACAACAACCGTAGTTTGGAAAGAAGACGG
ACAAAGAAGGAGACAACCTCTTCTCTAACAACTAAATAAGATACCAAAAGCTGATAATCT
TATAAAAGAATACCTGTCTGAAATAGTATATATCAGCATACATATAGTGCTTTAAGAAAA
TAAGATGCATATAACATACTTCTTTGCAACAATTTTGCAACTATACCAGACAAGAAATTA
AACTAAACATCAGATTCCATCATTTCGTCTGAATCTTCACCAAAAGTGAACCCGACCCAA
TCCTTAAAAACATCAAAAGTAGTAAAATTTTCAACAAGCGTGAATAAAACGATAAGGAAA
CTTTTAGAAGGGGGGGGGGGGG
>comp202_c0_seq1 len=445 path=[684:0-176 262:177-444]
CAGAGTCCTTTTTTGTATTTGTCTTTTTTTTCAGGTCCAGGCATCAGGGATGTGGACATT
GGAGCCACGGATATCAAAGCTATTTTGGGACATATCATTAACGCTGTCTATGGGAATTGA
ACAAAAGCCCTCAAATCCCTAAAAGGAAGCATGATTCCTATGATCTTGAGGGAGAGTTTT
TCAGATCTGTTCTCTCCCCTTCAACACTCGATCCATAGCCAGACTAGTTCTGAAAAAGCT
CCAACCCACTATTGTCAGGCTAGATCTCTCCATTTCAGCCTTCTTTTAGAAAACAAGAGC
CCAGATCCATTCATAGCAAGGCGTTGCCAATAAGTTCCATGGCCACCAGCCTCTTTGTGT
GCTCTATGTAAAACCACAATTGCTGTTGTGAGCTATGGCCGTAGTTGTATGACGCAAACG
AGTAGTGGCCGGGTCACTAATTTAG
>comp204_c0_seq1 len=719 path=[1:0-718]
ATAATATATGCACTTAAATCAATAAACAATAATGTTAGTTATAGTTTCAAGCGTTAAAGG
CTAATAAAGTACTTAGGAGACAATTTCCAATAAATACACCAATACATATTCATTTTATGG
GTAAAGCCTAAAACACTAAAACTAGCTTGGTTTGTGTTTGCACTCTACACGAAGACCGTG
AAAAATCAATGACAACTCAGCTATCATAATCGCAAGCGGTTGGGAATGGATAGAAATTGA
AATGGCATAGATTGAAAGGATGGGAAATAGAAAAGTGAGGATGAAACTTACTCTCCTCTC
TCAAGAAAATAGGGCCACCATTCACCGTTTTGCTCGACGAATTCCAACATAGATTCCCAT
TTTCAACCCTCCAAAACATGAAAGAGTCACTGTGCAACTAGCGTCTTCTGGTTCAGTCGT
GGAAAGAATGATTTTGCAAGTACTTTGAATCGATAAGCTTCCACCATTGTTGGCATCCAA
GTGGGTTAATGTCATGGCAAAAGATGTGGGCTTCTCTAAATGTCCACAGCACCATTATCG
TTCCAATCCATCACAAATTTCTCAGAGGAACCTCATTCAGTACTTAACCTTCATCTTTCA
ACTCAATCACTTTGAACCAGGAAGTTTTAAAATCCATCCGGCTGTCTGGTTTTAGACGGT
TGAACCACATTAAAGGTTCTAAGGTTTAACTTTGACCGGTATAGGAACCAGCCCGATCG
>comp205_c0_seq1 len=379 path=[357:0-161 519:162-185 543:186-378]
TCTTACTCCTTCCTCTATTGTCAACAACGTTGGCTTTAAACTGGTTGTTCAAGCCCCTTT
CTCTCCGTCTTGACTCTTTATTTAGCAAACTGTTTGTAACAGAATTCATGCTAAGCTTTC
ATTCTGGAGCAGAATTGCTAAGAGTGACAACTAGAGTGTCCCAACTCTCAGGCAAAGAAC
TGAGGAGTAGAAGAGATTGCAACTCATCGTCTATCTTTATTTCTGTCTTTGTTAGTTGAT
TCACAATACCTTTGAAGGTACTCAAATGTTCGATCATGTTCTGACCTTCCGAGTACTTCA
ACTTCACAAGTTGTCTGACAAGGCGGGCTTTATTCCTGGGCGTCTTCTTTTGAAGCAAGG
ATTCAAGTTTCGTCCACAA
>comp206_c0_seq1 len=628 path=[606:0-627]
GTAAAATAAGCAGACAAGACAAGGAAGCTGATGTAAACAGAGTTGAAGAAGATTGAATTA
ACATAAGATCCAGAGTGAACAGCCAATAAGGAGGGTAGTGGGTTCAAGTTATGCAACAGC
TCTAAAGAGATAAAATAGAAAAGGTAGAAGATAATGACTATTTCTTGTGGCCATGACAAT
GAAGCAGAACTCACTCTTAAAGAGGATTATAAAACAACTAGCAGCAATACTCTGATCTCT
CTAGTTTTTCTTGATCAAATGTTATGAATATTCCTCATAAAGCTTACTATAGATCTATTT
TAAACACATGCACCTCAGTTAGCTCTTGCACTTGTCCAATGGCTCCAAGAGCCTCAAGGC
TTAATAGGACCTAGAATGTTGACATTGCTTGGAAGTGTATGAATGAAAAACAAGATTCAA
AATAAACACCAGTTTAAAAGAATCTTATAATCACAACTTCACAATAATAGTAACTTGGAC
TTAGATCCAGGGTATGGAATTTTCATAAACAATGCAAGCTGTAACTGGTTAAATGTGACA
AGGACTATAGGTAATACAACCTAATAACTATAACCTCAGATGAATCACAAGTGTTTTGGC
TATTCTGACACCAAAATTTTGCAAGTGT
>comp207_c0_seq1 len=605 path=[583:0-604]
GTGTTGGCTGTCTACCATGATGACGTGAGAATTTAAGATTCTGATTACTTTTTATTTGCA
AATTCTGATTACTGTTCACGTTGTAGCTCAATTGCCTGGGTCTGAGCTGCTCTCTCATGG
TAATGAGTTTGAGTCCTGCAGTTGGCTTATGCATGATTCTTATAGGTCGAAAGTAGGATC
CTGTTTTAACTACAAAGCAATAATTAACAATTCTAAACATTTTTCGTTATCTTATTACAA
TTAAAATGTCAAGGCCTGATTAGAAAATTTAGTTTTGCTAATAATTCCCTTCTGCTATGG
TTGGATTGGTTTTTCCATGATGAATAGAGGTCTCATTAGGATTCTTTGCTTTATAGTTTT
AATTGCTTGACTGCAAGTGTCAAATAGGAAGTACTATAAAAGGGTCTGTTTGTGATGGAG
TTTAGTTGATTCTATTGAGAAAGGTAACATATCAATTTGCCATTAAATTTGGAGTTTGTT
TCTATCGACAGTACCCTAACAAGATATTGTGGTAAAGTTTTGCCTGAGAGTTTATCCAAT
GTTAAATGCATAGGGTAAAAGAAAATCTGACTGTGGACCATTAAAAACTTTTTGGTATTG
TGTGC
>comp208_c0_seq1 len=526 path=[1:0-292 923:293-525]
GTTTTGTTTGGTTGTCCTATTTATATTTATCAATAATCAAGCATAATAAATTTTCCTGTA
TGTTTCCAAATTAGCCAACACAAAAAATTGTATAAACAGGCACCAGATTATACAAAAAAT
TATAAGACTATAAGAACTATAAGTATCATCAATATATCTTCCAAAGTTAAAGATTAGTTC
ACAATCATATTCTACTTTAAAAAAAAAATTGATCTCTCTCCAAAGAAAACAGATCAGACT
TGGTTTAAAAAGTACCCAGCATCCAGCCCCAAAATCATATACAAACTCCTATTTACCCTC
CCTTTGATCAACCCAACTAACACCTATTCAAAAAAAAAAAAAACTAGTGCCATGTGTCCA
AGGATAATTGGCCAAGGCCACAATCAAAATGAAACCAATGCCAAAGATAATAGAAAACAA
GAAAAAAGCTTTAAATTCAAAATACCAACCACCCAACCCCGAATTGATAAACCATGACAA
GACTCAAGAATATAAACCATATGAGAATTCAGGAACCACCTTCTTT
>comp211_c0_seq1 len=354 path=[332:0-353]
TTACCCATGTACTTAAGGAAGGAGAGAAGTTTGTTGCAAAGATATTTAGAGGGAAAGACA
GAAGCCTTCTATACTGTCAGGCATTTGAAGTTTCCCCATACTATAAAGGATTTTGGGTAG
TGGAGCCTTAGCCATTGTTTGACATTGGCAAAAGTATGGTTTTCTTTTATCTCTTGAAGT
CCTCCTTTTTTTCTCTGGGACTTATATGATTAACAATGGATGAAGATTGGAAACCTTTGA
AAACAATGGAAGTAATCGAAATACCACAAGGTTTGTGAATTGAAAGCTACGCCGTCATAT
TTTAAAGATGCAGTGTCTTCAGTAGAAAAGGAATAACAAAACCCTCTAAAGGGA
>comp212_c0_seq1 len=463 path=[441:0-462]
ATTTCCATCAGTAATAGCAAAGGTAAAGAGATCAACAATCTAAGGATATAATAGATAGAT
AGTATAAGGCCATTAGGAACACTCCATCTATGCACAGTTCAGCTAATAAGTTAAAGACTT
AAAGCCAAGCAATGGAATCATTCACAATGGTTCCAATAGTATTATTTAACTGACTCGGAC
AAGTAAACATTTGCAACCACAAGTCAACCACCAATTTCAATCCCTCCATCAAGAGTCATG
CTACTCATTTGTTCAACGCCAACATGACAATAGAGAAAGAGAAAAGGGCGGGGGGAGGAG
GAAAGAAAAGACCAAATGCATAAATTGCAGTTATCTCTTCTTTATTTTGGTCAATAATTG
CTGTTAAAACTGATGAAACAAAAGTAGAAAGCAAAGGCTACCATGTTGGAGATTATTGAC
TATATGATTATCTTCAGTACCCACCCACGTATTTGAAAACTGA
>comp213_c0_seq1 len=564 path=[205:0-563]
GAAACGGCTTACGTTTACTTAGGTTGTTACTCGGAGAGAAAAGTGGATAGTAGGAATTGG
AACAGAAATTACTTTTGGTCTGAAGTCCATTGAACTTGGGGTCAACCATCAGTGGTTGTT
TCACTAATCTTTTACCTGTTGCTTTTAAAATTTATCTTGGGAACTTTGACATCTCGTGTT
TTTGGTCCATCCTTAATACATACATATCTCGAAGGCTGTTACTAGGAAATTACTTGTTCT
GAGTTAGTTGAATGCAAAAGTGTGTTTTTACCTACCTCTTGGAAGAAACTATGGCAATTA
GACATTTTATTGTTATCTTGGTCCCATCTTCAGATGTTTGTCCAACTGCGCTAGTTTACA
AGCAGATGATCAAGTAGTGATTTATTTCTTGTTTTAACTTTCTTTTTTCCTTTTGGCTAA
GTTTAGTGGGATATATTGGTCCTTTGCCGCAGGCAAAACTTCTGAATTAATTTATCATAT
TCACCTGTATAGCTGTCTCTCCAAACTTTCCCTTACACACTTGTTTTATATTTTGTTGGT
GCAGGTTCCCATGTTCACAGCATC
>comp214_c0_seq1 len=368 path=[369:0-238 608:239-266 636:267-367]
AGCAGCACAAGCATTCCAGCCGTCTTCTACACAGATCCTTTTTCCCTTATAAGCACCATC
ACTGATGTTAACACCACCAGGAATGGTGTTGACATTTCTGTTTTCTGGAGCAGCAGCACC
AGGAATAGTCAGTGGCTTATTGGATAAGGGAAGGCCAAGCGAAAGCCTATGAGCATTGTT
GAGAGCATCGGGTTGTGTTGGAGGCTGAGGAGTAATCCGAGTGTCTGAAACATTGGCAAG
GAGGTTTGGCGTTGGAGTTTCACCATTAAATAGTTGCTGAAATTTTAGAGCTTCTAGTTT
TTTGGCTGCAAATGCTTGAGCTGTTGGTCCCAATTGAGGAGTAATCTGAGTGTCTGAAAC
ATTGGCGT
>comp217_c0_seq1 len=615 path=[593:0-614]
ATGTCTCCTGGATGCATCCCCATCACTATTTCTAATGCTACCACTCCAAAGCTATAAGCA
TCACATTTTTCAGTTACAGTTAATGTATAAGCAAGTTCTGGAGCAATATATCCATATGTA
CCAACTACAAGGGTTTGATTGGAGGAGTCAGGATCAATGAGTCTGGCTGTGCCAAAATCT
GAGAGAAATGCTTCCAATTCTGAGTTCAACAAAATATTGCAACTAGAAATATCTCGATGA
ACCATTGCAGGTGTACAATCATGATGCATGTAAGCCAAAGCATGTGCTATTCCTTTAATG
ATGTTCACTCTCTTGCTCCAATTCAACTCTTTCGCTTCCACATCATTCCTTAGGACACAA
AATAGGCTTCCTCTTTCAAAGTATTCATAGATCAAAAACATGCACCGATTGTGTAAACAA
AATCCATAAAGCTTAACAATATTCCTATGACGGATATTTGTTAACATTTTGACTTCATTG
CGAAAGCACTTGTCAAAAGATGGATTTTGAGATTCCAATCTGTGAAGTTTCTTCAAGGCA
ACAATTCTACCATTGGGAAGTTGTGCTTTGTAAACACTACCATAAGCGCCGGTTCCAATG
CAATACTTGATATCA
>comp218_c0_seq1 len=306 path=[604:0-305]
GAGTTCTCTCACAATCAGCTGGGTCAATTAAGATCTTCCACATATTAATTTATTCTCTAG
TTTATATAACCCTCACAAAATCAGAAAAAGAAAAGGAAGACACCACCCAAGAAAGCTGCA
TTATTCACTGCTTACCAAAATACAATAGTAATCCCGGAGATTATTTGATATCCCAGCCAT
GAAAAATGAGACAATTACACATGCGGCTTAAATTCTATGATTTATCTCCAAAAACCAAAA
TTATATATCATTAGTATTCTTAAACTAGTTATACAACACAATGCAAGTTAATATTTAATT
TCAAAA
>comp219_c0_seq1 len=425 path=[403:0-424]
AAGCTGAAGATCAACCACATTGGACACACTGGTTACCTAAACACAGTGACTGTGTCTCCT
GATGGTTCCCTGTGTGCTTCTGGCGGCAAGGACTGCAAGGCTATGCTTTGGGATCTCAAT
GATGGCAAGCACCTGCATACGCTGGACCACAATGACATTATTACTGCCTTGTGCTTCAGC
CCCAACCGATACTGGCTGTGTGCCGCTTACGGACCCTCCATCAAGATTTGGGACTTGGAG
TCGAAGGATATGGTTGAGGAGCTGCGACCTGAAGTTGTGTCCTCCACCACCAAGGCTGAG
CCTCCCCAGTGCCTCTCACTGGCATGGTCCACTGATGGACAAACTTTGTTTGCTGGTTAC
TCAGATAATATTATTAGGGTCTGGCAGGTTTCTGTTTCCGTGCGATAAGGGGGAGTTTGG
CAAGG
>comp219_c1_seq1 len=733 path=[1515:0-732]
AGCCTTGCAGTCCTTGCCACCAGACGCGCACAATGAACCATCAGGAGAAACGGTCACTGT
GTTGAGGTAGCCAGTGTGGCCAATGTGGTTGATCTTCAGCTTGCAGTTGGCAAGGTTCCA
CACCTTAACCATCCTGTCCCAGCCAGCAGAGACAATGATGGGATTATGGTGGTTGGGAGA
GAAGCGCACGCAAGATACCCAGTCACTGTGACCCTCATCCGTTATGGTGTATTTACACTC
AGCAAGTGTGTTCCACAGCTTGATGGTCTTGTCTCGGCTACCAGACACAATTTGACGGTT
GTCCACAGAGAAGGCCACACTCAGGACATCCTTGGTATGGTCCTCGAATCTTCGGGTGGA
TCGCCCAGCAGCTAGATCCCACAAGCGCAAGGTCTTGTCCCATGAGCCAGAGAGTGCATA
GTTACCATCAGAGGAAAGCACTACATCGCTCACAAAGTGTGAGTGACCGTACAATCGCTT
CTGAGGGATACCATAGCTGTGCTCATCACGGGTCAGCTTCCAAACAATAAGGGTCTTATC
TCGGGAGCATGATAAAATCATGTCCGGATATTTGGGGTTGGTGGCGATTTGGGTAACCCA
TCCATTGTGGCCTCTTAAAGTTCCACGCAGCTGCAGGGATTCTGACGACATTTTCGTCTA
TTTCAGGTCCAGTCAAACACGATTGATAACGATTAATTCGGCATCAGCCACACACCACAG
GCGCCACGACGAG
>comp220_c0_seq1 len=375 path=[1:0-150 313:151-374]
ACAGCAGCCTCTACATGTCCACTGCAATAAATAACAAATAATTGACAACAATTTCCATCT
ATGATCCAATGTCCTCCTATTGTTTCCAGAAGTCAATTATTGATTGGACTCCTGACAGGT
GTTGTGAGGGAAATGGAAGGGTACAAAATCTAGCCGATACATGACCAGACTTCAAAATTT
ATGATGCAGCTAACGTGTAAAAAAGAGCCAAGAAAAATAAACCCTAAAGATGTAAGAAAT
TCTATGGCTCAACCTCAATATTAGGCAAAAAAGATATTTTGATTTCAAGCTCACCGCTAA
GAATGTTTTTAGAACTCTATAGTCTCTAAAGTTAGGGGTGTTATGCTATGGGCTTCACCA
ACAATAAGCAAAACT
>comp222_c0_seq1 len=444 path=[1:0-443]
GAAGTCACATTGAAACCTGCAGATTGAATTAATAATTAATAATAATAAACAAAACAAAAC
AAAAAACTTAAATCACCACAGATATACTACTAGCTTGCTCGTGGATCAAGGTCCATCCAC
CATCATGTATCGATCTACCCTTGTTACCGCCTGAGAACGCCATCACCAGATCCCCACCAT
TGATGTTATGAAGCTAATTAACCTTCCAACCCTATCCTCTCTTTCAATTCTGAAAGGTGC
ATGGAACTTGATCCACCGAGACTACAAAGATCTTTATTTCTTTCTCTCTTATTTCTTGCC
ATTTATTTTCAACCACTTCTAACAATAGTCTCTCTCTTTCATAAGCCTAAAATGAAATGA
AATAAAAGAAACAATACAGAGGAGAACAGGATGACCCCAAGAAGAAAGCGACAGAGGCCA
AACACCGGACTATGGCGGCCGCCG
>comp223_c0_seq1 len=469 path=[379:0-468]
CAATGTATGGCTCATTGGCTCATGAGTCATGAGATTTGACATGCTTAACTCAAGAGTCAG
TTTTATTTATATAAAAAATGATTTTATTGACAGAGTAACTCAATTCCTACCATTAGCCAT
CACCCTTTTAATTAAACCTAATGATCAATATGCATTAGGTATTCTGCCTTAATGATCAAG
ATATATAGCAATGACCGTGTGAAATGCTGTGATGAATCATGATTAGATCGCTTCCCTTCC
AAGTCTCACTGTGCATTTTTAAATAATAGGACGTGTTACTTGCGTTTCAGATTATACAAT
AAAGTATAAATACTCATGATGTGATATCTTTGATTTAGGGGTTGGCCAGCAATAAGTCAA
ATAAATAAATAAACTGAATTGCCTTATTCTTTTATATTGAAAGCATTCTTTAGTAGAAAG
TATCTTCCTCTTTAATAGCTATAAAAAAACAATTATTTTTTTTGGGGGG
>comp225_c0_seq1 len=306 path=[1:0-305]
GTTATTTTATCTCTGTTGATAGTTTCTCAAAAGCATCTGCCCAAAGCAATTCAAAGACAA
GCAAAACAAAGTGCATTAATTACTGATGAGATCTCTGACACGAACGTGACTTTCAAAATT
CAACTTTATACGTTGGAACTGACATACCTAACAACTAGAAGGACCAAAAAGTAAGGAATT
TTCTGCTTGCTTAGAAGAGTCAGAACTAAAATATCAAATTCCTCACAAACGTTGATAACC
AAAGCTACTTTTCAGAAGGAGATTAACATGTTATCAGCATTGTGTATTTAATGCTACTCA
GAACGG
>comp228_c0_seq1 len=1074 path=[1:0-1073]
TTCAGCCAATCAAAACTTCAAAATAGTCAAAATGGTGTAAAAGTTCAAATATTTTGGTTG
ATTTTCCCCCTCTTTTAGGAAATGGGGTTCGGTGATTCTGGTTAGGGTTTTAAGGACTAG
TCTAGGATTTGTCTTGGTTGAAAGAATCTTTGGTCACGTCACACATGATTTTTCAGTTCT
TGACTTCTGACAAAAGAGTTTATGCCATGATTCCCATACTTGGTTCTCTTTACCTCTTCC
ATCTGAACGCTACATTTTATCTTCTATAGTGCAAACACCCCGCACTGGGAAATTTTTCTT
TCTTTCCCTTGTTTTCCTTCTCTCCTCTTTATCAAAGAGTAAAAATTCTTTTACATAGCT
TGAAAACAGCAAAAGACAGTGAAAGAGAGTGATGATCCAATAAGAGTGACCGAACTGGCT
TATCATAATTTCACCACTGTTGGTATCCCAGACTGAGATTTGCAATTGCTCAAGATCTTG
CATAGATATATTTATGAAAGTAATGGACTGAGAAAGAAAAAGAAACAAAGAAAGAAAAGG
GTTTTCTAGGCTCGATGAGAGAGGGAAGAGAGAGAAAACGGGTGAAGTGAGTGAGTGAGG
TAAATGGTGGCAGAGACAACGTACGACAATTGTGAGAGCCAATGGGAGAGTTCTGAGCAT
TTGGCTTCTTCCATGCAATGGGAAGCGTAAAACTATTGCTGCTGCTGCTATAGCAGAAGT
TGAAATGGACGGCTGTGATGTTCACAGACTTTCAGACAGAAAAGACTGAAAAAAATCATA
TTATATTCAATAAACTCACTTGAAAATTTTAAAAAGCTTGTGCTAAATGCATTATTTCAA
ACTTTACCAAAATAAAAAATGCATTATTTCAATTTTATATGGGTTCATCGAGGTGGATAC
TTCAATGGGGTTGAGGGTATTATCCATTGTGAAATGGGTTTCCGCCAAGTGGCAGAGAAA
AATAGCCCTAGAAATGGTTGAACCAATCATATTGTGGGAACCTGTGCCAGCGTGGCAGAG
GCAGCCAATCAGTGGCTCGAGGAAATTAAGGTATCAGCAAATTGCAGAATGCAG
>comp228_c1_seq1 len=312 path=[2103:0-311]
GAAAAAGAGGAAAATGATCTCTAGGGTTTGTAAAAGCCCAACAATAGTGTCTCTCAGATT
ATGCAGCAAATTTCTCTTTGCTAACCCATCGCAACCAATTCAGCTCAGAAGCACTCACAC
CCAGTTAAAGATTTTTCTACTCCAAACTTGAACCGAGGTTTCCCCAAATCTCACTTGCAC
CCACGTGCAAGATCTCAGCTTGGGTCAAACACAACCCAAAAGATTAGGGTTTTATTAGCA
ACTACATGAGTTGGGTTTCACTTAATCAAGTAAAAAAAGAAACTTTTTTTTCTTTCTTTT
CAGCCAATCAAA
>comp229_c0_seq1 len=864 path=[1:0-863]
GAAACGTACAAGTACAACCGCAAGCAATGAAGCACCTTCCTCAAGAAGTGATGGTGGAAA
TCCTGTTACGCTTGCCCGTGAAATCTCTTCTGCGTTTCAGGTGTGTATCCAAGCTATGGC
TGTCTCTCATCTCCGACCCCCACTTTGCAAAATTGCATTATGACCGATCTTCCACGCACA
ACACACATCTAAATGATCGAATCCTTTACACAGTAGCTTTTCATGCTCGGTCTGTGGATT
TCAATGCACCCCTTCACCACGATTCTGCTGTGGTAAGGCTTGAGTTCCCTCTCTCCACAC
CACCAGTTCCTGTTAGGATCATGGGTTCCTGCAGAGGCTTTCTGCTTCTATCTCTCAATG
ACATGCAGAATCTTCTCCTTTGGAATCCATCAACCGGTGCCTGCAAAGGAATACCACAAC
CTCCCATGTGGGTTAACAAGTATGTGTTTTTGTGTGGTTTTGGTTATGATGCATCAACAG
ATGACTACTTATCAGTTCTAGCATCATGCGTCGACTACAAGGCTTCTGTTTTGGTTACCC
AGTTTGAGATCTTCTCTCAGAAAACCAACTCATGGAGAAAAGTTGAGGGTCTAAGTTGCC
CATATGTCAATCTACGGAATGATGCCGTGGATGGTCCTAGGGTGGGGTCCCTCTTAAACG
GTGCTATTCATTGGTTGGCTTTGGGTATTTATGGACCACTGGTCTCACGAGGTGTAATTA
TTGCATTTGATTTAGAGTTTGCAAGAAGTGCCTTTGCCTGATGATTTCGATGATGAATGG
TGTGATTTGGGAGTGTTTGGAGGATGTCTTAGTGTATTTGATATGAACCATTATGAACTA
ATTGAGATATGGGTGATGACAGAA
>comp229_c1_seq1 len=345 path=[1683:0-344]
ATATTCTGTAATATATATTGCAAAAAAAAAAAAATCCTATCTAAAGATCAAAACAATGGA
GAAGATGCAGTATCTAACCTCATCATTGCCTGTCTTCTAACTCTTCCCCATCATCGCGAG
GGAGGGAAAGTAGACTTTCGGTATACACACTTGCAGCTGCCACAAACCCTATTGGAGGAT
CACAATATTCATGGTGTTCTACCAGCTCTCCTTTATCATTCCATTTTACTAGTCCTACAC
CACCATCAATTCCAACAACTTCACCACCTTTGGAGAAGCATATTGGTGAAAAGTAATTGG
AAGGAAGAACTTCATCCAATGACACAGTAATCAACTTAACCCAAG
>comp233_c0_seq1 len=494 path=[315:0-493]
GATTTCAGAATGAAGTCTTCTTCATCTTGAAACTCTCTTGTTATTCATCTTCTAAATAAT
TTTGTAGCAAACACAGCACAAGTTTAATTCTTTCATCAATTTCGATATATAGATAATGGG
AGGGGAAAAAAGAAAAGCAGGGCTCTTCTCCCTTCTGAAGAATCAATATTAAGAAAATCA
AAGCAATACAGGCAATGGCGTCCAGTATTAGATTCTTCAAAGTAGGAAGCAAGTTGGGCG
TATGGTATGAAATTTTACCAGTCAACATAGCTAGATTTTTCAAATCAAAATTTCTGAAAA
CCCAGTGAACTATAGAATGAATCTGGTGACTGAAGATTTTATAGAACTCAAAACTATTCG
CAGGGTATTATACTACCATCTTCAAAAATAGAATCCACTTACACTCGGCAAATTGTGCAG
CATATTTTCAACAGCTATCATGCTCTTTCATTTTTTTTATTTTTTGATAAAAACATGTTC
TTTCATGTTAGACA
>comp236_c0_seq1 len=445 path=[423:0-444]
ATCGCCCAAGACATGGGATTTGTGAGCTCGGCAAGCCTAAACGCAAGCGCTGCAGTGGCC
GTTCGCAATGAGGCAAACAAGAGCGTATTCTTCCGATGCTCCATTGAAGGATTCCAAGAC
ACTTTGTGGGCGGTTTCCGGTCGGCAGTTCTACAAAAACTGCGACATCTATGGGACCGTG
GACTTCATCTACGGTGGTGCTGCCGCAGTGTTTCAAGACTGCATGGTGTACGCACGTTAT
CGAGAGTATGTGACCTTCACTGCTCAGTCACGAGAGGACCCAGATGAAAACACAGCCTTC
ACATTCCAAAGGTGCAAATTCACCATGTCCCCAGAGGACTATGACAGAAAGTCAGAGGTC
CATGCCACCTTGGGTCGTCCATGGAGGGCCTACTCTACAGTGGCCATCTTAGAGTCTTAC
ATAGACTCCATGGTGGATCCTAAAG
>comp237_c0_seq1 len=304 path=[206:0-160 367:161-184 444:185-303]
CCCTATTATACTTATATCAGAGTACAATATATTACACAACATATTATAAATACATAACGG
AGTTCAATTCCACCAAAATACAAGTATCAAAATACAATTTATTGCTAACAGCAATAAACA
ATAGAATTCTCCGTACTTAACCTGTAGAGGGTCCGGGATTCTCCTGCGAATCTGAGAAAG
AGGGGTGAGAACAACTTCCCAATGAGTGTGAATATAACTTGCGAATAAAGTATGCATGGA
ATTAGAATGCAAGAATAGTAATCAATTCAACTTATCATATAATTTCATTCCATTAATATG
CAAT
>comp238_c0_seq1 len=642 path=[636:0-641]
ATCAAATTTAAACTCTTATCTTAAATAAAAATGTTGTTTGCTTGTTTATTGATCAATCTT
CATTTTAAAGAAAACTATAATAATTAGCTACTGTATCACTTTCGTAGTGTCTCCAGCATA
GAAAAACGTTACTCTGACAAATGTTTGTGACATCTTCGAGGAGACACATTTTTTTGTGTT
GTTGATGAGATTCTTTGATGATGTTAAGGGTGCAAAGGATTTCACATCACTTTTCATGAA
TATAACTTAGTGGTATGTCATGATGAGTAACATTGCACATCGTTACCTGTTTAGTATGGA
ATAGATTCTAATAATTATAACGTCACGTTTGGTATACAAAATGGTGATTCCATGGAATGA
GAATTGAATGGAATGGGCTGTGTCAAGGACCGACTAATTATTCCAAAAGCCTAAGTTGTT
AGGTGAAGGCTATGAGTCATGAATGGCTTTATATCTTTAACACTCCCCCTCAAGCAAGAG
CCCTTTGGAATTGAAGCATGGAAAATGCACAGACCCACTATACCTTATGCTGAAATCTAA
CTTTTTATTTAGAAGAATGTGGGTGGTAAGGGTCGAACTCCTGACAACTTAGTCATAGAG
GTTCTGAAACTATGTTAAGGACCAACTATGCCAAACGCTTAA
>comp239_c0_seq1 len=485 path=[219:0-372 130:373-484]
ACAGAGTTTTGAGGAAGGAAATTATGGAATAATGTAATGATGATAACAAATTGGATCTCT
ATTTTGTTGATCTCTTATGATAATTAGTAGGTACATTTGACTATTAGATTGCATCTATAG
TAGCTTGCAGTCGCAATGTTCACTACCTTTACTGCTAACGTGTTAAACCAACTTCAATAT
TTTCAGTTGGAACGCAGCTCATAATAAGCATACAAGAGATGCTTATCTTTGTTGATGGGC
ATTATATCATCACACTCAAGACATTTTGCGGTCATACTAATGAATTTGTGATTGCTTGTT
ATTATGTGTTGGTTTTATACAACAATCACTGGCATAAGAGTCTGATATCATTTATGCTGA
ACATATCTTGTGTAGGTTTTGTTCAGTGTGTCCTACTGCTTGATATTTGTAAGTGTTCCA
TCTTTCATATGAAAAATGCATTGATCTATCCTTTTTGCTAATAGATTCTTGGCAATTCGG
GTTTG
>comp240_c0_seq1 len=383 path=[1:0-382]
CCACCGTAAGCAATTAAGCACAACATCAAACTTCCAGAAGATGCAATTTATCTCTATTTC
ATAGTACATATACAGATGTCTATATCCATGTAGATATGAATGAATGCGAGCATGATGTAT
GTATAAGTAAACAAACAGAAATAATATTAGTAATCCAGGTCTTGTTCCACAAACCCAAAG
GCTTCCCCGTTCCTCTTCTACCAAATAGCTTACCAGATTGCAGCAAACTAATGAAAAGCA
TTCAAACTCTAGCCTATACACTGCTTACATTACCAGCAAGCAATTGGCCAAAAATAAAAG
AGTATCATAAACTTTTGTTGCAATCAATTGTGAAAATACACTTATATGTCTGCAACAAGC
ACTTGGACAGAAAGATGGAGCCC
>comp241_c0_seq1 len=328 path=[1:0-327]
AACAACTTAAATAAGTACTTATTCAAGTCGAGCTCATTAAATAAGCTCTACTCTCATAAG
TGTGCTCTAAAATAAGCTAACAGAGACATATCTATACTTCTAGAGGACAAAGGCCCATGA
CATTCATCATATACATGTCTATGCATATCGAAATAAGGGAAAGAAAGAAAATCCAAGACA
GGACATGAAACAGTCCAAAGACATTGACCATGATTTGAATATGTTCTGTAAAGTACTACG
ATCATATGAATGTTTAGACAATTTGAAAGCTATTCGAAAAGAGAAATTGGAATAGATATT
GAATGACGACATGTAGTTGACTTTCCAT
>comp241_c1_seq1 len=601 path=[611:0-600]
TTCACATTGACTCAATGTGTAGTGAATAGAGGCAAAAAGCTAGTTCACCAAAAAAATTCT
GAACATATTGTTCTAGGATAGTAGAAACTAATTGGCAAAATTTCTTATGAGAAAATAAAA
CAAATTGAATAGAGGCTGGGGTAAGTTTAGAATCATTATAACCATAAAGTTGACAACTGC
AAGGATAAGATTGAATAGTTAATATGTATATTTGTCTTTCAAACGATAATTAACATGCAT
AGTCAACAAGTTTGAAACATATACCCAAACAATGCTCTGAAATATATGACCATAGATGTG
AACATCAACAAGTATGCTCATAAGTGAATGATATAGTAATGAGAACAGTCATGATGACAA
TATTCTTTTACCCGAGGTTTCAGTTACATTTAAATGAATGTCAAATTAGTGACATTCTTC
ATCTTATTGTGTCCGGCTAATATATCCAAATAAATAAGTATTTTGTTCCTCGTCCTTATT
TTGTTTTCATGATGCGAGAAAAAAGTGTTAACATATCATATTTTCTAGCTTCCAACAATG
AACTACTCTTTCATTTTAACTATGATATATGATCCCAAAGATATGGAAAGTCAACTACAT
G
>comp242_c0_seq1 len=402 path=[380:0-401]
GTTTAAAACTTGATTATCTAATACTACTTTATGAAATCTAAGTATGATCCTTTTACTTTC
TCTAAGTCTTTTCAGTCAATAGTTTTTTGTTTTGTAAACAAGCTTAGTGTTAGAATTTGT
AAAAACCTGGCAGAGCTCTGTATGTGAAGCATTTTTTGTTTGGAAAGAGAGATTATGTTA
GAGAATATATTCTAACCATATTCTGGATCAATATACACACGGACACACATAAAGGGTAAG
AGATGGAAAATTTGGTAGCATAAAATTCCTTTATTTTGACCAATAATTTTGTATGCAAGT
GACTACATGGGTTTCCTTAGAACTTTATTCTATCTGTGTTCTTTAATAGCTATTGAGGAT
TGTTAGAGATATAAACCATGGTATCAAAGCCTAAAGGTGAAT
>comp243_c0_seq1 len=595 path=[1:0-345 1164:346-509 509:510-594]
TTTAATAAAAAAGATTTATAAAAATATCTGAAATATAAATATTTTCTTTTGATAAAAGAA
ATATAAATAAATTTGAACTGCATTACAGGATGCCATTACCAACAGATTAACTAAATTATG
GGGAGAAAAAGTATACACTGTCTACACCAGTGTTTTAAAAACCGATCTAACCGGACCGGT
TGAACCGGTTGGACCGTGGACCATGGACCGGTGACCTCTACACTCCATAGAACCAAAGTG
CCAAACCCGGACATAAGTACAAAATAATATATGCTTTATTTTTTAGATAAACTATTGTTA
AAGAGAGGTTGCAGGAAGATAAAAACACCACCAATGAAGTTCAAAAGCTGTTTCTGCAAT
AACTTCCAAAAGCCAAATAATTTTGTAGATTTAAAAAATGACTTTCCATTAGTTTTTAAA
GTCGTCAGTTTAAACATTATAGTAACCCTCAGGCACTGAGGATTCAAATATTTCAAATGA
TTGTCATTATAACCTCAAATGGGATTGCAAGGTACTAAAAATGTTGGCTCAGAAAGAGAC
ACAAGAAAGCAAGTTCTAGTGTCCGGCTTACTGTTTGGATGAAACATTTGAGAAA
>comp244_c0_seq1 len=451 path=[871:0-450]
TCAACAAGCTGAAAATTGAAAAGGTATCTGTTTCTTCTCATCACAATGTTGAGCAGAACA
CTTGGAAGAGAGCATTGCTGTAGACCTTTAGTAAATATGAAAGAAAGAAATAACGCTGGG
ATGGCTTATTATAAGTTTATAACTTTAGGTGTAGTATCGTAATCAGCATTTTTTTCTTTG
AGGTGTCAAACTTTCAATGGAATGATTTACCACCAATAACTTTAGCATATGGGTAAATAG
TGTGTTTATCAAGGCCTAGAAGTTCTAATGATGGGTAAATTTAATGGTGGGATTCCATTT
TCAATTCCATATTAGTAAGATTACCTATTCTTTATTTATGTTTCCCGCTCCCCTTCCTCT
CAGCCCCAATTTGCATCCTCATTGCAATTTTGGGGGTTATCTCTTTAGGCTGGTTGGCTA
AGCCTACACGAGAGATTTGATTAAGGACAAG
>comp250_c0_seq1 len=531 path=[525:0-530]
CCCTCACTCATCTAAACAATACCTTTTCAAAATGGAGGTTCATTCTTTAATATGTGAATA
TGCATTAGCAGCATTATAAATATATTATTATCAGTGATCCAAATGTTCCATATGTATTGT
GGCAGAAGCATGCAATCCACATTACTAATACCAGACTGAGAAAAGATGACAAGTATAATT
AGCACATCAACACTGACTGAGTGCATTTCTTCATAAAGGACACACACCTACAAGCTCCAC
TCAAGAACCTATTCTACAAATGCAATGAACATGAATGATTTACACTCCTCTGACTGAAGA
TCAGTGACATTCAAGACACCCTAACAAGAAAAAAAAATAGACCTGAACTGGTTTAGTCGA
ACTGGCACGGGTTTAACCAGTCACCATCTAAATAGCCGGTTCCCCTTGAATTTGGTGGTT
CAGGAAAATTCCAGTTATAATAGAGAACCAAACCAGCTCACCAGCCAGTCACTGGTTTTT
TGGGCAAGCCAGCCAGTCCAATTCTCCAAAAAAAAAAAAAAACAAAACAAA
>comp251_c0_seq1 len=425 path=[1:0-424]
TCCTGCGGGTGCCAAGGTTCTGATCTACATCATCCTTACCCACCGGAATCCAAAGTACTG
GGAAGACCCCGACGTTTTTAAACCTGAAAGATTCGATCCGGATTTGTGCAAGACTCGTCA
CCCGTACTCGTACATCCCGTTCAGCGCGGGGCCCAGGAACTGCATCGGACAGAAATTCGC
TCTTCTCGAGATGAAAATCGGCGTCTCCACAATCCTCAGGGCGTGCAAGTTGACCACCAC
CACGAACAGTAAAGATCTCAAGTACAAAATGCTCATCATTTTGCAGCCCAGCACGCCCAT
CAAAATCGCCGTATTCCCCAGAAATCAGTGAGCTATTAGTGAGATATTTAGTTCGAACGA
ATCAGCTCGGTTTCAGTGGTTAAAATGAGGTAGGGAGGGGCAGCTGGTTTAAAAGGACAA
TGAAG
>comp251_c1_seq1 len=813 path=[805:0-812]
CACTGGGGAAAAATGGAGGCAAAGGAGGAAGATGCTTACGCCAAGTTTCCATTTCAAGAT
TCTCGAAGACGGTATGGGCTGCATGTCGAGGGGTTGGAGGAAAACACTGGAAGTTCTACT
CGCTACCAAAGGACAACCTGTTGATCTTCAGCCCATTTTGGGAAAAGGAGCCCTCGACAT
TATTTGTGAGTCTGCTATGGGATATGTCTTGGAAGATAACGACGATCGTTCCAACGAGTA
CGTTGCTGCTGTGAAACGAGCCACTCGAGATTCTACGAAGAGAGTGTATAACCCTCTGCT
CAAGAGCGATTTCATATTTGATTTAACTCCATTATCAAGATCACACGCCAAGGACTTGGG
AATTTTGCATGGATTTACTGGAAAGATTATCAGGGAAAGAAAAGCTGCATTCGACGAAGA
AAAACAATTGGAGTATTCAGACGCCGATGGTAAGAAGCGTCAGGTATTTTTGGATACCCT
TCTCGAGATGTCCAAAAAGGAGAATCTGAATGATAATGATATCCGTGAAGAAGTCGACAC
ATTTATGTTTGCCGGCCACGATTCGACTTCTACGGCTCTGCAGTACCTCATGATGCATCT
GGCTGAAAATCCGGAAGTGCAAGAGAAAGCCTACAAGGAGCAACAAGAAATATTTGGCTA
CAGCGATCGGGACCCTACGAAAGAGGACCTGTCGAAGATGCACTACTTAGACCAAGTGAT
TAAAGAAAGTCTAAGACTACACCCGCCAGCTCCTTCCATTGCCAGGTTATTGCGTGAAGA
CGTCAAATTGCATTTGATCCGGATTTGTGCAAG
>comp252_c0_seq1 len=434 path=[1:0-433]
AACTTCTGCCACATAAAACCTGCAAAACAAAGTGCAGATTAATGAAATGAAAATATACTT
AGTTATACCATCTTTGATACTTTTCAAACTATTCAATAAAAAAATTCATCTTTAACTTCG
TCAAAGTCAATGTCTCTTAAACAGGTCACTATGAGCTAATATACCAGCAGTCTTAATCTA
TTTGTGATCTGTTAGATAGGACTTAACACTGACGAGTGACTTCCACCTAGCAAGCTAATA
GAGAGGCCGAACGAATTGATATTGGACTCTTCTTAGCTGTTAATCAAGTGCAGAAGTTAT
TGATGATAACAAACAGGTACTAGTTAATCGCATAAGAAAGAACAAAAACTGATATTTTTA
ACACAGAAAGACCTATGTTAGCACTTGTAAAAGTCATTACAAAAGAATTGTGTATGAAAG
AGAACCAAGTCATA
>comp253_c0_seq1 len=337 path=[817:0-336]
ACAACTTCACAACAGATACACCTTCCTATAGTTCTTTTGGATTCCTAATTTGCATCAAGT
TTGTTCAAAATCAATGGTTCTATTTTTTTATTGAATTTCACATGACTGATTATATTGAAA
GATTTTACCTTGCCCCAAATGTAACCTAGATTATCCAAGAGTGGGCTTGTTTAAACTTTA
AACAAAACTTGACTGGTCCTTTGCTCCCCCTCCCCCCCTAAGTCCATTCATTTTATATGG
CTTGAAGGAGTGCTTAGATCAGTTGAGTGGCTTATCAACAACTTTTAAACGGCATAGCAA
TGACCAGAATCAGTAACATCCATATTTGAAGACCCTG
>comp255_c0_seq1 len=327 path=[305:0-326]
GTATTAGTTATTTTTCTACATAATCGCCTTGAATATCAATACATTTTTGGTATCGTGGCA
ACAGTTTTTTCAACCCAGCTTCATACCATTCTGCCGCCATACTGTTTAGCCATGTTTCAA
CTTCTTCTTTAAGTTCGTCTTCATTTGCGAAGCGTCTTCCCCCGAGATGTTGCTTCAGCT
GCGGGAAAAGATGAAAATCACTTGGTGCAAGATCCGGGGAGTAAGGTGGGTGTCCAAAAA
CATCCCATCGAAACTCTTCAAGCAGTTCTTGTGTCTGACGAGCAGAGTGTGGACGAGCGT
TGTCGTGGAACAAAAACACTGTTTTTG
>comp256_c0_seq1 len=900 path=[878:0-899]
TGCAATTTCTGTTTTCTCTTTGCTTACCAACTGTTTGTAAAAGTGTGTGGTGGGTTATGG
TTATGCTTTGTTTTTCTTTTAACGTCGCTCTTCCGTGCTTCCTTTTTGATATTGCTAACT
TATTATACATCCAAGTCAAGAGTTGAAACAAATTGCATGCGTGCTTCATCAAATCGGTTT
CTGCAGGTAGAACGGGTATAGAAAATGCTTTTTACGGAATCCGAAATAATTGAACGCAAT
TGCAATGATTAGACGAAATTGAATAATGATTGAACTTTTTAAATCTGTGGTTTTAGACGA
GCAAAACCAATCTTTTAAATATGACAAGGAAAAAGAATGATTATGGTAGCAATGTTGAGG
ATTTGTTGTGAATCTATTATGTAAGAATGACTAATACTTCAATTATTAAATTTATGGAAA
TTAAGGCTGTTCGTATGGTAAATTAGTAATCAGACCTATTATTAATGCCAGTTAATATAG
AAATTAAGACTGTATATATAGCAATCAAATCTATTATGCATGCAAGTTCACTAAGTTAAA
TGTTTGACTCCTGTGTTCCAGCAGTAGTGGTGCATTTTGGAAAAGGGTCAACCCTGGGAA
TGTTTCAGCAGTCATTGACTAGGTTTTAGTTTGCAATGATTGAGAGTTGACTGCACACAG
CGTATTGTGGTGATCCAACAACCATATTATAGAGGAATGGATAAATCATATAAATTTCCA
GTTCCTCTTATTTTTATATGATGAAATGTTGAAATTTGTGTTTTGCTTTTTTATGTCCTT
AGATTTAAGTATATGATTACACTGTCCTTAAATTTGAGTGTTGGATATTTTTTCCATTCA
TGCTTCTTTTCATTTCTTCCCTTTGTTCTGGGGTGCAATATTTGAAGCAATTGGGTGAAG
>comp258_c0_seq1 len=947 path=[1144:0-746 220:747-946]
CACACTTGGCACTAGGCGAAGCTGAAACGACACTGTGCACTCCATTGGATCTTATCTTAC
GTTAGGGTACTTGGGATTTTTTCGGAGGTAAAGTAGTTGCGGTTGTAGTACTCGTAAACA
CGGCATGGTAAAAGTAGCTACACCGAGCTCTGTACCTCCTACTTCTCATCGAATCGGAGC
AGGGCCACTAAAAGGTAGATCCATGAATAAGAGAAAGACACCATCTGAAGTTAGGGGGAA
GCAGTTGAAGAGGGCAAGTGTCATGAACCTTGCTGATGAATCTTCATCCTCCTTCACTAG
TCCTACAAAAACTACTGAGGTGGATTTCTTGGTTTTGCAATTTAGTCAGAAACTCCAAAT
CGCACAATTGAAGATAGGGGTTGTTTGAATCCTTCAAAAGATATAATAATCTTCACAAAT
TGATGGCTTCAGTATGATATAACCTTTAATCATTACTAAACTTAATCACAAACAATTTTA
TTTTTGGTAAACCTCCAAAAGATTGACCCTCTCTCATTTCTGCTTAGTCATGGTGCTCTA
AGGTACATAGTTGCATTTCTTCCCCCCTCTTTCTTCTGTACTCTCAATCTGTTTTAATCC
TAAAAGTTATATTGCGCTTACTACAACATTGTCCTAGACAATTTGAATGTCCAGGAAAAG
TTCTATTCATCTGGGTAATCAACAAACATATTGTCTCTTGCAATATCCTCTGTTGATTTT
CCGTCATCAGTGTCTCCTTGTTCTGCACCACCCAAAACCCCATTTGCATATATCAACATG
TTCTATCTGCACTAGCCAGTTAGTCACAAAACATTATAACGCTTAATAGATGTCCTATTA
TATCTCCTTTCCATTAATTCTAAATGTGTGGTTATTTATGGCTTGTTATTTTGTTTTCTT
GAACTATATTAATATACATTGCCCCGAAGACCTGCTGATCCTGAGGA
>comp259_c0_seq1 len=318 path=[304:0-317]
AACTATTGATTGCTGCAACTGTGACCATAACACATTAAGAGACATAAGCTTAGATAACTT
CTACACTTACAAACAGAACATGCATGATATTTAACTAGGTGAGGTTCCCCATTCAATTTA
AGACCATTGGTTTGTAAAAGTTCCAGAGTAGCCGTGTAAATCTTTCCCTTCAAAGGAATA
CCTTTAAACATCAGCTTTTGAAGAAGCATGGCTAAACAGAGAAGGCATTGGAGAATTTAC
TTTGTCGCCGCAAAGAGTCAAGCATAATAAAATTATTAAACTAAAATAAATAACGATTAA
CAGCTAAAAAAAAAAAAA
>comp265_c0_seq1 len=887 path=[1639:0-116 752:117-886]
GGGCTTACAATGGTACTTATAGATCGCCAACCAAAGAGGATTGCTGGCAATGGAAATCGA
ACTTAGCTTCGATACTTACCAGTTAAACCAAACCCCATTGGCTAATCATTTCAGTTTGAG
AGAGAGAGAGAGAGAGTATACCAATATAAAATAGAAGCATATGCTAATCCTGATGCTATA
TCACACTCTTGGGCTAAAATAGAACTTTCAGAAACTACGAAAAACTTCCTATCTTGCCAA
ATGATTTAATTCCCCCGGTTAAATGCCATATACTTGATTATTATAAAATTTTGATTTACC
AGTTGGCTATTATACATACTCTCAAATGAAAACCTGTGTTCTCCCAGAACATTTAACATG
TCCCCAAAAATAATAGTACCTGCTTCTGTTGAGTTTACTTATCTACATAAGACTTGAAAT
TCCTAATGTTGAAAAGTTTGAAATTGAAGGAAGGTTTTATTACAAGAAGGACTTGTACAT
TTGATACTAAATTTTGAGAAAAAAAGAAGAACTAAGATTTCTTATTAAAGAATAAAGATG
CAGGTCAAGAAGTTTATAGATCGTGCTTTATTTCAGTTATTTGCTCTATCTTTTGAATGG
AATTCATGTAGCCAGCACAATTCTTGGGATCAAGATAATACAAAGTCAAATTGAACGTCT
CAGACTAAGAATTACACAATTTCTCAAGGACTGAGGAGTTCAGGGAGCAGTCTCTCTGTT
ATATTTAAAAAGGGTTATTACTGAATTGTTCTCTACATTTACCGTGTCCTAAACCTGCCA
AAAGATTTTCCTAAACTTGTTTGAATATGATTTATGCATGGGTTGGAGAATTATGTTGTT
TTCTTACCTACATTTTCATTCTTAGTATGCAGCTGCTAGAGCATGGA
>comp267_c0_seq1 len=361 path=[339:0-360]
GGGTCACCTCGTAGGACCAAACGCCGTTGTTTCTCTTGAGAGCAGCGACTGCCTCCTCCC
GCACCTTCTGCTGCACGTCGGCGTTGACTGCCATCTCGTAGACGAGGAAGCCCATCGTGT
TGGCTGTAGCGTCGAGGCCGGCGAAGAAAAATTGAGCTGCTTGCCCCAACAACAACTCAT
CGGTTGCTTCAAATACGTGCTCGACTCCCGAGTTGCCGTTGATGTCGAAGTCTTTGCCTT
TCATCTTGAGAACGCCCTCGCCCTTCATCTCATCCAAGATCGTCCGCAGCTCACTGTTCG
AACCGCAACCGCTCAGAAGAAGTCGCGTCGTCTCTTTCATCAACTTGTTAATTCTCTCGT
G
>comp268_c0_seq1 len=365 path=[307:0-364]
GTGCCAAGAAGCTGAGAGTGAAGGTATGACTGGTGCTTTCATTCTGAACTTATTATTGCT
TAACTGAGCTTAGGAAGGCATTGCTTCTTTGTGTAAATTTTGAAGGCTTTGGTTTGGAGA
CTTTGGTTTGATAATTATAAAGGCATGGAAGTGTATATATGCTACAGAGTAATAATCCTT
TCAGACCAAAATTTGGAGTCTAATGTTAATCTGAATAGCTGCTTTTTTTTATGATTCAAT
TTTCTAGTACTGCAGCCATACACTTTAGTAGTCATTATTTGGTCATGATTTTCAATTTTC
AATTTTCTAGAGTTATGTGGGTCTTTGTATCTTCTATCTGCACTAGTTTTTTTTTTTTCC
TGAGG
>comp269_c0_seq2 len=834 path=[1512:0-322 701:323-833]
TCATCAGTTGATGCTGGAGGATCCAGCCCAAATATCATCTCACAACTCAAGTCTTCAAAA
TTAGGGACCATGCTGACTGGCATACCCAGAGAGTCCTTTATAAACGATTGAGATGGCATT
TTGCAGAGATTAATACACATCCCTATACAATTTGTCTCTTCTAAAAACCTGCATTTTTTT
ATGTGGACTACATTTTTTTCTCTTCTCCCGTTGACCTCCGATTCTCTCACCTCGCAGGGC
CCGACTAACCAAGCAAAGAACAAAGTGGTGAAGACGGCAAAATATTCCCTTGCGAAATGA
GATGGTGGTAGCAGTGTCCTTATCAATGAAAGTATTGGCCTTGGGAAGGCTCTGTCAAGA
GCTTGAATGACAACTTCTCGCTGTTGAATAGGATTAAATATTTTTGAAGCCACGGCAGCT
GCCTCTACCAGGCTTTCATACCCACTCTTTCTGTTACTAAGTCCTGTTGCTGCTTGCACA
CTTTTTGATAAATGGTTTATGGCTAAGTGATCAAACCAGTTATCTTTGTAGACATTAGTT
TTTCTTTTCTCTCTTGCAATGTCATCTGCAGGCCTTGTGAGCACTCCAACCACAGAAGGA
TATTGTTCTGGTTTACGTCTGAGTTTCCAGTGAGCTAAAGTTATTGTTGGACTCATGCTC
TGTGCAACAATTTTCGCATCCATAGTGAGTATTATGAGTTTCATGTGTGTGAGAGAACCA
GGGAATGATCGTTGTGTTTAAAAGGTCAATAGAGAGAGGGGTGAGAGGGGCTCATATAAG
AATAAAGAGTGCATGAAAAGCATCTTCGCAGAAAGGTTATGCTCCAGATTCTGG
>comp272_c0_seq1 len=988 path=[1:0-987]
TGCAACACTAAAAAATTTGGCTTTGAATATGTAACATATATTATATCCGTTTTCAATTTG
AGATATACAGGTTCCAGTATTCCACCAACATAATAGATATGATTGGGAAAGGAAGGTAGT
ATGGGATAATAGGAGTAGCACCAAATCCCTTTAAGCATTGTCATCTAGGAGTAGGATCGG
AATCGTAAGCAGGGTGGCCTTTTTTGCAGGGTTTGGAGGTCGTCAAATGTGAAAAACAAT
GTCCTCAACAATTGACTTGGTTATATGTGAATGCGACTGGTTTTCGTTTTTATCATCTTT
GTTCTTTACCTTCTTCTTCCACAGTCCATGTAATGGGAAGACAAAACACAATAGCATATC
AGTTAACAAAAAGTTTCAGCATCAACAGTTATAATTAAAAAGGAATGGTAGAAAATAGAA
CAATGATCAAGCATAGATGGAGAAAAATGTGATGCACTTGATGGAACTATTCACTCCATT
TAACTCAATAAAGCCATACATTTAGTCAAATCCCCCCATCAAGGGTTCAATCCACTGACA
ACTCCAACCCCAGAAAGCATCTTTTTTTTGGGTGCTAAAATGGTAATGATAGGTTACTCT
AATACCACCGATCAGGGCACTTAGTGACATGCCTAGGATCCCGAAGGACATGCAAAGGTC
CACCCAGAGCCAGAAAGCATCTTCTCATCACTTTAAAAATCACCATCTTTGCAGACTCGA
ATTATAATGAGCCGAATGGTTACACAGCATAAATAACACCTTTAGCAGATTTAACATCCA
TCAATCCCACCTTCAGCTTCAGGCAAATGAAATCTTTTTCTTTACAGTATATACTTGCGT
TAATATAAACCACCAACTAAAACAACTTTGTTTTTTGCTTTACAGATAAGGAAACGTTCA
CTGATGGAGAATTTAAGTAGAAGAAATGCAAATTTATAATACTTAAGAATAGAATATAGA
CTTACATGAGATATACTTCCATGGATGG
>comp272_c1_seq1 len=307 path=[1931:0-306]
AAATTTTTTAGTGTTGCAGTTTCACATGATGTCAATTGTTAAAGAATTGAGGAAAGGTCT
TTTTGTAGCAGCTTGAACACTCAATCTCATGGTGTTTTGCTGAAATACTGTGGTCTATGG
GATTTAATAGTGTATAATCTCTAACAGTATGTGCACTAATTTTCATGGTCATATCTTTGT
ACATTGCCATAGCACTTCGCTCAAAATCTTTACACCTCAATATCTCATCTTATCTTCCCC
TTTCCTATATATCTTTTTCTACTCTGTCTTTTCTGTCGTAGAGCAAGATAAGTTTGAAGA
AAAATCA
>comp273_c0_seq1 len=570 path=[1:0-569]
AGGGGAGCCTTTGATGGGTTTCTGGCCGTACTTTCTCCATGCCCAAGAATCGAAGGGTGG
AGTGTTGCTCTCTCCTTTTAGACGAGACCCTTCTGCGTCCTTGATTGGGATTTGCACCAC
CCTTTTCTGTATGGCTCGCCTTCTTTTAAGGGAAGAAGTGGAGGAAGAAACCAAGCCATC
GATGTTAAAGATGGTGGAAGAAGGAGGGGACTCAGCAATGTTTTCTTGAGCTCTGTCAGT
GTCTTCCTGTTGATTGATATATGGGTTGCTGCTGTGGTGGTGGTGGTGGTGGTTGTGATG
ATGGTAGGTGTTTTGTTTTCTTGTCGATTCGCTTAATTGGGTTGTTTGTAGTTTTTTGTT
TGATTGATTAATTTATCTATTGATTGATTGGGTTGCTGTTATCATCTGGTGATAAACTTC
AGAGTTTCCTTAGCCTCTCGTGCTTGGCCCTCTCCTCTTCGAGCCGCCTCTCTAGCTCTT
GCGACTCTTTCATGATACTCTGAACAAATCTAGTTGCCTCGTGCAGGATCTGAATGCGAG
GTGGCTTCTTGTTTATTGCCTTGAATCGGG
>comp275_c0_seq1 len=475 path=[1:0-474]
GCCTGCTTTGCTTGAACTATATACTTTTCAACAAAAACCAACTGAAATCTACATGAAGCT
GTTGATCAAGGACTTAAACCAAACATGTGTACCTCGGGAAGGTGATGATTGGACTATACA
TCAAATGGCTGTTGTTTATTCTGAGACCTTCTTTCTCTATTCACAAACCATTGAACTGTT
CTTCTGGCAATTGGAAACCAAAGCTGCCTCATTCTTTCCTCTTTAAGACTCTTTTCAAGC
AAAGAAGAATCTTTAAAGACCCTGCTTTTCATGCCTAAATCTCCAAATCTAGAGACAGCC
GTGATATCTGACATTGATCTTTTCTCACCCGGATTCACATATTTTGGTGCATGACTCAAA
TTTCCTGCAGAATCTGATGTAAAAGGAGGATCCCTATCAGAAACTGAAACCGAGTTAATC
TTGTTTAGTGCACCGACTTTGCTCTCAAAGGAAATCTTCCTCTCCATCTCTTCCT
>comp277_c0_seq1 len=474 path=[1:0-96 98:97-149 151:150-473]
ATCACCTATTTGCAGCATACACACCCTGCGTTACCTCACTATGACTCATCAGAATGGGAC
TGGTTGAGGGGAGCTTTGGCAACTGTGGACAGAGATTATGGGATTCTGAACAAGTTTTTT
CATCATATAACTGATACACATATAACTCATCATCTCTTCTCCACAATGCCACATTACCAT
GCAATGGAGGCAACCAATGCAATCAAGCCCATACTGGGTGAGTACTACCAATTTGATGAC
ACCCCATTTTACAAGGCATTATGGAGGGAAGCAAAGGAGTGTCTCTATGTGGAGCCAGAC
GAGGGAACATCACAAAAGGGTGTTTATTGGTACCGGAACAAGTTCTGATGAAGAAAGCAG
AGTGAGACTCCAGAAGTTTGTCTTGTATAGTTTAAAAGAAATAAATAAATAAGAACAAGT
GGTTTTAGTGTGTATGTAACTATGTATTGTGTAATGGCCCACTGTCTTGTGAAG
>comp278_c0_seq1 len=424 path=[1:0-423]
TCGACGTCCTCAGGCAGTTCAGAGAACTGCTCGACAGATACGCCTATACCCACGACAACG
TCACTAAAATAATGATGACTGAGAGCTACAACAGCGATTATGACGACGTCAAAATGTACT
ACGGAAACTCCACAGCGCCGATCTCCACATTCCCATTCAATTTCTTCTGGATTACTCAAG
GCAATATGGCAACGAACGCCTCCCAATGGGCCACCATAATCAACAACTGGTACAACCTGG
CCATGCCGACCGGAGGTTGGGCACAGGCCAACTTCGTTTTGGGCAACCATGACCAGCATA
GAATCGCCTCGAGGTTGACACCAGAACACACTGACATTATGAACGTGCTCCAACTGATGC
TGAAAGGGACTGCTGTGGTCTACTTCGGTGACGAAATCGGTCTCCAGGACAGCATGCTGC
GAAG
>comp278_c1_seq1 len=309 path=[803:0-308]
ACGTCGAAAGTCATCGGCTGCTCGGCTGTCATCGTGTGGTTGTAGGAGCCGTAAGAGTAC
GTCGGACCTCCCAGGTAGGGCTCGTTGTTCCAAGAGTCGTTTTCTACCATCGCGAACACC
GCATCCATTCGGAACCCTTGAACGCCTTTGTCGAGCCAAAAAGTTAGCACTTCTTTCATG
GCGTTAACGACTCCGGTACTTCTGTAGTTCAAATCGGGCTGATACTTGAGAAACTGGTGC
AAGTAAAACGCCTTCCTCCCCGGATGATACTCCCACATCGAACCGTTGAAATTTGAAACC
CAATTGTTG
>comp279_c0_seq1 len=580 path=[1:0-579]
AAGATGAAAACAAAATAGGTTCACACCCAGGTTCTTTAGGCACCAAACCATGGGTTTGTT
TGTGTCAAAGACCAACTTTGCTAAAAGCTTAAGCTGTTAAGTGGAGGCCTAAGAATAATT
TTATATCTCTAATAGTTTTTCATAGGGTGAAGTTCCTCTTCCAATTGTCTGTGGTAATAT
ATTGCTCGAATATCTAGCTTTATATTTTGTAAGGAAAAATTTTTCTTTCACACCTTTGTT
TTATGTAAGATTTACACTAACCCAATCCCTGTTCAGAAATTGGTCTAATTCTTGCACAGG
AGATCCATCATTTACATGGAAGGAGAAGTAGCTTAAAGAGATAGTGTAAAAAATGTGAGG
ATATCATTGTCCTTTTGTAAACTATGGTAATTTCTCTTGGTAAACTAAAGAAAAAAAAAA
TAAGGGAGTGAGGAAAGTGAAAGAGTGAAAAAAGAGACACAATAATAGTAAAATTATGAA
TTCAAACTTATAAGCATTTCTTTGTTGTCTTAGGCCCCGTTTGTTGTCTTATTAGAGTAA
GGCTTATTTAATAAACTGTCATAAGCGTTGTCTAAAATAA
>comp281_c0_seq1 len=556 path=[809:0-151 428:152-555]
AAGCTTCTCATTCAACGATGCCATCTTGCTCTTTGTTGTAGTCTCTGAACGAAGCAAAAG
ACAAACAAATGGGTCATGCCATAATATGAACCCCAGAAAAACATAACATACATTAAATTC
TAAAAGTTATTGATGCAATGTCTCAAACTTACATCACAAGAAAAAGGGTCAGCAAAAAAA
TTCAAACTTTACATGTTTTTGGTGTGATTCGTTATGCTCCACCACTTAAAGGATACCCAA
TAACATCCCAGACAAAAAAGACAAACAGAAAGCCAGGTTAATATTGTTTCAGTGTTTATT
TCATTGAGAGAAGAAAAGGGCAATACTAATAGTGCAATCCAAGCTTCGTTGATAGTAGAA
ACGATTATGAGAAAGTAAGTAGGAACAGAGACGTTGATTGAGGCAAAGGGTATGATATTA
CTAAAGCAGATCCTTTGAGACTGAGAACAGTATGTGGAAGGGACCAAATAAATGTATAGA
GAAAAAGAAGCTAAATTAGAAACCCAGAAGAGAAGAGAAGAGAAAGGTGATACCGAATTG
GAGAAGGAAGTCGAAG
>comp282_c0_seq1 len=534 path=[517:0-533]
CGCTAATGTATTGCAATTTGATTTGGCGGTGACGTTATTAATGTTAATGACAAGAATCGG
CAAGCTAAGGATATTCGTCCGTTAGCACCCCGACAAACCACGCCTGTGGTGAACTAATTT
TAACTATCATATAAACACAGAGAATCAAAGGATAAAACTTTGAATGATGCTAAATACTTT
TCCTTTTTCTTTCTTTCAAAAGTAGAAAAATTAGATCATTACAGGATTGCAGGAGGGATG
ACTTAGCTTTTAAACGGGGCGATTGGCTTGTCTTCGAAGGAGGACGTAAATCTTCTCTTT
TATCCAATCTTTATTGTAGGGAGCGTAGGTGTTTGTTCCTTTTTGATACACGAGGCAAGA
CAAATCCGATAGTTGATCGATGAAGTCAAATAACTGGCAGACGTCGTAGGTGATGGCAGG
TGTGTTCGGATTTTGGCGTTTCAAATGCTCCTCGTATATACGACAGACACCTTCCATACA
CTCATTGACGGATTCGTAGTCAGAGTACGTCCTGGTCTCGGGCTTAGGACCTGG
>comp285_c0_seq1 len=998 path=[1354:0-634 379:635-997]
GGCCTCCTTTATTTATCTGGCAATTTCATGATATGCATTCTAGAACAGATCCAGACTTCA
GAATTAGTTTCTGAAACAGATAGAAGTGCAAGTGTCCGTAATAGCAAAATATTCTGTGTC
ATTAAAAACTGCTTAAAATTTGCTGCTAGGTATATGAATTTGTTGAGGATAAAGATGGTG
ACAGACCCACTGCCTGGTTTTGTTGGGACCGCGAGGGTATCTTCTGCATTAGCATGCTTT
GTTAGTTGCCTTCACTGGAAGCAAGATATTTTTCTTTTTTTGGAGATTGTATCCTGTCCA
CTACTTCAATGGCTATCAAATATGGGAATGCAGGATGAAAGAAAAAACGATCAACTTCAA
CTTCTGTGGACTGAAATTCTCAGTTGCTTAAGAAGAAGTCAGCCTCCAATAAACTTCGGT
TCAGCTTTACTCAAACTTCATGAAACCCTGTTTGAAAAAACTCTTGATCACCCATGTCCC
TCCATTTCAGAGCCGACCATCAACTTTTGGAATTCTACATTTGGTCAACAAATTATTTTG
GATTTCCCCCAGAATCTGCTTAGTGTCTTGGACAAGCTATCCAGAAATGGAAAATTAAAA
CTCCAGAAGAGAAGCATACCATCTCTTCAAAAAAAATCATTCCCATGAAGAAGTCAGTGA
TGATGTTCTGCAGGGATACAGGGTCACTGCCAAACATAACAGGACCTCTAAGAGAGTGGA
ACTAGTGTTGGATACACAAAAAGAGGCAAATCCTTCATGTTTAAAAAAAAAGAGGTTAGA
ACTGACCGAGCATCAAAAGGAAGTCAGGCGAGCGCAGCAAGGAAGGGAAAGGGATACTGG
AAGACATGGCCCAGGAATTAGAACTTATACTAATGTTGACTTTTCACAAGGGCATGATGA
TTCGCAAGAAAGCCAAGAGGAGATAAGAGATTCAGAAGCCATATTGCAGATGTTGAGAAA
AGCTATCTAAACTGCATTTGAGTGCTGCATTGACACTG
>comp287_c0_seq1 len=635 path=[1:0-401 826:402-634]
GGAACAGAGCTTTATCCAGTGCTGGTGAGTTTCTATTTTGCTGCTTTCACGCGTATATAG
ATCACCGTTTCACTAGGGTTTTGGTACTCTATTGGTTCGGTTTGTTTTCGTTTCGCTCAT
GAACCCGATCGCTTCCTTTCTCGCTCACCATGAATCTATGCGATGTTACCTAACTATTGG
CAATCGCAGGCGCACACACATGCTAACGTTTCTGTACATGGTTTTTATTTCTAAATTTTG
TCTTGAATCTGAAAACGTGGACAACTGCTGGGCTTGATATTTTTGTGAAGCGGCGTTACT
TTTAAAAGGTCATGTGATGGTTCAGCGAAACTCTGTTCTGTGAAGATTTTGTAATCGTGA
TTTTCTGCGTAGATTGTGGTTTCAAATTGCTCAGATCTATGGCCATTTTGGATTTTTCCT
GCAGCTTCTTTCTATTTTCTGTTTCATTTTGGGTTAAAATGTTTTGGAAACGGAAAAGGA
ACATGTCACCTACATGGATTATTATTATTATTTTTTAACCCTTTTTAGAGTCCTTCGTTC
ATCTATTCATATTTTTATAAAGAAGAGGCATGGCTGATGCTGTTTGGAGCTGATTTATTT
TCTTTACTGTCAGATTGGTACTTCGAAGGTGCCGG
>comp288_c0_seq1 len=331 path=[309:0-330]
GCACCCAAGCCGAGAAGAACAAGAAGATCCCGAACTTCATGTGGCACAACATGGACAAGA
AAGCCTGTGCAATAATGAAGGTGAAGAGCATGTTCACGAACACAGTCACACTTTGCCCAG
CTGACCTAGTCTCTAGTGCGAAAGTTTCACTAGGAATTAGCCACCCAAGTGGGCCCCAAG
ACCATGCAAAAGATGACACAAATGTGCAAACCATGACCACCACCAAGATGGCGAAGCCCT
TGGACAAGTTAGACGAGTTATCTTGGACCTTTGCCCCAAGCACTATGGCGATCACCATCT
GAGACACGAACATTTGAACACCAGCTTCCAA
>comp290_c0_seq1 len=355 path=[221:0-354]
CTCAGCGACGAAATTACACAAATGTCTTTCATGCATTTTATCGTATCATTGCAGATGAAG
GGGTTTTGAAGCTTTGGAAAGGTTCAGGCCCTGTCCTAATGAGATCATTGTCAATGGATG
CAGGCTTTTATGCCGTTTGCTATCCAAGTGCAGTGTTCTTCAGAAAGTACCTCGGTTTAG
ATGCAGGCACCTCTTTAGTAGCTGCATGTATTGTAACAGGATTTGTCTCATCAGCTTGTG
GTTTGCCGTTTGACTATATCAAGACTCAGATTCAGAAAATGCAACCTGATGCTGGGGGCA
AATATCCATACACTGGCTCACTTGATTGTGCTGTCAAAACCTTGAAATCAGGAGG
>comp292_c0_seq1 len=433 path=[299:0-393 283:394-432]
CATTAATATTTCCCTTTTTGGGGATAAAAGAATAAACCCAAGTTAAATGTTATATCAAAA
CTTAGCCTTGAAATTGCGTTAAGTTTCAAAGGACATTAACCCCATCCCAGTCAAATGACA
AAAGATTAAAAATAATTAAACAATGCTTTTAGCAAACGACTTTTATTTCCTTCAACATTT
CTCCTTGAAAAAATTCTTGTTCGCTTTAGAGCAATCAGTAATTTGTTAATCTCCAATAGG
AGAAAGCTTTTGAATAGGAATATGAACCCAAATACACATTATTCTTGGAAAACACAAGCA
TTATCTATAGCCAATATCTCCTACAAAAGTTTATTGTACGCATTTGTCCATTCTAAGGCC
ATCCAACAGAAAAAAATTATCAGGCAACAGAAAATCCCAGTTATACTTACTCAATGCAGC
ATCCTGATCAACA
>comp293_c0_seq1 len=549 path=[550:0-362 913:363-548]
GGCTTGATAGAGTGAACATACATAAAAGGAAATAAAAACAATCCCACTTGATCACAAACA
CAATTAGTCACTTATATCCAAGTATATAGTTGAATTATTAGTCAAAAATTAAAAAAAAAC
AAAAGAAAAAACAGGACAACAATGAAGTTCATCAACAACAAGAGCGCCGTCTTGGCCGTC
GCCATGACCTTGGCAGTAGTTTTGTCGGTGCAAGCCGCCCCACAGTCGGCCGTCGGCGTT
GTTGGCCGCGGAATCGGAAGCATCTTTAATGCCGCCGCTGGTGCCGTCGCCGGTGGAGCC
GCCGGAGCCCTAGGAGGCTCGGCCGCCGCTGCTGGTGCCGCCGGTGGAGCCGGAGGAGCC
GCTGCTGCTGGAGCTGCAGGTGGTTCGGGAGCCGCAGCTGCCGGTGCCGCCGGGGGTTCA
GGATCAGGAGCCGCTGCCGCGGGAGCCGCCGGTGGTGCTGGAGGCGCCGCTGCTGCTGGT
GCTGCCGGTGGAAGCCGTGGCGGAGCCGCCGCCGCTGGTGCCGCTGGAGGTTCAGGATCG
GGAGCTGCC
>comp294_c0_seq1 len=1465 path=[2203:0-741 761:742-1464]
AGGTTTAACACTTCCACATCACCGTCAGCATACACAATCTATTGAAAATTCATTACAAAC
ATAAAAGAACCATATTAACAAATACAAATATAACTGTCCAATTTATCCAACAGTTTACGC
TTTTCAAGTTGAGTAGTGTTACTCTCACACTTTTGTACACTCTCCTCACACTCAGTTATT
TAACACAAAAATTACTTTTTTGTTTTGTTTTGTAATCTCAATGCACAAATTTCAATGGTT
ACTTATGTTTTAAATAATTGTGTGTGATAAGAGTGTGAAAGAAAATGAGAATAGCATTTT
AACTTCGAGTCACTGGTAATTTATCACAGTACAGTAGGAGGAGCTATTAAATTCCAGCTC
CTCTATTAATCTAACTTAAAAAATAAGTCCTAAATTTGGGAAACCATCAAAAGGAAATAC
TATGCCAACTCCTCATGAGGAGTCACGGGAACATCTTAACGAGTAAAACATCCATGCTCT
TCATAGTTGAAGTCTTAAGCTAAATAGTACTTTGTATTATTTCAAAGCCCAAAGATGAAA
GATAAACCTTCATGGAGGATAAGTAAAATTGAAATTTAGAATGGTTTAAAATGCCACCAA
GATACTATCAATGTTACCTGTTTGTTAAACAAGGATCAGAATATGTTCTATCAGCACGTG
AGTAAGGTTTAAAGACTAAAACACATAATGCACTCCAAATAGGCTAGTCGCAATACATAA
ATCTTACATCTGCAAAGAAGACGCATGAACCAATCCTAGAGCTAAAGAAAACTTGAACAA
ATAAAATTTGATCAGCCACAGTCATCTAACCTTGTGCTTTCCTTTAACAGGTTCATAAGA
ATCAACAACACCTTCATAAAACCTGAAGAAAAGAGTTTTATATGTAATACATGCAAGGAC
AAAAAGGAATGAACCTGTACTTCAATGCCACAAATTACTGGGATAAAATCAAGCAAGCAA
CAGATATCTTTAAAGGAAAAAAACTTCTAGGCCTATCGAAGTCATGTATAGTAAATACTC
CAATTGCCTGGTTATGCATCTGCAATTGATGATTTGCATAATAGTTGGTCAATAATGGGA
ATGAACCTAAACACATATAAAATTTTCAGAGTAATGTTGAAAACTCCATTTAGCTCTAAA
GCTAAAGATATAACAACCAACCGATCCAAATTCTTTATCTAAACCACAAAGCATGTTTCT
TAATTCAAATGTTCTACTACTGCATCCTCCTTGTATGCATGATGCATCTATAATTCAGAA
GCCAATTAATTTTTATAGCATCATTTATTCTAAATATAAGCATTGTCCTAAACCCATAGT
TCATAAGCATGAACCTAGAGCATCATATGGCATAATGTAGCTCAGGCCTATACTATTCTA
GCTTAGAAAGTCGACTGACTTTTGTAGATGAAATTAAAGTTGATAACAAGAACAAATGCA
AATGAAGACCTCATTAATCTAGAAA
>comp295_c0_seq1 len=465 path=[1:0-464]
GAGCCGATGATGTTGATCCGCACGTGTGTCCTCGCTTGTCTCGTGGGCGCCGCCGCCTCC
GCTGTCTCCCTCGACGCAGACATGGCGGGAGCCTTGGACAACAGTGTAGACAGTGATTCG
TTGATCATCAGTATCAAGCAAATCCGTCCTAGGAAGAGACAGAGATTGGAGACGGAAACT
TTGCTTTCGGTGTCCACTCGCATCTCTGGCGCTTCTTTTAGCGTTAAGCTGGACCGAGGA
AATAAAAAAATTGTTTTTGAGACTCAGAAGGAAAAAAAGCACTTGGACGTGGAGTCGCTG
ACTGACACCCGAATGATCAACTCGCTCGTGCTGGTGCTGGATCAGAAGAAACCAGTGACT
GAAGTTCAAGTCTATCTAGACTGCATTTTGGAAGGGAAACTACATCTGGATTTCAACCTC
CTTCACTTGTTTAAGAAGGATCCCAAATTTATCGTGTTACGGGAG
>comp295_c1_seq1 len=347 path=[1209:0-346]
GGAATTAGACAGCGACACGAGCGTCCAAGAAATTCTGAAACGATTGAAATGTGATCCTCA
CGACCAGATGCTCGCCCAAAACACTGACGATGATGGAGAAGAAGACAACTTGCGAGCTCG
AGAATCTAGGGGGGACATTCCAATTTTCCACGACTGTGATGACAACCTTCTGGTTAAAAC
AATCAATAAACTGATTGGAGTCGTGAACCGTCTTCAAGAAGAACTAGAGGCGCAACGGAC
AGAGACGAACAATCTACGGCAACTTCTGGAGCAATGCGACATCTGCAAGCCAGGTGAGGG
CTACTAACTCACTCTTCAGAGGGCAAAAGGCGCAAACGTTCGTAAAG
>comp296_c0_seq1 len=315 path=[273:0-314]
CACAGAGCCAAACTGGCAATCCATAAAATCATAAATTCTAACTTTAGATTGTAATAAGAT
AAATGCAACTAGCAAAAAGGGAGAAGTAATCTAGAGTTTTAGTCACTGTGGGGTAAGTTA
TTCCTTTTTCTTCCCTTAGACAATAATTTAAACATGATGGAGATGGACAAAGGAGTGAAG
AGGATCATACAGTTTATACAGGCTTGTAGTGGTTTATTGCAAGCAATATTACCAGTGGCA
TATCTTTAATGCACAAAATATGTCAACCCAAGAGAAAGGAAAATAAAATGAAGCATGGGT
TCCCAGGAACTTCGG
>comp297_c0_seq2 len=620 path=[598:0-591 1190:592-619]
TTCGTATTGCATAACCAGTATTGGTAGGTTCTCTTCACCATTTCTTGCTTTAACAATCAC
AGCGGCAGGGGAAAAGCTATCATTGTTTTGCTGCTGTGATGAATTATAGGATCAAAAGTT
TTCATTGTATTTGCACAATTGGTGAGTCACAAAATATTGGAATATAGACATTCTCCGCTA
GTACTTGTAGAAGTTTAAAATGTTACTGACCTACATTCCGGTATCAATTTTTAGGTTTGG
TATATGTGACATTTTCTTCTTTGTACATATTGGGAAGGCTGTTTGAAGCCACATGCTACA
ACGAAACCTCAGTAGTCAAGTGAACCTTAGGTTATCTGCTACAAAACACAGAAATAATCT
CTCTTGGAGACTACTAGAAATTTAGAAGACTTAAACCCCAGAAGTTCAAATTTTGGAGCT
TATTTAGCACAAGAAGGCAAATAACTCTGCTAATAGATTGCAGTAATTGGCACGCATTAT
ATTTTGGTTGACAAGAATGAAGATAGTCATGAACTACATACAGCTTAGCAATCTTGCATG
AGGGATTAAGGATATATTCCTTGTCTAAAATACGCATTCACATCTACGAGTCATGCAGGG
GAAGCAATCGGAGAAGAAGA
>comp299_c0_seq1 len=334 path=[312:0-234 674:235-239 552:240-333]
TATTAGTCATGTGATATAATGTAGGTTATTTATTGCTATCGTTAAAGCCAATGAAAGTAG
GTGAAAATGTTATGAATATGGTGAATATTGATGTCAATATAATGAATATGATAAGGCGGA
TAAAGTAGATATGAACGTGATGAAAGCGATATATAAATGCTGACGGGGGTGATAGGTGGG
AATTGTTGATTATGGGAGGCACGTGCTGTTGAACACTGGTCTTGAGTATGCAAGTCTAAG
ACGGCTCAACTTATCTTCCGTTGTTACAGTGATTATTTTGATTTGTTTTTTTTTTTAAGA
TTAAAATGTAAGAAACTCTTTTAATTATAAGGGG
>comp300_c0_seq1 len=544 path=[593:0-543]
GTTAGCAACGTCAGGTCACCAGCTGCTCTCAGCTCTCTTAACCAGACTCTGTTCGGCGTT
GAAGGAGTTCTCGTTCAGACACTCAGAAACCCATTGGGGATTGAATTTGAGGTTGTTACC
GCTAGGGGCGGTACGTGCATAGGGTCTGCTCAAACGTGGCAAACTGAACACACCTGGTTT
CCTGGCCACGCTTGGAAGGCTTGCACGTGCTCCAGGTGTTCTCGGCAGATCGGCTGGGTA
TTCGAACCTTTGCAAACTGCTGAAGCTGTGAGAGCCTTCGCATCACCCAACGGATTCTAC
GCGTTCATCTTGGATAACGTCATCAGCGAAGCTTATGCTGATTCGTTGCTGATATCTCCG
AAAATAACCTCGTATTCCTAGCGAACGTCTGGTATGGACACCACCGGGCTGACGGACGCC
CAAATCGACTTTTTGGCGCAGTGTGAGGCTGATTTTGCCAACAGGTACACGGACAAAGAT
GATGACTTTGCAATAGTGATGGCGATTGGGACATCTCGTCCACCCATCATGGAACCCTGG
CGGC
>comp300_c1_seq1 len=319 path=[297:0-318]
AGGGAGGTAACAGCTACCGCCCCGATCGCTCAGAGAAGGAACGGGCTCGGGACAGAGCAC
AAGGTAATCGCAGAAGATACGAAAAAGATGACGGATACGGAGACTACAAGCGAAGGAGGT
ATTGACGCAACCGCCCTTCCTCTTTCGTAATTCATTGAATTTATTTAGTATAGAATTGTC
ACTAAATATTATTGTCAATAATTTACCATGTTTTATAATGATTGTTTCCTGTTCCCATCT
AAATTGGGTTCCTGAAAAGGGTTGAGCTCATTTGTAAACTGTTCAGTTTTCATTACCTTT
AGGGTTTACCGTGATCTGT
>comp303_c0_seq1 len=419 path=[397:0-418]
GTTTGCTATTTTCTTGGCTTAGTAAATTGTATAATTCAAAATAACTTCCAAATTATATGT
GCCAATAGAGTCCTGGCAACCTGTTTATATTATTTCTAGTGGAGTGATGCCTTTGCTGTT
AGGAATAGATTCTCAGATACAAATATGAATTGAAAATGAGTTCTAGTTGTTGGCTTTAAA
GCTGAGGCTTTGTGAAGTTCTGTGAGATTCTTTTATTTCGGATACTTTAGTTTTTGTCAT
TCTTCAGATTTGGCAAGAGAAGTCATATGAAGTGTTTGAGATCTAAGCTTTTGCACTTGG
GAGTGTTATATGCCACTATCAAAAGTCTCCATTTTTGTGTTTTACTTCATACATCAGTAA
TCAGTTGATTGGATCTCGTCTTTGATGAACTCGGTTGTACGCTTTAGTTTTGGCTGCAG
>comp304_c0_seq1 len=1346 path=[1324:0-1345]
CATGACTGAATCAGACATGCCAACATTTGATGATATAAAGGAAATTACCATTCGGAGGTC
AAAACTTGTAAAATGGTTGAATGAACCATTTTTTGAGGAGTTAATTGTTGGTTGTTTTGT
GAGAATTGGGATTGGAAGGTCGGACAGTGGACCTGTCTACAGGCTCTGCATGGTCCAGAG
TGTTGATGGCCGTGACCCAGATAGACATTACAAGGTAGAGAAGAGAGTCACTCATAAGTA
TCTGATTTGTGTCTGGGGAAGTGAAAACTCCGCTAAAAGGTTTCAGGTGACTGTAGTTTC
AGATTCTGTTCCACTAGAGAAAGAGTTCAGACAGTGGCTTAGAGAAGTTGAGAGAACTTG
CAGCCAGATGCCTAGCAAACGGAATGTATTGGAAAAGAGGGAGGCCATAAGAAGAACCAA
CAGATACATTTATTCGGCAGCCACTGTGAAGCAGATGCTAGAGGAGAAAAAATATGCCCC
ATCTAGGCCACTAAACATTGCAGTAGAGAAGGATCGTTTAAAGAGGCAGTTGGAAATAGC
GAAAAGTAAGCCTGATGAGGCAGAGATGGATAGGATCTACGCAAAGTTGCAGGAATTGGA
AGCATCCCGTCAAGCCCGGGAGAGTGATGCCAAGGCTATCAGGCTGGCTGAGATGAACAG
GAAGAACAGGGTTGAAAATTTCAAAAACTTGTCTGAGCATAAACAGATGAATGCAAATTT
AAAAGCCGGAGAGGAGGGGTATGATCCCTTTTCAAGAAGGTGGACAAGGTCGAGGAATTA
CTATAAGGCAGAGCCGGGGACAGAGAATGAAGATAAAGAAGGTGAAGGGAATGAAGCTAA
AGGAAAAATGGATGAAACCGCAGGTGAAGATAGTAGAGGGGAAGAAGAAGAAGTACCTGT
CACAACAAAGGTTGGCCTTGAAACCACAGAAGCGGCATTGCAAGCTGCTGCTAATGCAGG
GAAGTTGGTTGATACCACTGCTCCTCTGGATCAAGGAACTGAATCAAATATGCTGCATGA
TTTTGACTTGCCAATTTCATTGGCTGCACTTAAGAAATTTGGTGGACCACAGGGACTAAG
AAATGGGTTTTTGGCAAGGAAACAAAAAATAGAAGCAACAGTGGGGTGCCGGGTCCCTGA
GAACGACGGGAGTAGGCATGCTCTGACATTAACGATCAGTGACTACAAGAGAAGAAGAGG
GCTTCTGTAAAATGTGGAATTTTGAGAATTTCAGTCTAATCCTTGTGGCGTTTAGACATA
TTTTTTTATCTCGTCTCCTATATCACTTTCCTAAGGTATAAGGCAATATTGTCAGCTGAA
TAAAGTAAACAGGCGTTAAGAATAAG
>comp304_c1_seq1 len=455 path=[2647:0-454]
GTCTGATTCAGTCATGTTCTTATCATCATCGCTGTCAGCTAATCCACCATCGTCGGAGGA
TTCTCTTTCACTATCAGACCTGATAACACTCTCACTCTGGCTGGAGCAACTTGGACTTGC
TGTAATTCCGGATTTTGGCTTCACTGGTGAAAGTCCCTTGCTAGTTGAGCTTGTTCTTGA
TGCATTGCCCAATTTACCATGAGTGTCTAGGATCTGCTGCTTCATCCTTTTTGCGCGCAA
TTCACTTAGGACATCTCCCTTGGCAGCTGTCCTCTCAGCATGTCTAGCTGATGAACGAAC
CTTGGCAGATGATGGAAGAGGTGGAGTTTTTGTTCTTGATTGGTTTGTCTTTGCAATTGC
ATTGTTGTCCCTCTTCATTCTCAATTTCTCTTTCAACTCCTTTTCACTTTTCTTAGTTGC
TCGATCAGACAAAATCATCTCCCTTTCAAGTTCAG
>comp305_c0_seq1 len=305 path=[1:0-304]
ACTGCAAATCCATATTTTGGTACCTTTACTTTGGATATTTGTAAGTGCTAATATCACATG
CAGGCTTTGCTGACAAAGTGAACAATGCAAGAAGAGTGAGGGCCTTTAAGCAGTATATAG
TTGGTTGAAGCAGTGAAGCAACGGTTGCTGATGGACTTGACAAACAGAAAGCAGTAATTC
GATATCTAGGGGGTTTTGATCTCACCCAAGAGGTTTTTCTTTTCCTTTCCTTTTTCAGTC
ACAATTTCTTTTTCTTAATATTTTGTATAAATGGATACATAGTAATCATGGGTAGTTGAT
TAGAG
>comp305_c1_seq1 len=391 path=[933:0-390]
ATTTTTCCCCCCCCCCCCTCCTTGTTGGCCCCCTTGGAGAAATCTCATGGGTGAAAAGTT
CCTGCAGCTCAATCAAATCAACAATGCCTGCACGCTGCATTTTGAGCAAGGTTTATCCAA
TAAACCTCAATTTCTGCTAAATCTTCTCCACTTCACAGCTTCAAGGCTTATAGAAAGAGA
AGGTCTTCAGTGGGAAAAAGACCACCTTACAGGGACCCAAAGGCAGCTCCAATTCTTTCA
CACTCCTCTGTGAGTCCCAATGCACCATCCTGCCATTTAACTGCGCCCCATGTGAACTAG
TTTCCTCTTGCTTTTTTTTTTTTATTATTTTGTTTTTAGGTGATTCGAAGTTGTAGTATT
GATGTTTCCTTACTGCAAATCCATATTTTGG
>comp306_c0_seq1 len=916 path=[1:0-358 360:359-915]
CTATATGGCCTAGAAAAATATTGGTAAAACTGATTTACTCTTGATTCTTATTATTTTACT
ACACATTTGTATTTTGCAATTTTCTTCAATCCGTTTCCTGATTTCATGTGAGATTTATTT
AGGTATTGTCATAGTGAAAGAAGAATATAATATTGATTCATTAGAGGCTAGTGAATGGCC
AAAAGAAAAAAAAAAATAGAGGCTAGTGCATAACCAAAGTTGTTTGGTGGAAAGAAAATT
TGTCAATTTCTCTATGAAATCTGATTGTACAGCCATACCATAATAGTTAATTTTGATATT
TTTCTGGTTTATCACACTTGTACTGCTGCATAACAATCTTTTTAACATTGGAATTCTGAC
CACATTATTGAACTGCGATCAAGCATTTGTTTATTCTTGAGGGTGAGTTTGCCTTGGAAC
AATGCAAACAACAGTTCTAAATGTAAAAAAAATGATACATGTTGCAGCACGAGGTTAACT
TTGCTTAGCTAATCCAAAATAGATCACCTTATTGGAAATTTATGGTAGTTTTCCTGTACT
GGTATCAGTGGTATCTTTTAATTTTGATTGGAAGTTTTGGATTTGGACCACACTCCCAAT
GCTACCGTGTTCTGAATTTCATATAAGAGGCTAGAATCCGACCTTTATTCATATTAGTAT
GCCATTGATGCTAAAAGCACTAGTTCTCTTTTATCCAAAAAATAAAAAGAATAAACATAA
GCTCTCTTGTCCTCATCATTTGTAAGGAACTACAGGAAACTTAACTGTCTTTCCCACTTC
AGTTAGATTTTATTAAAGAGAAAAAGTTCTAGTTTCTCAGATTGTTTGGGCTTAACTTTA
CATTATCATTCCTCTTATGACTGCTGCTTTGTTCATATTTATGGCATTGGCAGGGCGTTT
CACCACTATCGCAAGG
>comp312_c0_seq1 len=328 path=[143:0-140 495:141-327]
ACTCCACCGGGTTTTACCAATTTCAAAATTGGGATACTCGAGTTATCATCTAAGCATACA
ACAAGCCTTGATCCACTTCGTGATTATCAAACATTATGTCAAGTTCTTATTCACTTCTTC
ATTTACTGTATTTAGTATTTACTGAAATGAAAATATTGACACTCGGTCATTCATGAAAAG
TTGAAAACTGATATTCAAAACCAAACTGACTTTCATGATGAGTAAAGCACAGCCAAAACT
GATTTTCTAAACCTAATTTGGAGTCATAAATTCACATTCATCACCAGAACTTCTGAAAAA
TTTATAATACCATTTAAGAAGTTCTATG
>comp314_c0_seq1 len=534 path=[342:0-310 653:311-334 755:335-533]
GGCTCCTCCTAAACCCTAACAAGTTCTTGTTTTTGAAACTGTCATGTTCTCCAAAGCTGT
CAAATGCCTCACTAGAACCTGTGTCCATATCACAGATCCCTACTTATATATATGTTAATA
ACTTCATGTTCTTGTACATGTTGCTGGTGAAGTCTTTGTTTCAAGGCATTTGTAAATTTG
GAACTTTTTGCTGCAAATGAAAACTCTTATAGAATCCTGTTTTTCATGTTGCCAACTGAC
ATACTAGTTTAGTCCAGAATTCTAGGGTAAAGATATAGAAGTATGCTCTGCCATCAGTAT
CTGGATAGACCATTAAAATCCTGGAACTGTTGACCTTGTGAAGAATTGATGATTCTGTCA
CCAGTTCCAATTTTAAAACATGTATTTTCATATACACCCTTGATGTTATCTGGTGGTATC
ATTCCATATTGTTTTAATCATTTTAATTATTTGGATTTTCTATTTTAAGATTAAGGGAAG
GGAAGTAAGGATCAAAATCTAGATAATTCGGTCAAAGTTGCTATGGTAATTCGG
>comp315_c0_seq1 len=763 path=[1:0-762]
GGTGCGGCCTATGAGCTTGCTGCTGTAGTGGCTGTAGAAGAAACACCCATAGTCCACATG
TGTCCTGAGTTACCTTGTTGCGCCGATCGTGTGTATTGGCTCGATCTTGTGGTGATTTGT
GGAAGAAGTTCTACAACTCCATGTGCTTTTGTTCATGTAACTTCGCAAGGACCACTGCCT
GCGAATAGGTAACCGGTTGAGCTAAACACAACTCACACCGTAGATGTGGTGTTAAACCTG
TGATGTAAAACGACACGAGCCAAGTTTCAGGCATCCCGTGCACCTTGGTTGAGAGTGCTT
TGAATCGGCCCTGATATTCGGCAACTGAGGACATTTGTTTAATCTCCTTCAGTGCTGCCT
TCGGATCCGTGAAGATGTCCACGCCAAAACGTTCTTCTAGCGAAGTCAAGAAAGCATCCC
AGTGGAGGAATCCTGAGTTCCTTGTCATCCACTTGTACCAGCTATAAGCTGGATCGGTTA
GCGCCATGGATGCCATGGAAATACGATGCTCCGGGGGAGTCTGGTGGAATGTAAACAACT
CCTGGACCTTAAGGACCCAATCGTCCATGCCGTTGCCATCAAAGGAAGGCACATTGAGCT
TCCAATGGAGGTGGCTCTGACCGTGCCACGCCTTTATGTTGTTCTGCGAGCCATGCGAGT
AAGCACCGTGATGATCCGGATCTTCATGATCACCTGAAAGTCGTGACAGTAAATGGTCTA
ACTTGTCTTTGATCGTCGTGAAACGCGCTTCTGATTGGTGTTG
>comp318_c0_seq1 len=544 path=[1:0-543]
GCTTGATAGTATATGCTTATACTAGTCCTTCTTATACGATGCATTAAACTCAGCCTTACT
TTATGACAACTCCATTGATATTAGGCTTCAAAAACTTACAAAACTGGATAGTTCCCCTCA
CCCCTCCTTGAAAGTTCCCCGAGAATCAGGCTGGCATTCTTATACCCCTTTGCTCTTAAG
GATTTAATTGAAGTGCCTTTACAATGTCTAATAGTTTATGGGTTAACAGTCTTAAACAGT
TGCTTTGAACTACTTTTTGGTGAATATGGAGTCAGATTCCTGTTGATAAAATAATAAAAG
GGTAAATAATAGATGGTGTCTGTGCAAGTTATTGATGGCTTAGCTTGTGAAGGTTATGTG
GTTGGTCTTATGTGATTTACTTGTGGTCTTGCATGGTTATCCAAGCAAATCTAGGTCGAC
TGATGCATTTATTTTCTTCTTCAGCCTTTCATGAGCTGTAATGGATTTCTTTATTGTCAT
CTTATGTGGTACTTTCTCTCCTGTCTTCTCTTTGCTGTTGTAGTTTATCCGTGAGTACAC
TGGC
>comp319_c0_seq1 len=441 path=[1:0-440]
GATTGGCAACCAAATCCAATTCCCCCATCTTGCAAAACAACTTCTTTGCCAGTTGAACAT
CACCACTCTTGCAACAGCCATCAATCAATGTAGTGTATATGACAACATTTGGAGACAAAC
CCATCTCCACCAACTGAGCCAAAAGCTGAAAACCTTTAATCAAGTCACCAGCTTCACAAC
AACCCTTGATCATAATCCCAAAACTGTAAACATCTAGAACTATCTTACTCTTCATTTCAT
TGAAAACCCACCAAGCTTTACCAAAACAATTTGATCTAATAAGTAAACTCAAAAGATTAT
TGAATGTGTTTGATCTAGGAAAATGGCCATTGCCAATCATCTGATGAAAGAAATGGAGGG
CTTGATGAGGTAATTGAGAATGGACATGGGCATTAACAATTGCTTCATAAAGAAGAGTAT
AGGTTGAATTAGAAGTGAAAT
>comp322_c0_seq1 len=317 path=[461:0-316]
CACACATCAATCAATCTTCAGCTTAATCAGAGTTTCAGAAGCATTTACATTGTACAGAAC
TTCAAAATGCAAGGTTTTCAGAATTACAATGAAAGAGATTATTCTGAGACTGAATTATCA
TTGGATATGGCTGGATTGCTTAAGTGACTATGCATCCAATGCACAGCTCGAGCATAATTC
ATTGTTCTTCCATGCCTAAAGAAAACTTCATATTGGGCAAGCAACTATTTCAATTATGTG
ACATAATTTACTGGGAAAATGGGAAAGAAAACATGTCATCAAAGATCAAACAAGTTTGAA
CTCGAAACCAAAGACAG
>comp323_c0_seq2 len=472 path=[881:0-146 139:147-471]
GGCCTTGCATTATACTGAATATAGGTATTATAATTTTAGCATACCTTTGTGATTTAGAAA
TAAACAGTTTTGTTCACTTTGGCTTCTTTCGGTCCTCACTTTCACCTTTCAGATTGAGGC
ATATAGGTATACTTGAAGTAGTGGGGGGAGAATATATGTCTTATTCACTTTCTTTTATAA
ATTGACTATTAGATGCAGGAATTTCTTTGTGATGGTTAATGAAGAATTGAAGATCTTCCC
TTTTCACTCCCCTGTTTGTTTTCCCTTTGCTTAAATCTTGAATCCAAATCCAGTTATCTT
ATAACTTAATTTTAAAGGCTCTGTGCTTTTCTTTCTCCACTTTGAAGCACATGGATTCCC
CCTCCCCTTCCCCCTCCTTTCTGACTAAACAAAAATAGTAACTCATTATCAGAATTTCTG
ACTATGAATACATTCCATTTGCCTGCTGCTATATTGACTTTTCTTTTGCTCT
>comp324_c0_seq1 len=485 path=[463:0-484]
GACTATACTAGATAGCCAGAAGCACAAAACCGGACCTAATTATTATCTTGGAAACTGGCT
TCCCAAGACCATCAAACAAAGTAACTTACGTATAATTAGCTTGGCATTTTCACTATCATA
CTGCTTAAATGAACATATTCTAGGAAGATATGCATGAATCCAAAAATTAAAATTTATAGA
TGGATAACTAAATTTTATCCGATGACACAATAAAGACCAAAGCCCTCAATGTATAGGCAT
GGAAATCATAAATCTTGTATGCACTGGCTTGAGATGTTTCAAGTTAGAAATAAATGCAAA
CCTAAAAGTAATACTGGCCTCATCACAGTCAGATGGCAGCCAAAGGCATTTAACATATAG
TACTGGCTCAGTCATCAACCAGTCAATCAGGTGTAAGGCATAAGCTCAGAGATTGGAATC
ATCAGTCTAACTACTGGGTCTTGCTGGTCTAATTGAATGTCTTTATACAATATTTAAATG
CAATA
>comp324_c1_seq1 len=475 path=[1377:0-474]
AAAATTTATTAATTTTCCTGGTGACTAAATTATACTAATTGTGACCAATAAAGGATGTCA
AGGTACTCGTTAGTGCTGAACTCCAATATCATATATATATTGATTAAAATACGTAGAAAA
TGTTATACTCTTGTGCAACTAAAACTCAGGTAAGAATATCTTTTCAAATAAAGTACATGA
ATGAGAAATAAAATTGACAAATCTAATAATATGTATATATTTAGAAGGATATTGATATGT
GATCTTATCCTAAAATATTGGCATATGTACTAGGAGCAAGCTGTAGCGAACAAACATATT
GCCAATACAGAAAAAGAGTTTAGTCCAGACATTTTATCTATAATTAGTAAACAAATTTTC
ATTATTCTTTACTTTAATTCATATTTTCCGAGCATTGTAAATATAGAGATATAAAATTTA
GCTACCAATATTTATATAGAGACTGTTTATCGTATTGCATTTAAATATTGTATAA
>comp325_c0_seq1 len=383 path=[1:0-205 633:206-382]
AAGAAAATTATTCTTCAACTGATCAACTTGTCAATTCTTAAAGTAGAAGCTCTTTGAAAT
GCTGGCAAGTGAGTCCAGACAGATGATCCATCCCAGAGTAAGAAAAAAAAACCCGGCACC
TGAAAGTACCTTGTCGGAAGGTGTTATATGTGATGGACAATCAGTTTAGGTAAAACTCAT
CAACTGATAGCCTGATTTCATGCAATAATCTTTCTCTTGCACTTCTCATATACCCGGAAG
GGCTGTCTCACAAAGCACAGAAGCAATACCAAATGAAAAAATATTCCTTTTAAATTTGTG
ATGAACTGACAGTGACACAAGAAACTACTGCATTCAAACAAGTTTAGGCATCAGCTATCA
TCCCCCACCCTAAGAAGAAAGTA
>comp326_c0_seq2 len=687 path=[665:0-69 735:70-686]
GCCTCAATGACTGTGTTTTTTGTTTTCATGCCCGTGTTTATATGCACAACCATGTTTAAG
TGTAGACATAAAAAAAAATCCATTTATGACTCAACACAGACATAATGGAAACTAACACTA
CAGTGATCAGACTCCATATGACAATTCAGATTTGGTTAGGAAGCAATTTATAGGATATAG
AATCAGTCATATAGCCTTGTGTATCCCGCATTGCCTATGAACAGAAGCAGAACAAAATGA
AGATATGGATACACAAGAAACAACTTCAGAAACATGCAACCAGGGGCATGGTTAAATGGT
GCAGTAGAGTGCATAGCTGAAGCAAGAAAGTAGACTTTGCTTACTACCAAAAATAAATAA
ATAAATAACAAGAGCCAGCGAGTGCAGCAGAGAAAAAGAAAACTAACCTTCCATACTACA
TGTTCAGCTAAAAGTTTCCAATTCAAAACATGAGCATAACAACATGAACAAGAAAATGCA
TTACTGACAAGCTTCCTACCAATGCAATGACACAGACTGTGCAATCTGGTGAATGGTAGA
ACAAGCTAAAAGCTTCATCATTATGACAGTTCAAATGCCCAACAGAATATTGCAAAGTAA
TATCAGGTGAATATTTAGTGACAACTAATATGGGAAATTCTTAACTAGAGACTGAAACAC
TCACCGTAATTTCAACCATGACGTGCA
>comp328_c0_seq1 len=459 path=[1:0-210 866:211-376 363:377-458]
AACGAGGTTTCTGCAAAGCAAGCAGTTCTTGTCAGTTCAAGACCCTCGTGTGTCCATCCG
AGTGCACAAAGAGGAAGCCCAAGAAGAATAAGAAGCAGAAGGGATGTTTCCTGGACTGCA
GCAGCAAATGCGAAGCCACTTGCAAGTTTAGAAGAGCAAAATGTGATGGGTATGGTTCTA
TCTGTTATGATCCTCGCTTTGTTGGTGGTGACGGTGTGATGTTCTACTTCCACGGTGCCA
AAGGAGGAAACTTTGCCATCGTTTCTGATGATAAATTCCAAATTAATGCCCACTTCATTG
GAACTCGACCACAAGGAAGGACACGTGACTTTACATGGGTCCAATCTCTTGCTGTCATGT
TTGACGGACACACTCTAGTTATCGCAGCCAACAGAGTATCTCAATGGGATGACAATGTCG
ACTCTCTTATAGTGAAGTGGGATGGTGAAGTAGTCATCA
>comp329_c0_seq1 len=466 path=[1:0-465]
TGAGAACGAATCTTAATAATTGACTGCTGGTGGAAGTTGAGACAATAAGGAAATTAAAGT
ACTAACTGCAACACTTCTGCATTATATCTAATCTTGTTGCATAATTTCATTTGTCCTGAA
CATTTGCTTTAACTTTAGATAGAGAACAGTGACTACATCAAACCACAACAATTGAACACA
AACAATCATTTTTTTTTTAAATAATAATGGCCATTATCTACTGTAATGATGGACAAGTAA
AAGTAGGCATAAATGAAAGTCGAATAGCTACTTCACTGAAAGGTATTAATACCAACAGTA
CCTTACAAGCACAACACGTTGACAAGATAGTAAATGGCACTTATGGGTTCAATTAAAATG
AAAAGCTTGCTTAATATCCCCAAGACAAACCACACGTTTGATAAACTATTGGTATTAACA
CTTGAACTGAACACATTTCAACTTTTTGTTTTCCTCTAACTATTTA
>comp330_c0_seq1 len=823 path=[1:0-822]
CTAGCCTTCACAATGTTGGTAGCGAAGGCTTTACTACTGGTTCCTTGTCTTCTGGCTGTA
GCCAGCAGCCACCCAACATCTGACGCTAACGACGACCTGTGGGAATCATTCAAAAGGGAT
CACAATAAACAGTACGACACACCTGAGATCGAAGCAACTCGGAGGGCGATATTTTTCGAC
AATAAGAGAAAAATTGATGAACACAACGTCCTTTATGAAAGAGGAGAAATAAGCTTCAAA
CTCGGAATCAACCCACTAGCTGATGTTACTCTGGATGAAATCCCGAACAAAGGTATCAAA
CCACGTGATGAGCCTTTCACACTTTTCTCGGTCTCCCAAGGTGGACCAATACAGTTCGAG
GCCACAGGTGCTAAGCTGCCTGAAACTGTTGATTGGAGGGAAAAGGGGATACTGTCCCCG
ATAAAAGCACAATACAACTGCTTGGCTTGTTGGGCATTTGCTGCGACTGATGCGATTGAG
AGCCAATACGCCTTGAAATACGGCAAACACCTTCTCTTGAGTCAGCAGCAGTTGGTAGAT
TGTTCCCAGGATGAGGGTAATCTCGGTTGCCAAGGAGGTATGGTCGATTGGGCTTACAAA
TACGTCATGAGGGTTGGAGGTCTGGAACAGGATTCTGACTATCCTTACCAAATAGAGGAT
GACAAATGCACCTTCAACGCGTCAAAAATCGCTGCCTCAATCACCAACTATGGTGAGATC
AAGAATGGAAGCGAAGTTTCTCTTCAGGAAGCTGTTGCCTTTTACGGACCCGTCTCCGTC
TGCATTGACTCGAGCAGTTTCCAATGGAACTACTACACTGAGG
>comp330_c1_seq1 len=408 path=[1986:0-407]
TTTTATTGGAACAGTATTGACACTTACATACAAATAAATTATTTTAAATTCATCTCAGAC
AAGTTATTTTTTATTTGAGTGCTGTTCAGTTTTTACTATTCGACGGTCGATCAGTTGCAG
AAGGGTTTTGCTTTAGGGTACCTTGCTTAGGCATTAGTTGGGGGAGAGAATGGTTTCCAA
TCTCCTACGATGGGGAAGTTGCCGTAGCTTGCAATGGCGCACTGATTGCCCTTGTTTCGG
GCCATTTTGATGAAGCCTTTTTGTCCAAAAGTCTCCCCGTACGAATTTTTCACCAACCAG
TAATCGGTGCCGTTTTCGGTTCCGTATCCAACCACTACAACAGCGTGATCGACGTCAGTC
GTGCAGTAAGGGTAGTCAAAAATACCCTCAGTGTAGTAGTTCCATTGG
>comp331_c0_seq1 len=505 path=[1:0-504]
AAAAACAAACAGCTTAAGATCAGGCCTTACAGTAAAGTTAATTATCATTTCATATCTCTT
GGGCTTAAAGCATCTTATTTTTGCATCATCATATATGTACGAGTGATGAGTGATTCCGTC
CACTAACAGCCACAGCACCTACTAGATAAGTTAGGTGTTCTATCTTCAAGTTATACTGCT
TCTTAGACTTCTCAAATAGACAGTTAGCTAGTTGAATTTCTTTGTAGGAATGAGATAGCG
TGGACTTGAAGTTAGTAGTCAGTTTCTAGCCTCCTGGAAAAACTCAATAATTTTTCTTGT
TTCCAGTATGTGTTGGTGATGTACTTGCTACTTAGGTTTGTTTTAAAGGTGAAAAAGTAC
TTTTCCCTGCATGTAAATAGGCACATCCTTTATAGACTTCTGCACAGAGCTGCAGGCTTT
CTATGGAGATTTAATGTAATACATAGCACCTTTCTGGATTGTACAAATGTGGGGATGAAC
TTTTTCCAATTTGATTTTATGAATT
>comp331_c1_seq1 len=782 path=[965:0-781]
GGAAGCATACAGCAGCCATTTCTGGTATGATCTTCCCTTCAAGAGAAAAGAAGAAAAAGA
ACAGTGATTGAGTAATTTTTTCTTGTGAAATTATTGTAAAGGCAGGCATATTATTAAGTT
AATTTACCAACGGACATTGACTCAAATGATAAGGGAGTTTGCTACTCACCTTGCTATCTC
AAGCTCGAATGGATGTGGGAAGTAAAAATCCCTTGAATTCACTAGGCCTAACATAGAAAA
GCGTATTTAGACCGGCTTGGGGAGGGGACTACTGGGTGAAGCCTAGGAACCCCTTGCTGT
AATACAAAAAAAAAAGTTAATTTACAAGAATAATAAAGGACCTAGCAGATACTATGGGAA
TTAGTAAAACAAGCATGTCATTTGTAGTTAATTTGTCTAGTTAGAATCTTTCTGAAAGGA
ATTTGATGTGTTTAAAAGAATTTTGAGGCAAATAAATGGAAGAATACATTATTATCTTGC
AAGAAAAAAATTATGGACCGATTTTGAAGGCTAAGACTTGGAACCACTCATGGCAAGGTA
TGAAAGGGTGGAATACACTGAAGAAAATAACTATCTAGGCATTAAACCTGTGAATTGGAG
ACGTGAAGCATATATGCTGGAGAACATAAAACACCTAAAACCCAAAGAAATTGAAGAGTA
CAGGTTTAAATCACATTACCAGATCCAAAGTATAATCACAGTCCACCTATAGTCCTCTGG
GAAACTAGGATTCCTGAAGTGCCCCTAAAATTTGAAAATTCTTGAAAAACAAACAGCCTA
AG
>comp332_c0_seq1 len=359 path=[337:0-358]
AGATGCTTCTTCATCATTTATTTATTGTTTTTTTTTTTATCAATAGATGCCATTCACATT
TCGAGGGATTATTTATGGGCGGAAAGTTTCAAACAAATTGCTGTTGATATTGTTCCTCGT
TCTATAACGTAAACATATTTCATGGATTCGTTTCTCTTTTTAATACAACATATGCTCATC
TTTCATAATGGGATAGCTTGGTGATTTCCTCATTTTGGAATTTGGATCACTCTCAGTCTC
AGGCTATCCTTTCCCTATGGCCTCTGAGATGAATTCAGGGGAAAAAGCATCTGAGTCATG
GCTGGATTTAGATTCTGCTCTGATTTAGGTAGTTTGCAGAGGTTTAAATATTAAAAGGT
>comp336_c0_seq1 len=533 path=[1:0-532]
GTAAGGTGTGTCTGTCAAGATGGATATGTTGGTGATGGGTTTGCTCATGGAGCAGGATGC
TTGCAGGCCTGTATAAAGGATGGACAGGAAGCATATGGAAGTGACTGCTACATCAAAAAA
CATGATCAAAGGAAAATTGTTATAATTGCCGGAATCCTTGGTCCAATTCTTATTGTTGCC
TCCTTGGTTTCGCTATTTTATCTTCTTAAAAGACCGGTAAAACCAGGGATGTTTGACACT
GAGCAGGCTTACTATCACAACATTTCATTCCCCAAAGCTTGTAGAACTCGATTATTCAGC
CACCGTGAGCTAGAGGAAGCCACTAAAGGTTTTGAAGAGGGTCAGAAACTTATGCATTGC
AATAATGGGACAATTTTTGCTGGAGTTCTTGGGGATGGATCTCACATAGCTGTCCACAAG
TTACAATGTGAGAATGAGAAAGACTTAATTCAAGTCCTGTCACAAATTGAGGTTCTATCT
TCTATTGTACATAGGAACATGGCCCGCCTTCTTGGATGCTGTATTGAATCTGG
>comp336_c1_seq1 len=356 path=[1354:0-355]
ATTGAATCTGGCTACTCTCCTCTAGTGGTTTATGAGTATCCTGCAAATGGTACCCTGGAG
GAACATTTACATCAAAGCGAAGGACAAAAACTTGGTTTAGACTGGTATAGGAGATTGACT
ATTGTTGCAGAAACAGCTAGTATTCTGGCTTTCTTACATTATGAGAACTCTCCTCCCATA
TTTCACCATAACCTTAAATCTGGATGCATCTTCCTAGATGATGATTATTCTGTCAAGATT
GCAGGATTTGGGCTAATCAATTCCAATTTTAATTATGGTTCTCACTTCTATAAGAACCAT
GAAGGCTTGCGCCTCTGCAAAAATGATGTTTACGATATGGGTGTGGTGCTTCTTGA
>comp337_c0_seq1 len=454 path=[432:0-453]
GTTTTAGTGACAACTTAATATACTGTCACTAAAGCCTATTGTGACAGAACAAAAGTTGTG
GGTATAGCGAATCAAATCTTATGGGAGAAAGTGTATGTGGGTATAAGTTTTTGGATATAT
ACCGATGGTTTTTTACCCTTTTATGACGGAATTTTGCTGTCACTATAGGTCACATTTCTT
GTAATATTAATTATATTTTTATCTATTTATACCTGAGTATTTACAAGTGTTCTTCATTAG
TGAATATGTTTTGTTTAATTATATTTTTATTAGAATTGTTATTCTGCTTCATAGGGATTC
TAAGAAAATAGAGCCCTAAAACTATCTAGATGGGATGAGAATTGATTAAAATATTTAGTA
TAAGTTGGTAAAATATACAATGACATTTCTGTAATTATAGGATTATAACACTAGGGACAC
AATGATCATTTAGATTTTAGTAGTAGAATAGGAC
>comp338_c0_seq1 len=924 path=[902:0-923]
AATTTATTTTAGATCAACTAGGTAGGGGGCACAAGTATTCTATCCCTGTTTGGAATAGAG
ACTCAAAATATTTTCAGGATTCGAACTACCTATTATAAAACTCCCAGGTAGAAAGAATGG
AGGTTAATGAATAAATCAGGAAAATTGAATCAATGAAGAAGTTAATGATTCATTTATATT
TTTACCAACTTGAAAAAGTCCTGTTAGTATCATGAACAACCTTCATTATTAGCAAAAAGT
TGTTCACCATAAAAGCTGCAGGTTTTCGGAACAGGTACACAGCCAAACTGCCAATGTTGG
TATCGCAATAACTTTTTCGGTCTATCTTTTTTAATGTACGAGTATATCCAAAATTATCTG
GTGGATGGTTCAACGGGGATGCATCAACGCACCCCGGGCTCACAGAGTAGGTATACTACT
AAGTACTATTAATCATAATTATTATGTACACACACCATCACTCGAGTATCTCTTCCTAAT
GTCCCTTGATGAATTGTTGGAGGTGAGAGGTTTCCTATTCGACGGAGGAGCGGATGCTTT
GAGGTGTCGTGGGGAGGTCCGAGCAGGGAGCAGGAGTCCCTTCCTTCAGGGCGGACCTCA
CAAAAGCTCGGGTTTCCTGTTGGAGGGCCGTCAGCCGTTTTTGAAGTTGTTGGTTTCTCC
TCAGAAGGGCCATCGTCTTCATGCTTATCTCCACCAGTTCGTGTTTTCGTTCATCAGCGT
AGGAGTCAGGTGAGTAGGCATGGAGCGGTGAAGTAGAGGGAGGAAGCGACGGAGAGTCAC
CTTCTCGCTTTACATCATCGGCCACCAGCCCCATAGCAGTCCTCGCCTTAGAAGGGGTGA
GGTTGAGCTTGGAAGCGTTGGGTGTCAGTCTTGATGCCCCTCTCACACCATCCTCTTAAC
GCCTTAGGGGCAGTTCTGTCGGGG
>comp339_c0_seq1 len=345 path=[323:0-344]
ATTGAAGCCTTGCAGGAAGAAATTATCTTTTTAATACGCTCCCATACCCACATACTACAA
GAGAGAGAGAAGCAGGTTCCACAACTAGTGTTTTGGGGTCTGTGTGTGTTGGTGAAGTAA
CCTAGTAACAGGGAATAGGAAACTTGTCAAGAGGAAGCAGTAAGGTGGTTTTTGAAGTGG
AGTAGAAACAAAGGAATGCCCACTACCAGCTGGAAAAGAAAATAAATGTCATAAATGAGA
CACAACGTGTTTTCCCTGCATCAAGAACAGAGTTATATATTCCTTGTCAACAAGTCCTAA
ATGTACTTTTCCTTTGTGATATAGTACTCACAGTGATAATTGGCA
>comp340_c0_seq1 len=336 path=[314:0-335]
ATATTTAGCAGGAAAATCTATACTAGATTGACAACAAAAGATAGAAAAACTGCAGTGAAT
ACTCAAACTACTCAGGCTTGGACATGCGTAGTATGTAAAGAGACCAAATAGCATGGTGAA
AACCATAAACTGTAGTTTGATCTTCAAAAATGAGTAGAAAACAAGGCACTTGCCGCTTGA
AACACTTCCATGACTATAAGATTACACCATAAAACAGAGATAGATGTACATGCCAAACAA
CTCCAGCGATTTAATTATCACTGGTGCACCATCTTTTTCTTCCTTGACCAGATGGAACAG
CACCATAATATAAAATTTCTTCCTCAAGTATTCTTG
>comp342_c0_seq1 len=335 path=[287:0-244 220:245-334]
AGCTTCTTCAGTCTTTCTCCTCAGTCATATGCACATGACACCCTTTTTTGGTGTCATACT
TTTAAAATCTTCAGAAATTGATGGAAGTGTATTCTGACATAGGACACGTACTATTACCCT
AATGCAAGCATTCTCCACTCTACTTGTCAATAATTAAATAAAATCTTCGCCATAATTTGG
GTAGAAACTGCCTCTGCCTCTCCATGCGTGCATGTAGGAGTATAGGTCTTGAGAATACGT
GTGCCATGCAACATTTAAATCCATGAGATAAAGAAATTGGCTGTTAAACAAAATAATATT
GCATATGGAATATTATCTTCTTTTTATACTCTTTG
>comp343_c0_seq1 len=336 path=[1:0-335]
ACCTTAACCCAAAGCCTTCTTCAAATTTCTGAAATAGGGACTCAACCATCTAAAAATGAT
ATATTAGGCACAAACATCAAATTGAATAGTAAAGTAAGTAAATCAGTTTAGACATAATAG
AGCTAAATTACAGCGGCAGCCTCAAGCTAAATCTGGCCACAGCAACACAACCACATGCAA
TGACATAATCCTAGCCAAAAAAGATATATGAATCTAATGAAATAGTTGGCACATTCTAAA
CATTGCTGGAGCATTTAACAGGAAAACTGGGTCTATCACTAATTCCGTGCTGGCCAGTTT
AGTGCGCCCATCTCTGAACGTCCAACCATTTACGGA
>comp343_c1_seq1 len=377 path=[981:0-376]
TAGCCATTTTTTGGCAGCCAATTGAATTTGTATGACAACTCTCTTCTTAAACATATGTAC
ATGTAGAAGTATACAAGCTTCATTTCAATCCAATCTATCAGAGTCATATAATTCAACCAT
ATAAACAATATGAATATAGAACACATTTGAGCCAAAGAGTCATGTGATAGAAACATGCGG
GAGTAAAATGTTTAACTTGCAAGCTGCCATTCATTACATGGTCCACAAAAGTCCAAATGT
ATATAACAATTAGGGTAGATAATTAAGAAGGGGGTGGGGAGAGGCAAAACTATGCAGATG
ATATAAGAAAGTTCAACCCAGTACAACAATTAAGAGATAAAGGTGAATATCTGAAGATCA
AATGTCTAAAAACTAAG
>comp344_c0_seq1 len=334 path=[17:0-333]
TTGCTACCTGCAAGCCAAGAGAATGGTACCTGAGTTCATATCTAATATTTCTTCAATTAT
TGATGGACCAATCAACTACTCAAAATAGTGACTATCTTTAGAAAATGACAAGCAAGCAAA
AAGCAGCAGCTTCATTTAGGAAGAAAGCCAAAACTTGGAATAAATGGATTCATTAACACT
CCAATTTTATGAATAATTTCATAGAAGAAGATTCAGTGATCAGAGGTGAGCCTTCAACAG
ATTTCCCCAGCTCTACAAAGCTTAACCAGATTTGCCAGAAAAGCAGAAAAGGAACCAAAC
AAATGCCGACTCCTTGCTACTCATTGTATCTTTG
>comp344_c1_seq1 len=366 path=[655:0-365]
ATTCAGAAGTTCGCTGATTATGTAAGTATTCTGGTCATGGTTGTGTTTGACTATGTTGCA
CTTGGGCAACTTTTATGTTCTACTAGCGTTACCTTGTTGGCGTATGCTTTTTTGCATAGA
ATAAAATTGCATTCCCTTCTGTGGTAAAGAAAGTATTAGATCGTGAAACAGTTCTGAAGT
TAAGTGAAATGTTTCATATTTCGTGATGACCTGTACTTGACTACCACATAATTTCATTTT
TTTTAAATAATAATCCAATTCTTGTTATTTGTCAATCTGCATTGTTGTTAAGTTAGATTT
GCCCTGCTAAGACTTGATTTATATCATGGCTTTATATAGGGGGGATGATAATACTTGGTT
CGTGAT
>comp346_c0_seq1 len=438 path=[188:0-153 398:154-437]
GTATCCATCACTTGACATAGAGGTATCTCAGCCTATTTTCTAGCCTGTAACTTCTTTGCC
GTCGCATTAAATGCATATTTTCTTCATGATTGTAGACACAGCAAATTATTGAGATTTTTC
ACTTAATTGATTCTTGAACTTGTTAAATCTTTCATATTTTACACTTTGTTATGTTCTCAC
TACTTGTTTCAGGACTCTGGCAGCACCAGTGATCTTTTAGTTATTCCTTGTTGCCTCTGC
ATTTTTTAACTTATTTTTTATATATGTTTCTCACCAAAACTTTCCTTTCTACTTTCTTTC
TAAGTGATCAATTCTTGTATTCATGGTGATGATGAAATGCTTCTGTTTGCATACTCATGC
ACACTAGTGATAATATTCTGTTGCAGTGATCAAAAGATGCCCAATTTCAATTGCAGGTTG
ATGGTGGTTTAGGGCCTT
>comp347_c0_seq1 len=335 path=[731:0-334]
TCAAATATGCCTTTTTCGGTTTCTAAAATTGTCGACGCATAATGTCAAACCACAAAAATA
AAACTTATACATCATATATGTCTATCATGAGCTGAAACATAACAATGTGAGGGAAGCAAG
AGATTGACATAAAATTTGCAACCGAAGTCATGATCCATTCATATCAACTATCAACTACTA
AACTATGCAGCAGAAACATTTTGTATAAGCAGTTAGCCTATCACGTTTGACATTCCTCAT
TTGATCTAGTGAGTTAAAATATAAATCAAATAAAAGACTCACATTCCTTTAGTTTTTGAA
TCATAAATAGACATAGAGACTTGTCATATAGTATG
>comp349_c0_seq1 len=400 path=[1:0-399]
AATCTTGTTGGGAACTCACTTAAGGTTTGCTATGTTTCACGCTGCATCTTTTTGTTTGAC
CCATTTTATACTTCCCATATATTATGGTGCTAGAAACATCTCTTAATTTTACACAGTAAC
ATTTTCACCCTTGAAGCATACAAGGATATTGTTTGTAGATTTTGGCCTTCCCATTAGATG
TTTTCCACCTACCATATCAATTAATCCTTTCAGTCTTTGAGAACCTTGTCTTTTTGAAAA
TTGTGGGTCCCTTTGTTGATTGTTCTTGAGGCATCAAAGGAGAGTTAATAAGGAAATTCA
TCCATAATCCTGGTGTATTGTTTTTATTTACTGTTTCTTATATAATATCTCATTTTTTTT
ACTTTCACTAGTAACTAGTAAGTGACCCATGCGATGGGCA
>comp351_c0_seq1 len=399 path=[422:0-398]
GTTAACTTTTCTCAATAAATTTTTTCATACATAAAAATCGAATTTTTGACCTCTTATTTA
TCACTTATGTGTCAATAAAAACCTTAATTTTATGTCATGATAATTAATTAGCTCCACTAA
TTTAGCGGGCCGACAGCTGGTATTATTATTTTCGGTGAAATTAAATGATTGGTAATGGTA
CAGTGAAGCACAAATTTCCACGTCGGTGGGTCTGTAAGGAGACCATGAGATCCAATACTT
AAGGCACCAATGGTAATTTGCCAATGTGACCAGAACTACTATATTAATAGTCTTTTCTGA
GGCCTCATTATTTAAGTGTGTCAATTAACATTTTCAATAAATAAAAAAAAGAAAGGTGTT
TGAGACGTGTACGTACCATAACATTCCAAATGAGCTTCT
>comp354_c0_seq1 len=934 path=[1:0-566 1178:567-933]
TGAAGATATGTAAACTTGTTCAGCGGTATTACTGAAAATGTTGAAGCATGGGCGTGCTGG
AGTTCCAATGGAGGTGATGGGACTTATGCTGGGCGAGTTCGTTGATGACTACACCGTACG
AGTCATTGATGTCTTCGCGATGCCACAAACTGGAACTGGAGTGAGTGTTGAGGCAGTCGA
CCCGGTGTTCCAAGCCAAAATGTTGGACATGTTGAAGCAAACGGGCCGACCTGAAATGGT
GGTTGGCTGGTACCATTCGCATCCTGGATTCGGCTGCTGGTTATCTGGAGTGGACATCAA
TACCCAGCAGAGCTTCGAAGCTCTCTCTGAACGTGCAGTAGCTGTTGTCGTTGACCCTAT
TCAGAGTGTTAAAGGCAAAGTGGTTATCGATGCTTTCCGACTGATCAACCCTAACATGAT
GGTGCTTGGCCAGGAACCCAGGCAAACCACCTCTAACCTCGGCCATTTACAAAAACCATC
TGTTCAGGCCCTGATTCACGGACTCAACAGACACTATTACTCCATCAGTATCAACTACAG
GAAAAACGAGCTCGAACAGAAAATGTTGCTCAACCTGCATAAAAAAATCCTGGATGGACG
GTCTCATGCTCAGTGACTACGCAGAGAACTGCAAAATCAACGAAACCACCGTCAGCGATA
TGTTGGAGTTGGCCAAGAACTACAACAAGGCGTTGGAAGAAGAAGAGAAAATGACTCCTG
AGCAGCTGGCCATCAAGAATGTGGGGAAACAAGATCCCAAACGGCACCTCGAAGAGAAAG
TCGACGTCCTCATGTCCTCCAACATCGTGCAATGCCTCGGCGCCATGCTTGACACCGTCG
TTTTTAAATAAACAAAGTCTTTGTAAACTCCTATAAATCATATTGCTACTTTTCATTTGG
CATTTCTCGTATTTGTTCTGCGATTGTATTTAAG
>comp355_c0_seq1 len=762 path=[1282:0-761]
GCCCTCAATCAAGCTCCAATCAATTCCCTAGAGTCAATATCCAATTAATCGCCCTTGACT
TTGGGGTCAACACATCCTTACTTAAATTCATAGGATATTTCTTAATAGTTTTCTATGCTC
TTAACATTATTAGAGAAGAGTAGTAAAGCAGAGAATAAGATATCCTCGTAGAAGAAACCA
AGAAATACAAAAACCAGAGCAAACAAGAAAAGCCCATCAGGTAATAATAGCTCGCCAACC
TATATATATCCATTAAAGAAACCCCCTCTAACTCTAATGTAGTCATTAGACATTAGCTGA
GCATTACGAGCTAAGAAGACCACTTTATTATTTATTTCTCATGAAAGGTAACAGAAAAAA
CTTATCCTTTAAAATTCTAGCATTCTCTCCAAGTAAAAGAGGTTTTATTGAAGGGAATCT
GACAATATTATATTTTTGGCATACAAGTAGGACATAATATGGTGTTTTGGCAGTCTAATA
TTTTTTAATTTGTGGATGGCTTATTAAGGGCTTACTCTTGGACTAGCACAGCAGCTGTTG
CCCTATTGATTAATACTAGTGTCTAGTTTTCACCATACTCTCTGTTATTCTGTCCCTCCT
TTATCTTGAGACTCTTCATTTTTTTCCCTCCCTTTTCTGTTCCTCTGTTTGGTTCTATAT
TTCTAAGGTTTTTTACCCTTGTAAACTTAAATGGAAAAAAAATGTGCGGAAAGCTAGATG
GTGTGTTATCTATTATAGTGGATTTTTATCCTTATAAATGGT
>comp357_c0_seq1 len=566 path=[759:0-165 382:166-189 406:190-565]
GGCATCCTTGCAATAACAATGAGGTGATTTATTTTTCCTCTGTTCATCACTAATGATTTC
AATTGAAAATCTACTGTCAACCATCATAGTTACCAGCTGAAATACAAAATAAAACAACAG
GAAAATGGAGGGAGTTATACTTTTTACAATGAAGTTTATTATACAGTTATTTATTTATTT
ATTTATTGTGATTGAATCAAATACAACATAAAACAACAGAAAATGGAGGGAGTTATAACT
TTTGCTTTTCAAATAAGGGGAGTGGAAGGGAATGGGATCCAAATCACTCCTCCCTCCCTT
TCTTGGGCAGAAAAGGGGAGGTGTATTGAGGAAATTATTCTATTTACTTTCAGAACTTAA
GATGATTGATGAAACAAAGTGGATGTACATGCTCGTTATGTTTGTAATCATAATTAGCAA
TTATATGTGATGCATTTAAAGTAATTTTTCTAACCATTTTTTAACAAAATTGTGATTTTC
ATTTTGTTTCTTTGGTTTTGTTGTCTTGCTTGTTTCTCTGTCCCCTTCTGGGTTGCAAGT
GCAGGGTAATGATGGTGAAGATATAA
>comp360_c0_seq1 len=550 path=[183:0-549]
TAAACAATTGGAAAACATGGTTGGATTGATTAAAAATTCTACTGCAATTATAGATCACAA
ACTGAAAAAAAGTAGGCATGAGACATACACCAATCAGGATATATGAGCATGTATAACTAA
AGATACCAATAAGGAAACCCACAGGACACATAAGCAGACATATAGATGCAGATACATTGT
CTTTTGGAAGCATTCTTTGGAATGTAATTCTTCCAGGCAAGACTAAGTTTGATAGATCTG
CATGTTGTCATGGTCATGGATGGTAAACTTCTGCATATGCCATGATACATACATCCCCAT
CAAACATAGTCAGAATTGAGGGGCACTAAAAATACCAACAACCAAAAGTGCAGTTAACAC
CAAGAAAGAAAAGAATTTAGACATTCACACAGAAAGCAACCCATGTTATGTCATGGGATG
GCTCTTTTACTCCTCTGGTGTAAGTGGGAATTTTATTTCCACTTTGGTGCAACTTTAGTA
GTATTTCCCACTTTGGAGCATAATCTACAATGAGTCGTAGTCTCAAGTCACGACTTGCAC
CAAGTTGTGG
>comp362_c0_seq1 len=362 path=[340:0-361]
GCTATCCTCCATGGGCAGTATGTCATGTTTGCCTTTCAGAGGTAAGGCATCCGGTTTTTT
CAGTTGGAACAGATCCTTCATGCATTTTCTCAACGTTTCGCTGGTGCTACGGCCGTTGAA
AAATATAGACTGCTTGGTATTTTCAATCAATTTTGGCTCTCTCTCTTGAAGAACTTTCTT
TCCTTTGTGGGTAATTGGTTGCTTCACTCTTTGGATCCCCATAGTGAATCATCAACTTCT
TTACACAACACTCTCTTGAAGAGATGTAAGAAACCCAGGAAACACAAGATTTTATTTACG
AAAATAAGGCAAGATTTCGAAAAACTGTCACGAAACGAAAACAGGAGCACGCGGAGTTGT
TA
>comp364_c0_seq1 len=630 path=[1:0-629]
TTTTCCACTGCGCTCTAAGTCAGGAGCCAGGAAGGTGTACTGTTTCTGAAATTATGAAGA
GAGTCACATTGCTAAATGTGAAAGCTTTTATCTTTAGAAGTCATTAGGTTTAGCTAGTCA
TATATCTGCTATTCTCAATCCTAATCATATCTGTTGCTCTCTAGCTAACCTGCCTTAGAT
TCATTGCTTTCGTTGGAGTTGGAGTTGTCATCGAGTGAATAATCCCCAATTTGTTGTCAC
CTGATAGAAGAAGTGTCCCAGTATATGCAGTTGTGGTTGCCACAACTGTTAATATCAGCT
TCACCATCTTTATCACCACAATCATCATTGATTGTTTAACATAAAATTGTTATTTCATCG
GTGTAAATAAGTTTTTAGGATCATTGAAAGTTCTAAAACTCGATTGAACGGTTTGTAGAA
TCTTCTTTCCTACAAAGAATGCTGTCTTATTAACCATATACTTGAGTCAGGGGTTCAAGG
TTTCTAGGAAGTGGGAAATTGATACAGAAGACATCCAAGATTTCACAAACCATATGCCAC
TTTTATCTTACATTTTGAAAGAAAAATAAAAGGAAAGAAAGAAATCCTGACAGACTACTG
TAACAGGGTTTGAAGAGTTGTGTAGTAAGG
>comp364_c1_seq1 len=498 path=[1215:0-497]
TGTCCTCAAGGGGGATTATGTAATATGGAGAAAGAGGAGTTATTGCATTCAGATAATACA
GGCTAACATTTAATGAACTAATTCAACAACACTTGAGTTTGTATCAAAAAAGAAACATCC
CCTTCAATGTAATTGTTATCTAGCAATGATGCATATATCAGATCATGCATGGAAAAAGGC
AGGATACTGCAACTTTAGAGTGAGAAAAGGTGAAAAGAATACTGGTCCAGAAACTTTTTG
GTGGTTGCCTCTTTAATACTACTTTGTGTGAAAAACACTGAGATTGGTGATGATTCCAGA
TAGACATATGTATATACATTAATGAATCGTCCATGTTTATTTGTGAGAAAATATGTTCAA
TGCAACTAAAGAAGACTGAAGTAAATTCTAACTTGTGGTTTCAACAGAAGCATGCAATTA
ACCATGTTATGCGAGGAAACTTTTGCATTCAGTCAATGCGGTCCTCTCATAGGAACCCTT
ACTACACAACTCTTCAAA
>comp366_c0_seq1 len=364 path=[933:0-63 42:64-87 66:88-363]
ATCCAAGTGACCGATATAAGAAGATGGGAAGCTTCTGGAGTGTTCCATGGAATGTTTGGA
CCTGTGTTAGTATTTTCCCTGTTTGTTAAGAACCATTGGCAAAAGCTGAATTGATGGTTG
ACACTCCATTAGTTGTATGTGACATCAAGAACATATAAGCGTATTAGTGATATGCCTTAG
AGGAATATGAATGATGCTGATGTTGTGATGTGATGTTGGATCAATGTCTTTGAGGTGATA
TATGGTTAATGGTTGTAGATTTCATGATTAGTTATGATGATAAATGAGGTTAGATAAGGC
TCACGTGTGGATTTATAATAAATTATCTTAAGTGGTAAATTATCTCATCAGTTATAATTG
CAAG
>comp368_c0_seq1 len=410 path=[1:0-409]
TCTTAACCCAAATGATAAAAAGTGCACACATAATTACCTGAAGTTATTCCCACTAACTTG
GTAATCCTCCAAACATGTTCATTCAAGCAAGGAAATAAAACTTCCAACGGTGTAACTAGT
AACTACCGAAATTTTTATAAGTTGTTCATGTAAAAATCAAAATACATCCAGAATAGTTTT
AATCTCAGGATATGTAATCTACATCATAAAGGTATTACCATATATCACTGAATCAATCAC
CTTATCACAGAGTTAATGATAATAGCACAAAATTCAATTGTAAAGTAATCATGTTCTTTT
CTGTCTTTCCTTTGGGGTGGGGGGGATGCGGCAGGTCATGGAATATTTGGTGAGGAAAAA
AATTAGTTGACGTACTGAAAGACAGCACAAGAAACTTCAGCAAGGACAAG
>comp369_c0_seq1 len=977 path=[1:0-976]
GAGCCTCGTGCATTGGGCCACTCTTTTTATGGTGTTTGTTTCTCAATCTGAAAATTGATT
TATGGTATCTGAGACTGAGTATGCAACTTGCAACATTTTAGATGTGAGAAAATGTTACAT
GATGGTATACCATAAGCGTACTGTGTTCTGACAGTGGCCTAGTCAAGTGGTTAATCGTTC
ACCACTTTATAACAGAATTAACCACTCAAGTGGGTAATTGGTCTTTTTTTGGTCAATATG
ACCATCCACTGGTCCTTGATACTACTACTCCCTAAAAAGAACAAAAGAACAAAGAAAAAG
AAGTGACTAGAGTGTCCCTTCATTCTTTGTTTTCAATTTAAGTGTCATGATAGCCTTTGG
CATAATTCTTGTAATGGAAGACAAGTTCTCTTTGTTTGCCACCCTGGAGGGAAATGAAAT
GTGACGCTATTTATTTAAGTGAATGTTGGATGTTATTAAGTGAACGACTCTGGCAAATGC
AAAATCTGATGTATATGTGTTAATTTCCTTTTCATGGTATATTAATGTGGCTCTATGCAT
TCTAGTGTCTGTATCCTATCATATTAGGAGGCTTCTGGTATGTTGGCACTTTCACCTTGG
TATGTAAGATACCTGGGTATCTCAAATGTAGGGGAATTCAGGAAGCCTCATGTTATGGTA
TGATAATTAAAAATCATTTTGAAAATATCTGTTAATTCAAGAAACTATCATATATTCTCA
TGTAATATGATGTTTGCATACCAAATGTAAGCATCCGAGTTACTGGGAAATCTTACTTAC
TGGCATGAAGTGCTGATGTGCAGAGTCAGTTACATAATTGAGATACAATTAGAGGGTGTT
ATGATTCTTTAGCTGTAAATGGTTTGGTATTTTTAATTAATACTTCTTGTACCTGTTGAA
CACAGTTTCTGGGGTCGTTGATATGCCTCTTATACTTATTTCTTTCGTTTGATTTAGCCC
ATTGCAGATTTAGGATG
>comp370_c0_seq1 len=363 path=[587:0-362]
AAAAAAAAGATTCTCATGTTGATTCTTTGGCAGTACATCAACTACTTACATGCTTCACGA
AGTAAGTTTTTGACATGTTAGAATTTACAAGATGGTTTATCTCACATGGGTTGTGAAAGG
AGTTAAATGGATTTAGTGGTTTTTAATCCGTGGCAGCTGTGGAAATCCTGAAGCATCTGT
TGTTTTAATGGTAATCTGTGGGATGTTTCAGGCGTCGTCAATTAAGCTATCCATCTGCAC
GTGTAGTTCCAGTCAGTTTAGGGTCATCGTCCTGAGTTGTTTTTGGCTTATCGTTTTGGT
CTTCCCAACAACGATAGTGCAGTGGGGACTCCCTAGTTTCCATATATTCATATTTGTCTG
GGG
>comp371_c0_seq1 len=320 path=[298:0-279 578:280-319]
TAGAGAAACAACTCGTTCTCTGAGAGGTTCGATATCTGTAAAATATAGGAATCAGAGTGG
TGGGCTATTATTATATATTCTGATTACTCAGATAACTCTGGTGAACTGTCGTCGCAGAAC
TTTGATCAACATCATCGAGGAGAATGTCGAAGGTTGTGAAATTGGGAGAATTCGTTGAAC
AAAGGCGCAATGGGGATAAAATCCGGTTCATCGTGCAGATAGCCACTCCAGACATGACTG
AGGACATCATTCATCTTATGACGGAGTTTTTCATGACTCGAGAACACCTGCCTGAGTCAA
TGGTTCTCGAGTCATGAAAA
>comp372_c0_seq1 len=620 path=[598:0-619]
AAAACAATGTTTTTCTTTTTTAACAAACTGTTTCGAAAATTGACAGTTTTGTAATGATGC
AGGGTGACTGGTCGCACCAATCAGACCGGTTATGCCTAAGCCCCTGCCCCACTGGATTTT
CAGAGCCCAAAGAGGGACTACGACGCCACCAGCGTACATATTCTGATAGCATGCTAACAG
AGGAAGTACCCTCTTGGTTGAAAGAACTCCTTGATGAGCCAGCGACACCTCTATGCAGAA
GAAGTCATCGACGGTCATCAAGTGACTCTTTGGTATACTTACAAACAACAGTTGAGGCAT
TTGAAAGGAAGGAACACAAGAGCAAACAAATTACTACTGGATCTACAGCTTGTTATGTTA
CATTTCCAGCCTCAGTCGCTCCACAGGAAGCAGATGCCACACAATCAGATATGACTGAAA
ACCAAAATGTAGTAGACCTAGAAGGGTCCTTTGTGCCATATCATTGCTTATATTCCAATC
CTTCTGAAACCAGAATAGTTTCAAAACGTGTCAAACGGCATTCAGCTCAACAATACCGGG
CCAGGAAACTTCAATACATTGCTGAACTGGAAAGAAATATCCAAGCTTTGCAGGCAGAAG
GATCTGGAGTTTTGGCAGAG
>comp372_c1_seq1 len=617 path=[1789:0-616]
GATCTGGAGTTTTGGCAGAGCTTGAATTTCTTGATCAGCGAAATCTCATATTAGGCATGG
AGAACAGGGCCCTCAAACAACGGTTGGACAGTGTATCCCAGGAGCAGTTTATCAAATGCT
TGGAGCAAGAAATGCTTGAGAAAGAAATTACAAGGCTTCAGAATCTTTATCAACAGCAGC
AGATGCATTATGGTAGGCCTCAATCTAAAAATCGAGATCTTGGTTCCTCATTTGCCAAAC
TCTCTTTGAAGAATAAGGAAGCTGGTTTGCAGAAAACTAGATAGTTTTCACTTAAAAAGA
GGCATTCATAAATTCATACTCTGATTGTACAGTTAGCTACCTGGCGCTACATGTCTTGAC
TCCCTTGTTTTTTACTATAAATTGTCATACTGAGGTCTCAAACAAAGTCAAACGTTTCAA
AGTATCTCTAGTTTACTTGATGGAATATCCCCAGTACAATGGACCTCTTAGAAGAAAGTT
GATTCAAATTGGCAGCTATGATTAGCGACATATATATAAGCCATACGAATATGTATGCTA
TTGCCAGCCAAGGACAATAGCAATTGGTCCTAGTAGGCTGTAAAATTCTGTATGTACACT
CTTCATGTTGTATTCAC
>comp375_c0_seq1 len=309 path=[287:0-65 353:66-308]
GTAAGAGGAGTGGGACTTATTCCTGCTTGGGCGTTGGCTTGGCCTTGGTCACAAGGTGCT
TCCAGTGCAATTCGAACCCCTACACGTAAAGTCTACCTACGTGGAGCTCAATTTGCCAAC
TAAGCCACACCTTGGGGTTACAACTGCTTTTGAGTCTGAGCAAAAATACCAGGATATCCT
TTTGTTACAAAAGTAACATTTTAGCTATGTACATTTGAAATAAGTGTTGTCATTAAGCCT
TTGTTTGGGCACAAAATGAGGGGATGAACATGGGAGGGAAGACAATAGGCAAAATGAAAA
TGAGGAAAT
>comp376_c0_seq1 len=573 path=[1513:0-572]
AGAATAAAGAAAGAGCACGAACTTCTTCTCCATAATAAACTCCTCACAAAGGAAGAAGAC
ATGGGGAGGACCTTCAAACTGCCAGCTACGACCTTCATTGGCGGCAAATCGAAAAGCCTG
ACTCTCAAAGAGATCCTCGAGCGGCTGGAGGCGGCCTACTGTCGTCACATCGGAGTCGAG
TTCATGTTCATCAATTCGCTGGAACAGTGCAACTGGATCAGGCAGAGGCTCGAGTCGCCT
GGAGTGATGGACATGGATGCCAATAGCAAGCGGCTTCTTCTCGCACGTCTCACCAGGGCT
ACTGGATTCGAATCTTTCCTCGCCAAGAAATGGTCCAGCGAAAAGAGGTTTGGTCTCGAA
GGAGCTGAAATCCTCATCCCCGCAATGAAGCAGATCATCGACAAATCGACCGATTTGGGT
GTGGAGTCCATCGTCATGGGAATGCCGCACAGAGGCCGACTCAACGTTTTGGCCAACGTG
TGCAGAAAACCCCTCGAGCAGATCTTCACTCAGTTCGCTGCTCTCGAAGCCGCTGATGAC
GGATCAGGAGATGTGAAGTACCATTTGGGAACG
>comp376_c1_seq1 len=504 path=[482:0-503]
TGAAGTATCATTTGGGAACGTACATCGAACGACTCAACCGTGTTACGAACAAGAACATAA
GGCTGGCTGTCGTAGCCAACCCCTCTCATCTTGAAGCTGCTGATCCAATCGTCCAAGGAA
AGACCCGCGCAGAGCAATTTTACAGGGGTGACGGTGAAGGCAAGAAGGTGATGTCTATCC
TCCTCCACGGTGACGCAGCTTTCTGTGGTCAGGGCGTCGTGTTTGAGACCTTCCACTTGT
CCGACCTCCCCGACTACACCACCCACGGAACCATCCACATTGTCGTCAACAACCAGATCG
GATTCACAACCGATCCCAGGTTCTCCCGCTCCTCCCCGTATTGTACTGACGTTGCTCGCG
TGGTGAATGCTCCAATTTTCCACGTCAACTCAGACGACCCAGAGGCCGTGATGCACGTCT
GCAATATTGCTGCTGAATGGAGGAACACCTTCCATAAGGATGTCGTCATTGATATCGTAT
GCTACAGGAGGAATGGCCACAACG
>comp377_c0_seq1 len=330 path=[747:0-329]
TTAAGTAGCTGCTGAATTGTATCTTGTGTATTGAAATGTAGGTGAAGTGAGATAACACGC
TATCATCAATACTTTTATAGATATATTAACATCTTCAAATTATATTGTGGTTATGAGTGC
AACTATGCAACTGTTACATATTGTGTTTTGACAACTTGATTTTGCATATATAGATGTTGA
TGTTTCAAATCCTCAGTTATCCATTGCATGGTGATAGTATTGCTTTACCATTTTTAATCA
TTTAGTCAGTATTGATTGACCTCACATTTGGGTATCATGTATTTTCTCTTTTATTGCCCA
TGATTAAAAAGGTCACATGACCACTTAAAA
>comp377_c1_seq1 len=389 path=[381:0-388]
GTTTGCACACTAGTCAGGGCCATATCATACATATCTCTTATAGCTCAAATATATGAAATA
CGAACTCCTGTCTTCTCTAGAGCCTTCCACAAGACTTCTCGTGGCACCCTATTATAGGAT
CTTTCCTAGATCAACGAAAAATTAAAAATTCAATGTTTTTTATTCCTAAACATAATGTTT
AGAGGTGTCAGAATGTCACATTGAGTGACAGCTCAATTGAAGTGTCAATACTTGGGCCAG
ATGGTTATTAATTACAGGCACTCTTTCCAATGAAGATACTAATGTTATTAGGGTTCACTT
CAGTGATTTGGCAACACACACATGTATATATATGTCTATGTATGTATGTATCAAGTGAGA
GGACAAAATCTTGACCATTGGATCATACA
>comp378_c0_seq1 len=428 path=[576:0-280 24:281-427]
ATGCTAGTAAGATCCTTAAATGGTAAGTTCTTTCAGGAGTGGATTCTGAATATGATTGAT
TTGCTTTTTGGTAAATTTAGACAAAGAAGTTGTAATGTTATATGATCCGGAAAATAAAGA
GGGAAAATTGAGTACTGAATAGAGAGATGAGAGAAAAACAAGATAGTAAAAATCTCGTAT
TTGATGTGATCACTGGGATCATTTTTCTCATATTTTGCTTAGCCTTCTATATGGATGGTT
GGTGGGGAGAAGTTGCTACCACTAGTATTTTCTTTGCTGCAGCATTTACAGATTGGCTTG
ATGGGTATATGGCTCGCAAGGTACTCTAATTGAAACTCTTTCATACACCAAGGCAACATC
TTCAATGGATTTTGAGGGTTCAAGTTGAGACATTTATTTAATACTTTTCTTTTATAATAT
ACTCAGAG
>comp379_c0_seq1 len=451 path=[1:0-450]
ATTCTGTTTGTGTGAATAATTTGTATTGGAGGTCATCAATAATTTGTAGGCCTTTCGGTG
AACAAGCTCCCGTTTCTTTTGGCTATAATTAAATTGGAAAATATTTCCTAGATTAAGGTT
TGCTAGTGCTTTGGCTTTTTAGTTTAGATGAAAAGTTTGAAAACTATTTTATCCTGATAA
CATACCATGTTTGATTTCCCAATTCTGTTATTGCTTGCGGGAAACCAAGCTCACTCTCTT
CCCAAAGATGTATTTACACAACCACAAGCACATGCTTGCAGAATGCTGCATTTAATATCA
AGTACGGTGTTATAGTTTGATGAGGTTCAACATTATGTCTGTAGTTCCTCCTATAGACTT
GGAGAATAATTCTATCATGTTATAGTACCATTTTAATGCAGGAAAGTGGAAGCAGTTTAC
TTGGGACATGAAGTTTTAAACCAAATACTAG
>comp379_c1_seq1 len=385 path=[1219:0-384]
GTTTTTTATCTTTCTAATACAAAATTTAACATATAGTTAAGCAACTTGTTGAGTACCTAG
AGTATAAAGAATGCTCAGAAATGCCCAAAAGAATGTTCTCTTTGATTTCTCCTTTAAGAC
AAGCTTTAACTTTCAGATCAATTAAAACGCTATTAGTTTTAGAATATTTCTACCATGCAA
TATCATTGTGTTCAGCATGGGAAAATTGACTGCGATGTCTCAGACTTTGCAGAAAATTTT
CATTATATAACATTAAAAAGTAAACACACTTTGCTCCCTAATATATCATATCAGAATCCA
GATATATAATCTCATATCATGAGTTCATGACCCACTATGGAACCATAATTTAGACAATAA
ATCCAATACGCTTCTAGTATTTGGT
>comp381_c0_seq1 len=762 path=[1206:0-761]
TCAAATGTCAGGGGGACAAAAACAAAGGATCGCTATTGCACGAGCAATCATAAAAAAACC
AAGAATCCTTCTGCTAGATGAAGCAACAAGCGCACTAGACTCTGAATCCGAACGAGTTGT
GCAAGAAGCTCTGGACAAAGCTGCGGTGGGACGCACCACCATTATCATAGCACACCGCTT
GTCCACCATCATAAACGCTGATGTCATAGCCGTGGTGCAAAGTGGGAAGATCATGGAGAT
GGGCTCACACCACGAGCTCATGCAAAACGATAATGGGCTTTACACTACCATGGTTCGTCT
ACAACAAACAGAGAAATCGAGCCAAGAAGAAGATACCCTCTCTATCCCTGCTCCTTCTTC
TATAACAACCAGAGACATTCACAGCACCAGCAGCCGTAGGCTTTCCCTTATGAGCCGTTC
TAGCTCTGCCAGTTCAATCGCTCGCGTTTCGTTTGTTGATGATGATGATGTTGAAGAGGT
TGCAGAAGATAAGAAGCTCCTGGTTCCTTCGTTCCGGAGGTTGCTGGCACTGAATCTCCC
TGAGTGGAAGCAAGCATGTTTGGGGTGTTTGAATGCGGTGCTGTTCGGTGCGATTCAGCC
ATTGTATGCATTCGGAATGGGGTCCATGATATCTGTTTATTTTCTCGGGGATCATGATGA
GATTAAGAAGAAGACCAGGATCTATTCGCTTTGCTTTCTGGGGTTGGCTGTGTTCTCGTT
GATTGTTAATGTTGTTCAGCATTATTGTTTTGCTTACATGGG
>comp384_c0_seq1 len=397 path=[1:0-396]
GGTTCCTCTTTGATATATTGTTTTATTGTACTCAAAGATTCTTTTGCACCAGTAAATCTA
ATGGAAGGTTTTCTTCTCTATCAATTTAATTTGATTCCAACATTGTTTAGTTGAGATTTC
ATATTGTGTGGCAAAACATGTCAACGGTTTAATTCTTAGTTGAGGTTTTTATTGCCATGA
GATGGAAAATCTTAAATAGTGAATCAGCCTGCTTCTAATTTTACAGTTTTCTCAAATAGA
TGCCATCTTATTTAAGCTCATGTTTATTATGCCCTTTAATGCAACATGTCTTAGAAAAAA
TTGGTGGGGCTTCTTTCTAATAGTTTTGTATGTGTGTATTGCTGCCCTGTTGCATAAGAA
ATATAGTTATATATACTTATATAGTCACTTATATGAG
>comp386_c0_seq1 len=553 path=[472:0-276 1242:277-552]
TATTTAGGTACCTTGATTGTGAAGAGTAAAGCTATAGCAATTTCAAGAAGGTGCCTGTTT
TTCCTTTCAGCCACACCATTCTGTTGAGGTGTGTAAATGCAGGAGCTTTGGTGAATAATG
TCATTTTCTTCAAAATAATTGCCAAGGATACTGTTAAAGTACTTTTTCCCATTATCACTT
TGAAAGACTCTAATTGATTTTTGAAACTGGGTTTTTATCATGTTATGAAAATTTATGAAC
ACTTTTTTTGCATCAGATTTTTCCTTTAACAAGTATACCCATGTGAGTCCAGTGTGATCA
TCAATGAATGTTATGAACCATCTTTTACCAGTTAGAGTATTTACCCGTGAAAGTCTCCAA
ACATCACCATGAATTATTGGGAATGGTTCAGAAGGTCTATATGTTTGTAAGGGAAAGGAA
GTACGATGGTGCTTATCCAATTCACAAATTTCAGACTTGAATGAAGATGAACTTTTATTG
ATAAATAAACTTGGAAACAGAATCTTTAAGAACTGAAAGCTAGGATGGTCTAACCTAAAA
TGCCATAACATGA
>comp387_c0_seq1 len=363 path=[370:0-362]
TGCGTAGAATATTCAATCTGCATGTAGGGCAAGTTTGCTGCCTTTGGAACCACGATCTCA
AACATGATGTGTGGAATATGTGGTTACAAGGTAGCTTCTTGGACGCAGATTGCATCTCTT
CACGACAAATTATGCAAACATTGTCAGCAGCTGCTAATTCTTCAGGGGTAGCGTCAGGAT
AGAGTGTATTCATATTCCTAATGGCTCTCCTGGACATGATGACATCATTTATTGCTTTCT
TGAATGCCCTCACTGTGTAGTACATAGGGCGGAAAGCGAATAGTGGTAGAGTATATATCC
TGACCATTATGAATACAAATGAAAAGTAAAGGATGACCTTGATGAATCCCATAACAAGGC
TGT
>comp388_c0_seq1 len=478 path=[791:0-477]
TGAACTAACTTACATTAACCCATAATAATACATTCCTGAATACTTTTGTATATTCTAACA
CTCCTTCTCAGAAGAAAATAAAGAAAAACAATGAGTATTAACACAACACCAACCCATCTA
AGAACTTAGGCAACTGGCACTCTCCCAATGTGGTGTATTAGGCAGATACCTTTGACCTTG
CTACACCTCAGAGGCCCCTTTGATCTTCTCTCAGCTTCTCATCGACACACGTCAACAAAC
ACGACTATAAGTCTTTTGCCTCGGACCCCAAGTCTTCATCCTACAGCTCCATTGACAGCA
GAAATAGAGAACGAAGATCAAAACACTCACCTGTGATATTAAACCACCACAAATACCAAC
AATCAACCACCAACCTCCACAAATACCCGCAACTTCAAACTATATCATTAGACCAGTCAC
CAGAACAAAATAATGGAAGCTTCACCCAGCACTGCACTCCCAATCAAAGGAAGAACTG
>comp388_c1_seq1 len=418 path=[1:0-417]
GAGGAAGTAAAACTATTGGGTGGATAAGATATCCTAAAAACTGAGAAAATAGGATGACAC
AAAGAACCAAAGAGAATCAAAAGGGCATATAGTCCATGTGCATGCCACCACCATTTCACT
GCCCCGTTGTCCATGTGCCAGAACATGAGAGAGTACGAGGCACTGATTTCTTGTCATGTC
GCTTGGGATTGAATAGATTTCGATGCAAGTGATTGTCGGCCAAGTTCTTGGCTCATTTCT
GGTTTGTGTAGTTGCATCCTCAAGCTATAATTTTTCCATTGGTGTTTGCTTGGTTCTGTT
CAGATCTGAAAGTGTTTTTTCCCTTCATTATGTGTGTTCACATAATTGGTTATTTTTTGG
TTGATTGCTATGCTGGTTTCTTTATAGACAGAAGTGTTGCACAGTTCTTCCTTTGATT
>comp389_c0_seq1 len=357 path=[337:0-356]
CTAATGTTCATATGCTTGTTGGTTTATAGTATGTTGACACACTTTTAAGCTGCTGTGTCA
AACTTCTTGAATCTGAGTTCTTAGTTTGATAGGCATTTGTTCAAAGAATTTAAATGCTGT
AACTGCATGCCAGAGTGTTTGCCTATTCTGATTAATGGTTCTGTTTTAAGGATGTGAACT
TGATGTATGGATTATGCTATCTAATCTTTGGGGGTTTGGGAATTTTGGGGTTGCTAGGAC
TTATTTGTTAACTTGAAAAGGATTATGATCCTAGTCTGGTTATTGTTGATGTTTTGATAA
TGTGATGCCATGCTGTTTGACTAGATAAAATATTGAACTTTGGTGGGTGTGAATGAG
>comp390_c0_seq1 len=827 path=[2496:0-263 1679:264-277 1693:278-826]
CAACTATAAATACGCAGAGAGGAGAGAAGATATCTCAACTCCTCAGATAATCAAGGAAAA
CAGAAAAAACTTATCCTAACTCATTAACTCCTAACTTTTGTCTGCCCCATTTAATCTTAC
TTGAATCCAACACGATTGGGAAATGATCAGAGACAGGGCGTGTCATAATTTGTTGAACCA
GGTCTGGAAAATTGTCCTCCCACTCACTAAGAGTTAGAAATCAGTCTAGTCAGGAAGCGA
CTATATAACCTCTATTTACCAATTAATTAAACTGAGCATTAGATAAGGAGGCATTCCTTA
GGCCACTATCCCAAATAAAGCTGTCAAACCCTCTCATGGTTGAAGTGACTGTACTGCCAC
CGAGCTTTTCATTTGGGAACCTTGCACAAAAAACCTTGGGCATTACATAGCTCTTCCCAA
AAGTCAACTACTTGGTTCATTTTTCCATTGTTTGAGAATGTCTTCTGATACTACTTGTTC
TCAAACTCTAGATCGACATTATAATGTACAAGATACCCCTCCCTATCAAATCCATGCATG
AATTCCACGTTCTCCAAATCATCTCCAGGATCTTCATTCACAAGTGCATCAATGTTGAAC
TCTTTCCTCCATTTCTGTTGTGTTCTTAATCATGACAAATGCATCCTTCAATTTGAAGTC
TCAGGCTGTAAGAAGCTTCTGCAAATTCACATCACTCCTGTCATCCTTGAGCAGAGGAAC
TCCCCCAAATGAAAACTTCCCTGTACTCTTTTGCTACTTCCTCTGCTTCCTTTGCCGGGT
TGGCTGTGATGCCAATGTTTTCACTTTGGTCCAAACATCTGGGGGAT
>comp391_c0_seq1 len=328 path=[1:0-327]
AAATGAGGTAGTGATAATAGTAATTTTTCTGGGATTCATATTAGAAGTTATTGCTTGTTC
TATGAGATAACGATTGTTGACTGATTGAAGTTTCCCACAGACTTGAATTCTCACCCTATG
AAGATTATGTTATGTTTACTGCTTGTTGATTTATATGTGGCTCGAGTCAAACTTCCAATA
GGTTTGTGAATTGCCCAGCCTTGTCCACATCTTATATTTAAGTATAGTTGTCACTTGTCA
TTTGGATTTAGTGTGGGGGCTAGGCTATGCAATCTTTGGAAGACACTAGATGATAGGAAA
TATTTGTGCGTTTATTTTGCAGTTGGAG
>comp393_c0_seq1 len=1111 path=[1089:0-1110]
GGTGGGTTTTTTATGGGGGGTTTCTGGAATTTTTGGGAATTCGTCAGCTTGGTTTGGTTG
ATTCTTTATGTAAAGCTTTACCAGGCCAATTGGGAGTTTGTATTAGGGTGTGTTCATTGG
GTTGGATTGACCCGCCAAACCGAAGCATAATGTGTGGGTTGGGTTTTCTAATTTTTTTAA
TACGAAACGATGTCATTTTGGGATTCCATCCCCAACAAAATGTCATTTTTTAGTCCCACC
CAAACCAACCCAACCCAAACTTTATTATTATTTTTAATTTGTGCATTTATTAAAAAATAA
AAAAAATGCCAACCTAATTAACCCAACCCAAACCAATCCGATAACTGTCAAGTTGGGTTG
AGGAAAAATTTCCTCCCAACTCGACTTGACCTAACCCGACCAATCATGATTGGATTGGTC
TTGAAAACTCATTAAACCTGGCCCAATCCGACTCTTGAACAACCCCATTTTGTATTCCCA
TTAATCAAAATCAAGAATAAGCCATAAATAGAACTAAATTGATCATGACAGTCTCCATGG
TTAGAATCTTCTCTCTTAAAGAAGGGGGCTACTCTGGTTAATTCTTTAATCACATGTCGT
GTGGTTCTAAAGCTATAGTTGCAAGAGCCATTCATTTCCATTACTCAGCCATTTTGGCAT
ATTTGTTTTGGGAGAATTCCCGAAAACTAAAGTCAAGCCAAAATGTTGGAATTGGAAGAA
ACTGACGAATGACAACTGATGAATCAAATCGCATAATTAGTGAAGGATTACCCAATTTTA
TGACTGAACCCCTTGTTATTAACTAGTTCTCTTTGGATAAACATTTTGGCTTGGGTTGAC
TTGTCAAAATGTTTTCCAATTTTTTCAAGTCAAAAGGGTAGGTTTAATATTTTAGAGCAC
AAGAGCTGGCCTTCTGCTTTAGGGTTTCCATTTGATTGTGTACATGGGTAGGATTGCACT
TTGCAGTCCTTGTCTTTCGAATTCTGTAGATGCACACCCTGAACACAAACATATCCCCCA
TGAAATGATCTTTGTCATGAATGTTTGTGTTGTTTGAGACTTTTACAATTGAGTATGTAC
TTTTTACAGGTGACTCTTGTAAAAATGGTAA
>comp394_c0_seq1 len=385 path=[591:0-384]
CTGTGTACTCTAATTCAATGGAAAAAGATAATGACAGAAACTAACACTAGGAGATGAATT
AATAGGCTCATTATCCTAGAAAACTGTTTCTTGTGTTGTCACCAGCATGGGATTCTTCAG
GGAAGAATCAGGAGTAGGAAATTGAACAAGGAGCAGTGGGTGAAGTGAATTAACAGAAAA
TGTCCTCTTTGTGGGGACTAAAGGATCACAGCTGTAATCTACATTTCTGAACGTTTGGCT
TTTCTCTTGTCCATGCATGCGAGAGGTGGTGTAACTGTTTGATTGAAATGAAACTTCCTC
AATGATTACTTGATTATAGGAAACTCTTCTAGTATAGATGTTAAAGCTTGGCATTGCCAT
GTAATTGCTTGGATAGTACAGGATG
>comp400_c0_seq1 len=327 path=[751:0-326]
GTTAATTAGGAAAATTTTGATTATTTTCTCTTAATTTTTTATAGAGTCCAATTACGTGAA
TTGATAATGCATGTAGCCGACCCTACTTTGTGTAATAAGACTCGGTTATTGTATTTTCTC
TCGGTAACCCACATACTTACAATAATTAAGGTCTTTCTTGATACTGGGATTAATTCAGTT
TCCAATGATACTGGGATAAATTTAGTTTTCGGTTATTTCCCTTGTGTCAATTTCTATGAC
TATATCTATAATTGTGTTTATGGGAGATGTTGTCAATGACATGTTTCTTCAATATTTTTG
TTGCAGGCGTGATAGTTTTATCACTCA
>comp400_c1_seq1 len=398 path=[376:0-397]
AATCAAAATTTTCCTAATTAACAAACTCAAGAACCTAGCGACTATGCAACCAGAACCACA
CCAAAAACTTCACTCTTGCCAAAAGAAGAATGAAATATATATAAAAGAAAGCCAGATCTT
TGATTTTATATGAATGGTGCCGGAATTAATTGTGGAACAACAATTGTTCCAAATAGCAAT
TATATAGCCGACCAAATCTATAGGGTCGTCATATTTATTTCAAAATAAATTAAAAGAAAA
GAAAAGAAATTAAGCATTGAATTAATTGGAATATTTTTTCGCTGAAATTCCGATCTACTA
TTTTGAAATAAGAAAACTACAGCAGAAGGAGAGGGCCCAGAGGATTATGCCAAAATGTGA
TACACACCAATAACTCCAAATCGAACTGCCACTTTGAG
>comp404_c0_seq1 len=425 path=[403:0-424]
ATAACATTAGTAAATGGCTACAACACCCTCCACCAGAAGAATTATATCAGTACTCTTTGC
TTAATCAAGACTTTTCCAACCGTGTGATTAGTTGCATGGGTGCTGATAACCATATATATT
ATTAAAATACATGAGATGCTAATTGAAGTTTTCATCTCCAAACAATTGCTTGTAGCTCTT
GATTTTTCTCTTTTATGTTCTGGAGAAGTTCATTCATATTCGTTAAATTTGTGTTGCACC
TCAAAAGTCTCAAGTTTGTCAATATTCTGTATGTTATTATATATTGGTACCTGGGTCCAA
ATTCCATTAATATTTAGTGTTTGAATGGGTTGTTGTCATCAATTATGAGTCATTAATGAT
GCATGCTTTGCTGATTCTAGACTGATGATTTTTTGGATGCCAGGTTGTTTTGAAGCAACT
TAGAA
>comp405_c0_seq1 len=420 path=[1:0-289 732:290-419]
ATGGAGATTACACTCGCTATCGGTTTGTATCTTGATCCTTTATATGGTGTCAAATAGCAA
TTTCTTTTTCTGTATGTAGATTTGTTTTGCAATTTGCATCCCAAACAATGATTCATAGGA
GACACAATGTACTAGTTCTATAGCTAAACAGCTTAATTGTGCCGGTGAAAATGGCTCGGG
ACATTTCAGCTTTGTTTTTACTCTCCATGTTGTGGACAACAATTTCACCTTTATAATTTT
GTGCACCTTGGTGCTTCAAGTCTTCTAGCATTATAGCCTGACCATTCAATGTATGTGATC
ATAAAAACTTATAGAAACCTTCGATTCAAGCCTGTGCTTTAACATGATTAAATATCTATA
TATTGGTAATGAATGTATTTTTTCCATTGACATTGTAGGAGGTATTGTACTGCTCGTTTG
>comp407_c0_seq1 len=524 path=[502:0-523]
GGAAAGCAAACAAATTTGCTAAATTTAAATATTGATCAGCTGACAAATCCTATTTCATCT
CATATTCAAAGCAAAAACTATAATTCAGAGTGAACAAAGATAGTAGACACTTCTATTATA
TAATAATCAATGTCAAAAATAAATAACATTATCTGGCATGAATTTCTAGCATTCAAGGGA
TGAGCAGCAGAAAGGTTGCACTTTATTTCCCATATGACATTGAAAATGTTAGCTTTTCAA
TCTCATATAAAAAATGACTATATTCAGACTATAATCACTAAAAGAATTAAGAAAATACCA
GAATGCTAAATGAGTTTCATTCAAAGCAAGGAAGTTTCACCAGAAATTGGTCCAAAAATA
ATTATTAACAATGCAAAGAGAGGTTCACTTCTCTACTGCATTTGTCAGCACTGATCACAA
GAAGATTACCAGAAAGGCTTGACAAGAAGTCTGATCCACAGTCCAATTTGAAAAACGGAG
CCTAAACATGTACAAACAAACATCACAGGTTCCCTCTTTCTAAC
>comp409_c0_seq1 len=350 path=[588:0-96 261:97-349]
CTCTAACGGTTCATTAAAACTCTTAAGATTTAATGATTTTTACAAAATATTTCACTTTTT
TTCCCTATTTGCGAATGTTTTATTTCCCCGATTTGTATTTTTTTTTTTTCAATATAGTCT
TGAGCGAGAGGAATCAGTCTTTGATAAAATATCACATACAGTTGAGGGGTTTTCTTATTT
CAATAAGTGAAAAAATAACATTACACGAGAAACAATACGAGACTCGGGCAGGCCGTAACG
AGGAGCCTTCCCGATTAAAAATGTGTCTTCGTTAATTTTTAAAATTCAATTCCATTTTTT
TATGCTCGTTAATAAAATATATGGAGAAAATGCTGCATTGGGACAATTTT
>comp410_c0_seq1 len=433 path=[587:0-281 177:282-432]
TATATTGAATAATAATTTAATAATTGAATTAAATAAAAAATATTAACAAATGTTTATGGT
GAATGACTGACCTTTTATGTTTAGAAGGAAACATAAGAAAGAGATGCAGCGGTTTCAAAT
TTCGAAATCGGAATTAAAATAAAAAATTGGCATGTGGCATTTAGAGGTAGTCACTTTATT
AATAGATAATAGATTTATTTATTTTAGAGAGAGCAAAGCTGAGATCTTCTCTCTCACCGT
AATTCTAGTTATATTCTTCAACTAAAGTTTTAAGGCTACACATAAAGTATAGATGTCGAG
ATGTCTCAACAAAATCCTTGAATTGACTCAATACTCGATACAATGGCATAATATGTTTCT
TTTCTTCTTTTACATGGTTAATTTTGTATATTAATATTTTAAAAATCGGTTTAATTAGAT
AATATAAGAGAAG
>comp411_c0_seq1 len=435 path=[413:0-434]
ATGATGGCATGAGGTGAATGAGTCCCAAGCTGGCATCTGCAGCTTAATAAAGGGACATCT
AAAGCAGGATCAGCTTCATGCTTAACTAAAACAACTTGGCTTACTACGTCAAACTCTTCA
ATTATTTGTCTGCCAACTATTTATTTGTAATCATAAGTTTGGCAAGAGGCTTACAAGCCA
ACAGAATAACTAATCCCGTGATCCTCCTAATAAGTTCTAGAACTGGAAGAATCAAATGAT
AATATAACTTTGAGCACAATAAAAAGATTCAATTAAGTTATATAACAATTCTTTTTTTCC
TACACTCACATGGAGCATTCCACTGCCAGCTTCCAGCAAATATAGTCCAACTATGAAATT
AGCTCTCCAAAGCCACTCAGTAATAGAAAAATATTTCAATCACATTACAGAAACATGTAG
AGAGACTTGTTATAG
>comp413_c0_seq1 len=551 path=[529:0-550]
GGCACTCTCAAGTTAATGGTTGACCTTTTCTTCCTCAAACAGTATCAGCACTACTTGCCA
TTAGATTAAACTCAAAAATAACAATTGCCGAGCTACTTTCCATCCTTGTTCCCCTTCGCC
TGGGGTGGAGGAGCATTAGACCCAAAGATTAGTAATAACAGTTCAAAAAATTTCATTGGC
GTCACTTTAAGAATATAGCTTTAGGGTTGTGGAATTTTGTATGTATTCTTTCATAATTTA
CCTAACTAAAAGTTAAAATTCCATGGAAGTACGGTTTAAAACAAACTGCTGAATGCTATA
GTAAACAGGTGAAGCCAGACCAACAGGAAACAAGCCCTTATCACTCAAAACATTACCTGC
AAAATCCATCAACCTTACCAAAACCAGTCTTCTCTCTGTGCTCTAGTGGAAAAAGAAAAA
TAAAAAACAGGGAAAATATAAACTTGTACATATCTTCGTAAAGTCAAATTGTATTGAGTT
TATCAGGGTTATTTTCAGAAATTGTTTTACATTTCTCATGGTTTGAGTGCACTCCATGAA
ACATGCCACCT
>comp414_c0_seq1 len=439 path=[1:0-438]
AGCATCCAGATATGTTAATCTGAAGGGAATACTGAGATCACTCAGTCAAACTATTTATAA
ATAGTCCAACCACTTGCCAGGTGGTATAAGCAATCATCAAGATGCATCTTTGCTGACCAC
AAGTGGATTAAATAAAAATAATCCCTTTAGGGTCATCTAGCAAACCGTCCATATACTTTC
CAGAGGACATTTTGACTTACCAACTAAAAATCTTGGCACAACATACATCTCAATGACCTA
CAATATTGTGTTTGCATCTTATGGTAATTTTTAGCTTACAGGTTGGAGCATTATCCATAG
TGAATACACCAATATGTTACATAATTTCTTAAAACAAGCACACCAAAGATAATATCATCA
CAGAAAATAAGACTCTAAGCAAATAGTCCAGCTGTGGGGTGGATTAGAATTCTTACTACT
ACTTTCAATGTCTCCAGCT
>comp415_c0_seq1 len=333 path=[311:0-332]
TAAAACTTTGGAATTGATATCTGGTATTTTCTGCTTGTCTTTATTACTTGATATCTTGCT
TACAACTTCTTTTCAACAATAATGATCTAATTGGTTTGGCAGAAGTAATATAGACATACG
ACTCTAAATTGAATGACTAGTCAATGATATATAACCTCTTTTTGCAAGTTCAAGTTGGCT
GTTAATTAATCACTACATGTAGTGAACTTGCAGTTGGTGTAACGTTACATTTGCTATTCA
ATTTTTGTACAAATGGGGAAAAAGTTAAATCTAGGCACTACAGGAACACGTGTAACCAGT
TGATCATTGACAATTGAGTTCTTGGAGAATCAG
>comp417_c0_seq1 len=586 path=[1:0-585]
GAATACTTTAACTGACAATTTCACATAAAAGATGGCCAATAAAATCACATTTAATTGCAT
GCCTGGAAATATTTTACAAAAAGGATTAACTTACACAAAACTTGCGCCCCTTAAAATTCA
CTGATCATACAATCACAAATACATGAAATGAAAATTCCATTCCAATTTTAGCTACTTTCA
TTTCCAATTCAAGTAGAGTCAGAATGGATAAGCAGAAATGCAGGCAGGTTCATTTATCCT
TCTTGGTAAACAATAGTTCTTCACTCCAGATTTATCACATTACTTGCTTCACTTTGATGT
CATCATGGTGACGAATTCTTCATAGTTAACCTGGCCATCTCCATCAATGTCCGCTTCACG
GATCATCTCGTCCACTTCCTCGTCTGTCAGCTTCTCTCCAAGGTTGGTCATGACGTGCCT
CAGCTCAGCAGCGCTGATGAAGCCATTGCCATCCTTGTCAAACACTCGGAACGCCTCTCT
GATTTCCTCCTCGCTGTCGGTATCCTTCATCTTCCTCGCCATCATAGTCAAGAACTCCGG
GAAGTCAATAGTGCCATTTCCGTCAGCATCTACTTCATTGATCATG
>comp418_c0_seq1 len=526 path=[1:0-525]
GCAAAAATAAACACATAACACACAAAAAGGAGAGGATCGATCAGTCGATCGGCCATCCGA
GCACCTCAGGAAGGATTCGACCAGTCCATTGATTATGCAACTGGAAATACAAGTTGGTCG
GTTTGTAGGACGATCGGCAATGGGAGGCGAGATACACGATCAGAGATTAAAACACATGAG
ACGACAAAAAGGCTCGGTTGGCCACAGGAGATCTGGAAATGGGATGATCGGTCAAAAGAC
AATCAGATATAGAGGATTATAGAAAAGGATAGGATCGTGACGATTGGGGTGAAAAACATG
GGAAAAGCTCATCAGTCGGAGACGAATCAGTTAAGTTGGAGTGGAAACTCCGATCATTTA
GTTGACAAACATGAAGGGGGTTGATCGGTTGGGAACTAATCGGTTAAAGGTAGGTGGTGA
TCGGACAGAGTAAGATCAAAGGAAAGGGATGTTCTGATTGGTCATATCCGATCAAAGGAA
GAGGAAGTTAAGAGTAAGGTCTGCTCGATTGGGTAGTTGATCTGAG
>comp419_c0_seq1 len=334 path=[835:0-81 41:82-105 65:106-333]
TTTTAAATTGCGGTCCGCAACTGCCATTGCAGCTGCAATGATGCAGTTTTGGAGGTCTCT
GGAACAGCAACGAAACTGCAAGTGCGGCCGCATCAGTCGCATTTTCCTGTCGTTGTCCAC
AACCGCAACTGCAATTTAAAACCTATTTCTAACAAGACAGGCTAGGCCACAAATTTACCA
AGCAGAAAAATCTGTTTACCTGGTATATTATGGACCAATAACCACATTCAGGAATTTAAA
TTATAGGAAGAATGTATTGGTTAACATGGTGTCTTGGAGACATATTCAAAAATAGGCAAC
AGTTAACACACCTGGGAACTGAGAAAACGAAGTG
>comp422_c0_seq1 len=489 path=[1:0-488]
AAATACTTTTCTCTTATTTTGTTTTTTTTTTCTCTTGCTACCCAAATAATTGTGTCAAAA
TTCTGTGAATCAAAAATTCAAATAAGAAATATTGAATAAGAATGAACTAAAATACACCAA
GATGACCGTATTAAATATTGATACAACATATTGGGTCATGCTCGTCTATGACAAGCTTGA
CAACTCTTTGCCAACAAGTGGCACTACCACTTTGTGGGTTACAGTGTATACATGTCACCC
ATGCTTGGGTGGCACCCCATCTTTAAATGAAAATTTTACGTAGCATAAAGAATTTATTCA
TAAAGGAAATTTCCAAGCTTTATGACTTCTACCATACCAAGACAGGTGCTGCCTTGATGA
ACATTTGCGATTAAAACCGACAAACACCAACCAAAGTTCAGATTCAATTTCGTAAATACC
AAAATGTTGCATGAGAATATTAGGCAGCAGATAATTTATGGCCAGTCTACCACAAGATTT
GATTCTTGA
>comp425_c0_seq1 len=575 path=[1:0-574]
TGTGTGTGTGTGTGTGTGTTTGTTGGTTGCTTGAGGTTGCTCCTATCTCTAGCTAACATT
CCTATATCACAAGCTTGAATCATTCCAAGCATCTCTTTAAGTATGTTTTCATTCTTGCTT
GCCTCCAAAGCTACAGTTATTTGTCGTATAAACTCATACTTTCATTCTCAATCTATCTAG
AATCATTTTCTTTAAATTTCTACGGTTATTTATTCTGTGAGCTTAAGGTTTTAATTCTTG
AGTGCAAGTTAATTTGGACACAACACAATGCAACCCCTTTATTGTGTTGTCTACTCTTTC
AGATTAGCCTTAATCTGAAACTAGGATAGAACCGGTGTTAGATAATATTTGACTTCAAAT
GGCTCTCTGCTTCAATAGGAAACACCATAAGATATGCATAAATTGCAGCGTTAAATTTAC
TTCTAAACTTAAATTGTAAGAAAGAATAGGAAAAAGAAAATAAATATATTATACTGATTT
GTTGAGATTGGTCCACTTATTTATTCTTTTTCCTTCCAAAATTTGCAAGACCTAATGGTG
ACAAGAAGATACCTCTTTTAGTTTTGATGATGCAG
>comp426_c0_seq1 len=305 path=[1:0-304]
GAAGATCTTTCTGGTTTTCTAGTGACGGGAACCTTTCTTGTTTTCTCTCACACTCACACC
CACAGCCCCTCAAAGATCAGAGAGAGCTCTGGTACCAAATGTAGGCTTTTAGAGAAAGAA
GAATAGAGAGGAAGTTCAGTAACAGCTCACACTCTTAGAGCTGGTTCTGCATTCATATAA
TACATATATACTAATACAAGTCACGTTTTTGTTCACCTACTACAACAGCTTGTCTTTCAT
AATTTCAGCTAACTTTTTATTTAGTCCACAGACTCATTTTTCATCATTACAAGATTCAAA
ATTTA
>comp429_c0_seq2 len=672 path=[1145:0-120 617:121-671]
TAGATCCTTCAGGATCTTTTACCTGTTAACAACTGTCAAAATTGGCCTGGCCCAGTAAAA
TTATGGGGCTGGGCCTCACAAGTACCAACACAACGTGGGGTGGGCCAATTTGGCCTGATT
TACTTTTGGGCTGAAATCGTGCTGGGCTGCTTGATCCCTTTCAGGCCAGCCCGATCATTC
TTGGGCTGAAATCAGGCCAGCAGATCATTTTCGGGATGAAATCAGGCTGGCCAGCCTGAT
TACTGTGTTTGTGTGTTAGGGTTTCCTGTTTGGCTGTTTCCTCCGCCGTTTGTGGGTTGT
TGGTGTAATAGTGTCTCCACTTATCTTCAATGGGGTCTGGCCTTCTGGGCTCTGGGTCTG
GGATGGAGTTCGTTTATTCAGTCTATGACTGGTATATTTAATTCTGTATGAACACTAATT
ATAGGTGATTAATTCAGTGATTCGGTCAAAATCAGTTGAGTGATTTAATTCTGTTTGAAC
ATTAATTCTGTCTTAATGAGAGATGCGTCATGCATGTATGATGGCATTAATGTTGTCTTT
ATTCTATTTGAGCATTCGTTCTGTATGAATGAGGGCATTAACTCTGTCTTATTTGTTTGA
ACATTAATGTGTTGAAGATGGTACTTTGCTAATTGGAGCAGCAGATGTCAGTGGGTTTGA
ATTTAATTGGAG
>comp430_c0_seq1 len=661 path=[1:0-660]
TTCTCTTGTCTTTTCTGCATTTCTGTTCCACTTTGAATTTTGAAGCCACGAACATTCCTT
GATGCTTCCTTCTACCTATTTCCTTCAATCATGCATGGCTCTCTATATAATAATATAGCC
ATAAACTTGCATGACTCGCTTTCACTTCATCTTTAGCTCAACTGTCGTTATCTTCTCTCC
ATACTCGTCTTAGAAATTAATCTTTCATTCTTTAATTATAATAACTAAAATCCAACTTAT
AATCTTGTCTAATACCATGCCTTGTGCATCTCAGTTGTCCTCTTGTATGCCTTTGTTCTA
CTTCTATTATGCCAAAACTTGGCCTAAATAAGTAAGTGCCCCTAAGAGAAGTCTATTGAA
GCCTCTTTTCAGTTGGTACGTGTGACTTCACTCCCTGAGCATTGAACTAGTAAGCCATGA
ACTTTTGTATAGGTCCAAAATTTATCACTTCACTTTTATACACACTCATAAAATTTAAAC
TAAAATCATCCACAATAAAAAAAATTTCAATGTGCTGTCAAAACTTTTATAAATGTATAA
AAATAAAGTAATAAGTTTTGGACTTATATAAGAATTCCTCTTAGTAACCACCACACCCAC
AGCAAAACAAAAAACACGCATGCTTGTACTTACCTACCAGAGACGCTCCTCTCTGCACGT
G
>comp431_c0_seq1 len=470 path=[632:0-469]
GAGGTCCACCACCTGGAGACAGAGACTTGCCTCGACCGTCGTGGTGACAGTGGCAATCTT
CGTCGTCTTCTTCGAAATAAACGTGGTAGGGAATATGATCGTGGTGGGATGGAGATGGTG
GGCAGCAGGGGCTGCTACGAGGACCATGGCTTCGGCAAGGAGGTCCATGGTGAGATATTC
CGTGGTGTGGTCCGCCATGGTGTGGTCCATGAAGTCCGAAATGTTTTCTAAACTTGTGCA
CCATTTCCGTTTGGGCTCCTTCGCCATGAGGCCCAAAGCGAATCATCTGGATAAAGTGGT
GTGGTCCTCCGTGATGTGGACCACCATGTTTGTGCCCCCCGAACTTGTAACCTCCATGGT
GTGGACCCCCGAATCGGTGACCTCCATGGTGCAAATCTTCACATCTGTGACCTCCATGGT
GAGGTCCATCCAATTGGTGACCTCCATGGTGAGGTCCACCGAATTTATGA
>comp438_c0_seq1 len=507 path=[1:0-506]
AAACCAGAGAACAGGTTCCAGAAATTAAAGAAAAAGGCCATGACAATGGCTGCTAGTTGT
TGGCCAGGAGTCAAGGCAACCACCACCATCCCATACAAGGACAAGTAAGTGAAGCACATG
AATATGAAGTAGTAGAAATAGAAGAACTTGCCCACCTCCCAGTGGAATCCAATCATAGAG
TACAGAAGAAGGCCATACACAATGGTTTGAAGTGCCACATAAATTGTCTCAATGGCTACC
TGGGCTAATGCGTAAGGCAATTCTGAATACATCCCTGCTGCCCTTTCACGGTAGAAGACA
GTTCTCTCAATTGACACCACCGGTTGAACAGTAGTAGCATTAGTAGCACCAAGGAAAAGA
ATAGCAGAATAGATGGCTCCAATAATATTAGACATGTCTTGTTGGGTTCCTAATTTATCT
CCCTTGTTCCAAAAGATTGCACCAAACATAATGCCAAAGAGAGTTGTCATGAAAAACCGG
ATAGCATTGTATTGTGAATTCCTCCAG
>comp438_c1_seq1 len=392 path=[1338:0-391]
ATTGTGAATTCCTCCAGTATGACCAATGTTGTTTCCAGAAACAAGCCTTGCACTGAGTAA
CAAAATTCTGGGAGTATTTCGTGGGGAAGTAAAGATCCTGAGAACCTGGTTGCGGAGTGC
TTAACTGCTCCATAAGTTCTTGGTTTCTCCTATAGAGCTCAGAGTTGGCATAAACTTCTG
CAAAGTCAACAATACTAAGTTGAGTCTCAACTGCAGTAGAGCTGACCTCTAACATCCAGG
TAGCAGGATTGTAACCCTCTTTAATCTTGGGAATTCCTGGAATAGCCTCAAAATACTCGA
TGAGCTTGGTAGAATGCTGGCCAAGAGGTCCAGCGTAAATCACTTGTCCTCCTCTTTTCA
TCAAAAAGAGCTCATCAAAAGCTTCAAATATG
>comp440_c0_seq1 len=478 path=[456:0-477]
TAACCATTGCTCTCTCCATCGATGTTGAATTAGCATCCAGATAACTCTATAAGAATTTAC
TTAATCACTGACATTCCACGAACCAAAATGCCTGGCTCAAGACCAGATCAGCTTTTCATT
CAAATGGAGCTGTGATGTGAAGCACATAAAGCACTATGTTGGATTCACAATGGCAAGCAT
AAAAAACGAAACTATCCGGATCAAAGGATAATAAAAACAATCGAATCAATTAATTTATCA
CATCAGTTTTCCAGATTAATTATAACTACTTGTCCAGGATAGAGATTTAGAGTGAAAAAA
ACATTCAGATTTGTGAACATAAAACGCCAGAATAGGGAAGATGTAAACTAGGATACAAAT
CTGTATAAAATAGTGCACTTTTTTCGGCCTTGTCTTGATCTGGCAAGAAAAACACGGAGC
GTGATTCCTAATAAATTTCGGGGCCAATAATAGAAACGATAACGGAAGGGGGAAAGTA
>comp440_c1_seq1 len=665 path=[1553:0-664]
CGATGGAGAGAGCAATGGTTACTCTGATCCAGAAATTAAAAATCCAATGCTTATGGTAGT
TCCGGTGGTGTGGTGCTCCTATTGAGTACCAGGAAATTAAGGCCCTTGATAATGTTCAGC
AAATGGCATATAAAATTTACCAATGCTATGCTTTTCTACGTGGTTGGAATTGGAATGAAG
AACCTCTTGCTAGAATATCAGCAAGATGAAAACTGCTAATTGTTCTTTCCCTCAGGCTTT
TTCTGTGAAAGAGGGGAAAATATGAAAGGAATGAATATTGGCTATGGATCTAGATACCAT
ACTTGCATTGATCCATTGCCAAATTTCACTCCTTTTCTTTTCTTTCCCGCCACATTTTTA
ATGCTAGCCTATCTAGCATATTGTATTGGCTTTGAGGTTCTGTTAGGATTGATGGGCAAA
AGTAGTACTAACTGTTATTATTTTGGGGAAATGATCAAACATTAACAAACAGTGTCATAA
AGTGTAAACTTAAGTTAAAGAAGAGCCTGCCTGTCATGCTTGGTTGGGACTTATGTCATA
CTCATATCTGATAAATTACCAAATAGTCTTAAACCTTAATTCGCAGAAAATATGGTGAGC
TATTGTTTTTATATTTCAGCAATCCTTTGGATTGGAGGAGTTTGGAGGAGGAGGGAGGGG
AGGGG
>comp442_c0_seq1 len=510 path=[1:0-509]
TGACCCAAGTTTGGTTCCTCCTATCCAGTAGTACCATGGTGCACTTGAAGAATTGGCGAC
TAGTTTAGCGGGAACGGTAATCCGGTCCATTTCATCTTGAGATAGGATGGTGGCTAAATT
CCCTCGTCTCTCCTTGCAGTAAATGAGTGCTTCGTGCCACGACATCTGAATTGTGACGAC
ATCATACGTTTTAGGTCGTTTTCGGACTCGCCACTTCCCTGGGTAAGAATTTTTTTGATT
TTTCGCAGAAGCCGACAGAAAACTGAAGATGGCTTGTATTTCTTTCGGGTCTCCAGCAAT
TGTCATTTCGGTGACATTGTCCCGTTTAATTTGATGGTCTTCGTTGGCTGTTGTTTTCGA
AAGAATCTTCACTTCTCTTGAGCGCCTCGCTGAGCCTTGCCCTCCCACGGCAGCAGCCAC
CAACATCAGACCAACGCTGAGGTAGTTGACATTCATTTCAGACGTAACTAGGAAATATCA
CGCACAGACAGGCTCACTCGACGACGATCG
>comp442_c1_seq1 len=529 path=[975:0-93 1069:94-117 1093:118-528]
TAAAATTGAGGCAAATTCCCCATTTCAAAACTTAGAACATAGCTGAATTATTCTATGAAT
GTCTATCGCCATCGACATCCAGAGCCAAGTAGGGTCCGTATTCACAGATCGGATAGCGCC
TGCCTCTGCAGTCGAGATTGATCCACCCCCATTTCTCATTTTTCTGGTAAAGTTGCATGC
AGTCGGCTCCGTCATCCGAAGTGGGATAACCATCGCGCCAATTGTAGTAGGAGAACGTTT
GACCATCCGAGAACCAATAGTAACCTCTGTATGACCCAAGTTTGGTCCCTCCTATCCAGA
AGTACCATGGATCACTTGAAGAATTGGCGACTAATTTAGCGGGAGCAGCGATGCGGTCCA
TATCGCCTTGAGACAGGATCGTCGCCAAATTTCCTCGTCTCTCCTTGCAGTATATTAGCG
CTTCAAACCACGACATCTCAATTGTGATGACCTCATATGTTTTTGGTTTATGTGTGATGA
GGTCTGTCAAGCCGTTTTCCTGAGAGAGAACCAAGTTATCAACGAGGAA
>comp443_c0_seq1 len=539 path=[399:0-538]
AAAATAAAAAAAATGCTTGATAACTAAGCACGATATCGGTACCCATGAAAAAAAGCTGGG
TACAGTAGCATCTCCATGTTCCATGACAATTACTTTTAAAGAAATAATAGGCCAGAAGAA
GAAATTGTCTTGTCAATGTTAAATTCGCCACCTAGAAAGTCAATCGCAAAATAAGCAACC
AAGTGGCTCAGTAGTGACACGTGAAAACTCAGGTGTTAAGAGAACAACTAAAGGCTCATA
CGTATGTTATCATGACTGGTAAACGCTAGGGAGAATAAAGCATTCAGAACCAAAGCTCCA
AATAGAGGTGTAACGTTGTGTGTTCTACAAGTTTAAGACCAACAACATTTTTACAAGTAC
AACAGACCAAATTCACTTGTTAGATAAACTTCACAGGTGAAGAATAAATTATTAAAAATC
AACACCTGGCACTTCTCCAACAAATTAGAAGCCAGCCTACGTATTCAAATGGATGTGTGT
ACAAACCTAGGTGATGAGATAACATACGTATGAAAATGACATCTCCTTAGACATTCTAG
>comp444_c0_seq1 len=316 path=[1085:0-315]
GTTTTTTTTTTTGGTATGATGGGCACTGTTCACGCTGCTGTGGTGGTACTGTTCAAAGTT
CGAAGTAGCTACTATTTTTGGCAGGTTGTACTTGTAGTTGTAGGCCTTTGCTTCTTTTAT
GGAGGTCCAGTTATAAAGGGTTTTTTGGGCCTTTAATTTTCTGTCTTCGGTTCCAGCATT
TATTTTTTGTGGCTTATTCTCAAGGTGGTCAAAGGCGAAAGGCGCTAGGGGGTGTTAATG
CTTGAGGCGAGAGGCGCCTAAAAGTGCACGCCTTACTAAAGAAAGGCTTTAGCATTAGAA
AAAGAAAACAGTAAAA
>comp444_c1_seq1 len=565 path=[543:0-564]
ATTTTAAATACCTTAAAAGGTTTTGAAATCTACAATTTAGGTTAAATGAAATCACATGAC
GTAAATGTGTATAGTGCTTTATCCAATGTTGAAATAATGTCATCAACAAAATCAGTGGTA
ACAGATTACATATGGCAATTTGGGCCAGGATTACATAACTTGGAATGAAATTGGTTGAAA
CTGTAACAACCAATTTGACACAAGTGATTACATAAGGACTCAAAGTGAAACTGAAGGTGA
ATTGGAGGGACCAGAATAGTAATTTAGCTTCTTTTGGAGTACTGCTATTTTCACACTGGT
TGTTGCACATGACTTCTCTCCTACTTTGGTTACCATTGATTTAAATACAAAATTATTAAT
GTAAGTAAAATTAAGATACTGCATGTGAGAGGAGGTGCGAAATCATTGTGCAACAACTAG
TGTACAAATAGCATTACTTGATGGAAATCAATTTAAAGTGTATAGGCGCAACAAGAAGGA
GCATATATATGAACCCCCAACACTAGTTTGGTGGGATAATGGTAAAGCATCTCTGTTTGG
GAGTTAAAGTGAGTTTTTTTTTTTG
>comp445_c0_seq1 len=497 path=[475:0-36 512:37-496]
GCAATGCCCACTAAAGTCTCTCTAAAGCAACAAAAAATATCAGATGTGAAAATACATGAT
ACTCTGGTTAAAAAAATCATAACTGCTTTTTATAAACAGAAGATACTAATGTGCAATACA
TCGCCTCGTATAAGGGGTTAAAATGGATCAGGTCACTAAAAACAACCTGTCAACAATCCC
AATAATTTCCCAATGCCCTATAAAGATGAAACGGGGAAGAACTTAAATATAAAACCAAAG
AACAAGCATTACTGATGCCTCAGGACAATGGATAGTTCGAAAGAATCGATTTTCTGAAAC
ATGTATGACAAAATCATAAGTTATTCGGGAGACTTCAATCAAAACAATGATGCAGCATAT
AATTAAATACAGTATGGGTTTAACATACAAGTTCACTCTTCACTCTGGTTATGGCAAAAG
CAAGGATTAAAGTAACATCCACGTAAAACAAAGGTATAAACCTCACATGGACTACTTACC
TATGGTAACACCAGTTT
>comp446_c0_seq1 len=957 path=[1371:0-535 20:536-956]
CGACGCGATCGGGTCGAACCGAATTTTTTCGCTCAGTTCAGTCCGCTAGTTTCGCTGTGG
TGACACCTACGAAAAATTTTCTTAGTGGATTCCGCCATAAAACCCATTGAGCAAATATGT
CGGCCAAAGCAATCAGAGAAGCGACCGGTAAGGATCTCATCAACCGAAACTTGTGCACTT
CCGCCCTCGCCAAATGCCGTTTCGCGTCCGTCACAGAAACGACGAACTGGAGGGACCTCG
TCGACGAGAACCCTTGGCTCAAAACTCAACCTCTCGTAGTGAAACCGGATCAACTCATCA
AAAGGCGCGGCAAACTCGGCCTCATCAAAGTCAACACGAATCTCGCCGGAGCTGAGCAAT
GGATCAAAGAACGGATGAACAAAGACCAAGAGGTGGGGAAAGCCAAGGGAAAACTTCGGA
ACTTCATCATCGAACCTTTCGTTGCCCACAAGCCCGCGGAAGAGGCCTACGTGTGCATAT
ATTCGCACAGGAAAGCCGACACCATCTTGTTCCATCACGAAGGTGGAGTCGACATCGGCG
ACGTCGACGCGAAAGCTCTCAAACTGGAGGTCCCCATCGACGGCTCCGTCACTGCTGAAG
AGATCAAAGCGAAACTTCTCGGGAAAATACCTGCTGCTAAACAATCAATTGTGGCCACTT
TCATAGCCTCGCTTTACAAAATGTACGCCGACCTCTATTTCACGTACCTGGAAGTCAACC
CACTGGTCATCACAGACGATTCCATATACATTCTGGACTTGGCAGCGAAACTAGACGCCA
CAGCTGACTTTGTTTGTCGGTCCAAATGGGGTGAGATCGATTATCCTCCTCCTTTCGGAA
GGGACGCCCTTCCTGAGGAAGCTTACATCGCTGATTTGGACGCCAAAAGCGGAGCTTCTT
TGAAGCTGACGATATTGAACAAGAAAGGAAGAATATGGACCATGGTTGCTGGTGGAG
>comp448_c0_seq1 len=654 path=[632:0-653]
TTTGGCCTTGGAAAAACAAACCAGGACCGGTGCCGACATGGTTTCAACCGGCCGCGTTCT
CGTCGCCATCGTCCAAATTTGTTTCGACGCCAAAAACTGGGTCGCCCTCAACGAGCAGAT
CGTCCTTCTGTCCAAAAGGCGGTCCCAATTGAAGCAAGCGGTCGCCAAAATGGTCCAAGA
ATGCTGCGAGTACGTCGATAAAATGCCCACCAAGGATACTCAGCTGAAGCTGATTGAGAC
CCTGAGAACTGTGACTGAAGGAAAGATATACGTCGAAGTCGAACGTGCACGACTCACCCA
TAAACTTGCCAAGATGAAAGAAGTCGAAGGCGACATCAACGAGGCCGCTAATATAATGCA
AGAACTCCAAGTAGAGACCTACGGTTCTATGGACAAGAGAGAGAAGGTTGAATTGATTCT
GGAGCAAATGAGGCTTTGTTTAGCGAAGAAAGATTACACCCGGACTCAGATCATTTCCAA
GAAAATCAACACAAAGTTCTTTGAAGAAGCTGACGCTCAACCCCTTAAACTCAAATTTTA
CAGGTTGATGATCCAGGTTGACCAACACGAAGGACAATATTTGGCCACTTGCCGCCACTT
CAGGGCTCTTCTCGCCACGACGTCGGTCCAGGAAGACAACGCTCAGTGCCAGGA
>comp457_c0_seq1 len=382 path=[1:0-381]
GTGAAAGTTTAAGTGAATGAAAGACTGGTTTTCAATTCAAGGCCTAAGTAAACTACCAAC
CTGAAGAGACATTTGAACTTGAAATTCTCTTATTTATTCAGTTTTTCTGTCTCTTCAGGA
TGAATTTTTGCATCTACAATACTATGATGGCTTGGGTGGTGGCATCTAAACCAAATTTGG
TTGGATCAGTAGGCTCATATACCATTTACCATCTCAAGTCTGAAGCTTACGCTTATCCTC
AATCTTCAATATACTGCAGCATAAGAAGGGGGGAAGCACAATGGAGAGGCACACATTATT
CGTACGTGGAATACACCTCGTAGGGTTGAATGCGACCATATATATCTTTGATATAGCTAA
TGTTATTGGAATTGGTATTATG
>comp458_c0_seq1 len=560 path=[538:0-559]
AAAACTTGTAGTTAAAGCCTGTCCAGTGTTGTCCCCTTAAACTTTTCACCGCAGTAATAC
GGTTTGAAACTTGAAACTCATGCATTGGCTTGACTGAGCAAACCATAAAAGGGGAGGATG
TGGTTAGGTGGTCAGGTTGAGGTGGTCATCTTGGTCATTTCACCATTCACTCCACATTTT
GAATTACTCTGATTATCATGATTCTTGCCCACCTCCCGGCTGTAAGTTCCTTGTCATTTT
TTGACACAATCAATTACCTTCGTCACAAGTGAATTGGGTAAGCTTTATGAAATAATGAAA
TATATAAAAAAAAAGTAAGAAGAAAAAAAAAACTAATACTTAGGGTCAGTTCATGATTCA
AAAGGGCGAGTTTATGGATCAATTTTATTTTTTATTTTCGCTGCCCATCGATTTTCTATG
AGTTACATGTCTTTCCAATTTCATAAAAGAAATCTCAAAACAAAATAGGATTAATTAGAG
CATTTTTGGAACACTCGTTGAGACAGTAATATTGTATGTTCCATTACATTGAGATTAGGG
TTTTCACTTTTAGAATGGAT
>comp461_c0_seq1 len=420 path=[1:0-419]
GACCTAAAACAAAGGAAAATGTAGGTATTTGGTAAAAAGTGCATACTAGGTCTCATGATT
CTTTGAAAATTATTCTCTGATTCAACAAGCATGCATCAGCAAACCAATACCACCAAATAT
TTGCATCCCTCTCTCCAGGTCAATAATGAGCAACAAGGAATAAAATTATAATACATCAAC
TATGAGCAATAAACTAATTGTGATCCAGACTGCCATATTTGTACAAAAGGAACACATAAG
AGTATTTTTTAGAACGGGTATAAAATCTATCATCAATCCCAGAGACCCAAGTAGTTCACA
GCTAACATTTGCAAAACCCCAGATACACTTGGTTTTAGTTAGGCAACCATCAGCCTTGAG
AAAACCTACTAGCGAATAGCTAATATTAAAATTTACAAGTATAACCCGTAGGTAACATTT
>comp462_c1_seq1 len=441 path=[555:0-440]
ACTTTGGCTCCAAGATTTCCTCTAACGGTCACCAAATTTCCAATATCACCCAGTGCTCTG
AGATTCCTTCCCTCCTCCAACAACTGCCTAACCAGTGAGATTCATTCACCCAACAAAAAC
CCATCAAAAGGCCAATTTGCTTGTGGGTTCTAAAAAGATTAAGATGGGAGTAAACCCAGA
AACAAACTTGTCTTTGATTAAGCAAATTTGTAAATCCCAGTTCTTCCAATCTTTCAGTAA
CTAAGCATAAACACAGGAAATAGAAATCAACCCAGAAACTATATCCCTTCCATCACCAAT
TCCAATCTTACAGCGAAGCTGATTTGATCCAAAACTCCCCAAAAGTAAAAGCAGAGAGAA
ACAAAATTTGAATGCCAATGAGAGAAGGCAAAAAATAGAAAAGGAGAAAAGCACAAAACC
TCTAGCATGTTGTTGGATTGG
>comp463_c0_seq1 len=554 path=[532:0-553]
GATAGATTCAATGAATTGGATCAACTTGAAGAATCTGATCCTGTTTCAAGAGACTATTTG
GCGAAGGTTATTCAGTTGAGGGACAGTCACAAGACCATCAGGGACGACTACGACAGGCTG
TACCGACTCGCGATGAGTGGACCCGACAATCAGGAGTTCATTGAGCCCAAGGTCCAAGGG
CTGTGGAAACTCGCTATCACCGCTAATTTCAAGCCTGATGAACTCGAATCTATTAGGTCT
GAACTTCAGCATTACGAGAAAAGGTTACTCAAGCTGCGGAGGATGCACTTGGATGCTGCT
GTGGGACAAGAAAAAAACAAGTTCGCTGCTTACCAACAGAACATCCACTACCCGGGCTCC
TTCAGCGAAGACGAAATTAAACACCAAACTAGGAAAGTTGCCAAAATTCACTTGGACCTC
GAGTCTAAAATCATGGAACGTCACTCAGAACTGTAAAAAATTCCACAAACACACTCCCTC
CCCCCCTCCCGCCTTCGGAAACTGGCGCAGTTTTAAGTTAATTTTTATTCGTACCTAATT
CAATTGTCATGGAA
>comp463_c1_seq1 len=920 path=[1960:0-919]
GAATCTATCCAACTTCTCATCGATTGAGTTTTTAACAGTGTCTGGGTCACCTGCTTCGAC
GGTGTTGAGGATGGAGTAATACTGATCCACTTTCAACTGGTGGTGATCAAACTCTTCTTT
CAGCATGCGGAGTTCTTCTGGAGTAAATCCGGAGCGCTCAGCCTTTTCCCATAACTTGTT
GAGCTTCTTGTCCCTAAACAGGTGGCGGTTGAGGTGATCGTCGACTCGCCCGGAGTAGGA
ATCGTGGGGTTTGAACTGCCTTGCGTCAGGAACATCTTCGAAGTGCTCGAGCAGCCCATA
TACGTTCATAATACTTGAAAGTTTTCTGCGGAGCTCAGCTTCAAGTAATCCATCCTTGTC
GCTGCCTTCCGCTGCTAACCTCTTCCATTGCATTTCTTCCTTGTCAAGGACTTTGAGCTC
TGAGAAAAGGCTTTTAAGTTTTGGCTCTGTGAGTCTCGAAACAGCTTTGGTCCATAGGAG
GTTGAGTTTAGCCATCCTGAATGGTTTGTTCATTTTTCTGATATCGAAAGAGTTGAAATC
ATCGAATTGACTAGGATCGTACGCCGTTTTTCTTTGATAGTCGTCATTGAGATAATCTTT
TTGAGCTTGCTTATAAGTGTCCTTATCCCTTTTATACTGCTCCCTTTGGTAATCTTTTTT
GTAATACTCGTTTGAGTTTTTGTCGTATTTGTTACACGAGACGAAAGCACAAGAAATGAA
CAATAGAACGACAAACAAATGCTTGGAGTTCAACATTGCAGTTTCAGCTTTGAAATACTT
GAGCGTGAAATTATTTTGCCATCCGACTAGGAACTTGATGGACGGTAAGCCGTCGAAATC
CTCACCAACCGAAGAGATAGATGAGATGACAACTCGAATCACTGAGGTTCACACGCCGGA
CGAAAACTGGACACTCGTTT
>comp466_c0_seq1 len=319 path=[1:0-318]
ATAATATATCTTTTCTCACGTACTTATTTGATGGCTGCAAGGTACCATAAAACATAATTA
CATGACAGGTTGATGAAGTCACTCATGGATTAGCAATTAGCATACTCATTGCATCTGAAA
CATGATTTGGTATTCTTGAAAGGACCATGCATTAGCAACAACTGCAAATAAAGTCTAATA
TGCCAATAGATTTTTCTTCCATAGTTCCACTCATTAACCACTTTAACACACCCACACACA
AATGAACATGCAAACAAACAGATTCACTCTCATTCACCCATAACACAACAGCACTCAACA
TACCACCAGATGGTAAGAG
>comp468_c0_seq1 len=806 path=[1246:0-805]
CAGATGTTAATAACAAAATTTTGAGAAGGGGAAACAAAAGCATTTACACAAACAAGCGTA
ATAGTGTGTTGTTAGAAGACCTTTTTCCACCTCATACTCAGCTTTCTAATTATGGCAATG
TTGGGGGTACGGTGGTATTGTTGGTTCTACTTGTTTTTTGCATAATTTTCTTGCAGTTTT
ATAGAAATGAAATCATTCACCAAAGCATTGGCTAATCCCAATACCTCTGCTATCCAACCC
TCCCTCTGTCTTCCTCAACACCCTTTCCCCTTTATGAATTTGTGTTAACTTTTTTTTATT
AATAATAAGGTAAAATATTGAGAATTTTGTATTCTAGTTCTTTGTGTTATTTTATTATTT
GATGTGCTACTGTTAGAGGTTGCTTAACCTATTATGCTGAGGAATAGGATTCCTCTGAAA
TTGCTTATATAAGCTGCATTAATTGTCATTTGAATCCAAAATCTTTCTCTGATGATTGAA
CGTGCTCCTTGTTTTCTCTTCTTTCTCTTTTCTTCTGTCTCTCTCTGCACTACCTTTTTC
GTGCTTTTCTTTCTCTTTTCCTTATTATCTTGTCGTGATCATCTCGTCCTAGATAAATTG
GTATGACAGTCTATGCTTGACCTCTGTTCACTTTCTTTCAAAAATTGTTACCAGAGGGAA
GAGCATTACGCCTTAAATGTAAATGAAGCACCCTGTAAGATGAGCTGACCAATTGAGTAC
TTTGTCAACATCTTGCGTTTTCCTACCTCATTTTAAAATCAGTTTGATTCTATAGCTATC
TAGATTTTGATCATTGTCTATCCGAG
>comp474_c0_seq1 len=457 path=[711:0-456]
AAGGGAGACCAATTAGGCTTGTCACTGTAAGAGATTGTGATGTCATCTAATACTACTTTT
AGATATTCTACAAATCACTTAATCACAGAGATTGAGAAAAGCAGGTTGAAGCAGAGACAA
GGTTTAGGTGACTATAAAAGTCAGTAAGCCACAGGTCACTGTATTAGGAATATGAATACA
ACTTTGGAGTTCTTGTTTGTTATGCATACCAGCACTCATACTTGTCCAATTGTCCATGAT
TTCAATGAATCTGATATTTAGTTTTGATTTAAGCTATTAATATGTTTAATTTCCAACTTC
ACATTCTGAAGTGATTCTACAACTTTGAACACATGGGCTCATATTTATCCTTTTGACTAT
AATATCTGCTTGTTTGTCATTTAGTTCTAAGCGTGAGTTTCCTAGGGGAGACTGGTCAAG
GAGAGAAGTGAGGAATTGTTATGTTATGAGTTATGAG
>comp476_c0_seq1 len=1173 path=[1943:0-188 982:189-1172]
TCCAATGCCTTACTGGGCTTTCGGTATGACTCACTTTTCACTCTCCTATTTTTGTATTGC
ATATTCTATTTAGTATGCATCATATCAGTGATTTGGGTGCCACAGTGCCATTCCTCTTTT
ATATTAGATATTATAGATTGAAAAGTTATCATTTGAGAAAACTGGGGCTTACCAGATGCG
AATACTCAATGATAAAATATTCTTGCCTTAGATAAAGGGAAGGAAACTATTGTTTTCAAA
TCTGTGATTGGGTGGATTCAATGAGTTTCTTGGTGTATGGAGATTATGAGGTCATATCCT
TGGTGTGCATAATGCATTTAAGAATGCTATGAGTCATGGTTTTCCAACTAGCTGTTTTTG
GCTTCAGCATATCTGTGATATTGTATGATGGGGATGTTCTACTTGCTTTTAAAAGTTAGG
TCTGCAAAATTATTTTAAATTCTGAATCTGTTTGTATGATTTGGATTCTGGCAAAGCTTT
TTTAGGTCTAGTTTTAATTGTTCAGTAATTTAAAACCTTTTAGGTCCACATGGAAAGATA
AAGTCACACATTAAAGTTTGAAACTTAACTTTACCATATAAAAAGATTCATCTTTTCTGC
TAAACTTTTGAGTCAAGGAATTTGACCTTTATGATATTGCATGTATAAAGCAATTCGTGG
GTCGTTGTCAAGAACCATCATTGCATACACAATGTCTATCATTTTGTCCTTTTTTTTCTA
TAGGGAGATATCATATTCGTATATGTAATCAGATTATGTGGTTAATAGGACCAACGTTTG
GGAAGATCTTCTTGTCCTTTTACAGATAAGCTTCCTACATAAGTGAAATTAACTGATCAA
TGACTGATCTTTACTACAATGATTGTATTGATTGCTCTCTAGAGGACCAGAAGTCGTACT
AATTAACCTGAGATGGCGATTGCTTTGTGTACCCTAATATGCTAAATATTGCTATCATGT
CTAGGGAACAAGGTTAGCCTTAGGTTAAGGGGAATATACTGTTTAGTATGGACTATTTCC
TATGAAATAATCATGCTATATGTGTGTCTATGTAATATATTTACAGGGTATAGAGAAGGG
TGATATAGGGAGACGGGAGAGGTACCCGTCTATCTTAACCCCTGTTAACTCCTGTTTTGT
TTTATATATTAATAAGTTTAATGGATTGGGTGA
>comp479_c0_seq1 len=302 path=[1:0-301]
GTCTTTAGCTGTGCATCTTCTTTGGGATAAGATAGGTTTACTTCCTTCTTTGTAAGTTGC
TGCTCATCTCTTCTTTAAAGGGGTTTCTTTTTATCTGATATGTAGAGGGATTGGAGAGCT
CTTTTGGACTTTTGTGTATTTTTCACTTATTTTATTTTCCTTTTCCTCCTGTTTTCCTTT
ACTTCTGGAGGATCCCTTATCCCTCTGCCCTGTACTTCTTTTCTCTCTTAAGAAAGTCTT
ATTTTGTCAAAGAAAAAGTTATTACTTAAACAAAAGTTTTTGATTTGCACTCTGAAAGTC
AT
>comp479_c1_seq1 len=447 path=[983:0-446]
GTGAGATTTTCAAAATCCACTACACATCAATTTGCACCATGGGATATTCGACTTACGTGC
TCAAGTGCACATATTATTTCGGACATCACTTGCCCCTAAAATGTCCTGGAAGCTGAGGCA
GCAGAATCTTGTGCCACTGAGAGAGTCTGGTGTGTGGTTTCCTAGTCTTGTTTATGTGTT
CATCTTTTTTCTCTCTCTTGTGTCTCTGCTTTAAACGAGCAAAATAAAAATATTAGCAAA
CAAGAAATGCCACTTTTTTTTTAATATATTTTGGTTGGTAAATGCACGGAGTGTGGATAG
AAAATGAATAATTTCCAATTTCTAATTTGCCCGCTCAGACCTTAGACTGAATTTCAATTT
TCAACTAAAAGCAGAACATGATGGGGTACATCCCAATATTTGAGTAAAAATGCTAGGTTC
TTCGGCCATGAAGTCTTTAGCTGTGCA
>comp480_c0_seq1 len=741 path=[719:0-740]
GTGGGTTGTAGGTAAACTAATCCGTTAAAAACAAAGCGCGCTCGTTCACGTTCCATCAAA
CGAATAAAATAACTTCAGTACCACAATAGGAATTCAGCTATGAAACAGAGACAGTCTTGA
AATCCAGGGATTCTGAGGGGATCAATGGGATTTTGGATACTTCGTGGAACAATGGGTGAC
CGTATTTGGTCTTCACAGTGTTCAGGTTCGGTTTCGATTTGTGGAGGAAAGAATTCATTT
GAATAACAATATCCTTGAAGTCGTCAATTCGGTACCCTGAATAGTATTCCAATGTTTTAG
TCCAATCTTCTCCTTTCATTTTCAGGGCGAGGTACAGGGCTGAAGCTGCCATTTTGGAGT
CGGAGCACTGAATTGTAGCATAGTCCATAAGGCTTGTTTCGAGGATGAATCGAGCGAGAG
TAAGGAGGTTCATTTCGTACTTGCCACACCTAGCATATCGACGAAGGAATCTGTATGAGA
GGGGAATTCCCAGTTGGAAATCGACGCAGCGAAGCATCGCCACTTCCATCTTTAACAGGT
CGTCGGCATTATACAGTCCATCGCACACGTATACGAAGTCATCGAGAGCAGGAGGCAATC
TTTCATCATATTTGCAGGCTATGAAGAGACCAGTCGCACCAATAAGTTGAAGATTCTCTT
TTTTGATCACTTTCTTCGAAAGGTAGAGATCAACAAGTTTAATTCCGAGATACAACGACT
CGTGATTGACCTCAAAATTCT
>comp480_c1_seq1 len=367 path=[1781:0-366]
GTAATGACCAGAAGATCGCTTGCCTGGAAGAGTTTGGAATTGGAAAAGTCTTCTGATAAC
AGTCTGTACGTATCGGCTCTAGAAGACTTAAACCTCGAAGAAAATTCAAAAACCAATAAA
TCTACGAAGAAGGTTGCGAAAACAGTTGTCAAAGTTGAACGTAAACCACCCCCTGGTGTT
CACGATTACGATCAAGAGCAGTTGAAAGATCTCTTCAGCATTTCAAATTATGCCATGGAT
ATTTTCGACTACTTGAAAAGACGAGAGAAAGACTTCAAAGTGGAAGACTACATCCATCGC
CAGAACGATCTCAGTATCACGATGAGAGCTCTTCTCGTAGATTGGATGGTAGAGGTTCAG
GAGAATT
>comp484_c0_seq1 len=527 path=[505:0-526]
CTTTATTAATTATTGTGGTGGATTATGTATTAGTATTAATCCAGTAGTACATTCACTTAT
AAGTAACATAAGTATGTTCTTTAGTTTGATTTCGACATTGAGAACAACGCTTAGGTGGGT
ATTTCTCACTAAGACGATGTACGATGAGGATGACGTACTAGGACAGGACTCTAGTGAATA
CACTCCGGCACGAGTGAGCGGAGGTTCGCCTGGTCTTCAGTGGACCGTCTGCAGCTCCCG
GTCTGGTTGGGCTGACAGCGGCCCGTGTAATATCCAACACTGATCATGCACTCATGTACA
CTTTCTAGCTCCGCGGCTTCCATCACTAGAAGTCGCGGTTTTTGGAGGATTACGATGTAC
GATGTGTAATCGTGCTTGCTGTACTCTAAAGTGTGGTAGCGTTTCTGTTATTCTTGTGAA
GAGATTGTCGGGGAATGTCTGGCGTCGTCACTGCTTGGAGGAGGCCTCTTTCTCGTTCTT
CTGTCGCTTCCTCACGAGGAACCCTCGCACTCCCGCCTGGATCTTGG
>comp485_c0_seq1 len=537 path=[1035:0-536]
CGCAGGTAATGGTTTTATAAGCTTATCACACTTTGTTCTTACAGTTGATTCCCAGAGAGA
ATATTATATGAATAATTTTAACACAAACTTAGTAACTGGACATTGCCGGTTTGGTATTTA
GTGCCGGGAAGGTACAATTGATCGCAATAAGATACCTATCCACCAGCATGTTGACAGGCA
TATTTCAAAAAAATAGACTACTTAGAAGAAAAAACAAAAAAAACAAAAAAACTTATCAGG
TATCTATATTCTCCAAATAATAGTGTGAGATCAAAATAAAAATCACCAACAGTACAGCAT
GGTAGATTCAACATTATATAGCACAGCTACAAGAAATTTATTCATGTGAAAAGAGCATGT
ATGTGTAGATTGACATGTGAACATGCATAAGAAATGTGCTATACACCTGCATGGCCAAAA
AAAAGTGTGCTATGCGCTCAAAGCTAATTATGAGTGCTGCATCAAGGAAGGAAAAAAAAA
CAGTTTGATATTCTCCCTGCTGTCCCTGTGCATCTTTGTTTGTCTGCTAATTTACTG
>comp486_c0_seq1 len=506 path=[1:0-505]
TGCAGCTATTGCGATTGAGACAGGTACTACTTCTAATCATAGAATGCTGAACAGAAATCT
GATATTTCCTTGTATGCATTATGATGTTTTCCAGTTACACCAAACTTTCGTGATATCATA
GTTCAAGGCTATTTTTGTAGAAGAAACTGATAATTTTCTTCAATATGTGCCATTAAGCAA
GGTAGTCCCCTGCCTCTAAAACAGGCCAACAGTGCTATTTTAGGTTTTTGGTAAAACTAT
ATAAATTGAAACAGGCAGCTTTTCAGTTGTTTGTTTGGGAAACAAAAAGAAGAGGGAAAT
AAAGTCAGGGTTGTCAATATTGGCTCCTTTTGCGGCATAGTGGACCTTGGCCGCTCCATG
ATGCTCATAGCGGAGCTCTTCGGTGTAGCGGCATGGAGTGCCAGCGGGCAATAGCAGACA
CCAACAGTGGCCACTTTTCTCTTTATTTTTTAAACATGCCAAAATGTCCCAAACTCCCTT
CTACCATGTCTATTGGCTCTTTCAGA
>comp491_c0_seq1 len=501 path=[479:0-500]
GCTTGTCGTTTTTTACTAAATGAGTCATGTGGATAATGAGCTAATCAAGTCCACAACCTT
TCAAATCTCCTGAGTCAAATGGTCAGAAGCATCAAGTGAACCTAAAAGATTATTATTTCA
ACACATTTTCAAGTTAAAAAAATGGAGAAATATTTATATATGGTGGATATGTACAAACTA
GGAATCATAAATTAATATGAAAAGTAGAATATATGGCATCTTGTTTTATGATACTAAATG
CTCTGTAGCTTAAAAACTGAGGTTCCCCTTGTTCTGGCTCTGCTCTTTGACTAGAAGATC
TGATTTTTAGCCAATCTCTCGTGGATACCTCTTTTCCTTTACACTCTTTGTATCTAAGTG
AATTCTTGATAAATATTGGGTAACCCTTTTACTCCTTAGTGAGAGGTCTTCTAATCCTAC
TTCCAAGGTGCTACAGTAACTGATATCATGATGATAGTCCTTTGTCCAATATCACAGTGA
TAAGGCTTGGTTGTTGTTGTT
>comp492_c0_seq1 len=492 path=[723:0-491]
AACCTATCGGCCTCCAGCCTCCTGCAAATTGTGTCAATTGCAAATCCATTACCCCAATTT
CCTTTACAAAACCACTTCGCAAAAGCCCAAAGATACAAAGCCCAATGTATTCTTGATAAC
TAATAGAGAAGTTTGTTTGTTTTTTTTTTTTCATTGTTTCTATTTTGGTTCTTGTAAATT
GTAAGGGCAACATTATAAGTTACTTATAACCTATTCCACTTCTTTATTATCACTATAATT
TCTAAACAAGGGAAAGAGATTTTTCTCTCTTCTTTTCCTAAACATCCAAATAATATAATA
ACTATTCTTCATTTCTTTCATTACATACCATTTTATATTTTTATAAACCATTTTATTAGG
ATCCACTTTACTCTGTTGTGTCCAAAACTTCCTAACATAGCTTACAAATGCAGAACTGGT
ACAATTGCCGGGAGTAGCAAGAATAGGTATAGAAGAAAGGTGTTTTTACCTGGACGCCAT
GAGCAGGAATAT
>comp493_c0_seq1 len=512 path=[490:0-511]
AGAAAGTAGAAGAAAAGCCCAAGGTATTTTGCGCCCTGCATGATTCCGTGTAGCACTGAT
GTATCTTTTCTGGATGTAGCGTTCTGTATACTTCCAGCATGTACTTGACTGCATATTATC
TAGGTGCAGAAAAAAGAAAATATGATTCTTTCTGATGATCTGATTTTTGTTTGTAGGTAA
TATGCATGGTTAAAAAGATGCTTAGATTGTTTTTGTTCGTTGATGGAGATTTTCCTGGAG
GGGACTGTCTGCAAATTGAATGATGATGTTAAGATTGAATTAGTTATATATGGTGTTTCA
TATGTTAACTATGTCAAGCGTAATTGGATTTGTTAGGATAATGATTGCATAAAATGGATA
TAAAATAACCATAAAGTAAAGATGAGGAAGTTTGTTGATCAGCTAGAACGAGAGAAACGA
TAAAGCTCAAGTTGTGTTCAAGACAGTTGGTTGATCATTAGAGTGCAAGTTATATAATTT
TTTTCCTGATAAAATATAGTGTAAGTTATTTG
>comp494_c0_seq1 len=439 path=[1:0-438]
ATTTTATCAAAAAATTGAAGGTTTGAGGGTATGTAAATAGCTGATCCTAACTAATCTTTA
CTTTTAACAAAATGATTTTTAGCATAGCATTCCCCATATCATCTGTATGCTTTCCATCTC
AAATGTTGTTCACACATCATTTCACAACACTATAATAGGCTTTTCCTTTCTTTCTTCTCT
ATTCTCTTGATGATATAATAATGGTTGTAATAAATCTCAGGATCAGAGCCCTTCCCGAGA
ATTCTAGTCATAAGCCTTAACAATGATCACTATTTTGAATCTGGGATTGCAGCCATGTTT
ATGTATCTATGCCAATGACATAAGTTGGCCTCAAATTGGAAAACAGTTTAGCATACTTAC
GATATGGTTGCTCAATTGGTAAAACGGCATTACTGATAGACCTTTAGCCCAAGTATACAG
GAGGAGGAAGCATAGGCTG
>comp494_c1_seq1 len=852 path=[833:0-851]
CTCAAACCTTCAATTTTTTTGATAAAATAATTCGTTAAAACAAAGAAGTAAAAAGAAATT
GATATTATGTTGATGTAAATGTCATCTACAAAGTTACAGAATCTACAATTTTCTAAAATT
GTGTCATTATAAATAAAAACAATAGATAATAGAAACTACAGTGCCTGTGAAGCCAAAAAT
TAATATTCAAACAACAGAGATGCAGTTCAACAATAACTAAGATGAGTATCTTCCCACACT
TCCCACACCCTGCTCTCCAGCTATTGCAATTATTTAGGGAAGACAAGCTATTAATAATAG
AGAAAAGTACCACTTATGCCATATGTTGAATACTAAATACTGAGCTGATCCTTCTCTCCA
AAACAGGAAAGGTGAACCAAGTTCAATTTTTAGGATTTTTTACCTTATATTATACTTTAC
TTCATCAAACACAACTAAAATCTGGGAGTTTCAAACCAAATTATCATGTGATGCCAAAGA
TCAAAGGCGCCATAGTAAGATAAAAGTTACCTGACGTTCTTCTTCCTCCATTTATGGCAC
ACCAAACAACTTGAGCTTAAACATAACATGCCTATTCACATGTTTTTGGGAAATCTGTTA
TTCCTAGAATTAACACTCAGTTCTAATGAGATCTCGCTCAAACTGAAGCGACTGGCATCA
ATAAAATTTTAGAGGCAATTATGAGTAGTTTAACCAAAATCTATCCTGATTATGGTTAGA
TCCAAGCCTGTGTCATTATTCCACCGTAGGTCCTATATATGATGGGGGGACCAGTTCACA
TATTTACTGCCTTTAGATTAAAAAATATGCAATATATTATTCAAAGGCATTTTGGTAATT
CACAGAATTTGG
>comp495_c0_seq1 len=847 path=[295:0-846]
TTGCTCCATCATGTATATCAATATGCATTAAGCTTTTAGTAATAGGAAATCCGTTCTTGA
CTCTACCATCCTTTGGGGTGGGGGATGGTAATGCTCAATTGCACATATAAGCAGAGTTTT
TTTCTTTTTGGTGGATAAAAGAGCACAGAGAAATATTAGCTGTGCTTGAAATTATATGGC
GCCAAATGTCTTACAAGTCTGCCATTGGTGAGACAAGAATCAAATAATATTATTTTCAAC
TAAATTGTGGCTGATAGAATTTGGATAATTATTTACAAATAGCTAAATATATGTCTGTTG
ACTACCAATGACCCTGCACTTTTCATTTGGTCAGCATCATGAGAACAATACTATTTGAAG
GACTGGTATTTTGTGTTTCTTCCTGGGACATAATTTCCCTAATTGACTTTTGCTGTAGTA
AAGGGTTAAAAGTTGCAGTTATATTTAGGTGATATTGCAATTATGCTTCCTTCAATTGCT
TAGAAGTTGTAATAGGCAAAATTCATTGTACAATAGTAGTAGTAGTGGAGGTGGTGCATG
AGACTGTCGGGAACCAGTTCCATGAATTTTAGGGTTTAGATTTGTGATTTTTTCAAGTGC
TGCATACAAAACTTTTACAGTCACGAACTTATTTTAATTTACTTCTGAAGATGTGACTCC
CAAAACATATCTTAGTCACAGCTCTCAAAATTTTCTGATGTCTTCACTTTTTTATGAATG
GAATAACTGAACTAGACGCTATTGCAATTTCTTAGTTGGATAACTTATAGGTTGGTGTGC
ATTATCCTTCATGATCTTCAAATTAGTTTTATTTTTCTGTGTGAAGCTGTTGATATTAAT
GTTTATG
>comp496_c0_seq1 len=353 path=[475:0-352]
ATGAAGATGTTGAAACTGAGGGACATTTGGTTCAACTTTTTGATTGCCATGGTGAAATTT
CCAATTATAATCCAAAGAGACAAAATTTTATGAACAGCTTCCAGGCCAAGCAACCGATGC
GCTGACAACAAAAAGCCAGTTTGGATGATTCTGGGAACCAAGAGAATTCACGTGCCTCAG
TTACTACTGGTGTTGGAAATCCTTCAGTTTGGATTTCCATTATTAAGAAACTGATGACCT
CGATTGTTAAAAGTCCTGCTGATCCAGAACAAAATAAAAAAGAGGATGATAATAAAACAA
ATACTACTAGTGGACTACAACCTTTGTGTCAAAACTATTGAAGTGAGGACGAT
>comp497_c0_seq1 len=399 path=[505:0-398]
AGATAAATGTCAACGAGTGATTAAGGAAATTTCCCTTTTCCGTTCTTCAAGAGAAACTGG
GATTTTGAACTAGAATTAATTGGTTACAATGCCAGGTTTTCGTAGGTTTATTTGGAAAGT
TTGGATGGCAAAACATAATAAAAGGAAAACGTGTCCTCCCTCTATTCTTTGGGGTAAAAG
ATTGGAGTCTGTTTTAAAGCTTTTCTCTTTTGGATGGAAGAATTTTTATTATTTTTTTAA
AATTCATTGGGGGATTTTGTAACTTGTGTTGCATATCATCTCCATTTGGGGAAGTGATGG
AACATGTCTAACATGCTTAAGTGCTTAACAAATGCAACTAAATCTGTTTCTTTTGAAGTT
TTCATGAGTAAATATGATAAATTCCCTATGGTCGGTGCT
>comp498_c0_seq1 len=358 path=[1340:0-357]
TGACCAGCTGTATCCCATATTTGAAGTTTTATGTACTTGCTGTCAATCGTTATCATTCGT
GCACCGAATTCGACACCGATAGTGAGATCATGTACGGGCTGAAACCTCTTATCAGTGAAT
TGTAGGAGAAGGCAGGACTTTCCAACACCTGTGTCTCCGATGATAATATACTTGAACAAA
TAGGCGTAAGACATGATGAAAGTTGAGATTGGGATGACAGGTAAGATCAGTTGTTAACTC
CAGTAAGTGAAACTCGTTCAAAACTAACCAGGTGTATTCCCGTGGTTTACTTGGAATGAA
TAAATTCTGGGCGCTTGCAAATCGTATAATAAACACAAAGAACCAAGCTCAACTGCGA
>comp498_c1_seq1 len=525 path=[503:0-524]
GGGGTTTCAAATTATATAGAACAAGGGAGGGGACAACAGTTGAGAGAATGCTGATTTATT
TAACAGCACCCCGAAGGTTGAGACGGAGGCTTGGAACCCGGAGAAAGATTACTGTTGCTA
GGAGAGTGCTGAGGACCTATTTTGATGCCATTTGCCTCGTTGTTGATGTCAAACACTCCT
TCCTGAATCTTTTCGTATATCTCCTTAGCAGTGTTTATGAAAGCTTCTTCCACATTAGCA
GCAGTTTTTGCTGATGTTTCCATGAAAATCAAGCCATGTTCTCGAGCAAAAGCTTCTCCT
TCTTCTTTTTTCACTTCCCTTCTTGACTCAAGATCACTCTTGTTTCCAATCAGCATTATC
ACCATATTGGAATTTGAATGCTGCCTAGCATCATCCAGCCATGTAGTGAGGTGATTGAAT
GTTTCTCTCCTTGTAATGTCATAGACCAGCAACGCTCCAGCAGCTCCTCTGTAATATGAT
CTTGTAATGGAGCGGAAAGCTTCTTGACCAGCTGTATCCCATATT
>comp499_c0_seq1 len=334 path=[269:0-333]
AATGCTGGCAGGATAGATTACTTATACTACCTCATAGCAGGGTTGGCAGCCCTGAACTTG
ATTTATTTTCTGTATGTTGCTCAAAGATATCATTACATGGGAAGTGTAGACCTCCAAGAT
AAAGCTCATGATGTGGAGTTAGGTTCACATCAGCCTAAGGAGAATTAGATTACTATACAG
CTACGTATGAAGATTCTAAATAAATTGAAAAAATGGCTAGATATGCCTTTTCCCCCCCTT
ATCTTTTCTTTGGAATTTGGGCCATGTAACCAGGATCACTCATTCAGTGTCTTCAAATAT
CATCTGATGATATTTTAAAGAAGTTGTTATGGAT
>comp500_c0_seq1 len=306 path=[235:0-305]
GCAATTTCCAAATAAAACAAACTATTCCCATTTCCCATTCATAACAAAGTTAATGAAACA
TTTTTCTCAGGAACGAACAACACTCAAGATGACACAAATCGCAAGTTCATTGAGTTTGAT
GAGCACTATTAACCTTCTCTACTATTTGAAACCGTCAAACTTCCTAGAGAACAATAACTC
CATATGCAATAAGTTTTGAGCCCCCCACAACTATAAGTCAATAATAAAACAAATAATCTA
CTCTAGAATAAGCAGCAAATAAGCTTAAACAGTTAAACCTCGTCTACAATCACATACCAC
AAAAAA
>comp501_c0_seq1 len=405 path=[1427:0-404]
CTGCCTTCTGTTTTCTGCAAGAACCGAAAATGGTGGCCACTGCTCCAAAACCCTCATTTT
TTATTATCCCTTCTTCTTCTTCTTGTTCACCCTCTAACACGCCGAAGGAGATTCTCAGAT
TCACCCTACCCTTTTCCTCTATTCCCAAGAACCCCTCTCAACCTCGTTTTCTTCGGATCA
CCAGCTCCTTCTCCAATTACTCAAGTCCCGAACCATCTGCACCCCACGCCACCACCGTTC
CCGTCCCCACCACCACCACCACCACTGCCTCCGACGCTTTCGTTTCCCGGTTTGCCGCCG
GTGAGGCTAGAACAGGCGCCGATATCATCGTTGAAGCTCTCGAACGCCAAGGTGTCACCA
ATGTCTTCGCTTACCCTGGAGGTGCTTCAATGGAGATCCACCAAG
>comp501_c1_seq1 len=545 path=[523:0-544]
CGCGCTCCAACATCATCCGAAACATCCTTCCCCGCCACGAGCAAGGTGGGGTTTTTGCAG
CCGAGGGTTACGCTCGCTCTTCTGGCCTCCCTGGTGTCTGCATTGCCACTTCTGGCCCTG
GTGCCACCAATCTGGTTAGTGGCCTTGCCGATGCTTTGCTTGATAGCGTGCCCCTCGTCG
CCATCACAGGGCAAGTTCCGCGAAGGATGATTGGTATTGATGCGTTCCAGGAGACTCCCA
TTGTTTTGGTGACAAGATCTATCACGAAGCATAACTATCTTGTTCTTGACGTAGATGATA
TTCCTAGAATTGTGAAGGAGGCATTTTTCTTAGCAACTTCGGGGAGACCAGGCCCGGTAC
TGATTGATATACCAAAAGATATACAACAACAGCTTGCGGTTCCAAACTGGGACCAACCAA
TGATCAAGTTGGCTGCGTACATGTCTAGGTTGCCCAAGTCCCCAGATGAGACTCAGTTAG
AGCATATTGTGAGGTTGATATTGGAATCCAAGAAACCGGTTTTGTATGTTGGTGGTGGTT
GTTTG
>comp502_c0_seq1 len=752 path=[199:0-751]
ATGCTATACTCAAGTGACTAAGCAAATAAATAGAAGTACCAATTAACTTCATAAAGATAG
ATTATTTCTCTAAAATAAACCATTTGAAGAATCTAATTACCATATATGAAACCTTAAGGC
CAAATGACTTCCCAAGTTTGGTCACTCCTTGAGGAGATTTAGGATTCTTGTGCTAATCAT
CTATGCCAAATAATTGAAATGACAGATCCAGAAGAGTATCGGTTACTAACTACTAAGCTT
AATCAGTTATAAATTTCACACACTAGGCTTATCAGTTATACTTTAATCAGTGTCAACTTA
ACTTCTGAAATTACACTCAGCTTCTAAATATTAGTAGAAATAATTTTAGAAAAGGCTCTG
ACTGAATACAGGAAGAAATATTGTGAGTAAACTTACTCAATTTTGTGAAGCTAAATCTTC
TAGATACGTTAACAGAGCCTAACAATCACATCGACCATTCTATGGCTGAAGACTATTTAT
ACAGGTAGAAATATCCAAAGCCTAAGTCCAATGAACACAAACCTCAAGTACCATTGTTAA
TAATGAATCCTACTTCAGATTCAATTACATATAGAGTGTCTTGTATGTTATATTAACAAA
ATAAACCGGCCCCTAAAACACTGATTTGCATAATGTTTTCTTTTCTGCATTCTTTTCTTT
CTCACACGCAATGCAATTGATGAGGAAATTGTCACTCTATATCAAGTTTAGCACTGGATT
AACAACTTCTACGTTCTACTAATTTATGAATA
>comp503_c0_seq1 len=542 path=[1:0-541]
GGGAAATCCTTAAATTAACAAAAATAACATATTTTCCGTCTCCATCTAGATCAAAAACTT
TGTGTTTGGACTTTTGATGCTCAACCCGCTCCAGGAACTCCTCTACTATAGTTCTACGTC
ACTCAAGACGTTGTTGCTTTGGGACTTCCTTTATGTCTTGATATTGGCCACGCTGTGCAG
AGGCGCTTTGCCTAAGGGGACAATGCTTTAGGCATCATTCCTTAGTTGGGTTTCTTCCCA
GTTTCATTAAGGCAGCATATTACATTTCTCTTGTCAAGTCAGGTATTTTTCTTAACTCTA
ATAGTCCGTTTGGGACTTATTATGCTCAAGTAATATTTAATCTGAAACATTAAGCCCCTG
CTTATTCAAAAAATAAATAAAATTGCATGACATACATGTCAACCCCAACAAACAAGGAAA
GGTTACTAACTAGATTGATTGCACCTATCTAACTGCACGAAGGAAGCTACCTAGCATACA
TGTAAGACATGAAAAGGTGTACAATCTTTTTATCACCTGCACTCAATCAGTCAATCATAC
CA
>comp504_c0_seq1 len=544 path=[522:0-543]
GACCCATAAGAAACCTGGTAAAATTGAAAGAGAAGAATAATTTGATCCTGAAAACTTATG
CATAGCATTTAGAACGAAGAATTGGGATCTAAAGAAAATTGAGAACTACTGGAAGACTGA
TAATTTCCATGGATTGTCATTTGTAGTTTACCTTCAATAAATAATAATCTAGATGCCACT
TGCCGCTTGGGCTTAGCTCAAGTGGTTGGGGTGGGGTTTGGATAGAGTCATTGGTTCCAC
GCCTTGTAAACCTAAAAAGTAACAACCGTAATCTAGATGAGGAATTGAAATTTGATGTAT
CTACATGCTGCCTTAGGGTAAAATAAAGATGTAAAAAGAAAATTTCCATGTTGTCAGCTT
TTATATGTAAAGAAAAAACTGTGATACATCTCTGATTTGGTAATTCTAGACCTCATTTCA
CTTGTATAATGATATAACAATAGTTCCATATCTGGAGTTTCTGCAATTCCTGGGATAGTG
AAAGTCAACACCTACTATAGGATTGAGAAACCTGAAATCTAGGAAAACTTTTTACAAGTC
TTGG
>comp506_c0_seq1 len=372 path=[534:0-210 139:211-371]
AAACAAGATAGAAATACAAAATTCAAAACAGTTCAAAAGAGTCTAGTAAGGCCATACAGA
GGATTTCCCCACTCTTGTGTAACTCAAATTAAATATGTTCCTTATGCCTATAATCCCAAA
TACCAAGCTAATATAAGATACAGCACGCAACCATCTGAACTGACAACGATGTTAAGTTCT
CCGGTGAACATGCAAAATAAGAGTTGGATTAAAAATGAGGACATATTGCTGTAGATCTAA
TATTTCTCATACAATAGACATAGTAAAACGGACATAAAGTTGTCTCCAACTACATGGAAA
GTCTTCAGCGAAAGAAATACCAAAAATACTTCTAAGGAGGAGTGTGTTATATATGAAACT
TGGTACAAGTAT
>comp507_c0_seq1 len=773 path=[313:0-772]
ATGGAATTGTGATTTGACTGATTTCTTTTGTTTGCTTAATTTGTTTCCATAAACTCTTCT
GAATTGCTTTGAAATTGAGTTACTAGGAAGGTCCAGTGATTTTTAGTTTCTGTTGGATTT
GATATTAAGTTAGTTAACACTATTGGAGGATTCGGCATCCTCAACCTTCTCTCCTGCTTG
AATGACTTCTAACAATGGCTTCGTCATTTGGAACTTCTTTGACTTCCTCTTATTTTTTTT
TCCTTTTATCTATCTTACACTTATCTAATAAGGAAAATGCTAAACTGCCTGAATTTTTAT
TAGTGAAATCACTTACCCATGCATTGTGTCCATTAGATAATGAAAATTAGCTACATATTT
CAACCACTTGTATTTTTTCTTTTACTCCTCATTACCACATGAATTTTGGTGATATTTGCA
GTTCAATTTGTTGTTGCATGTAACAATGCTCATCTAATAATCTAACTACTGAAAATAAGA
TGATTTGATCCTTAAGTTTTCTCTTGTATGTCTCTTTGCACCTTGGTAGAGTGAATGGTA
AAATTTTGGGAAATACTAGTGTCCATGTCCTTTGGTTTGATTCAGATAATATTTATCTAT
GGCCTCCAAGAAGAAAATGTTTTGTCTAGCTTTGCAATTACTATTGTATTACTGCTATAT
TGATGTGATGTGATTACTCATTAAGCTCTTACAAAAGAATAATTTGGTCCAGAGGCTTAC
TTCTTGATGTTATGTATATTGGCCTTTTTTTTTGGTCAACATACTTGGTTAGA
>comp508_c0_seq1 len=407 path=[1:0-406]
GAGTTTTGAGAATGAGATGATAAGGTGAAGTACTTATGTTTGGGAAGTAATTGGAGATGT
TTAGATACGGTAGGTAGAGCTGTAAAGCAACCAAAACAGCTCAATACCTATAAAGCTGAT
ATGCGCACTTTTCATTCATCAAACTCAAGACTATTTAAGTTGGAAAATCAAAGAGTCACA
TAAACGTTTCAGTGTGTGTGTTTCTCAAAACACCTCCTCTTTATTCTCTGCTTCTTTGTT
TGATAGTTGTGGACTTGTGGTTTATTGACTCTTGCCTAAGATGATTTTTTCATCGAGAAG
AGCATTATTAGATGTGTATTGTGGTCAAATAATATGCTGGAAGCCCTGCTCTTAAGTGTT
ACCATTTGTTTTTACCTTGGTTTAGGGGAATGAAAATCATATGACCA
>comp508_c1_seq1 len=545 path=[769:0-544]
AAAACGATTCCTCAAAAACTTTGGTATTGTTATTTAAAATTACTGATTAGCATATGCTTT
GCACACTGGTGTAATCAGTTCAATGGTTGCTTGCTCAATAGCTACTAATTTCATGCTACC
ATCCACTGTTGAAGTTTGTGATACTTTTTTTTTTTTGGTTTGTATTATCATGATAATAGT
AATACCTCAGTAGATTCTCAATATGTTTTTTGAACAGAACCAATATAGGTTTGCTTGATG
TGTGGAAATATAAGTTGAGTCTTTAGAGCTGTTTTTTTTTTCTTCTTAATACATTGAGAA
TTTGCTACTACTACTCTGATCCTAGGATCTCTAGCCAATTGCCCACTCACCTCAACCACG
TGAGCTAAGCGCATGTGGCTGAGTCTTTAGAATTTAAACTTGAAGCCTTGAGTGATGTCT
TCCTCATTATTGCTGGGTCTCCTTCCCATGAACAATCTGATTTGAATTCAGTATAATGAA
GAATTGTTCTGTCAATGACCCATGTCTACAATCCTAGTATCTGAGTTTTGAGAATGAGAT
GATAA
>comp510_c0_seq1 len=354 path=[2284:0-353]
TTGAACTGAGACACAAGCTTTTTGAGGCAATACTCTGCAACATCGATTCGGTGGCAGTCC
AGAGCTCCAATACAAACTTGCTCCAAAACTTGAAACTGTTCGTCACCCAACTTGTGAACT
TTGTCTTTCAAAGTGCTCTCCCATATTTCCACCAGCTCTTGGCTCTTCCTTGCGTTGTCT
TCCCTCCATTTTCTGACTAGATCTCTCGCTTCTGACCAATGCATGGTGTGGCGATGGAAT
GTGCGCGAAAAGTACGGAAAAACTATCAAAGTTAGGATGAATTGACTAAATTCACGTTTA
TAACGAAAGATTCATAATCGAATTTTCATTTAGTGGAAAGCAGGTTATTTGAGG
>comp510_c1_seq1 len=999 path=[977:0-998]
AAAAAGCTTGTGTCTCAGTTCAAAGACAGTTCAAGGATTCTCCTTCTCAGCGCAATGGAA
TTTGAAGCAGTTGAAATGTATGATGATGCTATTGAAATTCTGGACACAATGATCAAACGA
GACGAAACAAACCCAGCACCTAGGAAGCGCAAGATTGCCATACTGAGATCACGAGGAAGG
ACGATTGAAGCAATCAAAGCATTAACAGACTACTTGAAAAGATTCGCCATCGACCAGGAA
GCTTGGCAAGAGCTCTGTGATTTATACTTGATAGAACAGGAATATGGAAAAGCAGCGTTT
TGCATGGAGGAATTGATTCTACACAATCCACACAACCACTTATTTCATGAGAGACTAGCT
GAAATTCGATACACTCAGGGAGGGTTCGATAATTTGGAATCGGCTCGCTCATATTACTGC
CAAGCTTTGAAACTGAATCGCAACAATATGCGAGCACTTTTCGGGTTGTATTTGACGGCG
TACAGTATAGCGACTTCGCAAAAATGCGTATCGGCCAAAAAGAAAGAAGCTCATTCTTTG
ATGTCTTGGGCAATGAAGAGGATCAGTCAAAGGTACAAGGAAACAGCAGCGGATAAAAGC
CAAATCGACGCTCTCGAAGGCCTCATGGGATCACTTCAGCTCGGCTCGAACTCAAATTTA
TGATGTCAAATCCCTGAACGCATAAGTTTAAATTGTTTTGTTTTACCTTTGTTATGTTAG
ACAATTTCAAGCATTTTGTTGGTTGTTACGACGGTTTCAAGCTAGTTGATTACTTCCCTA
TGTATAGCATAATTTTGTAATTTTATCACTCAAATCTACCGATTGAAAGAGCATTTACAA
AAAAAATATTTATATGAATAATGAACAATATCATGTAGACGGCCAACTACCTACCACTTG
CATTGGAGAGGGTTTCGTGTACAAAAAGAAAAGAAAAAGTGCATTCGTGTATCTATGCAG
TACTTTTCTTTGGTTTGAATGCTTCTGTGTCATTATGAG
>comp511_c0_seq1 len=448 path=[854:0-447]
GCATGTTTTTGTTTTAGTCTTTTAATCTAATATTTTTTGTCCTTTGGCTTTGTTCAAAAA
AAATTATGGGCTTATTGATCACTATATGACCTTCACTGCCAGTTATCTATGATATTTGTT
GCAGATGATATGATCATCAACTCTGTGTTTGTGTGCATACACAACATATGAAATGTGGCA
GAGTACTTACTGCATTCTTTAAGCAATCTAAGTTGTAACTATAGAGTGTGTCACTACTCT
GCCTTTGCATCTGGGGTGAACTCCTCAAAACCTTCTTATTATGTGAACTTATCTATCTAT
CATAATCCTTGATTACAATCCTTAATTGCATGCTCTAGTTTATGATGTCAGCTGGGCCTT
GTAGGTTGTAGCATTAGCCTCTTCAACTTTTTGCTTGTTTTTTTATTTGCAGGAGTTTCT
CTGTTATGCCACCTGTAGACTTGAGAGT
>comp512_c0_seq1 len=379 path=[801:0-378]
GGATGCAGTTGAAGTATGCCATGGTCTTTTTTGTATGTTTCTCTTGGTGTAACATATTGG
TGATTCCAGAAATGACTTTGGTGATTCCATTTTTTTAATTGGGTTCCTTTAATAGTACAA
ACAAAATTATACTTTAAAACTTTTATTTAAATGTTGACATTCAAGCCAGATTCTTGAATG
CTATGAAGTGCTTATTCTTCTCATTTCCTAGATGGCACATGTACAGACAGTTTTTGTTTT
CTACCTTTATATGGTGGCCTGTTCTACAAGCGGGAGAAAAAAAATAAGTTTCCTCATTGA
ATCCGTGCTATTAAAAAGTTTTTCCCTACCTTGCAAGATAGTGTATTTTTTTTTAACCAT
TTGTATAGTTTTTTTTTAT
>comp513_c0_seq1 len=352 path=[539:0-351]
AAGCCAAAAGAATCACAGGAGATTTCTGCTACAACGCTATCTCTAGAAGTCAACGATATT
CCTGAAGCCTTTACTCGAGTCAAAGATCCGTCCAACTTACCGAGTTCCAGCCAAGGTACA
GACAACGTGCTGCTACCAACTTCAACGTTACCTCCTGCAACAACAGCCGAACCAAAATCA
GTTGCAACATCGTTTGCTCCTAGTAGCTCCACAGTTTCCACAATGAGTCCCCAAATAACA
ACTTCACCAAATAACAATACTCCTGTCACAACAATATTCATCCCTGCAAATGCGACAGAT
GTTGATGACCAGCCGACAACCACGACGGAATTGACTGTTGCTACAGACCAAT
>comp515_c0_seq1 len=347 path=[467:0-118 262:119-346]
CCTCCTTTTCTTTGTCTTCTAAACTTCTACATCCAACCCTCCCGTAAGGCGCCAAGAAAC
GCTGACCCCCTCAGCTACCTGGCCTTGGCGCCGCACGTCTTTTGGTGCGTTTGCCTACAC
TTGAGCAATGTCATCAGGGGAGGCCGAAGCAATGGAATTGAGGGTTGTATAACCAGCTGC
CGAGAGTTTGCCTCTGTTTACCGCTGAGATCGGTAGCCTTCCCACTTCCATCTCTGTGCT
GCGCTATGGTGGCAGTATTATCAGAGTCAGGATCGGTCTTGAAAAGCTTTGTTTTGTGTA
AAAATTAAGCTTACCGAGTTTTCTCTATCCATTAGGTTTGGGTGCTA
>comp516_c0_seq1 len=360 path=[309:0-359]
GTTTATAGCTTTGGTGTCATGTTGTTGGAAATCATTTGCTGCAGAAGAAGCGTGCTGCTG
CCTGAGTCCGGGGAGGAAGAGAAGGCGATATTGACAGATTGGGCTTATGATTGCTATATA
GAAGGGAGAATAGATGCCCTTGTGGAGAACGACAAGGAAGCGATGGCTGACAATGGCAGG
CTACAGAAGTGGGTAAAGATAGCAATTTGGTGCATTCAAGAGCATCATGAAATGAGGCCA
ACAATGGGGATGGTCATGCAAATGCTAGAAGGCTTTGTTGAAGTCCCTAATCCACCATCG
CCTTTTTCATTCACTTTGATTTCTTGACTGCCAACCAGCTAAAAAATGGGAGACCCTGAC
>comp517_c0_seq1 len=723 path=[1:0-722]
CGGGTATTGACACTTGATCTTTCGTTACTATATCTTCCTTGAATTCGTCCCGTTTCGCAT
TCTCATTTCCTGTGTTTCGAGAGGACAACCAACCAAGCAACCATGGCTTTCAAGGCTCTT
AACATTAACACCTCCTCTACCGCCACCCTGCCAGCTCTCCGATCCCGTCTTCCCAAACTC
ACACCATTCAGTGCCTTACAATTCGGTTCACTGCATCCGATCCTATCAAATTGCACCAAA
TTCAAACTCCTACAAAGTACAGCACTTCCATCTATCAAATACTTGCAACTCCCAATGTTG
GCTTTAGACGTTAGACCCAATCCCAGAGACCCAACTGTTAAAGCCTACGCTGCTAGTGCT
AGTGCTCCACTTCCACCCGTTGACGTTGACGTTGCTCTTCCTCCGCAGTCTGAGCCATGG
GAAGGAGCGGAGCTAAAACCGTTAATGGCTTCCCTTGCAACCGGAGTCATCATCTGGTTC
CTCCCCTCCCCTTCCGGCGTCTCACGAAACGCATGGCAATTGCTATCCATTTTCATGGCC
ACCATCGTCGGCATTATCACCCAACCATTGCCTCTGGGTGCTGTCGCTATCATGGGCTTG
TGCGCTTCCGTGCTCACCAAAACTCTAACTTACACCGCCGCATTCTCTGCTTTCGGTGAC
CAAATCCCGTGGCTCGTAGCCCTGGCATTCTTCTTCGCAAAAGGGTTCATCAAAACTGGC
CTG
>comp517_c1_seq1 len=577 path=[1401:0-576]
AACCCAAAGTCCCACCGTAAGAAGTAGAGTGGCAACCATTATCTTTTCGTTCAGAGTCAT
GGGTCCCATCACTTTCAACTTTTCTGTAGCAAGCTTGGGTGCGTCAGGGCTAGTTTTCAC
CGCAGGTGGGTAAATCACGTACAGAATCAACGGCACCAAAACCAAAGACACCAGACCCGG
CACAATCGCTGCTTTGGCCCAATCCGTCCACCCAATCGTCGTCTTGATCGCGCTATGCGT
CAGTGTTGCACACAGGGGATTGGCAGCCATCGCCGTCAAGAACATCGCCGACGAAATCAC
CGATGTTTGGAAGCACGTAAATGTCAACCACGACCCTAGTCGGTCCTCCGTTCCATCCCC
AACGTTGCTGCCGCAAGCCTCGCAGAGCGACTTCACCAATGGCAGAATAATACCACCTGC
TCTGGCTGAAACCGAAGGTATAGCCGGTGCAAGCAAGGCCTCGCTGAACACCAAGCTATA
TCCTAAGCCTAGCGAGGAGCTACCCGATAGAGACACGATGTGGTACGCAATTCGGGTGCC
CAGGCCAGTTTTGATGAACCCCTCCGTTCCATCCCCA
>comp518_c0_seq1 len=694 path=[992:0-693]
AGACAAGAGCAAGCAATAGCATATAAAAGAACAGGGCTGGAAAGAGAATATGACAAATCA
AGAGATTGTTAACTAGAAACAAAAGGATCAACATGATGTGGTGGTAGGGTAAGAGGAGGA
AAATGACATAATCATTAACTACTAAATCAAGATTATTACACACACAAAAAAATCAATATT
ATCTTCAAGAATTAATGAGATCCAGAATGGATTGTGAATGTAGGAAGGAAGAATGCAAAG
AATTCCAGCTATCTAAATTAGCTATATTTTTTGTTGTATTAATTATGAAAAATGAAGACC
ACAAGCTCAAGCCTTTCTACTGAGAATTTTCTCCACAACTTAAATGCTATGTTGGAAGGT
GAAAACATTTATAAATAATATATAAAATCATGGATGTGTTTGTTAGCATTAACCTAAACA
AATTAACCCTCTTTAGCTTTTCCTCAAATTTTTCAATAGTCATGTAAATCCATTTGTTTC
TATTAGTCACATATATATTTTTCCTTTTGATCTGCATTTAAAGAAAAAGAATAAAGATGT
TTCTCCGTCATTGGAAATTTGGAAAATCAAAGTACAACAGAAAAAAAAAATATTGGCATA
AGTCATAAATGAAAAGGTCAAATATAAGTACAATTAATATAGATACATCAAAAGGTACTA
TAGATACATCAACATCATGTCTTCAGTAAAAACA
>comp519_c0_seq1 len=405 path=[1:0-34 36:35-58 287:59-404]
CAGAAGATATGGATCTTATAACATCAGAATGAACCAGCCAAGTTTCTTATAACTGACTTA
GCAAGACACTCCAGATGGCAGTAATTATTACCGAGTAAGGAGTGCTTAACACTAGAATCA
CTGTGTTTATTAATTGGTGAGCCACACCATCAAGCAGGCGTCTAGTGGATTTTGAAGTCA
TAATCTACTTCCCATAAGACCTTAAGGTTAAAAGAGGCATTTATCAGACTCCAAAGGTTA
TTGGCCGTGGTGGCAGTTCCTCGCCCAAATCCTATAAACTATGAATAATAAATAATGCCA
TTTCATTAAATAAAAATTATTCTAAGAAACTTCCTTTAAACCTGTTAATCAACATGCTGT
GGTCCAAACCAGAGTTACCGGATTCGCAATACTCTCTGGTACGTG
>comp521_c0_seq2 len=1113 path=[1:0-518 2355:519-600 625:601-1112]
TTCACCAGCTTGAGGGGGAGTGTCAAAACCGTGTATATAGCCTAGAATGTATATTTAGGA
AATCTTGAAATATTCCATAATTACAGGGATCTAATTTCAGAATAGGCTGTCATTTTATTT
CCTAAATTAGCTTACAAGCTTTGTATATATGTCTGATGCATTCTCAGTATTATGCAATGA
AATCAATTCGTTCTACCCTAAAATTCTAGATGGTATCAAAGCTCCCGAAATCTGGGAGGC
TCTGACTGTGCGACTCAAACCCTAGACGGCAGCCTTCATTGCTGCCGCAAATCCTTGTGC
CTTCATCGCACAAGCACTGTGCTGTCGCTGCACAGTTTCCTTTTTTTCTTTATATAGTGC
CTTCATTGCACAATCTGCCATGGCTGAGATTGTTGACCCAGCGACTGAAACAGGGGATAA
TAAATCCTAAACTTCTTGAGAGCTGCAAAACATCCACTCTGCCTATCGATTGAATGGGAA
GAACTACCTTAAATGGTCCCAACTTATTCGCACCATTCTAAAAGGGAAAGGGAAGGCGAG
TCACTTGACCGATGCTGCCCCTGATGCGAAGGATAGAAGACTCTATGATCATGTCATGGC
TATGGAACTCAATGATGCCAGAAATCAGTGATACATGCATGTTTCTCAGCTCGGCAAAGG
AGATTTGGGATGCGGTAGAGCAAACCTACTCTAAAGCCAAGGATGCTGCTCAAATATATG
ACGTGAAAGTGAAGACTCTAGCGGCAAGACAGGGAAACAAAACTGTTACAAAATATGCTA
ATTACCTTAAGTCATTGTGGATGGAGCTGGACCATTACAGGGTCATAAAAGCTAAATGTT
CAGAAGATTCAACCATTCTCAAGCAATATATTGAGCAGGACAGAGTCTATGATTTCTCGG
TGGACCTGAACTCTGAGTTTGATCAGGTCAGAGTTCAAATCTTGGGAAAGGAGAAAGTCC
TAGGGTTTAATGAGGCAGTGGCTATTAACCAGAGTGAGGAAAGTAGGAGGGGTCTAATGT
TGGAGACTCCAGCCGTTGAAAATTCAGCTATGATAGCTGATGGGACCTCGACCATGGTTG
CTGAACAGAAGAAAGAAGGAATGATCAGTGTGG
>comp523_c0_seq1 len=540 path=[234:0-232 482:233-539]
ACAAGAGGAGGAGGAGGAGGAGGATACAATATTCTTCTTAGATAGAAGAGGGAGAAACAA
AGCAATGCAGAAGAAACCTAATGAAGAGCTTTTAAATCCTGCTGCATGTCTAACAAGAAA
ACACCATGAAAGAAACCATGTGAGAGCACCAAAGAGAAGCTGTGAAAACAATCTTATGCC
AAAGCAGGCCTAAAGGATAAGGACTTTCCCTGAACAATCCAAGCACTTTGCTCCAACCAA
CAGCATATAGAGCACACAGCCATAACACATTCCTCTTCTGACTCCTGCCAACTTTATCAA
CAAGAATTGCTCCAAGCTAAGTGGGCATGACATGTTTCACCAAATACTAGTTGCCAGGCA
ACATGGTAATAGATTTGCAGTTGTTTCCAAATTAGTGCAAAACATCAACACACATATCAG
AAGGTAAAGCTTACTTAGGTCTATGAAACTGCAACATGTCATTATTATTAATCCTATTAA
ATACCACTATCTAATGTAAGAATTTCTCTCAACTTGGAGAATGGGTAAGATAGAAGTAGG
>comp526_c0_seq1 len=631 path=[1:0-630]
GGGAATATAAAAAATAAGTTCCTGAAGCTAGAGCATGTTAGATGAGTGAGAGTTGTTGGT
AGGAGTCAGTAATATAAGACAATCATGAGATTCATGTAGCATTGAGGGTATATCATATAT
GTCAAACAATAAAAAAGAGTGGCAAATTAATGTCAATGATTAACCTTGCGATGGGCCTTT
GGTCCTAACTCCTACATGTAAGACAAATTTCTAATTCAAACAATAGAAAGAGCTATTAAA
TGTTGTATCCATCATTAAGCAGAGTCTACCTGAGTTTTCAGCATCTAGGGCTGAGACATT
AACCCATGCCTTCTCACTCCCTATGGTTTTATGATATTTATCTGAGGATAAGCGACAAAT
TAGGATTCTGGAGCCTATAATGGAGGTGGTATATTTGTCGCTTTCGACCTTATGCAGACA
ACTGGTAAAAAAACAATATCATTGAAGACTTGCAGTGCCACTTTATTATGTAGAGGGATA
TCAACTGGAAAATTGAAAGTTCTGTAATTCTTATGATTTGGAGGTAGTCAGTTGTCTGTT
CTGATTATTGGCTATTGCCAGAATCCATTTTCTACTTATAGAAAGATCAAGATCAGGTAG
TAGCTAATGTGAGGAAGAGACTATTTGAGCC
>comp529_c0_seq1 len=417 path=[409:0-416]
TGTTTTTTTTTTTTTTTTTTTCTCTTTTTGGATTTGAGGTTTGTTGCATCATGTTACTTT
TGACTTGGCAAGGGATTATCTGAAAGCTACTTGAAGTGTTGTCAATTTCAGTGGCATAGG
GACTGAGAATATGATGAGAAGTTTGAAGTGATTTTAATTTAAGCTTAGATTTTTGTATAT
GGACTAATTTTGAAAAAAATAGTGGTTATAGTCTTCAGATTTTATTTTACGTAGGATAAT
GTAGGCGCTGCATCAAATTGAGAAGATCATTCTGGAATGCCACTGCAAAGGCATGCCCCC
TGTAGTCTCATTTTTAGTCTTTTAATGGTCATGGGGTGATGAAGTGACTTATTGGCCAAG
TTCTATAATCTATCTAGTTCATATATTTCTGGTTTAGTTTATAGTGGAAAAAGTGGT
>comp533_c0_seq1 len=533 path=[295:0-532]
TGCTGCCCAAGGGGAAAGGCTCCTGCAAAGACAAATTAAGTCAATTTTGTTCCAGGGTAG
ACTATCACCAGAAGAACCAGATATCAAATAAGTGCTTGGTTAACTGTAATAGAAATTTGA
AACACCCCCACTTTTTCCCACAAAATTCAATAGGAAGCATAGCCTTTCAATGGAAACCCC
AATCTGTTAAATGCACATGATGCTAGAAAAGGTTCAAACCACCAAAACAGATAGCATCTT
ATGGACATCAAAACCAGCTCAAGTCAGAACCATAATGCTTTAGTTGTTGTTATGTGCAAG
CCATATAATCATCTCTAGAGTATTCCTACAAGAAACTGTTTCTAGCAGGCATGACTACTA
ATATACTTCGCAATTAGTTTCAGCCAATTAATTGCATTGAATGCCTTCCCTATTGGTTAC
TACCACTCTCAACGAAAAATAGACACCTAACATGTTAACATTAAATATCAGGCCAAAAAA
ATTGGAAGTAAATGAGAAAGCCTGTACTGTGACTTGCATTTTACTTGTATCAG
>comp534_c0_seq1 len=359 path=[1:0-358]
GGAAATATAAGAATTTCAAGGCATTATAAATGCTATATAGTTCAATTTTCAAAGTGAATG
ACTATAGTTCAATTTTCAAACTAAATGACTTTACCAAAGGCAGAAAAAATAAGAATTACA
GGACCTTTGCAGGTCTATACTCTAGACTACCTAGTTTCTCTAGTAAGATGAATGGATACA
TTCTTACTTGCAATGAAAGATGTCTTGCATTTTGGATTTCTTTTCTTTTACTATTATATG
GATTTAAATTTGGTGATACATGAGGTGATTCCATAATTTCATTTACTTTGCACTCTATAT
TTTACTTATGTTCATTACTGTTGGTATTTGTTTTCCTAGCATTGCCATTGGACGAGAAG
>comp534_c1_seq1 len=304 path=[673:0-303]
CTCCTTTGCAATCTGAATTGGTGCATTGGCTTTTACAAATGCCTGACAGTCTGAGCATTT
TTAGACTCAATTGATGCTATTTTTATTTGCAGGCTGGCTTTCTTAATGTTTTGAAATGAA
GATCTAACTAAACTATTCGTAAGAAAGAAAACACTTGACTTAACTAACCTCTTTGGAAAA
TGAAAAATTCTGAGTGGAGGTTAACTGGAAGAAGGTCCATTATTAGATGATATCACTGTT
ATCCAGTAAGGCTCTCATGTCAAAAATGGATGATTCATTAAAGTATAAATGGATAAGACA
AAGG
>comp535_c0_seq1 len=563 path=[168:0-42 358:43-562]
GAACTTTTTGATCAAATAACCAGGGTAAGCTAACATAAAACTTCAAGGCATGTGTTCGAT
GTGCTTGGGTATGACTAATTTTTTTTGGAGAAATTTTTTGTAGCATGTGCTAAAGGTGTG
CTAGTTGAGCAGGACCTGGGTTTAGTCCTATGTTAGGTCTTAATATAAAACAATAAAACT
GTAATATTTCCTTTGATTTTGTTATGCTCTTCATAATTTTCCAAAGAGAGGAAATTATAA
ACTGCACCAGAAAGGGTTTCTTTTTATAGGGTTCTCCAAGATTCAGGATAAATTAGTATT
ATCTTTTTAATCAATTCTTTGTATACACATAAGTGAACATTTTAAAATGAAGGATAAATT
ACACTCCACCCCCTTGAGATTTCTTGATATGACACTAAACTTAATTTTTGACTAAAATCT
ACACTCCACCCCATTTGACCAGATTGACTAACCCCCATCCTAACTCTGTTAACATAATAT
TCCTTCTAACCCTGAAATTAACCATAGTTAATACTATGAATACAAGATGGCATAGCTTTA
GATTGAAAATTTATGACCTTGCA
>comp536_c0_seq1 len=325 path=[461:0-324]
TGAACAATCCTCCGCTGACCTTTGCAATGGCCTGTAAGGAATACAATTCTTCCGATCATC
TTTTTCCGGCAACTTCAGACACACTGGGGATTCACTGCAGAAGTAGTTGTATGAATACGT
GAAGTTCTCCAACCTAGGCAATGTGCATATACTAGCAGGAATCGTGCCAGACAATTTGTT
ATGCGCCACATTCAACTGCTCCAAGCTCTTCATTCCTCCCATAGATTCAGGCAATTGTCC
AACCAGTTTGTTAAAGCTCACATCAAACACTGTGACTTTGTCCAAAGATCCTATTTCCGG
TGGCAAACAACCCGTTAGCCCACTA
>comp537_c0_seq1 len=811 path=[1241:0-373 453:374-810]
AAAAGAATAAGAAAAATAAGTATTTATGTCAATTAGTACCCATTGTTAAGATGAGTTAAT
TATCATAAGAAATCTATTATGCAGTCTTGAAACAGTAAAGGGATATGAAATATCAGAAAG
ACACAGCTTCAACAGTGAAACTCTTATTGGTTTCCAAAGCCACGGCATCACCAGTTTAAT
ATAGTTTGTTGAATTTGGTCTCCTTCATTCATAAAGTGAGTTGCTTCCTGTCATAATTGA
TTGCTGGACAATGCGCTTTACAAGAAGGCTGGAATAAGGTGGTTCATTTGGCACAGCACT
AAAGGCTTCTTGATTTGGGGTTTTAGACTCTCTTGTTAGAGAGGATCATAAAACAGAGCC
ATTCAAGTTGGTGGAGTAATATATGAAGGACTAGAGCTATATTGCACACGTTCTCAATGT
AGTGCTAGCATTGTAAACGTGTAAACAAAAAATAAGCCATAGGTTACCCATTCAATGTCG
ATAAATTTTGGAGGTATTCCATCTCAAAAGTAAAAGAAAGAGCAAAAAAAGGTGAAAAAA
TAAGCACCCAACATCAACTGACAACTTTCTATAATTTTTTCAGCATATGGGATATGACCA
CTCTCTCTAATCATAGCAGCACCTCTGGAATTAACTGTTTGGGGGAAAATTGAAGGAATG
CTGTTCACACCCAACAGATGCACAAACAACAAATAATCCACTATTTCCACGTTGGAAGAG
GAAAAAAAATCCATTTTCTTTGTTACAATAAATTGAGATAATCAAGACTACTGTCTGTCA
AATCAGTAGCAAAGAAAGAATAAACTCATTT
>comp538_c0_seq1 len=532 path=[1:0-531]
CGCCGCCGCCCGTGCTGCCATCTGATGGCTCGTTGAGCATCCTAACGAACTCCTCCTGGT
GTTGAGAGATGAGGCGGAGGAGAGCCGGGTTGCTCTGCCCGATTTGTTGGAGTACCGTGT
TGAGGAGCTCGGGGTTCTGCTGGACGACCGTCCGCATCTGCTGGAATTGAGGTTGCGTCC
TCAGGAAGCCCAGAGGGTCTGAGGCGTTCCCTCCTGCCGCTGACACATCGCGGATTGAGT
CTTGTGATTCGCTAACGGAGACTTGGTCGTTCAATTCTGGGTCTGCTGGGATTCCATTGA
TAAGATATTCAACGGCTCTGTCAGGATTGTTAAAACTAGCATTGAGCGCTGCCTCGACCT
GCGATCTTTCATAGCCCATGTCCACGATGTTCTGAACCATGGTGTTGTACTCTTCGCCCA
TGAGGAGAGCCGATTCAGCCTGAGAGACAGTCGGTGCAGGAGTTGCAGCTGCAGGCGCGG
CTGTGGTTGTGGTAGACTTGGCACTTTCGTTGTCACCTTGACCAGTTGTCTG
>comp538_c1_seq1 len=403 path=[1399:0-402]
GTTTTAAATGATCTAGAAAACATTTTAAACGTAACGTGTTGAATGAATGCAATGTGGATT
TTGAAAGTAGAGTGTAGTTTTTATCTTCAACAGTATCCATTGAGCCACATACGCTGGGGA
AAACAAACGTAACGACAGTTTAGCCGACAAAAAAAAGGATCGATGGTGGTTACACCAAAA
TTAATCGTCCAAGTTTTGAGAAAGGAGGAAATTAGCGGCGAGGTTTTCGTTCTTCTCGCA
GGCGAAATAGGCTTGAACCACGAGGTGTTCGGGGAATCCGAGTGCTTTTAGTCTTTCGAT
TGCTTCCTTGTCCTGAGGAGTGACTGGTACCGCGATTTGAGAACCGGCTCCGGCTGTGTT
GCCCGACCCTCCACCACCGCCGCCGCCGCCACCGCCCGTGCTG
>comp539_c0_seq1 len=527 path=[1:0-526]
AATTAAACATCCAGTTTTCGTTGAATGTTTATTTGATAATAATTTTTACACATTTTCAAA
AACTGGATTTTTTCTTCTTCTCTCTTTCTGGCTCGACTTGTTTAAATTTACTTTTTCTTT
CCAGACAAAATGATACCATCATATTTAGATTGGAACCATTTCATTGAGTCCTCCTTGGTC
ACTTTGTGGTTGAATCCAATCTTGCCTGTCTTTCTTCTTCTGTATGCAACATTGTAACCA
GCTCTTCCTAGAACAACGTAGAAGTCTAGACCATAGATACCAATTGATGGGTCGTACTTG
ATACCTAAATCAATGTGCTCTTGGATACCGAAACCAAAGTTTCCTGTCTGGGAGAAATTC
TCTCTTCTCAGCTCGTATTCACGAACCTTCAAACCTTTCTCGAGGATCTCCTCGGCCTTG
GCCCCACGGACAGTGCAGTGAACGGCAATCTTTTCATTACGACGAATACCGAAAGATCTG
ACTGTATATCTGGCCTTACTGAAGACTGGCTGTTGGCCTGTAAGTTG
>comp540_c0_seq1 len=376 path=[413:0-375]
AATTGTGTTGGTGATGATTGTCAGTTTGAGCCCTTATTCTGATAGCATCTACTTTTTTAA
CATCTTGAATCTACTGTTTTTATGCTGAATTGTAGTATCAAAACGAAATCAATTAATGTT
GTAGTGAATTTATCCAAAATGCTAGCATATAGTTTCATCTTTTGTTGAGAAGACTGAATA
TTAACTTCTCCCACCTCTTTTTAATTTACGTAAGATATCGTTTTAACTAAAAGTGGGTGG
TTATTGCAGCCTTGAGGTAGTTAGTTCTGGAATGTTTTTCAAATAACTCATTATTTCAAC
ATTTGCTCGGAGATGCTACTCAGTTTTTAAATTTATTTTAATAGTATATTCTGTCAAAAA
AAAACTTAGCAGATCA
>comp541_c0_seq1 len=892 path=[1:0-891]
CTCGAACTAACAAGGACAATTTACAATGGAGGACTTTCAGATATTTATATTTAAAAATGC
ATTAGTATTTACAAGGTTTTCTTCTAATTTTGTTACGAAATAAAATTAATAACTACACTG
GGCGATAATCCATCACGCCCAATATTTTCATTCCGTGAATTTTTTCTACAACTATTCTCA
TCCAATTTTAAACCTCTACCTAACGAGATATAAAGATTTATTCTTATTTTCTCGGAAGAA
GGCACCCAAGTTTCGCCAACGTAGCATTTAAGCAGTGTTTTTAATTTTAAGAACATTCTA
AAACGTGTAATTAATTACCCTACGCATCTTTAAACAATAGGTACCAATATTGGTCAATGG
ATAAATTGAATCAAGTTTGTAAGACACTTTTGTGGGGTGTTCAAGAAAACACCTGGGCGG
ACTTAGGGATGTTCCCCGTTTTTCGATCAGTATCTTGATAATCGTTAATGATCGTTGGTT
ACCTAGCATTATTGATATTCAGATTTTTTTTTCTCAAGAAATAGTACTTAACTAGTAAGT
ATGAAACTCCTACCGAAAATATAATTATTAGGTACTCGCAATGTTATAATTTTTCAAAAA
AGTTTTCTAGGGCGTGGAGATATTTTCGATTTGTCATTTTTCGAAACACGAGGGATACCT
ACAAATAAATAAAGCCGATTCGTACATCAGGGGGTGGTAATAATATTGACATATTTAAAT
TAAAAATAAAGACAAATTGGTTTAAAACCATTCACACTTGACTATCCTAAAATATTAGGT
AGGTACCTATCATATCCATAAAACAATTCGTAAAATCTAAACCTACTTTTTAAAACCTAG
TTTGATATTCACAACAATCTATACAAAAAGAAGAAAAAAACAAATACTTTGG
>comp541_c1_seq1 len=606 path=[1739:0-605]
TCCTTGTTAGTTCGAGAGCGTAATAATGATTAATTTCCTCTTGCTTAAGTTAGTTTTATT
TCCAAATTCGTACCAATTATAGCTTACAGTCAGTCGTTATAATTAAACCAACCTACTTGG
GGACCTGGAAAATGGACTGACATCAAACATTAATATCCACTAGAATTCAGATATGAAATG
TATCTGGGTGGTACTGATTTCATAAAGAAAAAAACGAGGTATTTTATATTTACTCAGTAG
GTAGCATTTTTTCTGCTGTCCTCTCACTACCACCCCACTACCTACTTTTCAGTTTCTCAT
CTCCACCAATATTTCATGTACTGACCACGAATAAGACATATATGTATTCTTCTTATATGA
CGACTGAAATTGACATAATCTTCCTTGAATGTTCTTTTCAATGCCTTCTTCCATAAAGAA
TGTTGGTGGAGTTGAAAAGTAGGTAGGACGTATTTTACCTTTTCGTTTAAATTCAAAATA
TAGTAGGTGCCTATAAGATTTGAATGTGAGAACACCTATGTATGACTTGAAAGATACCGC
CTTTCTTACTTCATTCATTGAGGCTTTTATAAAGCTTCGAATGAAAACTAGGGCTGAATA
TTGTTG
>comp544_c0_seq1 len=347 path=[1:0-346]
TTGAGAATGAGCCTCATGTTCCTAGAGTTCTTTGCGTTGGACAACGTGGTCCTATCACCT
CATGCAGCTGCCGCTACTTCAGAGTCTTTCATGGGTATCTGCCAACTTGTGGGACGCAAT
TTGGAAGCCTTCTTCTCAAATAAGCCTCTCATTACTCGAGTTATAGTTGATAGAGCTGGT
TCTTCACATGTTTGTGAAACACCCACTCGTTGAATCCTTCTCCAACAAATCATTCACTTC
TTTGGACAATACATGTATAGTTAGTTGGTTGTAAAGTTTCTTTTGTCATATATTCTGTCT
ATCAATAGATCCTGTTTGTACTAGTTATATGCCTGTGAAGATATGAG
>comp544_c1_seq1 len=416 path=[1042:0-415]
GGCTCATTCTCAAACACATCCAAATCAGAGCCCCTCTTCCAACATTGGTAATAGCTCCAC
CGTTTCCCATTGCCAACGTGACTTCAATTCTCTGTTGATTATGTGCCTCGTTTGGTCATT
TAGAGCACAACAGAGAACAAGTACATTGCTGTTAGCTGCAAGCTCAACAACACTGGAATA
GAAAGGGTGAGAAACAAGTGGCATTTTGTTCCTAGAGTGGTATAATATAGTGCATATAGT
GCAACCGAAGGCCTCGAGCCTATGGGCGACTTCCAAGCCCATCTTTACCAAACCAACAAA
TCTAACTTTCTTGTCTCCCAGCTGAAACATCAACTATATGCGTACAAATGATTAAAGCTT
TAAAAGTAGAGGCAGATAGCTAGCATGAATGGCAATTCAGACTCACGTACCTCTTG
>comp545_c0_seq1 len=347 path=[325:0-175 15:176-346]
CTCAAATTTTCAAATAATTTTACTTACAATAATAGTACCAAATAATATTTAAACCCAAAA
AAACTACATAAAAATTCAGGGAACTCTAACTCGTTTAAAAAGAAAAAAGCCTTGTTTTCT
TTGCAAGAAATACTTAAATAGTATAAGAAATAAAGAAAAAAAACAGTCAAATAAAGAAAA
AAAAAAGGAAAATGAGAAACTTGTGCATTCCATATCAACCAGATGGAGGAGGATAGCTAC
TAGTATCTGACCATGTTGACGGTGGAAAATCTGACCCTCCGCCGGAGCCGCCGTGAGAGT
GGTATCCCGGTGGCCGGAAATACCCCATTTGCTGACTAGAAAACAGG
>comp547_c0_seq1 len=1583 path=[1:0-1046 2100:1047-1582]
GAATCTCCTGCCGACCTTGACGGTCATGGCCGTCGTCGGTGGAGTCACCACCGGCTTCAT
TCTCAGAAGCACATCTTCCACGAAATGGACGCCGAGGGAGATAATGTACATACAGTTCCC
TGGAGATCTGTTCCTTCGGATGCTGAAGGGACTCATCATCCCCCTGCTGGTGGCTTCGGT
GACCGCCGCCATCGGCTCTCTCGACTTCAGCCTCTCCAAGAAGATTGGAGGGAGAGCCGT
CCTCTACTACGTCTCCACCACACTCCTCGCCGTTTTTGAGGGTATCGTCCTGGTAATGCT
GATCAAGCCGGGATCGCGAGTCAGCGAGGTGTTGAAAGAGGAGAGGAAAGGCCCAGTCAT
GAGCCGCCCAGTCACCACTGCTGACACCCTCCTCGATCTTATCAGGAATTTGTTCCCGCC
TAATTTAGTTCAAAGTTGCATAGCACAGTACCGAACCGTCATCATTCCTCCGAAGGAGAT
CAACGAGACTAATAGCGACATCAAGCTGTGGGACTTCACCGGGGAGTACACGGGCAGCTC
CAACGTCCTCGGTCTCGTCGTCTTCTCGGTCGTCCAGGGCATTGCCATTGCCCAGATGGG
CAAAGTAGGAAAACCTCTCCAGGACTTCTACACCGCTCTGGGCGAAGCAATGATGCTCAT
CACCAACTGGGTCATTTGGCTCTCACCTTTCGGTGTCTTCTTCCTCGTCACCTCCAAAGT
CCTGGAAGCAGAGAGCTTCGCCGTGATGGTCGGCCAGATGGGGATGTACTTCATGACAGT
CCTGGTCGGCCTGATCCTCCACGGTTTCATCGTCGTCCCCCTCATATACGTCATCTGCGT
CAAGAAAATGCCGATTAAATTCATTGCTAACATGGGCCAGGCAATTTTAACGGCATTTGC
TACGGGTTCGAGTTCGGCGACCTTATCGGTGTCGATGGGCTGTCTGGAGGAGAAAAACGG
GATCGACGTGCGAGTCTCGAGGTTCGTGATGCCGATTGGAGCGACCATCAACATGGACGG
GACCGCTCTTTACGAAGCTGTCGCCGTGATTTTCATATCGCAAGTTCGACACATGACTCT
TTCATTGACTCAAATCATCTCCGTCAGCATAACTGCTACCATGGCGAGTATCGGGGCAGC
TTCGATTCCCCAGGCTGGTCTCGTAACGATGGTCATGGTATTGGACACAGTCGGCCTCCC
AGCTGAAGACGTATCGCTCATATTTGCTGTCGATTGGTTGCTAGATCGGTTCAGAACGAC
GGTCAACGTGCTGGGAGATGCCATCGGAGCTGGAGTCGTTGCTCATTTGAGTCAGAAAGA
GCTCGCCCAACTTCCAAGCATCAACTAAGTTTGACGACAACTTGTGGAAGTTACTTCGAA
ATTCCGCGCCTGCGAAAAACCCAACCAGTCCATATCATAATCGCATCAGAAGATGGAACA
TGGAATCTCAATATTTACTTTGTCGAGTTGAGCTGACTACGGTTATTTCTCACTTCAAAT
AACTGACACACCTATGAGGACATCATTATTAAACATGAAGATCTCTTTTAAAGGTATCCT
TCACCTTCGAAACACAAATCAGC
>comp548_c0_seq1 len=571 path=[1:0-363 365:364-368 747:369-570]
CAATAAAACTAGGTTCCTATCAGTCATCAAAAACATCCTTCGAAACAGGCTTGATACCAG
TGGACGGGCATGGTCGGCATTGAAAAATAATAAGCGAGCAAGAAGGATCAAAGGCAGGAA
CAGGACTAGGAGTGTTGGAATCAAAAGAAGGATCATAAATAGGAAAGGGAAGGATAATGT
CTACCTGGGTAACATCTAAAGGTATAGACAAGAAGGAGTGCTGGTCGATAAATGTGACAT
TAGCAGACACAAGTTAACGACACAAATTAGGAGGGTAGTAGCGATACCTTTTCTGAAGGC
CAGAGTACTTGAGGAGACATTTGAAAGCTTTTGCAGTGTGCTTGTCCTTACCTAGAGGAA
GATTATGAACAAAACAAGTACAACCAAAAACATGAGTAGACACATGATAGGTAGGTGTAT
CAGGAAACAATAGTGAGGAATTTTATCCTTTGACACAACAGAGGGCATGCGGTTAATTAG
ATAACGAGATAAGAACAACATCCCTAAAAATGAAGGGGAACATTCATATGTAAGAGTAAA
GTTTGGACTGTTTCTATTAAATGAAATTTTT
>comp549_c0_seq1 len=368 path=[346:0-258 784:259-305 652:306-367]
GCTAGCCAAATTGAATCCCATCCTCAATTAATTTTTATAGTACAAAAAATTGAAATATAT
ACAAACGTTCAGGATGAAAGAAATCGTGCTCACATGCAAATTCTCGTAAAGACATTGAAA
CAGACGGGACTAACTGATTAAACAAACCCAAGCAAATTCTGACATGAAACAAATGACTAT
TGTCTAGCAGGGTTAGCTCCTGCAACCCAACCGGGTCAGCAAACCCCATTCAACTTTGAT
AGTACAGATTCCTGATGAATGCCACAATATTTTACTCGCATCGGCAGACACTACAGAACT
TACACACTTTCATAAAATAAAAAGGGAGCAACAACGACAAAGTACCTGGAATGCAGCCAG
ATATGTCT
>comp553_c0_seq1 len=319 path=[265:0-318]
GGCCGATTGCTGTTTCCGAAGCACAAAGGACAAGTCACAAAGTAACTACTGCTTTCTACA
TATAGATATCATTGAATTTATCTTTCTCTTTTGTTCACTAGCTCTATTAGGCAATCCAAT
GTGGTAAAAACCTACTATTGAACAGAGTTTCCACAAAATGCATAAAAAAGAAATGAATGG
AAGAAAAATATTGTATCAGCATAGTTGCATTTAAGGGTAGCCATATTTTGGTTAACACAA
GGAGGAGGAATAGGAAAAAATAGAAAAGAACAACTAGATTTTTGTTCAGCACAACAGAAA
GGGGTTTTAGCAACAACTA
>comp556_c0_seq1 len=492 path=[409:0-491]
CCCAAAACAAGCCATAAAGCCAAGATCACTAAAACATAGGTAAATTAAAGAATATTTCAC
CAACTTCCTACTACACATAGATAAGTGTTGCACCCCAGTCAAACACAGTCATGCATAAAA
ATACGGAAACAAGCTTATGAGGATAAGAATATTCCCAATATTTGAGCTTCTTTAAAATAA
GCTTTCAATATTTCTCATGATACAGAAAAGATTGAAAAGGAATACTAATTACATCAAAAA
CACATCCGAGAATTACCTGTCAGAAAGACCAATCAATAAATACCTATAAGATTTAGGGGG
AAAAGGAGCAAGTTCTAGACAATAAAGTTGTGGCCCCTTGAGTGCTCACAGCCTTAAGAT
TCTAGGATTTCTTGTTTAAAAAAAAATACACACACACACACACAAATCATGCATTAGCAT
GCAAGCCACTGATGTATGTATCTTAATATCAACTATTGCAAGTCACAAACCAGAAGTACA
AAAGTTGCAAGT
>comp557_c0_seq1 len=353 path=[653:0-352]
ACTACCTCAGCAGCAAAAAATCTATTATTATCAAGCTCTGTATGTCAGTTAAAGGAAAGT
AGAGAAACACAACAAGTAGCAGACATTGTTGAAGAAGGATCCTCTGCTTTAATAGTGGGT
ATTGACAACTATTTAATAAAGTTGCAGTACAACAAATATAGAAAGAAAAAGGTTTAAATT
CATTAGAAAGAATTTCTATTACGTCTTTTGTGTGCATAAAGGCAGAGTAGTGAGAACACA
CGAAAGAATAGATATTATAGGCCCAGGTATTGTCAACTGAAGAAAAGCAAAGGACATAGT
TGAAATGGTGTAGGCAAGTAAAACAGAGACAAAATTGCCTTGGTGCAGAAGAG
>comp558_c0_seq1 len=324 path=[302:0-323]
TAGAATTTGAATTCTATATATCATTTATCTGTCTTAAATATTCAAAAATGCGACTCATGT
TTGAGATATTTTCATATCTAAAATATCTATGAATTACATGTCTGACAAAAAGGATCTGCC
TTATGGAGCAAGGATATGCTGCAAGGTTGGCATGTCTAAGTGTCCAACATGTACTACAAT
TGGTCTTGAGGTAGACATGCCTCAGAATGTGTATGTATGTGTCCAGATAGATGTTATTGA
GTTGGTTGAAGAAATACTGGGAGACAAGGGGCAGGATAAAATACCGGGACAATACAAGAT
TTTGAAAACATTTCAATTGCCCAG
>comp558_c1_seq1 len=401 path=[981:0-400]
TGAAGTAAGGCAACCACATTCCCTGTGATTACAAGACAACACCAAGGTTCCTTTCAGGCA
GTTAAAGTCACAATTAATCACTGGAAATGGCTAGAAGTTCACCTAGTTTTAATAGAAGCA
GTATATCCTACCGAGCATAAATAAAGGTAACAGACACTGATTTCCATGCACATGCTTGCT
GATAGTGTAGTACTGGAAACTAATAATCATCTATAAAAAGATTAAATTATTCTCATAAAT
GAAATGTTTACAAACAAATGTAATGAAGAGGGTTTCAAATTTGAAGCTAGTGCCATGTTC
TTTTAATTATTCTACTTTCTCTTGGGTAGTTAAAAAAATTCTGCAGAAAAATCATCAAGA
GCTTCTACCCTGTAGGTTGGTAACCCTTCAATATAACTATA
>comp560_c0_seq1 len=557 path=[783:0-556]
GTATACATTACTGTTTTAACGTAGGTAACATTCCGTTGGGAAGTCCTGCTAAACCCTATT
GTTGTTTACTGATTGAATATTAAGTAATTAGAAGAATGGAAGCAAAGGCAATGCCTGCAT
GGTAGTTGGATGGCAATTTAGGATCTTACATTGTAGAAATTGATGGGTGGGATATACTAG
TCGTGTTTCATTTCTTATAAGCCCTTATTTATGGTGAATTCTCTATGAAATGCACCATTG
TATGTTTATAGAGCACTGACATTGCCATATTTAGACATATAAGGTATAACTTTCGGAACA
TATTTATTCAATGAAAGCTAACATGAAGAATAAATTCATCTTAGGAAAGCTTGATTATTT
GATAATGGTAACTGTAACTGAAATTTTTTCTCCTACAAGTATTGCTGATGGTTGGCATTG
ATGGCTATTCTTAAGTTGATCCACATCCATGTCGAAATTGAATGTTATTTTGTTTAATCA
TTGGCTGATTGCTGATAGTATAGACTCTGAATTTTCTTAAGCATCTGATAAGAATACTTC
TTGCGGATATTGGGTCT
>comp561_c0_seq1 len=390 path=[588:0-389]
CTGATTTGCACTGTAACTAACTCCTTGGAGTTTGTTTGCTGAATTTCCTAGCTCTGAGTG
CTTTGCTTCTTCTTTTGATGTAAGTGTAACAAACCATGCATGGTAGAGCAAAAAATAGGA
TGATCAAGTGACTTCAGAATTCAGTTGATTTTTGGGGTGGTGGTCTAACTTTGTTTACTG
ATATATATTATATAATTTTCAAGTGGGTTGGCTCCGTTTGTGTGTAACCAGTCTTATTCT
TCATTAGTCAATGGTCACTCAGGAGGTTGTTGTTTTTACTGCTCTGATGTGATCAAAGGC
ATGCACTTTCCGGATTGTTCTTCTATGCTTGATGATTTGTATTGTGCATCATGGAATTGG
ATTGCTGTGTGACAAAATGCTTGACTTGAG
>comp562_c0_seq1 len=501 path=[1:0-500]
GTTTTATTCTCTTCAATACCCTTCTCAGCTTCCTTCTCTTCTTTATCCACCTTTTCAATT
TCCTTATCCTTTTCAATCTCCTTATCCTTCTCGTTTTCCTTGTCGCCCTCCTTCTCCCCC
TTTTCCTCCTTGCCTTCCTTCTTTTCTTCCTTTTCTTCTGGAGGTGGTTTAGGTAGATGT
GAATTCATGTCTAAGTTCTTGCACATTTCTTCCCAGTCAGGGAAACACCTTTCTTTCATC
CTGTTGACAAGACCCACTAGGTTGGCACAGTTCTCCTGCATGAAGTCGCGAAGAGGATAG
TTGACTTCCTTGTCGATGAAGTACACTTGAGCCAAGTTGGCGAAGGCCACCACGTCCAGC
GAGGTGGGTTCGTCGCCAAAGAAGAATGGCTTATCTCCGAGCTGCTCCGACAAGACTTTG
AGATCTCTCCTGCCGAATTCACTGATCTCATCGGGCTTGTGGACACCCATGCCTTGGGCC
TTGACCTTCTTGGCTCCCTTG
>comp562_c1_seq1 len=751 path=[957:0-750]
TTGGCTCCCTTGCGTCCGTATGTGAACTTGAAGAAGAAGTTGAGGATGCCGTTGGGGATC
TTCGAGCCGAGCTGGTGCTGCAGACTGACGTGGTAACCCTTGATGACGTCGTCGGTGAAC
TTGGTTCTCCACCACATGACGACCCAGAGGAGGTGATTTTCAATCATAGACGTGAGGGCG
TACGCGACGTTCTTCTGTTCGTTGTCGAGGTCCTTGTCCAGATCCTTCTCAAACCGTTCC
GCGAGCTCCTTGATGATGATGGACGAGTCTGCGATCTCCTCACCATTCAGCTCAATGAAC
GGCAACTGTCCCTTCTTCGACCGGAACTTCAACTTGTGGTCCACGTTCTCGTATTTGATG
CCGGCGAGCCGAAGCCACGTTTCCACTTTAAGACAGAATGACGACAGGGAGGGTAGCACC
GGGGTGCGCGAGAACTGATAAAGATACACGACATCCTGCTCGAAATTGGGCTTGTGAACG
GTGGGCTTAGGAGGTGCGGGGGGAGCCGCCTCCTCCTTCTTGGCCTCCTCCTCCTTCTTA
TCCTCCTTGGAATCCTCGGCGGGCGCCGCCGCGGGGGCCGCCTCCACGTCGGCCTTGTTA
TCCTGGGGGGCCTCTGCTGGCTTGGCGGGCTCCGCCGCCTTGGACTCGGCCGTCACGTTG
TTCTCCTCACTGGCCATGTCGTGCACGGGGCTGTGCTCCGGCTCCGCTCTGCTCTCACTC
ACGGCACGGGCTGCTCGGGCACGCACTCACG
>comp563_c0_seq1 len=629 path=[601:0-628]
TTTTAGGAGAGTTGATTTTTGACAATCACCATGCAGGATTGCATACAGCTGCATGGATGC
TAACTTTGTAACTAGTGAGAAAGTTTTATGGTAATTAATACGATACGTTTGGGCATAACC
CTTGCCCCTTAGCAACAAGTTGGGCTTTCAAGTGAACAAGAAGGCCATCCAAGCTGACCT
TAAGGTCCTTAAGCCTGTTGGGTTTTTTTGCATCCATTAGCCTGTATCTTATATGGTAGA
GAAACCAAATCCCATGTCTAGTTCAAGTGCAGCCATCTCTATCATCATGGCTGCACGCCA
TCCATCATGTGACATCACCTCAATAACCGTGGTGGGTACCCTTACAGAGTCAAGTGAAGC
TACAGAGGACTGTCAGAAGAAGAAAGACTATCATAGGAAACAAAGGAAGGCATAGGATAG
GTACAAGAACGTTTCCTTTCCAAACAGCAATAGTAAGGATCAAGGGTAGGGTCTAAAGAT
GGATCAACAGAAGGTGGACTAGTGGAATCCTGAAACCAAACATCCAGTGTAGACAGTGAG
TATGTTCAATGGGTGCCATTGTCATTTGCTTGGATAGCAAAGTATAAATGTATGGAAGTT
GGGGGACAGGTTCAGACACGTTCTCAAGG
>comp563_c1_seq1 len=323 path=[301:0-322]
GTCAAAAATCAACTCTCCTAAAAGCTTAGGTTGTTATGTGAATTGATTTGGTTGCAACAG
TTATTAGATGAGATTGGCTTCAAAAGTACCATGCCCATGAGATTGTGGTGTGTCAACTAG
GCAGCTCTACACATTGGATCAAATCTAGTGTTTCACAAGAGAATGAAGCATATCGAGATT
GATTGTCACTTTCTTGAAGAAAAGTTGCAGCAGGGACTCATTACTACCAATTTGGTGAAG
ATTGGAGAGCAGCTGGCTAATATCTTAACTAAATTTCTCACTCATATCGAGTTGACTATA
TTCGTAACAGACTGGGCATGAGG
>comp564_c0_seq1 len=380 path=[1:0-379]
CACCCACATGTGCTAGAAATTTACAAATACATAATCCCAAATCCAAAACACAAAACTGAA
ACAAAGACAACAATGAAGGATCAAGAATTAGATGCTTAACAAATAAGAAAGGTCACCTAC
GTTTCTTTGACTTTGGATTCGATTGACGGGTTGCAACAACTGGTTTCCCAAAAATACCAC
AAAGACCACAGGTAGCCTTGGGAGAAGATGCGCCCTTGGATGGTGGTGCAACCGTGACCG
TCCGATATGGGCGTGCTCCAGATGATCTGCTGCGTTCCAAAGTGCTAATTGATCCAACAC
TGGGGGATTGCCTAAGTTCTCTGGCTTTCTCTCTTCCATTTCTTTCTTGGTAACGTTTAG
GCTTAGCTTGTTGGTTCTGG
>comp565_c0_seq1 len=482 path=[1974:0-481]
GATTATTATTTCAAGCATGTGCCAAGCATTCAGGAAAAAAAAATCGATATCTCTGGTGGG
CTTTTAATTTGATTTCTGTTTAAATTTCGCAAAATTTGAGTTACCATTAGCAATACGTGG
GATGAGATTCGTTATTTTGAACCAAAACCAAACCACCTTGCCAAGAAGAACTTGTTCTTC
CCACGAGAAGCTTCCTTTTCTGCATGTGCTGGTGCTGGTGCTGGAATAGGAGATTGCAAA
GGTGGCAAAATAAGTTTGGCTGATTTTGGTGAAACCTTGTTAGTTTTAGCACCTTTTGTG
TCCATAGAATTCTTTTTTGGACTTGACATGATGGCTTCATGGTCAGATGTAGAGCTTGAC
TTTCTCCCGCGAACTTTATGCTCCACGTCTCCTTCACTGTTTTGGTCACTTTCATCAGGA
GGTTTCCCATAGTTATGGTTCAAAGCTTCAATGAAGGAAATAGTTTTTTGGTCTTGCATC
AA
>comp565_c1_seq1 len=780 path=[758:0-779]
GTCTTGCATCAATTGATCAAATAGAGCATATCTGTAGTTTGGGGCTAAGCCAACCAATAG
CAACTGGACTGCCTCTGCATCTCTTGTCATTGATATTGACGCAGATGCCTTTAGATTCTG
AGTGTCTAGCAGAATACCAGCAAGCAATAATTTCTTCAGCACGGTGTTTTGAAGTAGATC
ATAGGCATCTTCGCAGTAATTATCAGTAAGAATAGTGCACTGAGATCCAACCTCGCCAGT
AGTGCTCAAGATATCTTGTCCAACCACGAGGACGCTCAGTTGCCCAGTCAACAAAAGGCT
TTCCATGTCCACCTCATCAGCGAAAAGCAATGCAGTAGCATCAAGACCAGCATGATAAAA
GAGCCAAGCAGCCTGCCTTAGCTTCCACATAGAGCCTCGCTTCACATTCATCACAGGCAC
CACCACTTGCTCGCTTCCATCGTCATTGTCCTTCTGCCTGTAACCCAAGAGCCAAGCATG
GCATATGGCTGCTACCATTGACGCAGTACTGTTGGAAGGCCCAGAGAGGACCATTTTGAC
ATTTGCATCGAGCTCCATGTTCAAGACTTTCTGGAATAACATTTTCTGCTCTCTCAGGAA
CCCGTTGAGGCTATGGTCTTGGGGTCCCTCTCCCTTTGCATCAGGCCTGGGAGCGATTTT
CTCCACCGAACATGTGGAAGACGATATCGTTCTTCGGTGAGTAGATTCGACGAGATTCCT
CGGTGGCGACAGAGGTTGAGAATTTAAGGTTCGCCGGGAAGGGGCTTGGATCACCTGCGG
>comp568_c0_seq1 len=762 path=[175:0-668 18:669-761]
CCATTGAATTGAAAAGCCCATATGATGTAGGATAAAATCCCTAGTGTTAAATCTATAGTA
CACAAGAAATATAGATAGAGAAAACAATGGGCAAGGATATCTAAAAACACAGCGAAAGAG
GCTAAATATTCAGGTTAGCAACCTGGGAAAAGAGAAGAAAAATGGAAAAACTGAACTGTC
CCCTTTAGATATAATCCTAGCTGTCTTCAGTGCTACAGCACCCACGCTACGGTAGTGCAA
ACATACTCTTGCTACAGTAGCATGAATAAAACTCATCCAATAGGCAAATAGCAACCCAAC
ATTTAATTATAATTGATCTCCTTTGTCTTGCATTGATTCCGATCCACTTGATAAGAAAAA
CTCTTCTTTGAGCTTTAAGGTTGATCTTCAACCCTTCCGCTCCATATAAAATGTCACTTT
AAATACTTGAACATCTTGCAATTCTTCTCCCCCTTGTTCTCCAAGTTTTGAGTAATTAGG
ATTCATTCAGCTTGTATCTTTAGGTGGTTTGCAGTAACAGATAAAATTTTGAACAAAATC
TGAATGCAACAGACCTAACCCAATAAAGCCAATGATCAATGATCAATTCTAGAATATTTT
TTATAGAAACTGGTATTGAAATCAGATAATGGAGGCTAGCTCCTTACAATCAGAGGAAGA
CCTCTGCGGTTACAAAACAGAACCAAAAAGAACACCTGCAGAACTTCTAGGGTCTGCGCC
TCCCTACCAAATGGCCCAAAAACCTTACTCAATTTCTGGATG
>comp569_c0_seq1 len=527 path=[770:0-354 241:355-526]
GTCTGAGATGTAAAGATAGTCAACCATGAGACAGGAACATAATTTTGCAAACCTTAGATC
TGTGCAAATAGAAAGGTGAATACTGGACAGGAACAAGCATTCTCCATAGCAAGTATTCTA
CATAGAATCATCTTCAATGACTTAAAAGTTATCTATTTCTCCATCGCCTCATCCTTTTAA
AATCAGTGATAGAGATAGCAATAAGAATATTATATATTTTTATTCTAATTATCGTGGGAA
TAGACATAAAAGGCTATAATTTGGTTAGTATGGTTCAATAAGCAAGTTGGAGATTTATGA
TCTAGAACCTAGGGGTTTGATTCAATTAGGAATTCCTATGTAATAAGGAGTATCATTTTT
TTTTTGGTGAATAAAAGTTTAAGGGGAGGCCAGGAGGGGAGGTTACCACATTCCAAGGTC
AGGGCGTGCTACAAGCCTCAACGAGGGATTACAGTGGTACTTACAGACGACCTACCAATG
AAGGATCATAAGCAGAAATCAAACCCAAGACCTTTTAGTCGATACAG
>comp573_c0_seq1 len=360 path=[338:0-359]
AGATGCCCTTAAAGAGACTGTGGGCTGAGCACCAAAGGGAGGCCATAATTAAAAACACTC
CTATCCCATAACAGGGCTTCAAAGCCGTAACCTTAAATGTACGGGCATCCTGCCTCTGCT
AAATACACGCAATAACAGTATAAGTAGCACACTGCCGTAAAGCTTTACCCTCCTTAATCT
TACCAAAGGCCTTAAAATTACTTAACAAACTGTTCAAATTTAAAGGGAGTGCCCAAGCTT
CATTAAAAACTCCAAAAACCTAAGTTAGATGGATGTATCTGCTGGGCTGTGTTAAAACAA
ATGAGCAGCCATTTCCAATTTAGAGCTACACAAAATGCACATAAAAGGAACAAGAGTTTT
>comp574_c0_seq1 len=302 path=[1:0-301]
GGCCGTATCCGCCGCCGCCGTGGTGTCCGTGACCGCCTCCGTTGAATCCGCCGCCTCCGT
GATGTCCGTGTCCGCCGCCTCCGTGGAATCCGCCGCCTCCGTGGTGTCCGTGTCCGCCAC
CTCCGTGACCGCCGCCTCCGTGGAAACCGCCGCCGCCGCCGTGGTGGTGTCCGCCGCCGT
ACTGCGGCAAGGGCTCAGGAGCGCCGAGAGTCAGCGCCACGAGAGCCACCAGAGCGACTC
CTAACGTCAAAAACACCTTCATGTCGTCTGTTTGTCGATATCAACTCTTCAACGTCCACT
CG
>comp575_c0_seq1 len=432 path=[433:0-257 691:258-282 716:283-431]
GGATTTTTCTGGCCCAATTCCACACTGCACTGCCCATCTCCACCCTATGTGAAATCCTTA
TATCCTTATATGTGTTGCCATTTCTCACACATCTATTGAGAAAGAAATCAGTATGATATT
TCAAGAGACATAGACTATATGCTGAAAGCTGAATATTTTGAATATATACATAGTGGATTG
ATAAATGTATATCAACCTGCGGATTCATGATAACATGTGAGGTGCAGAAAGAGTGCTAAA
TTTGCTCCAAGTTCAGGATAGGTGTCTGCTTTCAGTAATTGTGATATTCTAAGAGACATA
AGACTATATGCTGAAATCTGGATATTTTGAATATATACATAATGGGTTGACAAATGTTGA
TCAACTTGTCGATTCATGATAACATGTGAGATGCAGAAAGAATGCTAAATACTTGCTGCT
GCAAGTTCAGGC
>comp576_c0_seq1 len=573 path=[551:0-572]
GACCAATAAAATTCCAGATTTGTTTTCACTCGAGTCTTGCTTTCACTAATGCAGTGGTTT
TATATAAGAAACTCCCATTCAATTAACCTTTCTGGAAATACGAACAGGGAAAAAAGAGCA
ACCAACTAATGGAACAACAGAAAGAAGAATGTCTTCATCTTCCCATTTACCATATCAAAA
AACCATATTTCAATCAATGGCAGAAATATAAGATCTCAAACCTTCAAAAAAATAAATGTC
CTCGACATTCATACATAAAGCACAATCGAAAGAATTACAGTTGAATTATCTGTCACCATA
GTACTCATCATCAGGTTGAATTGAAACAGGCCTTCCAATTGTTTGTCTGGAATATGTTGT
GCTAACTAGACTAGATCCTATAGCACCAAGCGATACATGCTTGACAATCTTCCAAGAGGA
AAACATAGAAAAGCAGCCCCAGATTACAAGCATATTATTCAAATAGTGGCCATTTGTATG
TATAGCTTTGGTGCAAGCATAATTCCAGTCCATATTACACTACAAGGATGAATCCAATGG
CCAATCAGGCCTAAAGGTACTAATCATTCAAAC
>comp577_c0_seq1 len=355 path=[221:0-354]
GAAACCTGCAGTGCGTAATCACTAGCATACACAAAGGTGAATCTTACAGTAAGATGCATT
TCTATCCTTTAAGTTTTGGACACAAGTATAACTTGTTTATGTTTTTCAGTTTGAGTTACT
ATTCATGAAGGTGTATCTTACTGTATGACGCACATATAAATTATCTAACCAAATAACTCC
ATTTACTGAGATTGCTTTGTTCAGATACAACTTTTAGCTAACGAGACACACACACAACCC
AATACCCTAGACTCTGATCATGTTACCTTCTGTTCATTCATATATCTTGAATTCATACAG
ATAATTAAATTGGTAAGGGGGGACAATACTAACCAATGGTCTGCAACTCCTGGAA
>comp580_c0_seq1 len=579 path=[1:0-578]
AGTCCACTGAGGAATTAGATGGTACACAGACCGGCCATAATACTGTCTCGTTCGGGAACA
CGCTTTGAACACCATAAAGAAGGGCCGGGTTTAGAAGAAATAAGCCCTGATTCTAAGGAA
CTTGATCAAAATGAGATTCTAGCCGTACAGATTGTACATGTCACGGTCAAGGGTTAAAAG
CATCAGTAAAAAGCAGTCAAAAGCAATATTTTCTACTGTTACTGATTGTACTACGTATGT
ACTCTGACCAAATTTGTAGTAGTTGACTTCTGATCTGCTACAACAAACGGCTGTAACTCT
GTCCCGTGTAACTAGAGAGCTTCCTTCCACTGCATAATGCATATGCATGCCTCGCTAAGG
CTTTCCCAAATCCCACCAATGCAGCCCCAGTGGTAAACATCAATAGCTACTATAGTAATA
TTTGCTTGCTAGATAGCTTTACCCCATGACTATGTGTGACACAAGAAACTCACAAAGTGA
GACTAAGAAGTGCATGAATCATGAAAGAAATTCAAGTGGAGCTTCAAGTGGAGTACTAAA
AAAGAGAAGACAAACCCTTTGACAAGCTCAACGAGTTGA
>comp581_c0_seq1 len=385 path=[410:0-384]
GAAAGAGATTTAAATGAACGTTAAAACTCAAGGAAAATTTGAAATTGGTTTTTGCTCTAG
AAGAGCTGAACAGGATATATGCTTGATAAAGCCAAACCCTTTTTGGTGCTGCATAATGAA
ATGTAGGCGTGTGCCATCAACCACAAAGGCAATTTTTTAACTGATTCGGCATTGCAGGTC
ATGATGGGACCTAATATAAGTATTCACAGTTAATTTTCAATAACCAAATCATCCTAAAAG
CTTAAGCTGGCAGGTGGAGTCACATGAATAAAAAAATTTCTACCAAAAATTAAGTGAAAC
TATAAAGAGCAGCGAAGTATAACCAAGAATTTTCTATTATACTTATTATTGTTAATAACT
TGTTAACTATGTTTATTTTGGACTT
>comp582_c0_seq1 len=937 path=[801:0-556 1358:557-580 1983:581-936]
TAAAAGTCATATTTCACTTGATTTTATTGCATGTTTAAATATTAACCTTTCACGCTATAA
TTAATAGTGGCCGATGATAGAAATTGGGAGAGGATCAGGAGTCTGATCAACTAAATTCTT
CCATATATTCTCGAGGCATTTATATTAGATTTTGCCAGGAGCGCCGACGGGATCTAATTC
CCAACAAAATAAACCAATAAATAAGATATTTTTTTCAAAATAATAAAATCAAATAATGTA
AAAATAATTGTGAACAAATTCATATAGCTCCTACTTAGTGATAATGATGAATTAAAATTT
GAAAATCCTTTTGTGAAAATCACTTTAAAAATACTCTATTTTGTTAAATAATATTTTTTT
CATTGTGAAATCCATTTTCAAGAACCTTTTCATATGAAAAAACAAATATTTTCTTGGAAA
TTCAAGTTTCTAACTCACCATTTTCACTCCTAATAAATTGCGGGCTTGCAATTTATTCCC
CAATAATGGCTATTAAGCCACTCATTCTCTGTTTCGGTTATTTATCACCTTTTGGTAATA
TGTCCGACAAAATGGGACATAAAAAATATAAAAAATAAAAAATATTTTGTCTTAAATAAT
AAACGATCAACTTAATTAATTTAGCAAATAACTTTAAATTAAATAAGTAACCGTTCTCGG
AACGGACGATATAGGGTGATAATACTTTCTGTACTCGTAATCAACCTCTGAACTTAAGCT
CTGCTACGTAAACTCCCTTTTTTAGGTGTTCAATCGCACAATTTCATTTTTTTATGGAAT
AATCGATTAATGGCGACTCGCAAATCATTTTTATTTATTTCTCTTCCAAATTTTTTATGA
AATTGCCTATTTCGCAGCATGTTTTTCCTTTCAAGTAGTTGAATGAGTTTTTTGCCAAAA
AAAGAAAAAAAAAAGTAGTTGAATGAGTTTAACTGAG
>comp583_c0_seq1 len=308 path=[595:0-307]
GGTTTTAGTATATTAGGTAACAAAATTAACAATTCAGCTATCAGATAGCATATAAGATCT
AGAGGAAATTGACTAGTGTCATACATCTTAGCTGCACAATGGTGAGTCAACTAGTGAGTC
ATAGTTTTTAATTGTGCTCAATGGTGTGGTCTCGCGAAACGGCATGACCTTTGTGTGGCG
CCTTCTCAAAAAACTAGGTAGTGCATGCACACAACGTGTGCCATTTCCCGTGGTTTGTGG
CACGCGTTATGCGTGCATCAGTGAAAGCAACCCATTTCCCTGTCGTTTGTGGCACGCGCT
ATGTGTGC
>comp583_c1_seq1 len=320 path=[298:0-319]
GTTACCTAATATACTAAAACCCATCCATATATATGACTACAATCAATTCTTAACATAATT
GGTCAAACACTTTCTCCTTTTTTCCCGTGTTTGTGTTATAATTTAAATGAAAACTGAAAT
TGCAAAAAGGGACGCTGCCTTCTGGTAAGAGGAAAAACTGCATCTAAGTTTTTTGATCAG
GCAAATCAGATTCAAAAGATCTGAGTCTGCATCCCCCACCCCCAAGAAAACTAACTCTCT
CTACCAAAAGAAAGATCAAAATCTACTTGACAGGAACTCTTTTTAACACATAAGCATGTT
ACACCATTAAAATATCAAAT
>comp592_c0_seq1 len=420 path=[1:0-419]
GGGTACTTGACCCCTGAAGATGACCAAATATAAATTGTGGCATTGGACCACTTAAGGAAA
AATAATTTGTTGGGTTTGTCCTAAACAGGATAAAAGGTGATACTGAACTCACTGATTCAC
CCCAAAAGAATTGTCTAGTGAATACTTGATCCCTGAAGGCAACTAACATAATTTGTGGCT
TCGGACAACTTATAGGAAGATAACTTATATTGGTTTGTCCTAAGCGGGGTGAGAGGTGAT
ACTAAGCTTACTGATTTATCCCAAACTATTTGCCTAGTGGATACTTGACCCCTGAAGGCA
ACTAACAATACTTTGTGGCGTTGGACTTTATTAAAAATAAAAGACTTTGTAAGCATACTT
TAAAAAGGAGGAAAAGCGGTACAAAACCTACTGATCCCTCCCGAAAGAACTGCCTAGTGG
>comp592_c1_seq1 len=704 path=[1476:0-703]
GAAGGCAACTAATGTAAATTTTGAAAATTGATTGGCTAAAACAACGTTATTGAACTCACC
TAAACTTTGCTTGCAAGAATTGAGAAAATAATTAACCTGATTTCCTTGCTTTGTTTAAAA
ATGAATAAATAAATAAATAAAACAACCAGACATACATTGATTACGCTGAGTAAATCACAC
TTACTTAATCAAGCATAACTAACACACTAATTAAAGAAACAGGCAAAAACACTAGACAAT
GTCCAAATCCTAATGCACAACGTGACATAATGATTGACATAAACCACCCTTGGCATACAA
ACATCTTTCCTGGATATCAAGCAATCCCAAACATCTTCATTCAACCTATACAGACTAAAC
TATTTCTCACATCAATTCATTCACAAATTGCCAATTAAACCTTTTACTTGTTATTCGTAT
TAAGTCACAAATTAGCAAGGAATAGGATTAGATTCTTTTAACCAAGAGGAGACAACGAAG
AAGGGAAACTGTGCTACGTGTCATGCCATAACAGTGGTAAGCTTAGTTTGATTGCAGGCA
GTATTTGTAGGCAACATTAGAGACCAAAACTAAAATAGTAAAACCTTGGTGCTCGTACAA
ATATTTCAATAGATTAACCCAAACCTGAACTTGCCACTTTCTTAGGCAGCACCTTAAACC
CACCAAAGCAAACTACAATCCTAGCATTTCAACTAAAAACTCAG
>comp595_c0_seq1 len=572 path=[369:0-571]
AGACTTCTCCTTAGAGAAGCACAGGTAACCTACCCTCCTAGGGTCCTTCAATAATTATAT
GCAATTAATTGATCGTGCCTTTCTCTTTGCTCCACATGAATAAAAGATGCTGTATCTACC
TATATTTAATTACTTATTGTTTTCACCATTTGCATTTGTGAAGGCCTTAATATCTAATGT
AATACATCATGCGTTTTGAAAGTGTTCTATTGGAACTTTAACCTTTTTTTTTTCTTCCAA
TTTTTATATGGTTTTTGGGTCCAACAAGACAAATGATCAAATTGAAAGGCAACTAAATAT
AGCAAGACTGATGCTCAACACAAAAGTATATGATTACTAAATAAAACTTATTTTATCCTG
GACATTGTGGGGAAACAATTGTCCAGGAGAATGCTTGCTTGTCAACTTGTGTGATTCATC
CTGTTTGTCAAAAAGAAAGATCATATGTCAGATACCATGAGCCTTAGGGTAATGTGGTGC
ATTGGGATGAGAGTTTTTGCCATGTTATCTATAAGAAAGCCTATCATTTGTATTTTTGTC
AGCCAGGCATACCATTGCTTAGGCTTGAGCAT
>comp597_c0_seq1 len=471 path=[1:0-470]
GAGGAGACCAGTACAATAAGCGGCGGCATAGTTGGTCAAGCCAAGCTTAACACCATAACG
TGGTAGTTCATGGGCATTTGCTTGGCACAAGACAACATCACCTTGGATCTTGGCTGCAAC
AATTTGGGCCGTGATATCCTTGTTAGAAATTCTAACAACTAGCCTGTACTTGGGTGTGTT
GTATTTGTTCTTGTCTTGTACAACAAGCCTCTTTCTGGCATAGTAGTCGGTTTTACCCTC
TCTCCTCCTCTTGAATTTGACTTGAAATCTTTTGAAGTATGCCTTGTTTTTAATTCTCTT
AACGAATGCCATTGTGTATGAGTTTAGACAATTCTAATAGTAGATATCTAATAAGATCAA
ATGATTGATTCCAATACCCTCAATTAGGTAATAATAATAATATTGATACCTCAGGGCAGC
GAATGTCCAATAACTTTCAATGTTGAATTCGAAACAACGTGAATAAGATCG
>comp597_c1_seq1 len=462 path=[1378:0-461]
TCCTTCTTCTTCTCCTTCTTCTTTTCGCGATCTGGATTTGATCTAATAGCAGCATGGGCC
TTCTTGTACATCTCTTCAATGTTGTCGGCATTGATTCCCTCCTTGATATATCTTGAGAAT
TGTCTCTTGTAGGCTTCCTCGTCTTCCTCTTGGAGAGTACGCATGTATTGTCCCACATGC
TGACCAAAGATGTGATTGCGATGAACTTCGGCATTGAATTCTTTAGATTCTGAATCATAG
CCTGGGAATCGCTTGGTACTGTGGGGAATATCAATACCACCATCACATGCGCCCTTCATG
ATGCCAAAAATTCTGGCACCAGTCGAGGTACGTGCCAGACCTACATCGAGATAAGCTCGG
AGTGCGCCTGGTTGGTCGTCCTCGTCCTCAACGTTGAATTGTTCGCCGTCAACCTCCTTC
TGACCCTCGTATGTCTTGTCGAGCTTCAATTGCTTCAGGACA
>comp598_c0_seq1 len=476 path=[1:0-475]
ACCGCCCTCCGTGATCACACTGATAGCTGGATTGAAGACCAAGAAGTTTTAAAAAGATAG
CTGTGGGTTTCTACACTACTCTCTTCAAAGAAGAAGTGGAGGATCAGGAGCATCTAATTA
CCAGAGCATCTTATCCCATTCTTGATCCTCATGTCCTTTCCAGGCTTGGCACCATATAAA
AGAAGTGGAGATAAGGAAGGCATTGGACCCCTAAAAGCCCCTAGAATTGATGGGCTTCCA
GCTATTTTCTTCCAACAACACTGGGAAATTGTGAATAACTAGGTTTATAGCATCATATCA
AGAGCCTGGAATAACCATAATCTTATCAGAGCGGTCAATCAAACCCTTCTAGTCTTAATT
CCAAAAATTGACACCCTATAATACATGAACCAATTTAGACTCATCTCCCTTTGCAATGTG
GTTTATAAATGCATAACCAAAGTAATTGTAAACCGTCTAAAACACATCATCAACAA
>comp599_c0_seq1 len=325 path=[508:0-142 206:143-324]
CTTTTGGTGAAATACTTAATTATCTTAAATTCTTAATGTAGCTTTATTTGAATTTATATG
TCTTAATTGCTTAAACCTCAGCAGACAATTCTGCTCTGCCCTTCTTGTGTTGGTTATAAA
TATTGTGGACCTTGCAACTTTAGTTGTTGTCAAGATTGACTTGTATGACAGAAATGAAGT
ATCACTGTATCAGGGAGAAATAGGCGGTTTTAAGGCTCCACTGTACCTGGAAGTAGCTAT
AATAAACATAATGTCATTATTTAGATGTAGGGTGATGGTAATTCATATGGCATTCTGCAT
CTCTTAATATTCTTTAAGAAAGCCG
>comp600_c0_seq1 len=305 path=[1207:0-304]
GGTCCTTCCACTTATATGGTCCTCACTTATTTCATTCCTTCTCGATGTGGGACTTCTTTC
ACTCACACTTGAATTCCTAACACTTGGGGTGTGTCCTGCCACTTTGGAGCAATTTTTAAT
GGTTTGCTATAAAGGTTTTGGTAAAAACAAGAAGACCAAAATTTTGGGGCAATGTGCAGT
TTTTTCTATTATTTGGTGAATTTGGTTGAAGTGGAGCACACACATCTTTAGGGTTGTCTT
CTTGCCCTTGCCTTTAAATCTGCTTTGGCATAGGATTATGCTTTTAGCTTCTATTCGGTG
TCCAG
>comp600_c1_seq1 len=479 path=[457:0-478]
ATATATATACACACACACACATATGCCACTTTAAACATTAGTAGATATTAAATAGATAAC
TCCATACTCCACAAATAGCTAAATGTCACTGGTCTTCATCAGCTTACACTTTACTACTTT
CTCAATCCACAAGAAATGAATAAGTAATGCAAACATGCATTACATGATAACATTGGTGAC
AGATATAATATCTTCGGAAACAGTGCCCAATCATCAGTTGGATGTAAAGAATTATGCAAA
AATCTAATACAATGTTAGTGGAGCAGCCAGGTACTTTTTTCATAGAAAAAAATCTTAAAA
GAGAAGACAAGTAAGTAACATAAGAGCAAAGATAAGGTATCTTCAAAAGCATAAAAAACA
AGAACAAACATAAATGGACAAGAAGAAAACTAGGAATATAGCATGGCTTCCCAATCCCTG
CATATCGGAGATGGAAACACCCTTGAATCGGCCATGGGCTGGACACCGAATAGAAGCTA
>comp602_c0_seq1 len=633 path=[611:0-632]
GTCTTATCCCCTGCTTTTGTACTTCTCTTCTTTTTTTGATTATCCTTTATAATAAAAAAA
AGGAGGTAAAGGATTGAAGGAGATATATTGCAATTGCTTTACTTGAGGACTGTGAGCTTC
TTGGAATTATATAGGATTGAGGAGGAACAGCAATGCATTTGGCAATGATTTTCTTTCCTC
TTATTTTATCTATCTTGTATTATGCTCAATTATATTTCCTTTATCATTTAGGAGTACATT
CTCACTATGGTTACCCTTGAGAGTTATTTGGCTTGCTATATCAATGTTGAGCTAATTCTT
GGATTAGTGCAAAACCTGAGTCTAGAAATTGCTTTTGTTTTGCTCTAAAGTTAACTGCGT
GATTAAAATGTTATTTATTTGGCAATAGGTCTTTTTTAATTGCTTATATTTGTTTGTGAA
TAACTAAATCATGACTTAAAAAGGTTAGTTATGTACGATCTCTAGTTCCTAAGTCCTAAA
ATATTGATAGGCATGCATGAGTATAGATTACTATTGGATTGTGTACGTTTTAAGGATTTT
CTATGTGGAAAAAAAGTAAAATTTATGATTATTTTTACTTGTAACTAACTTCAGTCCTTG
GTTGGAGAGAGGGTGTAAATATCTGATTCTCAG
>comp602_c1_seq1 len=1060 path=[2258:0-1059]
GCCATTGCAGATAAAACCAACCCTAAATAAGCAAAAACATCATTAATTGGCTAAATAAAT
ATTGTTTGCCGAACCAGTTATCCCTAAATAAGCACAAAAATATCAATTAAAACCTTCAGT
TTTAAGCAATTCCTCATATATAAGTCTAGCAGAGGAGGAAAGATAACAAATGTCTGGAAA
ATAACCAACCAGCGCAACATATCCAGAGAAAGAACAACTCCAAACTTTGCTTTTAAAATC
TCAATAATCCAGCACAACACAAATAAATTTAAACTGTTAATCAAAATGGCAGGATGGACA
ATGAGGAAAGAGAAATAAAGTTTTCAAAATGGAGGCACAGTAACACAGAAGTAAAAGCAA
GGTGGTTAGAAAGAGAGGATGACAAAGGACAAAACTGATAACCAGAGTCTTATAAAATAT
TTTTGCCCTCCCTTCCACTGTTATGAGCTAGCTTCATCTTGATTCTTGCAACCTAAACAG
TTGTGCAGTGTACATGATATTATTCTTCACATTCTAAGGGACAAATTTGGTATTGATTTG
TATTGGTAATCTAGCTTTGGTGACAATGTAATATCATTCTATTAAATTGCAAGTTTATTC
AAATAGCTCAAATTTTTCCTTGTCCTCAAAAGATATTTAGATGGTGTTATTTGCTGCATA
TGGAGCCAAATATACAAGTTAACTTGGTAAACCAAAAGCTCATAAGGAAAAAAAAACAAT
GATTTGCAAACAAACAATATTATCTCTTTGATGTAAAGGTGATATGCCCGTACAAAACAG
TAGGCTACATGTACTTCGATGTAACAATCATATAACTCCTACAATTGATTGCAGATAGTT
CTGTTTTATCATGCATTAGATGGATCTGTTTCACATTCTATCAGTCAACCTTGTGCATAA
ACTGTAATCCAGCACAGTTGGTTTAAAGCATTCACTAACTATATACCAATTTTTCTTTTC
TTCTGTTAAATTCTTTTTTAAGTCTTTCCTTTATTTTCTCTATCAATAATGGTTCAAGAA
TAGAAAGACCTTTCCAACAGCTAATACCACTGAGAATCAG
>comp603_c0_seq1 len=835 path=[1557:0-145 40:146-834]
TATCTCTTTCAAAAGCAATGGATCAAACTGAACAAGAAATTGGAATCAAAGTCTACAATG
TAACCCCTCCACCGCCACAAGATGGCATCCACCAACCCTCGGAGCCACCGTTGGGTCCGG
CAGAGCCCGGCCGGAAGCGGCGTGCCATGGCAAAGGGTGTCCAGAAAACCCTCTCCAAGA
CTTCATTGCTCGGTAACTTCCTCCCCACTGGAACTCTCCTCACATTCGAGATGGTCCTTC
CCTCCATCTACAAGAATGGCCAGTGCTCTCATGTCCACACCATGATGATTCACGTCCTGT
TAGTGCTGTGTGCCCTCTCATGCTTCTTCTTCCACTTCACCGATAGTTTTCGTGGTGCAG
ATGACAACGTCTACTACGGGTTTGTGACTCCAAAAGGGTTGTCTGTGTTCAAGCCAGGCC
TCGCTGTGGAAGTGCCAAAGGACGAGAAGTTCAAGGTTGGGTTCACTGACTTTGTGCATG
CGATCATGTCAGTGATGGTGTTTGTTGCAATCGCTTTCTCGGATCATAGGGTTACGAATT
GTTTGTTTCCAGGGCATGAGAAGGACATGGACCAAGTCAGGGAGAGTTTCCCATTGATGG
TTGGAATAGTGTGCAGCGGTTTGTTTCTTGTGTTTCCTAATTCTAGGCGTGGGATTGGGT
GCATGTCTGCCTAATATGTGTGTGTTGGTTATAGTCTTTTGGGATTTTATTTCTTTTCTT
TGTTTACATTATTCAATGGACTTTGTTTTCTTGTTTTTCATGTTTGGGTTAAAATAAAGT
CAAGGACAAGGGTCAAGAACGATGTTGTTTTGGTCCTGATGGATTAATATATTGG
>comp607_c0_seq1 len=303 path=[441:0-302]
TAGCCTATGAGCCTTTCCCTAAGGTATGAATTTGGGTCCATATCAAACCATTCCTAGTCT
TTCCTGGCTTGTCAAGTTCTTTGTTCACTAATTTTCAATTTCTTTTACCTGTAGCGTACT
ATCACCAATTACCTGAAACAGATATTTCACACCCTTGTAATATTGTTCTGTAGCATACTA
TCACTGATTGCCGGATACAGATATTTCATGCCTTTTGTAATATTGTTTTCAACCTTTTGT
GATAAACTAATGCTCATTTGGTTTAATTTTCCTTTATAATTGTTGAGTTGAGCTAATATA
GGG
>comp608_c0_seq1 len=316 path=[294:0-250 545:251-315]
GGCTTCCAATGAGAACAACTAATTTCTTAACTAGTGTAACCAATTTGTAACTATCTCTAA
TAACTACTGTGTGTGGCCTGTGGTATTGTCCTACTGGGATGTGTGTGTGGCTGAGGATGG
CTTTAGAGTAGGAGTTCACTCCTTGCTGTGTCTGGGCTGCATCTCAGCGTTGGAAAGAAC
AGAAGGGGCAATCCAATCATATGTAAAGGTGTTTCCTTCATTGGAAGAAAAAGTTTGCCC
AACAAACAGACCTAGATAGTAAGATAAGAAAACAACAAATTACCAAAAGAAAGAAGAAAA
TATAAAGGCGAAACAG
>comp609_c0_seq1 len=843 path=[6:0-842]
GTATCCTGGACCACAGGTATGAAATTTTCAATTTCCCTTTTTTCATGTACTGTTTTGTTT
TCCTGTGTGTTTTCTTGTTTTGGATTTGTCCCAATTCCAAGATGTTTCTAACAGTTCCAT
CCATGCTTTTGGATTTGCATAATAGACTTTGGAAGTTAACATTGTATTGTATCTATCACA
AATTTGATTGTCCTTTATTGCAATAACTGAAACAGAGTAAATTATGTCTCGTACGTGCAT
GTCTTTTGGACAGTAACTTAAATTTGGCATCAGTTTTCCCCCTCAATAAAGTGGTTTTGC
TGATTACGTAAGATGGAAGGCCATTTAATTACTACCTTTGAGCAAAGACAAAGGCTCAAA
ACCACCTCTGACGATACAAAGTGCCTACTTATCAAAATAAAATGCGGTCTTCGAATTTTT
TTTGTTGTTTTTCGTTTTTCTTTCACAAATGAAAAATATGTGGTTTACTATTCTGTAACT
TGTCAAAACTGGAAGCAAAATATATTTTAATTACATTGACCCTTCTGTTATAGATCAAAG
TCAAAGTAAAAATGCAATGCAAATAATTCTTTTGTTGAAATATTGGTTTTTTGCAACCAT
AAACTCTACCCCCTTAGTTATAGCACATCCACCTGAACCTGAAACTTCTGCTTTAATGTT
TCTTTGGGAATAATATTTGTGCATCATTGTCTTGTATATCATTTGTTTACATCACGTTCT
TGCACAAGAATTGGTTCCTGTGCAAAATATGCAAAATCCAGACACTTGTAGCCCTCTGTG
TAGGAAATGTATCAATTCCTCTGCATGAATGTGAGATTAAGAGTAGTGTAAAATTGTTTA
AAA
>comp610_c0_seq1 len=634 path=[1:0-633]
GACAAGACATTTACTTTTTTTGTGTTTAAAAGAAAAAGCTTAGCAAACTGCTTACACAAG
TCGAGCTAGAATTGACATATCCAGCAGCTTCCACATAATTAATTTTGGTGGATATAATCA
TCCATGGTCTTGCACTCAAATAAATTCTTAATAGGTTTCTTCCTGTGGACTGTTATATTT
TCCCTCTTTCTTCTTCTAATATATTAAGGGGCTCAGGTTCCATCTATTTCTCAATTTTAC
ATGCTTGCATAAAAGTGCCCTTTTGTCAATTGCTACAGGGTTTGAGGAGTGGGCAAAAAG
GTTAAGCTTTTCCAAATCACATGCCTAATTCATAATGCAATTTATCCCTAATGTATTTTC
TGCCAAGAGTCTAGTAGATCCAAGGATAGTTTTGGTAGGTGTTGATACAGTCAGATCATG
CTTCAGAGATCAATCCACTAGGTCCTGTCTCAACATAAGGCTTGCAGCCAAGGATAGATA
TTGATAACATTCTTAACGAATTCAATGAAACACAAATATAGGATACACAGTTAAACACAC
GCTTGACTCTGAGGTTGTCCTAAGTAACTGAGCATATACGAGTTTAGGCATAAAGTGAAG
TGGCTCTCTGAACTTAGGAGAACTAAATAACAAG
>comp611_c0_seq1 len=571 path=[887:0-570]
AAATAAATGTGTTTAATATTTAGTGTTCTGTTTTAATGCTTTCGATTATGATATTCTAAC
CTCTTCGTCACCTGCTTTGGATGTTTGTGCATTGGAATGCAAGTCCCTTTAATTTCTTCC
TTCTTTTCGTCCTTTTTTCTCTTCACTTTCTAAATTGTTTGGATATTCTTCATTTTATAT
ATGGTTCTCCTCTTCAGAAGGAAATAAAAGTCATATAGTATCTTGCTTTTGTCATAGGAA
TTTCCAATTAAAATCCAGTTTTCATTAAAACAATACATTTCCATTAAATAATTGAAGAGA
CAGACAGAAACTTTCTTTTGCCACATCAACAAATGGTTTGAAAAGAGAAAATAGGCAAAA
GAAAAAGTAGAGAAAACAAATAAAGAAATTCCAAAACAGCAAAGCAGCTCCCAATGGAAA
TTTCAATAAATATCTATAACTTTAGGTTGAATTGGTGTTTCTAAGTTAACTCACATTAGA
AATTATCAATTAGTTCAGCTAATAAGATTCATAAAAAACACAATTGATAAATATATTAGT
TTAACATAAGCAATATATTAGAAGAGTAGAG
>comp612_c0_seq1 len=536 path=[261:0-535]
AGAAAAGGGAATATATGCACTGAGCTTGGTTTCAGTTGTTCAATAACAATGCATAATCCC
TTGAACCAATAAATATGGCTTTTGCGCCTTATAAATGCATAATGGGTAACCTGTTTATAA
GACTGAGCATAAGTCTCCTTCCTGGATAATGAATGTAATTACCGTAAAGAACCATTAAAT
TAAAATCTCAACCTGTTATCAAAAAATACATTTATCAATGTATATATTTATGCACCCATC
ACTTGCAAACTCAGGAGGATGTAAGTACTTGATATGTGATTACTTGAAGATTTGGTTAAA
CAGAGTTTAGGTTGCCTGATGTTTGTGCTTTGTTTGTGAAGAACTACTGATTGTAGCTTT
TTGCTATATGAAGATTATGGTATATTCTGTTTTACAAGGTTCAGAATTAAGGACTTCATT
GCTTATTATATTATGATTGTAATCGCCATGGAGTTTTGCTCCTAAGATTTTTGTTTTATA
TTATGATTGCTATTCACAAGTTTACTTTGGGCAGGTGCCAGATATTATTGACAATG
>comp613_c0_seq1 len=421 path=[475:0-176 254:177-420]
AGACCAGATTGAGAAGAAACAGATGAGCCTTGAGATTTAAACTGCATATGTAGTAGCATG
TCTTGCAAACTATATCTTTCAGTTGTAGAAAGAAATCAGGTCATATAACGAAAAGCTCTA
TATTATCATTTAACTGAAAATATAAAGTTAATTCACATAGGAGAATGTTAGGCCCAAGAT
ATCCAAAGTATACTCTAGGAGGGATAAAGAGGACAAAAAGGGAATTGGGCTTTAATGAAG
GGTATCATGGGGAATTTCTATTGTAACAAACTGCTGGACAGGGGTGTGGGAAGGGAGAAA
CCGTTAGAGGAGAGAGGTCAAGAAGGGAGAGAGGGAGGGAGTATCAGCAGAAAAGAAGTG
AGTAGAGGGAATTGGGTGGGAGAGACCAGGCACTCTAGAATTGCCTGGGATATCTTGTAT
T
>comp615_c0_seq1 len=1024 path=[1412:0-636 411:637-1023]
GCTCCTTTTGCTTGCTTAATGTAATCTCTTTGATGATACCCTCCATATCTTTTTTAATTG
ATGTTGAATTTCAGAGTCCAAAGCCACAGATTTTTTACTAGCTAGCTAGTGTGCATCTGT
ACTCTGATCTTGAATTCCCTGCCCTTTATCGATGCCAACATCGATCTAGCCAACATGAAC
TAGATGTTTTACACATGATAATTAATGTTGATGACGATAATCATCTAGAGAAAAACAATC
ATTTAATTGAACTTCAGTGAGAATGTAAACATGACTCTTAGATGGACCGTGTCTTTTTCT
TTTGCTTTCTTTCTCACTTTAAGAAATTTGAGCTAGATGGCCGGTTGCCCCTCTAGCATT
CCCTTCACTTTTTAGTAAAAGGCTCCTTTTTTATCACATAAGATTTGAAAGGGAAATTGT
AATCTCATATCTTCATGCTTTTATTTCCTTTCCTTGTGTTTGTCCTCTTAGGTTGAAAAC
CCCAGAATATGAATAGCATAGGAATGAATTGTCAGGTGTGTGACAGGATGCTGATGATGA
GAAAATCACAGTATACATGATAGGGCATGTAGTACAATATCTACCCCCCAATCAACTACT
TTTGGAGCTATAGAGAGAGTGAACTGCCACGGTAGGGAGGAATAGGATAGCCGAGAGGTT
AAGAACTATTCAAAACTTTGGATTCTCCTTTTAAGTGAATATTCAAATTTTAAATAGATG
GATACCCATCACCAAAAAAAGAAATGGATACCCAGAGAGATGCATAATTCACCATTCCTG
GGGCTAGCAGTAGCTTTTTGACGAGGATTTGACTCGTTAGACCCCATCACTAAGATTAAC
AATTATTTGTGACAATGGCCTCGGCTTGGCAAGTAAAGGACAATATTGCTAGGTCAATAA
AGCAGGCTTGAGGACTAATTTTGATGGCCTATTCTCGAGTAAATTTTGGATTAATTAGAA
ATGAACATGTCTAACTCAAACTAGTACTAACATTTTCCATTTGCAGATGCATATGTGGGG
GCAT
>comp616_c0_seq1 len=305 path=[351:0-304]
AGTTTTAACACTCTATTCATTGTTTTTCAACAACATGGTCACTTTGGCCTTGGCCTATCT
GAATCCACTCCAAAAAGCCCGAACAGTTATTCTTGCTGAGGACTCACAAAATAAGTCTGA
TGGAGATGTCAGTAATCTGGTGAATGAGTTAAGTCCCAAATCTGCTGGCGAGGACAGTAG
AAAGAAGGGAATGATTCTTCCTTTTCAACCATTGACAATGACATTCCACAATGTCAATTA
TTTCGTTGATATGCCAAAGGAGATAAGAAAGCAAGGCATAACAGAAACTAGGTTGCAGCT
CTTGT
>comp617_c0_seq2 len=1210 path=[2106:0-314 24:315-1209]
CTCATCCTGGGTACTAATATCTTGAAAAAAAAGATAAGTACCGGAATAATTTTTCATTTT
CTTTGGGTCCTTTTCAGCTTCTGTTCTGTCTTCCCGCTGCTCTTTTTCATTTGTTGCCTT
TTGGGCTCGTGGCTGCCAAATCTGTTGGGTGGTAATTGTGTTATTGCTTATTTCATAACT
TAGTTCCTGTGGGAGCTACCATTGCCAAAAGGTGTATAGCATGTTTGTTTTAAATTGATT
CTAACGTAGCACGGCGTTCAAGTCTGCTTTTACTCGAAGCAAAATTTCTTTTATTCTCAC
AACTGAAACAAACAGGCCTGTAATATGTGGGAACTCAGTTCTAGAAGTTATGTTGCCAGT
GCTGGAGTGGTAGTTGTGCTGCCGATGTGGTTATGCTGTTGGTGACTATGATATGCGATC
ATGCGTGTTCATTTACCCGTTCTCTTCCCTTTTAAAGTGGTTCGGAGCTGGTTGGGCTGG
ACTACCTGATCTTCAATAATAGCTGGTTGGGCTGACCTCCTGTTATTCAAACCTTAAAAA
TGGATTAGAGACATCCATAATTCCATATAATTGTAAGAAACCAAAGTTGGCTAGTCTACA
CGCATGGCGAAGACGAGTAAATGTTGACATTACAAATTCGCTTAATATTAGAAGTATCAG
TGATTGAAATAACAGTATTTTATTATACTCAATAGCGAATAAATTTAAATCGGTTGGAAG
TTGAAGAGATTCTCGATCCTATGTCTGCTAGTCTATACTTATTCCAGATACCTACTTTTT
CCAATCCCTGGTTTATAGTTCATTTGACAATCAAAACAAGTCCCGAGGTATGCAACTGTT
GTCAAGGATGATCTCTTTATCATGCTGTAGACAATATTCACGGCTGCCACCAAATGTCTC
ATCCTTTGGTGGCCGACAACGAATTCTCTGTTCCTCCCGCTGGGATATATTAATAGGGGT
TGCCACCAATAATCTGGACCGCTTGAGGAACGAAGATAAGAGGATAGAGGGCTTTCATCC
CATCTATGATTGCTAATGAGAGAAGGTACCTTGAAAGTCAAATCGTTCTGAATCAGGAGA
CATCGAACTAGATTTCTCAAACTTTTAGAGGGAGGCAAGTGTACTGCCACGGAGGGATAC
TCTACATTGCCTTCAAGCTATTTTATACTCTCTTGGGAGTTACCAGCAGTAGACCTAATG
GGCAGGGAAG
>comp618_c0_seq1 len=355 path=[367:0-354]
TTTTTTTATTATTATTATTATTATTTACCTGAGCATCAATAGGATTTTGAGCATATTCAA
TCCATTGAGCAGCAACCACCCAAAGTAACAACTCAGCCTATTTTAGAACATCTAACGCAG
CTTTGACAGTACATCCAAAACGTGTGTATGATAACAATTTTCTACTAGTAAAAAGAACAT
AGAAGTACATAGGGAAAAGAAAAAAAGAAATGTTTGCTTTCGCCCTGTATAATTCATGGT
AAAAGGAGTTGAGGTTCAGACTTTAGAGACAATGGAACACTGAACAATCATGTCAGTTTT
GGCTTTGTTTTCTGCTTGATAAAACATATATCAATATGGATTAAGATGACACAAA
>comp619_c0_seq1 len=521 path=[499:0-520]
GTTGGAGGGAGGAAGAACTAGGAACAACTTCTGATAAATTTGGTGTTTGTCTCAACTCTC
AATACTCAATAACCTGTTCTTCTTTTAACTTGTTTAATTTGTGTCTTCTTTTCTGGGGAT
AATTTATAGGGACCTGTACATAATAAGTTTTACAATACTTAAAAGTCATAGTTGTTGTAA
TTAGATTAACCAAAGCAATTGGCTTTCCTTGCTAATGAAGTTCTCCATCCAAGCTATGCT
TCTTTGGTTCCTTGTGGAATATTTGGACTTCCATTTTATCGAAGAATATATCGAGTTTAT
GGAACAGGTGAATGTTCTGGCAGTTTTGCTTCTATATACTTCACTTTTGTTATTGGGCTC
ATAATGTTCACATGCAATAACCTATTCACAAACAATCCCCTTGTAAATAAGTGTATAAGT
TTGTAGATTTATTTTCTAAGTCTGCTGATGGGTCCTTTTACTCTTTTCTCCCTCTGCAGT
TGCTTTCATTTTTCTCATATTGAATGAACCAATTATTGAAC
>comp620_c0_seq1 len=523 path=[1:0-522]
ACATGCTTAGGTTCCAGCCTGAGGTATCTATTTGTTGATTATTTGTTCAAAATTCTGAAC
CCAATGAAAATGGAGCAGCAGCAAGGGGTTAAAAGAAGACCAAAACACAAAGAACATAAA
AAAACTCAGCTCTTGCTGCTGCCGAAGAAGAGTATTGGAGCTTCTAAAATGATAGATAAA
ATGATTTTAATGGACCTTTTTTGAAAGAGAAGACAAGAAACTTCATAGTCATTAGCAAGT
CATTTATTAGCCTAGTCATTTTAAAACTGGATAGTTTAAGTGAGCCTATCCCAAGTAGGG
ATATTAGTGGATTTGGGTACTTCAGACATCTGACTCATTTACCTGACTTTGGAATATGTT
TTTCCTTCCAACGATTGACAATTTCATCTTGGGGTTGGATATCTAACTTTGATCGCCTAA
TAGCATTCATGCATGTTTTGAGAGGCATGTTATTTTTTATTCATTTGATGGACCTATATC
ACCCTTATCCTTTGGTTCGCAGGGAGGATTAACTCTCAGCAGT
>comp620_c1_seq1 len=396 path=[46:0-395]
TTCAAAATTCTGAACTCAATGAAAATGAAGCAGCAGCAAGAGATTAAAGGAGGCTAAAAT
ACAAAGAACATAAAAAAGTCAGCTCTTGCTGCTGCCAAACAAGAGTATTTAAGCTTATGA
AATGACAAGGTTTAAATGATTTTAATTGACCTTTTTAAAACAGGACACAAGAATTTTATG
TGCACTTGCAAGTCATTTATTAGTCATTTCAAACTGGATAGTTTTAGTCAGCCTAACCCT
ACCCTAGTAGGGATATAAATGGATTTGGGTATTTTGGTTATCTGACTCATTTACCTGACT
TGAGATATATGAATATAATTCTTACTTCCAACAATTAACAATTTCATCTTTGGGTTAGAT
TTCTTTCTTTGATCAGCATGCATGTTGAGTGAGGTG
>comp621_c0_seq1 len=478 path=[1:0-477]
GATTCTATTTGTGGTCGCGTTTTGTTGTTCGGTGGGATTCGGTAAAGTCGCAGATCTGGA
CCCCGACGAAAAGGCGTTTCTCATAGCGATTTCTATGGGCCGAGGACTCTACTACAACTA
TCCGCACGTCGTCAACCTGAACGCTTCCAACTTCGACTCCGTGGCCAAAGGGAAAAGCTA
CTCGTGGGTCATCGAGTTCTACAACAGTTGGTGCGGTCATTGTCTCAGGTTCACCCCGAC
CTACAAGAGACTTGCTAACGACTTGAAAGATTGGGAACCTGTCGTGAAAATTGCGGCCGT
GGATTGTTCCAACCAGCTGAACACTCCTCTCTGTCGAATCTACGAGATCCTCAGTTACCC
TACTGTAAGATATTTCCCCCCTAATTTCGAAAAGGATTTCTACGGGACCGACATCGTTAA
GAGGACAGTGGACGATCTTAGAGAATCCATTGTGACTGACCTGTTGACAAGGAAAGAC
>comp622_c0_seq1 len=610 path=[2200:0-609]
AGGAGATCGCCAAAGAAAACTTCGAAGTGATGGTTCTTTGAAGAAGTTGATAGTAAGCTT
TAAAATCAACCCTAATCAACCTAATAGTATTATCGCACAATTTTAAACAAGGTACTTGGA
TCGCTGGGCTTCTCCTTTACTTTGTGCAGAGTACATCAATGAGAGTTTTCAAGTTCATAT
TTGAAGGCTGGCATGTACGAAAATCTTGCGCATTGTTAATTAGTGTATTTGATAGCGAGC
CATTACACTGCATAGGTACTACTGCTGATCACATCACGAAAGTTACCCGTTATCAACGTA
GTATTGATTGTTAAAAAAATGCTTTGGGTTCCTACGTTAACCCAGAATGCACACAGGAAA
AAAGTCTTTCAGAAAACTGCAAAGAACTCCAATAAGTAGTAAATTCTCACTTTTTTATCG
TTCAAGTTCAGTTTATCGTTCAAGAACTGCAATAGCTAACCATGGCTGTGTAAAATGCAT
AACCAATTTGTTTCCTAGTGTTTGGAAGCAAAGGATTCGATCACATTGAATCGTGATTAC
CCCGTGCCTTGAGTTGTTGCTTCATCTCAAATCTACTTGCGGTAGGCATTTGTGTTGTTT
TTCCAAGATG
>comp622_c1_seq1 len=829 path=[1:0-828]
ATACGGGATGTAACAGACTTTATGAGTTTTCTGAACCTTGCCCACGGTAACAGTATCCCC
GTGTTGCGCTCTCCCAATAAAGAGAGGTTCTCCAGTTTCGGAGTTTCCAGCTGGGAAAGC
ATGTTCTGGAACTTGGTCACCAAGCACTGGGATCCATGATGGATTGCAGCCAGTAAGAAC
CTCATAGTCGCGGATTCCATGTTCAGCACCACCCCAAGCCACATAGCATACTCCATGGGA
TGGAACAATTTTTCCCGGAGTCAGAGCTCCTGCATGGTTGGCTCTGCCAATGTACAATTG
CTCATTGTCGAAACCACCAGGTACTGCGTCTGGTGGGATATTGGAACCTGATGATGGAAC
CCACGTGGGTTGAGCCGTTCCCATTGGCTCTGGAGGTCCGATGTTCCAACCAGGTGAATC
GTGAATTTCTTGCCAGGGAGTACTTGCTGGAGCACGCCATCCAGACCAGTTGTCTTCAAT
GATCCATGAGCCAGTAGCTCCCCACGCAGTTCGAATGCCGAAGAACTGGCCGTTGAGCAT
AGCAGGATCTGACCAACTCAAGAATGGAGTTGGGTTGTCATCAAGGCCTATGTTGAGAGC
TCCATCGTACCAGGTGATCCAAAAATCTTTGAACTCTCCAGCACTCAGGGTGTTTGGGTA
GGGCTGCTCAATAACTTCAGGTTTTTCACGATTCTTCCTGATGGCAATTTTTGAGTTTCC
CCAGCCACCAAAAAATATCTCATACATGGGGTTAGCTTCCACAGGACCCTCGGTGATCGC
AACATGAGCATCATTAGGTGCCTTTACTTTGAATTTAAGGGCTTGAGAG
>comp624_c0_seq1 len=319 path=[263:0-318]
ATTGTATTGCATCATTGGCGTTATATCCATTTTTATGTACTTTGAATAATGCGTTTGTAT
TGTTGGGTGCATGGGGGGCCACGTGTAAGCTTGACATTAACTGAGCATGATGAGTGATGT
CAGGGATAAAAACATCAACGGTCTCGATGCATGACACGCAAGAGGGATATGGGCCAGGTC
CCACTGTGACATGTAGGTCACGTATATGAATCACCTGATATGCTGACTGAGCTTGCTGGA
CCACCGATTTAAATCGAGTAGTTAAGATTTTGAGGGTGGGTCAAATATTTTTTACTATTA
AAGGAAAGCCAAAGTGGGG
>comp625_c0_seq1 len=745 path=[1:0-409 864:410-744]
GTTGGAGTTGGATTTGTTAGGTGCTGAGTGTTTATGAGTTCCATTGAATGATTAGATGGA
AATTCACTTGTATAGTTTTGATCATACCCGCAGAGGTTGACTGTTGATGAATAAATCATC
TTTGATGCTTAATAACATCTTAAATTTAGAAACAAAAAATAATGGTAGTTGTGTGAACGA
ATTTGGTTCCTGATATGTGCTACACGTGTGTTGGTCCATCAAAGCCAGTTTCTGGAGTAA
AAGTTGGGCTCTGAGTTTGGTTTCTCGGGATTATGAACGCTGTGGTAAGCTTTTCTTTGG
TCTTGGCAGAGAAGTCACTGCTAAGAAGCCTTTGGATTCATGCACGAGGGTTGCCCCTCT
TGGAGCTAATTCAATAATTCATGTGTTTTTGTCAACATAACTGAATGATTGGTGATAATT
GAACCTTAAATCTACGTCATGATTTCACAATACTTCCATAAATTGATTATTTGATTCATA
AAACATATACCAAGACTTCTTTCTTTTGCACGTTCCAATAATTATATGTAGACATGACTT
CTCAGGACCCTACAATTTCCCATTTTATGTACTCTTCAAGGTATGGTGTTTCATCATGTC
ATGACAATGTTAGTAGTTAAGGTCCTGAACCTTTGCTCTAATTCTGAATATTTCCTTATC
ATTTATCATACAAAGTCGGATGAGAATGTGGATGTTACCATATTTAGCTTAACTTCCTTT
TTCATATAATACACCATTACACCCT
>comp627_c0_seq2 len=500 path=[605:0-314 141:315-499]
TTATCCTGTCATCTTATCTGAATCTGAAAGTAGAGAAGCACATGTTCTGTTAAACTCTGC
GAATTGGAGAATTATTGTGTTGTTAGGCTGATTAAGACTGCACTTGAGTCAGTTTACTTA
ACTATCTTGCTGTGATAGACTTTCTTTCTGCTGTATGTGGCCAGATCTTGTGACTCCTAG
TTTAAGCAGTCTTTTTAGATGAGTTATTGAGCATGGCTTTTGATTAAGTATTTGAGCGAG
GGTTATATTATGTGTCTGGTTACTGATAGCTGAAACTCACCCTACGATGAACTGTGAATG
CCCTGGATGTATGACAGATGCCGGTTCATGTAATTATTATTGAGTTGAGGCTGGTGTGAT
GAGAAGTCAATAGTCAATCATATGTTTTGCTCTCAGAAATGAACTGGTGACATTACCCGG
CATACTTGTACGCGGGATGTAAGATCATATGAAGACAATTAGTAATTCAACACTGAATAT
TATTCAATCAAATAAACGAG
>comp628_c0_seq1 len=866 path=[1:0-865]
AAAGAGGAAAGAACAGGATTGCACGATATGGTTATTTTTCCAAGAAATCTAAAGGTTACG
CAAAATAATAATATAATAGAACATGGGCCTTTGGTTTGGAGTGCTATTGCAAGCTGACAA
GATGTTAAGTTGCATTCAAACTTAGATGGATAGGGACTGATAATTACTTAAGCATGAGTA
ACTTCTTTTTTTTCCTAAACAGATTAAGCATGAGTTACCTTTATGAGCTAGGTATATATT
ATATAGAAACTAGATGTGTGGCTGACTCGCTGTGTATCTTATAATTATTATTGCTTATAA
CCATGAGATTTACATTAATGACCACCAAGTAATTCAGAGGATCAAAATTTAATATACATG
CACAAAAAGGTTTCTTTTATATTTTTAATGAAGGGTCAGTTGAAAGCCATGGGTATAGAC
ACAGACATGATTGACGCATGACGTGACATGGACACAGCAACACGACAGAAGCCAAAATAT
AAGTGCCCCAAACAGCATGCACATATATATTGAGAAATTATTTAATTCCATAAGTATTGA
TATACATAAAGTATGAATGATGCTACCTAAAAAACGCAAAGTAATAAAGAAATTTAAATG
TATAGGAATCTTCTCTGCTGTTATTTAGGAGTTAAAATTTATATTAATACTCAAAAGCTG
TGGACCAAGCTCAATTCTGAATATTCATATATTCCTTTCATCCCAAAATCACTTTTCAGA
AGTAGAAAATAGAGAACAAGATGCGAAAAGACAGAACAAAATGTTGCACTCCTTTGGAGG
GATTTACTTCTTTATTCTCATCGTGTTAGAAAACTTGAGCAAAATAAACTGAAAATGAAC
AATTTCAAATTTGATTGACAACTAAG
>comp630_c0_seq1 len=480 path=[458:0-479]
ATGGGTCCTTCTGGTTGTGGCAAGACCACACTTCTAGATGCCTTAGCAGGTAGGCTGAGT
TCAAACGCAAAACAGACAGGGGATATCTTAATCAATGGCCACAAACAAGCACTTGCTTAT
GGAACATCAGCATATCTGACACAAGATGATGCTACATTGACCACATTAACGGTTGGAGAA
GCAGTTTACTACTCAGCTCAACTCCAGTTGCCTGATTCAATGTCCAAGTCAGACAAGAAG
GAAAGAGCAGACTTCACAATCAGAGAAATGGGCCTGCAAGATGCCATTCATACAAGGATT
GGAGGGTGTGGTTCTAAAGGCATTAGTGGGGGGCAGAAGAGGAGAGTTAGCATTTGCATT
GAGATCCTAACACGCCCCAGCCTTCTATTCCTTGACGAACCAACTAGTGGACTTGATAGT
GCAGCTTCTTATTATGTTATGAGCAGAATTGCAATATTAAATAAAAAAGACGGCATTCAA
>comp631_c0_seq1 len=721 path=[1:0-720]
CCTTCACCTAGCGTAGTTAAAAAAGAATAAATAAATAGTAGGGGAGCCAATCCATAAATT
AAAATAAAGAAGTATGTATGGAAAAAAAATGCACTCGATAAATTAGTCGCTTATTTTTTG
GGTGGGAACAAAAAAAAAATGGAGCAAGGAAATAGAAGAAAATGGTGTTGAATCGGAGTA
AGCATTTGCCAGAAGATTTGGTGGCAGAAATATTGGTGAGGTTGCCAGCCAAATCTTTTG
GTGCGACTCAAATGCGTTCAACGATCATGGAATGCTCTCTTGAGAAGCCGCAGCTTTGTG
ATGAGGCACACATCCACTTCCTCCCCGATGAGCGTCTCATGATCTTTTATAATGGTCCTC
AGATTCCTATACCCATGCTAATGGGGTTTGTCACTGGTTGACTGACGACCTTAGTGATGA
CACTAGTGCCACCCTTTGCTTTGACCTCAGCAACGACCAATTTCGGAAACTCATGTTGCC
AATCATCGATTATAATTGGCGTGGCAGTGATGAAATTCCTAGGGGGACTGACCCATTTCC
GAATATGAGGATTGGACTCGCCATTCAAGAATGGTGTTGGCATGATTAAATTACTGAGCT
CAATGATTCGATTGCTTATGATTTTGGGTCGGGAGGAAGATTCAATTATTGTCGGGTTGA
AATTTGGATTTTGAATGAGGGTGGTGTTGAAGGGAGTGGGACTAAAAAATACAACTTTGG
G
>comp632_c0_seq1 len=809 path=[787:0-808]
GGAGGCTCCAAGCAGTTACTGGAGATCGCCAGAGTTCTTAGCGTGGTTGTACAACGATAG
CCCGGTGAAAGACAGCGTTGTGGTCAACGACAGGTGGGGGTCCGACTCTATGTGTAAGCA
CGGCGATACTTACACTTGCCAAGACCGGTACAATCCAGGAACATTGCAACAGCACAAATG
GGAAAACGCGATGACCATCGACAAAAACACTTGGGGATTCAACAGGGCATCCAACCTACC
AGATTACTTGACTCCTCAGGAACTCATGGACGAATTGGTGTCTACTGTATCGTGCGGAGG
GAACATAGTGATCAATGTAGGACCAGCGAAAGATGGAACCATAAACCCAATTTTCCAAGA
CAGACTCAACGAAGTGGGGAAATGGTTGAAAGTCAACGGCGAAGCAATTTACAGCACGAA
GCCTTGGGATAACTGTCAAAATGACACTGCAACTTCTAACGTTTGGTACACAGTCAACAA
AAATGGAGCAGATTTGTACGTGACGATGCTGCGGTGGCCGAGAAATGGCGTTTTGGATCT
GGGATGCCCCGAACTCACCAGAACCTCCCAAGTTTCAATGGTCGGGCTGCCAAACGTCCA
GCTGAATGCAACAGAAGAAAATAACATCCTTCGCATCACGCTACCTGACAAAGTACTAGC
TCCAACCAACTGGGGATCAGTCATTAAAATAACGAATTTCAAAGTTCTCTGAACTAAAGC
GGAGTCTGTGGAAACGTGTTTATTTGACTCATCTTAAAAAGCATAAAATTCTACATTGAA
CCTGAAAACTTGATATTGTTACCTCTAAG
>comp632_c1_seq1 len=655 path=[1573:0-654]
CAGTAACTGCTTGGAGCCTCCCAATCTCCATCTGACCACAACATTTCTGGCTTGTAACTG
TTAATCAACTCTCTCATTTCTAAGGAAATTTTGTTATTGACGAAGTCCTGAGTGGTGAAA
TTGCTCGCCTTGTCTGCGAGGTACAGCGGGTGGAACCACTCGTAGAGGGAATGGTACAAC
CCAAATTTGACCTGCTTTTTCTTCAAAATTGCCTTCCTCAAGTCACCAACTATGTCACGA
TGAGGGCCCACATCCACAGAATTCCAACTGTACGAATATTTTGAAGGCCATAGAGCAAAA
CCTTCATGGTGTTTGCTTGTAAGGACGACGTATCTGGCACCTGAATTTTCTATGATGTCG
GCCCATAAAGAAGCATTGAAAAATTCTGCCGTGAAGTCCTTCGCGAAATCTTGATATGAA
AACTTCGGCTTGTAGTTGTTCTTCATGAAATTGTCAATCATTTTCCTGTACTTCTCGTTT
GGCGAGGGCTTTCCTTTCCAGTCGATCCAAAACCACTCGGAAGTATAACTGGGGACCGAG
TAGACGCCCCAGTGGATGAAAATGCCGATTTTAGCCTCATCGTACCAGGAGGGAAGCGGT
CTGCCGTCCAAGCTGTTCCAGTTAGGCTCATACTTGGTGACTGGTGCTGCTGCGG
>comp634_c0_seq1 len=328 path=[706:0-327]
TTTTTTTTTTTTTTTCTTTCTTCTGCTTTTTTTTTTGTGTGGATTATGCTACTGTCTGAA
TTTTCATTGCTGAATTTGATTCTGGATCGACGTGGTTTTTTTTTTTTTTTGTGTTACGGT
TTTTGTATCTCATTTTACTTCGCTTTCTTGGGGTTAAGATATGTGTGATTGGGAGGCATT
GGAGAGTGTTGCTGTGGTTTTCGCTAATTTATCAGTGATTGGTTCTCTTTGGCTGTTCTG
GTGTTGGATGGTTGCGCTGAAGTTCTGGGGATGGTTTGTGTGGTTTCTTTCGTCAACTTA
ACTTGGGTTCGTATGTGTGCACTACATG
>comp635_c0_seq1 len=320 path=[3:0-319]
AAAAAAAAAAAAAAAAAAAGTGGGACCAAAACTTGCAGAGCAATGTGGGGCACTAGGAAC
CCAGCTAGCTATAACTCAATTGTGAAATATCCAATCTACAGAATTCCCTTCCCCTTCAGT
ATCACACAGCACCAGCACCTGCATTCACAGTGACCCTGCCATGTTGGATGATAAACTCTT
CAAATAGGAGGACCCAAAGAGGGAGAGTAACATGGGAAATTCAATGTGGATGATTGGAAG
CAGAGGCAGTGACCGGGTCTCTCTTCATTATGCACTGTGTGTTTGGCTTTGGCGAAGGGC
AAGGCAAAGGTGAGTGCATG
>comp636_c0_seq1 len=304 path=[1:0-303]
GCTAAATAAGCTTTTAAGTTATAGCCTTGAATTTTAAGAAAGACAACTTCAGTTTTGAAG
GTTCTGATGTCTGCTTATTACTAGTGAAATTCTTATTTTTGCACAAGTAAAATAATAGCG
ATCCTCCATTCAGTTGAATTGCTCCTATGAGGTGAAAATGTTTGGTTGCTTAAATAATTA
AGCAATGATAAGATTAATCTAACCCGTCCAAAGATCCCGTGATATGTTTATTTCCTGACC
ATTTTGCGAGATGGATGAAGCTATCGCCGGGGTCATAGGTATTGATGGGCCATCTAAGTG
AGTG
>comp640_c0_seq1 len=337 path=[315:0-336]
GAGGATGAAGTCTAGTTCGCTTCTGTTTTGGCACACAAATTTGTTTAGATAACTTAAGCA
AATATATGAAGGATGAGAGTCAAGAACAGTCATGCAATGTGATAAAGAACACAAAATGTA
GGAGTTCCAAATCATGTCCACCAAGGCCCAGGGCTAACCCACAAATGCATAATGTTTACC
ATTCCACTACTGTTTGTCTCAAAAATTACATAACACACTCCACACAGTTCTATATTTGAT
AAGTTTTCTTTATATTTTCTTTACATGTTACTGCCTACAAATAACTTGTTTTTCATCCTT
CGAAATATATGTTCCCATATTGCAAGTAAATCAATAT
>comp641_c0_seq1 len=347 path=[839:0-346]
TTGTATTGTTTCAATCCAGGCTGGAGGCTACTTGCTACAATAGAATCAACCTCAGTCAAC
CTCTTACGGATAGTTTGAAGATAAGCAGTGAAACACTTGACTTGGTTTTTTCAGAACTAA
AACTGATCAGATAAGTCCACAAGGAAGCAAAAGACACCAAGCATGAGATCTAACAGGCAA
ATAACCAGAAACTCTCACAAAGAAAAAGCTTTTATCACTAGATATAGGAAGCAAAACTTT
TATCATTAGGCACAATATTATAGTCAGCACACCGCTATGCTATTGAAGACTCTAAATTGG
CAATTAAATATCATACTAGCAACATTAACATAATAAAGAACGTGCTC
>comp643_c0_seq1 len=471 path=[339:0-301 65:302-470]
CCCTGACAAGATATGTTAGTGTATCCCCTTTCTAATCTCTCTCTCTCTCTAACATGGTGC
CAAGAGCCTATCAATTCTAATTTCACATAAACCCTAATCACCAAATTTCTGAATTGTCTG
GCTAAGTTTGCAAATTCTGTGTCATACACTTCACCCTTCTTCTGAGGTCCTTTTCAGCTT
CTGCCTTTTGCTGATGTGTGACTAAGTACCATGCTTGAGGAGATCTGCTGTGAACTAACG
AGTCACTGATTCATGATGGAGGGCAACCCAGTTCCAGTGAACAGCAACCACTGCCTGGGT
GCGGCAGCCAAAAAGAGCTGTGAATTAAGGAGGTGGAAGGCCACAGAGTGCTGCGTGCTA
CGAAGGTTCTCAGCTGTTTGCGGGCACAGGAAAGGTGCGATCTATCCTAGAAGCTTGCAG
TTTGGTCAGAATTCTGGTTTTGTGGCATGCAATTTGGCAGGTTCTTGATGT
>comp646_c0_seq1 len=330 path=[308:0-329]
GTAGTTATAAAGTGTTGAAATAATTCACGATTTCTTATTGTTTGAGCTAGGAGGGGCAGA
CATAGTGTTGGGGCTGGATTGGTTGGCTAGCCTGGGGAACATCACGGCCAATTTCCGAGA
GTTATCATTGAGGATCAAGAAGGAAGGCCGGATGCATACCATAAAAGGGGACCCTTCATT
GTGCAAGGCTGCAACTTCACTAAAGTCACTAGTAAAGTCATTTAGGAATGAGGATGAAGG
ATTTGTGGTGGATGTCAGAAGAATTCCAGCATAACAGACTCCAGGGCAGCAGGCACCGGT
TAGTGAAATTCCAGAACTGCTCCAAGTTTT
>comp646_c1_seq1 len=633 path=[615:0-632]
TTGAGGAGCTATTCCAACAACCCATAGGGCTGCCACCTTCAAGGAGATGTGACCATGCTA
TACTGCTGAAACTAGGAGCCAACATACCTAATATTTGTCCATACAGGTATCCTCACTACC
AAAAATCTGAGATTGAGAAATTTGTTAAAGAAATGCTGGAAACCGGGATGCTTAGTCCGA
GCACTAGTCCGTATGCTAGCCCTATGATCTTAGTGAAGAAGAAAGACGTGAGTTGGAGGT
TTTGTGTGGACTATCGAGCATTGAACAAGATAACAATCCCTGATAAATTCCCTATTCCAA
TTATAGATGAATTGGAAGGGGCTACAATATTTTCTAAATTGGATTTGAAATAGGGATACC
ATCAAATTTGCATGAGAGAAGAGGATATTGAGAAAACGACATTTAAGACTCATGAAGGAC
ATTATGAGTATGTGGTAATGCCATTTGGTCTCACTAATGCTCCTTCTACTTTCCAAGGGT
TGATGAATGAAGTGTTGAGACATTGCTTAAGAAAGTTTGCCTTGTTTCTTTTTTGATGAT
ATTTTGATATATAGTAAGGATGGGACCACTCATTTGAGCCATTTGAGGGAGGTTTTCCAG
CTCTTGTTAGTTAATAAGTTAGTGGTGAACAAG
>comp647_c0_seq1 len=450 path=[1087:0-449]
GTGCAAAAATTCGAAAGGATTGTGGCCATAAATCAAAGTCACCGTGCATGCCAACTCAAT
GTCGCCTGGTCACCAGATCGCCTTCGACGTGTAGATTGGGCCAAGCTCTCCTGCTGTGCA
TGCCAGACCAGGTCTAGGATCGCGATTTTGATGTTCGCTCAGACCAGTGCGTCCACCCTC
CGCGGCGTATCTTCTACGATCCATCACGTTAGCCGGAAAATCTTCGGAAGCGTCAGAGAG
TGAATTATCTGCCTTAGGCACCGAATTTACATGAATCAATTCTTGTTCAAATTTGCCATG
CGGATTGTGAATGTTGAAGGAAGAATTGAGATGTTTTCAGTTCATACTTGTTGGCGCTAA
TGGGATTTATGGTAGATCCGATGGGCGGTTGCCGGGGGTATTCAAGGAGAGGGAGAAGAG
GCAGGGTGAGAGAGGATTTCGGTAACAGAG
>comp647_c1_seq1 len=566 path=[544:0-565]
GTTTTTTTTTAAAATATTTTATAAAAAGTAAAGGGTAAATTACTCTAACCCTTCCTCAGA
TTTCTCTAAAAGACACTAAACCCCAAAGTTGCTCCAAAAATACACTTCATCACAGTTGAC
CGGTTGACCGTTAACTCTGTTAACAATTCTAATGGAAACTAGCTCCTAGTTTTGCTACTC
AGTGCGTATGATCGGACCTCTGCAATTACTCAAAGACATGTCCCCGTTTCTGGTAAAGAG
TACTGTAGATACCAACCTTCTTTGATGCCCATCGGTACCCCCAGCAATAATCGAGTTGGA
GAACCCGACGTAGACAGCAGATGACTTAACTTTCTTGCGGCCTTAGGTGCCTAGTTTATG
AGTCTTATTTCCTTGATTTTCTTTTGCAAAATAAAGTAGTAGGAGCTCTGACGACACCCA
AGAAATTCTGTTGAAGCTGCAACTTGGGTAATGGTTTCTAAAGGCCGGTGATACAAGCGA
TCGATGCCCATCTGTGTCATCAGATCTAACCGTGGTGATTCAAATGGTCTTTCCCCATCC
ATTAATAGAGGCACGTTTCGTGCAAA
>comp650_c0_seq1 len=337 path=[315:0-336]
AAAAGTTTTGTAATCAAAATTAAATCCATTCACAATTGGCTTCCAAAGTTACTGTTTAAA
TAATAAAACATTTATGGGGCTTAAGAGCATATGTTGACTGTGTGTGTATCAATTTAATGT
CAGAATTTATAATAACAAAATGGGGAGATGTTGTTTCATTAGTTAGAGCTTAAGTTAATC
TAAGCAAAATACATAGGTACAAATATATGAAATCAATGAGTTTCATTCATTGGGTAGGTT
TTTTATTTTATTTTTAAATTCAAATGGTAACATCATTTTGTCATAGAGGATTCACTTATT
TGGTTCTTTTATCAAGGATATACTAATGAGGTGCACA
>comp651_c0_seq2 len=485 path=[845:0-152 536:153-176 560:177-186 570:187-210 594:211-484]
TTTGCATCCAATGAAGGACAGATCTGCCATCAAGAGCAAAAGAATCAAATAAGCCAGTGA
AGAAGATAAAATCAACCCATGCTGCAATGTTTTGCATAAATGTAATTTGCCATTTGAGAA
TTCCACCACAGACAGGTTTGGAAGGTTTTGCTCCTCTTCCTCCTTTTCTTATTTCAGACA
TTACTTATTAGCATGCATGAACATTTGCCCCAAATAAGAATGACTCCACACTTGAACCCC
ACCCAACTTAACTGAAAGCTTGTGTGCATCATATGTGTATCTGACTGAAACTCAAATTTC
AAGCATCTTAGGAATTTTGTCTCCATCCAAAAGATGAGTTATGAATGAAAATTCTTGAAA
GGATGGCCAGCCATGACAATAGTTTTCAATATAAAATCAGGTGTCATGATAAAAAGAGAT
AAACAGGGCAGCAAAATGAGATAGTAAGTAATAATCTATACCCTCATTATGTTTCATGGT
TGGAG
>comp653_c0_seq1 len=320 path=[1:0-319]
AGAGGTTCAAATGGATTAAATTTGGATGTCAAGACTGAGGTTTGACTGCTCTGACAGCAT
GAAAATATGTCTTGGAACCAACCTATTGATTAATTTTCACAATTTCTAAGTTTCTTATGA
TTAACCAATTGATTGCCTTGTAATCTTTCATATGTAATTTGCCATGTCAACAGTTGATAT
TGTTTTAATTTAGTTTCAATCTCAAGCTGTATTAGGATTGAGCTATGCATGCTAAAGCCC
ATCTCTATGGTCAGACTGACATGGTACAATAATTTCTTTGATATACATGTGGAAATGAGT
TGGTGGATTCTACTAGAGAA
>comp653_c1_seq1 len=373 path=[595:0-372]
AATTTAATCCATTTGAACCTCTACAAGTTTATTACCTATCTTCTCAAAATTTTCAGTAGA
TTCTTATTGCAGCTTCTCTTGCAACAAGAAAGGAATAATTGGAGTCATTTATTTAAGGCT
AAATTATACCCAAAAAAAAAAACCCTTCAACTTAGGATCAAGTGCAATTTACCCCCTTGT
GCTTCCAATGGAAGCAATCAACTCCCTAAACTTGTGACATTATGTGAACCACACTTTCAA
TTACTATCCCATTTAAATTGTTGATGAAATTATGCATGTAACATAATGTCATGTTTAAAA
TAAAAAGGAAGGAAAATCTCTAAAAAAATCTCATTGTTTTCCTCTTTCTTCACAATTGCT
AAGATTAAAGAGG
>comp655_c0_seq1 len=394 path=[1:0-393]
GTTCTGTATTAAAGTTGATGTTTGATTTGAGTCACCATTTTTTTCCCCCAAAATTACTCT
TGGAATAAACACTCTTCACAACAGTATATCACAAAATAAAGCATGGTTAGTTTATTTGTG
AAGAGTGGTTTTATTGATATTTCTGCTACCCCAAGTTTTTAAACGAAACAACCACACCTT
ATAACAACATAATCACATCTTTGTTTGTGGTTATGCAAAACGGAGTTTTGAAAAAAAGTA
AATACAGAACCAAAAGTGGAATGTGGTTTATGAAATGACACTAAGCAATTCTTCAAAATA
AAACTAAAAACTAAAAAAGTGCCGGATCTTTCTGTCTTGTTTACTGATAAATGTTTTGTG
CATTTCTGGCAGTCTTTAACTCATCAATGGGATT
>comp657_c0_seq1 len=581 path=[383:0-580]
AACCCAGATTTAAATGTTTTCCTGAAATATTTCTCTTCTAGAAGAATATGTTTAATTTGA
GAGAAAAGAGAAAGAATATGAGGGAGGAGGATAAGATATCCTCTTAGATAGAGGAGCTAA
AAGAAAACAGTGAGCTTGAGAGGCTTAATATTTGCAATGATATATTCAAAGTAGACCTCT
CAAGTGTTTATATAGTTGTAAACCAAAATCTGATGTTACAAGTCAAAAGACGAACAATCA
GATGAAATTATTTGTCGCTACAACAAGTCTACTCTTTGTTATTTCTGACAATAAAGATCT
TACTATGTTGCACGAAGTTTCCAAAGAAACAGGTTCATCTGCCAAAACCATCTAGGCTTT
TGACTGAGGACTTGTACTATTAAGGTTTCAGAAAATGCCAATGATCATCCTATGGAAATA
TTGTGCATGGCCAAAAAAAAAGCAAATATTTTAATATGCCAAAAGTCGGTATTTTTATTG
AATAAACTACTACATACTTACAAAAGAAAACAAACTAAATTTCCTAGCACCAACTATACA
AACTTAAGAGCATCCACTTCATTAAAAATTAAAAGGGCATA
>comp659_c0_seq1 len=316 path=[1:0-315]
AGTTGCGTCTGCCAGATTCCCAGTGTCAGGTCTTCATTCCTAACAGTAACATGTTTCGTG
CGAGAACTACCTAATTGGCTAGGCTATGTAGTTACTATTGGCTAGGTTACTATTAGCTAG
GTTATGTAGTTACAGTATTTTTTTAGTTTTTCATAGTAGAAATTGGCTCCGGCTGATTGG
CGAGCTAGAGAACAACGTGTGGTGAGGGGCTGGAGAAAATATGTAGCTCTAGCTTACTAG
TTTTCGATAAACCTAAGGAACTATTGCTGAGGGTACAACAATTATCTATCTAATGAAAAC
TTATTCTCATTATAGA
>comp661_c0_seq1 len=403 path=[381:0-402]
AACCAGATCAGGGAAGAGAGAATATTGGAAGTACCTGCTTCTAACCTAAGCCTAGAACTT
ATAACCTAGGCACAAATCCTCTACAGCACTCAAACTTCAATGCACCTATCTATCACATAG
TAATAATCTTGTCATCAATCTGTAAATATTTATAGCTATTTAGCTAGAATAGTTATAGTT
AGTAAAATAATATCAAAGCACACAAAACTTCCTGCCAATCAGGCTTCTAACAACCTGAAA
AAGGTAACAAGCCTCCTAAATTTCAAGTATCTTTGAATTAAGTAAATTTGCAATATTGTA
TGATGAGATATAGATTTCAATGACACATCATCCTGTGTAAACCTTTTTTTAAATATTTTA
TATAACAAGTGTAAACTTACCAATCCACCTTCATCATCATCAA
>comp663_c0_seq1 len=732 path=[1211:0-189 54:190-731]
GCCAGATGTTATGCCCTCAAACCCTGAAATAACAAACAAGATTATATGATAGAATAAACA
TCATAACCTCTTTTTTGCCAGACATCACAAAAAACAGAATGTTTTACAAACCAAATCCTC
TAAAATTACAGAAAAAGATTTTAAATGAGAAAACATCAATAACTACTTTGATAATGGGCA
AACTCATTGTAACATACAACTCAGCCGTTCATTTCTTCAAAATAAACCTGTAAGAGCCTG
ACCCTTCTCTTTTTCTTATCCAAATGGGAGAGAGACCCCTTTTGGCTTCACAACGGCCAC
AACAAGAGAATAGAGAAAGAAAAGGAATACAATCACCACTCTGCTCACTTGTTGGCAACA
AAGAAATAAGGACATGAAGCCCACTTAGCCTAGTAGGATTATTGCTCAGTTAAAATTAGT
TCCTTGAAATTTCTACTCAATAACATAAAATAAAAGAAGATTAAAAAATTAAACTACTCT
ACAATCCTGAAATCTCTCAGCAACCAAAGTATGTTAATTCAACGGCAAGATGACCCCAAA
AAAGTTAAATAAATAAATAAAAGAATACCCTCATAAGATTGGATTCCAAACGCAAGTTCC
ATCATGGAGATCCTCGTCCCAATTCAATTCAAGCCTTTACCTTTTACCTTTTTTTCTGTT
ACCCACTAACCCAAGAATTAACAGAAAACCCAGCAAGCAAAAAGAACCTAGCATCAGATG
AATCAGTTTTTT
>comp666_c0_seq1 len=364 path=[1:0-363]
AGGCCTTACGTAGTGCATTTTTGGCAGCAGTGGTCGTGAGTATAGGTAAAGCATGTTCGC
AAAAGAAGTGCATGAAAACCGTATAGCCAAGTGCAGTTCACCCATCTTCTTAACCCCAGT
TGGGTGAAGAACCAGCAATGGATATGAGTGAGTGTAAATCCTGCCTGTTTCAAGAGTAGA
GATACGAATTCTGACCTTGCCAATTTTCAAGTCTTTGGAACCATTTGAACCCTTTTCCCC
GATCAGGCTGTTGTCAAAGACACCTACTGTAAGGACTGTTGCCTGATCAAAAACCTCCCA
AGTGTATTGCTCATTGTATTTTGGAGACAGATTATCAACAATAGTCCGTGTTCTGACCCA
TTTA
>comp668_c0_seq1 len=747 path=[1:0-746]
GTGTTAGAGATATAAAAACCATTCATGGACTTTCATCTAATAGTTTAAGTTTTGGGAGAG
TTGATCCTGGACAACCTCCACTCTCTGTAGAGATTTCTGCAATATTACTACCTGAACCCA
GATCCTTCCCTCCAATAAGTTAACACTAGGCAACCTGAAGCGCTAATATGATGTTGAAGT
GAGATAGTAAAGATGGCAAATCATAGAGCCCTATCATTATTAGTTCATCATATATGAACC
TGGAACACTAATTGCTTGGATACACTAGAGCAGCTCTTTGCCTTTGTACAGGGACTTCAA
ATGTCTCCTAATTTCATGAAAATTTAGATAAACATGTTGATGTGTTACTGAAAGAACATT
ACTTAATTGATAAGGCCACAGCTTAGATAACCAAGTCAACATAGAATGGCAAAAAGATGG
GGTTAACAAGTGGTATACTTCTAGCACAAACAAACTGATTTAGGCCCAGTTGCATCAATA
TCAGTCAAATCCTCACATGGAACTGGAAATTAGAGGGGGAGAAGAAAACAAAAGGAGGGA
GAAATGGGTTTTTTTTTTCATCTAGTATTTTTCTTCATTTAGTTTCCCGTCTTGTGCTTT
CTCTTATATAATGGAGCATCAAATCCTTCTGGGCATGAGGTAGAGATGGAAGAGCTTCAA
ATACTCAATAATCCTGAATTTGGCTCCGGTCCATTGAAATCAAGAGAGGTGAGAGAGATC
ATGATGAAACTTTGGAATTAATGTCAT
>comp669_c0_seq1 len=371 path=[1:0-250 702:251-370]
GTGGCCGGAAATACAGCATTACGGGTGAGATGATTTTTTTTATCCATATTCCTGCACTTG
TGGTCATTTTTGCTGATTACATTTCTCTTTGATCCTAGGTTAATTTCAATTTTATTTTGG
CTGTCAACTCATCCACTAACTTATGGTGTTTGGGCATAATTCAGTATTTCTCATCGTGTC
TATATTTATGTTCAAATATTTCCTGGAACTTTCTCACATGTCCTGGCTTTTCTGGTGCTT
TTGGCTTTGAAACACTTCAAATCATGTACTTATAGTTATTGGTTATTAGTATTGGCTCAT
TTTGAGAAAGTCTATGGTTGCATTGATAATAATACCTGGTTATTGCAGTTACGGCAAGCC
AAAACAGAGAT
>comp670_c0_seq1 len=780 path=[1242:0-779]
GGTTGGCAAACCTTTTCTCATGACGACGAACCCGTCACGGATCAAGGAAGCTTCAATTGC
TCGTTACCTGGTGAGCAGATGCTAAACAGGCTCATAAAATTTGAAGAAAATTGCAAGTTC
AAGGAGTACCGGTCTCCTAGGGTGCCTTGTGATGAAGGCATGGGTGCCTTTGTGAGGGAC
CTCAAAGAGGAGTTTAGGGCCTTAGAGCATGTGTATGTGTGGCATGCATTTTGTGGGTAC
TGGGGTGGGATTAGGCCCAACGTGCTAGGGATGCCTGAGTCGAAAGTCGTTGCTCCAAAG
CTGTCGCAAGGGGCACAGATGACGATGACTGATCTGGCGGTGGTGAAGATACTGGAGAAT
GGGGTGGGATTGGTAGCACCAGAAGAGGCGCACAAGTTGTACGAGGGACTTCATTCTCAC
CTTGAATCGGTGGGAATTGATGGTGTCAAGATTGATGTCATACATGTTCTAGAGATGCTA
TCGGAGGAAAATGGTGGTCGTGTTGAACTCGCCAAAGCATATTACAAAGCACTCACTGCT
TCCGTGAGGAAACATTTCAAAGGCAATGGCGTCATTTCTAGCATGCAGCAGTGCAACGAT
TTCATGTTCCTTGGTACAGAAACCATATCACTTGGACGAGTTGGTGATGATTTTTGGTGC
ACGGACCCGGCTGGAGATCCAAACGGTATGTATTGGCTGCAAGGGTGTCACATGGTGCAC
TGTGCCTACAACAGCTTGTGGATGGGAAATTTTATTCACCCAGATTGGGACATGTTCCAG
>comp671_c0_seq1 len=419 path=[285:0-303 51:304-418]
CTTATCCCGTCGACTTGGTACGAATATGGAAAGTGACTGGAGCGTGGTGTTTGCTACTGC
AGGGGCTGTTCTTTGGCAGCATAGAAACAATTTGGTTTTTGAGAATAATTCCCTTTCCCA
AACAACCCTACTCATGCAAGTTCATAGCAGGGTGTAGGATTGGAGGAAAGCTTGGGATCT
AGATGCTGCTACAACCCTTGTCAATAGAGGCTCTTATGTTTCCCATTTACATTGGCAAGA
CCCTCCCCTTGGATGGACCAAACTTAATCGTGATGGGTCCTTGATCTAGCATGACTTCTT
GTGGAGGTGTGCGATCCAGTTCTTGGTCGGAGGATGTGATCCATCCCATCCGTGTGCTTC
CCTTGTGCAGGCTATTCTCTCTATGGTAGAGCAAGGCTGGGTTATTAAATGGCTTCATG
>comp674_c0_seq2 len=403 path=[354:0-38 1094:39-402]
GAAAATTCACTATGATCAATGAAGTTTACAAGGAGTAGCCACTGAAATATGTATAGGCTT
GGATCCTTCGCGTCCAGCGCTAATCTCCATGAAAAATCACTTTTGGGTCTCACTGCGTGC
TTTTTGGATAGAGTCACATGTTGGCCAAGCCCAAAATTAAGTACTAGCCACTTTATAACA
CCTGAAAACATTATATGCAAACTATCACCCAAGCCCAAAGAAACCAGGGTCTATATAACA
AAACTGATAGTAACATGATGCTGATCAGATGCTTCTAATAAAAGAATCACAGACCTTTTC
TACATTGAAATCTCCTGACACTGTGTTTGCCCTTTTGGTGTTCAAAATTGGTTCTAGATG
TAACCCTTTTCCTCGAATCAGGTCAATGGAAGGAAAAAGATTA
>comp675_c0_seq1 len=641 path=[223:0-546 41:547-640]
CAACAATTGGAAGCAAAAGCAAATATTATACTAAAACTATTAAATGTAATTAGGAAAGTT
TAATGGAAAATGCAAATGTGTATGATTAACAGTTGGAGTAGAGGGAATTTTGCTTGCTTT
TTTCGCCACCTACTTATTCTATCATTCTTTGTCTTTCCATGAGGTTGTGTCTGTGTGAAG
TTACCCAATGCAATATCATGTCTCGTGATTTTGTGTGTGAAATTGGTTAGAGATTGAAAA
CATTGTAGTCTTAACCAAGAGCAGAGTATGATTGTGAAAATCATTCTTAGAGTATCATTG
TTACTCTGGATAGTTATGTTATAGACTCTGTTAGTTGAGACCATGGTTTCTGAATTTGTT
AGTTATTGTCTAGCATGCACGATTCAACCAATGCATGCAGTACTTATTGTTACTTCTAAA
TGCTCATCTACATTATTTGAATGATTGTTATTGTGTTTCACACTTTCAGTGGGTCGGTGC
TTGGCCTTGTGTATTACATTTGAGAATATTTTCTCTGATGTTGGCACATACCAGCATTAT
AGTGGCCTAGATTGTTTATCTATCAGAATTTACCTAGTAAGCCATTTTCATATAAATCTG
ACTTTGATATTATGACCACAGAATTGCACAGATATGGAGGT
>comp676_c0_seq1 len=1208 path=[1736:0-712 551:713-1207]
AATAAAGGTCTAAATCGAAGAATTCTCTGAAGGGGCAGGTTATCTGCAGAATTGTGGACT
CTCAGCATCATCTGCGCCAATATCACGAATATGCCACCCACCATTTTCTTTTCCCAAAAG
CCAGCGACAACCGCAAGAATGAGTTCAAGGCATCGTCCACTACACGCCTGCGGAGTCTCC
ATCTTAGCAATTGCTGACATTGCCTTCGGAAAAACCCAAGATATCAATGGACCATTAGGT
TCAACCTTGAGAAGGATGGCAAAGTTAGCCAAATTTGCCACTCCCCTCATCTACGCCATG
CAATATCAATGGCTAGCCATCCTCTCCTTCATAGATGATCACATTCTAGGAGTTGAGAAA
ACGATCGAGAAATTCTTTCCGCCTTCAACGTACGTGTTCGACAAAATTGATGAACTTGTT
CCAATGATAGTGTCCCTGCCAGAAAAATTTGATGGTGCAGTGAACAAGTTTCCTATAATA
ATACACCAAGTCCCATTCATAGAATGGGCACTGGCCCATGTCATATCGCGGTTGAATAGT
TTGGTTTCCACGTTAAACCATTGGGGACTGGAAGATTCAAGGGTAAACGAGAAAACGATT
GGTGTTGATAGGAATTGTAATGAGCAGCTGGAATCGGCATCTAGAGGGTACCTTCCCATG
GATTCCTCAAATGATATTAACAGTGAGAATATTGAAAGCTTTCCTCCCATATTAGAGGCT
TCTGAAGCTGAAAATAAAGGGGTTGTTGACATGGCAGTGTCGAGTCACATGAAAGGGTCA
TACAAGGAAGCATTAGAGAGAGGGACAGATCAAGAGAACCCACAGAAGATAGAGAAAGAG
TGGCAGAGTGAGAAGGAGATTGATGGAGGTGAATGTGAAGTAAATGAAGGAGAGAAGAAT
GATAGAAATGAAGAGAATGAAAGTATTGTGAAATGCCAAGTTGGAAGGAGCGAAAGCATC
AAGGAAGATGATCCGCTTCTGGCATTGTTTGAGTCTGCATGGCTCATGAAACCTGGCCGT
TTCTGGAACAAGAGAGAATGCAACTAGAATATCTGTGACTCCGTGCTGTGACCTTCGATT
CCATGGTTACTCACAAAGTCACAACTCACAAGTGAGTGCCTTTTTATTGTTGTTTTCTCT
TTTGCAGCTTGTTCTTCAATTATTACCTGAAATCTTGAAAGGAGCTTGTCAAGTCCGTTT
CATTTATG
>comp678_c0_seq1 len=692 path=[670:0-691]
GACAAAAGAAACTCATCACTCCTCAACTTTCCTTTGTCGTCATTGACTGTGAATTAATAT
ACCACGCTGGGTGTTCTAAGATTTGGAATTTTGAAGGAGGACTACAGTACAAAGAGAATC
CAAATTGAGGCAGGGAGAGTGATGAAGATGGATTAACAGTGAGTGGGAGGACTCTCAAAA
GAAAGTGTGAATTCCAAGCATGAAATGAGTATCGCTCAACTTTGGCTTTTCCGAGCACGC
AATTCTCCCCTTTACAAGTTTTCCGCTAGAAGAGTATCCACAGACCTCACCTCTTAATTA
CATCAATATAAGGGAATGCAAACTTCAAGAAACACAGAGACATACACGTTCAATTTTATT
GTTTGGTCCATGATATGGGGATGAAGACATCAAAACAAACCAGCTAACAAGGCGCAGAAG
CCTTAGACAAAGCCTGAAGACTAATCAGGAATGCACATGTGCTTTCAAACTTGACTCTTT
GAAAAGTGCAGCCATATGATCATGAAGATACTTGAGAGAAAATGCTATTCGTTGTGATCA
TCAAGCCTCTTGGGGTCGTTTTGGATGACGGTAGCAGACATGAGTGGCGATTCCCAGCCA
ACACCAAAGCCATAAGCTGGCGATGCAGATGCAGTGTTGATTGAAATCAAAGGATCATGA
TCAGAATGGGGTGCAATACTATGCCCATTGGG
>comp678_c1_seq1 len=605 path=[1921:0-604]
GATCAAGAACTACTGGAACACCCATCTCAGCAAGAAGCTCATCATCCAAGGGATTGATCC
CAGAACCCACAAGCCTCTCAACCCACCTATTCCCTCTTCGTCCACTACTCCGCCTTCTAA
TTATAAGCCTGTTTCATCCAAACCTAATAATAATAATAATCCTCTTCCTCCAATAATCAC
CAATCACCCAACCCCTTCTACTCATCATCCTATTCGTGACGCCATTCCTAATCCTGATCA
TCTCATTATTGTCAACCAAGAAAATGCCTACTTGGATCCCAAGAGCACCACGGATGATCA
TTTGGATCAATATCAAGAAGCTCAAGTAGCTGGGAATATCGTAACTGATAATGGCTATCA
TGCTGCCTACGACAATCTTAATCCAACAGCTGCCACCGATTCTGATTTTTCTGCAATGGA
TTTAATTAGAAGCAACAATCTACTTACCACCAACAATGAGGATGACGATGATATAAATTA
TTGTTCTGATGATGTCTTCTCTTCCTTCCTCAATTCTTTGATCAACGAGGATGCTTTTGC
AACCCAGCAACACCTGCAACCAGAGCCTCCCAATGGGCATAGTATTGCACCACATTCTGA
TCATG
>comp679_c0_seq1 len=808 path=[1:0-807]
GGAGAGCGGCTACATCCCATATTCTCTTCCATTTCGTCTGTAGTAACTGTAGGAATTTTC
TGTCAACCGCCGTCCCGTCTCCCAGTTCAAGATGCCTACGATAAACTTTGGAGCTGGACC
GGCCAAAATGCCTGAAGAAGTGATGAGGCAAGCTCAGAGGGAGTTCATTTTCTACGGTAA
CACAGGCCTCAGTGTCATCGAAATGAGCCACAGATCTTCGCACTACGAGAATATCAACCA
AAACGCTCAGGACGTTCTAAGACGGATTCTAAAAGTTCCGGACAATTACAAAATTCTTTT
CCTTCAAGGAGGAGGTACAGGACTCTTTGCGGCAGTAGCAATGAACCTCATGGGTCGAAC
TGGTTCCGCCGATTACATTGTCACAGGATCATGGTCTGCTAAAGCTGCCAAAGAAGCCGC
CAAATACGGCAAAGTTAACCTAGTCCTTCCCAAGACAAGCAAATACACTGGTATACCGAG
TCAGGAAACGTGGAATTTGGATCCGAATGCCTCCTACGTGTATTACTGCTCGAATGAAAC
CGTCCACGGAGTCGAATTCGATTACATTCCAGAAACTAACGGAGTTCCGCTTGTAGCGGA
CATGTCGTCCAATTTCCTATCAAGAGGTTTCGATGTCAGCAAATTCGGTGTGATATTCGC
TGGAGCGCAGAAGAATGTTGGGCCTTCGGGAGTCACTCTGGTGATAGTTCGAGAAGACCT
TCTAGGAGAGCCCATGAAAATTTGCCCTATTGTCATGGATTTCACCATAATGGCCCAAGA
TAATTCATTGCACAACACTCCTCCAACG
>comp680_c0_seq1 len=499 path=[477:0-498]
TTTTTAAATTATTTATTATTATTTCTATAGTATATTTCCAATTTAAATATGCAAAGCATT
GAAGCAAGCAAGCGGCAGAACAAGCGTACTGTGCCTGTGACTCTCATTTCTAGGAGCAGT
GTGTTTGCCTTGGCAAATGGCAATACGCGTTAGAATTGGCGCTGGCGGCACTATTTCGAA
AGTTGTCCACTCAGCAGTGCTTACATTATGGTAATGGGTTAGCACTTAGCAATGGATTTA
AACAAAATCCATTCAGCTCTACGCTGTTGTGGGCGCTATCAACTTCAAGCTATCAAACAA
GCCAAATCACTACATTCTTACATAATAAAACTTGGCCTTTTTAATCATGTTTTCCTCATA
AATAACATGATCTCAGTCTATTCCAAGTGCTCCCATTTCGATGACGCACGAAGCCTATTC
GACGAAATGCCTCACAGAAACATCATTTCGTGGACAACCATGGTCTCTGCATTTACCAAC
TCTGGGAGGCCTCACGAGG
>comp680_c1_seq1 len=560 path=[1490:0-559]
AGGCCTCACGAGGCTCTTAGACTGTACAATCAGATGCTGGAATCCAAAACAGAGGAACCC
AATGAGTTCTTGTACTCTGCGGTTCTAAAGTCGTGTGGTCTCGTGGGAGATGTTGAATTG
GGCAAGTTGATTCACCGACATATATCTCAAGTTCAGTTAGAGTCTGACACTGTTCTGATG
AATGCACTCTTGGACATGTATGTCAAATGTGGGAACTTGAGGGATGCCCAGCGAGTTTTT
GATGGAATCCAGTGTAAAAATTCGACTTCATGGAACACCCTTATTCTGGGACATACTAAA
CAAGGTTTGATGTGTGATGCGCTGAATTTGTTCAATCAAATGCCGGAACCTGATCTTGTA
TCTTGGAACAGTGTCATTGCTGGTCTTGCATTTAATGGTAGTCCCCATGCACTGCAATTT
ATTTCTATGATGCACGTGAAAGGCCTTAAACTAGATGCATTCACATTTCCCTGTGCTCTC
AAAACCTGCAGTCTTCTTGGTGAGTTGACCATGGGGAGACAAATTCATTGTTATATTATC
AAGTCAGGGTTTGAGTCTAG
>comp681_c0_seq1 len=575 path=[553:0-574]
GCCCTTAGAAAATGTAACTTGTTCTTTGTTTTGAAGATTTTTAACACTTTGTTTTTACAA
TGACACCAAAGATTGTAGGAGGTTCTAACAAACTACCAAAGCCACTCTTAAGGACGAGTA
GATTTGCAAAAGTTGCTCAGCTTTTTACTAGTATCTATCCTCAGAAAAGAGTGATAAGAT
TTAAAAGTTGACAAGCTCCTTCACTATTTATGTATTTTTTGTTGTAGTGAGTTGTGAGGT
TTAATTCAACCAAAACCGAAGTAGCTTTTAATGTAGTAACTAGCTTGAATTAACAACTAA
CATGGTTGGCCCTAAATGGTGCTGTGTTGACAAGTCCAAGTGTCCAACATTGTTTATCAT
TGTGAGCCACTTCCTCTCATGTCTTCATCTATTTTGTTGTGTTTTGAAGTTTTACATGTT
TTAGACCAACATCAATGGCCTGTGCTTGCTATATTATATAAATCAAGAAATCAGCTAAAT
AGTAAACACTTTAATGCCTATAATTTCGGGATATGGAGGTCCCAGCAGTAAGACAACATA
ACCAAAAATTCTCGGCCAGATATTATTGATATTGT
>comp682_c0_seq1 len=483 path=[1:0-482]
TGACATTTGGGTACATACATAAGGTATACATTGTTTCATATGAGTAGCTTGTGGAATTAC
AAATTTAGGTTTGCGTAGTTGTTGCTGCTGCTGCTGCATGTCACAGTTTCCACATCACTC
TTAGATCAACTTAAAATAAGTTGTAGCTTGTAAAAAGTTATTTTCTGGTTTAATGGTTGT
TATCGATCATGACTAAAGAGTGTAGTGGTGCCTGTAGCACCACTCATTTGGGATATATTT
ATTGTTCATATAAGAAGTAAAATATGTTGTGCTGGGGCATTCATATATAAGTATACTAGC
AATGAACCAGGTCCAAGCCAGATCGTTGAAGGTCCAAGGTTATTTCCTTCTTTATCACTC
ATAGGTATTTATATTTTATTAGGCATAGGTAAGAAATTGAAGATTAATTGTGTTTACTTT
ACCTGATTGTTGGATTTTTGAACTGTACAAACTGTTCGCAGTCTGAGGCTTGGTTAGCAG
CTG
>comp684_c0_seq1 len=328 path=[662:0-327]
ATCTTGTACAGATAGTGAGGGCTTAGTTACTTTTCTGAGTGAACTAATGATAGGAAGGCT
GCCTGTACAGTACCTAACAATTTATAAAACAGATAGGGGTAACAAGTTTCTTAGACCAGT
GTCAGAGGAGGAGATCTATGCTGTGTTACTTTTACAATTCAATTAATTACTTCTAAAATG
CTCTAGATGAAGGCTGGTTTAAGAAACAACAAAGATCTCCATGTGAAATGCAACATCAAT
CTGGTCTCAAATATATCAAACAAAGGGGATCCCATCTGATTGATCTATGATTCCCGAAAG
CAATCAAGAATAATTATAATCCCAACCA
>comp688_c0_seq1 len=710 path=[949:0-220 9:221-709]
TTTTCAGCCAACTCACGAATCTTACACATTGCCATCAACAGTGATTAGACTTCAAACTAC
AACCAGCTAAATTATTCATAGAGAATCACAGATTTAATGTACAAAAAATGCATGTATATT
AAAGGAGCTAAAAACATTTCTGAAAGGAAACGCAAATATAGCAATTGATGCTTAAATCAG
TAGCACTTTATTTTGTTATTAACATATAGGTGAGTTAAGAAATTACAAGCATAAGTCAGT
TAAGAGGAACATAGAAGTCATTCATAAACTCTGCAGACAAACCAATATTACAATCAACTT
ATGATGTTCTGTTAAATTTTAACTAGCATTCAACTCCAGTGGCTACATGATCTAAGTTAC
TCAAGCTCCCCTCGCCTACCACCCTTACCTAAAGCAAGATTTTAGACATAGGTGCAAAGT
GCAAACACATCTATATAAAGCAATATATGTCTGATATTGTGCTCTTATATCAAATCTTGC
TTAACTTGTAGCTCAGTAACTTCAGAAGCTAATATCGCATAAATGAACCAAACAAATCTT
GGTGTTGCAAGCAGATAGATAGCAGATGAATTTTTGGTCAGTGTGATCTCATCTTCTAAG
GTACTGATTTCATTTCTCCATAGATGAGAACCTATTATTATAGAACTTATAACAAAGTAG
CATTCTTACAAGGAGGAAAAACAAGATACCTTCCAAGGCCAAAGTGTAGT
>comp692_c0_seq1 len=347 path=[325:0-346]
ATGAATATTTATATCTCTTAGTAATGTTAAATTCATCATCGACTTCAATTTGAGTTGCAA
CTTTTGTTGAGTGATTAGTTTGCTGGATATGTGGCTGGGGGGTCTAGAATAACTGCAATA
GACATTCCTGGTATTTTCAAGTTAGCTCTTCACTGCATTGGATTTATTAGGCCTTTAAAA
ATATTTTCACAGCATGCATCTTACCACTTAACTTGGCAGTACTGCTAGAGCAATTAGTTT
CCTGCAAATATATCTATCCGAATTGGATTTATCATGTCCACCTTTCTTTGGAGCAATTGA
AAATTTCATTTTGTGCATTTGCAGGGCCTCTTTGGGTTGGTTTGCAT
>comp692_c1_seq1 len=739 path=[1365:0-738]
GGGGGGGGGGGGGGAGATAAGGCTTGGCAGTTGTTGTTGTTCAGTACAAAAGAGAGAAGA
AAAGAAAAGAAGGAATACAAAAAGATATCCACTGTTTATTTTGATCATCTCAGTATGATC
CTGAAATTTTTTTTGACAGGGCACAGCATTCAGCTTGAATTAACAATAAATTAAAGCACA
CGTAAGTTTCAACCATTATCTATTGGTCAGATTTAAAAGATAAGAGGAGTGAAAATTTAA
TGATGTTTAAGTCGTGCAGAACATAATGAGAACATGCCAGTATTTGGCATAAAAAATTCA
TGTGGAAGGTCCAGAGACTGAGTTGGTCTATGTGACTTCACCCATTTCCAACCCATCGCA
GCTAAGTCCTAAGAAGCATATTGGCATGCATACAAATTTTGACCATCTAAATGAAATTGG
CCTAAGCTGTGCAGTTTCCAGTAAGACCTTTCAAGCCACCACAGTAAAGGAAATAAAACC
TTGCAAGAAAGAGAGAAAATGAACAGGGAATATAGTTATAATCTTTCATGAATTATGGTT
AAGTGCAAGCAGCATGCATGCTTCAGGTAGAAGAAGATAAGGCACAAATTACTCAATTAA
TAATAGGGAATAAAGGGATAGTTTCAGCACAACTCTCTGCACAAGTAAAGAAAAAGAACA
ATTTAGGAGAAATGCACCAAGAATGCCAAAAATAAACTGTAAGAGACACTCGTGTTCACC
GATAAATCCGATCTTCAAG
>comp693_c0_seq1 len=404 path=[1:0-403]
CGCGAGAAGGAACAAATGCACCGACTCAGAGACCGACTCTGCCTCTTCGTTATTTACAAG
ACAGAAGCACACAAATACATTAACGTCATAGAAGAAGGCCACTCCCGTCATTTCAACACT
GCAACTACTACTACCCAGAGGGAAACTTTTTTATCTTTTCAAAAACCCAATCTAAAATGA
AAGCCAAAGATATAGAGAAGGACAACAGAATTCAAAATACAGATAAGAAACCCACATAAG
ATGCATAAATTTCCATTTTCCAGTGATTTTTCTAGATATCAATCTTTCAAGGTTATCCCA
GTAGATTAAGACGCCGTAAATGGCCACCCATGAGAAGGAAAAGGACAAAAGACTCAAACT
TTGCAATGCCCATCACAAAAAATCAATATTCACAGAGAAGAAAG
>comp697_c0_seq1 len=392 path=[370:0-391]
ACTCTAAAACCCATAAATGTTATCTGATGCTTTCAATTAAACACATGCATGTTTATGCCT
CATATGCATAGTACCATTGTCATGAATCAACAACAATAAAATTGACAAAAGAAGGACCCT
TGAAGAAAAGCAGATGAAGTTGTCAATGAAGCATGATTTCATTATTATTATAAATCCTAT
AAATGCAATCTTTCTACCTTGTACATTTCCTTCATTGATTTATTTTTCTCTTCTTGATAC
ATGTGTTTCAATTTTATACTATCTCCTCACTCTTTAGGAAATGATTCAGTAGATGAATGC
AAGATATTGTAGAATCATGCAAGGAAAAGAAGGTTCTGTTAATGTAGGTCTTGTGCTAAT
TACTTCCCACCATAAGCATATAAAGGAGGTTA
>comp698_c0_seq1 len=687 path=[1:0-686]
AAACTTTGTTTCTAATTATGTGTCTCTTCATTACATAAGACAGGTTGGTATTGGATGGCT
AGAAATAGTATTCTTAGATTACGTGAAGCCGTCAATGAGATACATACTTTTTATGGGACA
TATATACTACATTGAGAAAGGGTATTTTTGTCTTTGTGCAACCATGAAGTTGATATGGCA
TAAGTTTCTGAATATTGAAAATCTAGATCATCAATGAATAAGGTATTTAGATTATCAACG
GAAGGGCCAATATTTTGAGGCACAATGCTTCCACACCTTCACTATGGTTGCTCTTAGGTG
CCCAACTGAGCAGTAAATGCTGTTGTCTGGTGTGAATGTTTCCGTGTACACAATTATTTC
ATTGTTTTTAATGGAAAACATGTTTCTATTATACTTTATGCCATAATAAAAAATTAAGCT
GTGGAGAAAATAGCTTAACTCAGCATGATACCTTGCTGTTTTTTCTTTCAATGCTGTTAT
GTAAAACCACCACACTAATCTGAGGGCTGCATCAAATTTCTCTTCTGTTTCACTACCAGT
TCTTCCATCCATTCCATTTTCTATACAAATAGTGCGGCAATGATATTAACAACTCAGAGC
TTCATGACAGCGTGATAGGGATTGTTCATTGAAGGGAAAGGAATGCTGGCACCATCAGTG
CCAAACGCATGGATCGGCATGTTTGGG
>comp698_c1_seq1 len=394 path=[1329:0-393]
AGCACTTCAGTGACTTCACTTGAATTCATTTTTGGTAGAGAACTATTGTCATTAACAAGC
ACTACTAAATTATTTTCAGTGTTAAAATTTTTCATCCTTAGTACTGATTTCAAAGGTCCC
TTGGTATGTACAACTTGAGCTCAAAGATTATCTTCAATCAGTTTATTCAAGTAAAGGCAA
ATTACTTCTACAAGCTGATCCTCTTAAAAGCCTAAACTTTGGCTTGGCTAGGGGAAGACT
AAAGAGAAAAAGTGGAAAAAGGAGAATCAAAATCACTGACATATTTCAGAGTGTTTTAAG
ATCAAAAGGAATTGGAAGGAGCGAAGCAAATGAGTGGAAAATAACTAGAAAGGGAAGATC
ATAATCTCAATTATCCCAAACATGCCGATCCATG
>comp700_c0_seq1 len=339 path=[767:0-338]
GAAACAAACACAGCATACATAGTTACGTTCATGCAGCAGATACTTGTAAACGTCCCTTCA
GCATATTAGAAGCTAGCCAAGCTAGCCTTTGACATTCCTTCGCAACTTTTCTATCCTGAC
CCGGATCATATTATAATTAGGAAAAGCAACAAAGGTGAGTTTAGGGTGGGAATCACGATT
CCTGTTTCTGCCCCTTACATCTCCGTGGGAATAGTATGTATTCCTCCTCCCCGCCTCTGT
TTTGATTCTCCATCTCTGTATGGGCCTTCTATATTAATGGGGCGGGGTTTTTCCATTGGC
AATGGAGATTCCTTGATTTGTTTATCCCACCAAATACCT
>comp701_c0_seq1 len=672 path=[1:0-671]
TTTTTTCATAACACCATGATGTACTAATGGCATTACACAAGATAAGAATAACTGAGAATA
CTCCCACATTGCATTTTTCTTAGGGTGGAGCAAAGTTTATCGTTTGCGCTCTATGCTCAG
ATTCAAAACTGTTATATTAATTATCTCTTCGGAATTTTCGAATTTGACCTCTACACAAAT
TTTCAAAAGAGAAAACACAACCCAACCGAATAGAATCCTTCTGCAGCAACAATCCAACCA
ACTGCAGGGCAAAACATATTGATCGCCCATGCACACATAGGAACTCATATTAAAGTCACC
AAAGTAATCACCCCTCATCATAGGATTTAACACTGAACACCACCAACCATCCCAAGAACT
TCGACGCAACCATCGACGACCAGAAAAACCAGAGAGAATCCATCACTGATGAATTACTAA
TAACCACTTCAACATCTCGAAGAACCATATCTTATCCCAAAGAAAAAGTGTCATAAAACG
CGATAACAAAACCGTAACACAGAACAAACCATGCCCACCCAGAATCAAATTCAGCATTAA
AAGTTCAAACAGTAGCATAATCGATCAAAAAAGAAAAAAAGAAAAACCAGAGAAAGAGAG
AAGTAGCGGAGTGGGGAAGAGAGGCTGAGTGAGGCTGAGTGCTCTTGCCGAATTTCCTTG
CTAGTGTACGTG
>comp701_c1_seq1 len=489 path=[1765:0-488]
GTAGAGGATTGCAACTTCTGGACTTATGAACTGTCAACTCCATATAATCTGATTTACTTG
TGCAAAAATTTACCAAAAACCTGCTTCAATGTATACATTATGTTTTCCATAGGCAAGAAC
TTGTTAAGTTGTTATGTGAGAAGCATTTTTACCTAGAGTAGAAGTTACACCAACTTTAGA
CTAAGGTTCTTTGACTTACCCATTGTTATTTACATTAGAACGTAATCATATTTGCACAAG
CATGCTACTTTGCATAAGCTTTCCAATAATGTGAAATACATGCATTCATGCTTAAGCGAA
TATGTTTTTAACTCATGTTGCATGATGCCCCAGATGAAAACCCTTTTAATTGGACTATGG
AATGAAACTAATTCTTATTCTTCATATGATTTTGGAGAATGTATGTACGTGTCAGAGAGT
TCATCGCAATCCTCTGAAAATCCTTCTCTATCCTTCTTTTCCAGCATCTCCGTTTTTACT
CATAGGATG
>comp702_c0_seq1 len=362 path=[1:0-361]
ATGCTTCATCGTGGTTGCTGATGTGGTTGGCCTTCAGAGTAACACTGTTATCAAATCAAA
TTCTACATATGATTGTGTTTTCCTTTGGTCATGGAGCTCTGCTATGAATAATGAATTATA
GCCAGTTTGAAGTTTTCTTTCTTCCCCATTAGAACAGTAGTTATTATATTATGTTTCCAG
GGTGTGGTAGTAGCTTCTAGGGCTAGCTCTCTTATCTCCCTCTCCCTCTCTTGCTTTATT
TAATGTGCAGTTAAAACATGTGCTATAAGTATTGAAGTGTGGTATCTTGATTTACATTGA
CTGATATATTTCGTTTTGCTAATTGATGGGTCCAACATCAGGTGAATGGGAATGCTGCTG
AA
>comp702_c1_seq1 len=545 path=[1201:0-544]
ATTCAATGTTAACCATTGGGCTGTCCCCTAGGGAAAAGTAGGGTCAAGTTGGTCTTAGGT
GCTTTGATGCATGAGCGTGAGTCCCCTATCAGCTGGATGCAGACATAAAACTCCTATTTA
AGGTGGAGGCTCTCCCCACTTATCAGCTTGGCTTTTAGGATTGGGTTCTCCTCTACATCA
TGTTTTGAGCTATAAATTTTGCATGGGAATTCAGGGTTCACATGTGACAATGGGGGTGTA
ATGCAATGTGTCATCTCTAGGCACTAACTATACTGCTTGAGCAGACACCTTGTAGCGGGT
TTTCTTGTAGGTTGTTTTTGTATGTGTTCATTTATTTTCTAGAAGCCCACTTGGTTTGTA
AGGTAGTTAGAATCTGCATTGCCAAATTATCCGGGAAGACTTGTACTTTGTTTTGTAGTC
AGTACACAACTTGTGCTTGTTTCCAAACACTTGAAATTGGATATAGTATCTGTAATGAGT
TCCAAAAAATAAAAACGGTAGTGGTTCTTGAATATAAATCTTGCCTTTATTAATGCTTCA
TCGTG
>comp703_c0_seq1 len=516 path=[1:0-515]
GAAGCCAATACGTGCAGAGATAGGTTGAGCATTCCTCGGGGTCGCCTCCAGATAGTTTGG
CGGCCATGGCGTACCTCAGGTCCCCACCGATGGTAGGTAACTTTACTGTAGCGTTTCCTA
GCCACGTACTATTATTATTCAAAAAGAATGTAACTTCCCCACTTTGCGAGTCCAATGGAT
TGTAAGGCGCCCAGTATGTTGAAAGCTTGCTGGTTCCAGCTTTATTCATTTCTACTTCAA
CGATGAACTCAGATGCATTAGCAAGCATAATGTAAACAGTGTCAATTTGATAGCTCAGCT
TGTCTCCAGAAAAAACAGCCACGGCTGTACCATTGTCGAGGGTCAATGTTGTTGACAACG
TAGTTGGAGAGAAGTTTCCATCCATCAACCTCAGGAGATCAATCTCAACTCTTGTGACTG
ATGATTTTTTGCCAACGGTTAAACTCAGCATCAACGTCGCTAGAACACATACTGCCAACT
TTCCCTGAGAGTGGAATGTCATATTTCGGCGTGGAG
>comp704_c0_seq1 len=406 path=[862:0-405]
AAGCCATAAAAACAGTTTTTCCCCATAACAAGTCCTAAGGTGGAAATTTCCGTGTAAAAT
CTCCGCATTTTTCTCCGACTAAAGACCCCAAAGAACAACATATAATGCACAACGCCAAAA
AATTTTGTCCTCCTACTCCTGCCAAAGTCTTCAAACTTGATAAAAAATTGCCAAAATCCC
TGAAGTCGCACCCAAGATTAGAAAATGGAAGTTGAACTTTGAAAAAAAATCACCAGAAGT
ATTCTGATTATAGATTAACAAGACTCCAATTTTAGCTTATGAACTATATGAAAATAAACC
ACCCCACCTTCAAGTAGCTACCGAATGAATTTTCTAGTAGGTATGATAATTCAATACATG
ATAGACTACTTGATACCGAGCTTGATGGGGAACCAGAGAAAGACCA
>comp705_c0_seq1 len=398 path=[639:0-80 345:81-84 349:85-397]
TAAGCTGTTAGGTGAAGGCTCAACATTGGTTTTATAGCTCTAACACGACCCCTCACACAA
GAGCTCCTTGGGCTTGAAGCATAAACAATGCACAGGCCCACTTTATCTTTTGCTGAAATT
TAACTTTTACGTAGAAGAATGAGGGCTGCAAGGATTTAACTCTTAACCACTTGGTCATAA
AGGCTCTAATAATATGTTGATAGTGAGAGAAACAGAGAGGCATATGCTGAACCGTGTTTC
TCAATTACACAACGGGACTGAATATATAGTAATAAGGTAATAAATACATGGATCCTAATT
ACAATAATTACATAATTTTAATTGACAACTGTACATACTAATAAAACACATGAAACATGT
TTTCCACAGTCCCTTTCAAGCTAGAGCATATAGATCAT
>comp706_c0_seq1 len=308 path=[207:0-307]
AACCTCCTAGCCCCACCCACCAAGCACACCGCCATTCTCGACCGTACCAACTCATCCTTC
CGAGAAGAATTCAGGGTGATAACCCTAGCCTTTGGAACAGGGGGAAAAACTGAAAATGAG
TTTAAAGGGGCTGAAGGGAGTGAGAAGAACGTAAGGAAAATGAGAGGTGGGACTATCAAC
AGAAGCAAGCGCCATTCCAGATCAGAAACCCATTTGGTAATGGGCATGGTAATTTTTTTT
GGGTTCTTTACCATCTCTTGCTTTTTCTCTAATTTATTTAGGCCAGCCAGCTTTTGACAA
AGCCTGAG
>comp708_c0_seq1 len=531 path=[1:0-530]
GCTTAAGCTTTTAGGAGAGTTAGTTCTTGACATGGCATCAAAGCCTCTTCAACCATGTGG
TCAGGAGTTTGATCATTGTCATCCCCATGCTTCTTAATTAAAAAGAATTTCAGCACAAAG
TATAGCGAGTCTGCTTTGACCACACTTGAAGCCCATATGGCTTTCGTGTGATGGTGTGTG
CCACAGATAAAAACAATTCTTGGGCCAAAGTGGCTGAAACAAAAAAATGCAACAAAGCGT
CCAATCTCTTTGCATATCAGTAATTAAAGTTCAATTGAAACAACCATGAGCAGAGCACTA
AAGAGAAGCCCTAAACACAATTTTATCCCCTAACAAATGTAAGGGCAAAGAGACAGCCTT
GAAAATTTGGGGATTCATCTCCAACCAAATACACCAGGGAACTGTATAAATCACACACAG
CCATAAATTCTAAGCCCCTACCCCCTCCTTAACAAATTATTCGATAATAAAATATCCACA
TTACCATGCAAAAAAAGGCGGGCTACTGTTTCTGAACTAGGCCTACACATA
>comp708_c1_seq1 len=328 path=[1017:0-327]
AAAAAATCATCTAACAAGAAAAACAGTATGAACAGATTTCCATGAATCAAATATTAACCT
TCAAAACTACACCTTAGTTCATCATTAGCATAAGACTGTTTAATATTGCATTCAGAAGGC
AAACACTGAATAACAAGAAATATCCATAATCCAGCTTTAGGGTAGTGTTGAGAATTTAGG
TTTGGAAATCAATGTGCAATTCTCTTACAAGAACACAGTCAGTTTTCATGTAGAGTGTTT
TTTCAAAATTACTTATTCATTACATGTACAGGTTTAAAAACTGTTAAGAGATAAACTCCA
CTATTGAGTCTCCACCTAACAGCTTAAG
>comp710_c0_seq1 len=418 path=[396:0-417]
GCATGCAAGTACCAGCACCGAGTTTAATTACCACCAGCAATTGAAATGACAAGCATGAAA
AGAAAAAAAAAGTATAACTAGAAACTATCATTGCATTCCATGGCTTTCAGATTAAGATTC
CCTTCATGTTAGGTTCATGCAGAAGCTATTTCATAAAATATTCTGAAGTAATATAACACA
GTTCCTACATCTTGACTAGCTGGCCTTATCTACAAAAAGTAATGTGCATCATTCTGCTCT
ATCTACATCATATTTAAGAATGGATTAAGAAAATGACCAATATACTGTAAGTGGAAGTTC
TATTCAAGCAGATGTAAGCCATTTCAAATATGTGTATACAAAAATCATTAGACCTAATGC
TCTTTGCTTCCCTCTTGAGCAGACAGATATCAAAGATACATTAAGACTATAGGGTCTT
>comp711_c0_seq1 len=528 path=[563:0-241 19:242-527]
GACCTGTGTTGCTGATCTTGATCGAATCCTCAGTTCTGTAGCCATAATTGGAATTTGAGA
GCTTACATGGATGGGGAACAACCTTGCCAATACTGGGCATTCCTGGGGCAGTGAAACTAT
GGTAACTGCCAAGAATAGAAGAACCTGCAGCAGGACTACAGCAAGCAAAATGCTCCAAAC
CATATGATGATCTCTCTTCAGAACTTGAGTCTTTGTGAGCCTTACTAGCTACACCAAAAG
CATCAAAACTCGATGTGATAGTTGACGAACCGCTAATTAGACTCCAAGGAGTTGATACCA
AACATTGTGAAGCGCTCTCGCCTCCTTCTTGCCATTAATACATGAAAGTGATTCTTTAAA
GCATTGTCAGTTCTTCCAGGGAAAAATTTGGCAATTGCAGCCCATCTGTTTCCCTTCACT
TTATGAAGGGCTAGGAGCATTTCTTCATCCTCATCAGTGAATGGCTTTTTAATGATATTT
GGGTCTAGTTGGTTGTACCACCTCAATCTGCAACTTTTCCCTGATCTT
>comp713_c0_seq1 len=906 path=[1618:0-216 715:217-905]
CTCCCCAGCACCACTAAGATAGAACAGAGAAGTAAATGGTTGTCATGCAACATTGACAAA
ATTAACCAATAGAAAAGATGGCAGGGGAAGAAACACAAAAGAAGCCCGTGCCAGAACCAA
TGTGGAATAATAATCCACAAGGGGTAGGATAAGCTAACTCCCCAGACAATGGTTGTAGAC
ATAATAATTAGAAATTTAGAACCATAGACAAGCCAACAGAAAATAAATGGATCGAAGATT
GACCACATGGTAAACTGCAGCACTAATTACTAACCGAACCAAGTAATCCCCAACAAATAA
AAAGGAACGGAACCATCATCAGATTCTACATTAGAAAGCAATCATAGTATATGTTTAAGC
GGTTTTCTTTCCTCTGTTAATGACATTAGCCAACAAATAACTAAAAAAACAAATGCAAGA
GGAAAAAGATACGAGAGAAAAAGGGAAAAAATGATGACCCACCAACATCCTCATCATCCT
TTCTTTATCCATAAAATCTAATAAAAACCACAAACAGAAAATTATAGGAACCGAACAGAA
ACATTTCGCAGCACTTGATGCCAATAAATAGTTAAAAGAAAATGCACAAACCGAGAGCAA
AAGAAGAGCAACAACAACAAAACCCGCATACAAATGAACCAATTAATTTTGTTTTTAAAA
AATACTTACAAGTGAAATTCCAACAAACTGATGGGAACCCATTTCATTTCTCAAGCAAAA
ACTCAGAAATTTTTTTTAAAAAAATTGTGAAGAGCAACAAAATCAGAGTTTCAAAGACAA
AAATGCAGTTCCCAAAAGAGTGTGCCTTTCCCAAACCAACCACACCCACAACAAAGACCC
AGATACAGAAAAAGACCAAGAGAGAGAAAAAGAAAGAGAGATTTACTTGTCATTGTTGTA
ATCCAT
>comp716_c0_seq1 len=774 path=[1:0-773]
GGGTGAGGTAAATTTGTAATCTCTAACGGCAAGTAACGGTAGTCGACTAACATCCACGAC
TGTTTTCTTTATTTTATTTTTTGTCTGGAATCAAAAAAGTATAATGAAAACGTAGAAAAT
TAGACGCTATAAGGATCGTAGAGAGTGGGGATCGACACTTAGGAATTACATTACGAGCAC
TGGAATGAGAACGAGCCGGGGAATCCACCGCCGGAGGAAGGGAAAAAGTGAGCGCCACCA
TCTCCAAAGAATGTTTGGAACACGTAGGACTCCGGCCCCTCTGGGAACCCACCGAATTCA
TCCAAGTTCTGGCCATTGTCGTACTTGGCTCTCTTCACTGGGTCGGACAGAACGCCATAA
GCCTCACCGACTTCTTTGAATTTCTTTTCTTGTTCCTTCTTTTCTCCTTCAGATGCATTG
GCATGTCGATCTGGGTGATGAACAAGAGCTCGCTTTCTGTACGCTTTCTTGATGTCGTCA
GTCGATGCAGTTTTGGGAACACCCAATATCTTGTAGTAATCTTTTCTTTGGGATTTCTTC
AGTTCGAGTTTAGCATCGTTCAAAAGCTTTCTTGTCTCTCTTCCTTTGTCCATCTTGGCA
GCTTTTTCATAGTCTTGAACAGCTTCCTCATATTGAGTCATTTCCATGTAGATCTGCGCT
CTTTTGAGTAAAGCCTTGAGATAATTAGGGTCCAGTTTGAGGGCTTCAGAGCAGTCAGCG
ATGCTTTCATCCATTTTTTTCAATTTTGATAGGACGAGAGCTCGATTAAAATAT
>comp716_c1_seq1 len=706 path=[2186:0-705]
TTGATGCAAGGTCAGTTCACCAAGGCTCTCGAAGATGCCAACAAATCCGTCGCAATCGAT
CCCAAATTCGTTAAGGGCTGGCTCCGTATCGCGAAATGTACAATGGCTCAAGGCGATCTC
AAATCAGCTGAAACTGCACTCAACAAAGCCAAAGAACTCGAACCTTCAGGAGCTGTTTTG
CAGGCGGAATTGAATAATTTCAACGACCTCAAGATGTGCGCCGAGAAAGGAGACAAAGCT
TACAACTCCGGTGATTACCGTATGGTGGTGTATTGTATGGATAGAGCTCTAAATATTGCC
ACATCCTGCTCTCGTTTCAAAGTTCTGAAGGCAGAGTGCATGGCTCATCTCGGCAACTAC
CAGGATGCTCAAGAGCTTGCCAACGAGGTTTTGGCCTTTGACAAACAAAATGCGGATGCC
ATACTCGTGAGAGGAATGTGCCTCTACTACCAAGACAACATCGATAGGGCGTTCACGCAT
TTCCAGCACGTTCTCAAGCTAGCCCCTGATCACGTTAAAGCCATGGAAATTTACAAGAAA
GCGAAAGCTTTGAAGCAGAAAAAGTAAGAAGGCAATGAAGCTTACAAAACGGAAAAGTAT
CAAGATGCGTACAGGCTCTACTCTGAAGCTTTGACAATCGACCCAAAGAACGTCGCAAAC
AATGCTAAATTATATTTTAATCAAGCTCTCGTCCTATCAAAATTGA
>comp717_c0_seq1 len=512 path=[1:0-511]
GACAATATTTGATATCTCAAAAAAATTATGACCGCCACGTTTCATGCGTTTCAAAATATG
ACATTTGTATGAAACTTTTGACGACTTCTTATGCCAAAAATAGTTTGTCAAGGAAAACAA
GACAGTGGTCAATAAGTTACTACATAGCACAATTATAGCAGAGTAAAAGGGTGGACCTCA
GGAACATTAAAATCGATGCAACAAAGATCCATTTCTCAATTAAATAGAAAACCCCACGAA
TAAAATGGCACTCAATTTCTCAATATACACAAGAAAACTACTATAGATAATCCAGTCAGG
TGCCAAGCTCATATACGAACTTGTCATCCCTCCTTTCAGATAGGAGTATTGTTAATGATA
GACTTCTAAACTAGTTCCATTATCTTCACCTCTGTATTCAGGCCAAAAGATGGAACATTA
GCTTTGAAACCAAAATAACATTTAATGAAAAATGTGTATTATGATTATGGGAGGAAAAGG
GAGAAGGCAAGCACAGGAAACCAGACAGACAC
>comp719_c0_seq1 len=421 path=[10:0-420]
GGAAAATTTGCGGGTATGCTTTGATTTATTAGAAAGTTGAAATTTTTATTTGATCCCATC
TTAAATTTTGGCCTGAATTATCGTTTTCATCAATATGGTTTTGCCACTGTTGGCTTTTGG
CATTTATTTTTGGTCGGTGATTTGGAATGGAATTGCAAATCACCATCCAAAAAAGGGGTT
TTAGATGCTATTGAATTTAACACACTGATTTTGTGACTTGAACTTGTTAGAAGGTGATTT
GTGCCATGAGGCACTCCTCTGGGATTATGCAACCGTGTCCGTTTTTTGTTTTGGTGGAAG
TTATCAGTGCAACAAAAATAATTTATACATAAGAGGCGCCCCCTTGCCATTGAGGGCGAA
AAGCGTCGGGTAGATCATTTGTTAGTAACACTGTAATCCCTAGCTGAGGCTTGTGGCATG
C
>comp719_c1_seq1 len=677 path=[815:0-676]
GTGGCATGCCCTGACTTTGGAATGAGGCAACCTCCCCTCAACCCTAAACTTTCTCTGACC
AAAATATAAGAGGCGCCCTGATATTCTTAAATATGATGGAAAATGGTTATTTGATTCTGA
AATGGAATTAAACATGATGGTCGCCTTGCACTTTGTGATGGATTGGATTTGTGTCGTTCT
ATTTGAGACTGAGTGAAGGCATGTTGCAATTTGTGGGTAGATACTAGATTGATAGCATTG
CTCAACATACCTCAGGGCAACAAAGATGCCTGCGCAGTGCCTACTTTACTCCAGTCTAAT
GACTAATGCAAACTTTTGCACCCAAAGTCTGGCCCAGCTTCCTGCATGAATGATTTATTT
TTCACATGCTTGTAACATGTGTTCCTTTAAGATTCTGTAAGCACTAGAAAGAACTTGCTT
ATGAGAAGTTACTTATGGAAACAGTTATTTGAACTGCCTTCTCAACTGCATATTTTTTGT
TGAACATCCACTATTTGTGAAGAAGAGCAGGATTATTGCCATTTTTTCTGCCTTAGTTGT
TCATTGCTTGGTTCATAGTGAGTAAAGGAAAAGAATGCATATTATGTTATTATGCTTACC
ATGATACCCAAGTGTGTCACTAAATACACTAAAAAAATGTTGTTTCTTGCTTCAGGTCGC
ATAGTCATGGGCCTTTT
>comp721_c0_seq1 len=423 path=[1:0-422]
GGTCAAGAAACCTGCCCCCAAGAAGATGGCCCTGAAGGGGAAAGGTCAAAAGAAGAAGAA
GGTATCCCTCAAATTCCTTCTTGACTGCACAAACCCCGTTGAAGACAATATCATGGATGT
TGCTAACTTTGAAAAGTATCTTCATGAGAGAATTAAGGTCAATGGAAAAGTTAACAACTT
GGGTAATGCCATCTCTTTGGAGAGGCAAAAGATGAAAATTTGTGTCAGCTCTGAGGTTCC
TTTCTCAAAAAGGTATCTGAAGTACCTTACCAAGAGGTATCTAAAGAAGAACAACCTCAG
AGATTGGCTGCGAGTTGTTGCTACATCTAAGGACACCTACGAACTCAGATACTTCCAGAT
CAACAGTCAGGAGGAGGATGATGATGAAGAAAACGATTAAATGTATAATTTGTGTGTGGT
CCG
>comp721_c1_seq1 len=362 path=[1140:0-361]
TTGACCCCTCCAGGAGCCTTCTTGGGTGCAGCCTTCTTCTGAATAGTGGCAGCAGCCTTC
TTCACAGCTGAGCTAGCACCAGCAGGCTTGGCAGCTGCAGGCTTGGCGGCTGCAGGTTTA
GCGGGGGCAGCTGCTGCAGGCTTGGCTGGTGCAGGTTTCTTAGCTTCTGCAGGCTTGGGG
GCAGCCTTCGCGGCGGCAGGCGCCTTGGCAGGTGCAGCCTTGGAGGGTGCAGCTGCTGGC
TTCTTGGCATCTCCAGCCTTTTTGGTGGCAGCCGCAGCAGGAGCTTTAGCTGTGGCCTTG
GCGGTGGCTGCCTTTTTAGGCGCCTCCTTCTTAGTTGCCGACGGCATTTTGGCTGTGGCT
CG
>comp722_c0_seq1 len=1339 path=[587:0-1042 21:1043-1338]
GGGTATTCAGCGATGATCGCTGGTTTTGTCGATTCTTTTTTGTTTTCAGTTGACCCGATT
TCCCTCCTTTTTGTTTTAAAATTCTTAGCTTTTTGATTTTGTTATCGCACTTCATGGCCC
CCTTGCGTGCTGGGTGCTCCGTGTGAGCTTTGTTAGCTTGGAATTGGTTGTGTTTAGTGA
GGCGAGAAGGTCTTGATTGCAACATTGTAAAATTTGGGTATTTTATGTGGAAGTATCCAG
CTTAGTTCGCTTTGTGTATGGTTTTTGATTGGCACTTTTATGGTTTTCTTTTATCTCCTT
TTCTCCTTTTCAATGACGATTGATTACACTATCGTTACACAAAGGAATTGAAGTTTAGGG
ACTTTTGCTATATGCTTAGAAAGGGGCTATGGCTATGCTATGCATAACCTTTAGATAACT
TGGTTAAGATTTCCGTTTAGACTTGATATAACTGTATATCCTTTTTCTCCCTCATTTTTG
TTTGTGGTAGGTTTCCAATGGGGTTAACACGGATGATTTGTTATGGATGTTGAGGTCATG
GAAGGATTTGTACGAGAATATATGTCTCAAGTGATTGAAACTCCCTAATCATGTAGTTGT
TTCTTCTTGCGTTGTTCTATTACGGGAATATGTGCTTTACATGTTGAATTGCTGGTGAAT
ATTTTGTTGATATGATTTGAGTAAGGTTTTATGAGCTGTGCTGTGTTGAAAACTTGATAG
TGAAACGATTTTTATGGCTGGAGCTATTTTTTAGGATCTTCAAGGATAATTTATATGCCA
CTGCAAATTGGGTTGTGTCTAAGTCTAACGCATCCTGTGCTGGTTTGCCTTTCAGATTTT
TCAATGGGTTTTCTTATAGATGTATTTCATGAATAGTGGCCTTGTTATTTTGAATTTTTT
GAAGCTTTCGTTTTGTTTCTGTTCTTTTTTAAATTTCTATATACTCTTGCATTTCTTAAT
TCTTCTCATTCTCAACTGATAAGTTTCTTCTTTGTGCAATAGAAAAGAAAAAGAAAGAAT
GGTATTTTTATTTTTTTAGGGCCTGTTTTTCTTGAAAGGGTTGTGTGTTGGCAAGTAAAG
TTAAGGGAATTGAAGTGATCCCTTCATATGCAAAACAGACTTATATTCTTTGCAGATATG
CCAGGTTTCCCCCCCAGCATTGCCGAATATATTGTCTCAAACCAAGAAAGAATAAAAATA
TAAGTTTATTAATTTGTATTCTCATATTGCCTGGTCAGGTAAACTAAACGAATTTGTGTT
GGGCTATTTATTTCTTTCTCTTTGTCCTTTTAAGTCTAATTTGCACCTGGCCATCAAAAT
AGGACAATTTTATTGAGGT
>comp728_c0_seq1 len=309 path=[1954:0-308]
GTACAATGAATTCTAAACTTAAAGAGCCCACCTGCTAGGTCTTGGTATTTTTGGCTACTT
TGTAGTTCTCTGCATTTGAGTTTCTAGAGGGATTTATTATATTACATTGAGAGGGATAGA
AGAGAACTCATATTTATCATTTAGTGACTTATTTGTTTCCTTCTGAGTTCATCTTGTGCT
CCTTATTCCTTATTATACTACTCACCAAATTCTCCCTGTTCAATGAAACTTTTTCTTTTA
GTTATAACTATTGATTATTAATAAAAGAAAATGAGAGAGGACATCATTCTGCAGTTCCTT
CCAATCATG
>comp728_c1_seq1 len=988 path=[966:0-987]
TCCTTTAAAAGGACCAAAACTATATTAGCATAATGAAGCCAAAGGAATTATCTTGTCCCA
AAATAAGGCAGATGAAAATTCAAGGGTTCCCTTTCCAGCCAAATGCTTCATATCCATATT
GTTGCAATGTGCAAACATCTGGTTCTAAACTCTAAAGTATTTTTTCTCTCTTTTATAGCT
GTTAAAACAAGTCAATAAGGACTTCTCCAGTGATTGTGGACAAACTACTTTTAATAATAA
TATAAATGATTCAAATAACCTGCTCCAATTTACCATGCAACTAAGCAATGCAAAAATAAA
CCTGCCTCAGCCTTCGTATTTTGTAAAGAAAAAATGCATTGAGCTGTATAAGGTCTGCAC
ACTTGCAACACATCATTGGTGTTAACCTTGTTAAGAAACACATATATACTACACAATTAA
TTATAGAAAGAATGTTGGCTTTCAAATATGATTAGCAAAAGGAAAATGATTGAAATTCAG
GAGATGAACATGAAGTGCTAGGTTGTTTTACAAAAGGATTCCAAGCTATCCAATGTCTTA
ACATAGAGAAGCAGAAAGAGTCAAAGGATATTAAGAAGGAGGTTATGATCGAAGGTTTCT
ATATCATGTAGATTCTTGTAATGATGGAAGTTCTGCCTATGCATGTGATACCAATCGCCA
ACCTTGTGCTAAATTGATGATAGAAAAAAAATAATCTTGAGAAATAAAATTTTAAGGGAT
TGCAGAACTTCTCCCTTTTGCCCCCTGCTCATATTGTTGAAAACGATGTATCCAATCATT
TTGTGCTAAATACAATTTTTTTAAATAATTATATGGTGGAAGAAATTTCAAGAGAGAAAG
GAGTTCAATTAGGAGGATAAGAAAACCTAGCAAAAAACAGAAGGAAGAAAGAGGAAAGCA
TATTAAAACAACTTAGGCCTGCCAATCCTGTTGTACACAGCCTTCAGAAACACGCCCCAA
AATAACCAGAGGGAGAACCATAGGGAGG
>comp730_c0_seq1 len=317 path=[295:0-316]
TGAGGTGCACCTTTGGAGCTTTTGCTTGTTAAAGATGTGGAAATTGAAATTGGTATTTTT
TCAGTGTTTTATTTTATTTTATTTCAATATGTTGTTTCATCATGTAAAATGTTAACCAGA
GAAGATATTTAATTATTTTCAATTATTTTTTTGGTTTGGTATTTGGATGGTTGGGGTGCT
TTGATTGCATTGAAGTCCCTGGTTTTTCTGTGGTTAGTCATTTTATTGCATGTCTTTTCT
TCGGATGGTGACGATTGGGGATGGTTAAGAAATATATCATATTAAAATACTGACAACTTG
ACACCCTTAGTTTTACA
>comp730_c1_seq1 len=421 path=[589:0-420]
GGGAAATAGAAGGAAATAAAGACAGGCAGGTAATTTCCTATATTGATATGTTAATTATAT
GTATATTCAAGTTGAAGAAAAAGCAGCATAAGAATTCTAACAATGAATGAAGCCACCAAC
GACACATGGCTCAAAAGATGAAGCAATCAACCTAAAACAGATAAAGTTCCTCACTCGAAA
AACTATGGGGGCAAAGTTTGGGTGGACCTGTTAAAAATATTGGAAAGGGGTGAAGGAGGA
GGGCAAAATCATTAAACATAAAACATAAATGAATGACACAAATATGCAATTAAAAAGCAG
ACAATAAACAGCAAAGTTGATATTATGAGTTCAGTTAATTCTAAAATGACAAGCACATGG
TTTACTCACATTTTCTTCACCAAAGAAACTATATAGATTAAATAAGACATGTAAAACTAA
G
>comp733_c0_seq1 len=709 path=[687:0-708]
GTTGACGAGAAGCTACGAGGGAAGCTACAACGGACTGGATCAGCCGTGACTGGAAGTCCG
AAAATCAACATATACGCCGCAATACGATCACCAAACATCAATCATGGCCAATAATCAAAC
AGGAGGTATCGTCTTCAAATGGAACGCAAAAGATTTGAACGTGCAGACCAATGCTATACT
GAAAGTCATACAGCCACTAGTAATACAGGTCACTACATTGATGAATACAAAACAACAGAA
AATAAGAGGTAGGAAAGGGAAATCCAAAAAGGCGCACATACTTGTAGCAGCGGTTGACAA
AGCAACGGAAAATTTCATCGAAACTGGCGTGGTTATTGCGAACGAAAACCCGGAGATAAA
AGAACAAATGTTAGGAGCGGTCGACGAAGTGAGAATATCAGGGGAAGAAATGAGCAAAGC
ATCCACGGAGTTTGCAGATGATCCATGTGTGTCAACAAAGAGGGTAAACATGGGAAAAGC
AGCTCAAAACTTGCTGTACGCCGTCACAAAGCTTCTGATTTTGGCAGATATGGTGGACGT
GCAGCTGCTACTCAAATCATTGAAAGTCGTGAAAGATGGCGTTGATAAGGTGGCCAATTC
GGCAAACCAGAAGAAACTTTTGGAAAACATGAAGAACTTCGACCAATATACAAACGATTT
GATAAATCAAGCAGGACTCAGACAGAATGAACTCAGAGATCCCCGATCA
>comp733_c1_seq1 len=423 path=[1373:0-422]
CTTCCGGACGGCGTTGCATTCAGCGTATATTCCATCTCTTCTGTCATCTCTTGTACATGG
CGAATCTGCGATGAGGAAAGCTCCATTAATTATGCTTTCCAAACACTCCTCCAATGTCGG
GCCTTTGACAGCTTGTTGCGAGGCCAGAGGTTCTGAATCCATCGTTCTGTCTAAATCGCT
GAAAGCCTGAGCCAACTTCCCTGGACCCTCGTAACAGTGGGTTGCAGTGGCACCTTTATT
TCCTTGCGTCACGTCATTTATCGTATTCACTGCTTCGCATACCTGTTTGACCACGTAGTC
CCTGTTGGCTTTAGCCTCAGCCAATCCTGGGTGATTCACGAACACTTTGGAGGCCGTCAG
AAGCATCGTAGAATGTTTCTTGAGTACTGCTCTTGCAGCTGCCAAGTCATCTCTTGATCG
GGG
>comp734_c0_seq1 len=372 path=[387:0-371]
GTGGTACACTCTTCATTATAATAGAACCTTTTGTATCAAGTTCATTCATGTCAATGCGTT
GTACTCCTTGACAAACTTTGATCTTCGCTTGTACATTTTGGGATTTTCTCATTTTCATTA
TTGTTATAAAGTGCAAACAATTCCTGCACCATTAGTTTCTGACATACCATAGTGTGACTC
AATCACACTAAATCCTGGTTCTTCTATCTTATATTTTAATTAATCCTAGTCCTGCACCAT
AATGTCGTCGCTATTCTATCAGCAGCTTATAAAAATAAAAAAGCAAAAGATGAGTTTGAC
ATTGTACAGAACAGACATATAATACAGATAAAGACCCAAATTTTTTTTAAAAAAAAGACA
TGTAAAACAGAT
>comp735_c0_seq1 len=910 path=[1235:0-633 48:634-909]
TTTTTTCTTTCTTTGGTTATATCTCTTGCGTCTGTTTTGTGTTCTTGCGTAACTCTTCTC
ATCCACTTGTTGGTCCACCCGATGAAATGTGTTATTTCAACATCTTCCCTGAAAAACCCT
AATAGCCACATTCGATTCTACACATGATATTGTCTATCGGCTATGAGTTTTGTTTTTAAA
CTAGCGGCCCATATGGTGAGATGTTGCTCTTGTGTGGAGCTTTGCTTAGCTAAACTCCCT
TCTCTCTCTGGATTCCTTATTTCATATTCTTGCCAATTCGGTAGATGTGGTTTGGATCTG
GAGTATTGCTTGCTGTTGGGTGTCGGTGACATTTATGGGTGTATGTCAGTTCAATCATGG
ATATTTTTGTATTTGAGTTCTTTGTAGGTCTGTCTGAGATTGAACTTTCCAACTTGGTGC
ACACCCACTCTTTGATAAAATGCACAAATGAAATATTCAAGGATGGTATACTTATGCTTG
TAGAATATCTGTATATACTGAGAAGTAGCTTTTGCACCTTTATTTCTTGGGTTAAATTAA
ATAATTATATGGCATGTACTCTATTTGGTTGCAGGTGGTGTTTCCAGCATCTACTTATCA
AGTACAGCTTTTTGGATTGCTTTATGCATATAACGTCACAATTTTAGGTGCCACACAGGA
AGAATTGGATGGGAATTGCTCGGTTCAAGTATAGAGTCTGCAAGCTAGTATTTCAAAGGA
TCTAGCTGTGCTTTGGGAATTGGGACACAGACTTCATTTAAGAGGAGGAGCTCTTCAAGC
AGCCTAAGTTACATTTTTCACTTATATTCTTCAGTCTGTGCCTTACCAAATTTTTTGGTT
GATGAGGGCATTTATAATACTTGTAATTATTTGGTGTTATTTGTCAAGATTAGTTCTGCC
TATGGAGAGG
>comp737_c0_seq1 len=693 path=[1488:0-692]
GCTTTGGATTTCCAAAGGGGTTTATCAAGAAGGAATTTCTCTCTATTCTAAGGATGGGAA
AAAAATTGGAAGAACTAAGAAGGACTAATAAGAATACACGACTGCAGGATCAAGAGACCA
CATCTTTTATTCAAATTCTCACTTTATCATTGGCATAGTGTTACCTAAATTAATAGCATC
CAAGAAATGCAATATGTAAATGGTTAAACTTAAAAAAAGATTGCTAAATAAGCAGGAAAG
ATGCATGGTCCTAGAATCTTCAAGTTAGAGATCTCCAAGATTAATCAATAGGTTATAGGA
TGACAGCTTGGAGACATTGCAACCCAATATTAGAAATAGTAGAGTACTTTAGGTTTGCAA
AATTTAAATTTTTTTCTTTTTTCTTTTATTTAATATCAATTGGATAAAGAAAGCTCATCC
TTCAATAAAGGCTCGAAAACAAGTGACTTAAGTTATTACGAAATATTCTTCTTTCCCATG
CTATTTTGCATTTCTTAATGATGCAAAGCAGCCAATGTTCTAGTAGAGAGGCCAATCTCC
ATTTGCTTCCTAATGAAGTTAAGGTAATAACACCAGTGGAGTGTAGCTCAACTGGTATCT
CTCTAGGTCTTTAAAAGGGGGCTGTGGTTATGTGGTTGGGGTTCCATCCCCCACATCTCC
ATTTCCCATCCCCCCTTAGGTCCAATATGACCT
>comp737_c1_seq1 len=339 path=[454:0-338]
AAAATGGAGAAAATTTGTATTTTTTTTAATTAGTGTGGATAAATAGGAGACTACCACATG
TATTAATCAATACATGCAAGTCACATGATAAACAGTTTATTCTTAATTAGTGAACAAAAG
GGTCTATTTGCAATTATCGAAAAGTTTAAGGACCTCTTATCCAGATCTAAAACTTCATGA
TGACTACATCAAAACGAGGTAAAGTTCAGGGTTGTTGATGTATTTTTCCCTATTTTTATG
TGAACTTGCAAATAGTTATTTCTCTAGTTCGTGGCACTCAATACATGTATCATTATGTGA
CTTGCTTATTTTTAGTTTCTAGGATTCTCTTTAGGAATA
>comp740_c0_seq1 len=523 path=[501:0-522]
AAAGAAATTTGCTGAAGTTTCGAAAAAGCTATGTAAGATCCCTATAAGAGTGAAAGTGGT
GCAAGAGAACATGGCAAGAGTTTTAGAAGTCCATTTTATTGGTGCACTAGTACCAACTGT
TTACATGCAAAGGAAGGTATCGAGCTTCAGCATGACCTCAACATAGGCTGTCTTGCTGGA
TTTGCTGCTGCTGCTGCAGTGCCACCACCCTTCTCGATTTCAAAGTTCTGTTGTGTGCAT
TTTTTTGTTCAATCATGCATGCTTTTAGAAATGGGGTCATTGATAAGGGGATAATGTAGT
CCTTCCTCCATTTGTGAGTTAAGGCAATTAGAGGGCCATTAAGAATTATGTGAAATGGGG
TCTTTGTAGAAATGCTTGAAATGGGGTCACTGTTACTAATTTACTAGCGCCGCAGAGTAC
ATCTTGAATAGAGCTTGTAGAAATAGCAGCAAAGCATACTACTAATAGTTCCAATCCACT
GGTAAAGTCGTATAAGTCAGAGTACTTGATACGTTGATAAGTG
>comp742_c0_seq1 len=443 path=[619:0-442]
GTTTTCTTTCGTATATCACTCACTAGGATAAATTATATTCTTGCCGGTTTAGTTTGCTTA
TACTGTAGTGTCCACATCATGTGCTGGCCTATTGATGTGGAACTGGTGGGGGAAAAGAGA
AGAAAGGATGAAATTGACAGAGAAAGGGAGAAAAATCAAAGTAACATAGGTAAAGGAATA
GAAGAATAGGAGGAAGGAATAGATTTGAGAGGGAGAAACAGAATAGTGATGCCCTATTCA
ATCTCAAATTCAAGTCTCTAAATCTGCAATACTCAGTACATAGCAATCCTTAATAGGCAA
ACCCAACTTGATGACCAAGTAATCCTGAACGACTAAAAACCCTAAATAGCCCTAATTTAT
TTAAAAAATCCCTAATAACCCAAAAAATGCTAAAAATTCCAAAATTACGGTAAATTCTCA
ATATATTATTCCATACACCTAAT
>comp743_c0_seq1 len=397 path=[389:0-396]
CTATGCATAATTAATTAGTCGACATGAAATCATAGAAGTAAAAGACTTTTTACTAATATT
TCCTCTAATGGTAAAACTTCTTGCAGGCATGGAAGAACTGGGTGAAAGGGACTGCCTCAA
ATATTGTAGATATAACATTAAACGATAGTTTCAGATCCGAAATAATGAGATGCATTCATA
TTGGGTTACTATGTGTTCAAAAATATGTGGCTGTCAGACCAACCTTGGCTTCGGTTGTAC
TTATGGTTGGTAGCAACTCTCTCTCTCTCCCGGTACCGTTGCAACCTGCCTTTTTTATGG
ATGATAAAAGTTTACGACCCATCCAATCTCGGGAATAGTTTGTTCAACAAGATCAAGTGG
ACAAAAAAGTAACTCTATTCATGGATTAGTTAATGAG
>comp744_c0_seq1 len=475 path=[1:0-474]
GCAGGAGCCAGTGCAGGAGCGCAAGCCGGTAGTGCTGGTATCGGTGGTGGATCCACAGCC
TCGGCCTCAGCCAGTGCTAGCGCGGGAGGTTCTTCGGGCGTAAGCGGAGGAGGTGCCACC
ATCTTCGATCAAATTTTCAACATTCCCATTTCGGTGCTGAAGGCTGTCAATCAACATGTC
AACAACAAAGGAGTGAGCGTCCAAGGATCAGCTGGAGGCTCAGGCGCTCAAGCTGGCGCT
CACGCAAGCGCAGGCGCAGGTATCGGTAAAGACGTCCACAGCGGCGCATCTGCTGACGCC
GGTGCTCAAGCTGGATCGACACTCACCGTCAGGAAAAACTACGACAATGTTTTCGCTATC
CCGATATCAGCACTGACGTCCGTCAATCAACTTCTCAACGGTAAGAAGTGATTCGGATCA
AACGGTCTCGAGATTCACCGGCTGCTCGCCTCAGCCTCACTGGTTACCGGTCCAG
>comp747_c0_seq1 len=528 path=[506:0-527]
GGAAATAATACAAAAATTGTTAGACTAATAATACCGTCACGTAAATAATTAGTGTCAACG
AGAAAGTAGAAAGGCCCCAGTCACCATTTTGGGAGGTTAATCTTCGTACCTATCTTCCAT
GTGAGCGTTCCTGTTGATTCTCTCCGCCATCCGAGGAGATCGAATTTCCGCCAAATCCAG
CCCTCCTGGGGTGTAGGTGAAAGGTTTTTTGTCTTTCATCATGGCGTTCTGAATGGCGGC
AGGAGGTTCCTTTCTCATCGGAGGGATCTCTGAAGCAAGTTTTTGACTCGGGATGTGCCC
AATAATCGGTGGCGGTGGAGGAGGACCGTCTACTGAATTTATTCCAGGGGAGCCACCTCC
GCCGTTTCCGCCAATTTGGCTCGATTGCCGTAGCATGCTTTCCAACTGCCTGCCGATGCC
TTGATCCTGCGTCACCTTATGTCGAGGCAAAGTGGCGATGTAAGCGTTCGCCTTCGTGTG
ATGCGCGTTCAGCATGTTCCGGTACATGCTGTTCGCCAGCTCATCTTC
>comp750_c0_seq1 len=847 path=[1:0-846]
GTAGATCCCTCCTCTGTACATCATAAATGCGTTGTCATAAGCACCCACGGTAACTGAGAC
TGGACCAACGTTGGCGACCGCGTCCATCAGGTCATCTTCACTTCCAGCCTTGATGTCCAC
GTATCCCGTCACTGTGGCTCCGGGCACAGCTAAAGTCTGATTATAACTGCATTTTGAATC
GTAGCCGTAGTACCAATAATAATCTTCACTGTCGATGCCGTTCTGCTGGATGTATTTGAA
TGCGATGTCAACCCAACCTCCTTCACACCCGCTATTACCAAGACTAAACGTACAGTCAAT
CAAATTCTGAGGACTCAGAGGTTCGAAGTGCAAACCCTTTTTGATGGCCAGCTGGCCTGT
CATCGATCCAATCGCGCTGAAAGCCCAGCTTGACTCGCACATTTGTATGTAACCAGGATC
AGAGACGACTCCAGCAGTGGTTCGCCAGTCGACGGAAGGTGGAAGCGTCTGGTTCGAGTT
CACGTGCACAGGGGCTTTCATCGACGCAGCTGGTCGACGAAGTTTACCACCACGCCGCAA
TTCATTCGTACGTAAATCGGCGAACTGATTCAGGGCGAGTTGATAGCTAACTTCTCCTTT
CTCGAATTTACTATTGTGGTCTTCCACCATCCGTCTGTTTTCCAAGTAGATTTCCAAGCG
CTCGGCCTCCTCTTCTTGACTCACGTATATTTTTCCATGCTGAGCCTTGAAAGCTAACCA
TTCCGCAGCACTGATTTCCGTCTTGGGGAACGCCGATGCCAACGCCAAGAGACAAGAAAC
TGCTAAGAACCACCTCATGATTCTGTTTCTTCTGATCACAATTACATACACGAACGGTGC
TATCCAG
>comp750_c1_seq1 len=307 path=[1649:0-306]
GTCACGACAACTTGATATCACTATTCACTAAAATATTGCCCATGGTGCTGATGGTTTTGG
AGGCGCTCAGACGGTGGGGTACGAGGCCTGGGAAGCGATGCCGCAGAGGTTGTTGCCGTT
CCTGGCGAGACGCATGTATCCTTGCTCTCCCCAGCTTCCTCCCCACACGTTCTGGATGAT
CCAGAAGTTCTGTCCGTTCTGAGAGCCGTATCCGACCAGCAGAACGGCGTGCTGTGGTTG
TGTAGGGTCCGTCGTGCACGTATCTGGAGATGGATTGTAGATCCATCCTCTGTACATCAT
AAATGCG
>comp752_c0_seq1 len=570 path=[259:0-569]
TTTTTTTTTTTTGAAGGAAAGTATATAATCAACGAGTGAAGCATGCCAGTGACATGCTAG
CATTTCTTATACTATTTATGCAGAGACTCTTTATGCTTTTCATGGAGATCTTTTTGCACT
TGATTCAAAATTTTCATCATTGTTTAGGCCTTTTGAAATCTTAGTATGAGTTCCTTGATA
TGTATTTTTCCATTTTAATAAGTTGATAGCTGTACTATAATGCATGTCAGAGCAGTGTCA
GCAAGCTATTTGTTCAAGTGAGATGTGGTAGAATATTTCATCTAAGGATCTGAATGTCAT
TAACTGTTTTGCAAAGGCTATAAATAAGTTGGACAAGTTTTTTTATCCATTCAAGTGGGT
ATAAGCACCTATTTTAACCTTCACTTTCTCCGTATTATATTTTTTGAGGAGGGGAGTTAA
TGGTTTGCTGGATGGTACATTCGTTTGAAGTTGTTCCAAACTACTATAGAGCTAATGTGG
AATTGGATTTTTACTTAATAGGACCCTCTGTACTTAGTAATTCTGTATTTTAGATGTTCT
TTACCTAAGTTAATTTCATTTGATATAATG
>comp753_c0_seq1 len=502 path=[425:0-501]
GAAGAAGGGAAAAGACAGAGTAATATTTAAAATTATAAATTGCTCTGCTGAGGATCTCCC
TGCATTCCCCTCCTCCCAATCAAAGAAAAAAAAAAGTGAGGCCTATTCTCTGCCTGGAAG
TTTGTAGGAATTATGATTGCACTCACAAAACAATATATGTGACTGTAAATCCCAGTTTAA
TAAAATACTGAAGTCAGGTTTTATCGTTACGTGAGAAGATTTGCCAGCTAGTTAGAAGAA
GACATAATGATTGTCTATTTACTTTAAGGTGATTTCTTTGCCTTGTTCCTTGTACCATAG
TGGCATAGAAAAAAAAAATTCATGAGAAGAGGGAAATGTGATTCTTACTGGATATTTGTG
GACGTCCCCTTCTGCCCCATTCTTTTGGAACAATTTCTTTTGATTAGCTTCAGCCTTCAG
GTGCTTTGGTAGAACTAAGGAGGGAAAGGCTCTATGGTGTAGTCAAAGGCACCAAAATGC
GCGCCTAAGGCACGGAGGTGAG
>comp758_c0_seq1 len=464 path=[1:0-463]
TATGACAGCCTTTTTCTATTCTTTATAGACTTATAAAATATATGTGTTCTCTGCATTATT
TTAACAAAGTAATATGAGAAAATATGATATTTTGTCATTAGCCTGGTCTGTGCTCCATTT
ATTAATTAAAACATTTTCAGGGGCAAACTGATTGTTATTTTAACGCGCCTTCGTTAGATA
TTGCTTTTTGCTACTGTAGCAGAATATTCTTTTAACATTCTATTCCTTTTGCCATAATGT
TTTACTTGGTCCTAAGTTGTGAGAACCCAAGTAGATTGCCCCAAATTGTTGGGATTAGGG
CTTAGTCAAATCAGTTATATACTTGCTATTTTGGCTGATCAGTGATTGGATGCAAGCATA
GGTTTTGTTAACTGTCTGTCTTTAGGAATTCAGTGCCAGGCAATTGAGAGGGTTTTGGGT
TCTTATTTTGGGCCCCCAGTTAGAAGAGAGAAAAAAAAAAGGGG
>comp759_c0_seq1 len=331 path=[1:0-330]
ATCAGCCTTCGCGTCCACCTCTTCCTCTTCCTCCTGAGAACGGCCCACCTGCGCTTGGGT
CGGATCATCCTGTTTGAAGATACCCAGATTGAAGGACTTGACTCGCTCCAACAGGGACGG
GGCTCGGACGAGTCGGGGCGAGTCGTGGTTCTGGACCGGCTCAACGACTTGGGTTTCTTC
TGCAAATGTTGGTTGGTGTTTATAGTGACCGAGATTAAAGGACATGGCTCGGTCTAGGAG
AGACGGGGATCGGACGAGTTGGGGTGAGTCATATTGCCTTTTGAGGGTGGCGAAACGAGA
GGTGATAGCTATGGTACCGATGACGAGGTTG
>comp760_c0_seq1 len=408 path=[1:0-407]
ATAGGGAAGGGCCGAGGGCAGGAGGAAATATCTGGAGTTCCAGATCATGTAAGTTTTATC
GTTGTGTTCGGGCTTATTTAAAACAATAATATAAATTCCTTGGACCTAAAAATATACCCA
AGTTTTCTCATTCACATATTGGAAAGCCTCGTTACCAGAGATCCACTCATAACCAATATG
GCTCCTTTAACCTGCAAGCCAAAGATCCACATTATCGGCACACCACAAGCTCCAGACATA
ATCAAAGGAGACTGGGCCCGGGTTGACTTGTCTGCAAAACCATGGTTCATCACCCAATAG
TTCTCTTTAAAGCTAAATTAAGGTTACTTGGATTTGCATGTATACCCAAATTCTCCTCCA
TTAACCTCCAACATGCGGCTTGTGCTTGCTTCAAAGCTTCTTCCTTCA
>comp761_c0_seq1 len=608 path=[325:0-323 944:324-607]
TCACCAAGGTAGCTGTTTATGTGAGCAACATAAGACGCTTTTTCTGATTTACTGATTGTG
TGAAGAAGGGTTGTTACGGTTGCCTTAAGGAATGATGAAGAATTCTTAGTACCACCTTGT
TTGACTGTAGCTTGGCTTTGTAAATTCAAATATGCCCTTAAGAAAGTTTCAAAATCAACC
TCATGGGTCAAGTCAGTGCCTGACTCACCCAAGATCCCCCTAATCTCCTCCTCACTGTAC
ATGTCTCTGAAAGCCTTTAGCTTCACCATTAAAGGTGGCAAATCTCCAAATGTAACTTCA
CCAACCTGATTCTTTAAAGAAACAAATTTTTGATTTTAGGCTGTGAAGTTCGACCTGCGT
AAACTGACTTTGAAGCCATTGATCAGAGACAATAGCACCCTCGAATTTTGACATTTCCGT
GAATCACCAACAAGAATATAGAAGCAAGAAGTGGTTTATCTCCTGGAGTCACCAGCTGCA
GTCCAATGCTATGCCAAAACCAAAAAAGAATCAGAGATGTATTATCTAATAAGGTTCAAC
AGCACTCCATTATATCAATGGTAGCACGTTGAATGCAGGAAGATGGAGAGACAGAGAGAG
AGAGAGAG
>comp762_c0_seq2 len=631 path=[1:0-228 230:229-300 1138:301-630]
CAAAAACAAAAAATACATTCACTCAGCACACTATGAGACATTAATTCTCTTCAAATGTTA
GCTCATCCATCTTTTCCTTCCTCTCCTGTTTGGTGACATATACAAGGACAAAAGACACAT
CCATCCATCCGCGGTATAGTGATCTGTACGTCCGAAAGAAAATTCTTCTCTTTGTATGTT
GTTTTTCCATTTCAGGATCCAGATACTAAAAACTGGTGGCTAAGAGCTAATGACGTCTTC
GTTGGTTATTTCCCAGCTGCTTTGTTTTCTAAAATGGATTCTGCAGATCAATGTGGTTGG
ACTGGGACAACGCTTACTAATATAGGTAGCACTAGTCCTCAAATGGGATCTGGAGCCCAT
CCAGATCACGATCATACTCATTCATCCTATTTTTGTCAACTTGCATTTAAGGAAGACCCT
CGAAATCTTGCCCCCGATTCTGGCCCCCATCCTGATAGGGTGGAGACTTTTGCAGACATC
CCTATGTGCTTTGAGGTGATTTTCTATGGGTTTGTGGGGCTACCCATGTTATATTATCTC
GAGTACGGGGGACCTGGTGGTAACTGTGGTGATTGATGCTTATTTTGATGTAATTCCTCA
AAAGTAAAAAATGAATAAAGGAACAGTATTG
>comp763_c0_seq1 len=341 path=[1:0-340]
GGCTGGTATATTGAACTGGTCAGTCGGGATGCCTGCTGATGTCATCAAAAGCCGTCTCCA
GACAGCTCCTGAAGGCACCTACCGCGGTGTGTCCCACGTCTTTTCCGTTCTGATCAAAGA
AGGAGGTCCTGCTGCTCTCTACAAAGGTGTCACTCCAGTCATGCTCCGAGCCTTTCCGGC
TAATGCTGCTTGCTTCCTTGGTTTCGAAGCTTGCATGACTCTCCTCAACATGGTGGCTCC
CAATCTCTAGCACGTCACTGTCAAGATGCCATAATATTTTTTAATTTCATCTTCCAAGAC
TTTTACAGAAGTCGTTGAGACACATTAGATTATTGTTTTAG
>comp763_c1_seq1 len=379 path=[993:0-378]
GTCGGTAAAAAGCTGCTGGGATCGGAAAAAGAAGAGCTAGGTTTGCCTAAATTGTTCCTT
GCTGGAGCGTTTTCTGGTATCTTCACGACTGCTGTTATGGCTCCCGGAGAGAGAATAAAG
TCTCTCCTTCAAATCCAGCAAGGTATGGCACAGCCGAAGTACAGTGGACCCAAAGACGTA
GTCAGGCAGCTGTACAAAGAGGGTGGAATCCGTAGCATCTTCAAAGGAACAGTTGCCACT
TTGCTGCGCGACGTTCCAGCGAGCGGGATGTACTTTATGACGTATGAGTGGATTCAGAAG
ACTTTGAAGCCGATTGGAGGTGAGGATCACAACACTCTTCTCAAAACCATCTTCGCCGGA
GGTATGGCTGGGGTATTGA
>comp764_c0_seq1 len=346 path=[26:0-189 641:190-345]
CCCTGATGAGGCCGTTGCTTATGGTGCCGCTGTCCAGGCTGCTATCTTGAGCGGTGAAGG
AAATGAGAAGGTTCAGGACTTGTTGCTCTTGGATGTCACCCCTCTGTCTCTTGGTTTGGA
AACTGCTGGTGGTGTTATGACTGTTTTGATCCCGAGGAACACAACAATTCCCACCAAGAA
GGAGCAGGTTTTCTCCACCTACTCTGACAACCAGCCCGGTGTGTTGATCCAGGTCTATGA
GGGTGAGAGAGCTAGGACCAGGGACAACAACTTGCTTGGTAAATTTGAGCTCTCCGGCAT
TCCCCCAGCTCCCAGGGGTGTTCCTCAGATCAATGTCTGCTTCGAC
>comp765_c0_seq1 len=420 path=[580:0-419]
TGGGAATATAAATAAAATAGCCACTCTTTACAATAGAATAACCATACTTTGTTGTGGTTA
CCATGTTTTGAAGAGTGGTTATTCCAAGGGCAAGTTGGAAAAAATGATGCTTAAAATCAA
GCACCAAAGTGGAATACCGTGCCTGAGTTGGAACCTAAGTATAAGTTTCCCTTTAGTTTT
TCATTATTTTTTTTTGGCTGAAATGGGTCTTAATGGGCTAAAAACATTTCAAAACATCTG
AAAAGCAAAGAAATATTCGTAAGAGGTTTCTAAATTCTGAAAATTGGTTCTGAATTGTTT
AAAACGGACTAAAATATGTTTGGAAACCTATAAATCTGTTAGATTTTGCACTTTGTAGAG
GCTAAGCCTTGACACAACAGTAAGGTTGCCGCCTTGTGATGGTCATGGGTTCTAGTCACG
>comp767_c0_seq1 len=454 path=[1:0-204 713:205-453]
TGTAACTGTTTTATTTAATATCTTTCTGCTTTAAGTTTTGTTCTCCTGCCTTTAACATCA
CCTGACTGCTTGAAGTTAAAGTGGTCTTACTATTTTTTTCCCATTCCCTATTTGCAGATA
TCATATTTTCATTAACATAACAGTGCTAGTGATGTAGTTCAGATGCTGTAACAACATATC
TTCTAGAGACATCTAGGGTGCTAAAATATTTTCTTTTTAAGGTTTGTAATATAAGTTAAA
TTTCGGGTGGATTTGGATGGTGATTTATATAATTGGAAAGATTGAGATTTAGCAGGAAAT
GGTGTGGTTGGATAACGAAAAGCTAGCTGCTAGAATTTCAAAACAGGATTTTTGGGTTTC
TTATAATGGTTAATTGGTTATAGTTAGGGTTATATTTAGACGGGGAATATACCATAGGTT
TTACGGGTTTTATATTGGTGAAAAGATGGGGGTG
>comp769_c0_seq1 len=1223 path=[1:0-582 2582:583-729 725:730-1222]
ATCATCACAGCGAGAGATCTCAGGGCGCTTTAACCTGGTAATGCTGCTCCCAGTTTGCAG
TATCTGCCTAATTACTGAACTGGGCAACTTGGATGTGACATGGACGGGTTGTTAAAATGG
GACTTGTTGATGTTTACTTTATTGGTCACAGAAGTAATCTACAGTTGGGGCAATCATCCA
GATATAAAAGGGACACTGACCTTACTCTATCTCTTCTTCTGTTTGTTGATGTTTGCTTTA
GTGCTTTCTAGTTTTATAAAGCCATTCGGTGGTGAAAATGTGTACAACGTAGTTCTATGC
AAGATGACAAGTTGGATTTAATCATATAAACAGATCCAATAGAGGAATATATTTCACTAA
AGTTCAAGTTCAAGAGTTGCTGGCCTATGTTGAAAAGATCTGCAGACTATTTGCGTGCTA
TTTAATAAGCCAGAATCAGCATAGTGCTAAATGCTGAAATATTTTTGAGAAAACCAGATG
TTGTGTGCATATGAGGACAATAAATATCACCCCCAGGAAAAATAGTTTCAGTAAGTATAG
CAAAAATCATGCGATTGTGGAGTATTCTCATGCATATTTAGTCGCTAATGCTCATTGGTT
GAAAAAATGTAGCAGAAAGAGGAAGAAAGAAAACAATAAATTCTCTTTATTTGGCACTTG
AGGGCTGAATATCATTAATCATAATGTGATTTGTGATTGGTAGTTAAAATTGAGTAAGGA
GACTAAGCAGGGTTGTTGACTTGAAGAGAAAGGTTTTGGAGAGTGTAAAGGATACCATGA
ATTTCTGAGTCTGATGAAATATTTTGCTTGTAACTGCCAATGAAGATTGCTTAAAAGGAT
TTTCTTTTGCTACTATCTTGAACATTACTTTAGAAAATTGAAACAAGACATGTCATGGTA
CCAAATAGAATGGCAGGCTAAACCCAAATGGGACACCTAAAGTAAGTTAGCATGCAAATT
TAACAACCAATTAGCCATATGGTAGATTCAGTGCAAGTACAAGACTGTAATCTTCATTCA
ATAGGACTTAAAATATGTGCTTGCTAGGTAATATGTTCCCACTGGTAGGAAAATGTTTAC
ACTATAGAGGAAATATTTCTGGTCATAAATATAATTAAGTTGTTAGTTTTGCTTTCTTCT
GATATACAGCACAATCACAATGAAGGAAGAAATCAATGCCCACTGCCGAGTATGTCCGGT
TGTTTCTTTCTTTCTTTCTTTTA
>comp773_c0_seq1 len=721 path=[701:0-356 1060:357-720]
GCTGAATAGAATCTGAAATATATATATATTATAGAGTGTCAATTTTTCAATCATTTAAAC
TAGATATTAGTCACAATCCCATAAAGGTAAAGTGCAACATTCAAAATAATCATATAACTA
TAACACCTTATGCATACCACATTGCTTGCCTGGCTTTTGTCCAATATTACCTTCACATTT
ATGCATAATTCAACCATGAACTCATACAACAACCAAAAGAGCAACTCAGTAAATTAAATA
GGAAGGAAGTTTAATAAGACAACCTAATACATTAGAAAGACCAACAAGTCTTGATCTTGA
ACAATAGAACCACATAACGAAGTGTAACTAGATTGTGCAAGTTCACCATTCATCACCTTG
TGTAAGCACAGAACCAATGCAATAAATGGACAAGAAATAGCTAAAGTGGTGGCCAGCACA
CAATAAATTTACCATAATAAAAATGAAGCCTCAAGTGAAAACAAAACCATCAACACTTAA
TAAGCAATTTATTTAAGGATCACAGTCAGACTACTTCAGAGTTGTTGGAGGTCTAGAATA
TTTTCCAGAATATTTCATTTCCCATTTTATCATAATAACCAATGTTGTCTAAAATTTTAC
ACTCAGAAGCTTTTAATCCTCCATTTCTTCATATTTTTCTTCATTTCTTTTCATTTTTCA
TTTTCAAGATAACTTAGTTAACTTCATTCTGTAAATTTATTTCCTCACCTCTTCCTGATG
A
>comp775_c0_seq1 len=453 path=[431:0-181 613:182-452]
TCTTTCCCTCGTGTAAAGTTGGTTGTACACTTCATAGAGGCTTGACAGGGAGCCACAAAT
TTACCTAATAGGATGTTTTCCTGTTGTTTGTCTGGGGAAAGCTTCTGTATTTATCCATTT
ATATTTATTCTTCATGTTAAGATCTTGACAGTGGCCATTTATGAAGGTCATATTTGCCAT
CGAAGAATCACAGAATTAAACATGCAAGTTCTCCCGCTGAAGATGGAAAGCTGATGCACA
GAGATTGGAACTCACAAATGAGTGTCTCATGAAATTTACAATTGAAGTTTAGCTCGATGT
ATATATGTTTCAGTTCAGAAATGTGCTACTGATCTTCATAGTTGGTGTTCTGTATCCTCT
AGAACTTATACGTGTACAGGCTACAGCAGTCTATTAAATTATCATCATTTCTGACTTGTA
AGGCGGGTGAAGGACTGATTATTTTGTTTTGAG
>comp779_c0_seq1 len=684 path=[662:0-683]
CTGAGAGCTCATAATCCTCAGCCAGTGTTTGGGTTTACTGTTTACACCATGTCTTGTTTC
CTGCAAGAAATGACCTTGGTCCTCTTTGTCATAGACCCTCAAGGTCAAGGTGAGGGTTAC
AAAATTCGGAAACAAAAAAGGATCTAGTAAAGGTTATGGCGATATCTCTCCTGAGCTTAT
TCTTCTTATGCTTTTAGTTTATTTATTTTTACTTCATGAAGAATGTTCGAGTTTTCTTGA
CCTTGCAAGTCCAAGAATTCAATAATTTAGGTCAAGATTATTTGTAACATTTTTAAACAA
GCTTACCATGCAAAAATCATGTGGTAGCTATTTGGAAGTTGAATACTTATCCTATCCCTC
TTGAGCTTCATAGTTTCTTTATCCTCTTAATTTGTTTGCTTATCTATCTTTTGTACAACA
CATGTATTCATTGTTTCAAAGCTTTTGTACCATTGATTGTAAGGAATGGCTATATCTTAT
GTCAAATTTGTTTCTCTTGGCAGCTTTAACCCAGATCCCCTAATATTTCCCATTAAGTTC
TCACCTTGATTTTGGTCGAAATGTAATGTATGCTGGAAGAAGGATGGATTACCACCCCTC
ATAGTCTAACTACCTGAACTTTGTTCTTGTTACTGGTTTTTCATTTTACATTGCAAGATA
CGACTCTTGTTAATTAATACCAAG
>comp781_c0_seq1 len=578 path=[556:0-577]
GGAACAACAGCTCTCAGTCTGGTATGCATACACCATTTTACATAAGATAGTTTTGCATAG
TAATTCTCAATCATAAAACATAGTTGAAATACTGGTCTTTCAAGCAATCCTGGTGCGGTC
CACTTGTCATGAATTCAAATTAGCAAATACTTATTGCTGGTCCTGTGTTCACATTTGTGT
GCATTGTATCACTTGAGCCAACTCATCCCCATGCAGTACTCAAGGCCTGTAAATTTTTGT
TGATGTGTCTAAATAAGAGAAATTCTACTTACAGAAATCTTGAAATAATTCAATTATATT
GGTTATGATACACACTTATGCTCTTGGTACATGGCTTAGGGTTATTGGGCTATCTCTATC
CGCTATGTATTGCTTGCATGTAGCATTTGCTCAAGGGAAGACTGTTGTTTCAAGTCCATA
GACCATGTTGATTTTACTTACCTGCTGTTTCAACTCTTGGTTTTAAGTTTTTTGAAATGT
GAAATATGGCCAATGTGGGAGAAAAAGAAAAACATGGTAAACATTCCACTTCATCTTAAA
ATCATGTTGGATGATGCAATACCAGTCATAAACTTGCA
>comp782_c0_seq1 len=1027 path=[1005:0-1026]
GCTCCCATTTCATTCTCTCAACAACAGCCAAGTTTAACCCTACACTTATCTCTCCTCCTT
TACTGTCAGAACTCTTAAACCACAACACTCCATCTGTAACATTTCCTTCTTCCACACCTT
CCTTTCCACCAACCATTACAATTTTTCTTCCAATATCAACATCCACAAACACTTCATTTT
CTTCACCCTTACTGTTTTCCTTAGAGATTATCTTTTCCCATCTTTGCTGGAGTGTCATTT
CATAGAACACTGATGTTTTCATTTGGTCCTTCAATTTCATCTCTTCCTTCACAAACATGA
AAGGAACATACCACTTCCCAATTACCACAAATTCAGAATGATCTTTTGATATTGGCAAAT
CAAGTTCTGGTAATTGGGTGCGCAAGGAAGAGTTGAGGCCCAAAGCCTTCTCCAAATGGT
AATGGTGTGGAGTCTTAGCACTGACTTTCCACCCTTTTCTCCTCAAGAACAAAGGAGGAA
AGCCATCTTGAGCAACGGACTTCGCCGAGAAACCACAACGCTTCCGGGTCATCTCAAATT
GTTGATATACGTTAAAAGGATCCAAAGACTTCGGTTTAACATTTTTGACATAACTGCAGC
ATAAACAAGTTCCCATGTCCTCTTCCAGTGAACCTGTGCTTGCTTCCCCTTGATGCTTGC
CATGCCTTCTTATCACATAGTAGCGATTAGAAGACAGAGGCTGATTTAGAACTGGAATGA
AGACGACCTTATCCTGGAAAACTATGACGCTTTGTCCAGTACTTTGAGTATAAGTGACAG
TTAGATCCTTGTTCTGAGGAAAAGGAAGGTGACTGATGCTGTTGTTCTTGCACAGACCAA
AACAACAATAAGTCTCAGCTTCTTCATCTTGGATCACCAGATAACCTGAATTTGGATCCT
CTGGTGGGAGAGATAGAGCAGTAGGGTCCTCTTTGTATATAGAGCGAGGCCTTGTTACAT
ACATTTTCTCTCTGTTTGTCTAGCTTCAAGCTTTCCACCCTCTACGGTAATGTTTATATG
GTTTTTG
>comp782_c1_seq1 len=473 path=[2009:0-472]
GAATGAAATGGGAGCAAGAAAGAGGAGGTTGGGTGGATGGGAAAGAAAGGCAAGTGAGGT
TGGAAAGAGTAGAGAAGTTTGAGGGAACTGAGAGATGGAAAAGTTTTGGGTGCTATGTGC
TTGTGGAAAGATTTGCACTGAATAGAATGGATGGAAGCTTTGTGCTAACTTATGATTTCA
GGCACACACATCAAATTAGGTGTAAATGGGAATGACCATTTTTCCATTGAGATTGCCTGC
CATGCATATTGTTTTGATACAGTATCTGGAACATAATGAAAGCTGCCAGAGTGTGATATA
AATATATTGTAGTATGAGGATCCATTTCACCACGGTAGTGTATGTATATCCAAATTGCTA
AAAGTGCATCCACTGTATTTGTCTATATGTTTGCGTTTGTGTGTGTAAAATATATAGTGT
GAAGATGTAGTTCTCTTTTAATCAATTTCAGAGAAGTAAATTATGTAAATCCG
>comp784_c0_seq1 len=495 path=[1:0-188 190:189-494]
TGATCCCCTTATCGTTGTCAAAGGAGGTGGAAAATTCTTGGTTTTTGCATTCTTAGCTAC
CAAAAGTTGACGTGATTTTGTGTGCCCCCTGGTCCCCAAATTCCCGCCAGCACAGTCCGA
TGAAGAGAGCAAGTCAATGCCATTCTCTATAATGTCTGTGCCTGTCTCATTCCCTAAATT
CTCAGTGCGTAGTTCCAAACTCTTCGGGCTAAGTCGCAGCGATGATTGCTTCGCTTGAGG
ATGGACATAGGTAGTTTCTTCATCTAATGGTTCTTTGGGGCCTTGAGAGACATTGGAAAG
AGCTTGAATGAAGCTCCATCCACCCTGGTTGGGGTTCGAGGAAATGGGGTTGTCGTGGAA
GGTGTCAGTTTTGTTGCTGTTTTCCTCAAAATGGGTTTTGGTATTTGAATCCCAGAAACA
TGATTTGAAAGTTAAATCAATGGGTTGAGGGGTGAGTGGTTTTGAGGAAGGCAACCTAAG
CCTATGTATTCTTGA
>comp785_c0_seq1 len=544 path=[1:0-299 301:300-302 304:303-543]
GAAGCACTTCATGATCAGGCGTTGTAAGTAAGATGCAACAGCATTTCGACGTTCTTCTGA
TGGTTTGTTGGGCTGAATATGTGCAAGCAGCTCTGCAGTTCTCTCTTCGGCTAGTAACCA
TCTGTCTTGATCAAGCACTTGAGTAACGGAGGTTGCTTTATTAGGCAAGAGACCATTTGG
AATAAAGCCACTCAGCATGGCTCGTCCTTCAGGACAACCCATGCAAAGATTATCCCTTCG
TAATAATGTTCAGTCTTCAGCACGTCCCTCTACAGTGTCTGCTGCAAAAAGAACTGATCA
GATAGAATTGGGATGCTCAGTGAACTTAATCAACCTTGCATGCCACTGCCATTGAGGCTT
AAGATTTTATAGCCCTGTGACGTAAGAGACTAAAGGGTAGTTTTTTTTCATATATATTCT
GGAAGATCACAACAATGGAAAATGCCAAAATGGTTTTGTTTAAAACACAGAGTGGGAGTC
AGAGAGAGAGAGGAAGACAGAAACTCAGACAGGAAGAGAGAGAGAGGTTGAGGCTGTTTT
TTTT
>comp794_c0_seq1 len=434 path=[1:0-433]
AGGGCTACCAACTCCTATTCTAACAAAATACTCTCCACTCCCTTCCTCCATACCCGATAC
CACATCCGACCCGAAACCCTCTTCCTCTGCCTCTGCTTCTGCTTCGTAACTAGAACTCTC
ACTCTCATTGCCATTCAATTTAAGGCGGCGAATGAGGGTGGAGACCCTTTTGACATCTCT
TTTCATTCGTGCGTTGAAACGGCTGTGATGATCATGGAAGGTACTAGTACTACTGAGTTT
ATCTCTGTGGACTAACTTCACTTTCCATTTTTCACCCTCACTCTCTGGTTCTTTGGGTAT
TTGATTTTGGGTGGTAGGCTTGAGTTTCGTCCCTGCCATTGTTTCTTCTACGTTGAACTG
CTCGTAATGGGAAGGGGAGGTTGCAGAGGAAGTGGAGGTGGTTAGAAGGATCAACAGAAG
CACTGTGGCTGTGG
>comp795_c0_seq2 len=412 path=[1:0-63 1386:64-411]
ATAGTGATATAGTATCAAAATACAAGGGTATTTCCGTCAATACACATACAAACGAGTTTT
CTTTCACTACAAAAGCAATAAAATGTTGCTTTTGCCTAAACCACGTTTGGAATGAAAATC
TCGTTCATTTTTTTCAACTGGGATTTCTCCCAAACATGTCAACAAGAGCTTGAAAGGGTG
GGCATTTAACACACCTTTAGAAAATTTTCCTGCAAGCTATCCAATTTGAAAAATCCAAAT
TGAGGCTTAAACCCTGCTAAAGAAGCCTTGCTGTTTTTTATTTGTGAGTTCACATTAATA
CACTCACTTAGGCTTTTTTTTCCATTTCACATATCTGTGCTTTTAGGAATAGAGTTGAGA
CCATGATCAATTGGTCAGAGAACATTACCTTGAAGCTACACGAACATTATAT
>comp803_c0_seq1 len=429 path=[1:0-428]
GGGGGGGGAGGTTAACAAATAAAAAGGGAGAAAGGTGGAAAAGTTACAGCACGCATAAGA
TCAATGGAATTATAATCTTAGTCATTCATGCTCGATAATTTGTTGCTTGCATAAGCAACT
AGAAAGAAGATAAAGAAAAAGCTCCTTCTTTCAGCCAAACAATAGGTGGAAGAGTGACCA
AAACAGAGGTTCAAGAGAACCCCTCTGCCCCCCCAAATAGACATCATGAGCTGACACCCA
CTAGGAAGCCAAAAGGGAAAGTCTATTCCATAAAAGATTTGATGGAAGAAATATCTGACG
AAAAACTATAGCATTATGCTCCAACCATGAAACCAAAAACTCCGCAAAAATGGAAAAATA
ATTACCAAACTCTAATTGAGGAAAAAGAATAATGAGGAGCGCGAACCTGGTAATAACATG
CTTCAAAAT
>comp804_c0_seq1 len=333 path=[311:0-225 537:226-249 561:250-252 564:253-332]
TAGAAGAAAGAAAATATTTTCAGGCATGTAACCAGCTCAGAAATCGCTTTTGCTTTGTCT
TTCACAAGTTATTTGTATGCTTCTGATGGCTGATATTTGCAAAATATTCCAGTCTGCTGA
TGTTTGCGAAAGAAGTGTCATATATAAAAAATATATCAGTTTTACTTATGATTATTCTAA
TGGATTCTAATGGATAACACTAGCCTTCTTCACTGTCATTGTGGTTAGATGTATATGTCA
TGCCAAGGTCACAGAATCACTGACTGGTGGAGAGGGTAAGAAAGAAATATAATTGGTGGT
TAACGTAATAGGGCGAAATGCAACAACTACAGG
>comp807_c0_seq1 len=428 path=[1:0-427]
GAGCAACCCCACCTCCTGCTGACATGCCGACCCATACAGCCCCTGGGCCCGCCCCACCAG
CTTCGACTTCGGGTCGGGCGTCTCAGTCAACGGGTCATCCGCCATCATGATGGCTCCGAA
GAGGGTGGGGGATGATTTGTATGTGTCCGCAGGTTGAGCCACCCGAACAGCACTTGGGTT
TTTGCCACTGAGGGTGTCATGGAAGTAGAACTGCAGGTTCGTCACCGTCTCCTTCTCGGC
TTCAACACTTGCTCCCCAATTCTCTGCTTTGAATTTCAAGCTTTGAGTCCATGGCATCGC
TGCCATTGCACTTATTATAACCATCACGATCACACTTTGCTTTGACATCTTTGATCTTTG
TCTTACTCTGATCACTTTACCTCTCGGAGACACACTTATCAGGCAATTAATTAAGCTGCA
GGGACAGG
>comp809_c0_seq1 len=407 path=[1:0-406]
GGGGCTTTATCCTCAGGTACACCTGTCGTTGTACACATGATAAGCAGAATTCACTCATCC
ACACAAAGTTGTCTAAAGTAGTTCTTGTAGTACATTTTTATGTTTTCTTCAAAACTCAAA
TAATTTCAATGCTGCACCATGCTGCAAATGAGGCCAAAGAATTATTGTTATAATGCTATC
ATCCACTTACAAAGTTGGCTGAAGTTGTTCCTTGTTCAGAGCATAAAAATTTATAATGCT
AGGCTACGCCAATTTTTTTTATTTGATTTTTTTATTTCAATGGATTCATAAACCATGAAG
GATTTTTTTTTTTTTCCATAACTTAAGCTTGCTTTCTTTCCTTCTAGAATATAAACAAAA
TTCTGTAAACACAGAAAAGAAGGTTGCTGAATTGTGAAAACATAATT
>comp820_c0_seq1 len=641 path=[9:0-285 295:286-287 297:288-640]
TCAGAGAATTGAAGGTCCTCACTTTCTTTTCATCTCTCTAGTTTTCAATAACCTGTATTG
TCCATACTATTGACTCACTTTGCTCTCACTATACTTATTCTTGTGTACATTATCTTAGAT
TTGCCTTGTTTTCTTGAGGAGTAAATTTACGAAAGAGGAAAGATTGGGTAAATTTCTCCT
AGATAGAAGTCATAATATAGTACATTTTATAATATAAGAAACAATACTCAAATTGAGTGT
AGTAACACTACTTAATCACATTAAAAGGGTTTCCTTTCAATAGTTAGGGGAGTCAATGCA
AGAAAGAAAACAAAAACTAGTTTGCCTATTCAGTGCTGATTTGCTCCATCAAATCCTCAA
TGGGAAAATTCAGGCTTTTAGTTGGTATTTGGAACTTGCAACAGTACTTTTACAAAATGC
CTTAGTTTGATATTGCTGTACAATATGGGTAATATGAAGAAATTCATAAAATGCTGAAGA
TCTTGTCAGATAAAAGGTATAACAATAACAATTAAGGTCTGAGTAATTTACCACATGGAA
GAAAGTATCACTTTGGAGTGCTCTTAAAAGTGGCCATGTGGGATACATATATTTGTACTT
CCTAGAAGGTGGATATAAGATTTTGGCGTTGGTCTTCTAAT
>comp822_c0_seq1 len=564 path=[1:0-563]
ATTCAAGTACACAGCCTTGCTTTCTTTATGGGGAGTTAGGAAGACTCAGAAAGTCACTAG
TTCTACAACAGTAATTCACAGATACCATTAGGATAACAAGTGGAGCATAGTTTTGAGCCT
TTAATAGCACTAGCTAGGGAAGTAGTTATTTGTGGCATGAGCGGCAACCACAAAAGTCTA
GTCCCCAACATCAACGTACGTACGTATATATATATATATTGTTATTACAAATGATAACAT
AAGTAGAACAATTTCCCCAACCACATGTATCGATGGCAACATACAGTGCAAAGCAAATGA
AAATAGTATGAATAAGAACAAAAAATGGTATTATCTAAGCAGCCAAAACCTTCAGGCCCT
CTGCCATTAAAAAAGAGAAAAACAGATGAGCTGCAAATGCCAACCCCACTCCTCCACCAG
CGGGGGAAGAGGTAGGGTGTTATAGGTCTGCAATAAAAAACAGCTAAGGCAGCGTAGTCA
ACATGCTACAACCAAAAAGTAAAAAGTAAAAGAGGCAAATAATATTATCAAGACACAGTC
ACCATACCATCTGGCCTTGTTTGG
>comp823_c0_seq1 len=335 path=[469:0-100 24:101-334]
AGAAGGAAAACAAGGCATTGAGAATAGACAAGAAGGACAACTTTCTCCATTTTTGCGATG
ATCGGATCTGAATCACTTTCTCTGGTATACTGATTGTTGGGCTGTGCTATTGCTATGCAT
AGAAACTGAGAACTGAATTCAAGTTCTCCATGAGATCTCACTTTCCAGCTGAGATCATTC
AAGTACGGATAACATGCTAGAAACTTGGTTGAAAGTTGAAACTTGAAAGTGAAGAGTTGC
TCGTTGAAAACATGAGCAAGACAGAGAGCGCTCATCAAAGTCTTTCAATGTTCTCATAAA
CGAAAGAAAGTCTTTGAATCAGAAAAATAGTGCAG
>comp825_c0_seq1 len=669 path=[1:0-668]
CGTCACATCCCTTTGCCTGATTGTAGCAGTCTATAAGCGTTGTTCCATAATAATCAACAC
ATTGATGGACCTCTGAAAGATAAAGATTGCCACTTCTGTCAGCCTCACAGACTATGTCCA
CATTGACCCCGAGAGTTTTCCTGAAAGCTTGCAGTATCCTACGAGGTGGATACTGAATTC
CGTTGGGAAAAATACCTGCATTTCTCAAGATTTTCTTCAGATCACGACTCTTTCTGCTGT
TGAGTGCGTACACAAGATAATCATCTGGCCTCATTGTTGCATCAAAGCACGATCCATACC
TTTTCCATTGGTCTTTCCACAAAGCCTTGCTCACTTGAAAATTATCAGTTGTTAGATCAG
GCCAGAACTTGAGCAGGTCGTCTTTGTATGCCTCGATAGTGCTATTTGGTAGAGTAAATG
GTGTGGGACAATTTTCCAGATCAGGCCCTCCACGCTTCCTGGGACGAAGGTAGCCAATAG
TAAAATGTTGGGGCACTAAGTCCCTGCAAGCGCCTTCGTGTGTCAAGCAATAGGAATTTG
GCCACCTCAAGGCTAGTTCTAAATAATCATAGGTGTAGATATACTGTGCTCCACAGTACA
GAATTCCCAACAGCAGCAAAAACAAAAGTAACTTGCTCTTCATCTTGTTTTTGGCCTTGG
TAATTTTAG
>comp826_c0_seq1 len=365 path=[115:0-296 70:297-364]
AGAAAAGAAAATACAGATAGCCCAAACAATTCAAGAGGTCTGGACTCTCCCTTCCTTTCC
CTCTCTTCTTTCTTACCCCCTCCCCCTTCTCTCTTTCTCTCCCTTTCCTCCCCTTTTATC
TCTTCTCATGCTAACTGCTTCTTTCCCTGCATTTCCCCCAATCCCTGCCACGTCTGCAAG
TGGTTATTTCCCCTCACATTGTCAGCATGACTCGTAGGGTCCCAATCCCCTACATCCTCT
TCTTTTCTTCCTAAGGTACACCGTAGTGTTTGGAGGCTTCCTAACACAAACCTTGGTAGA
ACCACACCCAAAAAGCTAGCTATTAAGGTGGGATATCCTAATGCCATATAAACCCCACAT
CTGAA
>comp827_c0_seq1 len=697 path=[675:0-446 1122:447-471 1147:472-696]
CACAAATGAGAAGATTGGAACTGGCTAGCGATGACTGCGCCTGATTATTACCATAAAAAA
GGTTCAGTCAACTACTCCCTTTAATAGGTCCCACCCCGAAAAAGCCCTTCACCGTCCATT
TTGCCCTTCCATGCTCCTCGTTAAAATGTAAAGGCCCTGCCTTGGCTTGCTCGTTGGAGA
TGCCAAACCAATCTTTTTAGCCCCTTCCCTTTATTTGGGTATAAACACTTCAAGGTACTT
CATCATCAATAGAGTTGAAGCCTTGAACGTGAACCCTTCTGTCAACTCAAGAATGAGGCT
CTCTATTTTACTTCTAGTGGTCCTCATGGTGCTGGCTGTGACAAGGCCAAGGCTTGTAAA
TTGCAGAGTCCTTCCATCACCAATAAAGACAGAGAAGGCCACTCATGACCCTTCCAAAGA
GCTTAAATTTCCGAGGACTTCAGCAACGCAAGAGAAGGCCAACACTGCGGATGATATGAG
CAGCAGGATTTTAATTGGGAACCAAGTCCACACAATGGCTTCGGGGCCAAGCAGAAGAGG
TTCAGGTCACTAACACAATGTTTCAGTTATTGACTCTCTTATTGGTTTTTTGTTACTGGT
TTACATTTGGATTCATATAATAGAGCAGCTTTGTACATGAACTATGGAAAGTGTATCTTT
TGTCTATAAGGTATTTAGGTGTTGATATTTTTAGCAG
>comp828_c0_seq1 len=900 path=[862:0-860 1741:861-899]
AGGCAGTGTGTTTATCAAGCTTTCGCAAACCAATCTAACGTTGATGCCCAATATCTTGAT
CCAATTTTCTCTGTATTTCTGTCATTCTGATCTCCAGAGAGGAAATGGCATCAGGGAAAG
AAGAAAAGAAAGAAGAGAAGGGCAAAGACAAAATCGAAGGGAAGGAAGAAAAGAAGGAAG
ACAACAGTGAAGTGATCACTGCTATTTACAGAGTTAACCTGCATTGTAAGGAATGTGGGA
GCAAGATCAAGAAGCATCTCATGATTACCCAAGGAGTACAGAATGTGGACATAGATATTG
AGAAAGGGGAAATCAAGGCAAAAGGGAAATTAGACCCTTTAAAAGTCTTGAATCTTATAG
AGAAGAAGAGCAAGAAAAAAGTTGAATTAATATCACCAAAAGTCAAGCCTAAGGAGAGTA
CTACTACGGAAAAAAAGCCAAAGGAGATCAAAGATCCTATTATCCGCACAATCTCGGTGA
AGGTTCACATGCATTGTGACAAATGTGAGGCTGATCTACAAAATAGATTACTGAAGCACA
AAGGTATTTTCAGTGTTAAAACAGACAGGAAAGCTCAAACTGTAACAGTTGAAGGTACCA
TTGAAGTAGAGAAACTGATATCGTTTTTGAGAAAAAGAGTGAATAAAAATGCGGTGGTTA
TTTCCATAAAGGAAGAGAAAAAGGAGGAAAAGAAAGAAAAGGGCAGAGAGGAAGGAAAGT
CCTCAGAAACTACCAAAGAGAAGGATGGGGGTAAGTCTGGTGAATCAACCAAGAAGAAAG
AAGATACCAAGTCTGGTGATTCAACCAAAGAGAAAGGAGAAGGCAAGTCTGGTGAAACAA
CCAGGGAAAAGGGAGATGGCAAGTCTGGTGAAACAACCAAGGAAAAAGGAGATGGCAAGT
>comp830_c0_seq1 len=1152 path=[1130:0-79 1210:80-1151]
GAAAGACCTCTCAGTCCAAGCTCATTCCTCTGAAACTCAAGGAGTCGAGATATGGAGGAA
TATTCCGCCATGGACGTAGATCATCGCCAAGAAGAAGAACAAGAGGAAGATCCTTTCCTC
AAATTCATCGATTACGCAAGATCCGAGCTATTGCAGGAAGACGATCCAAATGGAGATGGT
GCGGGTAACACTGGACCTGGTTGGACCTGGATCGTATCTCGGATTCTCAAGACTTGCATT
GCTTATTCAAGCGGTGTCACACCTGCAATCTTGCTCTCTGAACTCTCTCAGGCATGGAGT
GAGCAACGAAGGGTTGGGGCTCCGAAGAAGAGTCTTGAATTAATTAAACATCTCAAGAAG
AATCATCGGAGGACAAAACTTCCAAACACTGTTACAATTGATTCGATATATGAGAAAAAT
TTCCTATCCTTGAACAGTGTTCTGGAAGCTGTTATTATTGATGCATTTGTACTCCCAGGC
ACAAACATCCACATGCTTACATTAGGGGATTATTGGAGCTCCAATATCATAGATCTCTAT
CTACACCACAGATTCTATGACTTGGCAGGCCCGCAGAATGGAATTCTGAAGAGAGGGAGG
GAGGTTTTCCTCACTGGATGCTATCTCCGAACTGCCGCTGAAGGTTCTGGTTTTCCACGT
CTCTTGCCAACTGAGTATCTTGTGATTCTATTGGATGAGAATCAGGATGATGATGCAATG
CTACTAGGAGCTCAGTTTTGTTCAGACTCTTTCTCTTCAATTTCTCTTGATGCAGTGAAC
AAAGGGGCTTCTTATTCACTTTATGCCAGGATTGAAAGCATTGGATCTGCGGAAATTCAA
GGGAAGTTTGGAAGCTTACAGAGGAAACAGATTACTCTTGTTGATGGTGATGGTGTCACA
TTGAAGTTTTTCTTGTGGGGTGAGCAGACTCTCCTTGCCAATCTTTTCAGAGTGGGAAGC
ATGCTTGCACTGGACAAACCATATATTGCAAGTTCTGTAGAGTTTGATATTGAAACGAGT
GAGGAATTTTTTCTTGAATATGGAAGTGCAACGCAATTATATTTGGTGCCTTACATTCAA
CATGAAGAACAGGTGATTTATGGATTTTTGTGTGACATGGACTATTGTCATGTGGATAAA
ATATTAAGTAAC
>comp832_c0_seq1 len=557 path=[535:0-556]
AAGACCCAAACCCCCTTCCTTCTTGGGACGACAACACATCCCAACTCATGAGATGATCAA
GTCTCGACACTGTAATGCTAGACCAAAGGAAATCTCTCATGATCTTCTCAATTGTGTGAG
CAACTCCCACAGGTATATGGAACAAAGATAAATAATAGAGAGGAATACTGGAAATACAAG
ACTGAATAAGAGTGATCCAACCTCCAAGAGAGAAAAATGCCCCTTTCCAATTATCTTAAT
GCTTAGAGATCTTCTTAACACCAGGATCCTAGAAAGAAACAGCTCTAGAATTACCACCTA
GGGGGACACCTAAATGAACAAGAAGTCAATCTAAGACCTGACAACCTGCCAACGAAGCTA
AAGAATAAAGAATTTGAGAATTCACATTGATACTGGCTAAACCACTTTTAGACATATTAA
TTTTCAATCCAGATCACAACTCAAAAAGTGAAGTAGAAAAAGGGCATTTGTGAAACTTTC
TCTATCCTCTTCTAAAAACAAAATGCTATCATCTGCAAACTCTAAGTCTTTGATTGTTTT
GAGAGAAATGGAGAAGA
>comp834_c0_seq1 len=2195 path=[1:0-2194]
CGGTGAAAAAAACTAACATATTGATAGCCCTAAGCACTTAAAATGAACCTAAGTACCAAA
GGCTAAATAAAAATCGTAATTATCAAAGTATAAAATAACTTTTTTCCAAGTATAGAGAGA
AGAATGTACAAAAACGGCTTCGTTGTCACACACCTTCGTGTATGGAATCCAGCAATGCTT
AAGCCACTCAGTTCTCGACAAGGCATACTGTACCTAATTAGTCATTGAATCAGAACCTCC
AAAAAATTTGTGATAGCAAACAAAAAAAAATCAACCACGAAATAATAAATCTTCCGATAT
AAATAAAAATTGATTATATATATTTTTTTAAACCAAAAATAAATGTGGAACATGGACGAA
TAAAAATTAATCATAAACCCTAGGCGCACTCGCGAAAAGGGACTTAGGCTAACAGAAATG
TGCTAGGAAATCGGAGGATTTCCATTGAGAGTGGGCCCTGGGCTTGTCATACGATATTAG
GTTAGGTACTTACATCTCAGCGACAGGGGAGTAAAAACAGAATATCAGGAGATACGACCG
CAAAAGTCACCAACGAAACGCCCTGCCAAAATTACCGTTATTTTAATGAAACTGTTTATA
GGTAGATACATTTTACTTCCCTTCTTAATTTTTCCAAAAAAGCATTTTTTTTATAAGAAC
AATATACATGTACACCTCTTAACAGTACTGTGATACTACTATATAAACACTACTTTTTTT
TGTTATGCAGAGAGAAAAAACATTCAATTTATTATTCAAATCAACGAGAAAAAAGGATTT
TTGAACAAAGAACGGGGTCAACTTAACTGGGCAAAATAATTTATACAGTCCACTCAAGCG
CAATATATTTTTCATGTGTTCGAACATTCATAACATATAAAATATCAATCAAAGAGACAA
TCTCCGAGGAATGTTTTAGTTCGTACTTCTTCTCAATAATTTTGATGCAAAACCGTAACG
AAACGAATTTTTCACCTCATTCACAACTCGATGGAGAATAAGTAGCCTTTTGATTATTAA
ATTTACGATCAAAAACTCATATAAATAATATAAATTCCTTTATTGTAAACGCAAAACTGC
ACAATTATTGTTTATTAAAAATCCTTTTTTTTAACTTCTCAGTTTTTTATGAATAGCTGG
AAAAGTTTTTTTTTTATACAAAGAGATAAATAAAGGGGATTTTTCGGGGAAAAGGAGGCG
AGGGAAGGGGGAGAGGGAACCTTAGTTTTGACCGCTCGGTTGAAAAGTGGAAGGGATCCC
GTAGGGCACAAAAACCCTCCAATGATTCGTGTCTTCCGTGTATTAAAAAAACAAACAAAA
AACCAATCGTGCGCCATGAATATTTCAGATGTTGTTCGGAGGGCGCCACCAAGATGTCTT
TCCAAACTTTTTTTTTGAGTTTTGTAAATTTTTTTTATCAATGTCGCAGATTAAATTGAA
AAAAAGAGTGTTTTTTGAATTTTGTAGAATTTTTTTGTTGTTTTTTCAAGTTTTTTTTGT
TGTTGTTTTTTTATTTTGTTTAGCGGTTACTTGACTGTCGCTCGGTATTAGCGGTTGGCG
TTTTTCAACTGGTTTGATAGCCAGTCGAGTCCCTCGTAGAGGCCGTCTCCGCTGGTCGCG
CACGTGGCTTGGATGTACCAGTTGCGGTTGCGGAGGGAGTGGAGGCCGAGTTTGTCTGTA
ATCTCCGCGGCATTCATTGCGTTTGGCAGATCCTGTTTGTTGGCAAAAATTAGCAATACG
GCGTCTCTCAATTCATCTTCGGCTAACATCCTCATCAGCTCTTCACGGGCTTCCCCAATT
CGCTCTCGATCATTGCTGTCGACTACGAAGATAAGTCCCTGAGTGTTCTGGAAATAATGC
CGCCACAAAGGTCGGATTTTGTCTTGACCGCCAACATCCCATACGGTAAAACTGATGTTC
TTATATTCGACAGTCTCAACGTTGAATCCGATAGTGGGAATGGTTGTGACTATTTCTCCT
AACTTCAATTTGTAGAGTATTGTGGTTTTACCAGCTGCATCGAGCCCGACCATCAATATT
CTCATTTCCTTCTTGCCGAAAAGGCCTTTGAACAAGTTCGCGAACATATTCCCCATCTTG
GATGGTTATTATTCTAACAACTTTAATTTAAAGAAGTAAATTTACACAACAATAAATAAA
GACAGTCAAGCAGGTCCTATGACCCAATATGGCGG
>comp839_c0_seq1 len=765 path=[1:0-764]
GTAAGGCCTACGAATGAAATAAGAATTACCCTTTTTACCAACACTAATAACATTATAATC
AAGAAGACTAAGATCCTTCAACTCAACAATTCTGGCCTCGGCTTTCTTTAGGATTGAATT
ATTGAAAGACCTCGATCTCCAGTGCAAACAAACAGGGCAACCTTCTTTACAGGCCTAACT
TTGGTGGGGGGGACGTCAATATCTTCAGTTTGGAGCTTCTCGTTGATGTTATATAAGACT
TCAACAAGTGTCTCCGAAAGGGTCAGCCATTGCCCATTAACAACAGCTTCTTGAGCTCTT
CTAACTTTTGCAGCAGCGACAAGCTTCATTGCCTCTGTAATTTTCTGGGTGTTCTTTACA
GAATCAACACGGTCTCTGAGCTCTCGGAGATCACACTGCATTGTGGTGACAGAGGATCGT
GAGAGGCTGCTGCAAGCAGACGAGTTTTGGGAAGAAAGCTGAAAAGGGTTGAAGACGGAG
CGGAAGGAGAGAGAAGAGGTGTCAGATAAAGAAGGTTGGGAGCACACCCACAGTGTGAGA
TTGGAGGAAGACATTGCTGCAATGGAGTTTTGGGGTCTACAGTAAGTAAGTAGATTACGG
CAGATAAGAAGCTAGGGAGGAGAGGAGAAAGAGGGTCAGGTATGTCGTATGTGGTTTGGT
TGTTTTGTTTGCAAGGTATTATTCTCATGCCATGTCATGTGTTGGGTTGGGAACTTGAGA
TTTACTTTTGCCATGCAATGCAAGTAACAAGTGTGGGAATGAGTG
>comp840_c0_seq1 len=1542 path=[2137:0-516 1135:517-1541]
GGATGTTCACTGAGTATGGGTTCTAAAGAAAACAAATTCACATATAAATAAACTCATTAT
CCAAAATGAAGATGCAACATAGCTAATGAACTACGGCTACACAACATAAATATGAGCATA
TAAAAATCAAAATGACTCCTGCAGTAAATGTAACCTCTTAAGGTTTAACTGAGGTTCCTT
AGTTAAACCTAAATAGTGTAATGATATGGTCAATAGCCTCCCCCTTTCTCCTAAACATGC
ACCACAACCCTACCTCAGACATGAAGTCTTTCTTTAACTTTTTACCGCTGGTACCTTTAT
GGATCCATATCAGGATAGGTCCGGGTGTCGGGTTGTCTGTGATGGGTGGATATGTCTTTC
TGTGTACATGACTGGAATTTGACAAGTGATACACACACACACACACCCACATATATATTG
TTTTTCCTCTTTTACGGATAATAAAGATTCCAGCACTGACAGCAAAATGAAACAAAAGAA
AGAAAAGGGACACCTATTCTAAGAATTTTTATAAAATCAGCTACATAAATATAATAACCT
ATAAGCCACGGTATACAAATTGAGGCCACTGAAGCAGGAATTATTTGAATATCACCACTC
ATTTCAGCCACTTATCAAATGAGCAAAATCATTCCCCTACAGTATAAGCATGCTAACTTG
CTAAGGACATGACAATCTAGAAAGCACTTTACAAATGCCAGAACAGAGCAACAGAAGAAA
GCGGAGAAGCACATTTTCCCTGAACCAAAATGTAGGTTCTATATACAGGGGTTCATTTAT
GGTTCATTTGAAATGACAAATGTGCATTCATTCACTTGGGTTGCAAGCCCAAACACAAAT
GACTAAAAGATGTACTAGCTAACAAGCTAAATCTTCTTCTCACCTAGACTGAAATATAGC
ACTGGCACGAAACATCACAACTGAGGAAGCATTATTATCTTCTCGCCATGAAGAAGGAGC
ATTCATCATAGTCATTTTTTATGAACTTGATAATAAGTGAAATAAGAATCTAACCTACAA
TTATAATATAATTGTTCTTTTGGATTTCCTTATTGACATAAACAAATCTGTCCGCAAATG
TACAAAGAAATTTTAAATCGCCATAAATCACCAGGAGGACCATCAAAACTCAAATATTAA
TCTCTTGCAATAGATCAAACCATGACAAGAGTGTCTGCAAATTTGCCTTGGTCTTTCCAC
AATAGTCCTGCACTGCATACACAAAAAATGCCTATGCAAGACCAAACTAATAGAAATGGT
GGCAAGATGGCACCGAATGTGAGTGCCAGCAAGTGCATACCCTATTAAAAAAAGCATATA
GGTAGGTAATAACAAATCCATATGTCATGCTTAACCTACTATCTCTCGAGTCAAGTCCAA
AGTTGACATCTTCAAAATAAATTTCACTTGTCCAAAACTGAACAAAATTTCAACTAAAAG
CCGATTTCAACACTAAATTTCACAGAAATTAAAATAAAATAAAAAAACAAGAAATAGGGA
AAGGGAAGCCATACATACCTTGCGCAAAGCAGTGGCGAGCTC
>comp841_c0_seq1 len=878 path=[1:0-877]
CTGTATTTAAACATGCACAATTTTTCAAGATTCTTACCGGTCATATATATCAGCCATTCA
CACCCTAAAACGCCTTTGTCTTTGCAGCACAAGACCATCCAAAGTTCCAAAACAGTCCAA
ACCCTCAAATTCCTAGGCACCTTCCCTCATTCTTCTGCTGTTTTTCACACCATAACCATC
ATTACCTGACCATCCAAAAAGTCACCGTCCAACCTTATATACTTGTATATAACGCAGGTT
GCTGCCAACAACAATCCCTGACTAGCATCCCCCAAAACATGGGCCATATGCGCTACAACA
GAGTTAGCAGTAGCAGGGGATCAGGCAGCAGTCATGGAAGCTGCAGAGGATTTAGATTGA
ACCCCAGAAGGCTTTACGTTCTCAGGCTACGCAAGAGGTTCACCTTCTTTCTCAGGCTCT
TTGATAGGTGGAAATTGTCATATGGTGAGGCTCTTCAACTGTTGAAGAAAGTGTTTCACA
TAAAAGGTGGCCTCAGAAGAAACCACAGCAACAGCAGCAGCAGCAGGAGTTTAGTGAGGG
AGGAACAAACCAAGGGCCTAGCTGATTGTAGGATGAGATCTTATGGGAGGTCCAATTCTT
TCTATGCAGAAGCCATTGCAGACTGCTTGGAGTTCATCAAACGAACATCTATATCTTCTA
TGGACCAAATTCAAGACCCAATTAGCCATATTCAAGACAGAAACTCATGACTGCTTTTTT
TCGGTAGACAGGATATTATCATATTTTTGTTTTTTGTTTTTGGTTTTTTAGGATTGCTTG
AGAACATATAGTGATTCCTCTTTCTGTGTATATTTCATCCTTAAGTTTTGCATTGGTAAT
GGGTCATTCTCTGTAAACATGTTTGAGAAATGTCAAAG
>comp842_c0_seq1 len=371 path=[1:0-236 238:237-370]
GGCCTTGAAGCTGGTATATGGAAGGTACCCATTTATTTCTTTCATCTATTTTGGTTTATG
TGGTTGCTGAAAATTTCCAATTTCATTAATCATAGGATTCTTATTTCGGGTGATTTCATG
TTTATATACAATTGCTAGTTAGTGGTCTTTGCTTAAATGCAAGGTGTATATAGTTTCCAA
CTCTAGAAATCTGTTGAAAAAAAGAAAGCACAATTTGGATTGAGCTTGGAGCAGTCAAAG
GTATATTCGAAATGATTGGTTGTGGCCGTTGTGCTTGAATTTATATCTTCAAGGAATGTT
CGGTAATCAGTACCTTTCTATCTAAAAAATAAAATTATGGTCTTTTGCAGATTTTCAGCT
CAAAGGAGGAA
>comp850_c0_seq1 len=672 path=[771:0-276 14:277-671]
AAACTAAATAATGAAAACTAAATTCCGAAATTCAAATGAATAATTAAAATGAATTCATTC
TATAAGACAAAAAGATAGATTCGAATAGAATAAATAGAGAGATAGTATATAAGCGGGTAG
CGGGAATCGAACCCGCATCGTTAGCTTGGAAGGCTAGGGGTTATAGTCGACGTTGATTCA
TCATTTTTTTTTAACGTCTCTAATTCAAAACCGAACGTGAAACTTTGGTTTCATTCGGCT
CCTTTATGGAAGAAATTAAGAGATGGAATACACGAACAAAAAAAAAAAAATGGACCAATA
ACATCTATGTCAGCCTTTCTGTATGAATGCATTTAAAACACCTTGCTTTTTAGATGATCC
CTATAGAAGAGGAGGATTATAACAATCTGTTTTTTTCTAGTTACTTCGTTCTCTATTTCT
ATTTGAGAGAATCCTTAGGGAAAGAATTTTATTTCCATCGAGCTAAAATAAATATGTCGA
TGTCTATAGTAAACTAAAGTAATCGTTAAATAGCTATTTTGCTTCAATCTCTCCTATATA
AAACAAATAAAAAAAATTGAAGATTTAGTTACGAGTATAAATAAACTTTATATATCTTTC
TCCATGGATCCTTTACTCATACTCAAAAAATCGGGAGTATTGATCCAATTAGAAAAACTT
ATGTTTCATAAT
>comp854_c0_seq1 len=384 path=[362:0-383]
TACATAGACTATTGGATCTTTTCGTCATCATCAGGTAAGTGACATGAAAGAAGCAGAAAC
TGTTAGACTAAAGAGGCCTTTGCATCTTCTGAAAACAGAAGCAGACCCTTAAACAGCATC
ATCTATAATTTTCAATACCACTATTCTTCCCTGAATCCCTCACCGAAGCAGCAACCGTGC
TGTCCTATTTTAAGAAAACACAAGTGATCCTGGCGCTTGTATACGAGCACATGGAAAAGT
ATCTGTTCATTTAATGGAGGATAACACAAGTATACTGGGCAGGGACTACATAAGCTGGGA
CTTGGGAGTTGGGCTGCTTCAGTTTAGAGAAAACTCTGCTCATCTCCCATATGGATAAGA
GGACATAAAGTAATTGTAATCAGG
>comp857_c0_seq1 len=541 path=[519:0-185 705:186-540]
CATATAGAAATTAGCAAGCCTCTTTTGCTGCTTGTAATATCAAGCAAACTCGCCCAATAA
TGTTCCAATTTTAATTCAAAATTATAACCAAATTCACAAGTATGATTAGAGTTTAAAAAA
AGAGGGGGGGGGGAGGATTTACTCCAGCAGCTTATTGAACTCAACTAGAAGCATATTTTA
CAAACATGCAAAAACGATGGATCTAATGCAATGATGTGCCAAAGGATTGGTCACTTTTCC
TGAAAAGACAAAAATAGGACTCCAAAGTGCAGAGGGAAAATTGTAAACATTTGGGAAAAA
ACAGAGCACAGTACTACGATAAGGTGTTAACAAAAAGCCTATGGATATTACAACGAATCT
ACATGTGGTTTCTTTTTTGGGTGAAAAGGGGTGTACTTGTGGTTTAAAACATGCTCTACA
ATAATTGAACAATTGTACTTTCTGTTAGAACCAACAGATCTTACTTGGCAAATCTAATAC
AAATCGAGTTGAGGGGTGAACATAATTGAATATTTTTAACGTTTTCAAAGAGTCTATAAT
A
>comp859_c0_seq1 len=512 path=[490:0-511]
GTTTAACATGAACATCCTTCTTTCACTCAAGCAGCATTTTGCAATTCCAGTCAAGAATGT
GATGTCCATGTGGTACGCCATACTACAGTTCCCAGTGGCTTTATGATATGTTATATACTA
TGAGACAATAGAACTGAAAGTTTACTAATGCAAGTGAACTCTGTCCTAAATTTGTCTATC
GTGAGATGCTTTATACTCAAGAAGTAATGATTATTGAGTGAGAAAAGTGCATTGTTTATA
GATCCTTTAAACTGGGTGCATGACATCTTATTGGTGTATATGTTGGGTGTGTCCCTTGCC
TGTAAGGAATAGGGGCTTTAGGTTTTGGAACAGACAGCAATGTTCTATGAAGCATGACCT
AAAACCTAGGGCTTGACAATATATGATGGTATAGACTCCTGTATGCACATGGCACCAGCT
TATGGGATATGTATATTATAGTAATATGCAGGTGTTAAGAAATCATTTGATTGTGGTTAT
TATTCATGTAGTCAATTCAGTGAGCATCTATG
>comp861_c0_seq1 len=665 path=[1:0-388 390:389-664]
CTTTTAATTAATATAATATAAACACAGAGAATCCATTGAACACTTGTTATTATGGTGTGA
AAAGGTGTCGAAATCTGGTCTACTGGACCGTTGATGACAAAACATTTTAATGCTGAATAC
TACAAATTATATGATTTATTTTTCTCTTGGATTCAGCAGGATTGGCCTGAACAAGACATA
GTAGGAATCTTCTCCAGGTTTCTTCTAGGTTGTTGGCTTATTTGGAAAAACAGGAATGAG
GTTGTTTTAACCGGTTATCTCGGGATGAGCATAAAATTATTTCCTCCTTTTGGAACTGGT
TTTCTAGAATTTAACGTTGATCTGGTCAAGGAAAAATCTCAAGATTATAATAAAGTAATA
TGTGAAGGGCTAAAGCAAGAAACCACGTACCAATTCCCAGCGAAGCTTATATCTTACAGG
CAGATGCAGCTTTCCATGAGGAATTTGGTGATGCAGCTGCAGGTTGAATTTCGCTTGATT
CTTCTTGTTCTTTCTGGTCTATTCAATCTGTAAGCAGGAAGTTTAGATCATCATCTCCCA
AACTAGCAGAAGCTGCGATCTGGAGTTCCTTGATTTGGGATAAACAAAAGAAGATAAATA
AAGTACTCATTGTTTCTGATGCCTAAGAAATTGTCCTTTGCTTGGGGACCAGTAATTCAC
TGAAG
>comp866_c0_seq1 len=339 path=[1:0-338]
AATCTTCAATTCCAACTTCCATCTGTAAAAGGCATAATATCATACTAAATATAATGGAGA
AGAAATAAAAGCAGCCAATAACAAATTTGTGAGGAAAGCACGAGGCAATAACTACATGTG
CCTGCAGATACTTTATCAATGAGTAATTGAAAGGAAATCGTTGATGACCCAACTTCACTT
TACCATTGCTCCTGGGCCATTATTGTGTTTAATTGATGGAAAGTATTGAGCATGAATCAC
CATCAAAGCTTATATGGTGGTAGTGAATTTGCGCTAGACAGCGTTGAAATTCAATTATTA
TGCTATTGAGCTCACCTTGATGCTATTGTTAATTGACGG
>comp874_c0_seq1 len=416 path=[1:0-415]
AATTCTGAAGCTGAGACAGCAGCAGGAGAATTCACATATTCAACTCACAAATGTTCAGGA
GCGAATTCGGTGTGCAGAGTTGAAGCAGTATCAGATGATATTTTTCCTCACCAGAATGGC
TAGAAAGCCAACGTTGATTGAGCAGTTAATCCAGAGGATTAAGCGAAAAAGGGAGCTTGA
TGGGGCTGACATGGTTAAGAGACGCAGATTGCTTGGAACCCAGTGCCCTGTAAGCTTCTC
TAAGGTCATGGGGACCACCCCAAATGTTGATTACAGGCACCAAGGTCATGAACAATTTGC
TACATTGCAATCCGAGCTCAGTGGACTCCTGTCTGAAACTGTGAACTCCGGCAGGATGGA
GCCCCCAGCTCCCTCTCCCCTGGAAGATGAATTATGCAGCTCTATACAAGGCTTAA
>comp875_c0_seq1 len=594 path=[572:0-137 710:138-593]
GACTCTTCGCTTGCTCCTTATCCTAAACAAAGAATTCTCCAATTAGTAATAATTTACCCA
AACTACAATATCTGCTGACAAAAACAAAATTTCCTTCTTATTTTAAGATGTTGAAGCCAA
GCTCTATCGTATAACTTACAAGCTGTCAGACAATGCTATAAAGGAAGAGAAAATTTAGTT
TTGCAAAATTCAGCTGCTGCCAAGAAACAAATAAGTAAGCATTTTGATAAGAACAGATAC
TTACTTAGTAATATAAAGACAAAATAAAAACGAAAATGGGAAATTCTACCCCAAACTCTG
AACAATGTATAGATGCCATGGATAGAAATTTATGGAACCGGGATCAAGTATGGAAACTAG
CAGCCAAGATAAAAAACAGTACAGACTAAAGGGACAGTTCAAAGCAACGAAGCCTGTATG
TATGTATGTATGTCTCGGTGTGTTATTAAGAGTAATAATACAAAGCAAAAATAATAAATA
AATGACTTGACAAGCAAACTCGAAAAACTATTTCACAGCAGCACGAAACTATGCAACAGC
AAATGATTCTTTATAAATAAGAATGATAAATTATAATTAAGACAGCATTAACTA
>comp876_c0_seq1 len=368 path=[660:0-367]
TCTCTCTCTCTCTCTCCTCTCCGAAATCAATTCAGCAATTCTTTCTCCATTACACGCACA
CACTCTCTCTATCTCTCTTCCTGGATTCAACCGCTCTTTCTTTCCTTGTTGCGAAAGAAC
CAACCGCCAACGAAAATAACCAGAAAGTGACAAGAAAAAACTGAATTCTGGGAGAGGGAG
GGAGATCAAAAATGGGAGATTCACCAAAGACTCCAGAGGTTAATACTAATAGGTCGCTGA
TGGATGACCTGCTCGGCCTTCTAAGGATTCGCGTCAAGCGTGGCGTCAACCTCGCCGTTC
GTGATGTCCGTAGCAGCGATCCATACATCGTCGTTAAGATGGGCAAGCAGAAACTTAAGA
CTCGTGTG
>comp879_c0_seq1 len=316 path=[616:0-315]
GCCAATTGATGCAAGTTTGCCAGGTAAATATTTCTTCTTCCCTTTTTCTGGGTTGCCAAG
GAGAAGGGTATGGGGTTTGAATAGTAGATGGCATTTTGTATCTTTCCTCTTGTGTTGCCT
GGAAATCAGAATTTGTACAATTCTTATAGCTTATGACATAAGAATATTGTGAAAAAGAGG
ATCTATTTTTCTAGTTTCTAAAAACATTGAAGGCTGAGCTCCATTATCTTGTTATTGATA
AATGGCTTTCCAAAGCAACATGCATTGAAGGTTATTGATAACCTTTTGAAAATACATACT
TTTTGAATGGAATGGG
>comp880_c0_seq1 len=472 path=[601:0-343 121:344-471]
ATTTCATCTTATACATATCCCTTTTGTATTTGTATATATATGACTCCATTTGAGTTATAT
TAAAAATTTTAAAATTTTAATTGAATTTACTAAACTTTTTCTATTTTTGCTCAGACTTAG
TATAGTGGTATGATGATAACATTCCTCTTAATAATATACACACACACACGCACGCACACA
CCGTAGCTTAAAAATCATTTGAACTTCAACTCGGAGTGAATAAATGACACTAATTAAAGT
TTTTATGTTTCAGGGTTAAAATATGTTACAGACAGGTCGACGTTAACAGATTTTGTCTTT
AATTTACTCCTCAAAAGCTCTTTAAATTTCAATAAAGTGGGGAAAAATTAGACTCATTCC
ATATGTGGCATTTGATTGACCTCTTGGTATTGTAAAGCATTTCTGGAAAGATCCTAAAAG
TGCTTTCCAAAGACATTTGGAAAAACACTTTGAATTTCAATAAAGTGGGGGG
>comp881_c0_seq1 len=777 path=[1:0-776]
TGTTGGAAGCCAACAAAAAAATCAATAGGAAGAGATATTCCTTGGCAGCACCACTGAATA
GTTTGCTTCTGAACTTGGTGAAGAAACTCAAAGGCTCGGAGGCTGCAGCTAGATACCTAT
ACAAAACATTGAAAAATTCAAGTTTGAGTATCTCACACATGGTTGGACCAGTGGAACAAG
TGGCTTTGGCTAGTCATCCTATCAAAGGCTTATACTTTATGACTCCTGGTTTATCTCAGA
GTCTAGCCGTAACAGTAACGAGTTACAAGGGATATTTACGAGTTGGCTTTGGAGTGGAGA
AAGAAATCATAGATGCAGACCAATTCAAGTCATGTTTCGAAAATTCTCTGGGGCAGATGC
TGAAAGCAGCAAGAAGTATTGCTACTAAAACTATCTAATTGATCAAAGGACCAAATAAAC
TAGAATCTCCTACTTCAATGTTGTCGCATTTTTCGTTTGAAATGTTTTACAGTGACGTGA
TACGTTGCAATGAAATAAAAGAGAGAAAATAAAATAAATAAGAAGAAAAAGAAATGAACG
CGAAGAGAATTGATAGAGATGGAAGTGTCACCGTGGGAGGTCATGCATGTGTTCTGGTAA
ATCTGACGATACTTCAAAATAAGGTGACTTATGGTACTGTTATTTAGTAATAAAGATTTG
AATATTTGTCTTTGTGAAGGTGCTATTATTGTGAAAGGATAAAGGGCATTTGTAATATAT
ATTTATGTTATTTTGTGAGAAATCTTATATGAGATTGAAATATCTATATATTGAGAG
>comp883_c0_seq1 len=596 path=[191:0-21 400:22-404 213:405-595]
AGACATTCATAGGTTCCTTGACAGGTATTGGCTTTCACCCTTTGTTTCATCCTTTGGTGG
GTGTGGAGTATGTTGCCGTCTCATTTTCACCCTTGTTTCCTTTCTTCAGTTTTCTCACAG
GTAACTGTGTTATCTGAAGAAACATCCTTTTTTCTTTCATCTCATTTTCCCAGTGTTTCA
CTCAATGCTTTTGTTTTAGGTGGTTATTTTATAAAACAAGCTTAACACCTTTGCACGCAC
CTCTTGTGCACACTTGTTAATTCATTTCATTTATTTTCTCTGTTCTATTTTCTGTTGGGG
AGGGGGAAACTTGTTAGCTTCAATTTTTATGCAGGTTATAATATATTTGTAACTTGGGTT
GGGCGACTTATTATATATAGTTTTCCTCAGGGCTAATTTGAATGTAGGTGTGAAACTAAA
TTGGGAAAACTTCACTGCTGCTGCTTGGATGACATACAAGTTGCAGATGTCATGTCACTG
CATGCTTCTTTGAGTTACTGATTTGCATTTTGTCAAACTCCTCACCCTTCTCAAATTCTG
TATCAATGAATATTTCTTTTTTTCCATCCTTTTCAGTGGCACACTTGGTTGCACCA
>comp884_c0_seq1 len=340 path=[57:0-55 115:56-339]
ATCATCAATGAAAGTAACAAAATATTTGAACCCTAAAGTAGAAACAATACGACTAGGACC
CCAAACATCAGAGTGAACCAAAAATGGAGACGTAGCTCAATTACAGACTTGCCAAGTTGG
CACGACTCACAAGATAAAGTAAACAGCTTGGATAAACTCAGAACCATTCTCTGAATTTTG
TCAAGACTAGGATGTCCCAACTGAGCATGGATAGTGTGTGGGGATTCTGTAGCAGAACAA
AACACAAGAAGGGTTGGAGAGCTTGTAAAGGTCGTGGGACTCACATCCAGTGTCAACATT
CGTTCTGAACTTTAGCCCTTTTGGAAGATCATATGAAAAG
>comp886_c0_seq1 len=535 path=[1:0-534]
TGGCAAACCTATTAACCCAACCTGTCATGGACGATGTAAGTATACACGGTGGAAGCTGGA
AAGTAATATAAGGAAGCAATAATTCAAAAGATGGATCAATGCTACACCTAAAACCTCCAT
CACTTGGCATATAGAATTAGACTTTGGGAAGTAGCACATCATCTTATCTACCCTGAAGCC
CACTAACTCCCAATTTCTGAGTATTAAGTACTTCTGAAACCACCCAATGACCTCACTCTT
CATGTCAGAGCATCTCTCACCCTGCCCTACATCACTAATGAACGACTCAACTAGATCATT
ACCCAACTTCCTCTCCCTAAATTCAAAAGACAATGAGCAGTAGCAATCCAAGCCAACAGC
ATTTCTGTTCTTTAAAGGAAATGCTTGTACATACAAAGTAATAGATAAGTTCGGTACATA
GTTCTATCATTTAAAGTTAGTAAGAAAGTTAATTAAATGGAACTCAGATTACAGTATAAT
AATCAACATGTAATTATCTAATTGTAATCTAGTTTCCTCAAAGAGAAGTATCATG
>comp888_c0_seq1 len=908 path=[886:0-907]
ATAGGTTAGAGTTACCAAGATCCCTGCAGACAGTATCATCAGATGGTGAACATAAATGTG
GAGAGAATACAAAATGCTTTAATCAATCCAATACATTGAGTTTGTCTTTCCAAATATATA
ATTAAACTGGTTGCAAGAATACTCCATTCCCCACAAAAGCAAGCAGCAATGAGACACTAG
CTAATGCCATAAAATATAATACAATAAAGCATCTTAGTCAATTACTTTAAAGCTATTCCT
GGAAGAAAACAATAATAATAGTGATATCGTTCACAATAGAAAGAACCTAAGCATTAAACA
GGGGAGTAGCAAAAGAGAACTTATAGCAAGTAAACCTTAATGAGAAAAGAGGTTTTGTTG
CCTTTTCAGTCTTCAAAGCCTAACAACATATTTTAAATTGCTATTCCTAAGGTTTTACAG
TATTAAGAAAACCGTGAAGCGGATTGTGTTCTTTGTTTTAATACAAATTATTCAATCCTA
AAATGAATGCCTAAACCTCAAACTTTAAGTGCACACTCTCACAGAGGATCCCTCAATTTC
CTAAAGCAATCAACAAATTGAGGATATCCTTAATTGCCCAAAAAACATTCATGCTCTATC
TTCTCAAATTCTGTGATTTTCAGTCTTAACATCATATGCCTTCAATTAAAAGGAGCTGCT
AGCTATGCAGTTCTTACCATCACCCCCCTCTCTCCCTCCCCTCTTAAAAACCAAAGAAAA
ACGATGTAGCTAAGTAGTTAACATATTACATATATATCAGTATTACATATTATGCTTCAT
ATCACCCGCATGGAGCCCCATCATCAAGCCGATCCACAAAATTCCAACCCCACATAAAAT
TGAAATTAAATTACACTGACAAAGCTTCACAGAAATAGAATTATTGAAATTATTACAAAA
AAATAAAA
>comp889_c0_seq1 len=587 path=[565:0-586]
GGAGTTGAGGGCACGAGTGAGGCTGAGGCGGTTGCCGGTGATGGAAACGGAGGAGCTGAG
GTAGAGTTGAACCGCGTTGTAGAGCTCGTTGGTGTTAACGCCATCGATTTCGGTGATGTC
AAAGTAGCAGTAGGAGGAGAAACAATGGAAGATCCTGTGGAAGAGCTTCACAGAAGCGAA
GCGAAGCTCTGGTGGGAACACACTCTGGAGGAGGGTTTGGCAGAAAGCCATCACACCCAG
TAGTGATCCCAAAGAGGTCCAATATTCTTTCATTTTCTCTCTCTTTCGTTATTAATCTAA
AGGCTCTTCCTTTTCGGTGCTTGTGAAGAAGCCTAGTCGCCAGATTGTTCAAGATGGAAA
CAAAGGCAGAATGGTTTTGGTTTGAGGGAGAGAGAGAAAGGGGTGGTAAATCCTGTAATT
TAATCAAGGTGATCTGATCATAGAGGATGATGGGTTTTGCAATGGGGCGTGAGGGGCATG
GAGAAGCACTGGGAAGTTTGTGGAGAGAAAGGGGGTGGGGAAAAAGGGAGATACAAGCTC
ATGTAAGGAAAAAGTTGTTTGATATGGAAGGGAGTAGCTGGCCAAGG
>comp891_c0_seq1 len=632 path=[610:0-631]
AAAAAAAAAAAAAACTTAAAAAGAGTAGATGACAAGCCCAAGAACTTGTAAGAAATGTTA
TGAACATTTAGGTCCAAACGCAAATATACAGTTGTGTGACTCATAATATTCATATCAATT
AACCTTTCACTGCCCCTCTAAGTCCTACAAATTTAGGCCAAAGGTTACATTTTGAAGTTT
TTGATAGAAAGGGAAAAGAAGTTAATGAAGTATGGAATTCAGTCCCTATTCCATATACTA
AAGTTGATGTAACGGTATATAAGTAATTTAACAAATATAATTTAAAATAAATAATTATCT
TGCTTACTCCCAAATTTAAGTGAGAAGAACTTTCAATTTCGAAGTCTCGAGGGAGAAAGC
ATCCCGCCATCCCTTTCCCCTCCCTTCCCTCTCTCTTCCCCCATCCTTATTTCCTATCAA
AATATAGCATAAAAAATGATTAAGAGTGTATATGATAAAGGTGGAAAAAAAAAGGAAGAA
GTAAGAAATAGAGAAATGAAATTGAAGAATCTATTCAGATTTGTATTGCTTCTAAATATT
TACAAATTTTTATTTTTTTTTCCTTCCAATTTTTACTCCTACTAAGCACAACTTAAAATA
CTTATTGTCATAATTTATTATTTATATGGCAG
>comp898_c0_seq1 len=322 path=[736:0-321]
AAATGTCAGTTTGGTGAAGAGGGCCCCTGAAAATTGGCCTTGTACTATCATTGTAGCGTC
CTTATTGTTTAGACCCAAATTCTCCAAGTTTGGAATCACCTCTTCAATTATGAAAATAGG
TTGTTGCAGTGAAAGTTGGAGTCTGCCACCTGGAGTCCTTCCTTGGCTGTTCGTAGACTG
TGTCTTGAATAAATTCAAGTTTGTACATTTGGAAACGTCAATCTCTTTTAAAGATGGACA
CAATAAAGTGTGATTCCCTGCATAGAAACACTTGAGTTTATGTAAGTTCCAAAGCACCAA
GGAGTTTAGTTGATTAAACTCA
>comp900_c0_seq2 len=647 path=[625:0-315 941:316-646]
GAATAGATTGATGCAGAAAAATCTGAAAACAAAACACATAAAGCAAGTGCATTAGCAAAC
AACTAAGCCATTCAAACCCACTCAGTTTTACACTGGCATCCACACCAAGATAGCCATGTA
TGACAAAAAGCAAAAGAAACCCTAATGTTAACACATGACAGTGAGAACTCTGGATGCCAT
CAGAAACAAACTTTTGACACATTATTCAATCCCGCATAATTTCTAGTAAAGAGAATATAA
TTGGCTTGCAAATTCCAAACTTCAAGTAATAGATGCAAAAACCAAAATATCTAAATATCC
ATTAGACAATCCTAACTGAACTAGCCACTCAAGGTGAAGGAGTGGGAAGGAGGCACTCAA
TCTAAGCCCTTGGAGTCCCAGTTCATGGATCAGGAGCACTGGTAAAATAAGAATATAAAC
TAGAATGAATAACCATCCTCACGTTCATTATGTCATTCAAAGAGAAACAGACAGACAGAG
AGAGAAAGGGATGCCCAGTCATTGCCATAAACGATATCAAGGAAAACTAAGGTAGACATC
ATACAACGACCCCCTTATCCACCTAACCCTTCTAGTTTGAACAAATATGGCAACATTCAC
GAATCAGGAGGGAATGTTCCAGAGATAAAACACAAAATGAAGGAAAC
>comp904_c0_seq1 len=687 path=[701:0-627 1329:628-686]
TCTCATTGCTCCAGCAAGGAGCCAAAACTTCAGGTTCTATATGCAAGAAGGAAGAATGAA
AAATCATTTCAAATCAATGACAATATACCTTTGTATTTATTTTTATAAAAAAAAAAGCAT
ATCTTGTTAAAACTTACTGGGTAAGCACTCTTTTTGTTCAATAAATATATAGGCGACAAT
ATCACATTGGTCCTCCATTAATTGGCAATTTGAAAGCAAAAATGTAATATTGAATGACCA
ATTTGATATTGGATAATGGATGACTAATTTGATGTTATGATGCCGTTATTTAGAGTACCA
AAATGAACATTTACTCAAACTTCTTCAGCTAGTTGTAGGAAAAGGGTTCCAGCAGTTTCA
GAAGGGTGGCGTTCAGTTATCTGGAATCCCAACAAAGGTTCCAGCTTTGAGCTTTCTAAG
GGGAAAAATGAAAAATGAAAAAGACCCAAATCATTTCTATAAACCCAACGGAAGCGATGT
AGAATCGCAATTGTTCCTCTTTTTTTCCCATCAATTTCCCCCCAAAACCCCAATATAAAA
AAAATACCAATTTTTTTGTTCATCCATTACACAATGATTTAAAAAAAAACCACGAAAAAA
GTTAACTTTGCTTCGGGTATTCGATCTATGTTCCAGAACAAAGTGAAAATTAGATTAAGC
ATCAAATTCGGTTCCAAAATTAAGAAA
>comp906_c0_seq1 len=358 path=[367:0-242 610:243-253 621:254-357]
TACCCTTTTCTTTTTGTGACATCCCCAGAACTCGCTATTACCACCGCCATTTCCCATGAA
CTAGGAAGTCTCAGAGTTTAAGGTTCAAACTTTTCTTTGTTTAAGGCTAAAACCCAAGTT
AACCCCAAAACCTCAAATTTAGAGGCAAAGGGTAAGAGAAAAAAAAATGAGTGCTGCATT
TCTGAAGAATCCCACCACGATTTCCCGTGTCTTGATCCAGAGGCATTTGATCAACCATGG
CAATGACCCATTCAGAGCTCCTTCTTTTCTCTGCAACAAAGTGCAGTCCAAACCATATTT
TCTGAGGAAACCCAGAGAATATGAAATCTCCCCATCTTTGTTTTCTTCATCCTTTTCT
>comp907_c0_seq2 len=387 path=[1:0-344 346:345-386]
AGGACCCATTATAGCCAAGAGCTGTCCTGGCTTGGCATAACCCGTCAGACCTTGAAGGAT
TGCCTTGCTGCCGTCCTTTCTACTTGAGACAGTCACCCACAAGTCCTCCCATGTCAAAGA
AATACCCTGCTCTGCTACCAGAATCGAAACAGCTTCTCCCCTGCTTCTCTCCTCTGAACA
TTTGGCTCCCACCTCCAATTTGGTGTCAATGTCTAAGCTAGTTTGCCCTTGTCTTGAGCC
ATCGTAAGTTCCATTACAGCTAGCTCTAGTTCCGAGAGGTACACAAAGAGAGGAACTCAT
GCTCAAATAGAGTCTTTGTTTGACACTGAAGGTAGAGGCAGAGAGGGAGGCACACAATGC
TTGAAGTATAAAAAAACTGATGCATAT
>comp910_c0_seq1 len=679 path=[657:0-678]
GCCCCCTGAACGGCGCATCAAGCTTGAACCTAGAGATGGCTACACGATATACACTCACTT
TTAAATATGGAACCGAACGAAACCAAGCTGAATTGAAGTGAGCCATCACGGTGGGGCTAA
GCTAAGGTGCAAGTCCAAGCCGAATCCATCATCAAAATTAGGCCCCACATCCCCTTTGGA
GAACCTACCCAAAGAAGGCCCATCAACCATCCCATGGTGGGCCCGGGCCTGTACTTGCGA
GCCCATCGTTGACAATGCGGGTGAGGAATCCCCTACACCGCCACCGTAGGCTAACAACCC
TGCACCCGCGGATCTCGCGCTCGTTATAATGCTATAGTTACCGCCGCTATTGTTACAGTT
ACCGAGACCGTTGTTCGCCGACGGGAACACGCAACCGTGTGACACAGACACGTGGAAGGG
AGGAGGAGCGGCACGTGGCGGAACGTAGACCCACGAAGGAGATCCAGCCGGAACCACCAT
GGGGCCCGACGGAGCCAGGAGGTGGGGCGGCGGGGAGAAGGCGGAGATGATGGGGTTCCG
AACGAAGGAAACGGCGGCGTTTCGAGAGGCCTGTAGCTGCGCGCGCTTGAGCTGTTGGCG
CTCTTTCTTGTGAGCGTTCTGGTGGCCACCGAGGGCTTGTGAGTTAGCGAACTCACGGCA
ACAGTACTGGCACTCGTAT
>comp913_c0_seq1 len=1254 path=[1:0-1253]
TGACAGGAAGCAAGTGTTTGATGCCCCTCTCAGTCAGTACCCAAGAATGATCGTGGATTC
AGAATCTTGGGCCTATGGGTTGTTTTGATTTGAAATCCCCCCCCCCCCCTTTTTCTTTTG
TTTTATATTCTAAATTACTTTTACTTTACAAATACTTGCAATACTCGTCCTCTAAATTAC
ACATACCCTAAATATATACACGTTTATTTGTTGCTTATATATATGCATGTTCATGTGTGC
GTTTCAATTACAAAATACAAATTTATTCAAAATTACTCGTGAGTTCAAATGAAGAAGCAC
AGATAATAGAAATAAATGTATGCAAGGAAAACATATGCCGCATGCAGCCTGTATGAATTG
GGATAAAGAGTAGTATCATCAGATATCTTTCCTTTTGAGCTTGGGATGATTAGCAAACAA
ACTTGACAGTGCATGCATTCGTATAACAAATAGAAACTACGTGAAGACATTAGATTACAT
ATATGGCGGAAAATGAGTAGTACCTAGACTAAGAATAGATAGCTTAGCTTGAAATGTATT
GATATCACTGAACTTATTAATGGAAGAGTTTGTGTCTTGGAGTTGAGATCCAATATGAGT
CCATATTAAAAGGCAAACACGTATATTTATGTTTCGTATAGAACTTTTTAAGTTCCATAA
GAGTATTGTTAAATTTTCTTTTTAGTATTTATTTCATATATTATTATTAGGACATGGTTT
TGGTCATGTGATCCTTCCACTAGAAGTTCAGAACATTGAAATCGGCAATTCGTCATTGAA
ATTAAAATTTGAATTACGCGTTCAAAACAATTGAAGTGTATGATTTAGTTGAGATGTCAA
GATCTTACCAAACATCTACTGATTAATGCAAAATTCTGTGGTCTTGTGACTTGGTAGTAC
TTCCATTAAACAGATAAAACAAGCAAGGGTAGATAATGGTCTTTTGCTTTATTAATTCGT
TTGTCCAAACAAGAAATGATGATTTCATAAACCCACTATAGCTTTGTATATTTGTTGTTA
TTTACCAAACTATGGTAATTATTCATTTTTCAACTCACATGCCCATTTTTAAAGAAGTTT
AAAGAAATTTATATACTTGTAAATTTGTAATAATACCAAAAAAATTGGGGTGGCTAATTA
GAAAGTGATTGGTAGACTACTAGACTGCGTATTTTCACTTGGCACTGCTTCTTTATGCTG
ATTTGATTTCAATTTTCTTTTTACACTTAACAGGATCTGGCTTTGGATCCAAGA
>comp915_c0_seq1 len=1345 path=[1:0-969 1958:970-1344]
AGAGAGAGAGAGAGAGAACAAAAATCCAATCCAAAGGAAATATGGTTAAAATCTTCAGAT
TCTCACTTGACTTTAATGGGCAGTAATACTGTATTAGGTTGATTTGGTAAGTCTGAATTA
TGTCTCCTTAATTTTTGCACTACAAATATTAGTTCACAAACTATAGGCAAATTCCTTACT
AATGCACAATTTAGTGCATTGGCGTATGATTTGCTGCCCCATTATGGATATGTTGAATCC
TGTGACACGTTGCAAGGGATAAAGTTTGTCCAACCAAGAAGGAAGGTAGCAAGAAAAGAG
TATGGAATATGGATCCGGACAGGTGATTGGAGACAGCAAGGATTGGAATAAGACTTCAGA
CATGAGACATCCACCAGCACACGTGTGTAATTCATGGTCCTTTTGGATTGCTTCTTTGAG
GCCAAGTATATATGATACGTGTCAAACCCCCAAAATCCCCCAAAATCTTCCTAGAGATGG
AGGAAGATACCAAGACTAAGGAAGCTGTCTAGGGCTAAGGCCACTAATGAACTGAGTTAC
TCACAAGCTACTTGGATTTGGCCCCTAAAACCTCGGCTTGGCTCTACTCATACAATAAAT
GACAAGCTTGAGTAGTATAAAGAGTTCTTGGATTGCTGTTGGGTTGAAACTGGAGATTTG
GTGAGTGAGTAAATGCAAATGTATTAGCAAAAAGCATAACATTCATGAAGCATAGACATG
ACACTGGACACAAGACAACTCAGACACAGTGACACAACAAACTTCAAATATAAGGGCGCT
GCAAGGCATGGACATATATATTAAAAATTATACAAACATGTGAGTATTGATATCTATAAG
TATGAAAGCATCTACAAGTATAGGAAATATATCTGAGATGTATTTGGCATGTGTTAAAAG
TAAAACGTGTTTAAAAATCATCTAAGAAGTGTTAAAATTACAATTAATAACTTTATATTC
CAAAGAGTGCTGTTTGGAAGTGTCTGAGTGTCGTATTAAGTGTTAGAGTCTGACACGTGT
CCACATAGCAACGGTTCTTTTCTTGAAGTGTCAATGCTTTCTAGCTTAATAGATACTACT
TGGCAGGCCTAGAAATCAATTGTTTAAAAAAATGGAAGGCCACAAACTAATGAATTTCAG
AAAATTGAATACTTTGACACTCATTATTATTATTATTATAGCTCAATTTGATTAATGCAG
TTTTACTCGCGCAAAGTGGAAAGTTAATGAACTACTATTATAAAGCTGCTTAAGATATAC
TACTATAAAACTGGTATGAACCAAGAAATATTTCACTTGTGCAACATAAAGTTGGTCTAC
TCTATTCTTCTTTGGTGGATGAATT
>comp919_c0_seq1 len=556 path=[1:0-555]
GTTGAGTTCCCCCCCCCCCTCTCTCTTTTTTTTTGGGTCTTCTCTGTCATTTTCTACTCT
CAGTAAGTAAAATTGTGGCCCATGTGATGCCACCAATTGAGTGCATCAGCTCTAATGAAG
CAAAAACAATAAAGGAAATGGTGCAAAACTGAAAATGCATAAGCTCATAAGAACGCCTAG
TCCCTTTGCATATCAGATCAAGAAAGACCCTTGAAAATTCCATCAGCTGAGACCCATAAG
CTAAGAAAATAAGCCTATCCCACAAAAAATAAGAAGGAAGGGATTTCTGTCTAAAGACTC
TGGAATTATGCTCCAGCCAAATACACCTTGATTATTGATTGTTATATTCTTCTATTCCTT
CTTGTGAACAAGAGAAATGAAGTGACCACTGTGAACAAGAGAAATACACATTAATAAAGC
AATTATGATTCTCATTATGTCTCAGCTCATAAACTGGTCATTGCTACCTCATTACTTAAT
TTTGCTCTTGAATTATTTATGATATATTTGATAGTTTATCATGCAAAAATTACAGTTCTA
CATTTAACCTTGGTCA
>comp919_c1_seq1 len=406 path=[1067:0-405]
GGAACTCAACCTTCTCCGTTACCATCTCTGCCAAGGAATATTTAACATGCAAGAATATAT
CTTTCTAGTCAACTGGAAATTCAATTTCACTTCAAAGAAACGGCTCCTAACACAAATGAG
CTTCTAAAACTTTGTACTATTATAAGAATTAGACATGTCAAGGGAAAGACAATGTGATTT
CAAGCTTTCAAGACAAGAAACTCCTTTCTTTTACTCTAAGTTGAGGTGGACTCAAATGGC
CATATCAGTTTTTGTTCAACATAAGCTGGAGAATGATCATTGCCCTTAGATAGAAACAAC
TACATATTGAAACCATGTACTAAAACTGATTCAAAATATACATACTGCCAGGAAAAACAG
AGATTTGATAAACAGTCCCTACCTAAACTTGCTAGTTGAACTGGAG
>comp921_c0_seq1 len=446 path=[424:0-227 909:228-243 668:244-445]
GGGATTGGTATAGGAATTGGCGTTGGCATTGGAGTTGGAGCTGGAGCTGGAGCTGGCCAT
GGATCCGGTAGCGGTTCTGGCAGTGGCGGAGGGGGTGGGGGTAAACATTAAGCATGAGGT
TATCTAGCTCTTGCCAACAGTATTTGATGTCCCTAAAAAATGAGTCGTTTATGTGATTAA
TTCCAGAAAGTGTTTTATTGAATTTAAGGTTTGCAACAGTTTTATCTCAATTATGAGATT
GATGCTATTGACACTATCTCTTCGGGTGATCCCAATTTTCCTATATATTAATGGGTTTAC
TTGTCAGTTGTTACGGAGAGAATAAAATTCCATCTCTATTTGAAAATTGTAATAAATTAC
TTACGTGCATTATTATGTATTTCTTTTCCTAAATTGCGGTTTAGTGTACGTGATATATTA
TAGAATTCATCTTACGAATCCGCCTT
>comp922_c0_seq1 len=451 path=[1:0-254 256:255-265 267:266-450]
TGAGTCGCCAACATGGCATGCTCCATGTTACCGAAGAGTATACTATTTCATCTTGTTCAC
TGGCAAGTAGCAACTGATACTCAAAAAGTTAACTCTCTTAGCAACAAGTACATACAAATT
TTCTGTGAACAACTTTTGGAATAAATTATTGCGTGAACAGTGTGTGGATCTGGCTAGACT
TCCTTCTGTAGCTACGTGAACAGACGAGAACGACAGCAGACAAAAGCTTACAACCACTCC
TTACAAGTTTGACGGAAGATGAAATATCCCTGGACGGCGGACAAAAGCTCACTTGGACGA
AGGCGAACAGATGACTCCCATCGATGCATGGCAGCTCTGAGCTCCCTTCGGTTGTTGGAT
GTCAACCTGGAAGGGGAGAAACTTAAAAAACCCTATCTTAAAGCGCTGAAACAACACGGG
AAAGCATGAAACATCACTACCTTGGAAGAAG
>comp923_c0_seq1 len=330 path=[1:0-289 291:290-329]
CACTTGGTGAACAATGGGTACAAGTATGATCCCACAGCTGTTTTTCTTAAAATTTGTTCT
GAGCATGTATTGCTGTTTGTGGTCAACATTTTATATCCTTATGCTTATTGTAATAGACCT
GAAAAACAATTTTTTTGTTGATACCGTGCATCTTATTTGTACTTGTTCCCACAGATGGAC
ATCCATTATCATATATTTCTGACATTGCATTCTTATGTTAGCTGCCTTTACCTGGCCTAG
CCTTACTTTTCCTTACCTTCTCCTAACTTCCTCTGACCCTCGTAATGGAGCTTCTTGATT
TTGGTAGGATGAACGTGAGCTGAAAAGACA
>comp924_c0_seq1 len=402 path=[1390:0-146 390:147-401]
AATATGAGCACTTATAAAGATTGCGTCAGAATTGATTCTAGATCATAGTTGAAACAAGAT
CCCCAATTTACAGCTGCAATATGTTGCAAGAAAGCTGAGAAGACCTATGATGGCACAACT
AGGAGATTAGGGATCTAAAGAAAACTTGGAGCTGAACCCTTGCCTGCGCAACCTTGGTCT
TCAACTGCAATAGCCATGCACATTCAAGCATGATCAGCAAGTTCAGAATGCTTGGTCATT
CCTGAGAACATTTGTTGCCTCCTGTCTTAATCAAGCCGTCTTCCTTGGGGTTTATTCACT
TTATCCAAAGCTTCTTCCCTGAGTTCAGTTGTAAGCAGTATTAGTGAAGGCAACAGTATT
TTGCATCTATCGCCAAAGTAAAAAAAAAATTAAAAAAAAAAA
>comp925_c0_seq1 len=972 path=[1:0-971]
GACACCTAGCTAATAATACAATCATAGATACGATTACAGATATATAAGGATCCCTTCCCA
AAATAGTTTTGATTTTTCTACACTCCCCCTCAAGCTGGCTTCAAAATATCTTTCATAGCC
AGCTTGCTTACTAGGTGACTGCTTGAGTCCATACAAGGACTTTTTCAGTCTGCAGACTTT
TCCAATCCCAAGTCTTTCTTCAAATCCTGGTGGTAGGTTCATAAACACCTCTTCTTCCAG
GTCACCATTGAGAAAAGCATTTTTCTGCATCAAGTTGAAATAGAGGCTAGTTAGAATTTA
CAGCAAGGGTCAATAGGACCCAAATTGTATTTATCTTTGTAACATGGGCAAAAGTTTCTT
GGTAAGCTATTTCATAGGTCTGAGTAAAGCCTTTTGCTACTAATCTGGCCCTATACCACT
CTATACTACCACCAGCCTTACTTTTGACTGTGAACACCCATTTGCACCCCACAACCTTCT
TCTCACTAGGTAACTCAACCACCTCCCATGTACGATTCTTCCTCAATGCCTCCATTTCTT
CAAGTACAACTGATCTCCGGTTCGGTTCATCTAATGCCTCCTTAATAATTCTAGGAATCA
TAAGTTTTGAAATTTTTGTAGTAAAAGCTCTATACTTCGAAGAAAGGTTGTTATAGGAGA
TGTATTTGGCAATAGGATGTCTAGTGCGAGTTCGGGTTCCTTTCCTTAAGGCAATGGGAA
GGTCAAGGTCTGTTTCTTGGATAACAGATACAGGGTTCAGATTAGATTCATTAGAATTTT
GAATACAAGACAAGGAAGGTGGAGAATTACTCGATGTATTTGGATGGACTTCACTCGGGA
ACTCCTCATGGTGGTGTGCTGAGCGGATCAAAGAATCTTCACCTCTTTCAAGGATATTTT
TCCTAGAATAAACCACAAGCTCAAAGTTGGATCGATTTTTTTCAATCTATAGCATTTCCA
TATCTGACAGAC
>comp929_c0_seq1 len=414 path=[442:0-269 712:270-307 750:308-413]
TCCTCGACTCTATTGCTTTGCCTGCAAAAATGAGTAGAATGATAAATCATAATACGTATA
ACCGCTAATCAAAATTGTTATTTCGAAAAGAAAACCACATAAATTGTATCTTAAAGTAAC
ACATGCAATATCATCAATATTCTACTCTGTTTCTTACCACCAACTTTCTTTTAGTCCCTT
TTCTCTATTTTCCTAGGTTTCACATGGCAACTACTTTTGAAGGTACCACAGATGCTCCTA
TCAGAAGCTTCACTGTGAAGGTATGAACCAAAGCATATGCTCAAGTTATTTGGTTTGGAA
GCTCTAAGAGGTAAGCTATCTTATGTTGAAAGTGACTTGAAAAAGGAAAAAATGACGGTG
GGTTCAAACTTCAAACTTCAAACCAATAGGAGTTAGGTGGCAATTCAAAGTCCA
>comp932_c0_seq1 len=334 path=[1:0-333]
GTGGAAATTCCTTCACATGTTCAGGTTACTCCATCTATCAAATCCCTTAGTTTGTACTAT
GAAAATTAGTTGATTATTACAAGAAGTTAACTGGTGCTGTGATTTCTACATAACCTTGAT
TTACGATTTCTGGGGTTTTTATCATCCACAGAAGATAAAACTATCAAAGACAGAAAAAAT
AAACAATACAGAAGCAATTTTTCTGCCTCTGCCACACATGGATGTAGCTTACGCTAGTTG
GAAATTTGTGTAGAATTCGTTAGTTTGTTTTTGGGAACTTGGGTAGAAGTCATAAATTTG
TTATCTTGACGAGACAAAAAAAAAAAAAAAAAAA
>comp935_c0_seq1 len=478 path=[456:0-477]
ACCCTTGGAGTTTCAACAGGAGGTGGGATGGTTTGACTTTTGTGTGATAGTTTAAACATC
ATCTTATTTTGATCAACAATAATATTTTTGGCCTGTAGCATTTATAATCTGAAATATCTT
AAAGTAACGTGCAAGTTGCTATATGTCCAACAGTGAAATGAATTTGACCTTAACTAATCT
TGCATGTAACTTGCAGATTGCAGTCTTTTCATGTATGAAGATATAAAAAAATAAATATCA
GTAAAAAAGAAAACTGTGACAAGAATGGGCAGTAACAAATTATCATGAATTTCCTCTAAA
ATTCGAACTCCCGTGCTTTATATGTTTAATTTTTGTTTGTTACTCCTTGGCATAATTTAT
TACCAACTTTGTCTCTAAAAATCTCTGAAAGAAGAGAAAGAGGCAGACTTGTAGTGAAGG
GATATTTATTTTGACCCCACTTTTGGTTTTGTTTCAGGTTGATGTGTTGAGCAAGTTA
>comp936_c0_seq1 len=788 path=[1:0-100 102:101-787]
AAGGACATGGTTGCTTTATCTGGTATTTCCCTTTTTACTAGTCTGATAGTCTCTCTTTCT
AATTTCCCCCCATCTCTCTTCCATTAAGTTAATATTTTTGCGTCTGTGTTAAGGGGGACA
CCTTTTGATGATGGTTTTATATAGAATTAGTCTTGGTGGACCTGGATGTGACAGTTAAAC
AACCATGTACATACATGGCATGTTAAGTCCTTTTTTAAAGCTAAAAGCCATGTCACTTCC
ATAACAACAAAGTTAAGCGAAACGAAAAGCATGTTTATCCAACTGAGAAAATATGTCTAT
CATTCATAATGTCTAGGAAAATAAATGAAACTAACTACCATTCATAGTTCATATTCAATT
AACTCTTCTAGAGAATATAATTAGCAAAAATATTTATATATCAAATAAAATAATATTAAA
TCAAATTATAATTTAGGATTTAATAACCCACATGGAGAGAATAAGAAAAAGGAAAAAGAA
ATACACTGCTGAAAGAGTCTCGTGTAATTTAATTTGTAAACTAGATAAAAATAAATAAAT
AATTATTACTTTGATAAGTATTGCATGATATCCAATCTTAAGAATATCAAATCAATTATC
AATTTTGATAATGCACAAATTATATTATACACCATGTGTACAAGAAAAAATCACCTAGCT
CCCATTATGTTTAGAGTTTAGTCTCCTGCTAAACACTTTAGATGTCACAAATATATATGG
GAATATTGAGTAATTCTATTTATGATGTTTTGTTTGTGGTTTCAGGAGCCCACACAATTG
GGAAGGCA
>comp940_c0_seq1 len=508 path=[486:0-507]
ACAAGTTCCTGCTGGGAACGATGGCTGGAGGTGCTGCTGACTGCGTCTATTGGGACCGCG
TCCTCGCCAAGCAGTGTCGTCTCCACGAGCTTAGAAACAAGGAGAGAATCACCACAGCAG
CCGCATCCAAAATCATGTCCAATATGGCTTACAGCTACAAAGACACAGGTCTTTCCATGG
GGATGATGATAGCTGGCTTCGACGTCAGGGGCCCTGAGCTATACTACGTTGATTCCGAGG
GTTCCCGCACCAAAGGAGACAGCTTTTCAGTTGGCTCTGGCTCAGTCTTCGCTTACGGAG
TGATGGACGCAGGGTACAGTTACGACCTCAGCGACGAAGACGCCTACGAACTGGCCAGGA
GGTCCATCTACTCTGCTACATTCCGTGACGCCTTTTCCGGTGGTCTCATCAGAGTGTACC
ACATGAAGGAAACTGGCTGGGAATGCATTTCCGTTCAAGATAGCAAAGACCTTCATTACG
CTTACTACCCCAACGGAAAGTGAGAGCG
>comp940_c1_seq1 len=399 path=[1370:0-272 1643:273-398]
CTGAAAAGCAGTTTGTTAGCGTCTTTAAAAGTTCCTTTTGTTCACTACATTTGAAATATT
AATCTGAGTTCATTGAAATCCACTAACCATGGCTTTGGAAAGCTTGATGGGATTCAAGGA
GAGTTTTGTGAGGCCGCGATTGATGGACGAAGAGGATGTCGATGAATCTTACGATATCCC
CAATTTCACCGACAACATGATGCTGGCACTTCCTCCGTTAGCGAATCCAAGATCAGCGTT
GGCCAACTTCCAGCAAGATCAATATGGAAAGGACATCAAAATCAAAGTTGATCACGGTAC
CACCACCCTTGGATTCCGCTTCCGCAACGGGGTTATCCTAGCTGTCGATTCTAGGGCCAC
TGGAGGGGAATATATTGGCTCTTCAACAATGAAGAAGAT
>comp941_c0_seq1 len=303 path=[1:0-15 17:16-302]
GCCAGTCTTGGCCAGTTGTAAGTTCTTTCCAGTTATGTTGTCTATGGAGCATTGGAAATG
CAAGCTATTGCCTGTTTTGGTTTTTTTCCCGTTGTAGCACTGTCACTGTAATTGTAGCAA
TAATCTCTATTTACTTATTTCAAAATACAACATCCATGCCTGCACATGCATTGATTTATT
TTATAAGTCTACACTTCATATTCGCCTCTTTTACGTATTTATTTTTAGCTTCCTAAATAC
TTGAATAAATGAATTATTTGCCAGGGAATTTTAACTATTGGGTATAAGTTGACTGTAGAG
CAG
>comp944_c0_seq1 len=321 path=[313:0-320]
AACTCATGTCAAATTCATTTTCATAACAATTTTGGAGTGATTATATGACCTACAAGTTCA
CTTTAACTGTTCAAGTAATAAGCTATGAAATTTTCATCATCGTGGCTCAGAGATGCAAAG
ACACAAATAGAAATTCTTCACGGACACATTCATAAAATGACAATAATGAAGAGCAACTTG
ATAGAAGCCAAAGTTTTCAATAGTTACCCACTTTTAATTAGGCTAATAACAAGCATGAAC
AGGACACGTGTAGTCAATGCATTTCCAATGAAAGTTTCAATTCAATCACAAACATACCGT
CCATAAACCAACCCCCATCAG
>comp948_c0_seq1 len=394 path=[372:0-66 439:67-72 445:73-393]
GAAATGCAATGACAAATGTGAACCTGTTTTGAACAGATTTTAACCACAGAAATAACTGGC
CGATATACGGAGAATATTTTACAATCCTAGCCTGATGCTATACACAAGACATATTATTAA
GTTTCTACATACTAGGAGAAGTAGGAGGAGAAGCAAGATTCCAAGAGAGAAATGCTATAG
GCTATGCCCTGAGCAACAAAGAATGCAAAAGCAATCCCAAGAATTTAATAATCAGCAGGA
ATTAAAGACAAGATAAAGCCTTGAGATATTAGAGTTGATCTAAAATTCTTAAACAAATGG
GCCGGGGAAATATTTGAAAATCAAAACAACAACGTATTTGGTACTAGAGTATAAACATCT
TTCAGAATTTTGACAATTTTCTCCTCTTTAGTTA
>comp958_c0_seq1 len=562 path=[1:0-22 24:23-561]
TACCATGATGATGGGTGCTGACTATTACCAAACAGAAGCTGAAATAGCAGCTCTTTTAGC
AGAGGGAAATGTTCCAATAGGCATTGGGAAAGATACCAAAATTGTGAATTGTATAATTGA
TAAAAATGCAAGAATTGGAAAAAATGTGATCATTGCAAACAAAGAAAATGTGCAGGAGGC
TGACAGACCTTCTGAGGGGTTCTATATTCGATCAGGAATCACTGTGGTGTTAAAAGACTC
TGTAATAAGCAATGGTACAATCATTTAATGATGGATGGTTATTAAGAGGTGATGGCATAA
CAGAGCATCAAAGAGACATACGGGAGGGTATATACCAGCTTCAAGCTCTGAATAAGTTCT
ACTGTCCCGGAATAAGGGCTCCTGTATCAAATTTTGAATCTTCACTCATGTAAACCAAGA
ATGTACACATTCATTTGGCAAAGCATTTTTTGATTTGTTCATTCAACAGAGAGGGCTAAA
GAATTCTGCAGGCAATTAAAATTCTTCTTTAGTTTCATTTGTATCGCTGTTATATACCTA
CATGGTTAATAATTGGTTAATT
>comp959_c0_seq1 len=450 path=[385:0-449]
AAGATCTTTCTTCTATATAGTCTGTTCATGATAACTATTTGAACTTTGACATATTATGGG
AATTAATGCCTCATTGGTATCCCATTTTTGTTCAGAGTTTGGCCTTTTAACATGTTCAGC
TAATTGTATTAGCCATTTTTTTAAATGGAGCATATATCAAAAGCATATACATAGTTGCCA
CATGATGGGTTATGGCCATCTTAGTCTAAAATTGGGAATCCTAAAGTGGGAGGTGAGCAT
TAGTGTGAGCAATGAAACTCATTAGCGATTGAAACCAGCAATAAGTGGTTTCCTTGGCGC
CATGAATGAGTACTACTATGATGCTATCTTTGACAGTGCAGCTGTTACACGTCATGTAAT
CTTATGGAAGCCATGGTTAGTTAAATTCAACCTTTGCTTTTGTTGTGTCTCCCAAGAAAC
AACTATGCAAGATGCTCTTATTGATTAAAT
>comp962_c0_seq1 len=549 path=[1:0-265 1110:266-276 278:277-548]
AGAGCGAAAAATTTTCCTGCACCCCTTTTCGTCCTCGTTTTTTAGGTAATTTGTGGAAAA
ATGGCAATTGGAGACTACCCTGCGGAGTACAACCGCAAAGTCCACGGCCCGTACGACCCT
GCTCGCTACTATGGAAAGCCTGATACACCTTTCGGTCAGGTCAAGCTGGGAGAACTTGGA
CAGTGGCTGAATCGCAGGAACAAGTCCCCTCAAGCAATCGTTGGGGCCATGAGCAGAGCA
TGGTGGAGATGGCAGCACAAGTACGTGCAGCCCAAGAGAACCGGAATTGCTCCCCTCATG
CAAGTCGCCGTTGCCTCAATGGCTGTTTTCTACTGTTTCAACTACAAGAGGATGAAGGCC
CACCGTAGGATGGAGTACCACTAAGCTACCGACCTCAGCTCCCTCACCTGTAGTTTCACC
GATACGAAGAGCTTCTACACTCCAGTTACCCAAGCTCTGTCTCTTACGATTTAACGAAAT
CAATAAAAGCTGCTCTTTTAGATCAACAGGAATTTCAATGAAAGTACAATCTTTGTTATA
TCAGTTTAT
>comp964_c0_seq1 len=599 path=[727:0-507 151:508-598]
ATATATATATATATATATCATTCTCTAACACTAGCTAACAGTGATTTTCACCCTTTTTTC
TCCTTGGCTAAGAAGCTAAGATCTCACTCAAATACTCCACATATGTTACACCACAATCAA
GTTCCAACAATCTTGGAAATAAACAAAGGCCACTTGTAATTAAAGGGGTTGGTCTTAATC
TCAGCAGCAACAGTGACACTTTATGTTACTGCATGGTGAACAAAAACTCGAGTACACTTT
TGTGCGCCAGAAAAACATATAGGAAAAGTTATAAATGCTTTTCACATTATTATTCTTTAT
TTTTTTATTGTTTGGATTATCAATCATGAGCATAAGACTATCTTGTTGGGGGACAACACA
ACCTCTTTACAACAAGACTAACATCCTATACCACTTCTCACCAATGATCTATCTGCTCAC
TACTATTATAGTGAGAAACCCAAACAAATGAAACCTTACAAATAAAAACAAACTAATTTG
GGAAAGCAGGCATCTGGGTTTTCCTGGAGAGTGTTCTCACATTCTGGTTCTTTTCTTTTA
TTGTTTGATTTATCAATCATGATTCATGAGTATAAACCACTGACAACACTAAGGGATAT
>comp967_c0_seq1 len=409 path=[451:0-369 65:370-408]
AATCTACTGTACCTTGGCCAAAAAGCCTTTTTTTTTGTGGTAGTTTTTTGTTGAAAAATG
TTTATATTTAATTTCCTTTTTCGGCTTTTCCTTTACTCTGGTTAGAAGACATCATATGTT
TATGCTGTAATTTTATGTATCCCACCTCTGCTGTCTTTAGAATTGTGGGAAGATAAATGA
TAAAATCAGCTACGGCAATAACTAAATATATGCTGATGTATATCATGCATGTTGGGTATT
CATTGTAATGATGGTGGAGCTGGACTTTTATTCATTTGGGCATCTGATCTGAATTTGAAC
AATCTTAGCTATCATTATATACTTTCGGGCTACTTTTATGCCCAATTTTCTGGGAACTCA
ATCTTCTCAGTTTGGTAAATTACAGGAAACGCCATATAAGGGACGTGAT
>comp971_c0_seq1 len=907 path=[885:0-906]
GGGAAAAAAAAAAAAAAGAGTATGAGAATATCAAGTCCAATGACAGTACCCAAAAAGAGA
GCTTCTATGCAAAATTACAAGAGAACTTTAGTGAGTCAATTATAATTATGAAGTATGCAG
AGAATATTGCAGAAGAGTAACCTTTCATATCCCTGTAAAATATTCAGTGTGACATGACTA
ATAGATTTTACCCCCTTTTTTGTACTTAACTATCTTCTACCTAGATCCTACCATAACCAG
GTAAAACCTTATCACCAGACCCTAGTAGTAGTAGTAGTAGCAATTATCAGAATTCATTAT
TAAGTGTGTCAAGAACATTGTAAAAGAGTAAAACTTCATGTAGAGAACCTGTTCTGTGTA
AGCATGTAGAAAATGCTGTAAAATAATAATGGTGGCAGTAGAAGAACAATTATCAGAATA
CATAGTTGAATAGCAAGTTTTGATCTCTCAATAAAATTGAACCTGCCAATGTTAAGTGTG
GCCTTTATGATAAATCCTATAGCCCCAAATTGCTCCTAACTGAACCTACAGATCATAATC
CTACAATAACCAGGTATGACTTCACTAAGACCCTAGTCGCACATCCTTACTAATATCCCC
CCACACCTATAAGCAGTGCAAAATAGGATTGGTATTAAATTATCCCCTGAGAAGGATGGA
CACTGATACAGACACAAACAACAGAATTTGAAGTGCCCGTGCTTCATAGGTTCTCCCCCT
CCCCCAACTGCAGGTTCTACATTGTTACCTTCAAATGCAGTATGAGCTTCCCATGAAGCC
AATAGTAAAAGCATAATGTTTGGATTTGTTATTAATCTGTCTTTAGGATCATGACCATAA
TCATAAACTTCCTAAAGAGGAGAAATTCTGGAAGCATTACTCACAACTCCAATGACTGAA
GGAAGCC
>comp974_c0_seq1 len=383 path=[361:0-225 587:226-246 608:247-382]
GGTATTTGTTATCAAAATATTATTCTGTTAAATTTAATCTATCTAAGTTCTAAAGTTGAG
TTACTTGTAAAACTATTTTTTCCATAGGTTTCATACATGATACATATGATGAATAATTCG
TATGTAAGGATTATTTTGTGTGTGTGTGTATATATATATGTATAGAGAGACAGAGAGAGT
AAATATGTAGCTAATTTTATAGTAAAATTTGAATCACATAAGAGATTATCCTAAAATATT
AGGGATGTTAATGGGTCAAGTTGAGTTGGATTTGAATTTGACTCCAATTTTGACTCGAGA
TTTTGATCGGATTAATTTTTATGATCTAAACCTGATCATATTCGGGTTCAAGTTGGATTA
GGATTGAGTCAATCTAATTAAGA
>comp976_c0_seq1 len=323 path=[301:0-251 553:252-264 566:265-322]
GTAGATGAAGTACTCCCATGGCCTGGACCAATGGAATGGGTTATCAAAAGAAAAGGGATA
CAAAATTAAAAAAAACACTAATAATCAAATGGATCTGTCAACTACATAAACATAGGAGAA
ATTCTTAGGTAGGCACAGTCTATAATAAGTATTCCATTCAACATTAAACATTTATAAGGT
TTTGTGAGTTATGTTATAAATACACCTATCTCTAAAGAGTGGTCTTACACATGTCAACTG
TTAAATGGAGTGCCTATGATATACCGTGCCTACTTAAGAATTATTCATAGAGATAGATAC
CCATTCCATTTATGCCACGATAT
>comp978_c0_seq1 len=1076 path=[1:0-1075]
AAAGCCATGTACCAAGTTTTTCAGGTTCTAATCTATTCCTATCCAAATAAATATTTTGAA
ATGTATATTTTCCATTTGTAATAATGTTATATTATAAGTTATTTTAAGAATTAATTGTTG
AATTGCTATAAAACTTAATTGTGTAATTCTGCAAATTAACTGGGTATTCGAAGCTTTTAT
ACAGGTACATACTGTTCTTTGGTCTAATCAAGTTGTAACAGAATAATGGTTTATTAATGG
AGCACGAAAAAGATAACAATTTGCAGGACGACAGTTGGCATTGAGACCATTATATCAAAG
ATAAATGGACCATTTTCCTCGTCCATGTTTACCTTGTTGCTTAATTAGTGTAAATTTTAT
TTCCCATTTAATTATGTGACAATAACTTTTCAGCTTTTAGTGCGTTCTAATGCTTATGAA
CCGACCTTTCAATTGGTAAGCTATTAACAAGCTAATACGATGAACTTTGATAGATTGGGT
CAGGTATGATGTCAAGATTATAGTATATACATCTAAATTTTAATATCATGGTTTTGTACT
CTTACATTTTGTTGAGGTTAGAGACAAATTTGTTTTCTGTCATCCATAACCTTAACTAGC
TAATTGTATCCAATCTCACATTCTGATTGTATGAAACTTTTGGCCAAGAATTAGAGGTGA
ATTTGATCAAGATGTTGTTCATTATTTTAAACCACCCTCTTATGAGAGTTGTTCTTTTCT
TTGTAAAGTCTTACCTTCTTTTTGCTCCTGAGGGGTGATGACTTCTTGATCTGCTTTGGT
TACTGCTTGGTAGCATGGTGACTTCTTTAGTTCTTTTATCTTCAATAGAAATGTTTCTTT
TATCCAAAAAGCCTTCAATATAAATGAGGTAATTAGGTATAAATATCCTTTATAAATGTA
AATTTGGTTTAACAGTTCTTACCTTTGAATGCCTGTCCTCTTCATATAATTATAATTATA
ATTATAACGTAGGATTCAACTGCCTGCATAATAGTTATTACGGAAAATTACAAAAAAGGA
ATTCTTTGGTAAAATTATTTCCAGTTTAGGAATAATCACTCAACTGTTGAAGGATG
>comp982_c0_seq1 len=394 path=[103:0-101 226:102-393]
TGCTGCTGTTGGTCAAGATATGATCAATTTAGTGGCCTCTAATGAAGACAAGGAGAAGTA
TTCTCGTTATTTTATTAGATCTTATTTTGAGGACAACAGAAAGGTAATACCATGCTGGAA
ATTTGATGAACTATTTGTTGGTGTACATTCTCAAGTTTTTTTCCTACTTCTGACTTGCTA
GTGTGACATTATCTTTATTGAATGGCACTACTTTACATGACTGTTCATGAACATTGAGAT
TGGCACAAATAAACATACATGAAATATATATATGTAGGGGATTGCTAACCTCCTCCCACT
TCTTTTTCCATTGGTGGAGGTTAGCAGCCTCCACCTTTTCCTTTAGACAAAAATGTCCTA
TTTCTGTGTCTTAAAAATCCAAAAAGCTCAAAGG
>comp985_c0_seq1 len=360 path=[338:0-302 641:303-359]
TTTTCTTTCATGAAAAAACATTTTAAAGACTTTGTGCACATTGTCATCTCGAGAAATCAT
TTATCCTTTCCCAGCTTCAAATTAATCAAATCATAAAATTTGTTCTGTTGGCTAGATCAG
ACACCATAAAAATATTGAACTTGTACAGTAGGTGCATTCCTCTCATCTTGATATCCACTG
CAACCTACTGCATCCTTTTTGTAATCTAGTTCTAATTAAGCTCCTTGTGGCTCATATTCA
TCAATCACATTGACAAAATGGTTTGAAGTTTGAACACCGATTGATAGACCCCCTGGTTCT
AAGGTGTATGTGAGGAGGGGCAAGATGGGGAATGTCGAGAATAATCATGCTGATGGAATG
>comp987_c0_seq1 len=719 path=[697:0-236 934:237-241 939:242-718]
CTAATCAATTACTATCATATCTTCAGATCCAAAGAAGAAAAACAGGAAACACTATCATAT
CTGACATATAATACAGAGGGATGATCAAGAAATCTAACTTATTGGGTAGTGTCAAGGCCC
GTGGGGGCATCATCAAAAGAAACAAAGGCTCAATCTCATGATGATTAAATTTGGCAGCAA
CAGAAGCACACAAGGCTAAAGCATAAGGTCTCAGAATTCTCTAAACAGAACCGACATCCT
CACACACGTGCACAGACCCCACAAGGTTTCTATGCTAATGGTAACAGATAATGTTCATTA
TTTGCCACAGATATAATACACAGCTTAATGGGCAATAAATGGAAGAAACAGATCTTCACA
AAGAAACGCATTATGATTACAATCTTCATATTATCAAAAAGTTAAGAGAAACTGTTGTTT
TATGTTTATGTAGTATGTTTTGATAATGATACTAGGTTAAAACTCATCTAGAAATCTTAA
ACGTAAAAATTTGTAAAACGATTTTATAGTTGAGCTCAGCCAAAAGTCAATACTTGTATG
GCCAATCCATAAACAAGTTGGAACAGTAACCAATTAAGAGTTAAGCTCAACACCCAACAA
TCTTCATATTTTGGATTAATCTATTATTCTGCTCTTGTAGTTTTTCACACAATTTTTTTT
TAAAAATAAACCACACATGAAAAGAAAAGGAATTACCGTTAATTAAGCTGTGATAACGG
>comp989_c0_seq1 len=666 path=[644:0-665]
TTCAATGTTTGTAAAGCCTTAACTAGAGTAAAAGAACAATGATCAACTTGCAAAAGTTAC
ATGCATTTGAATTACCAGAAACCACATTCGCTACCATTAATAGTACATAAAATCATAGAA
CAAGTAAATGAAACAGTATCATAAAGCAACAATCAATACTAAGCTCGAATATCATATCTG
ACAGGGAAAGGAAGTAAGAAAAACAACAGCAATCAGTAAAGGAAAAGTGCACTGAGACAA
AGAGACCTAAGAAGTATGATACTGCATCTAAAAGTAGCATGTACCAGCACATTAAAGGGT
CTAGACCAAGTCCATGTTGTATTCTTAATAAGCCATAGACCCAAATAATAGAGTATCTTG
AGATGTGTTAATTGATAAGAGAAAAAAGAAGCCAGAAACTGTATAATTCTATATCACTAA
TACGGTTCCTAAGAATCTGCATATTATGTTATTGGCTTATTGCTCACTTGCCAAAGACCC
AAAACAAGTCCAGATTACATGTATATTGTGGGCATTACAAAGTCATTCAAGTCTCTGCCA
AATTCAACCCACGTTTTATTTAATCGTATAATAAACATCACATATCATTAGGATGAACAT
TCATGTTGAAAAAATGTAACAATAGTAGGGGTCAGCATATGTACCTTCATCAGATAAAGT
TTTTGA
>comp997_c0_seq1 len=395 path=[1:0-394]
ATGGAGCTGCCACCGGACAGTAGAACAAATGTCCCTATAAGCTGCCCATTGCTGACCCTG
CCGCTCTGTTCTGTGGCCCAAGCAATCCAATAATTACTTCCTATTTGCATTCCTTGAAAG
AGAATTTGGCAAAGAAGAACAACCGGAACAAGTGCGCCTCTATAAGCGGATGTAACAAAG
GTTGAGTAAACATTCCATTTCACTCTACCAGTCTCTGCTTCCTCTTCATTGGTTTTCTCC
AAAAGCTTGCAATCCCTGATGGTCTCTTGAAGATTTTTTGCAGCATCTTCAATCTGATTT
GTTTGGCAGGATCTACTTACAAAATCATCTTCTTTGCATGGATTTATTTGCTTTAATGTT
ACTTTTTGAGCAGCCATTTGTTCAACAAGTTCACA
>comp999_c0_seq1 len=302 path=[280:0-301]
CATATCAGAGCCTTGGAGTTGTGTTTGGAGAGATAAGCACTTCACCCTTGTACGTGTATA
GGAACACATTTGCTGAAGATATTGATCACACAGAGACCAATGAAGAGATTTATGGAGTTT
TGTCTTTGGTGTTCTGGACTTTTACATTGGTCCCTTTGGTGAAATATGTGTTCATTGTGC
TCAATGCTGATGATAATGGTGAAGGAGGTACATTTGCTTTGTACTCTTTGCTGTGTCGCC
ATGCCCGAGTTGGCTCATTGCCCAATTGCCAAGTGGCAGATGAGGAGCTCTCGGAGTACA
AG
>comp1005_c0_seq1 len=488 path=[1:0-86 202:87-487]
AATTGAGAAGAAGCGAAACTACTCTAGCATTTCCAACCTTTCTCTTCGCTTTTCCTCTTT
CCTTTTCACTGCCAACACTAAGCGTCCTTTTCTTTGAGAAGAAAGAAAATGGATAGAGAG
AAAATGGGTAGGTTTTGAAATTTTCTCCCCTTTGGATGCAGAAAAGAGAAAAAAGAAAAA
AAATGATAGTAAAACCCACAGGAAATTTTTCTTCGCTCAAGTGAGAAGAAAACTGGGAAC
AACAGAAGTGACATCACAAATTTACTACATTACCCATTTTCCTTCTCTACTAAAGAAGGA
CGGTGGCTAAGCCATCAAAATCACTCAACACCAACATCAACACCAGCACAAAAAATTATA
GCCAATACCAACAGAGTTGTTCGATCGATTACGAAGGGGTGGGGGCAGGGGGAGTGGGTA
AGGGAATAGGAATTGGGAAGGTCGAGGGAAGCGATTGAGGGAGTTGGATGGGGTGGAGGT
AGGCGAGG
>comp1007_c0_seq1 len=692 path=[670:0-691]
TTTGGAGAAACCCCCGTAAATCAATGGGTTGGGGATGTGAAATATATTGAGTTCATCCTT
CTTGCCTGTGTACTTTTTGAGTTCTAGTTTTTAGCATTTCTGTTTGTGATGTGAGAATGA
ATATTATACTTCTTTTCTAAAATGGCTTTTGCTGAAATGTCAGTTTCCCTTTTCTTATCT
GTAATTGATTCTTAATGACCAATTCATGCAATGAGATGTGGGATTTGATTTCCAGTTTCT
AGTAATGGGGTGATTTTCAGTGAACCTTTCTGCTCATTACATAAATTTGGTCTTGATATA
CATGTGAGTACTGTATAAGGGGTGATTTGATTACCCTTGTCTTGTATAGGTGATATTGGT
TAAGAATATCTGGGTTTCTTCGTGAAACTCAGAAAAAAAGTACTTCCTATTTGCTGTTGC
TGCTTTTGTTTTGTGGTTTGTGCATCTGTTCTGACTGACATTCCAAGCCTTCTCCTTTTC
CGCTCAGCCAATTTTAAAATTGAAATGAGTTAATCATGTAGAATTGGAAATTTGTTATCG
GTGTTTTATAAATATCATATCTTTCATTAGATTTGGTGAAACATTTGATCGAGAATCTTT
CCGTGTACAAATGTAAATTCTTCAGTAGTTTCAAATACTCAATTTTATTCGAATGAAATC
TAATCTAATTCAATACAATATAAAGGGCCTTG
>comp1009_c0_seq1 len=415 path=[1:0-414]
TAGAATATGTATTAGTATATGGGCCTATCAATTTGGGCTAGGATTAGCATATGGGCCAGG
CTTGTGTGTATATCACCTGTAATTACTACTACCAGTTGTCACTTTGTATGTGAAAAGTTG
CAGCAGGGACAAATTACTACCAGTTTTGTGAAGAATGGAAAACAGCTAGCTGATATTTTA
CTAAGTCACTCACCCATAATCGAGTTGACTATATTTTAACAAGCTGGGTATGATTAACAT
CTATGGTCTAGCTTGAAGAGGAGTGACAGAATATGTATTAGTATAGGGGCCTATCTATTC
GAGCTAGGATTAGTATATGAGCTGGGCTTGAGTGTACAACACTTGTTCTCATCCTAATCT
AAATATATAATACAATAGTTGGGAGCCTAGTAATCTAAGTCAGCGCATCCCTGTT
>comp1009_c1_seq1 len=320 path=[1148:0-319]
CATATACTAATACATATTCTAACAATTACAAAATAGTTAAAATATCATCACCAGACAAAA
TATGCATGTGTCAAGTGGAAGCTGAGCCACACAATAGTTAATGACTATATAGTTTTAAAG
TTCTAACAAATTGAAGGACTTGTGAACCATAACTCAAAGCAAGATAAAGAGCTCTACTAA
AACAAAAACTGTTAACTCCATCAGTGTATAAAGCAGCAACCAGAAAGGCAATGTGTTAAA
TTAATGATAAAAATGTGACCCTCATATATATATATATATATATCACAAATACTGCCTCTA
ACTGCAATACATGTCATGAG
>comp1011_c0_seq1 len=633 path=[611:0-632]
GTGTAAAGAAACTTTACACTGACAATGGATAGAAATTAAACTCTTTCAACATAATCACAG
CCCATATAATTGTCTTTCAATCTATTACTTCTTTTAACTCCCCACTCCAGCATGCATTGG
CAATGTGGTGTCTAAACTTCAAATAGCAATAAGGTATATCTTCATATATGAAATATAAAG
TGGAGAAGAAAAAAGAAGTCTAAATGCAAGAGTGTTATGAACAATACAGAAATCAAGTGC
ACATGTAGACGTCTACATCTAAAAATTAGTGCACATACTTTAGGCCATTTCGTTTAGTGG
AGATTCTATCAGTACCCTTTGTTTTTATAAAGGTACTGGTACCTCTAATAATTAATGATT
AGTATTTAGCCACGTGTCCCACTTAGGTAAAATATAAAAATATAAAAATGTAAATAAAAT
AATTATATTTCAACTAGGTGGAACACGTAACCAAATATTGACCACTAATTGTGAAGGGGT
GCATTGCATTTAGCTTAAAAAGTTTAGTAAATTCCCTGAGGTCCAGGTACACAATTTGCA
GTTACTGCCGTATCAACTTTAGGTTACAAATTAGAAATTCCTTAAAACACAAGCATATCA
TCCATTTACCTTACAAATAAGTTCACCCTGAAA
>comp1014_c0_seq1 len=1210 path=[1:0-1209]
AGAATCTGCATTCAAAAAGCTAAAAGTTATGAGAAGAGTTAACAGAAGATATGACTAAAG
ATATACACTTGTGGTCTATAATATCTCAGAACAATTAGTGCAGCATGTACACTTGTCAGA
TTGCCTCTCATAGCAGTGATGTGATTACATAAAAAAATAAACTGAATCTCCAAGGAGAAA
ACTTGCAGTCAATTTGACGGTTTTGAAAGTTCTTTCTTGATAGCATGAGAATATGTCTGG
TGTTGATATTGGAGGGTAACATCCAACAGTTCATCAAGAGGTGTCCTTGGCTTCCAACCA
AGCTGCCTCGTGATAATTGTCATGTCAGGAATGCGTTTATCACTGTCATCGTAGCCTTTA
CCGTAGAAATCCTCTGAACTCACATTCAGAGTTGATAGATTAGAAGCAGATACGCCAGAC
ACCCTTGCATAAACCTGTATCATAAGCTCAGCCAGTTGCTTCACAGAAACTTCATTGTCT
GGGTTTCCCACATTAAAGATCTGCCCATTTGCTCTCTCAGGGTTATCAATCATTAACATA
ACAGCATCAATTGCATCCTTGATGTAAAGAAAGGTTCTCTGCGATTGTCCGCCATCAACA
AGTTTGAGCGGCTCTCCACGCAGGAGATTATTACTGAAGCAAGCTAAAACTCTGGGGACT
CCATCACTTGGGCCATCCACACCAGGAATGAAGTCCATTCTTGGGCCAATCCAGTTATAA
GGTCTCACAATGGTGAACATGAGGCCATTCTCCGCGTGCTCAGCATATATTAGCCTATCA
GTCATTTGCTTTGCACAGGCATAAGACCATCTCTGTTTCTGAACTGGACCAAAAATACAG
GGAGTGACATCTTCTGTGAGCATGTAATATTTGGGGTCCTTTCGATATTCCTCTGGGAGA
AAGCTACCTATAGTCTTCCCAAAGACCTCGCACGTAGAAAAATGGATCAAACGCTTATTG
TTCTCGCTACAATATTTAATCACCGGAATCGCATCAATGAAATTGCTGTAGATGGTATCC
AACGGGCGCGTGTTATAATCCGCCGGCGTACAAATTGCAGCAAGATTGATCGTGAGATCA
GAAGCTTTGACGAGGGTCTCGAGGCGGGAATCGTTCTTGATGTTGATGTGGTGGAACTCG
ATGCGATCAGCCCAGGGACGAGACTTGTCCAAGAGGTGGTTGATCTTCTCGGAGGAAACG
TCCACCACGA
>comp1015_c0_seq1 len=647 path=[625:0-569 1195:570-646]
ACTGATGTTCACAGAACAGTCCCTGGAAACAGCACAACAACCAATTAATTTGAAAAATAA
CACAACTGTGACAGAATAATCTGACAAGAAATCATGGGAACATATCCACAATGAATAAAG
GACAACATGGAAGGCAAGACAACCAATGACCAAAAAAAGCGGTGGAAAACAGGTCAAAAG
AGAGATAAAGAGAAATACTGTCAAACTCATGGCAGATTGATACATTCAACAATCGGGATT
CTGATTAAGTTAATCAGCCAATAATAGCTATAAAATATATGATGTCAGGGATGCATCACT
CATACAGATTCCTCAGTAGTATATTTTGCACCATCAATCAGTTCAGAAATTATGGTTGTG
GCAACTAGCAAGTCAAGAAATCTAACAGAAGCCAATAAACTGGAAATACTGCAAAGAGCC
TAATGGTTCTTAAATCATAGTAACTAAGATCTCATCAAATACAGTGTCAAAAAAAAAGAT
CTCATCAAATACCAAGGTATGAAGAAATCAGAGTTATCAAACACACAAATACTAAATAAA
AGTACACATCCCAGTACATAAACACACATACTTGTTAAAAGCATGTACTCAATGATAGTA
AGCATTGATATCATCATAAAATGCCAAGGGTATCATCATAAAAATGG
>comp1017_c0_seq1 len=370 path=[24:0-56 81:57-91 116:92-369]
GTAAGTGTCTATCTACCTTATAACTCTTGAAAACATAGGTTGCAAATGTTTGTTACTCTT
CGAAGTGACTTTTTATTTCTCTTTTTATGCCGTCATATCACTTGTTCTGGCCATGGCTTG
TGTATTATGCGACTTATTTGCTGATTGGCTAATTATCTTAATTATCATCTTCTTCTTTTT
TTGCCATCACAGCAGTGTTAAATTTTAGGCCCTTGTCTCTATAACTCTTCCCCTTAAGTT
TGAATGCCTGGAATTGAAGAAGTGAAGTGATAGATGAATTCTATAGAAGATGAGTTTCTA
TTAATTGTACAAGGCAACAGGACTTGTTACAAAATAACATTCTTGGTTGGTTTAATGGTT
AATGTTGGAA
>comp1018_c0_seq1 len=481 path=[1:0-480]
GCCCCCTCCATTGAAAAATCTCCCAAACAAAGTTAACAAACTATTTACTTTCCCTTCCCA
ATCTACTCCCTCCATTCCCCTTCCATCACACTGATCCAAAAAGGGTGTTATATTTCCATC
TTGTCAACATTTCGCAGAAAAACTTAACTAATCTTTCCGATTTGAAACCCAAATCAGATC
GTATTCCATTAAGTATAACATGAGCTCTTGCATACGATTGGTCATATACATGTGCACATA
TTGACAGTCACCTTGTGTATGTGGGATATTGAGGAGCAACGTTTGAATGAACCGTATGAT
TTTACATTATTTTTAGGCCTTTCTTTCTCCTGGACAAGTATTGAGTAATTTCTTTCTTTT
GGTTTTGTTGCTTTTTGAGTGCCACCAGTTGGAGGCACAGTTGTTCCGTGAATTATCATC
TTTCTATGTATAAAGTTTTGCTGACATTAAGATCTGCTAGGTTTTGGATGGTGAGATGTT
G
>comp1018_c1_seq1 len=392 path=[917:0-391]
GGCCAATGCGCTGATAATATTTATATTTTATGGTTACATTAAATCTGGCTCCATTAGGGA
AGTCCTATAGAATAGATCCTTGAGGACTAATGAGACCAATTTATCCTGGGCTTGTTTTGC
AATTATACGTGTTTATTGTTTTTTCCATTGAATCCCAATGTGGTATGATGGTTTACCATT
TAGGCTAGGCTTAGGAGTTTTGGAGGGTAGGGGAATGAGTGGGTTCATAAATTGAAAAGG
AAGGAGTGGGACTGAGGGAGGAGGAAGTATTTTTCTATTGTGTGGATGGAAATTGAAAAC
TGGCTACTAAACAATCTTTTTAATAAACCCACTCCACTCCTTACCACATGATATTTTTTA
AAGGGGTTCCAGCCCCCTCCATTGAAAAATCT
>comp1019_c0_seq1 len=1942 path=[1:0-1941]
GGCTTTATGTCACAATGAATGATTTGGGTGCTGCACTCTTCATGCAAATATGTGAGACCT
CTGGCGATTCCCAGAGCAATTTGCACTCTTTGATTCCAATGAGGCCTGGAAATCCCAAAG
AGAAAGCTTGCCAGAGACCCATTACTCATATACTCATAGACTAAAAGACGATGCTCCCCT
TCATCACAGTAACCAAGCAAACGGACCAAATTCCTGTGGTGGGTTTGGCCAATTACACTC
ACTTCTGTTTTGAATTCGTTTTCACCTTCTTGCACCACCTTATCTAACTTCTTGACAGCA
ACATATCTCCTGGTATCTGATGCTAAGACCCCTTTATATACTGTTCCAAAAGCACCTCGA
CCCAATATTTGTTTGAAGCCTCCAGTTGCTTCTTCAAGCTCCTTGTAAGTAAAGCTTCTC
ACTGTGGCTGATGTCAAGCTTGTAACTGACTGCAGATTTAACATCTTTCTTTTGTGCAAG
AAAAAGCAAACCCCAAGAAATCCAAACAATAGGAGGATATTGAGGAAAACTGAGCTCCCA
AGAAGAAATGACAAGACAAGCAATAGGGGGGACCGTTCTTTGTTATTCCAATCAACTTTG
CGAAACTTGAGGAGAGCTATTCTAGTAACACTTTCGCTTCTCCTTCCATTGCTCAGAGGA
TACTTCTTCTTCCAACAATGTCCCTCCCCACCAATTTGGTCATATATGGCTGCAGCACAA
AAGCAATCCTCACGGCATTTTTCTCGACACACATCCTTGTCAATTGCAGCACCAATCTGA
AGATCATAATCAGACAGAGGCCAGTCCAAATTTCGATACTCTTTGAAATCTACTGCATCT
TTATTCTGCTCCCACCCATCATTCTGGCAGCTTGGTAGTGGAAAATCTGGTCTACAACCT
GTTAGATTGTCGTGTTTAAAAGGAGAATAATGATCAGGGCACCGGCATTCAGTTTTCCCA
CCTACAGAAACACAGTAGCTGTTAAAACCGCAAAGAACATTCCCAATTTCCTCGACAAAT
GCAAGACAAATATCATCAGGAGTTCTTTCCAATTCATTCCACCCTGAACTGCAGCTGTGA
TCAGCACCTCTGGTCTCCGTTTTCTTGTAACTATATAGTCTGAAAACTCCATCAGAATCA
ATTCTAGCCAGGTAGTGGTATTCTTTTGATCCAGGTATACCCCTTGTGACGTTGTAGATT
ACTGTGGTGTCATTTCTGATGTAAATGTGTCCAAACTCATTGAAGATCACCTGTGACGTC
CCAGAATTGAAAGTTCCACCTGACCAGTAAGCTTCAGCTTTTTCTTCCGTTTTGCTTATT
GATGATTTTGAGTTTGGTAAATAGGAAAGAACCAATTTGCCATCAACCTGCCAACTGAGC
TCGAAATTCCCATCAGAAAAACTTGTGTCCGATTGACGTGCTTTCAGAATAATCGGCTTA
TTCAGATTCTGGCCAGGCAGAATTGTATCAGTGGGCTCTTCAAAACTCTCCCAAACAGGT
TTACCATTATCCAGAAGCACAAAATTTCCATTATCTTGCATAGAAGCACAAGATACGTTC
ACTTTACTTTCTGGACGACGCCACCTTTCATGGCCTTCTGGGTCATATATAGCAATTCCA
TTGTTTGTCAGCTTGACTGTGGACCCCACAGCCACAGGAACTGCTGGATCTTGTTTTGCA
TACCAAACTATGGTTTGATTGGGTGCTTTTGTAAACCAAATGGCAAGAAGGGGCATGAAT
CCTTTATCGTTGAATTGAACATTTCGAAAACCAAAGGCAAATTCCCTAGATAGTGAATTC
CATGAAGATGTGCCATCAGTGGATAGAGGGGAATTTAGCTTTATACAGTCTGAATTAGTA
ATGCTAAATACAAATGGGAGGAAGAAGGGGAGAATTAGAAGCAGCAGAGAATTGAAATGA
AGAAAAGTTGAGGAGGCCATTG
>comp1019_c1_seq1 len=662 path=[4478:0-661]
TGACATAAAGCCTCAGAACATACTCCTAGATGAGTTATTCACGCCTAGGATTTCTGATTT
TGGGTTAGCAAAGCTGTTGTTGGCTGAGCAAACTCGAGCAGCTAGGACAGGTTTGAGAGG
CACGGTTGGTTACTTTGCACCTGAATGGTTTTGGAAAGCTTCAATCACAACTAAAGTAGA
TGTTTACAGTTTTGGCGTGATGCTGTTAGAGATCATATGCTGCAAATCAAGTGTCTCCTT
TGCAATGGCAAGTGAAGAACTGGTACTCATAGATTGGGCATATCATTGTTATAGCCATGG
AAGATTAGCTAAATTGGTAGAAAATGATGAGGAGGCAAAGATTGACATGAAGAGGGTAGA
AAAGCATGTGATGATTGCAATTTGGTGCATTCAAGAGGATCCTTCACTTAGACCATCCAT
GAAGAAGGTTATCCAGATGCTTGAGGAAGTTACTGCAGTTTCTGTGCCACCTCGCCCTTC
CATGTTTAGTTTACCATCTGAAATTTCATCTATGTCGTAACTACTGAGCATTTTCTAAGG
TTGTAGTTATTATTTATTTTATTTTATTTTGTCTAGCTATGACTACTTGTTCTATACTTA
GAGATCGTTTTATAGCGTTGGTTGCATGTTTGGCTTTGAGTTTATTTAGTTGTAAAAATG
GG
>comp1021_c0_seq1 len=510 path=[488:0-509]
AACCCACCTCCCCCCATGGGAATGTTTCTTGGCCAAAACATGGGAATATTACAATCTTGA
GAATGATAAATTCCCAGGAATCCTGAAAACATTCCATGAACCAAATGCCTCCATAATGAA
ATAAGGAAAATATAATGAGATAACCAGAAATTTGTCTTGTGAATTCTCTATTCCTTTGTG
CAACGAGTATACATGTGAGGAAGAGGAGCAATAGGAGTAGGAAGAGGTCAAAGATAGTGA
CAAAGAAATTTGTTGGAGGAAGGGAAACAGAAGAAGCAATAGAGAGGAAACTTATACATA
ATCATAATCACTAGAGGTAGGCAGAGTAGGTGGCTCTAGGAATAAGGATTAGACTCAAAA
AAGTTAACATCGGCAGAGATATCTACCCAAGTCAGGTGAATAACAACAATAACTAGTGTA
GTGGGAATCTCAATTCGATTCGCAAGTCACCCTCTGAGGTAGTCAAATCGATAAGTGACT
CCTTTTTGTTGAAACCAAATTTTTTATAAA
>comp1022_c0_seq1 len=383 path=[789:0-382]
AAGCGGCGCTGATCCAACCTGGCTCTGATGTCACTTGATGTAGAGGAGAGCCCCCTTCTA
AAAGCTCAGATTGGAGTTTCTTTACTACCGATGAATAAAAGACCTTTCTTAATCAATGAA
ACACAATTTCGGAAAAAGAAATTCATGAATTTTTGCAATAAATAAGTTCAGCTTGGTTAA
GGGAGTTGCATATACCCTCAAGTATAATGTTGCATATTAGTTAATAGTTACATTGGTATC
TCTTTAAATCTAATGTCAGAGATCAAGCTAAAGGAGGTTACTATTGTCAATGGATTTACA
AATCCGATAAACAAGGAAGAGTTGAGACTTGCATGTGAAGACTGGCATTTCCTTATATGG
TCAAGCTTTTTGTCAATTGAAAT
>comp1026_c0_seq1 len=357 path=[1:0-165 167:166-356]
AGTTGCTCATTGTTACCACCGCCTGGTTGAAAATGCCATTGACAAAAAAGCAGGTGATTT
CATTACATGAAAGGTTACTTTTTAATTAATTTGATTAAATCCATTTTACTCGCTGTGCAA
TAAATTGCAATGCTAGCTGATAATACTGTGACATTCTATCTATCTTAGTCTTTTTATTTG
ATCTTTCAGTGCACCCTTGACAACTAGGTCTAGCATTTGTTGGAATTTTGTGTGGCCTAG
AAAATATAAAACAAGTAGCTATGCAGTTTTTACTTACCACATAGCCATCTGGTGTCCAAG
CCACGACATCCCATTTGATCGTTCCGTTTCCATTTGCATCCAAAGGGTCATACGCAG
>comp1027_c0_seq1 len=436 path=[1:0-435]
AGAGTGTACTTATTATAACAACATTTCAAACCAAGACAGGACATGCTTGATCATTCATTT
ATCAAGAAAATAAGCAAAAATAGGAAGTAGAAATGCATGAACTCTTCCAATGACAGCATG
GCTTCAAAGCCAAATACAGCAAACAAACACATGAAATTGAAAGTGATTAAGACACGAAAC
TGAGCATTGCAATGACAGAAGTATAAACTCAACCCAATCTTAAAAAGAAACCTGCGAGCA
AACGTGTATGGAGTGTGCAAACTATGGCCATGCCTAACTCAATCACTTCCACAGCAAATC
CAGCATTAACAAAAGCTCTTTAGACAAATAAGAAGAAACACAGATAAATTCAATGCAAAG
GCCGTACGAGTCAAAGCCCAATAAACTACATTATGGATTTGCCACCCAGATCATTGACCC
TAACCACTAGTAAAAT
>comp1029_c0_seq1 len=710 path=[99:0-660 73:661-709]
ATGGAAATCAACCAATTTATAAATATAGTAATTAAATATGAACCTTTTATATTAAAAATG
ATGTTAATTGCTAATAATGTTAAGTAAATTATCTGTTTTATATATTCTGGCTAGGTGAAC
TGGGAAAAGGGTAAAACATATTTTAACAAAACCGAACCCATCACTGGGGGCCGGCCTACA
CAAAAGCCTAAAGCCTAATAACTTCGGTTGCCTCCCCAACGTTGTCCAGAGGCAACCCCA
GCCTCCTTGACCAAGACGGGTTTCCATTTTTTGAATAAAATGTGTGTATACGCATGGTAT
GAGATGAGTTCTTAACCTTTTTTCCCCTTTGAAAGGTATGCTTTCACATTATAATATGTT
ATCTTGACAATTTATATCATTGTAGCTCGGTTGAGCTCCGAGGAAGAAAAAAAAAATGGG
GCGGGTTTCACTCTACTTGTGTTACTTAAGTAAGACAAAGTAGCACAGCTCTACTTCTAG
ATAGGGGATGTGACTATGCAATGGATGAAGTTATGATGTCATATGTTATAAACGCATCTT
TCTTTGTAACAATAATGAAACTCATTTGAATATGAAATTGCATACATTTAGGAAAATCCT
CATTTAGTTCAATTCTCACTCATTTATTTTAGGTAACTAGTTGTTTAAACCGTCTTAAAC
AGTTGCTGATAACACAAATCATGTGTAGGCAAGAATTCTTTTTCATGGGA
>comp1030_c0_seq1 len=593 path=[1:0-39 41:40-166 168:167-592]
AACTTGTTTTGGGAATTTTAGGGTAAGCAATGATATATAACAACCCAAATTGCTATGAAT
GCCTGATGCCTGATGATGCCTTGTATACATAGTTTTGCGAAAGTTCTTCTTTTCACTGTG
TGGATTGTCTCTTCCATTTCCCTGCACATGTGACTGTGAGGAAGTGATTTGGTATACTGT
TGGACATATTTCTCACACTGAACTACATATTTGACAATTTTCAAAAGGTGTTTAAGAGAA
GAGCCAATGTGCTGGACTAAATTAAAACTGGAAATTCACAACAATAAGAATCACAATGAT
CTGAAAAGGACCTTTGTATTCAAGCCTTCAACTTCGTCTAAAGCATGTCATTGTTGGATA
GAGAGAAGAAATGAATATGATGATGTAACGGGTAACAATCAGCATTACTTCTCTATATAG
TTATAGAAGGAATGCTGATTGGATGGCTAGTTCATGTTGTGCTAGGTTTATTTCTGTTGA
ATGCACGTTGCATTTGATACTTTTCTTGTTATTTTAACCACTGTTAATGGTTGGGAATGT
GGAGGGAAAATGGTTTCTTGTGTTATTAGAGGAATTTTTTTGGGTTAAAAAAG
>comp1033_c0_seq1 len=447 path=[342:0-339 861:340-446]
ATTCGCAGGAGGAATCTGTACCAGGCATGTTTTTACTCATTATTTTTCTGTGATTAAATG
TGGCATGCACTAATTATCTATTGAGTAGTGATATTTTCTCAAACTGTTCAGCACAAACTC
CAACAAACTGTCGTGTGGCCAGGGGTGGCGCACGGTGCAAGTAAAAGGAGGCTTTGTCCC
CCTCCCTCCCCAATTTTTTTTCTTTAATACTTTACATGTAATGTTCTTTTTTTTTCTTGC
AAGGATGCCCCCCCTCCTCTTCTCCCGCAAATTATTAATTTTAACCTACCTAGCTCTGCC
CCTGCATGTGGCTATATCTAAATTCTCCTACAGACTAAAAGTTTGTGTAACTAACATTAT
TCTTATCTATTCAATTATTATTTAGTATTGCTAAAGCTCAGGAAGTTTTTCTATTCTGTT
TTGCAGTTCTGTAATGAGTATGCTGTA
>comp1034_c0_seq1 len=1005 path=[4613:0-1004]
TATGTATGCAAAATGTGGAAGCATAGAGGATGCTAGTCGTGCCTTTTCTGAGATACCTAA
GAGAGGAATAGTCTCGTGGTCTGCAATGATTGGAGGGTTGGCTCAACATGGCCATGGTCA
AGAGGCTCTTCAGTTGTTCAGTCAAATGCTTAAAGATGGTGTGCCACCCAATCATATTAC
TTTAGTTAGTGTTCTTTGTGCATGTAATCATGCTGGTTTGGTAAAAGAGGGAAAACAATA
TTTTGAAACAATGGAGGAAATGTTTGGGATTAAACCCATGCAAGAGCATTATGCTTGCAT
GATTGATCTCCTCGGTCGATCAGGGAAATTAAATGAAGCCATGGAGCTTGTAAATTCCAT
TCCATTTGAAGCTGATGGCTCAGTTTGGGGGGCACTTCTTGGAGCTGCAAGAATCCATAA
AAATATAGAAGTTGGTCAGAAAGCTGCAGAGATGCTTTTTGCTCTTGAGCCACAGAAATC
TGGTTCCCATATTCTCCTTGCAAACATCTATGCATCAGCAGGGATGTGGGAAAATGTTGC
AAAGGTTAGAAAGCTTATGAAAGACAGCAAGGTGAAGAAGGAGCCTGGAATTAGTTGGAT
TGAGATCAAAGACATGGTATACACCTTCATTGTTGGAGATAGAAGTCATTCTAGAAGTGA
TGAAATATATGCTAAACTGGATGAGTTGAGTGGCCTTCTAAGTAAAGCTGGTTATAGTCC
CATCATAGAGATTGATATACATAATGTGAACCAAAGTGAAAAGGAGCAGCTCTTATATCA
CCATAGTGAGAAACTTGCTGTAGCCTTTGGATTAATTGCTACGCCACCTGGAGCCCCAAT
AAGGGTGAAGAAGAATCTACGAGTTTGTGTTGACTGCCACACCTTTTTCAAATTTGTATG
TAAAATTGTTTCAAGGGAAATTATTGTCAGAGATATTAATCGATTCCACCATTTTAAAGA
TGGATCATGTTCCTGTGGTGATTATTGGTAACATCATCAAAATGG
>comp1034_c1_seq1 len=1838 path=[1:0-1837]
TGCTTCCACATTTTGCATACATATTAACCAGAGAATTGCTGGCAAAAATATCAGACATAA
ATCCAAACTTGATGGCATGGACATGTAATTGTTTCCCTTGCTCATACGCAGACAAATTGG
CACAAGCATTTAAAAGAGAACTACAGACAAATGGATCTGGCTTAATATCTGCAACTTGCA
TTTGCAAATATAGCTTTAAAGCCTCTTCCCCATTCCCATATTGAGAATATGCTGTTATCA
TGGACGTGTAAGCCACCAAATCTTCCCAAGTGCGTTCTTCAAATATTTTTGAAGCTTCAT
CTATATGGCTACATTTTCCATAAGTGTCAAGAAGACTGTTTATGACATAGAAATCTGAAT
AAATCCCAGATTTGATGGAAAGTGTATGAATTTGTTTGCATACCTTAATTGCCTGCAAGC
TAGCCACAGATTTGAGGACTGTTGATAAAGTAGTTTGGTTGAAATCTATATCTTCATTGT
ACACTTCACAAAAAAGTGAGACTGCTTCTAAGTCATCACCACACTGTGAGTAACCCGAGA
TCAAAGCATTCCATGCGATGATGTCCTTCTTTGGCATCAAATCATAAGCTCGTCTTGCAT
TATCCATCATTTCACACTTGGAATACATATCTATTAGTCCAACAGCGACAAACAAGTCCG
AATCAGTATCCATCTTTATCAAACTAGAATGTAACTGTCTACCCAATTCCTTGAACCCCA
TTGAAGCACAGGCCTTTAAAGCACTTGATAGGGTAAACATATTGGGACAAGTTCCTGAGC
TTTTCATCTCATCCAACAGTATCAAAGCCCAATCATTACACTCATGAAGAACACAACCAG
CAATAACTGCATTCCAAGAAACAATATCAGGGTGTGTAATTTCTTGAAAAACAGCAACTG
CATCTTCCATCGCCCTTGCTTTTGAATACATGTCAACCAAAGCATTTGCAGAAAATTGAT
CTAAATCATGCCCTAGCTTTAGCAAAAGCCCATGAACTGTCCTTCCTGGACCAGCATCCC
GCAACCCGGCACAGGCATTCAATATGATAGAAAGGCTGTACTCATTAGGTCTTATTCCAC
TCTGAACCATTTCTTTAAACAAATCTACTGCTTCAATATAGAAATGACTCTGCACATAAC
AAGAGAACAACGCATTCCATGAAATAACATTTCGTTCCACAATTGTGCCAAACAGTCTCC
TAGAATCACCCAGCTGCCCACATTTTGCGTACATAACAACCAAAGTATTTGCAACAAACA
CATCAGACTCAAACCCTGTGACCACCGTCATCCCATGAACCTTCTTCCCCATATTCAAAT
CCTTCTTGATTGAGCATGCCTTAAGAACACTAGGGAATGCAAACTCATTGCATTTAACAC
CCAACACGCACATTTCATTAAATGCTAAAATGGCTTCTTCCCCAAGCCCATTTTGCGCAT
AACCAGATATTAAAGCAGACCAAGAAACCAAATCTGGTTCAGTACTTTCTTCAATCAACT
TGCGGGCATACCCAAAACGCCGACACTTAGAATACAAATTTACCAAATGATTCCTAAGAC
TTGGGTCGCGAGAAAATCCAAACTTGATCAAGTGGGCATGGACTTCCAAGCCTGAAGTCA
CGGACTTGGAAGCAACACATTGCGATAAGAGATTGGAGTAGGATATGGGGGTTATTGTGA
ATGTGTCGAGGCGGTGTGAGCTTAAAACAGCAGTGGTTTGTGAATCTACGCTGCTACGTG
CAGAGGTTTGTATAGTTGGAGGTTTAAATGGCAGGTAAAGGCGTTGGAGAATAGGGTGTC
GCAGGAAATAGGTGTTCCAAAAGAAACCATTGAATCGA
>comp1038_c0_seq1 len=620 path=[598:0-516 1218:517-563 1162:564-619]
ATGCAAATACTGTCTTGGTACTGGTAAGATTTCAGAGCCTCACCTCTTATCTGCATTTTA
GGAGTTGAATTTTTGAATGGTGGAATTGAAGGCTTTTGTCATTCTTCTCTTGGCCTCCTT
TCCCTTTCTTAATGCACATTCTTACTACTTTCTACTGCTAAGGAGGTGGTGAAGCAAAAC
CTTTTTGTCTATTGCAATTTGAAAGGGAAAATAAAAATCACGGAACCAAATGAAGCTGGC
TGGGTTCTTAACTTTTTGTATCATTCTGAACTATAGTCAATCTTTCTTCACAATAACGGA
TAATTCTCCTTATACTTTCTGACTCCATATATGATGAATTTTCCCCTATGTAAGCGTCAA
AGTGGGACACTTCTACTTTCTGTGATACCTCAGTTGCAGAGGATTGTTGCATAGGATGCT
CAGCTGAAGTCCTTGTTAAACATAAAGCAAAGTCGAGGAACTATTAATTGGCTATCACTC
AGCTTTCATAGGGTTGTCATGTTGACAACCAAGTGGAGATTTTAATAATGTCTTGTTATC
TGGTGAAGTTAACTGCAAGAAATCTGACATACCTATTATACTTTTGCTCTCTGTCAGGAT
ATCTTGCATGCGCTCGCTGT
>comp1041_c0_seq1 len=680 path=[25:0-679]
TCTTGATCTGCAATTGGTTTGGTAAGAGTTTTGAATCCATTTTTTATTTGGCTTTTTGGC
GAGGTGTATGATAGCATGTGGTTTATTAGTTGAAGCATGAGCTTATTGTGTTATATTGCC
TTGTCAAAGATTGAATATATGATCATTGATTTAATCTCTAATATTTTCCAAACGAAATAC
ATTTTGATTTTAAAAACAGGGTCAGCCCCTTGAATGCAGAATCCTTGTAGGACTATAACA
TCTTGTGAACCTTTACTGTTTAATGTTTGAGGCAGTTAAGCTTTCAGAGTTAAAGGGTAT
ATGCAAATTGTATGAGAAATGGTAAATTATTGTTCGTATGAAAAGTCACAGACCTTTTTC
CTGTGCCTTGAATGGCACTTATGTTACACTTCCATCTAATCCTCATTATGCACTGAAATT
TCAAAGAGTACTTGTACTTGCTGAGGGTTATGTTTGTTCTTAGGATGATATGCAAGCCTA
TAATTATATACTTCATTTAGCATGAATTTAATATTATTTTTCCAAAAAGTTCAGTTGTTT
TAATATATTTGAATAATTTTGTCATACCGGAAGAACTATGTGCACCTTAATGGTTCTGTT
AGGATCACTATTCATGGTTCTCGTTGAAATGAACTAACTCTGTGGTAGTGTAAACTCTTG
TTCTGAATTTCTTAAAATTA
>comp1045_c0_seq1 len=866 path=[1:0-865]
GAACAAGTTAAAATGATATTCCAGTAAATGTGTCATACAATAACTTGACTATATATTTTT
CAAGGAAATTTTTTTTGAATGATGTTGCAGGTGCACAGAAACTTTGAAATCAGTGTTGTC
AATGGTGACTGCCATGGTGGTTAAGGGGGTTCCCGCCAAAAATCCCACATGGAGTGGCAT
CTTCAAATGGTGATGCCATGGGTGTGGTGGCCGTCAATTATGGCACTATGGCAACTGCCA
GAGTGTAAGTGGCAGATTTTTGCATATTTAACCCCATTTTTCTCAGTCAGCCAATGCCAA
ATGGGCTTGTGATTTTAAGTGTATGCCTTGTGAGTAAAAATAACACAAGATAAACAATGC
AGAGAACTCTGAAAACCAAAACACAACACATCTTTCGGGCTAGACAGAGGCATCTTTACT
GATTTTTTTCTTTCTTGAATTCAATATACTATCCCAAAATCATCTGAAGTACTTGTCCTC
CAATTTCAAGCCAGTTTCATTGGACTTTTTTAACAATTTCTTCTTAAGCTGTGGGCACAC
CTCTTCTCTCTTTTTCTTCTTTCATGGGTGTTTGGTATCAGTTGAAATATAGTTCAGTTT
TGTAATGATTTTTCATGATATAAGATATTCATACTTCTTGCTCACCTTCTACAGATTGAC
TTAATTTTACTTTGTTTAAAAAATTGCCAGCTTGCTTCACTATGGCAGCCACCATACCAT
CTGCCATGCTGCCTTGGTGGTTTTGAAACTTCCCCCATTGGCCAACATACACCATTGACG
GCAGCATTTGAAAATTGAAATACAACTAGATACATAGGTGGTAATGAGCGAAAATATATG
ATACCTTTCCCCACTCAGAACCAAGG
>comp1046_c0_seq1 len=424 path=[1202:0-423]
GGGTGGGGGCGCATTTTCTGAGGAGCAGTCTTTAAGATTTAGTACCACATGTCATGATGA
AAAGGCAGGACAATCAATTCCAGACGGACTAGACCTAGATGCTCTCAATTTCAAATATCA
CCATATTATAGAAAGGTGTCAAAGGAAGGAGAATGCATATGATTTTAACTTTCCCCGACA
CTGAAGAAATTCAAGATTTAAATCTAAACAACTCCCCACCCCGTGCAGGGGATTGGCCAA
TGAATTCAGAGTCAAATGGTACTTCCTTTCCCTTGAAGAGGAAGAAGGATGGAAGTTGCA
ATCACAGATCCATCTGCTAGGGTATATATGTCAAAAACAGAAAAATGTGCCTGACAGATA
TAACTGACTTGAGAGATCAGCTTAGTTAGAAATACATAACAGAAAAAAAAATGTTCTAAA
CAAC
>comp1046_c1_seq1 len=411 path=[1:0-410]
AAACGAAAAAAAAAACTCTTTTTAGGATGGGGATGAGGGTTTGTGGTTTCCATCAACAGA
ATTTTTTTGTGGTATGTTGTATAATTATGAATATATTGTGATCATGATGGCGGATATATT
CAATTGTCAAATATTACAAGGTGTGAGCCTGTGTCAAATTTAAAGTGAAGAAAGAAAGAG
TTGGAAATTTTAAAACCTTGTTAGCATGCGTGTCCATTCTCAAAATGTTACTTGAAAGAA
AGATTTGGAATTTTTTTATCTACTAATATATTACCCAGCACAGATCCCAATAATGGCAGG
CATTTGTTGAAATGGAATAAGAAGCAGAGCATGGTTGGGCTTTTCTTTATTCATATGAAT
AACTGTGAGTTTATTTGTATATGCTGTAGAAAGAAGAAGAGTTTGTGTTCA
>comp1047_c0_seq1 len=827 path=[559:0-826]
TGATACGCCAAAAGAGATTGCTGATCTGCTAACTGCTACATTTGATGGCATGGTGAGCAT
GAACAACATTTTGGCTCAGAACCCTTCATTCATAGATGTGGGTTGGGTGCTATTTGTTCC
CAAGGAATTGAAAGGGCTTCCACTCCCCAACAGAAAAGAAAAGAAACACAAGTTGGTGGT
GACAATCATTGGCATCTTAGCGGGTGTGACATTACTTTCAATTATTACAATGATCATTCT
CATTCTCAGGAGAAATAGAGCCTATGAAACCAGCAAAGATGATCCAAACGCAGTCTCTAA
AAGATCAATTTCCAATAGAACTATTTCCATAAAGAACCCCAACCTTCATTATATGGAAGA
TGCAACCCAATTTGAGTCAGAAAGACCAGTAATTTACACTCTTGAGGAGATTGAAGATGC
TACAAATAACTTCGATGAAACTCGAATAATTGGAGTTGGTGGATATGGGAGAGTGTATTT
TGGAATGTTTGGGGAGAAGGAGGTTGCTGTGAAGAAGATGAGGTCTAATAAATCCAAAGA
ATTCTATGCAGAACTCAAGGTTTTATGTAAGATCCATCATATTAACATTGTGGAGCTGTT
GGGATACGCCAGTGGAGAGGACCACCTCTATTTGGTGTATGAGTATGTTCCGAATGGATC
TCTCAGTGATCATCTTCATGATCCCTTACTGAAAGGTCATCAGCCTCTTTCTTGGAATGC
TAGGGTTCAGATTGCACTGGATGCTGCAAAAGGTCTTGAATACATACATGATTACACAAA
AGCACGATATGTGCACCGTGATATAAAAACTAGCAATATTCTTCTTG
>comp1047_c1_seq1 len=302 path=[280:0-301]
AAACTAGCAATATTCTTCTTGATGAGAAGCTCAGAGCAAAGGTAGCAGATTTTGGACTTG
CAAAGCTAGTAGAACGAACCAACGATGAAGAATTCATAGCAACAAGGCTTGTTGGAACAC
CAGGCTATCTTCCACCAGAATCTGTGAAGGAGCTTCAGGTGACACTAAAAACCGATGTGT
TTGCATTTGGAGTAGTTGTGTCAGAGCTGATAACAGGGAAACGTGCACTATTTCGTGACA
GCCAAGAAGCCACCAAAATGAAATCACTTATTGCAGTTGTTAACAAAATATTCCAAGATG
AT
>comp1050_c0_seq1 len=543 path=[521:0-542]
GGTCAACATGCCTTTCAGCCGCTTTGTTGAAACTGGCCGTGTGGCCTACGTGTCCGATGG
ACCCAACAGAGGGAAGTTGGTCGCTATCGTTGACGTTATAGATCAGACCAGGGCATTGGT
GGATGGGCCCGAATCCGGAGTCCCCCGCCAGGAGCTCCGCTTGAACCAGCTTCACTTGAC
GAAATACAGGATTTCTTTTGCACACTCTGCTAGAACTCGTGTAGTGCGTAAAGCTTGGAA
GGAATCCGAAATTTCTAAGAAATGGGAAGAGAGCTCATGGTGCAAGCGAGTTCAAAATGT
TGCTAAGCGTCGCAGCCTTACCGACTTCGACAGGTTCAAGCTCCGTAGCGTTCGTAAACA
CCGCAACCACCTGCGCACTGTGGCATACAGGAGGTTGACCAACAAAGGTATCAAGGCTGG
TTTGTTCAAGAAGAGAACAAAAGCAGAGTTGGCCAAGATCAAGGCAGAGTCTGCCAAGAA
GGGTGCTGCAAAGAAACCCAAGGCTGTAGCCAAGAAGTGAATGTTCAATTAAATTTATAT
CGC
>comp1051_c0_seq1 len=343 path=[321:0-342]
ATAGTGGCGCTTGGTTTCCTTGAGTAAGGCTCTTCAAACCCTTTCCACCTCTCAATATAT
TCGCAGTATCGAATCGTACATTTTGTTTGTTTCTTCTCAGTCTCTTCATGGGCCCTGTGT
GAAAATATTTGAAGTACAAATGCATGCATGCATTACTAGCTAGCTATGCCTATAATATAC
CCTTATCCTTTATATATTCATTAATTACTGCATATATATGATAAATATATATCTTGCTTG
TTGGGAACACCCCAACTATGTTTTAAAAAAAACCCGAGGTAGATGTGTTTTTCGTTAATT
CAGCTGCTAATTGGTTCTATTCTGCATCTTACTGAAAGCCAAT
>comp1053_c0_seq1 len=391 path=[1:0-390]
AAACCATCTTCATATTCTGTTGACTAAGCTATTATATTGGTTGTGAGGAATATTATGTCT
TATTTGCTAGGGTGTCTAGTTCCTTTTGGGTTCATCACTACCACACCTATGAGTGACCAT
TATTTGAAACTTCTGTATTGGTCAATAGAAGTCTGATAAAAATTTGGAAGTGGTCATGAA
TTTCCATTTTTGTTTATCTGTTGTGGTAGAACAAATAGCAGGTGTTTTTGCTGTTAATCT
CCTTGCCAGGGTTTTAAATTGTGGTCTGCAACCGCAAATGCGGCCACAATATTGCGGTTT
TGGAGGTCTCCGCAACCGCAACGCAACCGCAATTGCGGCCGCATCAGCTGCATTTTCCCA
CAATTGTCCGCAATTTATACAATCGCAACGT
>comp1053_c1_seq1 len=352 path=[737:0-351]
GTTAGTTATTCAGCTTTCTTGTCAACGTATCTGATCTTGTACTCTTGTTGGCTATATATT
ACAAGATTATGAAACCAGGGATTTAGTCATTTAGATGAGTCAGGCATATTTTAGCAAATT
ATGGTTTTGTAAAATCTTCTCCCCACCCCTTGAATTTTGAGTTGTCTTTTCATTGCAATT
TGATATTGGAAGAATCCTGTAGAGCCTCATTGGTTTAAAGATGAATTTATATCTGCAACT
AGCAATCTGTCCTTAGGTGTTACTGCCAGGAATTTGCTTTATAAGTCGGATCAACAGGAA
ACATTAGTTAAATACTGCCTAACATTAAGAGAAAACCATCTTCATATTCTGT
>comp1055_c0_seq2 len=713 path=[1:0-222 224:223-312 314:313-712]
GAACATTCTTGATGTATCAAGAAGAAAAAAAATAGAAACTCTTCTTCATTAGCCGACTAC
AACCTGTAATAGCAAACACTAACATTCAGATAAGCAACTTTCATAAATAAAATGGTCTTC
CAAGCTTTTCTTGTGTACTTTCATTAACAGCTTGCCTATTTATTTTTGTATGAGTGACTT
CCCATAAGCGGAGTCGACCAATTTCCTTCCCAGTCTTCTCTTTCTACCATTAAGAATAAT
AAAACATACATCCAGAATTAGAAAAAAAAATGAAAACTTTAAACTTCATAAAATGTTATG
TACACATTGATACCTCTTCTTCTGCCTTTTGCATAAAACTTTTTGAACCAGAAGTGTGAC
AAATGACATTTGCTACTTGATTTGCCTTGTTTTGTTTGCTTACTTTCTACACTTCATATT
ACAAACAGAAACAAAGATGAAGTCGTAATACTAATAAAAAAAGTATTTAGGAAAAATCAT
TATTGCAATAACCCTAAATCTCTATATACAAACTTTCTAATCAGAAGAAGTTCAAAAATT
TACAAGGTAAATTCAATCTTCTTTTTCAATGTCCAGTGGAACATTTGCACATGCCTCATT
TGGTTTCTCATATGGGTCAAAATAAAATCTCTTCAAATTAAATCTATAATTCTTGTAGGA
TTTATTTAGTTGAGCCCACACCCACAACATATGATGTTCAACTTTGAATTGAG
>comp1059_c0_seq1 len=548 path=[1:0-110 1115:111-130 131:131-547]
AATGTGAGTTATATAATAAAAAGACAGGTATTTTACCCACAGAACAGCAGCTTGAACCTG
GAAACATCGTCCCATGATCCCAAACACAATTAAGTGCTACTTCCTAACTTTGTGGCACTG
CAGATGAAACGGTTTCGCAATTGTTCTGGGACTATCAGTAAGCATAGATTGTGTTTATCG
TTGCTAGCCTTTATGTTCATGATGGCACGGGTTTGGATGTTCCTTTTGTGCAGCTAGAGA
GGATTTTCATATATCAGTTTTTAAGGTGATGCTCATAGATTTGCTGCTCTACTCTTACAT
CGCTGGATAAGTACCTTTCTCTTCGTGGACTGGCTGTACTTGTACAGGCCTTGTATTATA
GCCAGATCTACTTTAGTTTTGTTCTGTTTCTGTAGTTCATGTTGCTCGTTTGTTTAATTC
TGCCATGGGAACCTTGCAAAACAAGGTCTGCTTTCTTACTACTATATTTTTGTTACGCTG
GAGGATCTCCCTCTGTTGTCCCCCAAATGTTATGTATGGCAGTTATAATTTGAATGGTTG
AGTTGAGT
>comp1060_c0_seq1 len=819 path=[797:0-818]
AAGAGACGAGGGCAGATATATTGGGCAAGTGGGTTGCTGAGAAATAAGAGATTTGAGAAC
ATTCCAGAAGAAGCCCAGGTCATGTATGAATACAACATTGTCTCTAGTGAGGACGAAGAG
TCCTTCAGTTACACAAGTCAAAATGATGAATCACAATGGGTGCTGTATCATACTGGTCAG
CTAATAGATACAAGAAGAGGAAGTGATATTGCTAGAGCTGATTCATGTTATGGCTACAAT
ACTGAGAATGGTTGTCAAAGATGGGAACAACCCACATGTAGGAAACCCGGTGATAGATTC
GAGATTAGGTTCGGATATTTTGATCATTCATCAGTGACTGGTGATTTTGTAGAAACAGAA
GACAATACTAGTCTAAGTGCAAGTGATTGTAAGGCTAATTGCTGGACCAACTGTACCTGT
GCTGGGTTCACAACTTATTTCTCTAATGGGACCGGATGTAAATATTATCATGGGACTTGG
GAGCGAGCTAATTTGATCGCTGCTGATGAAAATGTTTACGTTCTAGCACGGAAGAATTCA
CATCATAGAGATACGAAGAAGTGGATTGGTGCTTCTATAGCAACAGCTCTAGTAATAATC
TGCCTCGGCATTTTCTACATAACATTATGGAGAAGAAGAGCTGCACTTGAAGAGAAGAAG
AGAACCAGAATTGAGAATGAAATGCTTAATTTAGAGGCTTCACCTAGATATGAACTTCAA
AATGAAGTAAAGAAGGGGAGTGATTTAAGAGTTTTCAGCTATGCCTCAATCATGACCGTG
ACAAACAGGTTCTCAATAGAAAACAAGTTAGGAGAAGGG
>comp1061_c0_seq1 len=351 path=[1:0-350]
ATTGAGGTGACTAACTTCCATAATTAGAATGTTATGTATTTGCTTAGTAATCAGTATCTT
TAGTTGTCACTATAATACAACTATCAAACTTACAAAATAAGCCACTGATGCCAAAAATGC
AATTTGCATAAGGTACAAGCTCCCTTGGAGCATTGGCACAAAGGCAAGGCACCACCCTTT
CTTTAGTTTCTCTTGTGTTGGGGTTGATTTATCTGCACTTGGTTGCCGGAGTATATAAAA
TTCTACTCAGCGGTCTTTCTCTTTCCTGTTTTGTTATTTAATCCAGTTCAGATATTAGCC
CTTTTTACTCCTATTTTCTGATGTATAATAGTTCCTTGGGCTCCTGGTGGT
>comp1066_c0_seq1 len=336 path=[236:0-49 286:50-208 445:209-232 716:233-335]
GAATTCTCGATAGGAGGGCTACCTGCATTTGTGATTCTACAATCAATGAGCTGAAAATTA
AGATTTTCTCATATTCTTCTATTTCCTATTAGCTATTTAAGAAATTCATGTTATAAAGTA
GGTCTTCTGCAGTTACACCTGAGCTGGAATTAAGAAGGTTTCATAGTCTCAATTTCTTGT
GCTGTTATAGCAGTGAGATATTTATAGTAGGAATACAATTCTTTTGATTGATCCGCAGGT
AAAAATTTATCGTAGGAGACTGATAGTACAGAACTCATTCTCTACCAGGATTCAAATATG
TTATATGGAAATGCTACCTCAGTCACAAATTGATGG
>comp1067_c0_seq1 len=609 path=[263:0-608]
TGCCTCTCCGAACAGACCAAATGTCACCTCCTCCTCCATCATTGTAACTTTATTTCACTT
TCTCCAGAAGAGAGCGCACGATTGTAACCTTCTATATCCATGTCTCCATCTTGCCCTTCT
CCTTCAACTACTCTACTTTTTCTCCTATTCTCTTCTCTTTGTTTTGGTGTTGTGTCATTA
AAAATTAACTTCCCTCGACTGGGGATCGATCTCCAGAATTTCCGACTATACTATACAAAT
CTGAGTCGAGCTTACTACCACTGAGCTAAGGAAGCGAATGGATAGAAATGAGAAGAGGAA
GCTGATCACATCTCTTCCCCATTAAGGAAATTTTAGGTACTCTGATACCTAGTAAGGGAG
GTATGGGCCCTGGCCAGCGTATTACAACCCAGTGAGAATGCTCTATTCTTGACTGGCACA
GGAATTGGTTGTTATTCCTTCTCGAACGAGGCGGGGGACCTGCTGAATTCAGCAATCTGT
CCGAAATCGGCAGCGGCTCGACTAGTGTCTTGAGGGAGCTGTTTTGATGACATAAGAATA
ATTGTCCCCAGAGATTGCTGAGGAGCCATTCGGGCCCATGCTGACTGTAAAGTAAACAAC
CATTTCAGG
>comp1068_c0_seq1 len=749 path=[1:0-654 656:655-670 672:671-748]
AAATTGCTGCTAATCGTTGTACCTAAAATCATTGAGAACAGAGACCAATACTCCTAAACC
AATGCGTCCAGGAAAAAAAAACAAAAAAATTATATCACAAAATAAGTACAAAAGCCTAAC
TGTTCGTCCAGTGATCACATATGAGATTTGAGATTTAAACATCTTGAACCCAAATGTTTA
ACACAAGTGAAAACAAATAACATACAAACTGTTATCTTAGACAAAATCAATGGTTGTGGC
AAATGCACAGAATTCTTGAAAGTCAGTAATATTTGTAACTGACACCAGAGTAGGAGAAAT
TAAATAGTTTTACCATCCCAAACTTTTCCCAAGTTCCAAACTTCTTATGGCACTAACGAG
ACTTCCCAAAATCACTTAGGTAAAACCACGATTCAAGCACTGAATACCTTCATAATTTTA
TTTTATTGTCTTACAAGCCCCAAATTTTTATGGAAAATCATATTTGACATGAACAACCCA
CTGAAACCGAATAATGTGGCATAATCTGATGAGTAATTCTTGGTCATTTCAACAATCTGA
CCAAACTTGAATCTAATGGCATCACAATTGCAACAATGTCTGGGATGTTGGAAGTTGGCA
TGCTTATTTATTTTCATTAGCAATGCTCAATTTTATTCAAAACGCAGATTAAATTAGTTT
AGACGATACCATTGAGGACACCCAAAAGAGAGCCCAGTGTGAAGAAACAGACAGAAAAGG
ATACATACCTGTGAACAATCCCGAGAATG
>comp1069_c0_seq1 len=379 path=[1:0-378]
GGGGGGGGGGTTGGTTGCGTTGCCAGATTGCTTTTGTTTGGTATTAATTGATGCCTTCGA
AATTTATATCAGGATTAGTTGCTTCTGATTTGGTCAATAATTTTTTTAGGATCAAGTGCT
GGCGTTTAATGAATTAGCATGCAGTTAGAGTCATGGGATATTCTTGCTTTTTTGTCTTGG
ATTTTGATTTATTTGTTTTTAATTTTCATTTGTTTGATTTAGAGCCATGGACTATGTTGT
GTGCAGTCAGAAGCAGGTGTTTCCATGACGCAGTTCATGAGGGATTTATTATTGTCTACA
ACTCTACCTAGTTGGGTAAAGAATAATATACTTGTCAAATTGCTCCTCTAATTTCATGAA
GGCGATACCTGAAATGGCG
>comp1070_c0_seq1 len=345 path=[323:0-344]
ACTTGCAGACAAAGTTTTGAGTCTGCACACGGTTAAAGAGATTACGGTCATTCATTATCA
ATGCTGAAGCACTAGTATTATTTCCCAATGTGATCGGGTTGGCTATCTACAATGCTTTTC
TCCTAACTAACTACATGTTTCTTCCTTAGTTTCTCTATTTATTTTTGCGGTGTACTAGTA
TTATTTCTTTATTGCATTGTGACACCTTGACAACTAATAGTGCTATTTCAATTGACATTT
TTTTTTTTCTGAGATTAGGAACTGAATTGTTACTTGTAATGAAAGAAAGGGGTAATTCTC
AATGGTTTAGTGTAAGAGTTGAACAATTAAGGATTTCTATATATA
>comp1073_c0_seq1 len=396 path=[374:0-395]
GGGGTTTCTTGCCTTCCAGTTTTTCTGCGTTTCGTGGTTTTCCAGAAATACTTTGACAAT
GAAGCTCACACCTGTCAACCACGGCCATGGATTCGGAGAACTTGGAGTTTACATCAGGGG
TTTGGTGACGTACAAATTGAGCCCCTTCGAGCAGAAAGCTTTTGCCGGTGCGTCGAATTT
CCTCCCTAAAACCGCCAGGCGAATCGGCACCAGCTCCGTCTTCATTGTTCCACCGTTTCT
CCTTGGTTACCTGATCTTCTCCGAAGTCGAGAAGAAGTTCCATCGAATGTGCCGAAAAAA
CCCTGAAGATTACGTCAACGACAAGTAAATCCCAATCAATTGTGATTAGTGTAATTCTGA
TTGTAGCGACTAAAATTCACTCCAAGTTTCTCCGTT
>comp1077_c0_seq2 len=844 path=[1:0-224 1617:225-296 226:297-843]
CATCTTTTCACGTGGCCCCACAAGGAAAAGAGCCTTAATCTTCTTATCTTCATCAACCCA
GTGGGGGAGCTCTCGGCCGCTATGAAATTTTACAGAGACTTACTCTATTCTCTTTTGTCT
CTATCATGGTCTCAACTTGTTTCTTTTTGTCGGCAATGGTGGGTGGATGTTGCTTTTGTT
AGCCAAAAACAAAGCCAGAAGCTCTTTGATTCAACGTAGGAGCAAGTAAGGAGGAACCAA
ACTTCTATGCTATGCAGATCCAGATGTCTATTTTTTTTAAAAAATAATCATTTACTGAGA
ATAGCAAGGATGCCACTCAAGTAGATGTGTTCGTTAAAAGTAGCCAAGGCAATAAAGGAA
AACAGTTGGGCCAAGAGACGAATGATACAATATTAAAACTTCAGGATTTGATTCAAAATT
CTGGTAAATATGTTAAAAAAATCAATCTTTGGGAAAGGAAAGCCCAAGAGTGTGAGATGC
TATGGAAGAAATGTGACTATCTTCTTTGCAAAGAAATGAAGATCTTGAAGCTATCAAGTG
AAAGCATAATGATGAGGTAACCTCCTTGAATTGTGAGATTCAAAAAACCAAGAAAGGAAA
TTTGATGGCTAGGAAGCATTTTAAATTGCGTTTTGCAACCAAGCAACTTTGAACTAGATA
TGGAGAACTTGATAGTTGTATTGGAATCTTGTTCAAGTGATGCCAGCGGCACATATGTTC
CCGATAACGAAAAGGTATAATATTAAATTGTTATGTAGTTTGTTTTAGCAGTTGGGTATT
TTATTCTTAGGTTTGTAAATGAGCTTGATTGTTGGACTGACGTGATTGAAAATTTATATT
AAAG
>comp1078_c0_seq1 len=584 path=[1:0-583]
ACTCTTGTTGACTGGGAAAATCTGGCCTGCAGCTACTCTCAGCAAGGCTCGCCGGATTCT
GGTATCAGTCTGCTCCGAAACCCTCATCTGCACCCTCATCAACTCCCACGTCGTCACCGC
GCGCTTGCTCTTCCACGACGACGACGTTTTCAGACCAAGCGCCTTCTTCACCTTACTCGT
CGCCGTCGAAGTCAGCGACCTGTGCAACGACGGCGATGGATTCCGATGTCCTCCGTCGGA
GTGGGAGATGAACGTTAACGGCTTCGGCGCAGAACTCCGGCAAGCGCCGACTAGGATCTC
GTAGGCTGTTTCTCGGAGCTCCGAATCGGATAAATTCGGAGCGGGATGGCCGAAAGGAGA
GGGAAGGTCTTGAACGGAGTGTAGGTGCATGGTGTTTTGCATTGGCAAGGGTCTGTTACT
TGGAGCCTCCAAGTGCTCTGTCCCTGAACCTCATACACATTGCTTAATGAATGCCTTTTG
ATGCAGTGTCCGTGGGGCAACAAGTCACGCCAATTTCGGTTTAAGTGTCAGAGAAAGTGA
GAAGATTTAAGGTTAGCGTAGCAGCATCATGTTGCTTGGTAATG
>comp1079_c0_seq1 len=1389 path=[2944:0-156 185:157-1388]
CCAGAAACAGGATTTATGCAGAAAACCACTGACTTTGACAGAATTCTGGTATCAATTGGG
AAGGATTTAAAATCTAGGATTTTTGCAGTTGAAAGCCCAGTGTCTTAGGGTTTGAACAAA
AAAAAAATGGTTATTAATTCCAACATGCACAGCCCAAACAATGAACAAAAACATGACAGC
TGCCACACTTACATCAGCATGCGAATTTCACCTAAGTCCATGATAGGAAATACAGACATG
CCTAGCCATGGTGGAGGCTCACGAATTTCAACAACATAGCATGAAAGATAACATTTACGG
AACACAGAATGAAGCATGATTTTGGGGATTTTAATTCAAACATTACAGCATTCAAGATTT
ATAGGCACTTAAAAAAAAACAAAGACTGCAATACCTGGACAGATTATAACAACTCTTTTC
ATAACTAAGTATACAATTAGCAGACACCAAAACAAACATTCAGCTCCCAATAACAGTCTT
GTAACTCACTTCACAAGGATTTAGACATGCATAAACAAAGCACCCTATCATCCTACGGAA
ATTTGAAGCATTGATACAAACCCCAAATCTCATTTCATTCATTGCAATTCAATTTGGAAA
GCCTCTCTTTCTTAACCTGTCAACATGCAACGCAGATACATCAAATGGAAATGAAAGAAC
TCTACATCCCATTATACCTTTATGCTACACACTTTTCATGCTCTTTCACCAGTAAGCTTC
TACCCGCCCCTAGACCTTAACACACTAAAGACCATATCCCAGCACCACAGCAAGCAAGAT
CACCAGTAAGCAAGATGACACTAAACTAAATGACAATAATCATGACCAAGACAGTAAAAC
AGATGCAGAAAAAGAAATATGGTGAAAGCAAGAAGCAGTGCCACCCTTGAAGTGTCAAAT
GATAAGAAAGAAGCTCCATAGCATAACAAAACTTAACCAAAAGATTAATCACTTCACGAA
[truncated: 58,460,917 more chars]
