# Supplementary material for: De Novo Assembly and Characterization of Sophora japonica Transcriptome Using RNA-seq
Source: Biomed Res Int. 2014 Jan 2;2014:750961. doi: 10.1155/2014/750961 (PMC3910276; doi:10.1155/2014/750961)
Supplement: Supplementary file 1 — Additional file1: Information of unigenes expression in S. japonica. Additional file2: DNA sequences of all unigenes in S. japonica. Additional file3: Potential protein coding sequences of all unigenes in S. japonica. Additional file4: Quality score distribution across all bases. Additional file5: Quality score distribution over all sequences. Additional file6: Distribution of unigenes mapped to the speciesshown by pie graph. Additional file7: Detailed information for GO classification of unigenes in S. japonica. Additional file8: COG functional classification list of unigenes in S. japonica. Additional file9: Detailed information for unignenes mapping KEGG pathway in S. japonica. Additional file10: Illustration of the whole network of unigenes in S. japonica. Additional file11: Protein-protein interactions of unigenes in S. japonica. [file 750961.f1.zip › 750961.f1/Additional file/Additional file7 GO_file.txt]

comp57994_c0_seq5 GO:0005739 GO:0009507 GO:0006810 GO:0005215																																																																			
comp57994_c1_seq3 GO:0046914 GO:0000166																																																																					
comp57995_c0_seq2 GO:0050896 GO:0055114 GO:0000166 GO:0016616 GO:0071944																																																																		
comp57996_c0_seq4 GO:0046872 GO:0005886																																																																					
comp57997_c0_seq3 GO:0005886																																																																						
comp57998_c1_seq5 GO:0004222 GO:0005737 GO:0006508 GO:0008270																																																																			
comp57999_c0_seq19 GO:0005576 GO:0016023 GO:0016021 GO:0007568 GO:0005739																																																																		
comp58000_c0_seq2 GO:0016174 GO:0005886 GO:0043069 GO:0050832 GO:0005509 GO:0004601 GO:0016021 GO:0009408 GO:0009845 GO:0055114																																																													
comp58001_c0_seq3 GO:0010413 GO:0009749 GO:0009744 GO:0032580 GO:0009750 GO:0016021 GO:0007047 GO:0006486 GO:0045492 GO:0008107 GO:0009832 GO:0009969																																																											
comp58002_c0_seq1 GO:0010267 GO:0006346 GO:0000911 GO:0009965 GO:0048481 GO:0006261 GO:0006306 GO:0043085 GO:0003743 GO:0035197 GO:0005829 GO:0009816 GO:0051726 GO:0016572 GO:0009616 GO:0048449 GO:0006413 GO:0010529 GO:0019252 GO:0009555 GO:0010014 GO:0000023 GO:0005719 GO:0035196 GO:0005515 GO:0031048 GO:0006275 GO:0010495 GO:0051322 GO:0007267 GO:0009909 GO:0051567 GO:0008283 GO:0015030 GO:0051225 GO:0016444 GO:0009855 GO:0000724 GO:0010073 GO:0005730																															
comp58004_c0_seq3 GO:0005737 GO:0031408 GO:0005506 GO:0016165 GO:0055114																																																																		
comp58005_c0_seq1 GO:0008565 GO:0006904 GO:0009630 GO:0009306 GO:0005829																																																																		
comp58005_c1_seq3 GO:0042175 GO:0005794 GO:0005509 GO:0016757																																																																			
comp58007_c3_seq1 GO:0005886																																																																						
comp58008_c0_seq1 GO:0005829 GO:0005794																																																																					
comp58009_c0_seq5 GO:0009982 GO:0003723 GO:0006730 GO:0005634 GO:0031119																																																																		
comp58010_c0_seq1 GO:0055114 GO:0016207 GO:0080110 GO:0031956 GO:0047077 GO:0004467 GO:0001676 GO:0005737 GO:0046949																																																														
comp58011_c0_seq1 GO:0030170 GO:0006563 GO:0004372 GO:0006544																																																																			
comp58011_c1_seq1 GO:0008270 GO:0019264 GO:0005747 GO:0050897 GO:0032259 GO:0035999 GO:0004372 GO:0030170 GO:0008168																																																														
comp58012_c0_seq19 GO:0006468 GO:0004674 GO:0005524 GO:0050794																																																																			
comp58013_c0_seq1 GO:0000226 GO:0016458 GO:0048444 GO:0016570 GO:0006355 GO:0051301 GO:0006259 GO:0000279 GO:0048509 GO:0043414 GO:0040029																																																												
comp58013_c1_seq4 GO:0008270																																																																						
comp58014_c0_seq2 GO:0009750 GO:0006833 GO:0010215 GO:0046658 GO:0030243 GO:0009505 GO:0009825 GO:0006816 GO:0009651 GO:0007389 GO:0009055 GO:0043481 GO:0048767 GO:0006972 GO:0007030 GO:0005982 GO:0008361 GO:0006096 GO:0000271 GO:0009897 GO:0009926 GO:0046686 GO:0009060 GO:0000272 GO:0009266 GO:0008121 GO:0009932 GO:0009930 GO:0005750 GO:0022904																																									
comp58015_c0_seq3 GO:0010449 GO:0047654 GO:0010305 GO:0010073 GO:0010311 GO:0000166 GO:0048366 GO:0008152 GO:0030170 GO:2000012 GO:0005634 GO:0009790																																																											
comp58016_c0_seq4 GO:0005634 GO:0009507																																																																					
comp58017_c0_seq2 GO:0005743 GO:0016021																																																																					
comp58018_c0_seq1 GO:0006468 GO:0005524 GO:0005634 GO:0004674 GO:0006487																																																																		
comp58019_c0_seq7 GO:0016758																																																																						
comp58020_c0_seq5 GO:0005524 GO:0005622 GO:0008026 GO:0003725																																																																			
comp58022_c0_seq5 GO:0009640 GO:0010388 GO:0016567 GO:0006499 GO:0000085 GO:0016579 GO:0045893 GO:0005634 GO:0005886 GO:0006487 GO:0016571																																																												
comp58023_c0_seq9 GO:0019344 GO:0005634																																																																					
comp58024_c0_seq4 GO:0009416 GO:0004871 GO:0005886																																																																				
comp58026_c0_seq1 GO:0008106 GO:0035220 GO:0022416																																																																				
comp58028_c0_seq1 GO:0005768 GO:0005794 GO:0016023 GO:0009834 GO:0010417 GO:0080116 GO:0016020 GO:0005802																																																															
comp58029_c0_seq8 GO:0006468 GO:0004672 GO:0010075 GO:0016023 GO:0005524 GO:0048653 GO:0005576 GO:0009624 GO:0005886																																																														
comp58030_c1_seq2 GO:0005739																																																																						
comp58032_c0_seq2 GO:0005047 GO:0005786 GO:0006944 GO:0006623 GO:0005525 GO:0006184 GO:0048193 GO:0005785 GO:0006614 GO:0003924																																																													
comp58033_c0_seq2 GO:0004553 GO:0006468 GO:0005524 GO:0004674																																																																			
comp58034_c0_seq2 GO:0046922 GO:0036066																																																																					
comp58035_c0_seq8 GO:0044424																																																																						
comp58036_c0_seq1 GO:0046510 GO:0019288 GO:0015995 GO:0009941 GO:0046506 GO:0016117 GO:0019375 GO:0006636 GO:0019761 GO:0016036 GO:0005886																																																												
comp58037_c0_seq2 GO:0005634 GO:0009536 GO:0016874																																																																				
comp58038_c0_seq1 GO:0047262 GO:0005768 GO:0005794 GO:0016051 GO:0016926 GO:0050665 GO:0005802 GO:0010228																																																															
comp58038_c1_seq9 GO:0046592 GO:0006598 GO:0009805 GO:0008131 GO:0055114 GO:0005777 GO:0009414 GO:0009409 GO:0009611 GO:0042398 GO:0009737 GO:0005634																																																											
comp58038_c2_seq1 GO:0070981 GO:0004066 GO:0006541 GO:0005524																																																																			
comp58038_c3_seq3 GO:0005737 GO:0005730 GO:0035145 GO:0003723 GO:0005515 GO:0016604 GO:0010628																																																																
comp58039_c1_seq4 GO:0046872 GO:0009536																																																																					
comp58041_c0_seq7 GO:0008284 GO:0045492 GO:0010413 GO:0005634																																																																			
comp58042_c0_seq2 GO:0016117 GO:0003899 GO:0005515 GO:0001053 GO:0019288 GO:0006352 GO:0009902 GO:0090351 GO:0009507 GO:0009965 GO:0034660 GO:0003677 GO:0030154 GO:0003700 GO:0045893 GO:0071483 GO:0010027																																																						
comp58043_c0_seq5 GO:0008270 GO:0006417 GO:0009965 GO:0030154 GO:0009657 GO:0003700 GO:0045893 GO:0005634																																																															
comp58044_c1_seq2 GO:0048364 GO:0006355 GO:0010119 GO:0009733 GO:0010214 GO:0010089 GO:0001944 GO:0003700																																																															
comp58044_c2_seq2 GO:0016021																																																																						
comp58045_c0_seq5 GO:0005634 GO:0008270																																																																					
comp58047_c0_seq2 GO:0009536 GO:0016020																																																																					
comp58049_c0_seq1 GO:0005737 GO:0009555 GO:0046686 GO:0052543 GO:0005886 GO:0016036 GO:0003983 GO:0090406 GO:0008152 GO:0009651																																																													
comp58049_c1_seq1 GO:0043161 GO:0005829 GO:0051788 GO:0080129 GO:0004298 GO:0005774 GO:0046686 GO:0005839 GO:0005634 GO:0005886 GO:0048046																																																												
comp58049_c2_seq2 GO:0001510 GO:0003723 GO:0005730 GO:0008026 GO:0009536 GO:0051604 GO:0005524 GO:0017151																																																															
comp58050_c0_seq1 GO:0016132 GO:0005768 GO:0016757 GO:0005794 GO:0006084 GO:0005802 GO:0016126 GO:0009536																																																															
comp58051_c0_seq2 GO:0004712 GO:0005524 GO:0004713 GO:0000186 GO:0006499 GO:0004709 GO:0005886 GO:0000165 GO:0006487																																																														
comp58052_c0_seq2 GO:0004252 GO:0048193 GO:0030244 GO:0009507 GO:0006508 GO:0005829 GO:0070008																																																																
comp58053_c1_seq5 GO:0016132 GO:0004742 GO:0005739 GO:0006084 GO:0009941 GO:0022626 GO:0005886 GO:0009793 GO:0016126																																																														
comp58054_c3_seq24 GO:0016298 GO:0006629																																																																					
comp58055_c0_seq5 GO:0010497 GO:0010494 GO:0016556 GO:0003676 GO:0008026 GO:0005524 GO:0016441 GO:0009570 GO:0003724 GO:0009793																																																													
comp58056_c0_seq24 GO:0005886 GO:0046777 GO:0005524 GO:0004674 GO:0009536																																																																		
comp58057_c0_seq1 GO:0046777 GO:0005983 GO:0019200 GO:0005524 GO:0019252 GO:0009570 GO:0009664 GO:0051752 GO:2001070																																																														
comp58058_c0_seq4 GO:0003725 GO:0006970 GO:0048589 GO:0004647 GO:0045893 GO:0009734 GO:0005634																																																																
comp58059_c2_seq3 GO:0080022 GO:0005739 GO:0006355 GO:0006427 GO:0000041 GO:0003677 GO:0005524 GO:0003700 GO:0004821 GO:0009507 GO:0016036 GO:0005634																																																											
comp58060_c0_seq1 GO:0000911 GO:0005730 GO:0006955 GO:0000226 GO:0006184 GO:0003924 GO:0009507 GO:0005525																																																															
comp58061_c0_seq7 GO:0009739 GO:0010119 GO:0006636 GO:0009414 GO:0040007 GO:0009651 GO:0042742 GO:0005829 GO:0019432 GO:0006468 GO:0004674 GO:0005985 GO:0010029 GO:0048366 GO:0009789 GO:0005634 GO:0005524																																																						
comp58062_c0_seq11 GO:0051645 GO:0005743 GO:0051646 GO:0055085 GO:0005509 GO:0016021 GO:0060151 GO:0015867 GO:0030048																																																														
comp58063_c0_seq3 GO:0008284 GO:0016787 GO:0019344 GO:0005634																																																																			
comp58063_c1_seq3 GO:0019253 GO:0046872 GO:0009941 GO:0046686 GO:0004802 GO:0009570 GO:0005829 GO:0009535 GO:0009651																																																														
comp58064_c0_seq1 GO:0010103 GO:0000186 GO:0032440 GO:0016021 GO:0007169 GO:0000165 GO:0006486 GO:0004709 GO:0055114 GO:0002237 GO:0005886 GO:0005524 GO:0048443																																																										
comp58065_c0_seq7 GO:0000085 GO:0009908 GO:0010484 GO:0009536 GO:0005515 GO:0015408 GO:0006521 GO:0016579 GO:0000123 GO:0009410 GO:0016571 GO:0009624 GO:0010388 GO:0009640 GO:0010015 GO:0004694 GO:0018105 GO:0016567 GO:0003677 GO:0000049 GO:0045893 GO:0043687 GO:0006200 GO:0005886 GO:0005524 GO:0016573																																													
comp58066_c0_seq9 GO:0009864 GO:0009585 GO:0010193 GO:0009694 GO:0031348 GO:0080123 GO:0009640 GO:0010119 GO:0009627 GO:0009733 GO:0009861 GO:0070566 GO:0009507 GO:0005773																																																									
comp58067_c0_seq2 GO:0006526 GO:0009165 GO:0005524 GO:0006567 GO:0009570 GO:0004055																																																																	
comp58068_c3_seq6 GO:0005739 GO:0000166 GO:0055114 GO:0008270 GO:0003960																																																																		
comp58069_c0_seq22 GO:0005829 GO:0010118 GO:0006468 GO:0010555 GO:0004674 GO:0009414 GO:0009651 GO:0010107 GO:0009409 GO:0009611 GO:0007584 GO:0043266 GO:0051365 GO:0004713 GO:0005524 GO:0007165 GO:0005634 GO:0005886																																																					
comp58072_c0_seq4 GO:0008270																																																																						
comp58073_c0_seq1 GO:0006468 GO:0004674 GO:0010014 GO:0010073 GO:0005524 GO:0005515 GO:0006346 GO:0009855 GO:0005737 GO:0005634 GO:0005886 GO:0016246																																																											
comp58074_c0_seq68 GO:0005198 GO:0016192 GO:0006886 GO:0030117																																																																			
comp58075_c0_seq23 GO:0006629 GO:0008374 GO:0003700 GO:0003677 GO:0005634 GO:0006355																																																																	
comp58077_c0_seq3 GO:0007000 GO:0055028 GO:0006275 GO:0007131 GO:0046785 GO:0000911 GO:0051567 GO:0045010 GO:0010389 GO:0008283 GO:0009624 GO:0009524 GO:0051225 GO:0006342 GO:0052096 GO:0008017 GO:0007067 GO:0042023 GO:0051322 GO:0016572 GO:0007129 GO:0009574																																																	
comp58079_c0_seq6 GO:0008026 GO:0003676 GO:0005524 GO:0005634 GO:0008270 GO:0005739																																																																	
comp58080_c0_seq2 GO:0005737 GO:0052692 GO:0047274 GO:0006979 GO:0034484 GO:0009506 GO:0080167																																																																
comp58081_c5_seq1 GO:0097159 GO:1901363																																																																					
comp58082_c1_seq3 GO:0005887 GO:0005773 GO:0055085 GO:0008515 GO:0015770																																																																		
comp58083_c0_seq2 GO:0030551 GO:0005249 GO:0005886 GO:0055085 GO:0006813 GO:0016021 GO:0005516																																																																
comp58084_c0_seq6 GO:0003700 GO:0043565 GO:0006355																																																																				
comp58086_c0_seq4 GO:0006470 GO:0005739 GO:0042742 GO:0046872 GO:0008287 GO:0004722 GO:0009860 GO:0044419 GO:0009827 GO:0005886 GO:0048046																																																												
comp58086_c2_seq4 GO:0009011 GO:0005739 GO:0009501 GO:0016844 GO:0009505 GO:0019252 GO:0009507 GO:0005978 GO:2001070 GO:0006865																																																													
comp58088_c1_seq2 GO:0005737 GO:0009506 GO:0005886 GO:0006468 GO:0005524 GO:0005634 GO:0004674																																																																
comp58090_c0_seq8 GO:0044444 GO:0005886 GO:0043231																																																																				
comp58092_c0_seq23 GO:0016311 GO:0016791																																																																					
comp58093_c0_seq1 GO:0003899 GO:0006351 GO:0003677 GO:0005634																																																																			
comp58094_c0_seq2 GO:0008152 GO:0005542 GO:0009507 GO:0016740																																																																			
comp58095_c0_seq7 GO:0005829 GO:0006397 GO:0005634 GO:0009536																																																																			
comp58096_c0_seq5 GO:0009536																																																																						
comp58097_c0_seq2 GO:0051011 GO:0005876																																																																					
comp58098_c0_seq2 GO:0006904																																																																						
comp58099_c0_seq3 GO:0009987																																																																						
comp58100_c1_seq6 GO:0000085 GO:0000226 GO:0031048 GO:0006346 GO:0042393 GO:0007267 GO:0006275 GO:0008270 GO:0010429 GO:0000911 GO:0051567 GO:0016579 GO:0046974 GO:0008283 GO:0009855 GO:0010216 GO:0010388 GO:0009640 GO:0018022 GO:0005694 GO:0016567 GO:0051726 GO:0010385 GO:0010014 GO:0035196 GO:0016572 GO:0008327 GO:0010267 GO:0045893 GO:0006270 GO:0010073 GO:0005634 GO:0009616 GO:0010428																																					
comp58101_c0_seq6 GO:0015996 GO:0015326 GO:0015203 GO:0003333 GO:0005886 GO:0015846 GO:0016021																																																																
comp58102_c0_seq1 GO:0016132 GO:0006085 GO:0005829 GO:0016926 GO:0016829 GO:0003878 GO:0009346 GO:0010228 GO:0044262 GO:0004775 GO:0000166 GO:0050665 GO:0048037 GO:0005886 GO:0016126																																																								
comp58103_c0_seq3 GO:0007049 GO:0005634 GO:0016556 GO:0005739																																																																			
comp58105_c0_seq6 GO:0009737 GO:0009651 GO:0005739 GO:0009658																																																																			
comp58107_c0_seq2 GO:0008380 GO:0003723 GO:0016787 GO:0005634 GO:0009536																																																																		
comp58107_c1_seq2 GO:0008017 GO:0005739 GO:0010075 GO:0007010 GO:0010051 GO:0010005 GO:0009832 GO:0005634																																																															
comp58107_c2_seq2 GO:0016023 GO:0005739 GO:0016757																																																																				
comp58108_c0_seq5 GO:0006468 GO:0005524 GO:0004674																																																																				
comp58109_c0_seq12 GO:0015693 GO:0005773 GO:0005886 GO:0055085 GO:0015095 GO:0009536																																																																	
comp58110_c0_seq2 GO:0009744 GO:0009750 GO:0050897 GO:0006552 GO:0005524 GO:0004075 GO:0005759 GO:0004485 GO:0022626																																																														
comp58112_c0_seq5 GO:0016117 GO:0016767 GO:0009507																																																																				
comp58113_c0_seq4 GO:0016020 GO:0007030 GO:0009651 GO:0006816																																																																			
comp58114_c4_seq4 GO:0042732 GO:0005886 GO:0044425 GO:0005739																																																																			
comp58115_c1_seq4 GO:0008270																																																																						
comp58116_c1_seq9 GO:0005737 GO:0046872 GO:0048731 GO:0043231 GO:0030001																																																																		
comp58117_c0_seq3 GO:0009793																																																																						
comp58118_c0_seq2 GO:0030246 GO:0005886 GO:0006468 GO:0005524 GO:0004674																																																																		
comp58120_c0_seq4 GO:0005739																																																																						
comp58121_c0_seq7 GO:0005774 GO:0048731 GO:0044260 GO:0015706 GO:0071841 GO:0071554 GO:0016043 GO:0010167 GO:0050794 GO:0019344 GO:0005488 GO:0005739																																																											
comp58121_c2_seq11 GO:0006457 GO:0051082 GO:0005739 GO:0031072																																																																			
comp58124_c0_seq3 GO:0000394 GO:0045492 GO:0016891 GO:0006397 GO:0042406 GO:0004674 GO:0006987 GO:0010413 GO:0005524																																																														
comp58125_c0_seq1 GO:0005515 GO:0009658 GO:0009570																																																																				
comp58127_c1_seq1 GO:0016023 GO:0046658 GO:0009506 GO:0005739																																																																			
comp58129_c0_seq4 GO:0005634																																																																						
comp58131_c0_seq3 GO:0009987 GO:0008152 GO:0005886																																																																				
comp58133_c0_seq2 GO:0005829 GO:0003855 GO:0055114 GO:0004764 GO:0009570 GO:0019632 GO:0050661 GO:0009793 GO:0006865 GO:0009073																																																													
comp58134_c1_seq2 GO:0016023 GO:0005886 GO:0006468 GO:0005524 GO:0004674																																																																		
comp58136_c0_seq9 GO:0016556 GO:0009902 GO:0010103 GO:0019288 GO:0010027 GO:0048255 GO:0034660 GO:0042793 GO:0009507																																																														
comp58137_c1_seq39 GO:0006310 GO:0006302 GO:0003677 GO:0046983 GO:0003700 GO:0045892 GO:0005634																																																																
comp58138_c0_seq2 GO:0006007 GO:0006511 GO:0004221 GO:0004843 GO:0009755 GO:0006499 GO:0005737 GO:0005634																																																															
comp58138_c2_seq2 GO:0006457 GO:0046872 GO:0031072 GO:0051082 GO:1901363 GO:0097159 GO:0005739																																																																
comp58139_c0_seq2 GO:0005634																																																																						
comp58140_c0_seq4 GO:0016301 GO:0008152																																																																					
comp58141_c1_seq1 GO:0015385 GO:0009651 GO:0016021 GO:0048366 GO:0071436 GO:0010351 GO:0005773 GO:0006885 GO:0005886																																																														
comp58143_c0_seq4 GO:0006259 GO:0043414																																																																					
comp58144_c0_seq2 GO:0005886 GO:0016310 GO:0003872 GO:0005945 GO:0047334 GO:0005524 GO:0006096																																																																
comp58145_c0_seq1 GO:0030170 GO:0003676 GO:0008152 GO:0009536 GO:0008792																																																																		
comp58146_c0_seq14 GO:0010162 GO:0010029 GO:0000160 GO:0000156 GO:0035556 GO:0048831 GO:0006355 GO:0031537 GO:0007623 GO:0005515 GO:0009740 GO:0006950 GO:0009736 GO:0005634																																																									
comp58149_c0_seq1 GO:0016758 GO:0008152																																																																					
comp58151_c0_seq1 GO:0009941 GO:0048046 GO:0004807 GO:0032504 GO:0019288 GO:0006816 GO:0009651 GO:0006546 GO:0005829 GO:0007030 GO:0032880 GO:0009570 GO:0080022 GO:0019563 GO:0019253 GO:0006569 GO:0009658 GO:0009579 GO:0009684 GO:0019344 GO:0046166 GO:0006642 GO:0005739																																																
comp58151_c1_seq2 GO:0051788 GO:0006635 GO:0043161 GO:0009407 GO:0048825 GO:0080129 GO:0051510 GO:0005829 GO:0010564 GO:0009965 GO:0008541 GO:0042023 GO:0005634 GO:0010162																																																									
comp58153_c0_seq12 GO:0005886 GO:0008270																																																																					
comp58154_c1_seq6 GO:0005622 GO:0032313																																																																					
comp58155_c0_seq9 GO:0008270																																																																						
comp58156_c0_seq1 GO:0006355 GO:0042802 GO:0043565 GO:0006944 GO:0003700 GO:0048193 GO:0005634																																																																
comp58157_c0_seq2 GO:0006355 GO:0046983 GO:0009734 GO:0005634																																																																			
comp58158_c0_seq46 GO:0055085 GO:0006839 GO:0016021 GO:0005743 GO:0009220 GO:0005215 GO:0005886																																																																
comp58159_c0_seq3 GO:0009416 GO:0009737 GO:0009733 GO:0009651 GO:0009507																																																																		
comp58161_c0_seq4 GO:0005829																																																																						
comp58162_c0_seq27 GO:0000910 GO:0005484 GO:0006944 GO:0016192 GO:0008565 GO:0009504 GO:0005886																																																																
comp58162_c2_seq3 GO:0034968 GO:0040029 GO:0042393 GO:0018024 GO:0005694 GO:0005634 GO:0008270																																																																
comp58163_c0_seq2 GO:0005737 GO:0009744 GO:0016310 GO:0005515 GO:0043562 GO:0004679 GO:0009750																																																																
comp58164_c0_seq1 GO:0006098 GO:0019760 GO:0016117 GO:0005515 GO:0043085 GO:0004325 GO:0019252 GO:0006397 GO:0006783 GO:0019288 GO:0000023 GO:0009507 GO:0045727 GO:0046777 GO:0004674 GO:0019243 GO:0005634																																																						
comp58165_c1_seq6 GO:0005488 GO:0044238 GO:0044260																																																																				
comp58166_c0_seq1 GO:0007623 GO:0005524 GO:0000186 GO:0004709 GO:0016020 GO:0005634 GO:0000165																																																																
comp58167_c0_seq3 GO:0048573 GO:0005737																																																																					
comp58168_c0_seq2 GO:0009507 GO:0016020																																																																					
comp58168_c2_seq1 GO:0009507																																																																						
comp58169_c0_seq1 GO:0050896																																																																						
comp58170_c0_seq2 GO:0015079 GO:0071805 GO:0016020																																																																				
comp58171_c1_seq1 GO:0005829 GO:0000103 GO:0004781 GO:0019252 GO:0009570 GO:0009970 GO:0009853 GO:0008878																																																															
comp58172_c0_seq2 GO:0009507 GO:0005886																																																																					
comp58173_c0_seq9 GO:0004713 GO:0006468 GO:0005524 GO:0005576 GO:0004674																																																																		
comp58173_c1_seq1 GO:0003743 GO:0006413 GO:0006367 GO:0003677 GO:0009507 GO:0045893 GO:0003824 GO:0005634																																																															
comp58174_c2_seq13 GO:0005634 GO:0003677 GO:0008270 GO:0008643																																																																			
comp58175_c0_seq2 GO:0016023																																																																						
comp58176_c0_seq7 GO:0048519 GO:0055114 GO:0016021 GO:0009887 GO:0010051 GO:0016491 GO:0005524 GO:0000186 GO:0004709 GO:0048439 GO:0009855 GO:0005886 GO:0000165																																																										
comp58177_c0_seq1 GO:0005975 GO:0043169 GO:0030246 GO:0009507 GO:0004565 GO:0005829 GO:0009341																																																																
comp58178_c0_seq1 GO:0003676 GO:0000166																																																																					
comp58180_c0_seq5 GO:0043531																																																																						
comp58181_c1_seq4 GO:0015423 GO:0006200 GO:0005524 GO:0005886																																																																			
comp58182_c0_seq16 GO:0005737 GO:0050660 GO:0042744 GO:0016491 GO:0009055 GO:0002098 GO:0055114																																																																
comp58182_c1_seq3 GO:0003676 GO:0048585 GO:0009536 GO:0000956 GO:0009755 GO:0006486 GO:0048825 GO:0010182 GO:0005634																																																														
comp58184_c0_seq51 GO:0006810 GO:0009987 GO:0016021 GO:0005739																																																																			
comp58185_c0_seq4 GO:0009987 GO:0005634 GO:0005829																																																																				
comp58186_c0_seq15 GO:0006506 GO:0000030 GO:0031227 GO:0005634																																																																			
comp58188_c1_seq8 GO:0005886 GO:0043231 GO:0006886																																																																				
comp58189_c0_seq2 GO:0015416 GO:0006200 GO:0005524 GO:0016020																																																																			
comp58190_c0_seq6 GO:0009407 GO:0005777 GO:0004364 GO:0010583																																																																			
comp58192_c1_seq1 GO:0016020 GO:0016023 GO:0008152 GO:0005739 GO:0016746 GO:0009536																																																																	
comp58193_c1_seq2 GO:0009908																																																																						
comp58194_c0_seq13 GO:0005234 GO:0030288 GO:0004970 GO:0016021 GO:0009416 GO:0005262 GO:0009506 GO:0005217 GO:0006874 GO:0035235 GO:0004965 GO:0005515 GO:0006816 GO:0071230 GO:0009630 GO:0005576 GO:0007186																																																						
comp58195_c0_seq3 GO:0080041 GO:0006098 GO:0019760 GO:0008270 GO:0043085 GO:0019252 GO:0016045 GO:0019288 GO:0000023 GO:0051536 GO:0010266 GO:0009570 GO:0016829 GO:0009228																																																									
comp58196_c0_seq5 GO:0048046 GO:0005634																																																																					
comp58197_c0_seq2 GO:0009944 GO:0006468 GO:0004674 GO:0016021 GO:0010075 GO:0009506 GO:0010014 GO:0007169 GO:0016023 GO:0005524 GO:0009855 GO:0005886																																																											
comp58198_c0_seq2 GO:0005634 GO:0007623																																																																					
comp58200_c0_seq6 GO:0005622 GO:0005488																																																																					
comp58201_c0_seq4 GO:0000394 GO:0051567 GO:0010050 GO:0008283 GO:0033528 GO:0008898 GO:0009086 GO:0005737 GO:0046872 GO:0006306 GO:0045893 GO:0043687 GO:0009616 GO:0006260																																																									
comp58201_c1_seq1 GO:0007000 GO:0009536 GO:0008094 GO:0006275 GO:0000911 GO:0051567 GO:0006268 GO:0008283 GO:0006342 GO:0005829 GO:0006306 GO:0051726 GO:0003677 GO:0051322 GO:0009165 GO:0009909 GO:0006270 GO:0000280 GO:0005634 GO:0005524																																																			
comp58202_c3_seq20 GO:0004672																																																																						
comp58204_c0_seq3 GO:0006468 GO:0005524 GO:0005576 GO:0004674 GO:0009536																																																																		
comp58205_c0_seq2 GO:0005829 GO:0005507 GO:0005618 GO:0055114 GO:0006164 GO:0005739 GO:0009651 GO:0009941 GO:0004455 GO:0009097 GO:0009099 GO:0000166 GO:0006096 GO:0009570 GO:0016853 GO:0006094 GO:0050662 GO:0046686 GO:0048046																																																				
comp58207_c0_seq3 GO:0055085 GO:0051707 GO:0016021 GO:0000325 GO:0009506 GO:0010290 GO:0006200 GO:0005774 GO:0005524 GO:0015431 GO:0005886 GO:0048046																																																											
comp58208_c1_seq2 GO:0003677 GO:0006355																																																																					
comp58208_c3_seq28 GO:0007010 GO:0006094 GO:0006406 GO:0009651 GO:0010498 GO:0042742 GO:0005829 GO:0006096 GO:0046686 GO:0015416 GO:0006200 GO:0006606 GO:0005524 GO:0005739																																																									
comp58209_c1_seq1 GO:0009733 GO:0009908																																																																					
comp58209_c2_seq2 GO:0003723 GO:0030529 GO:0005634 GO:0000166																																																																			
comp58209_c3_seq2 GO:0048519 GO:0006355 GO:0010014 GO:0009909 GO:0009887 GO:0010051 GO:0010073 GO:0003677 GO:0048481 GO:0046983 GO:0048439 GO:0009855 GO:0009734 GO:0005634																																																									
comp58210_c0_seq4 GO:0006629 GO:0005773 GO:0046686 GO:0004190 GO:0005576 GO:0006508 GO:0005783 GO:0009651																																																															
comp58211_c0_seq2 GO:0005737 GO:0046777 GO:0004712 GO:0005524 GO:0005634 GO:0004674																																																																	
comp58212_c1_seq6 GO:0019375 GO:0016036 GO:0016787 GO:0042631																																																																			
comp58213_c0_seq1 GO:0003700 GO:0003677 GO:0005634 GO:0006355																																																																			
comp58213_c2_seq1 GO:0006606 GO:0006364 GO:0005634 GO:0005829 GO:0030688																																																																		
comp58213_c6_seq2 GO:0020037 GO:0016705 GO:0004497 GO:0005506 GO:0009055 GO:0055114																																																																	
comp58213_c7_seq8 GO:0009507 GO:0005886																																																																					
comp58214_c0_seq6 GO:0016117 GO:0016705 GO:0016853 GO:0009507																																																																			
comp58215_c0_seq2 GO:0000156 GO:0035556 GO:0051740 GO:0018106 GO:0006355 GO:0023014 GO:0005524 GO:0000155 GO:0005789 GO:0009873																																																													
comp58215_c1_seq2 GO:0000156 GO:0035556 GO:0051740 GO:0018106 GO:0006355 GO:0023014 GO:0005524 GO:0000155 GO:0005789 GO:0009873																																																													
comp58216_c3_seq2 GO:0016036 GO:0042550 GO:0019375 GO:0016117 GO:0006655 GO:0006636 GO:0006869 GO:0019288 GO:0046480 GO:0009877 GO:0015995 GO:0009707 GO:0001666 GO:0043661 GO:0046481 GO:0005739																																																							
comp58220_c2_seq5 GO:0042742 GO:0016884 GO:0070291 GO:0005794 GO:0005886 GO:0005774 GO:0047412 GO:0016740 GO:0004040 GO:0005783																																																													
comp58221_c0_seq7 GO:0016787																																																																						
comp58221_c2_seq8 GO:0016480 GO:0005634																																																																					
comp58223_c0_seq44 GO:0005794 GO:0016020																																																																					
comp58224_c1_seq4 GO:0005802 GO:0005794 GO:0005768 GO:0005739 GO:0016757																																																																		
comp58225_c0_seq7 GO:0005385 GO:0071577 GO:0030125 GO:0006623 GO:0016021 GO:0030244 GO:0030131 GO:0005515 GO:0048193 GO:0009630 GO:0009507 GO:0005375																																																											
comp58226_c0_seq4 GO:0052692 GO:0009505 GO:0043169 GO:0030246 GO:0046477 GO:0005576 GO:0005829 GO:0009311 GO:0005739 GO:0016139																																																													
comp58227_c0_seq1 GO:0003824																																																																						
comp58228_c0_seq4 GO:0004028 GO:0004029 GO:0046686 GO:0005524 GO:0009507 GO:0005739 GO:0055114 GO:0001758																																																															
comp58229_c0_seq6 GO:0043247 GO:0009888 GO:0010332 GO:0007131 GO:0045492 GO:0032504 GO:0010638 GO:0045132 GO:0016926 GO:0042138 GO:0006486 GO:0032204 GO:0010413 GO:0009887 GO:0007129 GO:0007062																																																							
comp58230_c0_seq19 GO:0003677																																																																						
comp58231_c0_seq2 GO:0005986 GO:0019375 GO:0016157 GO:0005618 GO:0080165 GO:0001666 GO:0009507																																																																
comp58234_c0_seq2 GO:0009987 GO:0044424																																																																					
comp58235_c0_seq1 GO:0016757																																																																						
comp58236_c0_seq6 GO:0016021 GO:0004806 GO:0015171 GO:0003333 GO:0006629																																																																		
comp58236_c1_seq4 GO:0052716 GO:0005507 GO:0008447 GO:0048046 GO:0046274 GO:0055114																																																																	
comp58237_c0_seq1 GO:0009507																																																																						
comp58238_c0_seq1 GO:0016132 GO:0006085 GO:0005829 GO:0003985 GO:0005777 GO:0009860 GO:0009846 GO:0019745 GO:0005886 GO:0009793 GO:0016126																																																												
comp58238_c1_seq4 GO:0009522 GO:0010114 GO:0016168 GO:0005739 GO:0016021 GO:0046872 GO:0018298 GO:0009941 GO:0009637 GO:0009535 GO:0009523 GO:0010287 GO:0010218 GO:0009765 GO:0048046																																																								
comp58240_c0_seq23 GO:0006415 GO:0003747 GO:0005739																																																																				
comp58241_c0_seq14 GO:0008233 GO:0009646 GO:0034214 GO:0009941 GO:0006508 GO:0005524 GO:0016887 GO:0009570 GO:0042803																																																														
comp58243_c0_seq3 GO:0005506 GO:0016706 GO:0009987 GO:0055114																																																																			
comp58244_c0_seq2 GO:0010118 GO:0007164 GO:0072583 GO:0016308 GO:0005524 GO:0006499 GO:0009860 GO:0046854 GO:0016324 GO:0044445 GO:0009846 GO:0030048 GO:0090406 GO:0009827 GO:0005634																																																								
comp58245_c0_seq2 GO:0042802 GO:0009505 GO:0051322 GO:0004252 GO:0000911 GO:0009506 GO:0016023 GO:0005576 GO:0006508 GO:0043086																																																													
comp58246_c0_seq15 GO:0006396 GO:0022402 GO:0030244 GO:0005515 GO:0005802 GO:0048193 GO:0009630 GO:0005794																																																															
comp58247_c0_seq2 GO:0003676 GO:0006351																																																																					
comp58248_c0_seq3 GO:0008026 GO:0003676 GO:0043138 GO:0005524 GO:0005634 GO:0006310 GO:0009378																																																																
comp58249_c0_seq18 GO:0005773 GO:0009506 GO:0006486 GO:0016020																																																																			
comp58250_c0_seq9 GO:0000956 GO:0000166 GO:0006487																																																																				
comp58250_c1_seq1 GO:0015297 GO:0009611 GO:0009620 GO:0009414 GO:0004672 GO:0015969 GO:0009753 GO:0016310 GO:0009507 GO:0042538 GO:0008728 GO:0048765 GO:0009695 GO:0009738 GO:0055085 GO:0005886 GO:0005488 GO:0009723 GO:0009733																																																				
comp58252_c0_seq6 GO:0005886 GO:0005783																																																																					
comp58254_c0_seq1 GO:0003676 GO:0005634 GO:0009507																																																																				
comp58255_c0_seq4 GO:0016132 GO:0005507 GO:0006457 GO:0006084 GO:0009408 GO:0009055 GO:0052546 GO:0046658 GO:0005773 GO:0009644 GO:0042542 GO:0052541 GO:0016126 GO:0048046																																																									
comp58255_c1_seq1 GO:0009684 GO:0009751 GO:0006569 GO:0030003 GO:0070838 GO:0009507 GO:0006995 GO:0050832																																																															
comp58255_c3_seq6 GO:0042176 GO:0010218 GO:0009867 GO:2000033 GO:0009938 GO:0006355 GO:0006808 GO:0042538 GO:0010187 GO:0009737 GO:0010233 GO:0009863 GO:0005634 GO:0009723																																																									
comp58256_c2_seq2 GO:0004129 GO:0005739 GO:0005634																																																																				
comp58257_c1_seq2 GO:0016788 GO:0005739 GO:0031227 GO:0005774 GO:0016023 GO:0006886 GO:0006505																																																																
comp58258_c0_seq1 GO:0004713 GO:0006468 GO:0004712 GO:0005524 GO:0010119 GO:0005634 GO:0004674																																																																
comp58259_c0_seq6 GO:0005739																																																																						
comp58260_c0_seq1 GO:0006950 GO:0006468 GO:0005524 GO:0002238 GO:0005634 GO:0004674																																																																	
comp58261_c1_seq22 GO:0008643 GO:0005886 GO:0016021																																																																				
comp58262_c1_seq2 GO:0009987																																																																						
comp58263_c0_seq1 GO:0005634 GO:0005829																																																																					
comp58264_c0_seq3 GO:0008270 GO:0016558 GO:0009755 GO:0006635 GO:0005737																																																																		
comp58265_c0_seq14 GO:0009941 GO:0004252 GO:0009840 GO:0019252 GO:0009534 GO:0006508 GO:0000023																																																																
comp58266_c0_seq10 GO:0005789 GO:0006659 GO:0003882 GO:0005634 GO:0005739																																																																		
comp58267_c0_seq34 GO:0003723 GO:0005739 GO:0005634																																																																				
comp58268_c1_seq1 GO:0004683 GO:0004723 GO:0009825 GO:0004713 GO:0016926 GO:0005509 GO:0030833 GO:0005737 GO:0003779 GO:0010090 GO:0006468 GO:0050665 GO:0005885 GO:0010228 GO:0005886 GO:0005524																																																							
comp58269_c0_seq1 GO:0048767 GO:0003700 GO:0004674 GO:0048825 GO:0000271 GO:0043481 GO:0009825 GO:0043687 GO:0051301 GO:0007169 GO:0048653 GO:0009926 GO:0010075 GO:0010072 GO:0009880 GO:0010030 GO:0016491 GO:0010162 GO:0005886 GO:2000034 GO:0009630 GO:0007062 GO:0045595 GO:0008361 GO:0048366 GO:0005524 GO:0010564 GO:0045893 GO:0009932 GO:0007020 GO:0005634 GO:0009664 GO:0009832 GO:0006468																																					
comp58270_c1_seq55 GO:0009595 GO:0002237 GO:0010200 GO:0009581 GO:0006468 GO:0005524 GO:0004674 GO:0009536																																																															
comp58270_c6_seq1 GO:0003964 GO:0006278 GO:0003723 GO:0006397 GO:0005739																																																																		
comp58271_c0_seq1 GO:0006007 GO:0006468 GO:0080022 GO:0004674 GO:0010050 GO:0009594 GO:0005524 GO:0005515 GO:0006486 GO:0009738 GO:0003006 GO:0010260 GO:0010182 GO:0006950 GO:0000152																																																								
comp58271_c1_seq2 GO:0009317 GO:0006633 GO:0009941 GO:0006744 GO:0009570 GO:0016740 GO:0016020 GO:0003989																																																															
comp58273_c0_seq21 GO:0033562 GO:0006346 GO:0006306																																																																				
comp58274_c2_seq2 GO:0050072 GO:0030145 GO:0006635 GO:0016558 GO:0031087 GO:0016441 GO:0000287 GO:0000932 GO:0042803 GO:0005634 GO:0010072 GO:0003729																																																											
comp58275_c1_seq4 GO:0009684 GO:0005829 GO:0080146 GO:0009610 GO:0045439 GO:0019450 GO:0006569 GO:0046482 GO:0030170 GO:0019344																																																													
comp58276_c1_seq15 GO:0016779 GO:0008265 GO:0008152 GO:0005524 GO:0005737																																																																		
comp58277_c0_seq6 GO:0048316 GO:0051507 GO:0030244 GO:0016125 GO:0009631 GO:0030259 GO:0005886																																																																
comp58278_c0_seq3 GO:0016798 GO:0008152																																																																					
comp58279_c0_seq4 GO:0000911 GO:0006468 GO:0004674 GO:0005730 GO:0000226 GO:0005524 GO:0005515 GO:0005737																																																															
comp58280_c0_seq2 GO:0009941 GO:0044262 GO:0009409 GO:0005886 GO:0030060 GO:0006108 GO:0005774 GO:0010319 GO:0009570 GO:0048046 GO:0005739 GO:0055114 GO:0000166																																																										
comp58281_c0_seq13 GO:0001510 GO:0009560 GO:0005829 GO:0005618 GO:0042991 GO:0005730 GO:0009506 GO:0009220																																																															
comp58283_c0_seq10 GO:0016020																																																																						
comp58284_c0_seq6 GO:0005634																																																																						
comp58285_c0_seq17 GO:0005783																																																																						
comp58287_c0_seq1 GO:0010089 GO:0003824 GO:0010382																																																																				
comp58288_c0_seq8 GO:0005975 GO:0005773 GO:0010106 GO:0015706 GO:0010167 GO:0005576 GO:0006826 GO:0005829 GO:0008422																																																														
comp58289_c0_seq1 GO:0006499 GO:0000234 GO:0043085 GO:0019252 GO:0004379 GO:0000023 GO:0009698 GO:0005829 GO:0042425 GO:0010183 GO:0052667 GO:0006598 GO:0042398 GO:0009555 GO:0032259 GO:0006950 GO:0048528 GO:0006656 GO:0009860																																																				
comp58290_c0_seq3 GO:0006810 GO:0044249 GO:0044238 GO:0003676 GO:0005622 GO:0000166																																																																	
comp58292_c0_seq2 GO:0019005 GO:0005634 GO:0009723																																																																				
comp58295_c0_seq4 GO:0008131 GO:0007020 GO:0009736 GO:0005739 GO:0055114																																																																		
comp58296_c0_seq10 GO:0005956 GO:0042753 GO:0004674 GO:0071900 GO:0048573 GO:0008134 GO:0005737 GO:0005634 GO:0019887																																																														
comp58297_c0_seq28 GO:0042344 GO:0009697 GO:0010686 GO:0005777 GO:0010363 GO:0019761 GO:0010200 GO:0009684 GO:0030003 GO:0031348 GO:0046856 GO:0070838 GO:0070300 GO:0005829 GO:0009867 GO:0019684 GO:0019137 GO:0009941 GO:0009595 GO:0042742 GO:0006612 GO:0006569 GO:0080011 GO:0010167 GO:0002831 GO:0010310 GO:0019745 GO:0006944 GO:0052544 GO:0016314 GO:0009817 GO:0043407 GO:0009862 GO:0048193 GO:0009409 GO:0004725 GO:0000165 GO:0015706 GO:0035335 GO:0043900 GO:0016020																														
comp58297_c1_seq2 GO:0009416 GO:0003700																																																																					
comp58298_c0_seq32 GO:0016020 GO:0044464																																																																					
comp58299_c0_seq2 GO:0016779 GO:0005829 GO:0005618 GO:0003746 GO:0008270 GO:0005739 GO:0050897 GO:0009220 GO:0006414 GO:0005524 GO:0006184 GO:0003924 GO:0046686 GO:0005525																																																									
comp58300_c0_seq8 GO:0016757																																																																						
comp58301_c1_seq14 GO:0005737 GO:0004715 GO:0006468 GO:0004712 GO:0005524 GO:0004674																																																																	
comp58302_c0_seq20 GO:0048449 GO:0016570 GO:0009909 GO:0009507																																																																			
comp58303_c1_seq11 GO:0003676																																																																						
comp58304_c0_seq5 GO:0047769 GO:0010048 GO:0003723 GO:0048440 GO:0032259 GO:0043481 GO:0009094 GO:0004664 GO:0046417 GO:0016597 GO:0009507 GO:0008168																																																											
comp58305_c0_seq35 GO:0010351 GO:0055085 GO:0015386 GO:0006813 GO:0016021 GO:0005739 GO:0006814																																																																
comp58306_c0_seq2 GO:0006882 GO:0009624 GO:0005768 GO:0006816 GO:0005794 GO:0004722 GO:0016020 GO:0005802																																																															
comp58307_c0_seq1 GO:0003777 GO:0005874 GO:0005524 GO:0007018 GO:0005737																																																																		
comp58308_c0_seq1 GO:0008233 GO:0008540 GO:0016887 GO:0005886 GO:0006511 GO:0005524 GO:0005634 GO:0005829																																																															
comp58309_c0_seq3 GO:0005829 GO:0009904 GO:0009860 GO:0009903 GO:0005515 GO:0009827 GO:0005886																																																																
comp58310_c0_seq1 GO:0008272 GO:0055085 GO:0016021 GO:0009507 GO:0008271																																																																		
comp58311_c1_seq1 GO:0006399 GO:0008360 GO:0009295 GO:0010020 GO:0009902 GO:0051301 GO:0009507 GO:0009252 GO:0045893 GO:0042793 GO:0008765 GO:0005524 GO:0006364 GO:0010027																																																									
comp58311_c3_seq5 GO:0006457 GO:0016226 GO:0006364 GO:0019288 GO:0009658 GO:0006399 GO:0009570 GO:0010207 GO:0045036 GO:0009073																																																													
comp58312_c0_seq3 GO:0010598 GO:0006098 GO:0009773 GO:0016117 GO:0009535 GO:0010207 GO:0016757																																																																
comp58313_c0_seq3 GO:0016023 GO:0030243 GO:0009825 GO:0009664 GO:0016021 GO:0043481 GO:0048767 GO:0046777 GO:0007169 GO:0005982 GO:0010817 GO:0004674 GO:0000271 GO:0019761 GO:0004714 GO:0009832 GO:0000272 GO:0009932 GO:0005886 GO:0005524																																																			
comp58314_c0_seq7 GO:0005975 GO:0009505 GO:0048046 GO:0030246 GO:0004565 GO:0043169																																																																	
comp58315_c0_seq3 GO:0008270 GO:0003676																																																																					
comp58316_c0_seq4 GO:0008270 GO:0003676 GO:0005622																																																																				
comp58317_c0_seq6 GO:0048193 GO:0006944 GO:0010200 GO:0005739 GO:0009536																																																																		
comp58317_c2_seq2 GO:0005515 GO:0000910 GO:0004672 GO:0006468 GO:0007017 GO:0005524 GO:0000049 GO:0006409																																																															
comp58318_c0_seq1 GO:0047262 GO:0005768 GO:0005794 GO:0010289 GO:0005802 GO:0005739																																																																	
comp58320_c0_seq1 GO:0050896 GO:0044248 GO:0044238 GO:0044699																																																																			
comp58321_c0_seq1 GO:0006457 GO:0005515 GO:0043231																																																																				
comp58322_c1_seq6 GO:0016491 GO:0046855 GO:0032957																																																																				
comp58323_c0_seq18 GO:0006310 GO:0006281 GO:0003676 GO:0051726 GO:0008026 GO:0043138 GO:0005524 GO:0006270 GO:0006275 GO:0005634																																																													
comp58324_c0_seq10 GO:0043231																																																																						
comp58325_c0_seq3 GO:0000373 GO:0009507																																																																					
comp58326_c0_seq14 GO:0005829 GO:0005618 GO:0005509 GO:0060151 GO:0051015 GO:0007623 GO:0030036 GO:0009860 GO:0051646 GO:0051645 GO:0009846 GO:0005773 GO:0030048																																																										
comp58327_c0_seq3 GO:0005737																																																																						
comp58328_c0_seq1 GO:0016630 GO:0010073 GO:0005634 GO:0005783 GO:0000166 GO:0055114																																																																	
comp58329_c0_seq4 GO:0043247 GO:0010332 GO:0032504 GO:0006281 GO:0045132 GO:0004674 GO:0009506 GO:0009536 GO:0010044 GO:0042138 GO:0005524 GO:0007062 GO:0007129 GO:0007004 GO:0016310 GO:0007131 GO:0032204 GO:0005634																																																					
comp58330_c0_seq10 GO:0016874 GO:0043234 GO:0044424																																																																				
comp58331_c0_seq2 GO:0005802 GO:0016020 GO:0010154 GO:0007155 GO:0045010 GO:0015018 GO:0005794 GO:0010051 GO:0010090 GO:0042285 GO:0048765 GO:0010417 GO:0005768 GO:0048367 GO:0071555																																																								
comp58332_c0_seq4 GO:0005829 GO:0004722 GO:0008152 GO:0005739																																																																			
comp58333_c0_seq1 GO:0006862 GO:0016023 GO:0006944 GO:0010363 GO:0015802 GO:0052544 GO:0006612 GO:0050832 GO:0042742 GO:0043069 GO:0005794 GO:0009870 GO:0043090 GO:0009965 GO:0015696 GO:0009556 GO:0006075 GO:0006820 GO:0010150 GO:0006888 GO:0009506 GO:0000148 GO:0003843 GO:0009863 GO:0043269 GO:0007623																																													
comp58334_c0_seq1 GO:0003743 GO:0016779 GO:0005829 GO:0016070 GO:0009165 GO:0006446																																																																	
comp58335_c2_seq19 GO:0005975 GO:0005576 GO:0016021 GO:0004650 GO:0007047																																																																		
comp58336_c0_seq32 GO:0003723 GO:0006396 GO:0005634																																																																				
comp58337_c0_seq1 GO:0010035 GO:0050789 GO:0009725 GO:0005509 GO:0009416 GO:0009266 GO:0009791 GO:0048608 GO:0005773 GO:0006950 GO:0005886																																																												
comp58337_c1_seq31 GO:0005829 GO:0010102 GO:0000145 GO:0070062 GO:0048354 GO:0006904 GO:0005634 GO:0005886																																																															
comp58338_c0_seq3 GO:0019684 GO:0015700 GO:0031348 GO:0009595 GO:0006635 GO:0009867 GO:0009697 GO:0009862 GO:0046482 GO:0006944 GO:0010363 GO:0010310 GO:0002679 GO:0042344 GO:0010200 GO:0071992 GO:0046938 GO:0052544 GO:0016491 GO:0009809 GO:0043900 GO:0006612 GO:0046685 GO:0050832 GO:0042742 GO:0009507 GO:0043069 GO:0005829 GO:0002831 GO:0010337 GO:0015446 GO:0000165 GO:0034976 GO:0046870 GO:0046686 GO:0009409 GO:0005507 GO:0016756																																	
comp58339_c0_seq1 GO:0006468 GO:0055114 GO:0004674 GO:0010103 GO:0016021 GO:0007169 GO:0016023 GO:0004713 GO:0005524 GO:0048443 GO:0002237 GO:0032440 GO:0005886																																																										
comp58340_c0_seq2 GO:0005829 GO:0005634																																																																					
comp58341_c0_seq13 GO:0003899 GO:0050776 GO:0000418 GO:0000419 GO:0003677 GO:0005720 GO:0005515 GO:0032549 GO:0030422 GO:0006351 GO:0006306 GO:0050832 GO:0016020																																																										
comp58342_c1_seq3 GO:0003729 GO:0031123 GO:0022402 GO:0005515 GO:0009630 GO:0006397 GO:0045892 GO:0005634																																																															
comp58345_c0_seq1 GO:0000502 GO:0046686																																																																					
comp58347_c0_seq1 GO:0055085 GO:0031348 GO:0005739 GO:0045087 GO:0046873 GO:0006944 GO:0030968 GO:0009863 GO:0030001 GO:0005886 GO:0009697																																																												
comp58350_c2_seq2 GO:0009504 GO:0009735 GO:0005975 GO:0042538 GO:0005769 GO:0016740 GO:0043622 GO:0008810 GO:0009826 GO:0048367 GO:0009624 GO:0005794 GO:0005886																																																										
comp58350_c3_seq16 GO:0005634																																																																						
comp58351_c0_seq1 GO:0006598 GO:0005507 GO:0055114 GO:0008270 GO:0005739 GO:0009651 GO:0050897 GO:0004353 GO:0009698 GO:0005774 GO:0005524 GO:0042398 GO:0006944 GO:0048193 GO:0046482 GO:0046686 GO:0004352 GO:0005794 GO:0005886																																																				
comp58352_c0_seq2 GO:0055114 GO:0010345 GO:0070330 GO:0000041 GO:0009055 GO:0019825 GO:0020037 GO:0042761 GO:0009507 GO:0005506 GO:0005783																																																												
comp58353_c1_seq14 GO:0009506 GO:0006200 GO:0005524 GO:0010583 GO:0015417 GO:0009407 GO:0005886																																																																
comp58354_c0_seq3 GO:0008284 GO:0010224 GO:0000956 GO:0048364 GO:0005634 GO:0006281																																																																	
comp58355_c0_seq5 GO:0008287 GO:0046872 GO:0004722 GO:0005886 GO:0006470																																																																		
comp58356_c0_seq2 GO:0005829 GO:0031087 GO:0017148 GO:0000932 GO:0010606 GO:0042803 GO:0006487																																																																
comp58358_c0_seq3 GO:0009504 GO:0005886 GO:0000910 GO:0005635 GO:0032153 GO:0009507 GO:0005783 GO:0009651																																																															
comp58360_c0_seq3 GO:0051707 GO:0000325 GO:0010290 GO:0006200 GO:0005774 GO:0005524 GO:0015431 GO:0005886 GO:0048046																																																														
comp58360_c2_seq1 GO:0055085 GO:0016021 GO:0042626 GO:0006200 GO:0005524																																																																		
comp58361_c0_seq2 GO:0009908 GO:0005783																																																																					
comp58362_c0_seq3 GO:0005886 GO:0006950 GO:0006468 GO:0005524 GO:0002238 GO:0005634 GO:0004689																																																																
comp58363_c0_seq4 GO:0009941 GO:0009853 GO:0005524 GO:0008887 GO:0009570 GO:0005634																																																																	
comp58364_c0_seq5 GO:0016926 GO:0045595 GO:0008270 GO:0010431 GO:0033044 GO:0005739 GO:0051177 GO:0009880 GO:0034508 GO:0010072 GO:0051301 GO:0010228 GO:0042138 GO:0007131 GO:0050665 GO:0005634																																																							
comp58365_c0_seq1 GO:0006007 GO:0005739 GO:0005634																																																																				
comp58365_c2_seq3 GO:0010155 GO:0009072 GO:0010218 GO:0000096 GO:0009744 GO:0016117 GO:0000038 GO:0016020 GO:0006636 GO:0009793 GO:0009825 GO:0044272 GO:0010114 GO:0019288 GO:0006766 GO:0006546 GO:0019748 GO:0042742 GO:0043481 GO:0009106 GO:0048868 GO:0048767 GO:0015995 GO:0009108 GO:0016226 GO:0019216 GO:0010817 GO:0008652 GO:0000271 GO:0009637 GO:0009644 GO:0010228 GO:0009695 GO:0042335 GO:0009409 GO:0009922 GO:0009932 GO:0010025 GO:0005783 GO:0048481 GO:0010027 GO:0006733 GO:0071555 GO:0009117																											
comp58368_c0_seq9 GO:0005829 GO:0004828 GO:0097056 GO:0009651 GO:0006434 GO:0009165 GO:0005524 GO:0006499 GO:0006096 GO:0006094 GO:0046686																																																												
comp58369_c0_seq1 GO:0004715 GO:0016023 GO:0006468 GO:0005524 GO:0004674																																																																		
comp58369_c1_seq10 GO:0016021 GO:0045892																																																																					
comp58369_c2_seq2 GO:0035241 GO:0050826 GO:0034970 GO:0016458 GO:0009793 GO:0006406 GO:0009220 GO:0035242 GO:0009507 GO:0048449 GO:0009640 GO:0046982 GO:0019915 GO:0010182 GO:0016277 GO:0009933 GO:0016567 GO:0034971 GO:0009845 GO:0010074 GO:0010228 GO:0034972 GO:0008469 GO:0042803 GO:0009909 GO:0019919 GO:0034968 GO:0005634 GO:0048481 GO:0010162																																									
comp58370_c0_seq1 GO:0015996 GO:0006944 GO:0048193 GO:0009507																																																																			
comp58370_c1_seq2 GO:0046686 GO:0009737 GO:0005737 GO:0005886																																																																			
comp58371_c0_seq4 GO:0009987																																																																						
comp58372_c0_seq2 GO:0003723 GO:0006606 GO:0008033 GO:0004809 GO:0006406 GO:0009507 GO:0005634																																																																
comp58373_c0_seq4 GO:0003777 GO:0009086 GO:0010215 GO:0005874 GO:0010075 GO:0005524 GO:0007018 GO:0000394 GO:0005737 GO:0005634																																																													
comp58374_c1_seq4 GO:0004137 GO:0016773 GO:0016310 GO:0006139 GO:0005524 GO:0005634																																																																	
comp58375_c0_seq5 GO:0008270 GO:0051707 GO:0006355 GO:0071310 GO:0003676 GO:0005622 GO:0007165 GO:0031347 GO:0045087 GO:0032502																																																													
comp58376_c0_seq1 GO:0005488																																																																						
comp58376_c1_seq2 GO:0009867 GO:0005515 GO:0045892 GO:0005634																																																																			
comp58377_c0_seq9 GO:0042538 GO:0006629 GO:0004252 GO:0005794 GO:0006486 GO:0005576 GO:0006888 GO:0006508 GO:0005783																																																														
comp58378_c0_seq2 GO:0080008 GO:0005737 GO:0000166																																																																				
comp58379_c0_seq4 GO:0005774 GO:0031348 GO:0030246 GO:0006777 GO:0009605 GO:0006457 GO:0009867 GO:0042542 GO:0009862 GO:0009505 GO:0010363 GO:0009734 GO:0006612 GO:0005509 GO:0050832 GO:0016021 GO:0009507 GO:0005789 GO:0043069 GO:0005794 GO:0005829 GO:0000165 GO:0051082 GO:0009644 GO:0009409 GO:0009738 GO:0009408 GO:0009506 GO:0030151 GO:0005886 GO:0030968 GO:0005739																																							
comp58379_c1_seq1 GO:0042744 GO:0010227 GO:0009734 GO:0009911 GO:0045892 GO:0046983 GO:0008285 GO:0043565 GO:0010150 GO:0003700 GO:0009737 GO:0010047 GO:0005634 GO:0048481																																																									
comp58380_c0_seq2 GO:1901363 GO:0097159																																																																					
comp58381_c0_seq5 GO:0007049 GO:0005634 GO:0006281																																																																				
comp58382_c0_seq1 GO:0046872																																																																						
comp58383_c0_seq6 GO:0005516																																																																						
comp58384_c0_seq10 GO:0005576 GO:0005975 GO:0004553 GO:0043169																																																																			
comp58385_c1_seq6 GO:0006626 GO:0005739																																																																					
comp58386_c0_seq4 GO:0009957 GO:0006355 GO:0043565 GO:0003700 GO:0005634 GO:0010062																																																																	
comp58387_c1_seq1 GO:0003960 GO:0009610 GO:0005829 GO:0008270 GO:0005739 GO:0000166 GO:0055114																																																																
comp58387_c2_seq2 GO:0005618 GO:0007049 GO:0005730 GO:0042802 GO:0051301 GO:0005524 GO:0008568 GO:0009860 GO:0005819 GO:0005635 GO:0009846 GO:0046686 GO:0022626 GO:0009524 GO:0005794 GO:0005886																																																							
comp58387_c3_seq1 GO:0006511 GO:0010103 GO:0005739 GO:0000822 GO:0004842 GO:0048443 GO:0002237 GO:0009734 GO:0005634																																																														
comp58388_c1_seq7 GO:0005543 GO:0008202 GO:0005634 GO:0008142																																																																			
comp58390_c1_seq1 GO:0046786 GO:0005739 GO:0046790																																																																				
comp58391_c0_seq4 GO:0005829 GO:0003677 GO:0009410 GO:0009737 GO:0030968																																																																		
comp58392_c1_seq6 GO:0009627 GO:0034976 GO:0009793 GO:0005739																																																																			
comp58393_c0_seq7 GO:0005829 GO:0006468 GO:0004674 GO:0048856 GO:0033043 GO:0005524 GO:0005515																																																																
comp58394_c2_seq8 GO:0009793 GO:0016020																																																																					
comp58395_c0_seq44 GO:0000918 GO:0006200 GO:0009941 GO:0005524 GO:0030899 GO:0009570 GO:0010020 GO:0042803																																																															
comp58396_c0_seq2 GO:0005515 GO:0016023 GO:0009825 GO:0010075 GO:0051607 GO:0032440 GO:0016021 GO:0043481 GO:0048767 GO:0005576 GO:0010817 GO:0006468 GO:0004674 GO:0000271 GO:0009736 GO:0055114 GO:0009932 GO:0005886 GO:0005524 GO:0071555																																																			
comp58397_c0_seq1 GO:0005730 GO:0006606 GO:0005618 GO:0005635 GO:0008565 GO:0005829																																																																	
comp58398_c0_seq6 GO:0005515 GO:0005635																																																																					
comp58399_c0_seq2 GO:0005737 GO:0003934 GO:0046654 GO:0005634																																																																			
comp58400_c0_seq2 GO:0008195 GO:0006629 GO:0016036																																																																				
comp58402_c1_seq1 GO:0006007 GO:0006623 GO:0009651 GO:0000325 GO:0005774 GO:0006816 GO:0046961 GO:0007030 GO:0007033 GO:0015991 GO:0005794 GO:0005886																																																											
comp58402_c3_seq3 GO:0005829 GO:0003676																																																																					
comp58404_c0_seq4 GO:0008270 GO:0006355 GO:0003677 GO:0008080 GO:0004386 GO:0005634																																																																	
comp58405_c0_seq9 GO:0010048 GO:0009086 GO:0048573 GO:0080008 GO:0051604 GO:0005834 GO:0000166 GO:0000394 GO:0016573 GO:0004402 GO:0005737 GO:0009793																																																											
comp58406_c2_seq5 GO:0004715 GO:0006468 GO:0016597 GO:0005524 GO:0004674																																																																		
comp58407_c0_seq7 GO:0052862 GO:0005681 GO:0016998 GO:0000398 GO:0052861 GO:0006351																																																																	
comp58408_c0_seq1 GO:0009507 GO:0005794																																																																					
comp58409_c0_seq6 GO:0005198 GO:0007017 GO:0009220 GO:0010020 GO:0043621 GO:0009902 GO:0005525 GO:0006184 GO:0005874 GO:0051258 GO:0009570 GO:0042802 GO:0009637 GO:0003924 GO:0009535																																																								
comp58411_c0_seq2 GO:0031348 GO:0006499 GO:0009605 GO:0009867 GO:0009862 GO:0010363 GO:0006612 GO:0050832 GO:0043069 GO:0010359 GO:0000165 GO:0048193 GO:0048527 GO:0009409 GO:0006857 GO:0009738 GO:0048366 GO:0005886 GO:0030968 GO:0005634 GO:0004722																																																		
comp58412_c0_seq4 GO:0016301 GO:0005802 GO:0016020 GO:0005794 GO:0005768 GO:0016310 GO:0032259 GO:0008168																																																															
comp58413_c0_seq1 GO:0006662 GO:0008047 GO:0009416 GO:0045454 GO:0009055 GO:0010027 GO:0000023 GO:0016671 GO:0019252 GO:0009534 GO:0009570 GO:0043085 GO:0015035																																																										
comp58413_c5_seq3 GO:0003700 GO:0043565 GO:0006355																																																																				
comp58414_c0_seq5 GO:0006346 GO:0016246 GO:0031048 GO:0016023 GO:0051567 GO:0009505 GO:0032440 GO:0048453 GO:0016021 GO:0007169 GO:0006468 GO:0004674 GO:0009570 GO:0048451 GO:0055114 GO:0005886 GO:0005524																																																						
comp58415_c0_seq2 GO:0006944 GO:0005768 GO:0009505 GO:0005484 GO:0005794 GO:0009506 GO:0016023 GO:0005886 GO:0006810 GO:0005774 GO:0016021 GO:0005802																																																											
comp58416_c0_seq1 GO:0005634																																																																						
comp58418_c0_seq3 GO:0016070 GO:0097159 GO:0016740 GO:1901363																																																																			
comp58419_c0_seq2 GO:0031047 GO:0045910 GO:0032138 GO:0008094 GO:0006275 GO:0007131 GO:0006261 GO:0003684 GO:0051567 GO:0000400 GO:0000710 GO:0000724 GO:0009507 GO:0006342 GO:0009411 GO:0006306 GO:0016444 GO:0051726 GO:0009555 GO:0000228 GO:0009408 GO:0016572 GO:0004518 GO:0045893 GO:0032042 GO:0032137 GO:0043687 GO:0006200 GO:0005524 GO:0032301 GO:0043570 GO:0005739																																							
comp58420_c1_seq1 GO:0005737 GO:0009506 GO:0005886 GO:0006468 GO:0005524 GO:0005634 GO:0004674																																																																
comp58422_c0_seq31 GO:0009739 GO:0000060 GO:0003677 GO:0046983 GO:0003700 GO:0045893 GO:0010220 GO:0005634																																																															
comp58423_c0_seq1 GO:0003677																																																																						
comp58425_c0_seq1 GO:0000085 GO:0051788 GO:0043247 GO:0031048 GO:0005515 GO:0010332 GO:0007131 GO:0043161 GO:0045492 GO:0016579 GO:0045132 GO:0009410 GO:0016571 GO:0042138 GO:0051510 GO:0010388 GO:0009640 GO:0008284 GO:0006396 GO:0016567 GO:0032204 GO:0010413 GO:0051302 GO:0032875 GO:0007276 GO:0045893 GO:0043687 GO:0007062 GO:0005634 GO:0043248																																									
comp58425_c1_seq1 GO:0005097 GO:0046686 GO:0005794 GO:0032851																																																																			
comp58426_c0_seq1 GO:0006413 GO:0003677 GO:0046740 GO:0003743 GO:0016070 GO:0005634 GO:0005829 GO:0009615																																																															
comp58427_c0_seq2 GO:0006952 GO:0005829 GO:0050789 GO:0009693 GO:0008219 GO:0017091 GO:0005515 GO:0010150 GO:0005634																																																														
comp58428_c0_seq12 GO:0005829 GO:0006468 GO:0005509 GO:0009506 GO:0009751 GO:0005524 GO:0019903 GO:0046686 GO:0004683 GO:0005634 GO:0005886																																																												
comp58429_c0_seq4 GO:0007267 GO:0005739 GO:0035196 GO:0009616 GO:0010267 GO:0016208 GO:0003824																																																																
comp58430_c0_seq9 GO:0009506 GO:0005886 GO:0004672 GO:0006468 GO:0005524																																																																		
comp58431_c0_seq1 GO:0019538																																																																						
comp58432_c0_seq4 GO:0005634 GO:0005829																																																																					
comp58433_c0_seq2 GO:0016021 GO:0016192																																																																					
comp58434_c0_seq1 GO:0080115 GO:0007264 GO:0000139 GO:0016023 GO:0030742 GO:0006888 GO:0016787 GO:0032588 GO:0015031 GO:0005525 GO:0005886																																																												
comp58435_c1_seq20 GO:0009733 GO:0006816 GO:0005739																																																																				
comp58436_c0_seq7 GO:0009507																																																																						
comp58437_c0_seq7 GO:0008270 GO:0006007 GO:0005794 GO:0005829 GO:0030244 GO:0032312 GO:0048193 GO:0003677 GO:0005634 GO:0008060 GO:0005739																																																												
comp58438_c0_seq2 GO:0016567 GO:0006468 GO:0005524 GO:0004842 GO:0004674 GO:0000151																																																																	
comp58440_c0_seq35 GO:0020037 GO:0005829 GO:0016705 GO:0004497 GO:0005506 GO:0009055 GO:0005634 GO:0055114 GO:0008270																																																														
comp58443_c1_seq2 GO:0016631 GO:0006633 GO:0009941 GO:0005507 GO:0004318 GO:0009570 GO:0009579 GO:0055114 GO:0000166																																																														
comp58444_c0_seq1 GO:0005576 GO:0004190 GO:0006508																																																																				
comp58445_c0_seq27 GO:0005739																																																																						
comp58446_c0_seq1 GO:0009744 GO:0006355 GO:0080149 GO:0043565 GO:0003700 GO:0046982																																																																	
comp58446_c1_seq8 GO:0003676 GO:0008026 GO:0009220 GO:0005524 GO:0005634																																																																		
comp58447_c0_seq4 GO:0006623 GO:0006486 GO:0016192 GO:0009536																																																																			
comp58448_c0_seq120 GO:0005097 GO:0005829 GO:0005634 GO:0032851																																																																			
comp58449_c0_seq1 GO:0000166 GO:0016569 GO:0006342 GO:0043414 GO:0043229 GO:0006260																																																																	
comp58450_c0_seq1 GO:0030125 GO:0016192 GO:0006886 GO:0005829 GO:0030131 GO:0030132																																																																	
comp58452_c0_seq2 GO:0043231 GO:0044444 GO:0043130 GO:0032266																																																																			
comp58453_c0_seq1 GO:0006355 GO:0005524 GO:0016818 GO:0005634																																																																			
comp58454_c0_seq8 GO:0055085 GO:0043231 GO:0055114 GO:0016021 GO:0009628 GO:0044444 GO:0032440 GO:0008643 GO:0005351 GO:0006950 GO:0010033 GO:0005886																																																											
comp58455_c0_seq4 GO:0006655 GO:0030785 GO:0009793 GO:0019252 GO:0019288 GO:0009902 GO:0000023 GO:0018023 GO:0016226 GO:0009570 GO:0034660 GO:0009073 GO:0016279 GO:0010027																																																									
comp58455_c2_seq2 GO:0005634 GO:0008152 GO:0016597																																																																				
comp58456_c1_seq1 GO:0009739 GO:0016707 GO:0016702 GO:0008134 GO:0009686 GO:0010114 GO:0009845 GO:0055114																																																															
comp58457_c2_seq4 GO:0044424																																																																						
comp58458_c0_seq24 GO:0009987 GO:0008152																																																																					
comp58459_c0_seq2 GO:0000911 GO:0048453 GO:0051322 GO:0048451 GO:0006355 GO:0000226																																																																	
comp58460_c0_seq5 GO:0003677 GO:0043231																																																																					
comp58461_c0_seq11 GO:0016020 GO:0009536 GO:0055085 GO:0022857																																																																			
comp58463_c0_seq2 GO:0005737 GO:0009954 GO:0048439 GO:0005634 GO:0046982 GO:0010114 GO:0042803 GO:0010227																																																															
comp58464_c0_seq2 GO:0035335 GO:0005516 GO:0000188 GO:0006661 GO:0009733 GO:0004725 GO:0008138 GO:0009737 GO:0033549 GO:0005634																																																													
comp58465_c0_seq44 GO:0010158 GO:0010154 GO:0010159 GO:0010450 GO:0009909 GO:0009933 GO:0010093																																																																
comp58466_c1_seq16 GO:0006098 GO:0019288 GO:0016117 GO:0000023 GO:0019252 GO:0009534 GO:0043085 GO:0005634																																																															
comp58467_c0_seq3 GO:0006623 GO:0008233 GO:0006511 GO:0016192 GO:0005634																																																																		
comp58468_c1_seq1 GO:0000166 GO:0042054 GO:0016571 GO:0006342 GO:0050896 GO:0070647 GO:0022402																																																																
comp58471_c0_seq3 GO:0016132 GO:0016740 GO:0005634 GO:0005516																																																																			
comp58472_c0_seq14 GO:0042546 GO:0005576 GO:0004091																																																																				
comp58473_c2_seq3 GO:0055114 GO:0046872 GO:0019288 GO:0030604 GO:0016114 GO:0070402 GO:0009570 GO:0016853 GO:0046686																																																														
comp58474_c0_seq6 GO:0000911 GO:0008565 GO:0005643 GO:0000226 GO:0005737 GO:0000059																																																																	
comp58475_c0_seq1 GO:0005634 GO:0009507 GO:0005886 GO:0055085 GO:0022857																																																																		
comp58476_c0_seq20 GO:0010106 GO:0015706 GO:0010043 GO:0010167 GO:0006826 GO:0008270																																																																	
comp58477_c0_seq3 GO:0010075 GO:0016757 GO:0009506 GO:0005618 GO:0005634 GO:0005783 GO:0005739																																																																
comp58478_c1_seq2 GO:0006499 GO:0070696 GO:0010200 GO:0000902 GO:0042742 GO:0048767 GO:0005829 GO:0046777 GO:0000151 GO:0006487 GO:0048193 GO:0004842 GO:0032880 GO:0016567 GO:0006354 GO:0043232 GO:0005634																																																						
comp58479_c0_seq6 GO:0005739																																																																						
comp58480_c1_seq37 GO:0003678 GO:0003684 GO:0006281 GO:0009295 GO:0006260 GO:0009536 GO:0004176 GO:0006508 GO:0005524 GO:0004252																																																													
comp58481_c0_seq6 GO:0031348 GO:0006499 GO:0009697 GO:0010363 GO:0006944 GO:0006612 GO:0009507 GO:0043069 GO:0032851 GO:0005097 GO:0009863 GO:0030968 GO:0009627																																																										
comp58482_c1_seq1 GO:0016787 GO:0005739 GO:0009536 GO:0005886 GO:0006629																																																																		
comp58482_c2_seq3 GO:0005829 GO:0006623 GO:0000145 GO:0009506 GO:0009860 GO:0007033 GO:0048193 GO:0009846 GO:0006904 GO:0005886																																																													
comp58483_c0_seq10 GO:0050000 GO:0003676 GO:0003720 GO:0005515 GO:0007004 GO:0007000																																																																	
comp58484_c0_seq14 GO:0009987 GO:0045087																																																																					
comp58485_c0_seq7 GO:0010363 GO:0006468 GO:0016021 GO:0004703 GO:0007169 GO:0009963 GO:0005524 GO:0006612 GO:0005886																																																														
comp58486_c0_seq1 GO:0009416 GO:0004871 GO:0007165 GO:0005886																																																																			
comp58487_c0_seq2 GO:0006814 GO:0055114 GO:0030955 GO:0009414 GO:0005739 GO:0009651 GO:0009926 GO:0009941 GO:0009705 GO:0000287 GO:0004427 GO:0048366 GO:0032440 GO:0010008 GO:0015992 GO:0009678 GO:0005887																																																						
comp58489_c0_seq1 GO:0006979 GO:0006511 GO:0051537 GO:0008137 GO:0005747 GO:0046872 GO:0051788 GO:0080129 GO:0009055 GO:0042773 GO:0051539 GO:0009630 GO:0009853 GO:0009507 GO:0009793																																																								
comp58490_c1_seq5 GO:0050896 GO:0008168																																																																					
comp58490_c4_seq4 GO:0008234 GO:0042393 GO:0005739 GO:0016578 GO:0009536 GO:0031491 GO:0009630 GO:0045892 GO:0005634 GO:0007346																																																													
comp58491_c0_seq2 GO:0030246 GO:0005886 GO:0048544 GO:0006468 GO:0005524 GO:0004674																																																																	
comp58492_c1_seq2 GO:0009739 GO:0006970 GO:0005198 GO:0005886																																																																			
comp58492_c3_seq3 GO:0044424																																																																						
comp58493_c0_seq12 GO:0016558 GO:0006635 GO:0016020 GO:0005739																																																																			
comp58494_c1_seq1 GO:0005739 GO:0016226 GO:0004830 GO:0010027 GO:0010228 GO:0009658 GO:0006436 GO:0048481 GO:0005524 GO:0009570 GO:0009793																																																												
comp58495_c1_seq6 GO:0007623 GO:0004556 GO:0033910 GO:0005509 GO:0005983 GO:0009570 GO:0005576																																																																
comp58496_c1_seq3 GO:0016023 GO:0003723 GO:0000398 GO:0030529 GO:0000166																																																																		
comp58497_c1_seq6 GO:0008270 GO:0003723																																																																					
comp58497_c3_seq1 GO:0050253 GO:0008152 GO:0080031 GO:0004091 GO:0080032 GO:0080030																																																																	
comp58499_c0_seq2 GO:0006995 GO:0048519 GO:0007155 GO:0009944 GO:0045597 GO:0045010 GO:0006355 GO:0010075 GO:0010051 GO:0009965 GO:0010090 GO:0008284 GO:0080060 GO:0043565 GO:0048765 GO:0048263 GO:0003700 GO:0048439 GO:0005634 GO:0009733 GO:0010067 GO:0010072 GO:0071555 GO:0010089																																															
comp58500_c1_seq6 GO:0003676 GO:0008026 GO:0005524																																																																				
comp58502_c0_seq11 GO:0005975 GO:0035251 GO:0044237																																																																				
comp58503_c0_seq8 GO:0042299 GO:0042300 GO:0019745																																																																				
comp58504_c1_seq1 GO:0004697 GO:0006468 GO:0005524																																																																				
comp58505_c0_seq14 GO:0005773																																																																						
comp58506_c0_seq1 GO:0048573 GO:0009536 GO:0003677 GO:0008652 GO:0000956 GO:0006221 GO:0016310 GO:0033862																																																															
comp58506_c2_seq3 GO:0009753 GO:0009739 GO:0008270 GO:0009651 GO:0003677 GO:0009733 GO:0009723 GO:0046686																																																															
comp58506_c3_seq6 GO:0005794 GO:0016020 GO:0003824																																																																				
comp58507_c0_seq71 GO:0003676 GO:0000166																																																																					
comp58508_c0_seq3 GO:0050508 GO:0016020 GO:0005794																																																																				
comp58509_c0_seq1 GO:0004643 GO:0006164 GO:0003937 GO:0009409 GO:0009220 GO:0009570 GO:0010319																																																																
comp58510_c0_seq3 GO:0004683 GO:0046777 GO:0005524 GO:0005634																																																																			
comp58511_c0_seq2 GO:0048437 GO:0006355 GO:0003677 GO:0046983 GO:0048438 GO:0009734 GO:0005634																																																																
comp58512_c0_seq1 GO:0010102 GO:0045595 GO:0016049 GO:0010090 GO:0071555 GO:0009506 GO:0010014 GO:0009536 GO:0009733 GO:0048589 GO:0007155 GO:0048765 GO:0045010 GO:0005634 GO:0005886																																																								
comp58513_c0_seq1 GO:0010155 GO:0006655 GO:0007131 GO:0009793 GO:0006400 GO:0051539 GO:0009691 GO:0016740 GO:0032440 GO:0009507 GO:0016226 GO:0046777 GO:0055114 GO:0009073 GO:0005739																																																								
comp58514_c0_seq5 GO:0046777 GO:0004674 GO:0005730 GO:0005524 GO:0004715 GO:0005737 GO:0050832 GO:0005886																																																															
comp58514_c1_seq1 GO:0080090 GO:0016301 GO:0048519 GO:0031323 GO:0009617 GO:0043067 GO:0071310 GO:0006796 GO:0009751 GO:0045088 GO:0007165 GO:0006464 GO:0006725 GO:1901360 GO:0033554 GO:0005886 GO:0044249 GO:0060255 GO:0009627																																																				
comp58516_c1_seq1 GO:0005488 GO:0006355																																																																					
comp58517_c0_seq2 GO:0043044 GO:0009630 GO:0000226 GO:0008094 GO:0006346 GO:0016246 GO:0005515 GO:0006261 GO:0031491 GO:0045492 GO:0000911 GO:0051567 GO:0016585 GO:0033044 GO:0016740 GO:0005829 GO:0004386 GO:0008284 GO:0006306 GO:0003677 GO:0007126 GO:0010228 GO:0010413 GO:0051322 GO:0009553 GO:0016572 GO:0016049 GO:0005524																																											
comp58518_c0_seq1 GO:0006468 GO:0005739 GO:0005524 GO:0007165 GO:0005576 GO:0004675 GO:0005886																																																																
comp58519_c0_seq1 GO:0006468 GO:0004674 GO:0016021 GO:0010075 GO:0007169 GO:0005524 GO:0005886																																																																
comp58519_c1_seq1 GO:0005975 GO:0051287 GO:0047952 GO:0004367 GO:0046168 GO:0005829 GO:0009331 GO:0055114																																																															
comp58520_c2_seq1 GO:0016491 GO:0042744 GO:0009055 GO:0055114																																																																			
comp58521_c0_seq9 GO:0019219 GO:0050896 GO:0033044 GO:0000723 GO:0060255 GO:0007059 GO:0007127																																																																
comp58522_c0_seq1 GO:0005618 GO:0055114 GO:0033772 GO:0015706 GO:0005739 GO:0010106 GO:0009055 GO:0019825 GO:0006826 GO:0010167 GO:0020037 GO:0010043 GO:0009507 GO:0005506 GO:0005783 GO:0005886																																																							
comp58522_c1_seq5 GO:0006351 GO:0005634																																																																					
comp58523_c0_seq3 GO:0005829 GO:0007126 GO:0003676 GO:0006259 GO:0033044 GO:0005739 GO:0005730 GO:0009506 GO:0008026 GO:0009165 GO:0005524 GO:0030529 GO:0016020 GO:0009793																																																									
comp58525_c0_seq2 GO:0003676																																																																						
comp58526_c0_seq3 GO:0005634 GO:0008270																																																																					
comp58527_c0_seq1 GO:0009294 GO:0009536																																																																					
comp58527_c1_seq1 GO:0005789 GO:0004683 GO:0005777 GO:0005509 GO:0006468 GO:0005524																																																																	
comp58528_c0_seq8 GO:0004181 GO:0008270 GO:0010103 GO:0006508 GO:0003700 GO:0042127 GO:0001708 GO:0010082 GO:0005576 GO:0005634																																																													
comp58529_c0_seq27 GO:0009507																																																																						
comp58531_c0_seq6 GO:0016036 GO:0016120 GO:0016123 GO:0010323 GO:0015995 GO:0006402 GO:0004654 GO:0006396 GO:0009570 GO:0003723 GO:0000175																																																												
comp58531_c3_seq24 GO:0003899 GO:0005829 GO:0008270 GO:0009506 GO:0006606 GO:0006354 GO:0003677 GO:0019538 GO:0006406 GO:0005634																																																													
comp58532_c0_seq5 GO:0005829 GO:0005634																																																																					
comp58534_c0_seq3 GO:0010103 GO:0004383 GO:0009611 GO:0005515 GO:0000166 GO:0009873 GO:0001653 GO:0010200 GO:0004672 GO:0009753 GO:0016310 GO:0042742 GO:0042277 GO:0052542 GO:0009738 GO:0009506 GO:0002237 GO:0005886 GO:0045087 GO:0048443 GO:0035556																																																		
comp58535_c0_seq29 GO:0000245																																																																						
comp58536_c1_seq14 GO:0055085 GO:0046715 GO:0015204 GO:0015168 GO:0010264 GO:0015250 GO:0044425 GO:0080029 GO:0046713 GO:0005886																																																													
comp58537_c0_seq2 GO:0008299 GO:0004421																																																																					
comp58539_c2_seq1 GO:0009793 GO:0016779 GO:0005739																																																																				
comp58540_c0_seq4 GO:0003777 GO:0000911 GO:0051329 GO:0005875 GO:0051322 GO:0005874 GO:0016572 GO:0000226 GO:0005524 GO:0007018 GO:0009555 GO:0005515 GO:0010583 GO:0009558 GO:0008283 GO:0005737																																																							
comp58541_c0_seq2 GO:0005730 GO:0042254 GO:0005739 GO:0006396 GO:0003963																																																																		
comp58542_c0_seq2 GO:0048573 GO:0080008 GO:0006626 GO:0006499 GO:0000166 GO:0005737																																																																	
comp58543_c0_seq20 GO:0016132 GO:0006857 GO:0005794 GO:0030158 GO:0005886 GO:0016051 GO:0006084 GO:0008375 GO:0016126																																																														
comp58544_c0_seq1 GO:0016021 GO:0008271 GO:0008272 GO:0055085																																																																			
comp58545_c0_seq1 GO:0005774 GO:0006499 GO:0006094 GO:0009934 GO:0048046 GO:0006457 GO:0042542 GO:0006833 GO:0009414 GO:0016023 GO:0005788 GO:0009306 GO:0010075 GO:0009651 GO:0009507 GO:0005794 GO:0006972 GO:0005829 GO:0007030 GO:0006096 GO:0034976 GO:0051082 GO:0009644 GO:0046686 GO:0009409 GO:0009408 GO:0009506 GO:0005886 GO:0005634 GO:0005524 GO:0005739																																								
comp58547_c0_seq1 GO:0005975 GO:0051287 GO:0047952 GO:0004367 GO:0046168 GO:0005829 GO:0009331 GO:0055114																																																															
comp58548_c0_seq12 GO:0045910 GO:0032138 GO:0009536 GO:0008094 GO:0005515 GO:0006275 GO:0007131 GO:0003684 GO:0000400 GO:0000710 GO:0006290 GO:0048453 GO:0009411 GO:0051726 GO:0048451 GO:0000228 GO:0032137 GO:0006200 GO:0006270 GO:0005524 GO:0032301 GO:0043570 GO:0005739																																																
comp58549_c0_seq1 GO:0005829 GO:0005618 GO:0010498 GO:0005739 GO:0007010 GO:0006435 GO:0004829 GO:0005524 GO:0006094 GO:0009507 GO:0005794 GO:0005886																																																											
comp58551_c0_seq10 GO:0006000 GO:0004331 GO:0003873 GO:0016310 GO:0006003 GO:0005524																																																																	
comp58552_c0_seq1 GO:0043090 GO:0006499 GO:0016616 GO:0048037 GO:0006888 GO:0005829 GO:0055114 GO:0000166																																																															
comp58553_c0_seq1 GO:0035091 GO:0005737 GO:0007165 GO:0008270																																																																			
comp58553_c1_seq3 GO:0005829 GO:0005730 GO:0004612 GO:0009965 GO:0003677 GO:0005524 GO:0016310 GO:0016301 GO:0009817 GO:0006094 GO:0046686 GO:0016036 GO:0016020																																																										
comp58554_c1_seq3 GO:0006979 GO:0005829 GO:0005507 GO:0005618 GO:0008270 GO:0009414 GO:0005509 GO:0005739 GO:0009651 GO:0009409 GO:0005544 GO:0004601 GO:0009408 GO:0009579 GO:0005524 GO:0009737 GO:0009570 GO:0042803 GO:0005773 GO:0046686 GO:0005886 GO:0048046																																																	
comp58554_c3_seq4 GO:0008353 GO:0005886 GO:0006468 GO:0005524																																																																			
comp58554_c4_seq2 GO:0046872																																																																						
comp58555_c1_seq9 GO:0046872																																																																						
comp58557_c0_seq5 GO:0009737 GO:0007067 GO:0008270																																																																				
comp58558_c0_seq26 GO:0006468 GO:0004674 GO:0007169 GO:0016491 GO:0016023 GO:0005524 GO:0009507 GO:0005886																																																															
comp58559_c2_seq11 GO:0003700 GO:0005634 GO:0006355																																																																				
comp58560_c0_seq10 GO:0010025 GO:0034976 GO:0010103 GO:0009627 GO:0010143 GO:0004467 GO:0001676 GO:0005783 GO:0005634 GO:0031957																																																													
comp58561_c0_seq1 GO:0015385 GO:0006623 GO:0016021 GO:0035725 GO:0012505 GO:0030007 GO:0009507 GO:0006885 GO:0030104 GO:0005783																																																													
comp58562_c0_seq4 GO:0046786																																																																						
comp58563_c1_seq2 GO:0009626 GO:0009617 GO:0050794 GO:0045088 GO:0016020																																																																		
comp58563_c3_seq4 GO:0004843 GO:0006511 GO:0004221 GO:0005634 GO:0008270 GO:0009536 GO:0005739																																																																
comp58564_c0_seq8 GO:0003700 GO:0003677 GO:0005634 GO:0006355																																																																			
comp58564_c1_seq1 GO:0030127 GO:0006886 GO:0006888 GO:0008270 GO:0005215																																																																		
comp58564_c2_seq1 GO:0003677 GO:0006289 GO:0005634																																																																				
comp58565_c0_seq14 GO:0010413 GO:0005739 GO:0045492 GO:0005576 GO:0009736																																																																		
comp58566_c1_seq5 GO:0043484 GO:0003723 GO:0055114 GO:0006417 GO:0000932 GO:0000166 GO:0032440 GO:0009846 GO:0005634																																																														
comp58567_c0_seq1 GO:0005488 GO:0003824 GO:0006281																																																																				
comp58568_c0_seq2 GO:0006107 GO:0005886 GO:0015977 GO:0000287 GO:0006099 GO:0032440 GO:0009507 GO:0005829 GO:0048046 GO:0008964																																																													
comp58569_c0_seq6 GO:0005576																																																																						
comp58570_c1_seq2 GO:0005829 GO:0060151 GO:0051646 GO:0030048 GO:0051645 GO:0005509 GO:0005886																																																																
comp58570_c3_seq1 GO:0006511 GO:0005634 GO:0008270																																																																				
comp58571_c0_seq9 GO:0008559 GO:0006200 GO:0005524 GO:0016020																																																																			
comp58572_c0_seq1 GO:0005829 GO:0009620 GO:0071470 GO:0009651 GO:0009536 GO:0043687 GO:0008081 GO:0003700 GO:0045893 GO:0042542 GO:0005634 GO:0005886																																																											
comp58573_c0_seq1 GO:0005773																																																																						
comp58573_c1_seq2 GO:0005975 GO:0005829 GO:0005773 GO:0009505 GO:0004563 GO:0043169																																																																	
comp58574_c0_seq1 GO:0004715 GO:0030247 GO:0005886 GO:0006468 GO:0005524 GO:0004674																																																																	
comp58575_c0_seq2 GO:0005739 GO:0009507 GO:0015979																																																																				
comp58576_c0_seq4 GO:0009750 GO:0004871 GO:0009749 GO:0009744 GO:0005834 GO:2000067 GO:0006184 GO:0031683 GO:0001664 GO:0009737 GO:0007188 GO:0003924 GO:0005634 GO:0010555 GO:0019001																																																								
comp58577_c2_seq31 GO:0006098 GO:0010303 GO:0019252 GO:0004556 GO:0009664 GO:0005983 GO:0019288 GO:0000023 GO:0016556 GO:0051060 GO:0009570 GO:0043169 GO:0015996 GO:0019761 GO:0005886																																																								
comp58578_c0_seq2 GO:0005773 GO:0004177 GO:0009570 GO:0006508 GO:0008270 GO:0008237 GO:0005739																																																																
comp58580_c1_seq26 GO:0044444 GO:0043231																																																																					
comp58580_c6_seq3 GO:0050660 GO:0009611 GO:0006635 GO:0000166 GO:0010363 GO:0001676 GO:0009753 GO:0006612 GO:0050832 GO:0003997 GO:0043069 GO:0005777 GO:0005829 GO:0009555 GO:0009695 GO:0002213 GO:0046686 GO:0009506 GO:0003995 GO:0009863																																																			
comp58581_c0_seq1 GO:0006355 GO:0009688																																																																					
comp58582_c0_seq5 GO:0005622																																																																						
comp58585_c0_seq1 GO:0009407 GO:0005773 GO:0006950 GO:0005739 GO:0010583																																																																		
comp58585_c2_seq4 GO:0005509 GO:0006623 GO:0000139 GO:0031902 GO:0017119 GO:0005802 GO:0005773 GO:0030665 GO:0005887																																																														
comp58586_c1_seq9 GO:0008970 GO:0009705 GO:0009506 GO:0009959 GO:0009660 GO:0009590																																																																	
comp58588_c0_seq10 GO:0031304 GO:0050660 GO:0005777 GO:0010264 GO:0071482 GO:0055114 GO:0003954																																																																
comp58589_c0_seq1 GO:0016021 GO:0009536																																																																					
comp58590_c0_seq9 GO:0051510 GO:0006468 GO:0004674 GO:0005524 GO:0009507 GO:0030048																																																																	
comp58591_c0_seq21 GO:0008233 GO:0044260 GO:0044238																																																																				
comp58592_c0_seq5 GO:0005515																																																																						
comp58593_c0_seq2 GO:0006355 GO:0003677 GO:0046983 GO:0009734 GO:0005634																																																																		
comp58595_c0_seq1 GO:0048046																																																																						
comp58596_c0_seq3 GO:0009416 GO:0004871 GO:0007165 GO:0005886																																																																			
comp58597_c0_seq1 GO:0005802 GO:0005794 GO:0005768 GO:0016757																																																																			
comp58599_c1_seq42 GO:0003723 GO:0030529 GO:0000166																																																																				
comp58599_c2_seq2 GO:0006511 GO:0005747 GO:0051788 GO:0080129 GO:0009853																																																																		
comp58600_c0_seq4 GO:0006952 GO:0043531 GO:0007165 GO:0005622																																																																			
comp58601_c0_seq5 GO:0005829 GO:0004849 GO:0016773 GO:0005524 GO:0006222 GO:0009737 GO:0016310																																																																
comp58601_c4_seq28 GO:0055085 GO:0000302 GO:0008559 GO:0016021 GO:0010039 GO:0006200 GO:0009941 GO:0015996 GO:0005524 GO:0055072																																																													
comp58602_c0_seq3 GO:0009888 GO:0071554 GO:0033043 GO:0048513 GO:0009653 GO:0044237																																																																	
comp58603_c0_seq4 GO:0000911 GO:0000280 GO:0010389 GO:0005739 GO:0000166 GO:0007000 GO:0006275																																																																
comp58604_c0_seq1 GO:0048767 GO:0010480 GO:0009414 GO:0043481 GO:0009825 GO:0000186 GO:0007169 GO:0009926 GO:0009570 GO:0010075 GO:0048229 GO:0005829 GO:0033612 GO:0019252 GO:0000023 GO:0004709 GO:0009740 GO:0010162 GO:0005886 GO:0016021 GO:0043621 GO:0055114 GO:0008361 GO:0005524 GO:0009934 GO:0007389 GO:0043169 GO:0009932 GO:0007020 GO:0000165 GO:0005634 GO:0005983 GO:0009664 GO:0009832 GO:0032440 GO:0016161																																			
comp58605_c1_seq6 GO:0035299 GO:0010264 GO:0042742 GO:0005524 GO:0016310 GO:0032942 GO:0050832 GO:0051607 GO:0030643 GO:0005634																																																													
comp58606_c0_seq2 GO:0048589 GO:0007155 GO:0043231 GO:0045010 GO:0004672 GO:0016926 GO:0016021 GO:0010090 GO:0006468 GO:0050665 GO:0048527 GO:0048765 GO:0010228 GO:0044444 GO:0005524 GO:0071555																																																							
comp58608_c0_seq2 GO:0031072 GO:0005739 GO:0006457 GO:0035196 GO:0009616 GO:0010050 GO:0010267 GO:0051082 GO:0016020																																																														
comp58609_c0_seq2 GO:0008526 GO:0006810 GO:0010053 GO:0006656 GO:0009932 GO:0009908 GO:0005794																																																																
comp58610_c0_seq1 GO:0006468 GO:0005524 GO:0004674																																																																				
comp58610_c3_seq1 GO:0005886 GO:0004672 GO:0006468 GO:0005524																																																																			
comp58610_c4_seq1 GO:0005829 GO:0006777 GO:0018283 GO:0006461 GO:0006767 GO:0031071 GO:0005759 GO:0042803 GO:0030170 GO:0005634 GO:0006534																																																												
comp58611_c0_seq1 GO:0004849 GO:0009909 GO:0048449 GO:0016773 GO:0005524 GO:0006222 GO:0016570 GO:0009737 GO:0016310 GO:0009507																																																													
comp58613_c0_seq9 GO:0003779 GO:0016459 GO:0005524 GO:0003774																																																																			
comp58614_c0_seq1 GO:0048522 GO:0006606 GO:0008565 GO:0005634 GO:0005829 GO:0022402 GO:0009536 GO:0006396 GO:0009410																																																														
comp58615_c0_seq7 GO:0003723 GO:0006397 GO:0005634 GO:0000166																																																																			
comp58616_c0_seq1 GO:0034968 GO:0005739 GO:0009909 GO:0009640 GO:0009220 GO:0010388 GO:0000085																																																																
comp58617_c1_seq2 GO:0042802 GO:0004252 GO:0016023 GO:0032440 GO:0005576 GO:0006508 GO:0043086 GO:0055114																																																															
comp58618_c0_seq8 GO:0005794 GO:0009507 GO:0016757																																																																				
comp58619_c0_seq1 GO:0019725 GO:0010182 GO:0005525 GO:0048825 GO:0030048 GO:0006325 GO:0051646 GO:0051301 GO:0006626 GO:0050826 GO:0010638 GO:0016567 GO:0005829 GO:0006312 GO:0033044 GO:0009845 GO:0010090 GO:0060151 GO:0010162 GO:0019915 GO:0051645 GO:0007264 GO:0000741 GO:0010228 GO:0009560 GO:0009640 GO:0009909 GO:0007131 GO:0005741 GO:0003924 GO:0009933 GO:0005509 GO:0006184 GO:0051604 GO:0009860																																				
comp58620_c1_seq15 GO:0006437 GO:0004831 GO:0005524 GO:0009536																																																																			
comp58621_c1_seq7 GO:0006378 GO:0009911 GO:0005515 GO:0005737 GO:0005634																																																																		
comp58622_c0_seq3 GO:0005488 GO:0048518 GO:0002119 GO:0048513 GO:0040009 GO:0044702 GO:0009790																																																																
comp58623_c0_seq4 GO:0005829 GO:0008152 GO:0004575 GO:0005634 GO:0033926																																																																		
comp58624_c0_seq1 GO:0051287 GO:0006511 GO:0016049 GO:0008137 GO:0005747 GO:0051788 GO:0000902 GO:0080129 GO:0051539 GO:0006120 GO:0006499 GO:0048193 GO:0009853 GO:0010181																																																									
comp58625_c0_seq1 GO:0016023 GO:0009055 GO:0005506 GO:0020037 GO:0009507 GO:0019825 GO:0070330 GO:0055114																																																															
comp58626_c0_seq4 GO:0009088 GO:0030170 GO:0004795 GO:0009570 GO:0005829																																																																		
comp58627_c0_seq1 GO:0046855 GO:0010305 GO:0052659 GO:0009737 GO:0052658 GO:0046854 GO:0004445 GO:0010588 GO:0010067 GO:0032957																																																													
comp58628_c1_seq1 GO:0005802 GO:0016491 GO:0005794 GO:0005768 GO:0008270 GO:0016757																																																																	
comp58630_c1_seq5 GO:0005768 GO:0009505 GO:0005794 GO:0009506 GO:0005886 GO:0006499 GO:0005774 GO:0016021 GO:0005576 GO:0005802 GO:0005739																																																												
comp58631_c1_seq7 GO:0010162 GO:0009845 GO:0010114 GO:0042752 GO:0009933 GO:0010099 GO:0009909 GO:0010228 GO:0009637 GO:0016567 GO:0019915 GO:0050826 GO:0010182 GO:0005634 GO:0009793 GO:0009873																																																							
comp58634_c0_seq4 GO:0016746 GO:0008152 GO:0005739																																																																				
comp58635_c0_seq5 GO:0005737 GO:0042545 GO:0003676 GO:0009664 GO:0048573 GO:0006810 GO:0000166																																																																
comp58636_c0_seq5 GO:0003723 GO:0006396 GO:0005634																																																																				
comp58637_c0_seq8 GO:0005768 GO:0005794 GO:0009616 GO:0005634 GO:0010050 GO:0005802																																																																	
comp58638_c0_seq8 GO:0008287 GO:0046872 GO:0016301 GO:0004722 GO:0005886 GO:0016310 GO:0006470 GO:0005634																																																															
comp58639_c0_seq2 GO:0042802 GO:0004252 GO:0016023 GO:0005618 GO:0008356 GO:0006508 GO:0043086 GO:0048046																																																															
comp58640_c2_seq5 GO:0005488 GO:0007165 GO:0009639																																																																				
comp58641_c0_seq7 GO:0005488 GO:0050789 GO:0009791 GO:0048608																																																																			
comp58642_c0_seq2 GO:0016020 GO:0005739																																																																					
comp58642_c1_seq3 GO:0010193 GO:0015416 GO:0006200 GO:0015692 GO:0005524 GO:0015417 GO:0080168 GO:0005886																																																															
comp58643_c0_seq3 GO:0000085 GO:0080019 GO:0009630 GO:0009611 GO:0005515 GO:0016579 GO:0010345 GO:0009410 GO:0016571 GO:0000724 GO:0009651 GO:0010018 GO:0009507 GO:0010388 GO:0009640 GO:0006396 GO:0016567 GO:0050062 GO:0003700 GO:0010212 GO:0045893 GO:0042753 GO:0005886 GO:0005634																																															
comp58644_c1_seq4 GO:0005840 GO:0003735 GO:0006412																																																																				
comp58645_c0_seq1 GO:0005768 GO:0005794 GO:0030246 GO:0006013 GO:0004572 GO:0008270 GO:0005802 GO:0009536 GO:0006487																																																														
comp58646_c0_seq10 GO:0042744 GO:0045454 GO:0009570																																																																				
comp58647_c0_seq4 GO:0016049 GO:0009507 GO:0009832 GO:0030243																																																																			
comp58649_c0_seq3 GO:0016558 GO:0009506 GO:0006635 GO:0006486 GO:0005886																																																																		
comp58650_c0_seq11 GO:0003676 GO:0000956 GO:0006487																																																																				
comp58651_c1_seq26 GO:0006355																																																																						
comp58652_c1_seq1 GO:0005576 GO:0009690 GO:0005886																																																																				
comp58653_c0_seq7 GO:0005774 GO:0009506 GO:0005886																																																																				
comp58654_c0_seq6 GO:0007000 GO:0009957 GO:0016458 GO:0000911 GO:0045010 GO:0008283 GO:0051225 GO:0006084 GO:0051322 GO:0043229 GO:0009909 GO:0034968 GO:0000280																																																										
comp58655_c1_seq16 GO:0004672 GO:0006468																																																																					
comp58656_c0_seq8 GO:0045430 GO:0006468 GO:0004674 GO:0009813 GO:0016023 GO:0005524 GO:0004713 GO:0005886																																																															
comp58657_c0_seq4 GO:0005634 GO:0008270 GO:0016874																																																																				
comp58657_c1_seq1 GO:0005576 GO:0016023 GO:0004091 GO:0006629																																																																			
comp58659_c0_seq1 GO:0001510 GO:0003723 GO:0006626 GO:0000478 GO:0005737 GO:0000175																																																																	
comp58660_c0_seq1 GO:0005730 GO:0003676 GO:0005739																																																																				
comp58661_c1_seq1 GO:0044238 GO:0044260																																																																					
comp58662_c0_seq14 GO:0016021 GO:0055085																																																																					
comp58663_c0_seq1 GO:0005730 GO:0008026 GO:0003676 GO:0005777 GO:0005886 GO:0005524 GO:0009507																																																																
comp58665_c0_seq6 GO:0006261 GO:0008270																																																																					
comp58666_c1_seq17 GO:0000085 GO:0016301 GO:0005515 GO:0016579 GO:0010093 GO:0016571 GO:0016310 GO:0010388 GO:0016567 GO:0008180 GO:0010100 GO:0010387 GO:0031347 GO:0045893 GO:0009733																																																								
comp58667_c0_seq2 GO:0004672 GO:0031348 GO:0009627 GO:0006499 GO:0009863 GO:0016020 GO:0009697																																																																
comp58669_c0_seq11 GO:0005458 GO:0015784 GO:0005794 GO:0005886 GO:0016021																																																																		
comp58670_c1_seq1 GO:0046872 GO:0009765 GO:0030076 GO:0009523 GO:0018298 GO:0016168 GO:0016021 GO:0009522 GO:0009535 GO:0005198																																																													
comp58670_c2_seq3 GO:0009536																																																																						
comp58670_c3_seq13 GO:0055085 GO:0016021 GO:0005743 GO:0042626 GO:0016459 GO:0006200 GO:0006879 GO:0003774 GO:0000166 GO:0046686 GO:0030048 GO:0005886																																																											
comp58671_c2_seq11 GO:0010048 GO:0000956																																																																					
comp58672_c0_seq14 GO:0009507																																																																						
comp58673_c0_seq1 GO:0006468 GO:0008353 GO:0004713 GO:0005524 GO:0045727 GO:0005737 GO:0005634 GO:0006487																																																															
comp58674_c0_seq1 GO:0005737 GO:0007018 GO:0005524 GO:0003777 GO:0005874																																																																		
comp58675_c2_seq1 GO:0046872																																																																						
comp58676_c2_seq18 GO:0044260 GO:0090304 GO:0044424																																																																				
comp58678_c0_seq2 GO:0016021 GO:0051996 GO:0008610 GO:0004310																																																																			
comp58679_c0_seq21 GO:0016301																																																																						
comp58680_c0_seq14 GO:0046488																																																																						
comp58680_c2_seq1 GO:0031348 GO:0006499 GO:0009595 GO:0009611 GO:0009867 GO:0009697 GO:0006862 GO:0009862 GO:0005484 GO:0000911 GO:0006944 GO:0010363 GO:0010310 GO:0009612 GO:0002679 GO:0010200 GO:0015802 GO:0043900 GO:0006612 GO:0050832 GO:0042742 GO:0016021 GO:0009507 GO:0009625 GO:0043069 GO:0002831 GO:0043090 GO:0015696 GO:0000165 GO:0006820 GO:0006888 GO:0009695 GO:0009737 GO:0009504 GO:0005886 GO:0030968 GO:0043269																																		
comp58681_c1_seq1 GO:0050896 GO:0043231 GO:0044444																																																																				
comp58682_c0_seq5 GO:0051287 GO:0055114 GO:0008270 GO:0016652 GO:0050897 GO:0004471 GO:0006108 GO:0005524 GO:0005759 GO:0042803 GO:0008948 GO:0009507 GO:0016619																																																										
comp58683_c3_seq4 GO:0006486 GO:0005634 GO:0009536																																																																				
comp58684_c0_seq3 GO:0031047 GO:0006098 GO:0016442 GO:0009306 GO:0009651 GO:0009507 GO:0005618 GO:0005829 GO:0005635 GO:0030244 GO:0048193 GO:0009845 GO:0046686 GO:0003723 GO:0004518 GO:0009506 GO:0005783 GO:0009686 GO:0005886																																																				
comp58686_c1_seq1 GO:0043161 GO:0005829 GO:0009651 GO:0051788 GO:0009409 GO:0080129 GO:0004298 GO:0005774 GO:0006972 GO:0006833 GO:0007030 GO:0006096 GO:0019773 GO:0006094 GO:0009853 GO:0046686 GO:0005634 GO:0005886 GO:0048046																																																				
comp58686_c2_seq24 GO:0003676 GO:0005634 GO:0008270 GO:0006355																																																																			
comp58687_c0_seq3 GO:0006979 GO:0006662 GO:0003756 GO:0005739 GO:0030244 GO:0045454 GO:0009055 GO:0005774 GO:0006499 GO:0048193 GO:0005576 GO:0009507 GO:0004579 GO:0005794 GO:0005783 GO:0015035 GO:0005886																																																						
comp58688_c0_seq2 GO:0007015 GO:0003779 GO:0005886 GO:0010119 GO:0005634 GO:0032880																																																																	
comp58690_c0_seq11 GO:0050660 GO:0009941 GO:0005886																																																																				
comp58691_c0_seq12 GO:0004629 GO:0006629 GO:0006470 GO:0035556 GO:0030176 GO:0031965 GO:0046872 GO:0016607 GO:0006913 GO:0004722 GO:0005515 GO:0046686 GO:0010017																																																										
comp58692_c0_seq2 GO:0005507 GO:0005576 GO:0008447 GO:0055114																																																																			
comp58693_c0_seq2 GO:0016706 GO:0032259 GO:0005634 GO:0003677 GO:0055114 GO:0008270 GO:0008168																																																																
comp58693_c1_seq12 GO:0016567 GO:0005524 GO:0004842																																																																				
comp58694_c1_seq5 GO:0009793 GO:0009506 GO:0016925 GO:0005524 GO:0005634 GO:0005829 GO:0019948																																																																
comp58695_c0_seq1 GO:0005524 GO:0004386 GO:0003677																																																																				
comp58695_c1_seq5 GO:0046488 GO:0009409 GO:0048015 GO:0006970 GO:0006486 GO:0042578 GO:0005737 GO:0009644 GO:0005634																																																														
comp58695_c3_seq2 GO:0008152 GO:0016787 GO:0009507																																																																				
comp58696_c0_seq2 GO:0001708 GO:0005515 GO:0006950 GO:0090421 GO:0009880																																																																		
comp58697_c0_seq1 GO:0044272 GO:0009108 GO:0008652 GO:0009695 GO:0009697 GO:0005506 GO:0019760 GO:0016117 GO:0005351 GO:0010114 GO:0010155 GO:0010363 GO:0010200 GO:0031348 GO:0009072 GO:0009570 GO:0050832 GO:0006098 GO:0009867 GO:0010304 GO:0019684 GO:0009941 GO:0009644 GO:0009595 GO:0042742 GO:0006612 GO:0019252 GO:0009744 GO:0006636 GO:0046429 GO:0002831 GO:0010310 GO:0010218 GO:0009637 GO:0009657 GO:0009401 GO:0009862 GO:0006766 GO:0006655 GO:0006417 GO:0051539 GO:0000096 GO:0045893 GO:0009106 GO:0009409 GO:0019216 GO:0015995 GO:0000165 GO:0005634 GO:0043900 GO:0019288 GO:0006546																			
comp58698_c1_seq12 GO:0016556 GO:0010103 GO:0000023 GO:0019252 GO:0009570 GO:0043085																																																																	
comp58699_c1_seq2 GO:0046914 GO:0016491 GO:0005739 GO:0055114 GO:0009507																																																																		
comp58699_c2_seq13 GO:0030173 GO:0010256 GO:0005768 GO:0016023 GO:0009863 GO:0005802 GO:0009826 GO:0009969 GO:0016757 GO:0042353																																																													
comp58700_c0_seq12 GO:0031047 GO:0007000 GO:0042393 GO:0006275 GO:0008270 GO:0010429 GO:0000911 GO:0051567 GO:0090309 GO:0000724 GO:0008283 GO:0010424 GO:0010369 GO:0016444 GO:0004842 GO:0016567 GO:0051726 GO:0010228 GO:0009555 GO:0010385 GO:0031508 GO:0016572 GO:0008327 GO:0003682 GO:0006270 GO:0000280 GO:0005634 GO:0010428																																											
comp58701_c1_seq2 GO:0047262 GO:0005794																																																																					
comp58702_c0_seq18 GO:0009416 GO:0004871 GO:0007165																																																																				
comp58703_c0_seq1 GO:0005507 GO:0005618 GO:0006105 GO:0005739 GO:0003878 GO:0006104 GO:0009220 GO:0006626 GO:0006099 GO:0004775 GO:0005524 GO:0004776 GO:0046686 GO:0048037																																																									
comp58703_c3_seq4 GO:0055085 GO:0015797 GO:0005354 GO:0015148 GO:0055114 GO:0031348 GO:0015168 GO:0016021 GO:0043090 GO:0005355 GO:0015753 GO:0015576 GO:0005365 GO:0015758 GO:0015757 GO:0015793 GO:0032440 GO:0015591 GO:0015575 GO:0015798 GO:0005351 GO:0015795 GO:0090406 GO:0015752 GO:0005886																																														
comp58704_c0_seq2 GO:0008601 GO:0005829 GO:0006470 GO:0000166 GO:0007165 GO:0000159																																																																	
comp58705_c0_seq61 GO:0046872 GO:0005975 GO:0019243 GO:0009409 GO:0031977 GO:0010319 GO:0009570 GO:0005739 GO:0004462																																																														
comp58706_c0_seq4 GO:0044238 GO:0044260 GO:0005515 GO:0065007 GO:0016020 GO:0006950																																																																	
comp58707_c0_seq2 GO:0048364 GO:0009735 GO:0032259 GO:0005768 GO:0010289 GO:0005802 GO:0048367 GO:0008168 GO:0005794																																																														
comp58708_c0_seq4 GO:0050660 GO:0015036 GO:0005777 GO:0008137 GO:0031314 GO:0005509 GO:0055114																																																																
comp58709_c0_seq2 GO:0015416 GO:0006200 GO:0005524 GO:0016020																																																																			
comp58711_c0_seq1 GO:0043622 GO:0009664 GO:0008283 GO:0009524 GO:0046983 GO:0005829 GO:0008017 GO:0005819 GO:0007020 GO:0005982 GO:0030244 GO:0048193 GO:0051322 GO:0051302 GO:0001578 GO:0019344 GO:0000272 GO:0048528 GO:0009574 GO:0031116 GO:0005634 GO:0010005 GO:0000910																																																
comp58712_c1_seq20 GO:0032862 GO:0070382 GO:0009827 GO:0035024 GO:0005543 GO:0005100 GO:0009846 GO:0030139 GO:0017048 GO:0090406 GO:0045177 GO:0009860 GO:0005938 GO:0009865																																																									
comp58713_c0_seq8 GO:0030301 GO:0008158 GO:0009506 GO:0005886 GO:0005774 GO:0016021 GO:0009507 GO:0005739																																																															
comp58714_c0_seq8 GO:0004707 GO:0006468 GO:0010075 GO:0005524 GO:0005515 GO:0009664 GO:0009832 GO:0005634 GO:0000165																																																														
comp58715_c0_seq1 GO:0009825 GO:0009729 GO:0009507 GO:0046827 GO:0005829 GO:0046777 GO:0042538 GO:0009965 GO:0004674 GO:0009742 GO:0005886 GO:0005524 GO:0050321 GO:0009733																																																									
comp58715_c1_seq3 GO:0005829 GO:0055114 GO:0009328 GO:0006432 GO:0016705 GO:0009055 GO:0004497 GO:0005524 GO:0004826 GO:0000287 GO:0020037 GO:0000049 GO:0005506																																																										
comp58716_c0_seq1 GO:0010155 GO:0045036 GO:0006862 GO:0006944 GO:0010363 GO:0015802 GO:0005525 GO:0006612 GO:0043069 GO:0005829 GO:0009707 GO:0043090 GO:0015696 GO:0006820 GO:0006888 GO:0009506 GO:0042803 GO:0005783 GO:0003924 GO:0005886																																																			
comp58717_c0_seq2 GO:0006468 GO:0004674 GO:0016491 GO:0005524 GO:0050794 GO:0005886																																																																	
comp58718_c3_seq1 GO:0003700 GO:0043565 GO:0005634 GO:0006355																																																																			
comp58719_c0_seq2 GO:0031348 GO:0009611 GO:0009605 GO:0005515 GO:0010119 GO:0009867 GO:0006862 GO:0009862 GO:0004683 GO:0009414 GO:0006944 GO:0010363 GO:0015802 GO:0006612 GO:0005509 GO:0050832 GO:0048767 GO:0043069 GO:0005829 GO:0046777 GO:0043090 GO:0042538 GO:0015696 GO:0010359 GO:0000165 GO:0006888 GO:0009409 GO:0009738 GO:0005886 GO:0030968 GO:0005634 GO:0005524 GO:0009723 GO:0009733																																					
comp58719_c1_seq4 GO:0003676																																																																						
comp58720_c0_seq4 GO:0044464 GO:0008270																																																																					
comp58721_c0_seq5 GO:0042335 GO:0006473 GO:0006355 GO:0043565 GO:0043481 GO:0003700 GO:0048765 GO:0050692 GO:0005634																																																														
comp58721_c1_seq1 GO:0016021 GO:0005794 GO:0005739																																																																				
comp58723_c0_seq7 GO:0010363 GO:0015802 GO:0005739 GO:0015696 GO:0043090 GO:0006820 GO:0016884 GO:0006626 GO:0006862 GO:0004040 GO:0006612 GO:0006944 GO:0043069 GO:0006888 GO:0043269																																																								
comp58724_c0_seq2 GO:0006412 GO:0005739 GO:0006354 GO:0003735 GO:0009220 GO:0015934 GO:0042254																																																																
comp58724_c1_seq4 GO:0019901 GO:0009651 GO:0051607 GO:0048573 GO:0043531 GO:0010440 GO:0000079 GO:0006396 GO:0016538 GO:0009626 GO:0009506 GO:0045893 GO:0043687 GO:0005886 GO:0005634																																																								
comp58725_c1_seq3 GO:0006979 GO:0009753 GO:0009446 GO:0048316 GO:0008295 GO:0006527 GO:0009651 GO:0009409 GO:0009611 GO:0008792 GO:0009737 GO:0080167																																																											
comp58726_c0_seq5 GO:0009414 GO:0009651 GO:0050826 GO:0045893 GO:0005634																																																																		
comp58728_c0_seq1 GO:0006400 GO:0036265 GO:0008176 GO:0005634 GO:0005739																																																																		
comp58728_c1_seq1 GO:0044707 GO:0009628																																																																					
comp58729_c2_seq23 GO:0009908 GO:0006094 GO:0009816 GO:0009651 GO:0052544 GO:0009753 GO:0050832 GO:0009700 GO:0006096 GO:0030244 GO:0009570 GO:0019761 GO:0002213 GO:0046686 GO:0019344 GO:0009408 GO:0010193 GO:0006750 GO:0005524 GO:0004357																																																			
comp58730_c0_seq2 GO:0010025 GO:0010029 GO:0006511 GO:0050994 GO:0006723 GO:0004842 GO:0009737																																																																
comp58731_c0_seq1 GO:0005829 GO:0004832 GO:0002161 GO:0006438 GO:0005739 GO:0006450 GO:0005524 GO:0009507 GO:0009793																																																														
comp58732_c0_seq2 GO:0009089 GO:0043085 GO:0019252 GO:0016597 GO:0050661 GO:0000023 GO:0016310 GO:0009086 GO:0004072 GO:0009570 GO:0009088 GO:0019761 GO:0006164 GO:0055114 GO:0004412 GO:0005524																																																							
comp58734_c0_seq4 GO:0005739 GO:0046872 GO:0045995 GO:0006426 GO:0009658 GO:0048481 GO:0005524 GO:0008081 GO:0009570 GO:0009793 GO:0004820																																																												
comp58738_c1_seq3 GO:0016020 GO:0043231 GO:0044272 GO:0020037 GO:0009617 GO:0009055 GO:0005506 GO:0016709 GO:0042435 GO:0055114 GO:0044550 GO:0006952 GO:0044444																																																										
comp58739_c1_seq4 GO:0046872 GO:0055114 GO:0016702																																																																				
comp58740_c0_seq3 GO:0009788 GO:0005829 GO:0008270 GO:0004842 GO:0016567 GO:0005515 GO:0005634 GO:0006865																																																															
comp58741_c0_seq16 GO:0005488																																																																						
comp58742_c0_seq12 GO:0008270																																																																						
comp58743_c0_seq1 GO:0016758 GO:0008152																																																																					
comp58744_c0_seq7 GO:0005739 GO:0004827 GO:0016226 GO:0010109 GO:0009553 GO:0010027 GO:0010228 GO:0009658 GO:0048481 GO:0005524 GO:0009570 GO:0006433 GO:0009793																																																										
comp58745_c0_seq2 GO:0004842 GO:0000151 GO:0016567																																																																				
comp58746_c0_seq34 GO:0005488 GO:0009725 GO:0009416 GO:0009791 GO:0050794 GO:0048608																																																																	
comp58747_c1_seq14 GO:0008152 GO:0007165 GO:0003824 GO:0005886																																																																			
comp58749_c1_seq2 GO:0000911 GO:0043231 GO:0051322 GO:0009909 GO:0051567 GO:0000226 GO:0006346 GO:0042127 GO:0031048																																																														
comp58750_c0_seq6 GO:0044238 GO:0044260																																																																					
comp58751_c0_seq4 GO:0000911 GO:0006468 GO:0004674 GO:0005730 GO:0000226 GO:0005524 GO:0005515 GO:0005737																																																															
comp58752_c0_seq3 GO:0051457 GO:0009536 GO:0043565 GO:0008356 GO:0009956 GO:0009630 GO:0006351 GO:0042803 GO:0005634																																																														
comp58753_c1_seq1 GO:0005789 GO:0006979 GO:0009698 GO:0003958 GO:0005506 GO:0010181 GO:0009737 GO:0055114																																																															
comp58754_c0_seq10 GO:0005829 GO:0008565 GO:0019898 GO:0009306 GO:0000910 GO:0006623 GO:0010200 GO:0006944 GO:0005515 GO:0030968 GO:0048193 GO:0005773 GO:0006904 GO:0005886																																																									
comp58755_c0_seq38 GO:0043484 GO:0003723 GO:0006417 GO:0000932 GO:0016491 GO:0000166 GO:0009846 GO:0005634																																																															
comp58756_c0_seq1 GO:0045492 GO:0010413 GO:0005739																																																																				
comp58757_c1_seq11 GO:0005634 GO:0005829																																																																					
comp58758_c0_seq1 GO:0009813 GO:0009526 GO:0015851 GO:0015931 GO:0009507 GO:0016020 GO:0015205 GO:0009411 GO:0043100																																																														
comp58759_c1_seq5 GO:0006468 GO:0004674 GO:0000166																																																																				
comp58760_c0_seq3 GO:0048657 GO:0003677 GO:0009555 GO:0008152																																																																			
comp58762_c0_seq1 GO:0009753 GO:0004842 GO:0016567 GO:0009755 GO:0005515 GO:0010150 GO:0005737 GO:0042542																																																															
comp58764_c0_seq3 GO:0006468 GO:0004674 GO:0016021 GO:0010075 GO:0007169 GO:0005524 GO:0005886																																																																
comp58765_c0_seq3 GO:0005886 GO:0009987 GO:0005829																																																																				
comp58766_c0_seq4 GO:0042742 GO:0006094 GO:0007010 GO:0010498 GO:0009507 GO:0016020 GO:0005634 GO:0005829																																																															
comp58767_c0_seq14 GO:0016020 GO:0016023 GO:0005794																																																																				
comp58768_c0_seq1 GO:0005488 GO:0005829 GO:0006355																																																																				
comp58769_c0_seq3 GO:0009543																																																																						
comp58770_c0_seq8 GO:0005737 GO:0009414 GO:0009409 GO:0010118 GO:0005886 GO:0042539 GO:0005509 GO:0010107 GO:0030007 GO:0005513																																																													
comp58771_c0_seq3 GO:0018342 GO:0008318 GO:0046686 GO:0005829																																																																			
comp58772_c0_seq23 GO:0050896 GO:0008270																																																																					
comp58772_c1_seq4 GO:0031047 GO:0010078 GO:0016569 GO:0009855 GO:0006342 GO:0010051 GO:0009965 GO:0010014 GO:0010479 GO:0045893 GO:0042803 GO:0048439 GO:0005634																																																										
comp58772_c2_seq5 GO:0016020 GO:0008270 GO:0009536																																																																				
comp58772_c3_seq1 GO:0005743 GO:0055085 GO:0006839 GO:0016021 GO:0005215																																																																		
comp58773_c1_seq2 GO:0009507 GO:0005634 GO:0000166 GO:0006487																																																																			
comp58774_c0_seq10 GO:0005737																																																																						
comp58775_c0_seq13 GO:0005737																																																																						
comp58776_c0_seq5 GO:0051287 GO:0006633 GO:0055114 GO:0010498 GO:0008270 GO:0016652 GO:0050897 GO:0007010 GO:0006108 GO:0004473 GO:0006094 GO:0051289 GO:0042803 GO:0009507 GO:0016619																																																								
comp58777_c0_seq22 GO:0005794 GO:0050508 GO:0045492 GO:0010413 GO:0016020																																																																		
comp58779_c0_seq2 GO:0009536																																																																						
comp58782_c1_seq2 GO:0052716 GO:0005507 GO:0008447 GO:0048046 GO:0046274 GO:0055114																																																																	
comp58783_c0_seq2 GO:0043231 GO:0051276 GO:0006259 GO:0022402 GO:0050794 GO:0044444																																																																	
comp58784_c0_seq6 GO:0009524 GO:0051322 GO:0000226 GO:0005819 GO:0005874																																																																		
comp58785_c0_seq3 GO:0003700 GO:0003677 GO:0005634 GO:0006355																																																																			
comp58786_c0_seq2 GO:0016020 GO:0005829 GO:0003676 GO:0016607 GO:0000166																																																																		
comp58787_c0_seq5 GO:0010075 GO:0016757 GO:0009506 GO:0005618 GO:0005634 GO:0005783 GO:0005739																																																																
comp58788_c0_seq1 GO:0005773																																																																						
comp58788_c2_seq6 GO:0008568 GO:0005524																																																																					
comp58790_c0_seq3 GO:0019684 GO:0006098 GO:0010218 GO:0009941 GO:0019252 GO:0010114 GO:0009902 GO:0008878 GO:0009501 GO:0009570 GO:0009637 GO:0005978 GO:0005524 GO:0006364 GO:0010027																																																								
comp58791_c0_seq4 GO:0006071 GO:0009610 GO:0019375 GO:0005524 GO:0042631 GO:0004371 GO:0016310 GO:0005737 GO:0016036																																																														
comp58792_c0_seq4 GO:0043161 GO:0007276 GO:0051510 GO:0051302 GO:0043248 GO:0051788 GO:0032875 GO:0005634																																																															
comp58793_c0_seq21 GO:0006468 GO:0004674 GO:0009506 GO:0000041 GO:0005524 GO:0050794 GO:0005886																																																																
comp58794_c0_seq3 GO:0006499 GO:0009880 GO:0009941 GO:0009867 GO:0048825 GO:0009524 GO:0051301 GO:0005829 GO:0010564 GO:0006511 GO:0043090 GO:0005819 GO:0006396 GO:0031461 GO:0010265 GO:0031625 GO:0006486 GO:0045595 GO:0006888 GO:0000794 GO:0048366 GO:0007062 GO:0042752 GO:0009733 GO:0010072 GO:0010162																																													
comp58795_c0_seq6 GO:0046855 GO:0004519 GO:0010305 GO:0052659 GO:0009737 GO:0052658 GO:0046854 GO:0004445 GO:0004527 GO:0010588 GO:0005737 GO:0010067 GO:0032957																																																										
comp58796_c0_seq1 GO:0003964 GO:0006278 GO:0003723																																																																				
comp58796_c1_seq1 GO:0003676 GO:0005634 GO:0015074																																																																				
comp58797_c0_seq3 GO:0005829 GO:0017137 GO:0005968 GO:0004663 GO:0006886 GO:2000541 GO:0005093																																																																
comp58798_c1_seq7 GO:0003779 GO:0030036																																																																					
comp58800_c0_seq1 GO:0005768 GO:0005525 GO:0005886 GO:0016787 GO:0007264 GO:0015031																																																																	
comp58802_c0_seq1 GO:0008270 GO:0003727 GO:0051276 GO:0035196 GO:0000398 GO:0043687 GO:0009410 GO:0030422 GO:0008284 GO:0045893 GO:0005634																																																												
comp58803_c1_seq2 GO:0042802 GO:0071472 GO:0005634 GO:0005829 GO:0031396																																																																		
comp58804_c0_seq10 GO:0032259 GO:0009536 GO:0008168																																																																				
comp58805_c1_seq2 GO:0005739 GO:0046872 GO:0016874 GO:0004638 GO:0005524 GO:0009555 GO:0009570 GO:0034023 GO:0006189																																																														
comp58806_c0_seq39 GO:0005739 GO:0005886																																																																					
comp58808_c0_seq17 GO:0006284 GO:0004519 GO:0003677 GO:0042644 GO:0019104 GO:0051539 GO:0005634 GO:0003906 GO:0005739																																																														
comp58809_c0_seq1 GO:0005802 GO:0005794 GO:0005768 GO:0032259 GO:0008168																																																																		
comp58810_c0_seq5 GO:0006979 GO:0006631 GO:0015994 GO:0010264 GO:0010189 GO:0009266 GO:0009976 GO:0009915 GO:0009706 GO:0009534 GO:0010287 GO:0031347 GO:0016122 GO:0009644																																																									
comp58810_c1_seq1 GO:0043229 GO:0003723 GO:0048316 GO:0022402 GO:0009553 GO:0009909 GO:0007059 GO:0010427 GO:0000166 GO:0031048 GO:0009790																																																												
comp58811_c1_seq10 GO:0007018 GO:0005886 GO:0005524 GO:0005634 GO:0005739 GO:0003777 GO:0005874																																																																
comp58813_c0_seq9 GO:0019279 GO:0004123 GO:0080146 GO:0004121 GO:0009570 GO:0044540 GO:0000394 GO:0030170																																																															
comp58814_c0_seq2 GO:0016772																																																																						
comp58814_c1_seq1 GO:0004672																																																																						
comp58815_c0_seq3 GO:0016023 GO:0005739																																																																					
comp58816_c0_seq2 GO:0070647 GO:0007275																																																																					
comp58817_c0_seq3 GO:0010162 GO:0006420 GO:0005829 GO:0010564 GO:0006164 GO:0005739 GO:0005524 GO:0004814 GO:0048366 GO:0009570 GO:0048825																																																												
comp58818_c1_seq2 GO:0008270 GO:0009651 GO:0010286 GO:0009733 GO:0010200 GO:0006499 GO:0009737 GO:0000303 GO:0005737 GO:0006914 GO:0005634 GO:0009873																																																											
comp58819_c0_seq2 GO:0005737 GO:0005856 GO:0048767 GO:0005886 GO:0005618 GO:0005524 GO:0005634																																																																
comp58820_c0_seq2 GO:0009941 GO:0003993 GO:0004252 GO:0005886 GO:0006465 GO:0009642 GO:0016021 GO:0006508 GO:0009535 GO:0005739																																																													
comp58822_c0_seq1 GO:0047911 GO:0005975 GO:0005576 GO:0005773 GO:0004650 GO:0007047																																																																	
comp58823_c0_seq6 GO:0005774 GO:0005739 GO:0006508 GO:0005886 GO:0008236																																																																		
comp58824_c1_seq21 GO:0004721																																																																						
comp58826_c0_seq12 GO:0016491 GO:0005506 GO:0055114 GO:0010181																																																																			
comp58826_c1_seq1 GO:0000085 GO:0005515 GO:0009793 GO:0016579 GO:0003958 GO:0016571 GO:0000724 GO:0010388 GO:0009640 GO:0005737 GO:0016567 GO:0005506 GO:0010212 GO:0055114 GO:0045893 GO:0043687 GO:0005634 GO:0010181																																																					
comp58827_c0_seq3 GO:0016020 GO:0006857 GO:0005215																																																																				
comp58828_c0_seq2 GO:0006351 GO:0004652																																																																					
comp58828_c1_seq3 GO:0016779																																																																						
comp58829_c1_seq1 GO:0016762 GO:0004553 GO:0005618 GO:0006073 GO:0007047 GO:0048046																																																																	
comp58832_c0_seq3 GO:0046872 GO:0008152 GO:0016682																																																																				
comp58833_c0_seq9 GO:0016881																																																																						
comp58834_c0_seq2 GO:0005515 GO:0016052 GO:1901135 GO:0005982 GO:0042646 GO:0003677 GO:0044281 GO:0006139 GO:0009657 GO:0055114 GO:0008654 GO:0009535																																																											
comp58835_c0_seq3 GO:0009846 GO:0009555 GO:0003676 GO:0009506 GO:0009507 GO:0005634 GO:0005829 GO:0048481																																																															
comp58836_c1_seq3 GO:0043231 GO:0005737																																																																					
comp58837_c1_seq2 GO:0009833 GO:0016049 GO:0008270 GO:0016021 GO:0030244 GO:0007047 GO:0016760 GO:0010214 GO:0019761 GO:0005886																																																													
comp58839_c1_seq7 GO:0008152 GO:0005886 GO:0004722																																																																				
comp58840_c0_seq1 GO:0009825 GO:0048767 GO:0008270 GO:0000271 GO:0009932 GO:0009506 GO:0032259 GO:0005768 GO:0005774 GO:0043481 GO:0010817 GO:0005802 GO:0009664 GO:0009832 GO:0008168 GO:0005794 GO:0005634 GO:0005886																																																					
comp58841_c0_seq6 GO:0009705 GO:0005802 GO:0015991 GO:0015078 GO:0009507 GO:0012510 GO:0000220 GO:0031669 GO:0009678 GO:0005768 GO:0016887 GO:0005886 GO:0005739																																																										
comp58843_c0_seq31 GO:0048193 GO:0016020 GO:0005634																																																																				
comp58843_c1_seq2 GO:0009560																																																																						
comp58844_c0_seq16 GO:0005515 GO:0007165 GO:0005634																																																																				
comp58844_c2_seq1 GO:0016630 GO:0055114 GO:0000166																																																																				
comp58844_c3_seq1 GO:0016023 GO:0004045 GO:0005739 GO:0009536																																																																			
comp58845_c2_seq7 GO:0015238 GO:0031348 GO:0005739 GO:0006855 GO:0009941 GO:0009624 GO:0015297 GO:0005886 GO:0009697																																																														
comp58846_c3_seq1 GO:0005618 GO:0009753 GO:0008843 GO:0005488 GO:0044238 GO:0006032 GO:0009651 GO:0035885 GO:0009737 GO:0016301																																																													
comp58847_c1_seq1 GO:0004439 GO:0046855 GO:0005634 GO:0032957																																																																			
comp58848_c1_seq2 GO:0010363 GO:0009862 GO:0031348 GO:0009867 GO:0009409 GO:0009536 GO:0035091 GO:0010200 GO:0006612 GO:0008142 GO:0043069 GO:0030968 GO:0009738 GO:0008202 GO:0009723 GO:0050832 GO:0005634 GO:0009605 GO:0000165																																																				
comp58850_c0_seq6 GO:0009044 GO:0046556 GO:0005618 GO:0005578 GO:0031222 GO:0048046 GO:0008422 GO:0045493																																																															
comp58851_c0_seq12 GO:0000226 GO:0000911																																																																					
comp58852_c0_seq4 GO:0009987 GO:0050896 GO:0016772 GO:0044699 GO:0071944 GO:0016020																																																																	
comp58853_c0_seq1 GO:0009624 GO:0005794 GO:0009705 GO:0005886 GO:0055085 GO:0005351 GO:0008643 GO:0032440 GO:0016021 GO:0005337 GO:0055114																																																												
comp58854_c0_seq4 GO:0005829 GO:0010048 GO:0008270 GO:0003676 GO:0031365 GO:0048440 GO:0004177 GO:0006508 GO:0043481 GO:0008235 GO:0016485																																																												
comp58855_c1_seq15 GO:0004871 GO:0005095 GO:0009749 GO:0042127 GO:0042388 GO:0051020 GO:0005834 GO:0005525 GO:0005789 GO:0006184 GO:0006571 GO:0046872 GO:0009094 GO:0016247 GO:0009845 GO:0010244 GO:0008219 GO:0072593 GO:0003924 GO:0006952 GO:0001789 GO:0009789 GO:0010027 GO:0006471																																															
comp58856_c1_seq11 GO:0019216 GO:0050518 GO:0009108 GO:0006733 GO:0009416 GO:0044272 GO:0009117 GO:0019288 GO:0006766 GO:0019748 GO:0015995 GO:0009695 GO:0016117 GO:0000096 GO:0006546 GO:0008652 GO:0016023 GO:0006636 GO:0009570 GO:0009072 GO:0009106																																																		
comp58859_c0_seq17 GO:0009630 GO:0009960 GO:0009880 GO:0009639 GO:0010431 GO:0045492 GO:0007155 GO:0000911 GO:0045010 GO:0009911 GO:0005829 GO:0019005 GO:0006511 GO:0010090 GO:0008284 GO:0004842 GO:0031625 GO:0048765 GO:0010228 GO:0045595 GO:0010413 GO:0007062 GO:0005634 GO:0010072 GO:0071555																																														
comp58861_c0_seq3 GO:0003979 GO:0005829 GO:0051287 GO:0005618 GO:0055114 GO:0042732 GO:0052546 GO:0006065 GO:0005634																																																														
comp58862_c0_seq3 GO:0005622 GO:0008270																																																																					
comp58863_c0_seq1 GO:0008270 GO:0016458 GO:0006355 GO:0040029 GO:0003677 GO:0004386 GO:0009630																																																																
comp58865_c0_seq2 GO:0005829 GO:0006623 GO:0009651 GO:0030145 GO:0004177 GO:0009266 GO:0006508 GO:0006972 GO:0006833 GO:0007030 GO:0008235 GO:0010150 GO:0006096 GO:0009570 GO:0006094 GO:0005773 GO:0046686																																																						
comp58866_c0_seq2 GO:0007018 GO:0005886 GO:0005524 GO:0005634 GO:0007020 GO:0003777 GO:0005874																																																																
comp58867_c0_seq102 GO:0010363 GO:0009867 GO:0006612 GO:0009863 GO:0009507																																																																		
comp58867_c1_seq2 GO:0009506 GO:0016020																																																																					
comp58868_c0_seq1 GO:0006154 GO:0047622 GO:0009753 GO:0009611 GO:0005618 GO:0006148 GO:0047724 GO:0048046 GO:0005739																																																														
comp58869_c0_seq2 GO:0043169 GO:0009409 GO:0000024 GO:0016161 GO:0005983 GO:0009570																																																																	
comp58870_c0_seq3 GO:0048513 GO:0006869 GO:0004842 GO:0005634																																																																			
comp58871_c0_seq5 GO:0005737 GO:0008033 GO:0016772																																																																				
comp58872_c0_seq1 GO:0003677 GO:0005634 GO:0006355 GO:0006396																																																																			
comp58873_c2_seq2 GO:0048731 GO:0006355 GO:0003677 GO:0016491 GO:0003700 GO:0005634																																																																	
comp58875_c0_seq2 GO:0009744 GO:0010317 GO:0016310 GO:0003872 GO:0005945 GO:0047334 GO:0005524 GO:0006096 GO:0009749 GO:0009750 GO:0015979																																																												
comp58876_c4_seq34 GO:0005488																																																																						
comp58877_c1_seq2 GO:0008017 GO:0006396 GO:0022402 GO:0000226 GO:0010031 GO:0010005 GO:0009826 GO:0007275																																																															
comp58878_c0_seq2 GO:0005886 GO:0055085 GO:0005351 GO:0008643 GO:0032440 GO:0016021 GO:0055114																																																																
comp58879_c0_seq1 GO:0009684 GO:0004604 GO:0000103 GO:0009973 GO:0045454 GO:0009534 GO:0009570 GO:0033741 GO:0019419 GO:0019761 GO:0019344																																																												
comp58879_c1_seq2 GO:0042545 GO:0003735 GO:0009664 GO:0005618 GO:0022627 GO:0016020 GO:0006412																																																																
comp58879_c2_seq1 GO:0004028 GO:0009414 GO:0009941 GO:0004030 GO:0004029 GO:0009737 GO:0006081 GO:0033721 GO:0005739 GO:0055114																																																													
comp58879_c3_seq15 GO:0016020 GO:0005618 GO:0009507 GO:0022627																																																																			
comp58880_c0_seq1 GO:0006904 GO:0000145 GO:0005829 GO:0005739																																																																			
comp58881_c0_seq6 GO:0006468 GO:0009506 GO:0009627 GO:0004713 GO:0005524 GO:0031347 GO:0009742 GO:0005886																																																															
comp58882_c0_seq2 GO:0016301 GO:0010264 GO:0016310 GO:0005634																																																																			
comp58882_c1_seq1 GO:0005634																																																																						
comp58883_c0_seq2 GO:0005884 GO:0048046 GO:0003779 GO:0005634																																																																			
comp58884_c0_seq2 GO:0003677 GO:0005634 GO:0006355																																																																				
comp58885_c1_seq9 GO:0005768 GO:0005794 GO:0005886 GO:0055085 GO:0006812 GO:0016021 GO:0008511 GO:0005802																																																															
comp58886_c0_seq3 GO:0015786 GO:0016021 GO:0005460 GO:0005459 GO:0015785 GO:0080147 GO:0048527 GO:0008643 GO:0005794 GO:0005886																																																													
comp58887_c0_seq1 GO:0008152 GO:0050403																																																																					
comp58888_c0_seq1 GO:0005774 GO:0051788 GO:0006098 GO:0009853 GO:0008270 GO:0005758 GO:0005759 GO:0009651 GO:0080129 GO:0009507 GO:0005618 GO:0005730 GO:0006511 GO:0005741 GO:0004222 GO:0046686 GO:0005750 GO:0005886																																																					
comp58891_c0_seq16 GO:0005886 GO:0004672 GO:0006468 GO:0005524 GO:0006914																																																																		
comp58892_c0_seq1 GO:0043565 GO:0005634																																																																					
comp58892_c1_seq1 GO:0005840 GO:0003735 GO:0042254 GO:0009507 GO:0006412 GO:0005739																																																																	
comp58892_c2_seq3 GO:0005794 GO:0005515 GO:0022402 GO:0006396																																																																			
comp58893_c0_seq1 GO:0009505 GO:0042545 GO:0009409 GO:0030599 GO:0015824 GO:0005576 GO:0045330 GO:0004857 GO:0009741 GO:0043086 GO:0016126																																																												
comp58893_c1_seq8 GO:0008270 GO:0016558 GO:0048573 GO:0006635 GO:0005634																																																																		
comp58894_c0_seq23 GO:0035194 GO:0043231 GO:0006396																																																																				
comp58895_c1_seq2 GO:0006944 GO:0005886 GO:0006897																																																																				
comp58896_c0_seq1 GO:0016020 GO:0008375 GO:0007623 GO:0005739																																																																			
comp58897_c0_seq1 GO:0003887 GO:0006351 GO:0003677 GO:0009165 GO:0005829																																																																		
comp58898_c0_seq4 GO:0048519 GO:0009850 GO:0006355 GO:0009616 GO:0010050 GO:0009887 GO:0010051 GO:0003677 GO:0009733 GO:0010158 GO:0003700 GO:0048439 GO:0009855 GO:0048438 GO:0005634																																																								
comp58900_c0_seq6 GO:0010182 GO:0016571 GO:0042803 GO:0048825 GO:0006406 GO:0009965 GO:0010413 GO:0051301 GO:0016579 GO:0050826 GO:0048505 GO:0000085 GO:0006396 GO:0010074 GO:0016049 GO:0010072 GO:0009880 GO:0045492 GO:0010388 GO:0048449 GO:0009845 GO:0010090 GO:0010389 GO:0050665 GO:0010162 GO:0004842 GO:0019915 GO:0007062 GO:0010390 GO:0008270 GO:0005739 GO:0009817 GO:0045010 GO:0010228 GO:0000956 GO:0009640 GO:0016926 GO:0009909 GO:0007155 GO:0045893 GO:0048589 GO:0003002 GO:0005634 GO:0033523																											
comp58901_c0_seq13 GO:0046872 GO:0005739 GO:0009507 GO:0008253																																																																			
comp58902_c1_seq11 GO:0005524 GO:0000186 GO:0004709 GO:0005634 GO:0005886 GO:0000165																																																																	
comp58903_c2_seq1 GO:0005840 GO:0043231 GO:0016020 GO:0044446																																																																			
comp58905_c0_seq1 GO:0004672 GO:0006468 GO:0005524 GO:0016020 GO:0005829																																																																		
comp58905_c2_seq4 GO:0009639 GO:0005634 GO:0006301																																																																				
comp58906_c0_seq8 GO:0051219 GO:0009507 GO:0022402 GO:0005874																																																																			
comp58908_c1_seq2 GO:0005802 GO:0016051 GO:0047262 GO:0005794 GO:0005768 GO:0005739																																																																	
comp58910_c1_seq3 GO:0004843 GO:0006511 GO:0004221 GO:0005634																																																																			
comp58911_c0_seq1 GO:0009987 GO:0008152																																																																					
comp58912_c0_seq2 GO:0010042 GO:0030176 GO:0030026 GO:0006816 GO:0046872 GO:0006754 GO:0046686 GO:0005388 GO:0005886 GO:0005524 GO:0006828																																																												
comp58912_c1_seq2 GO:0046872 GO:0016020 GO:0005388 GO:0000166																																																																			
comp58913_c0_seq1 GO:0097159 GO:0043231 GO:1901363																																																																				
comp58914_c0_seq7 GO:0016023 GO:0006397 GO:0005634																																																																				
comp58915_c0_seq3 GO:0005524 GO:0000186 GO:0004709 GO:0005886 GO:0000165																																																																		
comp58916_c0_seq6 GO:0004553 GO:0005975 GO:0005794 GO:0005739 GO:0005634																																																																		
comp58917_c0_seq1 GO:0006810 GO:0005471 GO:0031969 GO:0005524 GO:0016021																																																																		
comp58918_c0_seq3 GO:0048193 GO:0042732 GO:0005794 GO:0030244 GO:0005829 GO:0009536																																																																	
comp58919_c0_seq1 GO:0007010 GO:0006399 GO:0006094 GO:0006261 GO:0009793 GO:0005971 GO:0009902 GO:0010498 GO:0009507 GO:0004748 GO:0009202 GO:0046686 GO:0003723 GO:0055114 GO:0009165 GO:0005524 GO:0006364 GO:0000175 GO:0010027 GO:0005739																																																			
comp58920_c0_seq5 GO:0006457 GO:0051082 GO:0005634 GO:0003677 GO:0031072																																																																		
comp58921_c0_seq2 GO:0043231 GO:0044444																																																																					
comp58922_c0_seq9 GO:0046872																																																																						
comp58923_c0_seq2 GO:0004553 GO:0005975 GO:0043169																																																																				
comp58923_c1_seq8 GO:0009737 GO:0005576 GO:0005509 GO:0009507 GO:0009819																																																																		
comp58924_c0_seq1 GO:0005768 GO:0006891 GO:0030244 GO:0030173 GO:0005802																																																																		
comp58925_c0_seq55 GO:0015824 GO:0016021 GO:0005275 GO:0015171 GO:0005886																																																																		
comp58926_c2_seq3 GO:0003677 GO:0044424 GO:0080167																																																																				
comp58927_c0_seq5 GO:0055085 GO:0006598 GO:0015706 GO:0005739 GO:0016021 GO:0009698 GO:0042398 GO:0006873 GO:0010167 GO:0005215 GO:0005886																																																												
comp58928_c0_seq1 GO:0005978 GO:0009501 GO:0010170 GO:0005524 GO:0019252 GO:0009507 GO:0008878 GO:0005829																																																															
comp58929_c0_seq24 GO:0000085 GO:0050826 GO:0009414 GO:0010252 GO:0009793 GO:0000166 GO:0016579 GO:0009734 GO:0009062 GO:0016571 GO:0010388 GO:0009640 GO:0005777 GO:0005829 GO:0010564 GO:0019915 GO:0008641 GO:0010182 GO:0009965 GO:0009933 GO:0016567 GO:0009845 GO:0010228 GO:0045893 GO:0009909 GO:0005886 GO:0005634 GO:0006281 GO:0010162																																										
comp58930_c0_seq6 GO:0009630 GO:0009611 GO:0009651 GO:0004672 GO:0045727 GO:0006972 GO:0005737 GO:0005819 GO:0006468 GO:0006486 GO:0005634 GO:0005524																																																											
comp58931_c1_seq4 GO:0044424																																																																						
comp58932_c0_seq1 GO:0006468 GO:0004674 GO:0009611 GO:0007169 GO:0016491 GO:0016023 GO:0005524 GO:0001653 GO:0009507 GO:0016787 GO:0005886																																																												
comp58933_c0_seq1 GO:0005886 GO:0006468 GO:0005524 GO:0005634 GO:0004674																																																																		
comp58934_c0_seq11 GO:0009789 GO:0006301 GO:0009086 GO:0006511 GO:0043231 GO:0009414 GO:0009651 GO:0046872 GO:0004842 GO:0016567 GO:0000394																																																												
comp58935_c0_seq1 GO:0003676 GO:0005622 GO:0016567 GO:0004842 GO:0016020 GO:0008270																																																																	
comp58935_c1_seq3 GO:0005634																																																																						
comp58936_c0_seq7 GO:0031348 GO:0009595 GO:0006984 GO:0009867 GO:0009697 GO:0006862 GO:0009862 GO:0006944 GO:0010363 GO:0010310 GO:0002679 GO:0071216 GO:0010200 GO:0015802 GO:0009651 GO:0043900 GO:0006612 GO:0050832 GO:0016787 GO:0042742 GO:0043069 GO:0002831 GO:0043090 GO:0010337 GO:0015696 GO:0000165 GO:0034976 GO:0006820 GO:0006888 GO:0052542 GO:0005634 GO:0043269																																							
comp58937_c0_seq7 GO:0048193 GO:0046520 GO:0030244 GO:0016126 GO:0005739 GO:0004578																																																																	
comp58938_c0_seq2 GO:0009560 GO:0031072 GO:0008270 GO:0005739 GO:0051085 GO:0010197 GO:0009408 GO:0000740 GO:0005524 GO:0051082 GO:0009558 GO:0010198																																																											
comp58940_c0_seq5 GO:0005634 GO:0003677																																																																					
comp58941_c0_seq2 GO:0003676																																																																						
comp58942_c1_seq14 GO:0015827 GO:0016021 GO:0015172 GO:0015175 GO:0005886 GO:0015810																																																																	
comp58944_c0_seq4 GO:0008026 GO:0003676 GO:0005524 GO:0005634 GO:0005739																																																																		
comp58945_c0_seq2 GO:0005516																																																																						
comp58946_c0_seq1 GO:0042393 GO:0043972 GO:0007267 GO:0004402 GO:0080188 GO:0043971 GO:0010385 GO:0035196 GO:0009506 GO:0044030 GO:0010267 GO:0005634 GO:0009616 GO:0044154																																																									
comp58948_c0_seq1 GO:0005488 GO:0034645 GO:0010467 GO:0044238																																																																			
comp58949_c0_seq10 GO:0005509 GO:0016746 GO:0006655																																																																				
comp58949_c1_seq1 GO:0030001 GO:0046872																																																																					
comp58950_c0_seq1 GO:0043447 GO:0010025 GO:0042335 GO:0055114 GO:0009414 GO:0016021 GO:0042742 GO:0046185 GO:0043668 GO:0010143 GO:0016491 GO:0071771 GO:0048653 GO:0050832 GO:0005506																																																								
comp58951_c0_seq3 GO:0044444 GO:0043231																																																																					
comp58952_c0_seq4 GO:0004672																																																																						
comp58953_c0_seq4 GO:0044464																																																																						
comp58954_c0_seq5 GO:0050896 GO:0016023 GO:0009987 GO:0016020 GO:0009536																																																																		
comp58955_c0_seq1 GO:0000394 GO:0016117 GO:0043085 GO:0000911 GO:0019252 GO:0010075 GO:0000023 GO:0051225 GO:0009086 GO:0005737 GO:0005874 GO:0003777 GO:0008017 GO:0010228 GO:0030154 GO:0016887 GO:0006200 GO:0007018 GO:0005871 GO:0005634 GO:0005524																																																		
comp58956_c0_seq3 GO:0005829 GO:0016192 GO:0005083 GO:0006886																																																																			
comp58957_c0_seq7 GO:0010363 GO:0008565 GO:0009306 GO:0015802 GO:0006882 GO:0006623 GO:0015696 GO:0043090 GO:0006820 GO:0009705 GO:0006862 GO:0006612 GO:0006944 GO:0043069 GO:0005515 GO:0006816 GO:0005802 GO:0006888 GO:0043269 GO:0006904 GO:0009624 GO:0005794																																																	
comp58958_c0_seq2 GO:0008250 GO:0018279 GO:0005739 GO:0030244 GO:0009506 GO:0006364 GO:0009409 GO:0009505 GO:0005774 GO:0016023 GO:0004579 GO:0005794 GO:0005886																																																										
comp58959_c0_seq2 GO:0009705 GO:0016036 GO:0009853 GO:0009941 GO:0042744 GO:0006635 GO:0048046 GO:0006995 GO:0005515 GO:0010319 GO:0015174 GO:0015326 GO:0022626 GO:0030003 GO:0016558 GO:0020037 GO:0048573 GO:0016021 GO:0005618 GO:0005777 GO:0050897 GO:0004096 GO:0045454 GO:0005982 GO:0009570 GO:0003333 GO:0070838 GO:0006569 GO:0008219 GO:0046686 GO:0009409 GO:0009684 GO:0009506 GO:0031347 GO:0009970 GO:0005886 GO:0005634 GO:0009627 GO:0005739																																
comp58960_c0_seq2 GO:0005576 GO:0015996																																																																					
comp58961_c0_seq2 GO:0005886																																																																						
comp58962_c1_seq19 GO:0005737 GO:0008536																																																																					
comp58963_c0_seq2 GO:0016558 GO:0042623 GO:0005778 GO:0016023 GO:0005524 GO:0006635 GO:0005515 GO:0006950 GO:0005886																																																														
comp58964_c0_seq6 GO:0019745 GO:0005886 GO:0016126 GO:0005739																																																																			
comp58965_c0_seq1 GO:0005829 GO:0008565 GO:0005643 GO:0052546 GO:0009507 GO:0000059 GO:0052541																																																																
comp58966_c0_seq2 GO:0003825 GO:0004805 GO:0005992 GO:0005739																																																																			
comp58967_c0_seq1 GO:0019252 GO:0000023 GO:0009536																																																																				
comp58967_c1_seq1 GO:0009506 GO:0006499 GO:0016192 GO:0006886 GO:0005829 GO:0030131																																																																	
comp58968_c0_seq1 GO:0046835 GO:0005524 GO:0006012 GO:0004335 GO:0005829 GO:0033858																																																																	
comp58969_c0_seq2 GO:0005975 GO:0009505 GO:0046556 GO:0010214 GO:0046685 GO:0048046 GO:0008422																																																																
comp58970_c0_seq16 GO:0016812 GO:0016023 GO:0019556																																																																				
comp58971_c0_seq7 GO:0009639 GO:0005634 GO:0008270																																																																				
comp58972_c0_seq3 GO:0016021 GO:0009506 GO:0005634 GO:0005886																																																																			
comp58973_c3_seq1 GO:0005886 GO:0005524 GO:0006812 GO:0008152 GO:0009651 GO:0015662																																																																	
comp58973_c4_seq1 GO:0016887 GO:0008152																																																																					
comp58973_c6_seq12 GO:0009407 GO:0016020 GO:0016772 GO:0004722 GO:0005737 GO:0005634																																																																	
comp58974_c0_seq20 GO:0008233 GO:0006511 GO:0004221 GO:0005634 GO:0005829 GO:0008270																																																																	
comp58975_c0_seq1 GO:0004672																																																																						
comp58975_c1_seq15 GO:0016310 GO:0004672																																																																					
comp58977_c1_seq2 GO:0008270 GO:0005739 GO:0009536 GO:0006200 GO:0004176 GO:0051301 GO:0004222 GO:0006508 GO:0005524 GO:0008568 GO:0004252 GO:0030163 GO:0016020																																																										
comp58978_c0_seq4 GO:0005739 GO:0009507 GO:0005886																																																																				
comp58979_c0_seq9 GO:0005774 GO:0051788 GO:0009853 GO:0006094 GO:0006346 GO:0048046 GO:0006833 GO:0009793 GO:0000166 GO:0004013 GO:0051049 GO:0009651 GO:0080129 GO:0048767 GO:0005794 GO:0006972 GO:0005829 GO:0006730 GO:0006511 GO:0007030 GO:0016441 GO:0006096 GO:0046686 GO:0009506 GO:0009266 GO:0005886 GO:0005507																																												
comp58981_c1_seq1 GO:0048193 GO:0005794 GO:0016023 GO:0030244 GO:0016020 GO:0006007																																																																	
comp58982_c0_seq11 GO:0016023 GO:0016021 GO:0005794 GO:0005886																																																																			
comp58983_c0_seq3 GO:0006468 GO:0004674 GO:0005524 GO:0005886																																																																			
comp58984_c0_seq6 GO:0004672 GO:0000166 GO:0016310 GO:0006995 GO:0005886																																																																		
comp58985_c0_seq1 GO:0015450 GO:0031359 GO:0048598 GO:0009658 GO:0005774 GO:0048481 GO:0010006 GO:0045037 GO:0005886																																																														
comp58986_c0_seq32 GO:0006655 GO:0007638 GO:0070509 GO:0007020 GO:0019344 GO:0048528 GO:0007231 GO:0005887 GO:0033500																																																														
comp58988_c2_seq8 GO:0031348 GO:0009862 GO:0005886 GO:0009625 GO:0009507																																																																		
comp58989_c0_seq14 GO:0008935 GO:0009234 GO:0005777 GO:0005739																																																																			
comp58991_c1_seq35 GO:0009611 GO:0009867 GO:0004715 GO:0009414 GO:0000186 GO:0010363 GO:0010200 GO:0004712 GO:0006612 GO:0005829 GO:0042538 GO:0000165 GO:0009966 GO:0009695 GO:0004709 GO:0009738 GO:0009863 GO:0005886 GO:0005634 GO:0005524 GO:0009723 GO:0009733																																																	
comp58992_c0_seq4 GO:0003743 GO:0006413 GO:0005829 GO:0005730 GO:0008026 GO:0009505 GO:0005774 GO:0005524 GO:0046686 GO:0005886																																																													
comp58993_c0_seq5 GO:0005886 GO:0010286																																																																					
comp58993_c1_seq4 GO:0009880 GO:0050826 GO:0005515 GO:0006406 GO:0016570 GO:0080008 GO:0048825 GO:0051301 GO:0048449 GO:0030422 GO:0009640 GO:0031124 GO:0010564 GO:0019915 GO:0010182 GO:0001700 GO:0016567 GO:0009845 GO:0010074 GO:0010228 GO:0035196 GO:0048366 GO:0045893 GO:0006470 GO:0009909 GO:0043687 GO:0007062 GO:0000398 GO:0005634 GO:0016746 GO:0010072 GO:0010162																																							
comp58994_c2_seq16 GO:0009651 GO:0016021 GO:0016023 GO:0048366 GO:0046527 GO:0005783 GO:0006487																																																																
comp58995_c0_seq10 GO:0005516 GO:0005739 GO:0005886																																																																				
comp58996_c0_seq1 GO:0005634																																																																						
comp58996_c1_seq1 GO:0005886																																																																						
comp58996_c2_seq6 GO:0022626 GO:0008240 GO:0004252 GO:0005886 GO:0005774 GO:0009507 GO:0006508 GO:0009630 GO:0005739																																																														
comp58997_c0_seq2 GO:0003677																																																																						
comp58998_c0_seq5 GO:0051510 GO:0006468 GO:0004674 GO:0009506 GO:0005524 GO:0004715 GO:0005886																																																																
comp58999_c1_seq7 GO:0005634 GO:0008270																																																																					
comp59000_c0_seq7 GO:0046872 GO:0005750 GO:0008121 GO:0051537 GO:0016021 GO:0022900																																																																	
comp59001_c0_seq5 GO:0006979 GO:0055114 GO:0048364 GO:0009269 GO:0042538 GO:0005524 GO:0004350 GO:0009737 GO:0055129 GO:0016310 GO:0003842 GO:0004349 GO:0009507 GO:0016020 GO:0009793																																																								
comp59002_c0_seq4 GO:0009524 GO:0050660 GO:0019243 GO:0006808 GO:0009507 GO:0016556 GO:0005634 GO:0017150 GO:0008033 GO:0055114																																																													
comp59004_c0_seq2 GO:0005737																																																																						
comp59005_c0_seq23 GO:0004672 GO:0016310 GO:0009826 GO:0048527 GO:0005886 GO:0005488																																																																	
comp59005_c2_seq1 GO:0015680 GO:0055114 GO:0008270 GO:0004784 GO:0009570 GO:0016532 GO:0019430 GO:0006878																																																															
comp59006_c0_seq3 GO:0010090 GO:0071555 GO:0007155 GO:0048765 GO:0045010 GO:0005737 GO:0005886																																																																
comp59008_c0_seq35 GO:0016023 GO:0005739 GO:0005509 GO:0009536																																																																			
comp59009_c0_seq2 GO:0018106 GO:0023014 GO:0006355 GO:0005789 GO:0004674 GO:0000155 GO:0000156 GO:0051740 GO:0009738 GO:0010105 GO:0030968 GO:0005524 GO:0035556																																																										
comp59010_c0_seq3 GO:0000186 GO:0048268 GO:0004712 GO:0004713 GO:0032440 GO:0046777 GO:0030276 GO:0005545 GO:0000165 GO:0009966 GO:0004709 GO:0055114 GO:0030118 GO:0005886 GO:0005524																																																								
comp59011_c0_seq9 GO:0006863 GO:0005886																																																																					
comp59012_c0_seq9 GO:0010106 GO:0009793 GO:0005634 GO:0008270																																																																			
comp59012_c1_seq1 GO:0007275 GO:0005840 GO:0043231 GO:0005829 GO:0009987 GO:0005488																																																																	
comp59013_c0_seq9 GO:0005829 GO:0004069 GO:0080130 GO:0042802 GO:0033853 GO:0033854 GO:0009570 GO:0030170 GO:0009095 GO:0009793																																																													
comp59014_c0_seq3 GO:0005829 GO:0015937 GO:0005524 GO:0005515 GO:0016310 GO:0004594 GO:0006487																																																																
comp59015_c0_seq4 GO:0005739 GO:0016020																																																																					
comp59016_c0_seq1 GO:0009507																																																																						
comp59016_c1_seq2 GO:0009753 GO:0055114 GO:0009620 GO:0009611 GO:0009941 GO:0009695 GO:0009535 GO:0009570 GO:0016165 GO:0005506																																																													
comp59017_c0_seq3 GO:0044237 GO:0000166 GO:0050662 GO:0003824																																																																			
comp59018_c1_seq16 GO:0016779 GO:0009941 GO:0009058																																																																				
comp59019_c0_seq1 GO:0090305 GO:0003677 GO:0004518																																																																				
comp59020_c0_seq1 GO:0055085 GO:0005886 GO:0006857																																																																				
comp59021_c0_seq13 GO:0006499 GO:0051788 GO:0009853 GO:0000234 GO:0009536 GO:0005840 GO:0004379 GO:0080129 GO:0005829 GO:0006511 GO:0042425 GO:0010183 GO:0009555 GO:0032259 GO:0019722 GO:0048528 GO:0006656 GO:0010064 GO:0009860																																																				
comp59022_c2_seq20 GO:0006952 GO:0005829 GO:0009693 GO:0008219 GO:0048255 GO:0017091 GO:0005515 GO:0010150 GO:0009738 GO:0005634																																																													
comp59024_c0_seq29 GO:0005739																																																																						
comp59026_c0_seq10 GO:0005777 GO:0009658																																																																					
comp59027_c0_seq8 GO:0046855 GO:0035335 GO:0007243 GO:0004439 GO:0043407 GO:0004725 GO:0008138 GO:0005737																																																															
comp59027_c2_seq1 GO:0046854 GO:0016773 GO:0016301 GO:0048015																																																																			
comp59027_c3_seq2 GO:0001510 GO:0006412 GO:0005730 GO:0009409 GO:0003735 GO:0005774 GO:0009507 GO:0022625 GO:0005794 GO:0005886																																																													
comp59028_c1_seq4 GO:0009789 GO:0009845 GO:0005509 GO:0005739 GO:0016042 GO:0046470 GO:0009941 GO:0030136 GO:0010119 GO:0005546 GO:0004630 GO:0070290 GO:0005773 GO:0046686 GO:0005783 GO:0005634 GO:0005886																																																						
comp59029_c0_seq1 GO:0006468 GO:0009945 GO:0009942 GO:0004674 GO:0009414 GO:0016021 GO:0009409 GO:0051260 GO:0007169 GO:0048508 GO:0010073 GO:0005524 GO:0009808 GO:0010152 GO:0048653 GO:0009846 GO:0005886																																																						
comp59030_c0_seq5 GO:0031348 GO:0009605 GO:0009867 GO:0009862 GO:0009414 GO:0010363 GO:0009873 GO:0006355 GO:0006612 GO:0050832 GO:0043069 GO:0042762 GO:0042538 GO:0000303 GO:0000165 GO:0003677 GO:0009409 GO:0009738 GO:0003700 GO:0009743 GO:0030968 GO:0009733 GO:0071281																																																
comp59031_c0_seq28 GO:0009560 GO:0005730 GO:0000741 GO:0006606 GO:0080008 GO:0006406																																																																	
comp59032_c0_seq6 GO:0005802 GO:0005794 GO:0005768																																																																				
comp59033_c0_seq11 GO:0006468 GO:0055114 GO:0009744 GO:0010224 GO:0004674 GO:0009718 GO:0007169 GO:0016023 GO:0005524 GO:0032440 GO:0005886																																																												
comp59034_c4_seq5 GO:0005737 GO:0010228																																																																					
comp59034_c6_seq1 GO:0003723 GO:0003964 GO:0006278																																																																				
comp59034_c7_seq2 GO:0051788 GO:0006312 GO:0010048 GO:0005515 GO:0043161 GO:0005680 GO:0048829 GO:0010071 GO:0051510 GO:0009560 GO:0005819 GO:0009965 GO:0051302 GO:0032875 GO:0007346 GO:0009504 GO:0009733 GO:0043248																																																					
comp59037_c0_seq6 GO:0016571 GO:0009909 GO:0010048																																																																				
comp59038_c0_seq3 GO:0005886 GO:0006468 GO:0005524 GO:0004674																																																																			
comp59039_c2_seq8 GO:0009506																																																																						
comp59040_c1_seq1 GO:0006468 GO:0005524 GO:0042549 GO:0009507 GO:0009579 GO:0004674																																																																	
comp59040_c3_seq1 GO:0004553 GO:0005975 GO:0009845 GO:0005576 GO:0043169																																																																		
comp59041_c0_seq3 GO:0035304 GO:0009793 GO:0010207 GO:0009902 GO:0005829 GO:0030036 GO:0045893 GO:0004476 GO:0042793 GO:0005886 GO:0006364 GO:0010027																																																											
comp59042_c0_seq3 GO:0046961 GO:0009941 GO:0008270 GO:0008553 GO:0046933 GO:0015991 GO:0005730 GO:0050897 GO:0042777 GO:0005747 GO:0005754 GO:0046686 GO:0006200 GO:0005886 GO:0008266 GO:0005507 GO:0005524 GO:0006979																																																					
comp59042_c1_seq1 GO:0006468 GO:0004674 GO:0016021 GO:0005524 GO:0050794																																																																		
comp59043_c0_seq7 GO:0016174 GO:0010053 GO:0005509 GO:0004601 GO:0009060 GO:0005773 GO:0033198 GO:0022626 GO:0005887																																																														
comp59044_c0_seq1 GO:0008757 GO:0005768 GO:0005794 GO:0052546 GO:0032259 GO:0016021 GO:0005802 GO:0005739																																																															
comp59045_c0_seq1 GO:0005829 GO:0006508 GO:0006486 GO:0010205 GO:0004252 GO:0009507 GO:0005634																																																																
comp59046_c0_seq30 GO:0006370 GO:0004482 GO:0003723 GO:0036265 GO:0015824 GO:0005634																																																																	
comp59047_c0_seq3 GO:0006007																																																																						
comp59049_c2_seq2 GO:0006857 GO:0009624 GO:0005886 GO:0005215																																																																			
comp59051_c0_seq3 GO:0005737																																																																						
comp59053_c0_seq4 GO:0005739 GO:0005515 GO:0009507																																																																				
comp59054_c0_seq5 GO:0031348 GO:0006499 GO:0009605 GO:0009867 GO:0009862 GO:0030243 GO:0010363 GO:0006612 GO:0050832 GO:0009507 GO:0043069 GO:0000165 GO:0048193 GO:0048527 GO:0052542 GO:0009409 GO:0009738 GO:0009832 GO:0016049 GO:0030968 GO:0009723 GO:0005739																																																	
comp59055_c0_seq5 GO:0005488																																																																						
comp59056_c1_seq1 GO:0016459 GO:0005524 GO:0003774																																																																				
comp59056_c2_seq2 GO:0004871 GO:0060151 GO:0016021 GO:0016459 GO:0010584 GO:0030036 GO:0005524 GO:0003774 GO:0003779 GO:0051646 GO:0007165 GO:0051645 GO:0005773 GO:0030048 GO:0005634																																																								
comp59057_c0_seq3 GO:0009789 GO:0009651 GO:0045454 GO:0010305 GO:0005515 GO:0009742 GO:0009734																																																																
comp59058_c0_seq5 GO:0004385 GO:0005524 GO:0010200 GO:0030968 GO:0016310 GO:0005737 GO:0050832 GO:0006163																																																															
comp59059_c2_seq2 GO:0000166																																																																						
comp59061_c0_seq2 GO:0005618 GO:0005509 GO:0060151 GO:0051015 GO:0030036 GO:0009860 GO:0051646 GO:0051645 GO:0009846 GO:0005773 GO:0030048																																																												
comp59063_c0_seq6 GO:0005739 GO:0005783																																																																					
comp59063_c1_seq1 GO:0009407 GO:0006511 GO:0004842 GO:0005634 GO:0009536																																																																		
comp59065_c0_seq4 GO:0005737																																																																						
comp59067_c0_seq12 GO:0004743 GO:0046686 GO:0005886 GO:0016310 GO:0030955 GO:0000287 GO:0006096 GO:0005829																																																															
comp59068_c0_seq2 GO:0005802 GO:0005774 GO:0016023 GO:0016021 GO:0009506 GO:0005794 GO:0005768 GO:0005886																																																															
comp59069_c1_seq8 GO:0005886 GO:0016192 GO:0016021																																																																				
comp59070_c0_seq1 GO:0005829 GO:0055114 GO:0009651 GO:0009269 GO:0009743 GO:0004028 GO:0015996 GO:0009733 GO:0009737 GO:0000303 GO:0006081 GO:0004029 GO:0009873																																																										
comp59072_c0_seq2 GO:0035091 GO:0005886 GO:0007165 GO:0019344 GO:0005634 GO:0005829																																																																	
comp59073_c0_seq2 GO:0005515 GO:0009987 GO:0044238																																																																				
comp59074_c1_seq4 GO:0009627 GO:0015157 GO:0034976 GO:0016023 GO:0005886 GO:0005576 GO:0009507 GO:0005783																																																															
comp59074_c6_seq2 GO:0008270 GO:0009416 GO:0007623 GO:0043565 GO:0003700 GO:0045893 GO:0005634																																																																
comp59076_c0_seq1 GO:0006346 GO:0031048 GO:0005515 GO:0051567 GO:0006869 GO:0009753 GO:0005829 GO:0009560 GO:0006306 GO:0009416 GO:0000062 GO:0005634 GO:0009723																																																										
comp59078_c0_seq1 GO:0005829 GO:0007264 GO:0009506 GO:0009536 GO:0016004 GO:0006471 GO:0006499 GO:0006886 GO:0005773 GO:0005798 GO:0005525																																																												
comp59078_c2_seq10 GO:0046939 GO:0004017 GO:0006354 GO:0009165 GO:0009941 GO:0005524 GO:0009535 GO:0015979																																																															
comp59079_c0_seq5 GO:0010021 GO:0009011 GO:0009501 GO:0009863 GO:0009570 GO:0009814 GO:0005978																																																																
comp59080_c0_seq58 GO:0009880 GO:0050826 GO:0043424 GO:0009168 GO:0003876 GO:0048825 GO:0051301 GO:0009640 GO:0005829 GO:0010564 GO:0019915 GO:0010182 GO:0016567 GO:0009845 GO:0010228 GO:0045595 GO:0048366 GO:0009737 GO:0009165 GO:0009909 GO:0007062 GO:0005634 GO:0010072 GO:0031307 GO:0010162																																														
comp59081_c1_seq12 GO:0005829																																																																						
comp59082_c2_seq12 GO:0006468 GO:0004674 GO:0048364 GO:0009850 GO:0004712 GO:0009741 GO:0005524 GO:0009826 GO:0005737 GO:0005634																																																													
comp59083_c1_seq1 GO:0010048 GO:0005515 GO:0045492 GO:0016926 GO:0043481 GO:0000956 GO:0045892 GO:0005829 GO:0050665 GO:0010228 GO:0010413 GO:0007346 GO:0005634 GO:0048440																																																									
comp59085_c0_seq8 GO:0008284 GO:0005634																																																																					
comp59086_c0_seq1 GO:0009888 GO:0000166 GO:0004672 GO:0016491 GO:0016310 GO:0007165 GO:0009741 GO:0005783 GO:0005886 GO:0048437 GO:0009733																																																												
comp59087_c0_seq15 GO:0005737 GO:0009506 GO:0005524 GO:0016020 GO:0008270																																																																		
comp59088_c0_seq4 GO:0016670 GO:0055114 GO:0030328																																																																				
comp59089_c0_seq2 GO:0047262 GO:0005768 GO:0005794 GO:0010289 GO:0005802 GO:0005739																																																																	
comp59090_c1_seq29 GO:0035304 GO:0009793 GO:0010207 GO:0009902 GO:0005525 GO:0016226 GO:0010228 GO:0031969 GO:0045893 GO:0003824 GO:0042793 GO:0006364 GO:0048481 GO:0010027																																																									
comp59091_c1_seq47 GO:0043169 GO:0044238 GO:0016829 GO:0005739 GO:0042550 GO:0052689 GO:0042372																																																																
comp59092_c0_seq3 GO:0031519 GO:0003727 GO:0009294 GO:0009965 GO:0006349 GO:0010228 GO:0003677 GO:0005515 GO:0045857 GO:0008168 GO:0016571																																																												
comp59092_c2_seq1 GO:0034968 GO:0018024																																																																					
comp59093_c0_seq9 GO:0006355 GO:0003677 GO:0046983 GO:0009734 GO:0005634																																																																		
comp59094_c1_seq4 GO:0005829 GO:0048767 GO:0005739 GO:0010449 GO:0004326 GO:0006730 GO:0046901 GO:0005524 GO:0009570																																																														
comp59095_c0_seq29 GO:0005739 GO:0009706																																																																					
comp59096_c1_seq4 GO:0046855 GO:0052542 GO:0009753 GO:0055114 GO:0009845 GO:0009414 GO:0009611 GO:0042538 GO:0009733 GO:0046854 GO:0004445 GO:0032440 GO:0009738 GO:0009723 GO:0032957																																																								
comp59097_c1_seq1 GO:0005488																																																																						
comp59097_c2_seq6 GO:0055063 GO:0071486 GO:0006355 GO:0009650 GO:0007623 GO:0000719 GO:0003700 GO:0003904 GO:0016036 GO:0005634																																																													
comp59098_c1_seq1 GO:0031348 GO:0045087 GO:0010200 GO:0006944 GO:0030968 GO:0009863 GO:0004168 GO:0004605 GO:0008654 GO:0016020 GO:0009697																																																												
comp59099_c0_seq4 GO:0003676 GO:0000166																																																																					
comp59101_c0_seq1 GO:0005634 GO:0008270																																																																					
comp59102_c0_seq3 GO:0006952 GO:0005886 GO:0008219 GO:0016021 GO:0005739 GO:0005516																																																																	
comp59104_c2_seq9 GO:0042149 GO:0046777 GO:0005515 GO:0030295 GO:0005634 GO:0004674																																																																	
comp59105_c0_seq2 GO:0007275 GO:0048856																																																																					
comp59106_c0_seq1 GO:0055085 GO:0016020 GO:0022857																																																																				
comp59107_c0_seq7 GO:0043086 GO:0006508 GO:0042802 GO:0004252																																																																			
comp59109_c0_seq2 GO:0006457 GO:0046686 GO:0009506 GO:0005886 GO:0005618 GO:0005524 GO:0032440 GO:0005634 GO:0005829 GO:0009408 GO:0055114																																																												
comp59110_c0_seq10 GO:0016760 GO:0030244 GO:0016021																																																																				
comp59111_c0_seq1 GO:0006412 GO:0005840 GO:0003735 GO:0003700 GO:0032968 GO:0006352 GO:0000394 GO:0005634																																																															
comp59112_c0_seq2 GO:0007015 GO:0009506 GO:0005886 GO:0048278 GO:0006887 GO:0000145 GO:0005829																																																																
comp59113_c0_seq1 GO:0005737 GO:0006944 GO:0035556 GO:0007205 GO:0016310 GO:0005509 GO:0004143																																																																
comp59114_c0_seq4 GO:0005488																																																																						
comp59115_c0_seq2 GO:0016301 GO:0005576 GO:0009506 GO:0009505 GO:0016310 GO:0005199																																																																	
comp59115_c1_seq7 GO:0005515 GO:0005524 GO:0003684 GO:0009507 GO:0006298																																																																		
comp59116_c0_seq13 GO:0010413 GO:0055114 GO:0008295 GO:0006520 GO:0045492 GO:0000166 GO:0005737 GO:0004354																																																															
comp59117_c0_seq5 GO:0009506																																																																						
comp59118_c0_seq1 GO:0005773 GO:0043169 GO:0006004 GO:0016023 GO:0007155 GO:0006516 GO:0004560																																																																
comp59119_c1_seq15 GO:0006810 GO:0042626 GO:0000325 GO:0005774 GO:0016491 GO:0000166 GO:0044237 GO:0005886																																																															
comp59120_c0_seq2 GO:0006468 GO:0004674 GO:0016021 GO:0010075 GO:0016023 GO:0005524 GO:0048653 GO:0007020 GO:0005576 GO:0004715 GO:0005886																																																												
comp59121_c0_seq16 GO:0009941 GO:0031048 GO:0080188 GO:0045132 GO:0031935 GO:0009855 GO:0010051 GO:0009887 GO:0009506 GO:0016887 GO:0048439 GO:0007062 GO:0005634 GO:0005524																																																									
comp59122_c0_seq3 GO:0006470 GO:0046872 GO:0004722 GO:0008287																																																																			
comp59123_c0_seq4 GO:0008568 GO:0005524 GO:0005886																																																																				
comp59124_c0_seq1 GO:0009086 GO:0000394																																																																					
comp59125_c0_seq46 GO:0004185 GO:0005789 GO:0005773 GO:0005777 GO:0016023 GO:0005576 GO:0006508 GO:0005829																																																															
comp59126_c0_seq2 GO:0005739 GO:0005634 GO:0005886																																																																				
comp59127_c0_seq1 GO:0005886 GO:0000271 GO:0005524 GO:0007165 GO:0017111 GO:0009630 GO:0005634 GO:0009536																																																															
comp59128_c0_seq1 GO:0006275 GO:0007131 GO:0000911 GO:0051567 GO:0008283 GO:0006342 GO:0005737 GO:0010564 GO:0005874 GO:0003777 GO:0007020 GO:0006306 GO:0007067 GO:0010228 GO:0051322 GO:0007129 GO:0009909 GO:0006270 GO:0007018 GO:0005886 GO:0005524																																																		
comp59129_c0_seq1 GO:0051536 GO:0006200 GO:0009055 GO:0051604 GO:0005524 GO:0015408																																																																	
comp59130_c1_seq8 GO:0042802 GO:0016984 GO:0006468 GO:0015977 GO:0005524 GO:0000287 GO:0009507 GO:0005634 GO:0004674																																																														
comp59131_c0_seq4 GO:0009086 GO:0006468 GO:0055114 GO:0004674 GO:0016021 GO:0007169 GO:0004713 GO:0005524 GO:0032440 GO:0000394 GO:0005886																																																												
comp59132_c0_seq1 GO:0010474 GO:0009753 GO:0010193 GO:0010471 GO:0010475 GO:0042742 GO:0080048 GO:0009408 GO:0008928 GO:0052544 GO:0010473 GO:0010472 GO:0019853 GO:0080046																																																									
comp59132_c1_seq2 GO:0000226 GO:0006346 GO:0007267 GO:0006275 GO:0007131 GO:0008270 GO:0006261 GO:0051287 GO:0000911 GO:0051567 GO:0000724 GO:0032440 GO:0009855 GO:0048449 GO:0010564 GO:0003950 GO:0006306 GO:0016444 GO:0007067 GO:0003677 GO:0009555 GO:0051322 GO:0010014 GO:0010212 GO:0035196 GO:0009737 GO:0055114 GO:0007129 GO:0010267 GO:0045893 GO:0009909 GO:0043687 GO:0010073 GO:0005634 GO:0006979 GO:0009616 GO:0006471																																		
comp59133_c0_seq2 GO:0009744 GO:0008460 GO:0000166 GO:0010253 GO:0010489 GO:0009507 GO:0045226 GO:0010214 GO:0050377 GO:0005829 GO:0051555 GO:0050662 GO:0010224 GO:0010315 GO:0010192 GO:0008831 GO:0010490 GO:0009506 GO:0010280																																																				
comp59134_c0_seq14 GO:0005829 GO:0006633 GO:0030955 GO:0010431 GO:0005739 GO:0004743 GO:0000287 GO:0006096 GO:0016310 GO:0009570 GO:0046686																																																												
comp59134_c1_seq1 GO:0006629 GO:0016788																																																																					
comp59135_c0_seq2 GO:0016021 GO:0019375 GO:0045892 GO:0016036 GO:0006817 GO:0005886																																																																	
comp59136_c0_seq72 GO:0006952 GO:0008909 GO:0009617 GO:0009507 GO:0042372																																																																		
comp59138_c0_seq2 GO:0006396 GO:0022402 GO:0042742 GO:0006355 GO:0009870 GO:0051301 GO:0003677 GO:0005515 GO:0010204 GO:0003700 GO:0009507 GO:0050832 GO:0005634																																																										
comp59139_c0_seq11 GO:0031348 GO:0016174 GO:0050660 GO:0009611 GO:0009605 GO:0010119 GO:0009867 GO:0009697 GO:0009862 GO:0009414 GO:0010363 GO:0033500 GO:0002679 GO:0009873 GO:0016926 GO:0009055 GO:0006612 GO:0005509 GO:0050832 GO:0043069 GO:0004601 GO:0042538 GO:0000165 GO:0050665 GO:0005506 GO:0010228 GO:0007231 GO:0052542 GO:0009409 GO:0009738 GO:0055114 GO:0005887 GO:0030968 GO:0009733																																					
comp59140_c0_seq2 GO:0003700 GO:0045893 GO:0005634 GO:0000976																																																																			
comp59141_c0_seq15 GO:0008793 GO:0009693 GO:0030170 GO:0042218 GO:0004069 GO:0016847																																																																	
comp59142_c0_seq3 GO:0008883 GO:0055114 GO:0000302 GO:0009416 GO:0010039 GO:0015995 GO:0006782 GO:0055072 GO:0005515 GO:0050661 GO:0009507																																																												
comp59143_c2_seq4 GO:0009880 GO:0050826 GO:0007131 GO:0007155 GO:0009944 GO:0045010 GO:0045132 GO:0033044 GO:0006355 GO:0010075 GO:0048825 GO:0042138 GO:0051301 GO:0009855 GO:0009640 GO:0010564 GO:0019915 GO:0010051 GO:0010182 GO:0009965 GO:0010090 GO:0016567 GO:0080060 GO:0043565 GO:0009845 GO:0048765 GO:0010228 GO:0045595 GO:0003700 GO:0016049 GO:0009909 GO:0007062 GO:0005634 GO:0010072 GO:0071555 GO:0010162																																			
comp59144_c0_seq2 GO:0016023 GO:0005739																																																																					
comp59145_c0_seq7 GO:0005634 GO:0005886 GO:0006950																																																																				
comp59147_c0_seq1 GO:0016874 GO:0045492 GO:0010413																																																																				
comp59148_c0_seq1 GO:0005730 GO:0009744 GO:0003723 GO:0009749 GO:0009507 GO:0010252																																																																	
comp59150_c0_seq35 GO:0005488 GO:0009507																																																																					
comp59151_c0_seq5 GO:0005634																																																																						
comp59152_c0_seq52 GO:0042907 GO:0015720 GO:0005274 GO:0015857 GO:0015505 GO:0016023 GO:0005886 GO:0042906 GO:0009507																																																														
comp59154_c0_seq9 GO:0008152 GO:0003824																																																																					
comp59155_c0_seq13 GO:0003677 GO:0016023 GO:0006355																																																																				
comp59156_c0_seq4 GO:0016021 GO:0009506 GO:0015662 GO:0005768 GO:0016023 GO:0005524 GO:0015914 GO:0000287 GO:0005802 GO:0008152 GO:0004012 GO:0006812 GO:0005794 GO:0005634																																																									
comp59157_c0_seq1 GO:0016558 GO:0010351 GO:0006891 GO:0006869 GO:0006888 GO:0016020 GO:0005634 GO:0005783 GO:0009536																																																														
comp59157_c1_seq1 GO:0006468 GO:0005524 GO:0004674																																																																				
comp59158_c1_seq8 GO:0006996 GO:0031966																																																																					
comp59158_c2_seq25 GO:0009630 GO:0000226 GO:0007131 GO:0051567 GO:0009524 GO:0006342 GO:0006886 GO:0010564 GO:0005874 GO:0008017 GO:0005819 GO:0051322 GO:0016572 GO:0009506 GO:0007129 GO:0009574 GO:0005634 GO:0030981 GO:0009920																																																				
comp59158_c3_seq2 GO:0006979 GO:0000213 GO:0009753 GO:0009744 GO:0003676 GO:0009750 GO:0009611 GO:0005515 GO:0007568 GO:0000214 GO:0009507 GO:0006388																																																											
comp59159_c0_seq1 GO:0005739 GO:0016830 GO:0009507																																																																				
comp59159_c1_seq11 GO:0004180																																																																						
comp59160_c0_seq6 GO:0005829 GO:0004888 GO:0005515 GO:0003924 GO:0045036 GO:0009707 GO:0005525																																																																
comp59161_c1_seq4 GO:0016740 GO:0016829																																																																					
comp59162_c0_seq24 GO:0008270 GO:0005739 GO:0045892 GO:0006914																																																																			
comp59163_c0_seq13 GO:0010090 GO:0071555 GO:0009733 GO:0007155 GO:0048765 GO:0045010 GO:0042803																																																																
comp59165_c1_seq6 GO:2000022 GO:2000031 GO:0009817 GO:0005634 GO:0009816																																																																		
comp59166_c0_seq7 GO:0046686 GO:0016023 GO:0048046 GO:0018738 GO:0009536 GO:0004091																																																																	
comp59167_c0_seq5 GO:0010103 GO:0004871 GO:0010584 GO:0009825 GO:0010268 GO:0009911 GO:0009729 GO:0016787 GO:0042742 GO:0016021 GO:0043481 GO:0048767 GO:0046982 GO:0010817 GO:0006468 GO:0004674 GO:0000271 GO:0010224 GO:0048657 GO:0043234 GO:0009742 GO:0005496 GO:0005768 GO:0048366 GO:0009932 GO:0042803 GO:0002237 GO:0005886 GO:0005524 GO:0071555																																									
comp59168_c0_seq1 GO:0009536																																																																						
comp59168_c1_seq1 GO:0009651 GO:0009536 GO:0009860 GO:0005515 GO:0034613 GO:0009827 GO:0005634 GO:0005886																																																															
comp59168_c2_seq5 GO:0005739 GO:0006661 GO:0009536																																																																				
comp59169_c6_seq2 GO:0046658 GO:0009506 GO:0005634																																																																				
comp59170_c0_seq15 GO:0007018 GO:0005886 GO:0005524 GO:0005739 GO:0003777 GO:0005874																																																																	
comp59172_c0_seq10 GO:0005886																																																																						
comp59173_c1_seq3 GO:0010413 GO:0046855 GO:0004439 GO:0009506 GO:0045492 GO:0005634 GO:0032957																																																																
comp59174_c3_seq5 GO:0007018 GO:0009506 GO:0005886 GO:0005524 GO:0003777 GO:0005874																																																																	
comp59175_c0_seq4 GO:0043161 GO:0051788 GO:0080129 GO:0006635 GO:0009407 GO:0006914 GO:0016020 GO:0005634																																																															
comp59176_c0_seq26 GO:0008270 GO:0003677																																																																					
comp59176_c1_seq2 GO:0004175 GO:0016485 GO:0005576 GO:0006508 GO:0016020 GO:0005783 GO:0080120 GO:0034613																																																															
comp59177_c0_seq1 GO:0016760 GO:0030244 GO:0016021																																																																				
comp59178_c2_seq39 GO:0033773 GO:0009055 GO:0005506 GO:0020037 GO:0016020 GO:0070330 GO:0055114																																																																
comp59179_c1_seq7 GO:0048765 GO:0016757 GO:0005794 GO:0009507																																																																			
comp59179_c3_seq5 GO:0009684 GO:0051707 GO:0006954 GO:0005777 GO:0006569 GO:0009507																																																																	
comp59180_c0_seq26 GO:0016310 GO:0006014 GO:0009507 GO:0004747																																																																			
comp59181_c3_seq30 GO:0009987																																																																						
comp59182_c0_seq2 GO:0042147 GO:0016049 GO:0030904 GO:0005771 GO:0006623 GO:0030244 GO:0000902 GO:0008333 GO:0006944 GO:0048193 GO:0009507																																																												
comp59183_c0_seq3 GO:0005634 GO:0003677 GO:0009536																																																																				
comp59184_c0_seq1 GO:0005622 GO:0007165																																																																					
comp59184_c2_seq2 GO:0050896 GO:0032559																																																																					
comp59185_c0_seq3 GO:0003917 GO:0050826 GO:0048645 GO:0005515 GO:0009793 GO:0001676 GO:0010075 GO:0006259 GO:0009640 GO:0006633 GO:0019915 GO:0019827 GO:0010182 GO:0009965 GO:0009933 GO:0016567 GO:0009845 GO:0006338 GO:0010228 GO:0002213 GO:0043229 GO:0009909 GO:0048439 GO:0010162																																															
comp59187_c0_seq17 GO:0016310 GO:0004674 GO:0000166																																																																				
comp59188_c0_seq8 GO:0005802 GO:0005794 GO:0005768 GO:0032259 GO:0008168																																																																		
comp59189_c0_seq9 GO:0048513																																																																						
comp59191_c2_seq1 GO:0055028 GO:0007155 GO:0045010 GO:0043622 GO:0010090 GO:0006468 GO:0004674 GO:0048765 GO:0005634 GO:0005524 GO:0071555																																																												
comp59192_c1_seq1 GO:0016021 GO:0008320 GO:0006886																																																																				
comp59192_c2_seq1 GO:0016021 GO:0008320 GO:0006886																																																																				
comp59193_c0_seq6 GO:0000226 GO:0016020 GO:0016192 GO:0005634 GO:0051322																																																																		
comp59194_c0_seq26 GO:0005978 GO:0009501 GO:0009011 GO:0019252 GO:0009507 GO:0000166																																																																	
comp59195_c0_seq1 GO:0005737 GO:0006107 GO:0015977 GO:0000287 GO:0006099 GO:0008964																																																																	
comp59196_c0_seq1 GO:0016021 GO:0046872 GO:0006200 GO:0015662 GO:0006754 GO:0005524 GO:0006812																																																																
comp59196_c1_seq9 GO:0007131 GO:0019829 GO:0008553 GO:0005773 GO:0045132 GO:0033044 GO:0009651 GO:0007033 GO:0010023 GO:0042138 GO:0016021 GO:0009507 GO:0007035 GO:0046872 GO:0006754 GO:0006812 GO:0009506 GO:0007129 GO:0010382 GO:0006200 GO:0007062 GO:0005886 GO:0005524 GO:0010089																																															
comp59197_c0_seq1 GO:0009407 GO:0046872 GO:0006979 GO:0046686 GO:0005886 GO:0020037 GO:0004601 GO:0051920 GO:0009507 GO:0005829 GO:0055114																																																												
comp59197_c1_seq2 GO:0009536 GO:0010048 GO:0010541 GO:0015408 GO:0007155 GO:0009793 GO:0045010 GO:0009958 GO:0009624 GO:0016021 GO:0043481 GO:0010329 GO:0009640 GO:0010540 GO:0010090 GO:0008361 GO:0010315 GO:0009637 GO:0048765 GO:0008559 GO:0010228 GO:0009506 GO:0055085 GO:0006200 GO:0005886 GO:0005516 GO:0005524 GO:0048443 GO:0048440 GO:0071555																																									
comp59198_c0_seq5 GO:0055114 GO:0008544 GO:0016023 GO:0016310 GO:0016301 GO:0032440 GO:0009790																																																																
comp59199_c0_seq1 GO:0046872 GO:0019243 GO:0004222 GO:0046686 GO:0009570 GO:0006508 GO:0005829 GO:0048046 GO:0005739																																																														
comp59200_c0_seq7 GO:0046872 GO:0016992 GO:0051539 GO:0009507 GO:0009107																																																																		
comp59202_c1_seq9 GO:0003899 GO:0010114 GO:0005739 GO:0010264 GO:0003677 GO:0009658 GO:0071483 GO:0001053 GO:0003700 GO:0010207 GO:0006352 GO:0010218 GO:0009507 GO:0045893																																																									
comp59203_c0_seq1 GO:0003743 GO:0006413 GO:0005829 GO:0009744 GO:0009750 GO:0009651 GO:0032259 GO:0009723 GO:0009734 GO:0008168 GO:0005794 GO:0005634																																																											
comp59204_c0_seq7 GO:0016023 GO:0005634																																																																					
comp59205_c0_seq5 GO:0004386 GO:0003677 GO:0016023 GO:0005524 GO:0016020 GO:0005634 GO:0009536																																																																
comp59205_c1_seq7 GO:0010103 GO:0004832 GO:0045036 GO:0009793 GO:0006450 GO:0016556 GO:0016226 GO:0009570 GO:0006438 GO:0010228 GO:0009658 GO:0002161 GO:0006364 GO:0005524 GO:0048481 GO:0010027 GO:0005739																																																						
comp59206_c0_seq1 GO:0006399 GO:0009536 GO:0031167 GO:0009793 GO:0008168 GO:0051607 GO:0016226 GO:0009658 GO:0035196 GO:0010267 GO:0045893 GO:0042793																																																											
comp59206_c3_seq3 GO:0009941 GO:0005886 GO:0008565 GO:0016021 GO:0009306 GO:0009535																																																																	
comp59206_c4_seq2 GO:0005634 GO:0009536																																																																					
comp59206_c5_seq7 GO:0009651 GO:0006914																																																																					
comp59208_c2_seq5 GO:0009880 GO:0050826 GO:0045492 GO:0048825 GO:0051301 GO:0009507 GO:0009640 GO:0010564 GO:0006723 GO:0019915 GO:0010182 GO:0016567 GO:0006486 GO:0009845 GO:0010228 GO:0045595 GO:0010413 GO:0048366 GO:0009909 GO:0007062 GO:0010072 GO:0010162																																																	
comp59210_c0_seq1 GO:0005634																																																																						
comp59210_c1_seq1 GO:0009749 GO:0009744 GO:0008270 GO:0009750 GO:0005739 GO:0016021 GO:0043090 GO:0015662 GO:0005524 GO:0015914 GO:0000287 GO:0006888 GO:0008152 GO:0004012 GO:0006812 GO:0030048 GO:0005886																																																						
comp59212_c0_seq11 GO:0006468 GO:0004674 GO:0005524 GO:0005886																																																																			
comp59214_c0_seq1 GO:0034976 GO:0009651 GO:0006364 GO:0009627 GO:0006486 GO:0009507 GO:0004579 GO:0005783 GO:0005886																																																														
comp59216_c1_seq1 GO:0001510 GO:0005829 GO:0009220 GO:0005515 GO:0009507 GO:0005773																																																																	
comp59217_c0_seq5 GO:0004315 GO:0006633																																																																					
comp59218_c0_seq11 GO:0000145 GO:0005829 GO:0005886																																																																				
comp37394_c0_seq1 GO:0016918 GO:0008431																																																																					
comp37396_c0_seq1 GO:0004591 GO:0030976 GO:0006099																																																																				
comp37407_c0_seq1 GO:0090404 GO:0046910 GO:0009860 GO:0012505																																																																			
comp37415_c0_seq1 GO:0046686 GO:0045492 GO:0016740 GO:0010413 GO:0005634 GO:0005829																																																																	
comp37420_c0_seq1 GO:0016491 GO:0044281 GO:0046483 GO:0034641																																																																			
comp37421_c0_seq1 GO:0005789 GO:0004683 GO:0005777 GO:0046777 GO:0005515 GO:0005509 GO:0005524 GO:0009507																																																															
comp37422_c0_seq1 GO:0016132 GO:0055114 GO:0015706 GO:0009693 GO:0009815 GO:0046872 GO:0016706 GO:0010106 GO:0031418 GO:0006826 GO:0010167 GO:0005737 GO:0009835																																																										
comp37429_c0_seq1 GO:0071704 GO:0044267 GO:0009058 GO:0005737 GO:0071842 GO:0009579 GO:0003824																																																																
comp37453_c0_seq1 GO:0000786 GO:0005730 GO:0003677 GO:0006334 GO:0009507																																																																		
comp37475_c0_seq1 GO:0005622 GO:0006950 GO:0008270 GO:0009416 GO:0009266																																																																		
comp37485_c0_seq1 GO:0008233																																																																						
comp37486_c0_seq1 GO:0006856 GO:0007264 GO:0006727 GO:0003924 GO:0008355 GO:0008057 GO:0015031 GO:0005525																																																															
comp37496_c0_seq1 GO:0007411 GO:0030669 GO:0042059 GO:0005802 GO:0048011 GO:0030131 GO:0048268 GO:0016032 GO:0007269 GO:0008565 GO:0006886 GO:0005829 GO:0005905 GO:0030276 GO:0019886 GO:0050690 GO:0032403 GO:0005886 GO:0048488																																																				
comp37509_c0_seq1 GO:0005737 GO:0046872 GO:0019509 GO:0010309 GO:0005634 GO:0055114																																																																	
comp37545_c0_seq1 GO:0010598 GO:0016655 GO:0048038 GO:0010258 GO:0009535 GO:0055114																																																																	
comp37555_c0_seq1 GO:0042538 GO:0009414 GO:0009409 GO:0042546 GO:0016787 GO:0009737 GO:0009536																																																																
comp37578_c0_seq1 GO:0005975 GO:0005576 GO:0004650 GO:0007047																																																																			
comp37580_c0_seq1 GO:0003824																																																																						
comp37606_c0_seq1 GO:0007269 GO:0048488 GO:0016301 GO:0016310																																																																			
comp37615_c0_seq1 GO:0016671 GO:0009055 GO:0045454 GO:0006662 GO:0005759 GO:0015035																																																																	
comp37619_c0_seq1 GO:0016740																																																																						
comp37622_c0_seq1 GO:0008258 GO:0017133 GO:0007443 GO:0009055 GO:0048567 GO:0050660 GO:0006119 GO:0007424 GO:0005811																																																														
comp37634_c0_seq1 GO:0007030 GO:0006833 GO:0046686 GO:0005886 GO:0006972 GO:0008806 GO:0006096 GO:0005634 GO:0005829 GO:0048046 GO:0009651 GO:0009266																																																											
comp37649_c1_seq1 GO:0016491																																																																						
comp37658_c0_seq1 GO:0005737																																																																						
comp37659_c0_seq3 GO:0019344 GO:0005576 GO:0047617 GO:0005739																																																																			
comp37663_c0_seq1 GO:0046872																																																																						
comp37675_c0_seq1 GO:0008152 GO:0016787																																																																					
comp37675_c1_seq1 GO:0008152 GO:0016787																																																																					
comp37679_c0_seq1 GO:0008380 GO:0005681																																																																					
comp37686_c0_seq1 GO:0005840 GO:0003735 GO:0006412																																																																				
comp37695_c0_seq1 GO:0008152 GO:0005739 GO:0052689																																																																				
comp37696_c0_seq1 GO:0005634																																																																						
comp37702_c1_seq1 GO:0008152 GO:0016491																																																																					
comp37721_c0_seq1 GO:0016021																																																																						
comp37731_c0_seq1 GO:0009536																																																																						
comp37732_c0_seq1 GO:0007018 GO:0005525 GO:0051258 GO:0005198 GO:0005874																																																																		
comp37732_c1_seq1 GO:0005874 GO:0051258 GO:0006184 GO:0007018 GO:0003924 GO:0005198 GO:0005525																																																																
comp37737_c0_seq1 GO:0016020 GO:0016023 GO:0006950 GO:0005739																																																																			
comp37738_c0_seq1 GO:0009627 GO:0042742 GO:0009817 GO:0005618 GO:0008061 GO:0005576 GO:0009723 GO:0080027 GO:0009615 GO:0009651																																																													
comp37762_c0_seq1 GO:0003676 GO:0000398 GO:0030532 GO:0071011 GO:0071013																																																																		
comp37768_c0_seq1 GO:0005829 GO:0006777 GO:0018283 GO:0006461 GO:0006767 GO:0031071 GO:0005759 GO:0042803 GO:0030170 GO:0005634 GO:0006534																																																												
comp37776_c0_seq1 GO:0005737 GO:0019773 GO:0006511 GO:0005634 GO:0004298																																																																		
comp37778_c0_seq1 GO:0016772																																																																						
comp37780_c0_seq1 GO:0005545 GO:0030118 GO:0030276 GO:0048268																																																																			
comp37789_c0_seq1 GO:0015035 GO:0031348 GO:0009611 GO:0009605 GO:0005515 GO:0009867 GO:0035304 GO:0009862 GO:0009414 GO:0010363 GO:0009693 GO:0010310 GO:0006355 GO:0009410 GO:0009055 GO:0006612 GO:0050832 GO:0042742 GO:0043069 GO:0005737 GO:0042538 GO:0045454 GO:0000165 GO:0009695 GO:0009409 GO:0009738 GO:0030968 GO:0009723 GO:0009733																																										
comp37791_c0_seq1 GO:0005829 GO:0005739 GO:0046872 GO:0009240 GO:0015995 GO:0009908 GO:0050992 GO:0016114 GO:0004452 GO:0015979 GO:0009507 GO:0016787																																																											
comp37805_c0_seq3 GO:0016020																																																																						
comp37809_c0_seq1 GO:0005789 GO:0006987																																																																					
comp37812_c1_seq1 GO:0006457 GO:0005737 GO:0051082 GO:0005524																																																																			
comp37817_c0_seq1 GO:0006098 GO:0009941 GO:0016020 GO:0009793 GO:0006412 GO:0010207 GO:0019288 GO:0015934 GO:0009570 GO:0006354 GO:0003735 GO:0009657 GO:0006364 GO:0019843																																																									
comp37832_c1_seq1 GO:0006468 GO:0005524 GO:0004674																																																																				
comp37835_c0_seq1 GO:0005576 GO:0006301																																																																					
comp37841_c0_seq2 GO:0019216 GO:0010506 GO:0004768 GO:0006633 GO:0048047 GO:0006723 GO:0042811 GO:0031410 GO:0060179 GO:0005811 GO:0005783																																																												
comp37849_c0_seq2 GO:0005516 GO:0008219 GO:0006857 GO:0002679 GO:0010200 GO:0015824 GO:0010150 GO:0009817 GO:0010583 GO:0009407 GO:0005634 GO:0005886																																																											
comp37850_c0_seq1 GO:0046686 GO:0009750 GO:0006807 GO:0000257 GO:0009744 GO:0009749 GO:0009536																																																																
comp37851_c0_seq1 GO:0046872 GO:0003676 GO:0015074																																																																				
comp37860_c0_seq3 GO:0030001 GO:0046872 GO:0005634																																																																				
comp37865_c0_seq1 GO:0005524 GO:0006950																																																																					
comp37878_c0_seq1 GO:0010224 GO:0003677 GO:0007094 GO:0005634 GO:0006974																																																																		
comp37921_c0_seq1 GO:0010103 GO:0006364 GO:0009535 GO:0009657 GO:0010207 GO:0043085 GO:0035304																																																																
comp37929_c1_seq1 GO:0006556 GO:0004478 GO:0005524																																																																				
comp37938_c0_seq1 GO:0005852 GO:0006413 GO:0003743																																																																				
comp37943_c1_seq1 GO:0016301 GO:0016310																																																																					
comp37959_c0_seq2 GO:0003677																																																																						
comp37964_c0_seq1 GO:0005515 GO:0006511 GO:0005524 GO:0070936 GO:0004842 GO:0070979																																																																	
comp37970_c0_seq1 GO:0009987																																																																						
comp37983_c0_seq1 GO:0048868 GO:0055114 GO:0048767 GO:0005509 GO:0005739 GO:0048610 GO:0009409 GO:0032440 GO:0005634																																																														
comp37998_c0_seq1 GO:0005840																																																																						
comp38018_c0_seq1 GO:0015031 GO:0005093																																																																					
comp38020_c0_seq2 GO:0050796 GO:0015207 GO:0005743 GO:0007059 GO:0042645 GO:0005515 GO:0071817 GO:0019048 GO:0006112 GO:0044281 GO:0015853 GO:0005887																																																											
comp38023_c0_seq2 GO:0048193 GO:0030244																																																																					
comp38030_c0_seq1 GO:0016301 GO:0016310																																																																					
comp38030_c1_seq1 GO:0016301 GO:0016310																																																																					
comp38046_c0_seq1 GO:0008152 GO:0016491																																																																					
comp38070_c0_seq1 GO:0000312 GO:0006412 GO:0043531 GO:0009295 GO:0009626 GO:0019843 GO:0006354 GO:0003735 GO:0006091 GO:0009941 GO:0005763 GO:0005515 GO:0009570 GO:0015979 GO:0005886																																																								
comp38075_c0_seq1 GO:0008152 GO:0009536 GO:0003824																																																																				
comp38080_c0_seq1 GO:0003676 GO:0005524 GO:0008026																																																																				
comp38104_c0_seq2 GO:0005975 GO:0004610 GO:0004615 GO:0006048 GO:0009570 GO:0005829																																																																	
comp38107_c0_seq1 GO:0005773 GO:0009826 GO:0048510 GO:0009640 GO:0005634 GO:0009741 GO:0009536 GO:0005739																																																															
comp38118_c0_seq1 GO:0006468 GO:0005524 GO:0004674																																																																				
comp38118_c1_seq1 GO:0016301 GO:0009987																																																																					
comp38122_c0_seq1 GO:0016874 GO:0006511																																																																					
comp38126_c0_seq1 GO:0015450 GO:0005744 GO:0006886																																																																				
comp38140_c0_seq1 GO:0080167 GO:0009813 GO:0045430																																																																				
comp38164_c0_seq1 GO:0007018 GO:0005525 GO:0051258 GO:0005198 GO:0005874																																																																		
comp38180_c1_seq1 GO:0016818 GO:1901363 GO:0097159																																																																				
comp38198_c1_seq1 GO:0003964																																																																						
comp38204_c0_seq1 GO:0009863 GO:0009627 GO:0034976 GO:0006865																																																																			
comp38221_c0_seq1 GO:0055114 GO:0005739 GO:0004656 GO:0031418 GO:0018401 GO:0005576 GO:0005506 GO:0005794 GO:0006487																																																														
comp38239_c0_seq1 GO:0055114 GO:0016491 GO:0045892 GO:0005737 GO:0010181 GO:0005886																																																																	
comp38244_c1_seq1 GO:0008535 GO:0017004 GO:0015886 GO:0015232 GO:0016020 GO:0005739																																																																	
comp38260_c0_seq2 GO:0051084 GO:0051258 GO:0000226 GO:0005881 GO:0006184 GO:0007018 GO:0005515 GO:0003924 GO:0005200 GO:0005525																																																													
comp38266_c0_seq1 GO:0034080 GO:0000786 GO:0045653 GO:0000723 GO:0048015 GO:0003677 GO:0005515 GO:0005576 GO:0005654																																																														
comp38274_c0_seq1 GO:0008097 GO:0003735 GO:0005515 GO:0022625 GO:0006412																																																																		
comp38290_c0_seq1 GO:0006468 GO:0005524 GO:0004674																																																																				
comp38293_c1_seq1 GO:0033926																																																																						
comp38308_c0_seq1 GO:0016491 GO:0009813 GO:0033808 GO:0000166 GO:0055114																																																																		
comp38316_c0_seq1 GO:0042067 GO:0046331 GO:0005515 GO:0030162 GO:0007349 GO:0042308 GO:0016567 GO:0043065 GO:0046330 GO:0005634 GO:0045879																																																												
comp38324_c0_seq1 GO:0009414 GO:0051865 GO:0010200 GO:0002679 GO:0004842 GO:0015824 GO:0005829 GO:0000151																																																															
comp38333_c0_seq1 GO:0004222 GO:0030163 GO:0005524 GO:0016021 GO:0017111 GO:0006508 GO:0008270																																																																
comp38333_c1_seq1 GO:0004222 GO:0005524 GO:0006508 GO:0009536																																																																			
comp38336_c0_seq3 GO:0009739 GO:0005576 GO:0016023																																																																				
comp38339_c0_seq1 GO:0003743 GO:0006413 GO:0003746 GO:0006452 GO:0008612 GO:0045905 GO:0043022 GO:0045901 GO:0005737																																																														
comp38349_c0_seq1 GO:0005488 GO:0003978 GO:0006012																																																																				
comp38350_c0_seq1 GO:0035556 GO:0000160 GO:0005622 GO:0000156 GO:0006355																																																																		
comp38351_c0_seq1 GO:0016491 GO:0055114																																																																					
comp38358_c2_seq1 GO:0015416 GO:0006200 GO:0005524																																																																				
comp38380_c0_seq1 GO:0005886																																																																						
comp38396_c1_seq1 GO:0009987 GO:0006810 GO:0005488																																																																				
comp38432_c0_seq1 GO:0006623 GO:0002020 GO:0005794 GO:0005543 GO:0005884 GO:0030276 GO:0009579																																																																
comp38442_c0_seq1 GO:0003917 GO:0003918 GO:0005694 GO:0006265																																																																			
comp38456_c0_seq1 GO:0005730 GO:0005886 GO:0022627 GO:0009507																																																																			
comp38462_c0_seq1 GO:0046686 GO:0008865 GO:0016310 GO:0006014 GO:0004747																																																																		
comp38496_c0_seq1 GO:0003723 GO:0003964 GO:0006278																																																																				
comp38500_c0_seq2 GO:0016740																																																																						
comp38508_c1_seq2 GO:0009411 GO:0008270 GO:0009813 GO:0005622 GO:0006355 GO:0007623																																																																	
comp38525_c0_seq1 GO:0009788 GO:0005829 GO:0006468 GO:0005524 GO:0004683																																																																		
comp38540_c1_seq1 GO:0016301 GO:0044237																																																																					
comp38553_c0_seq1 GO:0016132 GO:0006979 GO:0005829 GO:0005507 GO:0005618 GO:0008270 GO:0009414 GO:0005509 GO:0005739 GO:0009651 GO:0009409 GO:0005544 GO:0006084 GO:0004601 GO:0009408 GO:0009986 GO:0009579 GO:0005524 GO:0015774 GO:0009737 GO:0009570 GO:0042803 GO:0005773 GO:0046686 GO:0005634 GO:0005886 GO:0016126 GO:0048046																																											
comp38571_c0_seq1 GO:0010026 GO:0031507 GO:0009933 GO:0000724 GO:0009555 GO:0005515 GO:0000166 GO:0048366 GO:0006334 GO:0008283 GO:0005678																																																												
comp38574_c0_seq1 GO:0042742 GO:0008287 GO:0046872 GO:0004722 GO:0005886 GO:0006470 GO:0005739 GO:0044419																																																															
comp38576_c0_seq1 GO:0016747																																																																						
comp38578_c0_seq1 GO:0016491 GO:0005488																																																																					
comp38595_c1_seq1 GO:0003700 GO:0043565 GO:0006355																																																																				
comp38601_c0_seq1 GO:0003677 GO:0000166																																																																					
comp38613_c0_seq1 GO:0080008 GO:0005515 GO:0000166 GO:0005634																																																																			
comp38676_c0_seq1 GO:0048767 GO:0044272 GO:0009108 GO:0009793 GO:0008652 GO:0009695 GO:0000271 GO:0043481 GO:0009825 GO:0016117 GO:0010114 GO:0010155 GO:0048481 GO:0005215 GO:0005783 GO:0009072 GO:0006200 GO:0006364 GO:0010817 GO:0010025 GO:0009644 GO:0042742 GO:0010027 GO:0009744 GO:0006636 GO:0010224 GO:0010218 GO:0009637 GO:0005886 GO:0016226 GO:0010228 GO:0005524 GO:0006766 GO:0016887 GO:0006733 GO:0000096 GO:0009106 GO:0009932 GO:0009409 GO:0019216 GO:0042335 GO:0015995 GO:0005634 GO:0009718 GO:0008033 GO:0019288 GO:0000038 GO:0006546 GO:0071555																						
comp38684_c0_seq1 GO:0016702 GO:0016706 GO:0055114																																																																				
comp38708_c1_seq2 GO:0005634 GO:0009941																																																																					
comp38709_c0_seq1 GO:0006661 GO:0009507																																																																					
comp38713_c1_seq1 GO:0009648 GO:0048518 GO:0006355 GO:0009909 GO:0005515 GO:0010033																																																																	
comp38723_c0_seq1 GO:0008152 GO:0035251																																																																					
comp38725_c0_seq1 GO:0010584 GO:0032259 GO:0008168																																																																				
comp38726_c0_seq1 GO:0005739																																																																						
comp38729_c0_seq1 GO:0042409 GO:0032259																																																																					
comp38746_c0_seq1 GO:0060453 GO:0042127 GO:0015459 GO:0032411 GO:0016020 GO:0042981 GO:0000166 GO:0043231 GO:0001558 GO:0017080 GO:0030334 GO:0070294 GO:0004672 GO:0007616 GO:0051090 GO:0006468 GO:0050790 GO:0017081 GO:0006950 GO:0044444 GO:0008217 GO:0005246																																																	
comp38750_c0_seq1 GO:0005230 GO:0006810 GO:0016020																																																																				
comp38753_c0_seq1 GO:0006457 GO:0000413 GO:0042277 GO:0005737 GO:0003755																																																																		
comp38762_c0_seq1 GO:0045543 GO:0055114 GO:0032940 GO:0016702 GO:0016023 GO:0016707 GO:0009686 GO:0005506																																																															
comp38778_c0_seq2 GO:0009055 GO:0045454 GO:0006662 GO:0009570 GO:0009534 GO:0015035																																																																	
comp38789_c0_seq1 GO:0005978 GO:0004373																																																																					
comp38796_c0_seq1 GO:0005507 GO:0048038 GO:0009507 GO:0009308																																																																			
comp38810_c0_seq1 GO:0008270																																																																						
comp38815_c1_seq1 GO:0008233 GO:0006465 GO:0005787																																																																				
comp38822_c0_seq1 GO:0008113 GO:0005634 GO:0055114																																																																				
comp38847_c0_seq1 GO:0006107 GO:0015908 GO:0006533 GO:0043234 GO:0019551 GO:0006532 GO:0004069 GO:0005743 GO:0045471 GO:0005543 GO:0080130 GO:0009986 GO:0034641 GO:0019899 GO:0019550 GO:0019470 GO:0016212 GO:0006094 GO:0005759 GO:0016597 GO:0042803 GO:0030170 GO:0005886 GO:0043204																																															
comp38852_c0_seq1 GO:0051645 GO:0007267 GO:0060151 GO:0030048 GO:0051646 GO:0005509 GO:0005743 GO:0051510 GO:0006511 GO:0005819 GO:0015867 GO:0031461 GO:0004842 GO:0031625 GO:0051302 GO:0032875 GO:0007276 GO:0035196 GO:0055085 GO:0010267 GO:0009561 GO:0005634 GO:0009616																																																
comp38854_c0_seq1 GO:0016787																																																																						
comp38862_c0_seq1 GO:0009108 GO:0009695 GO:0009697 GO:0010114 GO:0010363 GO:0010200 GO:0009749 GO:0019344 GO:0031348 GO:0009072 GO:0050832 GO:0009867 GO:0009772 GO:0006364 GO:0009941 GO:0009595 GO:0042742 GO:0006612 GO:0010027 GO:0009117 GO:0009744 GO:0006636 GO:0002831 GO:0010310 GO:0010218 GO:0009637 GO:0005515 GO:0009862 GO:0006766 GO:0009773 GO:0019748 GO:0006733 GO:0009106 GO:0035304 GO:0009409 GO:0009902 GO:0019216 GO:0015995 GO:0000165 GO:0010207 GO:0009535 GO:0043900 GO:0019288 GO:0006546																											
comp38869_c0_seq1 GO:0005576 GO:0005886																																																																					
comp38873_c0_seq1 GO:0030001 GO:0016020 GO:0046873 GO:0055085																																																																			
comp38897_c0_seq1 GO:0001510 GO:0006412 GO:0005618 GO:0005730 GO:0009506 GO:0003735 GO:0022627 GO:0005773 GO:0016020																																																														
comp38899_c0_seq1 GO:0030529																																																																						
comp38910_c0_seq2 GO:0005887 GO:0006833 GO:0051119 GO:0008643 GO:0009750 GO:0009651																																																																	
comp38925_c0_seq1 GO:0097159 GO:1901363																																																																					
comp38926_c0_seq1 GO:0007311 GO:0050708 GO:0070613 GO:0009951 GO:0005783																																																																		
comp38944_c0_seq1 GO:0005811 GO:2000427 GO:0003756 GO:0005783																																																																			
comp38950_c0_seq1 GO:0006511 GO:0016021 GO:0030244 GO:0051788 GO:0080129 GO:0048193 GO:0009853 GO:0005783 GO:0005886																																																														
comp38975_c0_seq1 GO:0006626 GO:0006625 GO:0005777 GO:0009507 GO:0005739																																																																		
comp38978_c0_seq1 GO:0006355 GO:0046983 GO:0009734 GO:0005634																																																																			
comp38986_c0_seq1 GO:0016310 GO:0005524 GO:0006096 GO:0004396																																																																			
comp38986_c2_seq1 GO:0005975 GO:0044237 GO:0016772 GO:0000166																																																																			
comp39004_c0_seq1 GO:0005391 GO:0016021 GO:0046872 GO:0015672 GO:0006754 GO:0005524																																																																	
comp39017_c0_seq1 GO:0005622 GO:0007165																																																																					
comp39033_c0_seq1 GO:0003676 GO:0000166																																																																					
comp39073_c1_seq1 GO:0006413 GO:0003743																																																																					
comp39079_c0_seq1 GO:0009504 GO:0005739 GO:0009506 GO:0042732 GO:0006184 GO:0005938 GO:0010152 GO:0003924 GO:0000266 GO:0005525 GO:0005886																																																												
comp39094_c0_seq2 GO:0000280 GO:0048193 GO:0016023 GO:0045454 GO:0030244 GO:0016853 GO:0009507 GO:0007000																																																															
comp39105_c0_seq1 GO:0042267 GO:0045298 GO:0030705 GO:0044297 GO:0005641 GO:0005525 GO:0051301 GO:0042288 GO:0006184 GO:0051225 GO:0005829 GO:0005874 GO:0051258 GO:0007067 GO:0051082 GO:0042277 GO:0032403 GO:0003924 GO:0007018 GO:0051084 GO:0000086 GO:0005200 GO:0030182																																																
comp39105_c1_seq1 GO:0005874 GO:0051258 GO:0006184 GO:0007018 GO:0003924 GO:0005198 GO:0005737 GO:0005525																																																															
comp39106_c0_seq1 GO:0005981 GO:0030512 GO:0019901 GO:0017018 GO:0030155 GO:0051301 GO:0000164 GO:0050115 GO:0019433 GO:0005730 GO:0005829 GO:0046872 GO:0072357 GO:0005979 GO:0044281 GO:0070688 GO:0006470 GO:0001889 GO:0007049 GO:0042587																																																			
comp39125_c0_seq1 GO:0005840 GO:0003735 GO:0006412 GO:0019843																																																																			
comp39139_c0_seq1 GO:0005840 GO:0003735 GO:0006412																																																																				
comp39147_c0_seq1 GO:0005488 GO:0016491 GO:0043231 GO:0016020																																																																			
comp39158_c0_seq1 GO:0044444 GO:0043231																																																																					
comp39160_c1_seq1 GO:0016760																																																																						
comp39214_c0_seq1 GO:0016740																																																																						
comp39224_c0_seq1 GO:0006355 GO:0003677 GO:0010382 GO:0010089 GO:0003700 GO:0007275 GO:0005634																																																																
comp39235_c1_seq1 GO:0006979 GO:0044249 GO:0044238 GO:0003676 GO:0046483 GO:0034641 GO:1901360 GO:0050794 GO:0006725 GO:0005886																																																													
comp39266_c0_seq1 GO:0016787																																																																						
comp39278_c0_seq1 GO:0005875 GO:0003735 GO:0005811 GO:0006464 GO:0006511 GO:0022625 GO:0006412																																																																
comp39279_c0_seq1 GO:0005739																																																																						
comp39280_c0_seq1 GO:0051567 GO:0003677 GO:0006346 GO:0090116 GO:0003886																																																																		
comp39300_c0_seq1 GO:0005576 GO:0008152 GO:0008238																																																																				
comp39301_c0_seq1 GO:0016020																																																																						
comp39315_c0_seq1 GO:0005488																																																																						
comp39322_c0_seq1 GO:0005515																																																																						
comp39342_c0_seq1 GO:0016905 GO:0016310 GO:0009536																																																																				
comp39343_c0_seq1 GO:0005634 GO:0005829																																																																					
comp39345_c0_seq1 GO:0009607 GO:0006952																																																																					
comp39350_c0_seq1 GO:0016021 GO:0005886																																																																					
comp39354_c0_seq1 GO:0003676 GO:0005524 GO:0004386 GO:0030422 GO:0006306																																																																		
comp39361_c1_seq1 GO:0016168 GO:0030076 GO:0016021 GO:0006354 GO:0009635 GO:0009772 GO:0016491 GO:0005515 GO:0009535 GO:0009523 GO:0010287 GO:0010207 GO:0005506 GO:0045156																																																									
comp39387_c0_seq1 GO:0044267 GO:0015450 GO:0005742 GO:0006626 GO:0005515																																																																		
comp39407_c0_seq1 GO:0009908 GO:0051788 GO:0009941 GO:0006635 GO:0043161 GO:0051604 GO:0009407 GO:0048825 GO:0080129 GO:0051510 GO:0048767 GO:0005829 GO:0031540 GO:0008541 GO:0042023 GO:0009647 GO:0009408 GO:0048366 GO:0008233 GO:0048528 GO:0009735 GO:0005634 GO:0009733																																																
comp39408_c0_seq1 GO:0008479 GO:0008616																																																																					
comp39433_c0_seq1 GO:0000786 GO:0003677 GO:0006334 GO:0005634																																																																			
comp39437_c0_seq2 GO:0016020 GO:0008168 GO:0032259																																																																				
comp39439_c0_seq1 GO:0005515 GO:0051861 GO:0007283 GO:0070194 GO:0007141 GO:0031662 GO:0036128 GO:0031101 GO:0009986 GO:0000795 GO:0001673 GO:0030154 GO:0009408 GO:0005524 GO:0005739																																																								
comp39453_c0_seq1 GO:0006260 GO:0003677 GO:0005664																																																																				
comp39469_c0_seq1 GO:0005739 GO:0009507																																																																					
comp39471_c0_seq1 GO:0031982 GO:0043231 GO:0044444 GO:0016020																																																																			
comp39495_c0_seq2 GO:0031408 GO:0005506 GO:0016165 GO:0055114																																																																			
comp39498_c0_seq1 GO:0003723																																																																						
comp39510_c0_seq1 GO:0005753 GO:0006511 GO:0051788 GO:0009536 GO:0080129 GO:0009060 GO:0006096 GO:0009853 GO:0046686																																																														
comp39532_c0_seq1 GO:0005886 GO:0005774 GO:0042631 GO:0009737 GO:0009631 GO:0005739																																																																	
comp39544_c0_seq1 GO:0005737 GO:0005509																																																																					
comp39553_c1_seq1 GO:0005484 GO:0009506 GO:0005886 GO:0008565 GO:0016021 GO:0005634 GO:0005783 GO:0006612																																																															
comp39573_c0_seq1 GO:0016887 GO:0006200 GO:0005524																																																																				
comp39578_c0_seq2 GO:0016787																																																																						
comp39594_c0_seq1 GO:0006351 GO:0016491 GO:1901363 GO:0097159																																																																			
comp39602_c0_seq1 GO:0042176 GO:0007253 GO:0043161 GO:0019901 GO:0045859 GO:0031265 GO:0043130 GO:0005829 GO:0031072 GO:0031625 GO:0031334 GO:0043065 GO:0034098 GO:0019887 GO:0051059 GO:0048471 GO:0005634																																																						
comp39616_c0_seq1 GO:0009695 GO:0009753 GO:0035556 GO:0030968 GO:0009611 GO:0010200 GO:0009738 GO:0009620																																																															
comp39623_c0_seq1 GO:0008152 GO:0008080 GO:0005634 GO:0009536																																																																			
comp39629_c0_seq3 GO:0009306 GO:0015450 GO:0016021 GO:0006354 GO:0010027 GO:0005515 GO:0009535																																																																
comp39664_c0_seq1 GO:0016020 GO:0005811																																																																					
comp39672_c0_seq1 GO:0003939 GO:0000166 GO:0055114 GO:0008270																																																																			
comp39683_c0_seq1 GO:0030532 GO:0045495 GO:0015030 GO:0003676 GO:0071011 GO:0000398 GO:0007052 GO:0007281 GO:0071013 GO:0008406																																																													
comp39687_c0_seq1 GO:0046872 GO:0045039 GO:0005743 GO:0042719																																																																			
comp39690_c1_seq1 GO:0005739																																																																						
comp39700_c0_seq1 GO:0004360 GO:0016051 GO:0005737 GO:0030246																																																																			
comp39710_c2_seq1 GO:0008234 GO:0006508																																																																					
comp39719_c0_seq1 GO:0009987 GO:0007275 GO:0016043																																																																				
comp39725_c0_seq1 GO:0009639 GO:0005634 GO:0008270																																																																				
comp39727_c0_seq1 GO:0005829 GO:0004871 GO:0006915 GO:0005615 GO:0000166 GO:0007165 GO:0005153 GO:0006418 GO:0004831 GO:0005634																																																													
comp39733_c1_seq1 GO:0004450 GO:0006102 GO:0055114																																																																				
comp39737_c0_seq1 GO:0045766 GO:0019899 GO:0008285 GO:0042981 GO:0045603 GO:0005737 GO:0005634																																																																
comp39741_c0_seq1 GO:0005634 GO:0005739																																																																					
comp39756_c0_seq1 GO:0043170 GO:0044238																																																																					
comp39780_c0_seq1 GO:0005852 GO:0006446 GO:0003743 GO:0005634 GO:0043022																																																																		
comp39786_c0_seq1 GO:0046872 GO:0055114 GO:0016702																																																																				
comp39829_c0_seq4 GO:0006355 GO:0003677 GO:0048441 GO:2000488 GO:0048443 GO:0003700 GO:0005634																																																																
comp39832_c0_seq1 GO:0005737 GO:0010286																																																																					
comp39854_c0_seq1 GO:0033160 GO:0032092 GO:0002135 GO:0006457 GO:0016234 GO:0019901 GO:0031526 GO:0016323 GO:0005525 GO:0001890 GO:0005829 GO:0002134 GO:0009986 GO:0032564 GO:0045793 GO:0051082 GO:0017098 GO:0071902 GO:0006950 GO:0043524 GO:0044325 GO:0005524 GO:0016324 GO:0005739																																															
comp39858_c0_seq1 GO:0005739 GO:0009507																																																																					
comp39860_c0_seq1 GO:0046872 GO:0016491 GO:0070469 GO:0009055 GO:0016021 GO:0022904 GO:0005739																																																																
comp39872_c0_seq1 GO:0005576 GO:0016023																																																																					
comp39892_c0_seq1 GO:0005774 GO:0048046 GO:0016126 GO:0008270 GO:0030003 GO:0009651 GO:0006333 GO:0005509 GO:0005618 GO:0005829 GO:0007030 GO:0004601 GO:0009570 GO:0071435 GO:0005544 GO:0009579 GO:0046686 GO:0009409 GO:0019344 GO:0009408 GO:0009737 GO:0009506 GO:0070588 GO:0042803 GO:0005886 GO:0005507 GO:0005634 GO:0005524 GO:0006979 GO:0009269 GO:0005739																																								
comp39900_c0_seq1 GO:0005975 GO:0004553 GO:0043169																																																																				
comp39927_c0_seq1 GO:0008017 GO:0051322 GO:0055028 GO:0009506 GO:0046785 GO:0009574 GO:0005819 GO:0009524																																																															
comp39928_c0_seq1 GO:0005488																																																																						
comp39929_c0_seq1 GO:0016021 GO:0007283																																																																					
comp39942_c0_seq1 GO:0005886																																																																						
comp39947_c0_seq2 GO:0030746 GO:0046983 GO:0008171 GO:0032259 GO:0009701																																																																		
comp39949_c0_seq1 GO:0016363 GO:0003723 GO:0006511 GO:0005739 GO:0004298 GO:0051059 GO:0019773 GO:0005844 GO:0051092																																																														
comp39962_c1_seq1 GO:0005829 GO:0005507 GO:0003746 GO:0005730 GO:0009409 GO:0006414 GO:0009507 GO:0005525 GO:0005886																																																														
comp39967_c0_seq1 GO:0047220 GO:0016021 GO:0009536 GO:0010584 GO:0006486 GO:0005794																																																																	
comp39980_c0_seq1 GO:0030775 GO:0005794 GO:0045492 GO:0009808 GO:0005576 GO:0010413 GO:0005739																																																																
comp39984_c0_seq1 GO:0005576 GO:0005783 GO:0006333																																																																				
comp39985_c0_seq2 GO:0016023 GO:0006468 GO:0005524 GO:0004674																																																																			
comp39986_c0_seq2 GO:0000085 GO:0010048 GO:0050826 GO:0005515 GO:0009793 GO:0006406 GO:0016579 GO:0016571 GO:0010388 GO:0009640 GO:0019915 GO:0010182 GO:0009933 GO:0005635 GO:0016567 GO:0009845 GO:0010074 GO:0010228 GO:0045893 GO:0009909 GO:0010162																																																		
comp39987_c0_seq1 GO:0010025 GO:0016747 GO:0044272 GO:0009535 GO:0042761 GO:0005783 GO:0005634																																																																
comp39991_c0_seq2 GO:0009733																																																																						
comp40003_c0_seq1 GO:0005737 GO:0009627 GO:0045486 GO:0019748 GO:0005506 GO:0009697 GO:0055114																																																																
comp40004_c0_seq2 GO:0005524 GO:0017111 GO:0009507 GO:0005739																																																																			
comp40030_c0_seq1 GO:0008152 GO:0005737 GO:0004364																																																																				
comp40031_c0_seq1 GO:0016310 GO:0003872 GO:0005945 GO:0006096 GO:0009536																																																																		
comp40036_c0_seq1 GO:0005737 GO:0046836 GO:0010175 GO:0051861 GO:0005515 GO:0009751 GO:0016192 GO:0017089 GO:0008219 GO:0009816																																																													
comp40043_c0_seq1 GO:0009987																																																																						
comp40050_c0_seq1 GO:0005576 GO:0009664 GO:0016020																																																																				
comp40063_c0_seq1 GO:0005834 GO:0048188 GO:0010228 GO:0000166																																																																			
comp40064_c0_seq1 GO:0004672																																																																						
comp40068_c0_seq2 GO:0003735 GO:0015934 GO:0006412																																																																				
comp40074_c0_seq1 GO:0009941 GO:0009793 GO:0008568 GO:0004222 GO:0009506 GO:0006508 GO:0009987 GO:0005886 GO:0005524																																																														
comp40075_c0_seq2 GO:0009941 GO:0009793 GO:0005739																																																																				
comp40080_c1_seq1 GO:0030054 GO:0005618 GO:0030244 GO:0008466 GO:0007047																																																																		
comp40081_c0_seq2 GO:0003899 GO:0008270 GO:0006355 GO:0006354 GO:0003677 GO:0003700 GO:0005737 GO:0005634																																																															
comp40087_c0_seq1 GO:0003700 GO:0000976 GO:0005634 GO:0006355																																																																			
comp40089_c0_seq1 GO:0005743 GO:0055114 GO:0004129																																																																				
comp40090_c0_seq1 GO:0009825 GO:0006412 GO:0005885 GO:0007015 GO:0010090 GO:0009165 GO:0003735 GO:0005524 GO:0052546 GO:0005200 GO:0022625 GO:0016020 GO:0052541																																																										
comp40103_c1_seq2 GO:0048449 GO:0048438																																																																					
comp40104_c0_seq1 GO:0005634																																																																						
comp40108_c0_seq1 GO:0003677 GO:0006355																																																																					
comp40112_c0_seq1 GO:0016023 GO:0009627 GO:0034976																																																																				
comp40113_c0_seq1 GO:0016023 GO:0009507																																																																					
comp40115_c0_seq1 GO:0005515																																																																						
comp40118_c0_seq2 GO:0005737 GO:0003724 GO:0003677 GO:0004003 GO:0005524 GO:0009616																																																																	
comp40133_c0_seq1 GO:0008152																																																																						
comp40137_c0_seq1 GO:0043234 GO:0051258 GO:0006184 GO:0003924 GO:0009507 GO:0005773 GO:0005525																																																																
comp40145_c0_seq1 GO:0016491																																																																						
comp40147_c0_seq1 GO:0008198 GO:0006725 GO:0016702 GO:0055114 GO:0008270																																																																		
comp40151_c0_seq1 GO:0005739 GO:0016020																																																																					
comp40160_c0_seq1 GO:0005852 GO:0006413 GO:0035071 GO:0003743																																																																			
comp40173_c0_seq2 GO:0006467 GO:0009055 GO:0045454 GO:0006662 GO:0003756 GO:0005829 GO:0015035																																																																
comp40193_c0_seq1 GO:0008152 GO:0016787																																																																					
comp40197_c0_seq1 GO:0019761 GO:0016117 GO:0046777 GO:0009536 GO:0005739																																																																		
comp40203_c0_seq1 GO:0008536 GO:0016558 GO:0006606 GO:0006891 GO:0006869 GO:0010351 GO:0005635 GO:0005737																																																															
comp40211_c0_seq1 GO:0009733 GO:0005634																																																																					
comp40232_c0_seq1 GO:0008340 GO:0046961 GO:0046331 GO:0008553 GO:0046933 GO:0005764 GO:0016021 GO:0015986 GO:0071486 GO:0000275 GO:0006979																																																												
comp40234_c0_seq2 GO:0071704 GO:0043231 GO:0020037 GO:0009055 GO:0016021 GO:0050896 GO:0016705 GO:0004497 GO:0005506 GO:0055114 GO:0044249																																																												
comp40241_c0_seq1 GO:0009627 GO:0046658 GO:0034976 GO:0009506 GO:0008061																																																																		
comp40242_c0_seq3 GO:0046029 GO:0000166 GO:0055114 GO:0008270																																																																			
comp40247_c0_seq2 GO:0003824																																																																						
comp40251_c0_seq2 GO:0009507																																																																						
comp40265_c0_seq2 GO:0005622 GO:0005515 GO:0008408																																																																				
comp40267_c0_seq1 GO:0050162 GO:0048046 GO:0004784 GO:0045735 GO:0030145 GO:0055114																																																																	
comp40269_c0_seq1 GO:0006457 GO:0009644 GO:0042542 GO:0005782 GO:0009408 GO:0005739																																																																	
comp40278_c0_seq1 GO:0008667 GO:0005507 GO:0030283 GO:0005737 GO:0055114 GO:0000166																																																																	
comp40282_c0_seq1 GO:0006312 GO:0007131 GO:0045132 GO:0009410 GO:0000724 GO:0042138 GO:0009560 GO:0051026 GO:0008284 GO:0006396 GO:0016444 GO:0003677 GO:0007140 GO:0004519 GO:0000794 GO:0045893 GO:0043687 GO:0007062																																																					
comp40284_c0_seq1 GO:0003864 GO:0050897 GO:0015940 GO:0032259 GO:0009507 GO:0008270 GO:0008168 GO:0005739																																																															
comp40296_c0_seq1 GO:0016301 GO:0016310 GO:0005634 GO:0005515																																																																			
comp40311_c0_seq1 GO:0016556 GO:0000413 GO:0006457 GO:0019288 GO:0003755 GO:0009543																																																																	
comp40312_c0_seq1 GO:0005737 GO:0008168 GO:0032259																																																																				
comp40321_c0_seq1 GO:0003700 GO:0003677 GO:0005667 GO:0006355																																																																			
comp40322_c0_seq1 GO:0050896 GO:0017148 GO:0006355 GO:0043565 GO:0046983 GO:0003700																																																																	
comp40325_c0_seq1 GO:0015770 GO:0071310 GO:0016023 GO:0005887 GO:0008515																																																																		
comp40327_c0_seq1 GO:0003677 GO:0006355																																																																					
comp40345_c0_seq1 GO:0005737																																																																						
comp40346_c0_seq1 GO:0005741 GO:0004364 GO:0005811																																																																				
comp40358_c0_seq1 GO:0019243 GO:0006869 GO:0005524 GO:0009706 GO:0016310 GO:0016301 GO:0005319 GO:0009707																																																															
comp40361_c0_seq1 GO:0005730 GO:0005886 GO:0022627 GO:0009507																																																																			
comp40379_c0_seq1 GO:0009725 GO:0006952 GO:0016788 GO:0051707																																																																			
comp40382_c0_seq1 GO:0000502																																																																						
comp40387_c0_seq1 GO:0045735																																																																						
comp40388_c0_seq1 GO:0005576 GO:0016023 GO:0005773																																																																				
comp40395_c0_seq1 GO:0046872																																																																						
comp40398_c0_seq1 GO:0009751 GO:0003677 GO:0010018 GO:0005515 GO:0045893 GO:0005634																																																																	
comp40401_c0_seq1 GO:0009987 GO:0050789 GO:0019915																																																																				
comp40406_c0_seq1 GO:0016787 GO:0006911																																																																					
comp40409_c0_seq1 GO:0003735 GO:0005886 GO:0005618 GO:0022625 GO:0009507 GO:0006412																																																																	
comp40414_c0_seq1 GO:0046658 GO:0009506 GO:0009505 GO:0005794																																																																			
comp40415_c0_seq1 GO:0004013 GO:0005737 GO:0006730																																																																				
comp40417_c0_seq1 GO:0016020																																																																						
comp40420_c0_seq1 GO:0003677 GO:0008270 GO:0006355																																																																				
comp40424_c0_seq2 GO:0006333 GO:0000398 GO:0001510 GO:0005634																																																																			
comp40426_c0_seq1 GO:0005774 GO:0004871 GO:0000139 GO:0005525 GO:0015031 GO:0006184 GO:0016192 GO:0007264 GO:0046686 GO:0006661 GO:0048471 GO:0003924 GO:0005886 GO:0005507 GO:0006471																																																								
comp40433_c0_seq1 GO:0009987																																																																						
comp40434_c0_seq1 GO:0009987																																																																						
comp40442_c1_seq2 GO:0047983 GO:0006750 GO:0004363 GO:0005524 GO:0000287 GO:0043295 GO:0042803 GO:0009507																																																															
comp40461_c0_seq1 GO:0005634																																																																						
comp40463_c0_seq2 GO:0001510 GO:0005730 GO:0003677 GO:0005694 GO:0008283																																																																		
comp40468_c0_seq1 GO:0009506 GO:0046907 GO:0005783 GO:0005515 GO:0010496																																																																		
comp40470_c0_seq1 GO:0006511 GO:0055114 GO:0005747 GO:0009651 GO:0051788 GO:0080129 GO:0000166 GO:0003954 GO:0050662 GO:0009853																																																													
comp40471_c0_seq1 GO:0031625 GO:0005886 GO:0046777 GO:0005524 GO:0004674																																																																		
comp40472_c0_seq2 GO:0005576 GO:0008083 GO:0008283																																																																				
comp40474_c0_seq1 GO:0006457 GO:0031072 GO:0005524 GO:0051082 GO:0016020 GO:0008270 GO:0009408 GO:0005739																																																															
comp40483_c0_seq1 GO:0005739 GO:0009507																																																																					
comp40485_c0_seq1 GO:0005759																																																																						
comp40489_c0_seq1 GO:0017118 GO:0019243 GO:0006464 GO:0009507																																																																			
comp40500_c0_seq1 GO:0009505 GO:0016023 GO:0005886 GO:0005774 GO:0006486 GO:0016021 GO:0004579 GO:0005783																																																															
comp40503_c0_seq1 GO:0005840 GO:0003735 GO:0006414																																																																				
comp40525_c0_seq1 GO:0005576 GO:0016023																																																																					
comp40526_c0_seq1 GO:0005739 GO:0009507																																																																					
comp40530_c0_seq1 GO:0005739																																																																						
comp40538_c1_seq1 GO:0009056 GO:0004553 GO:0005975																																																																				
comp40539_c0_seq1 GO:0002576 GO:0005794 GO:0005515 GO:0042470 GO:0005509 GO:0033018 GO:0005576 GO:0030168																																																															
comp40540_c0_seq1 GO:0005840 GO:0003735 GO:0006412																																																																				
comp40545_c0_seq1 GO:0010227																																																																						
comp40551_c0_seq1 GO:0009733 GO:0005634 GO:0005516																																																																				
comp40556_c0_seq1 GO:0017110 GO:0017111																																																																					
comp40561_c0_seq1 GO:0009651 GO:0048046 GO:0005618 GO:0004784 GO:0045735 GO:0030145 GO:0055114 GO:0031012																																																															
comp40562_c0_seq1 GO:0031072 GO:0006457 GO:0010286 GO:0009506 GO:0016491 GO:0016023 GO:0005788 GO:0009860 GO:0051082 GO:0009688 GO:0034605 GO:0009644 GO:0042542																																																										
comp40572_c0_seq1 GO:0030599 GO:0042545 GO:0009505 GO:0030048 GO:0045330																																																																		
comp40576_c0_seq1 GO:0051287 GO:0005886 GO:0048038 GO:0006810 GO:0050136 GO:0019684 GO:0009535 GO:0055114																																																															
comp40576_c1_seq1 GO:0005840 GO:0003735 GO:0009507 GO:0006412																																																																			
comp40578_c0_seq2 GO:0005737 GO:0006623 GO:0003723 GO:0006139 GO:0008408 GO:0016192																																																																	
comp40581_c0_seq1 GO:0006355 GO:0003677 GO:0048481 GO:0046983 GO:0003700 GO:0005634																																																																	
comp40608_c0_seq4 GO:0016020																																																																						
comp40621_c0_seq1 GO:0031348 GO:0008752 GO:0006635 GO:0008270 GO:0009867 GO:0009697 GO:0006833 GO:0009862 GO:0010363 GO:0010310 GO:0016045 GO:0010200 GO:0009651 GO:0015706 GO:0043900 GO:0006612 GO:0050832 GO:0042742 GO:0006972 GO:0005777 GO:0005829 GO:0002831 GO:0007030 GO:0006096 GO:0000165 GO:0009570 GO:0010167 GO:0046686 GO:0009266 GO:0005886 GO:0006979 GO:0005739																																							
comp40623_c0_seq2 GO:0005737																																																																						
comp40633_c0_seq1 GO:0016559 GO:0005779 GO:0006098 GO:0042802																																																																			
comp40643_c0_seq1 GO:0009749 GO:0055114 GO:0009744 GO:0034976 GO:0009750 GO:0005739 GO:0004656 GO:0043090 GO:0002679 GO:0009627 GO:0005768 GO:0031418 GO:0080147 GO:0010200 GO:0018401 GO:0005802 GO:0006888 GO:0005506 GO:0005794 GO:0005783																																																			
comp40644_c0_seq1 GO:0005840 GO:0042254																																																																					
comp40650_c0_seq1 GO:0016757 GO:0009058																																																																					
comp40654_c0_seq1 GO:0008327 GO:0004797 GO:0005524 GO:0009507 GO:0005634 GO:0008270 GO:0051747																																																																
comp40658_c0_seq1 GO:0005488																																																																						
comp40663_c0_seq1 GO:0005524 GO:0006950																																																																					
comp40665_c0_seq1 GO:0005730 GO:0015030 GO:0003676 GO:0010197 GO:0030529 GO:0009536																																																																	
comp40666_c0_seq1 GO:0005829 GO:0008270 GO:0005739 GO:0004817 GO:0006423 GO:0010197 GO:0009658 GO:0048481 GO:0005524 GO:0043067 GO:0009570 GO:0046686 GO:0042407																																																										
comp40684_c0_seq1 GO:0012505 GO:0010118 GO:0006820 GO:0008509 GO:0009507																																																																		
comp40689_c0_seq1 GO:0009789 GO:0009845 GO:0005739 GO:0009941 GO:0030136 GO:0010119 GO:0005546 GO:0008152 GO:0003824 GO:0046686 GO:0005634 GO:0005886																																																											
comp40693_c0_seq1 GO:0005829 GO:0003676 GO:0004824 GO:0009506 GO:0009165 GO:0009640 GO:0010388 GO:0005524 GO:0000287 GO:0000085 GO:0006430																																																												
comp40699_c0_seq1 GO:0005875 GO:0007291 GO:0006839 GO:0006820 GO:0007602 GO:0005741 GO:0030382 GO:0008308 GO:0016006 GO:0005811																																																													
comp40708_c0_seq1 GO:0005753 GO:0042777 GO:0046933 GO:0046914 GO:0005886																																																																		
comp40715_c0_seq1 GO:0004129																																																																						
comp40719_c0_seq1 GO:0005840 GO:0003735 GO:0006412																																																																				
comp40739_c0_seq1 GO:0006511 GO:0004221 GO:0005516 GO:0009506 GO:0009640 GO:0010388 GO:0004843 GO:0016567 GO:0000085 GO:0016579 GO:0045893 GO:0005634 GO:0016571																																																										
comp40752_c1_seq1 GO:0005730 GO:0003735 GO:0005618 GO:0022627 GO:0009507 GO:0016020 GO:0006412																																																																
comp40754_c0_seq1 GO:0016020																																																																						
comp40755_c0_seq1 GO:0005737																																																																						
comp40758_c0_seq1 GO:0006261 GO:0000811 GO:0009793																																																																				
comp40766_c0_seq1 GO:0030315 GO:0042277 GO:0031072 GO:0030132 GO:0005739 GO:0030130 GO:0031623 GO:0090307 GO:0030506 GO:0008022 GO:0042470 GO:0033572 GO:0007030 GO:0005819 GO:0006886 GO:0031523 GO:0005198																																																						
comp40766_c1_seq1 GO:0005622 GO:0016192 GO:0006886																																																																				
comp40778_c0_seq1 GO:0005739																																																																						
comp40784_c0_seq1 GO:0008380 GO:0016905 GO:0005634 GO:0080008 GO:0000166																																																																		
comp40787_c0_seq2 GO:0019222 GO:0004869 GO:0048046																																																																				
comp40789_c1_seq1 GO:0004767 GO:0006685																																																																					
comp40793_c0_seq1 GO:0080167 GO:0031347 GO:0009627																																																																				
comp40800_c0_seq1 GO:0050253 GO:0080031 GO:0004091 GO:0005737 GO:0080032 GO:0080030																																																																	
comp40807_c0_seq1 GO:0003700 GO:0005634 GO:0008270																																																																				
comp40808_c0_seq1 GO:0016787 GO:0005739 GO:0005634																																																																				
comp40810_c0_seq1 GO:0005840 GO:0003735 GO:0006412																																																																				
comp40811_c0_seq1 GO:0016740 GO:0006412																																																																					
comp40842_c0_seq1 GO:0045487 GO:0055114 GO:0052634 GO:0005506 GO:0016020																																																																		
comp40843_c0_seq3 GO:0010114 GO:0006355 GO:0003677 GO:0003700 GO:0009630 GO:0005634 GO:0009793																																																																
comp40844_c0_seq1 GO:0009684 GO:0004872 GO:0010427 GO:0006569 GO:0080163 GO:0009738 GO:0042803 GO:0019761 GO:0005634																																																														
comp40855_c0_seq1 GO:0000502 GO:0008270 GO:0006355 GO:0006281																																																																			
comp40859_c0_seq1 GO:0004721 GO:0005737 GO:0008152 GO:0005634																																																																			
comp40862_c0_seq1 GO:0004869 GO:0010466 GO:0016023																																																																				
comp40865_c0_seq1 GO:0003729 GO:0008334 GO:0006400 GO:0005634 GO:0000049																																																																		
comp40873_c0_seq1 GO:0004559 GO:0016023 GO:0030246 GO:0006013 GO:0008270 GO:0071944																																																																	
comp40875_c0_seq2 GO:0005737 GO:0010106 GO:0015706 GO:0010167 GO:0002238 GO:0006826																																																																	
comp40908_c0_seq1 GO:0009944 GO:0004871 GO:0009416 GO:0010075 GO:0010014 GO:0007165 GO:0009855 GO:0005886																																																															
comp40910_c0_seq1 GO:0015689 GO:0005773 GO:0012505 GO:0005886 GO:0015098 GO:0015116 GO:0009507 GO:0005739																																																															
comp40913_c0_seq2 GO:0009407 GO:0010583 GO:0004497 GO:0050832 GO:0005739 GO:0055114																																																																	
comp40920_c0_seq1 GO:0048765																																																																						
comp40922_c0_seq1 GO:0016772 GO:0005739 GO:0005886																																																																				
comp40927_c0_seq1 GO:0003824																																																																						
comp40930_c0_seq1 GO:0050896 GO:0016491 GO:0016310 GO:0004672 GO:0016020 GO:0000166																																																																	
comp40933_c0_seq1 GO:0001510 GO:0015450 GO:0005743 GO:0046872 GO:0045039 GO:0042719 GO:0009853 GO:0009793																																																															
comp40937_c1_seq1 GO:0006810																																																																						
comp40945_c0_seq1 GO:0006857 GO:0080054 GO:0080055 GO:0006863 GO:0010098 GO:0043562 GO:0019761 GO:0005886 GO:0009793																																																														
comp40947_c0_seq1 GO:0005739																																																																						
comp40952_c0_seq1 GO:0009705 GO:0009651 GO:0009624 GO:0042742 GO:0016021 GO:0009507 GO:0043069 GO:0046872 GO:0006754 GO:0055081 GO:0005388 GO:0070588 GO:0005886 GO:0005516 GO:0005524																																																								
comp40954_c0_seq4 GO:0009536																																																																						
comp40956_c0_seq1 GO:0009507																																																																						
comp40962_c0_seq1 GO:0005975 GO:0008810 GO:0005886																																																																				
comp40963_c0_seq1 GO:0016021 GO:0009624																																																																					
comp40965_c0_seq1 GO:0005840 GO:0003735 GO:0006412																																																																				
comp40968_c0_seq2 GO:0034968 GO:0016829 GO:0005739 GO:0009909 GO:0009220 GO:0016020																																																																	
comp40973_c1_seq1 GO:0022900 GO:0009055 GO:0004497 GO:0019375 GO:0016023 GO:0019825 GO:0042631 GO:0020037 GO:0010583 GO:0005576 GO:0009407 GO:0016036 GO:0000249 GO:0005506 GO:0019745 GO:0016126																																																							
comp40975_c0_seq1 GO:0005739 GO:0006661																																																																					
comp40976_c0_seq2 GO:0046872																																																																						
comp40984_c0_seq1 GO:0003676 GO:0000166 GO:0009536																																																																				
comp40989_c0_seq1 GO:0005737 GO:0019773 GO:0006511 GO:0005634 GO:0004298																																																																		
comp41001_c0_seq1 GO:0005960 GO:0006098 GO:0009853 GO:0009749 GO:0009744 GO:0009697 GO:0043085 GO:0010207 GO:0004375 GO:0042742 GO:0009507 GO:0009814 GO:0009579 GO:0009409 GO:0019344 GO:0009657 GO:0005634 GO:0006364 GO:0004047 GO:0019464 GO:0005739																																																		
comp41002_c0_seq1 GO:0006825 GO:0006626 GO:0016531 GO:0009617 GO:0005758 GO:0046688 GO:0009507																																																																
comp41003_c0_seq1 GO:0006623 GO:0010286 GO:0040007 GO:0006944 GO:0048193 GO:0009507 GO:0000578 GO:0009793 GO:0032509																																																														
comp41013_c0_seq1 GO:0060151 GO:0051646 GO:0030048 GO:0051645 GO:0005509 GO:0010286																																																																	
comp41028_c0_seq1 GO:0005774 GO:0046872 GO:0005739 GO:0009507 GO:0005886																																																																		
comp41029_c0_seq2 GO:0005249 GO:0006813 GO:0051260 GO:0008076 GO:0005515 GO:0005576 GO:0005773 GO:0005634																																																															
comp41030_c0_seq1 GO:0016798 GO:0008152																																																																					
comp41053_c0_seq1 GO:0046872 GO:0006979 GO:0020037 GO:0005618 GO:0004601 GO:0055114																																																																	
comp41073_c0_seq2 GO:0009835 GO:0015238 GO:0005886 GO:0006855 GO:0015297																																																																		
comp41082_c0_seq1 GO:0005488																																																																						
comp41083_c0_seq1 GO:0003676 GO:0009793 GO:0030529 GO:0005634																																																																			
comp41093_c0_seq1 GO:0006355 GO:0043565 GO:0003700																																																																				
comp41097_c0_seq1 GO:0016023																																																																						
comp41104_c0_seq1 GO:0006468 GO:0005524 GO:0004674																																																																				
comp41107_c0_seq1 GO:0008233																																																																						
comp41108_c0_seq1 GO:0016301 GO:0016310																																																																					
comp41111_c0_seq1 GO:0009825 GO:0000038 GO:0006655 GO:0042335 GO:0048767 GO:0000271 GO:0009932 GO:0010075 GO:0071555 GO:0009926 GO:0090447 GO:0010143 GO:0016791 GO:0008361 GO:0043481 GO:0003841 GO:0004366 GO:0009507 GO:0005783 GO:0007389																																																			
comp41112_c0_seq1 GO:0016787																																																																						
comp41114_c0_seq1 GO:0006952 GO:0051707 GO:0050789																																																																				
comp41119_c1_seq1 GO:0046872																																																																						
comp41120_c0_seq1 GO:0005739																																																																						
comp41120_c1_seq1 GO:0080156 GO:0005739																																																																					
comp41121_c0_seq1 GO:0009987 GO:0016043																																																																					
comp41134_c0_seq1 GO:0005840 GO:0003735 GO:0006412																																																																				
comp41143_c0_seq1 GO:0003746 GO:0006414 GO:0006184 GO:0003924 GO:0005525																																																																		
comp41143_c1_seq1 GO:0003746 GO:0004781 GO:0006414 GO:0006184 GO:0003924 GO:0005737 GO:0005525																																																																
comp41144_c1_seq1 GO:0016874 GO:0008152																																																																					
comp41147_c0_seq1 GO:0032440 GO:0000166 GO:0055114 GO:0008270																																																																			
comp41154_c0_seq1 GO:0046872																																																																						
comp41157_c1_seq1 GO:0005737 GO:0006413 GO:0003743																																																																				
comp41161_c0_seq1 GO:0005739																																																																						
comp41165_c0_seq2 GO:0010054 GO:0005794 GO:0032259 GO:0008168																																																																			
comp41167_c0_seq3 GO:0005737 GO:0009505 GO:0009409 GO:0000038 GO:0006952 GO:0005886 GO:0047504 GO:0042335 GO:0047501 GO:0055114 GO:0000166 GO:0080167																																																											
comp41170_c0_seq1 GO:0016132 GO:0008270 GO:0006084 GO:0009941 GO:0004801 GO:0005975 GO:0009570 GO:0019344 GO:0016126																																																														
comp41181_c0_seq1 GO:0005975 GO:0005794 GO:0009225 GO:0050662 GO:0016020 GO:0050378 GO:0000166																																																																
comp41186_c0_seq1 GO:0003677 GO:0046983 GO:0005634 GO:0006355																																																																			
comp41194_c0_seq1 GO:0048868 GO:0006662 GO:0003756 GO:0034976 GO:0045454 GO:0009553 GO:0009055 GO:0009505 GO:0005788 GO:0046686 GO:0009567 GO:0015035 GO:0005886 GO:0009793																																																									
comp41214_c0_seq1 GO:0006694 GO:0003854 GO:0047012 GO:0016853 GO:0016020 GO:0005783 GO:0055114 GO:0000166																																																															
comp41215_c0_seq1 GO:0016301 GO:0016310 GO:0008270																																																																				
comp41217_c0_seq1 GO:0006457 GO:0009644 GO:0034976 GO:0042542 GO:0005829 GO:0009408																																																																	
comp41223_c1_seq1 GO:0009555 GO:0048869																																																																					
comp41224_c0_seq1 GO:0009611 GO:0016787 GO:0009805 GO:0000041 GO:0005783 GO:0009963																																																																	
comp41227_c0_seq1 GO:0005576 GO:0004871 GO:0006949																																																																				
comp41239_c0_seq1 GO:0016021 GO:0005886																																																																					
comp41240_c0_seq1 GO:0010162 GO:0048827 GO:0009845 GO:0009933 GO:0009909 GO:0009640 GO:0010228 GO:0010229 GO:0016567 GO:0019915 GO:0050826 GO:0010182 GO:0005634 GO:0009793																																																									
comp41245_c0_seq1 GO:0005576 GO:0004806 GO:0005739 GO:0006629																																																																			
comp41246_c0_seq2 GO:0005576 GO:0030001 GO:0046872																																																																				
comp41264_c0_seq2 GO:0016020																																																																						
comp51900_c0_seq2 GO:0009507																																																																						
comp51901_c1_seq1 GO:0005829 GO:0009086 GO:0019915 GO:0000287 GO:0004427 GO:0006796 GO:0000394 GO:0016020 GO:0005634																																																														
comp51902_c1_seq2 GO:0016758																																																																						
comp51903_c0_seq6 GO:0016592 GO:0008380 GO:0070063 GO:0005829																																																																			
comp51905_c0_seq2 GO:0009506																																																																						
comp51906_c0_seq1 GO:0005829 GO:0004816 GO:0006421 GO:0003676 GO:0005739 GO:0005524 GO:0009507 GO:0046686 GO:0009793																																																														
comp51907_c0_seq1 GO:0006914 GO:0005634																																																																					
comp51908_c0_seq2 GO:0005634																																																																						
comp51909_c0_seq1 GO:0016051 GO:0016020 GO:0030158 GO:0008375 GO:0005794																																																																		
comp51913_c0_seq1 GO:0009536																																																																						
comp51915_c0_seq2 GO:0005634																																																																						
comp51916_c0_seq1 GO:0016020 GO:0016023 GO:0005773 GO:0009506 GO:0009505 GO:0003824																																																																	
comp51917_c0_seq1 GO:0015103 GO:0006828 GO:0042742 GO:0009506 GO:0015691 GO:0010039 GO:0015692 GO:0005384 GO:2000379 GO:0006879 GO:0005774 GO:0010043 GO:0009624 GO:0005794 GO:0005886																																																								
comp51919_c1_seq2 GO:0017069 GO:0000166 GO:0000398																																																																				
comp51921_c0_seq2 GO:0009753 GO:0009693 GO:0005777 GO:0009620 GO:0009611 GO:0009695 GO:0015824 GO:0009507 GO:0016787																																																														
comp51922_c1_seq2 GO:0042744 GO:0055114 GO:0034976 GO:0009651 GO:0009266 GO:0009627 GO:0006972 GO:0006833 GO:0007030 GO:0006096 GO:0016310 GO:0016301 GO:0007165 GO:0032440 GO:0046686 GO:0005886																																																							
comp51924_c0_seq2 GO:0004733 GO:0010181 GO:0042823 GO:0009536 GO:0055114 GO:0008615																																																																	
comp51925_c0_seq7 GO:0009753 GO:0055114 GO:0009694 GO:0006355 GO:0003677 GO:0003700 GO:0032440 GO:0005634																																																															
comp51927_c0_seq6 GO:0005739 GO:0009507																																																																					
comp51928_c0_seq1 GO:0006606 GO:0006406																																																																					
comp51929_c0_seq11 GO:0005737 GO:0048554 GO:0016151 GO:0005524 GO:0006807 GO:0016020																																																																	
comp51931_c0_seq1 GO:0046872 GO:0019430 GO:0042646 GO:0004784 GO:0009507 GO:0009579 GO:0055114																																																																
comp51932_c0_seq1 GO:0071281 GO:0009651 GO:0004478 GO:0006556 GO:0006730 GO:0005524 GO:0000287 GO:0005737																																																															
comp51933_c0_seq3 GO:0003676 GO:0005622																																																																					
comp51934_c0_seq1 GO:0045036 GO:0009793 GO:0019288 GO:0005525 GO:0009507 GO:0006184 GO:0016226 GO:0007264 GO:0070181 GO:0042274 GO:0045893 GO:0042793 GO:0003924 GO:0005886																																																									
comp51936_c0_seq1 GO:0006863 GO:0016021 GO:0015250 GO:0046715 GO:0035445																																																																		
comp51937_c0_seq1 GO:0042939 GO:0042936 GO:0005886 GO:0006807 GO:0042937 GO:0016021 GO:0009860 GO:0042938																																																															
comp51938_c0_seq1 GO:0044249 GO:0042991 GO:0005515 GO:0006139 GO:0048366																																																																		
comp51939_c0_seq1 GO:0006950																																																																						
comp51939_c1_seq1 GO:0005524 GO:0006950																																																																					
comp51940_c0_seq1 GO:0005829 GO:0032259 GO:0005634 GO:0008168																																																																			
comp51941_c0_seq17 GO:0018283 GO:0000302 GO:0008483 GO:0010039 GO:0001887 GO:0055072 GO:0031071 GO:0010269 GO:0009507 GO:0009000 GO:0030170 GO:0006534 GO:0009073																																																										
comp51942_c1_seq1 GO:0005739																																																																						
comp51943_c0_seq1 GO:0042409 GO:0005576 GO:0005829 GO:0005783 GO:0032259 GO:0008276																																																																	
comp51944_c0_seq32 GO:0010103 GO:0007155 GO:0009793 GO:0000166 GO:0045010 GO:0004672 GO:0010090 GO:0006468 GO:0048765 GO:0071555																																																													
comp51945_c1_seq1 GO:0046872 GO:0005622																																																																					
comp51945_c2_seq1 GO:0003723 GO:0016226 GO:0006364 GO:0010027 GO:0010228 GO:0048481 GO:0009507 GO:0045893 GO:0009793																																																														
comp51947_c0_seq8 GO:0080030 GO:0004091 GO:0008152 GO:0005634 GO:0050253 GO:0080031 GO:0080032 GO:0009860																																																															
comp51949_c0_seq3 GO:0003677																																																																						
comp51950_c1_seq1 GO:0005829 GO:0005634 GO:0009507																																																																				
comp51953_c0_seq4 GO:0005525 GO:0006777 GO:0005634																																																																				
comp51954_c0_seq7 GO:0017077 GO:0005743 GO:0005886 GO:0009853 GO:0005774 GO:0006839 GO:0015992 GO:0016021 GO:0009507																																																														
comp51955_c0_seq1 GO:0009733 GO:0005737 GO:0005886 GO:0010044																																																																			
comp51956_c0_seq3 GO:0005786 GO:0045900 GO:0008312 GO:0006614 GO:0005047																																																																		
comp51957_c1_seq2 GO:0005768 GO:0018401 GO:0005794 GO:0031418 GO:0005506 GO:0004656 GO:0005802 GO:0005739 GO:0055114																																																														
comp51958_c0_seq3 GO:0005634																																																																						
comp51960_c0_seq1 GO:0043447 GO:0010025 GO:0042335 GO:0055114 GO:0009414 GO:0016021 GO:0042742 GO:0046185 GO:0043668 GO:0010143 GO:0016491 GO:0071771 GO:0048653 GO:0050832 GO:0005506																																																								
comp51962_c0_seq3 GO:0010218 GO:0008270 GO:0006406 GO:0009740 GO:0010114 GO:0009585 GO:0010099 GO:0080167 GO:0051276 GO:0046983 GO:0031539 GO:0008284 GO:0010224 GO:0043565 GO:0010074 GO:0019722 GO:0003700 GO:0009737 GO:0003690 GO:0045893 GO:0042753 GO:0009909 GO:0043687 GO:0005634																																															
comp51963_c0_seq2 GO:0050896																																																																						
comp51964_c0_seq3 GO:0008152 GO:0052689																																																																					
comp51965_c0_seq2 GO:0005634																																																																						
comp51966_c0_seq2 GO:0004356 GO:0005524 GO:0006807 GO:0006542																																																																			
comp51967_c1_seq7 GO:0009653 GO:0045492 GO:0009793 GO:0009651 GO:0016926 GO:0009913 GO:0048468 GO:0016929 GO:0050665 GO:0010228 GO:0010413 GO:0016043 GO:0006508 GO:0005634																																																									
comp51968_c0_seq4 GO:0031072 GO:0006457 GO:0030968 GO:0048193 GO:0048527 GO:0051082 GO:0005794																																																																
comp51969_c0_seq1 GO:0004081 GO:0046872 GO:0006857 GO:0019243 GO:0009507 GO:0015967																																																																	
comp51970_c0_seq9 GO:0005739 GO:0008270 GO:0009507 GO:0004089 GO:0015976																																																																		
comp51972_c0_seq1 GO:0005829 GO:0008152 GO:0016747 GO:0008806 GO:0005739 GO:0009507 GO:0010043																																																																
comp51973_c0_seq6 GO:0009228 GO:0016310 GO:0008902 GO:0004789 GO:0000287 GO:0009570 GO:0008972																																																																
comp51974_c0_seq1 GO:0042939 GO:0016021 GO:0000325 GO:0016558 GO:0006891 GO:0006869 GO:0005774 GO:0015334 GO:0042937 GO:0015112 GO:0010351 GO:0042938 GO:0042936 GO:0005794 GO:0005886																																																								
comp51975_c0_seq1 GO:0006457 GO:0003676 GO:0051082 GO:0005737 GO:0000166 GO:0031072																																																																	
comp51976_c0_seq3 GO:0016021 GO:0005739 GO:0005778																																																																				
comp51977_c0_seq2 GO:0044464																																																																						
comp51978_c1_seq2 GO:0010075 GO:0010014 GO:0048438 GO:0009944 GO:0048439 GO:0005634 GO:0005739 GO:0009855																																																															
comp51979_c0_seq1 GO:0009414 GO:0007623 GO:0009409 GO:0006810 GO:0009737 GO:0009507 GO:0016020 GO:0005215																																																															
comp51980_c0_seq2 GO:0016020 GO:0010196 GO:0005739 GO:0009507																																																																			
comp51981_c0_seq1 GO:0071555 GO:0016788 GO:0005618 GO:0008152																																																																			
comp51983_c0_seq1 GO:0070401 GO:0009414 GO:0009409 GO:0008106 GO:0016229 GO:0009507 GO:0009651 GO:0055114																																																															
comp51985_c0_seq1 GO:0009941 GO:0008508 GO:0016020 GO:0035725																																																																			
comp51986_c1_seq1 GO:0005886 GO:0005774 GO:0009821 GO:0005576 GO:0009507 GO:0005783 GO:0016844																																																																
comp51988_c0_seq1 GO:0003723 GO:0005634 GO:0009536																																																																				
comp51989_c0_seq3 GO:0009737 GO:0009651																																																																					
comp51990_c1_seq3 GO:0005509 GO:0005544																																																																					
comp51992_c0_seq1 GO:0008270 GO:0003676 GO:0005622																																																																				
comp51993_c0_seq6 GO:0006281 GO:0006355 GO:0016023 GO:0000394 GO:0000439 GO:0006366																																																																	
comp51995_c0_seq2 GO:0016049 GO:0006623 GO:0005483 GO:0000325 GO:0016558 GO:0000149 GO:0000902 GO:0004872 GO:0006891 GO:0006896 GO:0006869 GO:0005774 GO:0005770 GO:0016197 GO:0006944 GO:0005802 GO:0030140 GO:0010351 GO:0009630 GO:0005634 GO:0005886																																																		
comp51996_c0_seq2 GO:0016021 GO:0005783 GO:0005794 GO:0016192 GO:0005739																																																																		
comp51997_c0_seq1 GO:0055085 GO:0015706 GO:0005739 GO:0016021 GO:0009627 GO:0002237 GO:0031347 GO:0005351 GO:0009567 GO:0006487																																																													
comp51998_c0_seq1 GO:0051436 GO:0043123 GO:0003735 GO:0002479 GO:0006281 GO:0034138 GO:0030512 GO:0000216 GO:0034142 GO:0008063 GO:0046788 GO:0000084 GO:0006414 GO:0046872 GO:0006977 GO:0048011 GO:0005654 GO:0007220 GO:0031145 GO:0008624 GO:0006413 GO:0019221 GO:0034130 GO:0006916 GO:0002020 GO:0061418 GO:0007254 GO:0045944 GO:0006415 GO:0007219 GO:0002755 GO:0005886 GO:0006614 GO:0042059 GO:0051092 GO:0006367 GO:0070423 GO:0010008 GO:0000122 GO:0032480 GO:0051437 GO:0035666 GO:0016044 GO:0019083 GO:0050852 GO:0034134 GO:0000080 GO:0030666 GO:0000187 GO:0000184 GO:0008543 GO:0022627 GO:0000209 GO:0016197																	
comp51999_c0_seq1 GO:0005768 GO:0009744 GO:0005794 GO:0080147 GO:0009749 GO:0009750 GO:0005783 GO:0005802																																																															
comp52000_c0_seq1 GO:0044237 GO:0007165																																																																					
comp52001_c0_seq1 GO:0006944 GO:0046872 GO:0048193 GO:0010200 GO:0009506																																																																		
comp52002_c0_seq1 GO:0016740																																																																						
comp52003_c0_seq1 GO:0003723 GO:0032259 GO:0019836 GO:0008168 GO:0005739																																																																		
comp52005_c0_seq2 GO:0031167 GO:0009409 GO:0016422 GO:0000179 GO:0009536																																																																		
comp52007_c0_seq1 GO:0005774																																																																						
comp52008_c0_seq1 GO:0006066 GO:0050660 GO:0044237 GO:0009507 GO:0008812 GO:0005634 GO:0046593 GO:0055114																																																															
comp52009_c2_seq2 GO:0004721 GO:0006397 GO:0006470 GO:0009507 GO:0005634 GO:0005739																																																																	
comp52010_c0_seq3 GO:0006457 GO:0006950 GO:0031072 GO:0009570 GO:0051082 GO:0005634 GO:0009416																																																																
comp52011_c0_seq1 GO:0005634																																																																						
comp52012_c0_seq17 GO:0019253 GO:0006098 GO:0042742 GO:0046872 GO:0009409 GO:0009941 GO:0009535 GO:0009570 GO:0004750 GO:0009624 GO:0009793 GO:0010319 GO:0048046																																																										
comp52013_c0_seq2 GO:0005737 GO:0006355																																																																					
comp52015_c0_seq1 GO:0005739																																																																						
comp52018_c0_seq1 GO:0042742 GO:0009814 GO:0050832 GO:0009966 GO:0071310																																																																		
comp52019_c0_seq1 GO:0031225 GO:0005576 GO:0004222 GO:0006508 GO:0031012 GO:0008270																																																																	
comp52022_c2_seq1 GO:0042539 GO:0005513 GO:0005515 GO:0030007 GO:0005737																																																																		
comp52023_c0_seq2 GO:0080005 GO:0006470 GO:0009767 GO:0005730 GO:0046872 GO:0008287 GO:0009579 GO:0004722 GO:0009570																																																														
comp52025_c0_seq1 GO:0016132 GO:0008270 GO:0006355 GO:0016023 GO:0031225																																																																		
comp52026_c0_seq10 GO:0031425 GO:0009507 GO:0016556 GO:0005739																																																																			
comp52027_c0_seq3 GO:0005634																																																																						
comp52028_c0_seq4 GO:0051716 GO:0009628 GO:0006950 GO:0050789																																																																			
comp52030_c0_seq1 GO:0003677 GO:0006355																																																																					
comp52031_c0_seq2 GO:0001510 GO:0006412 GO:0005618 GO:0003723 GO:0005730 GO:0009506 GO:0003735 GO:0022627 GO:0009507 GO:0016020																																																													
comp52033_c0_seq3 GO:0046872																																																																						
comp52034_c0_seq2 GO:0016630 GO:0000166 GO:0055114 GO:0009507																																																																			
comp52036_c0_seq3 GO:0009934 GO:0006261 GO:0010026 GO:0000724 GO:0008283 GO:0010468 GO:0005678 GO:0009555 GO:0048366 GO:0006334 GO:0031507 GO:0045787																																																											
comp52037_c0_seq3 GO:0003723 GO:0000398 GO:0009570 GO:0005634 GO:0000166																																																																		
comp52039_c0_seq2 GO:0016192 GO:0006661 GO:0005886																																																																				
comp52040_c0_seq1 GO:0000186 GO:0006944 GO:0010363 GO:0006612 GO:0043069 GO:0000165 GO:0004709 GO:0005886 GO:0030968 GO:0005524																																																													
comp52042_c0_seq2 GO:0048868 GO:0016043 GO:0048610																																																																				
comp52046_c1_seq3 GO:0005794 GO:0009834 GO:0050832 GO:0009737 GO:0016020 GO:0005783																																																																	
comp52047_c0_seq2 GO:0004806 GO:0005739 GO:0006629																																																																				
comp52048_c0_seq1 GO:0006631 GO:0004300 GO:0005739																																																																				
comp52049_c0_seq1 GO:0006457 GO:0009408 GO:0019003 GO:0016023 GO:0016114 GO:0003924 GO:0070300 GO:0009644 GO:0042542 GO:0005525																																																													
comp52050_c0_seq1 GO:0016021 GO:0071918 GO:0005737 GO:0015204 GO:0015250 GO:0006833																																																																	
comp52052_c0_seq1 GO:0016311 GO:0009986 GO:0019375 GO:0003993 GO:0004722 GO:0005576 GO:0045892 GO:0005773 GO:0042542 GO:0016036 GO:0030643																																																												
comp52053_c0_seq4 GO:0000085 GO:0004402 GO:0016023 GO:0051567 GO:0016579 GO:0080008 GO:0005834 GO:0016575 GO:0000956 GO:0006342 GO:0010388 GO:0009640 GO:0016567 GO:0009409 GO:0016572 GO:0045893 GO:0005634 GO:0016573																																																					
comp52054_c0_seq1 GO:0017089 GO:0051861 GO:0046836 GO:0009536 GO:0005886																																																																		
comp52055_c0_seq2 GO:0009793 GO:0010027 GO:0005515 GO:0005634 GO:0009536 GO:0005739																																																																	
comp52057_c0_seq1 GO:0010333 GO:0000287 GO:0008152																																																																				
comp52058_c0_seq2 GO:0009970																																																																						
comp52059_c0_seq1 GO:0046854 GO:0004430 GO:0009536 GO:0043424																																																																			
comp52061_c0_seq1 GO:0009611 GO:0008152																																																																					
comp52064_c0_seq4 GO:0005773 GO:0005525 GO:0005886 GO:0009873 GO:0007264 GO:0015031																																																																	
comp52066_c0_seq5 GO:0005634 GO:0005737																																																																					
comp52067_c0_seq1 GO:0019898 GO:0031977 GO:0008266 GO:0055114 GO:0005509 GO:0042742 GO:0009941 GO:0009535 GO:0009570 GO:0032440 GO:0015979 GO:0009654 GO:0048046																																																										
comp52068_c0_seq3 GO:0005737 GO:0005730 GO:0006511																																																																				
comp52069_c0_seq5 GO:0045454 GO:0019932 GO:0005737																																																																				
comp52072_c0_seq3 GO:0010540 GO:0009845 GO:0004871 GO:0005834 GO:0005515 GO:0009817 GO:0048527 GO:0007186																																																															
comp52073_c0_seq2 GO:0042744 GO:0030327 GO:0005774 GO:0045338 GO:0001735 GO:0009738 GO:0005576																																																																
comp52074_c0_seq1 GO:0006310 GO:0006281 GO:0003676 GO:0006260 GO:0009536 GO:0005524 GO:0043140																																																																
comp52075_c0_seq1 GO:0005829 GO:0006511 GO:0007049 GO:0019005 GO:0031625 GO:0009960 GO:0009911 GO:0004842 GO:0009630 GO:0008284 GO:0009639 GO:0005634 GO:0009793																																																										
comp52076_c0_seq2 GO:0003676 GO:0005739 GO:0008026 GO:0009220 GO:0005524 GO:0009507																																																																	
comp52077_c1_seq19 GO:0005739																																																																						
comp52078_c0_seq1 GO:0006468 GO:0004672 GO:0044699 GO:0000166 GO:0007154																																																																		
comp52079_c0_seq2 GO:0006098 GO:0009941 GO:0035304 GO:0010207 GO:0030093 GO:0009508 GO:0009773 GO:0003677 GO:0009737 GO:0006364 GO:0010027																																																												
comp52080_c0_seq2 GO:0033772 GO:0009055 GO:0005506 GO:0020037 GO:0019825 GO:0051792 GO:0080110 GO:0055114																																																															
comp52081_c0_seq1 GO:0005829 GO:0005516 GO:0048767 GO:0015706 GO:0004351 GO:0010359 GO:0000041 GO:0006536 GO:0010167 GO:0046686 GO:0030170																																																												
comp52081_c1_seq1 GO:0030170 GO:0006536 GO:0004351																																																																				
comp52083_c1_seq4 GO:0003676																																																																						
comp52084_c0_seq8 GO:0016746																																																																						
comp52085_c0_seq1 GO:0050643 GO:0005737																																																																					
comp52088_c0_seq1 GO:0052727 GO:0016117 GO:0052728 GO:0045436 GO:0016120 GO:0016705 GO:0055114																																																																
comp52093_c1_seq1 GO:0006468 GO:0004674 GO:0005524 GO:0050794																																																																			
comp52094_c0_seq4 GO:0042538 GO:0042742 GO:0009269 GO:0009409 GO:0016023 GO:0009737 GO:0005634																																																																
comp52095_c0_seq1 GO:0009055 GO:0045454 GO:0015035																																																																				
comp52096_c0_seq1 GO:0030599 GO:0042545 GO:0005576 GO:0009505 GO:0043086 GO:0045330 GO:0004857																																																																
comp52098_c0_seq6 GO:0005634 GO:0009507																																																																					
comp52099_c0_seq2 GO:0005488																																																																						
comp52100_c0_seq1 GO:0010351 GO:0005768 GO:0015385 GO:0006885 GO:0016021 GO:0035725																																																																	
comp52102_c0_seq12 GO:0046872 GO:0044424 GO:0003676																																																																				
comp52104_c0_seq2 GO:0050616 GO:0009055 GO:0004497 GO:0005506 GO:0020037 GO:0016705 GO:0005739 GO:0055114																																																															
comp52105_c0_seq2 GO:0060003 GO:0022626 GO:0004298 GO:0004008 GO:0016021 GO:0006511 GO:0046872 GO:0006754 GO:0019773 GO:0009535 GO:0005886 GO:0005524																																																											
comp52106_c0_seq4 GO:0006098 GO:0010218 GO:0019252 GO:0010114 GO:0009902 GO:0015979 GO:0000023 GO:0005509 GO:0015995 GO:0009654 GO:0009637 GO:0019898 GO:0009543 GO:0042793 GO:0009535 GO:0006364 GO:0010027																																																						
comp52107_c0_seq1 GO:0003827 GO:0008455 GO:0042732 GO:0005795 GO:0009312 GO:0016021 GO:0005739																																																																
comp52108_c1_seq4 GO:0006476 GO:0008270 GO:0031348 GO:0042742 GO:0005677 GO:0070403 GO:0003677 GO:0006342 GO:0005737																																																														
comp52110_c0_seq1 GO:0001510 GO:0009560 GO:0005829 GO:0000741 GO:0006364 GO:0009909 GO:0009220 GO:0005634																																																															
comp52112_c0_seq1 GO:0030246																																																																						
comp52113_c0_seq15 GO:0044238 GO:0051726 GO:0044260 GO:0005515 GO:0005634																																																																		
comp52117_c0_seq3 GO:0030001 GO:0046872																																																																					
comp52118_c0_seq1 GO:0009805 GO:0005622 GO:0006355 GO:0009611 GO:0009963																																																																		
comp52119_c0_seq1 GO:0005634																																																																						
comp52121_c2_seq1 GO:0003723																																																																						
comp52123_c0_seq2 GO:0005739																																																																						
comp52124_c0_seq1 GO:0004181 GO:0008270 GO:0009409 GO:0000398 GO:0006508 GO:0019252 GO:0009568 GO:0005634																																																															
comp52125_c0_seq1 GO:0006396 GO:0022402 GO:0009932 GO:0051015 GO:0002679 GO:0010200 GO:0005911 GO:0015824 GO:0010583 GO:0045010 GO:0009407 GO:0005522 GO:0005886																																																										
comp52129_c0_seq1 GO:0001510 GO:0005829 GO:0015030 GO:0003676 GO:0010455 GO:0005730 GO:0006355 GO:0005732 GO:0000398 GO:0009536 GO:0009834 GO:0048829 GO:0003700																																																										
comp52130_c0_seq2 GO:0006623 GO:0005737 GO:0006944 GO:0048193 GO:0010200 GO:0005886 GO:0016459 GO:0003774																																																															
comp52132_c0_seq1 GO:0016572 GO:0009505 GO:0042545 GO:0030599 GO:0005576 GO:0045330 GO:0016020																																																																
comp52134_c0_seq1 GO:0009505 GO:0005773 GO:0016023 GO:0005576 GO:0008152 GO:0003824																																																																	
comp52134_c1_seq1 GO:0046872 GO:0005622 GO:0035556																																																																				
comp52135_c0_seq4 GO:0005794 GO:0016757																																																																					
comp52136_c0_seq1 GO:0009825 GO:0048767 GO:2000021 GO:0005509 GO:0000271 GO:0009932 GO:0071555 GO:0042538 GO:0009705 GO:0043481 GO:0010817 GO:0005515 GO:0009507 GO:0003824 GO:0019722 GO:0005886																																																							
comp52137_c0_seq1 GO:0005737 GO:0006635 GO:0003860 GO:0004300 GO:0080167																																																																		
comp52138_c0_seq1 GO:0010075 GO:0005886 GO:0015171 GO:0006865 GO:0016021																																																																		
comp52140_c0_seq2 GO:0016579 GO:0031372 GO:0004842 GO:0006301																																																																			
comp52141_c0_seq10 GO:0005739 GO:0009507																																																																					
comp52143_c0_seq1 GO:0055085 GO:0044070 GO:0010029 GO:0005618 GO:0015288 GO:0009527 GO:0005730 GO:0042742 GO:0009409 GO:0009941 GO:0005741 GO:0005774 GO:0009060 GO:0008308 GO:0046930 GO:0005886																																																							
comp52144_c0_seq2 GO:0009611 GO:0004708 GO:0005515 GO:0009862 GO:0030295 GO:0009693 GO:0009873 GO:0010200 GO:0002229 GO:0010120 GO:0009651 GO:0042742 GO:0046777 GO:0004674 GO:0045860 GO:0006569 GO:0009926 GO:0009684 GO:0019344 GO:0045893 GO:0005524 GO:0005739																																																	
comp52145_c0_seq2 GO:0006511 GO:0031966 GO:0051788 GO:0005975 GO:0080129 GO:0005774 GO:0009853 GO:0003824 GO:0005886 GO:0045271																																																													
comp52147_c0_seq5 GO:0005381 GO:0016021 GO:0034755 GO:0009941 GO:0006879 GO:0016787 GO:0005886																																																																
comp52148_c0_seq2 GO:0006623 GO:0006888 GO:0009507 GO:0005829 GO:0042406																																																																		
comp52151_c0_seq2 GO:0006417 GO:0006355 GO:0046983 GO:0009734 GO:0005634																																																																		
comp52152_c0_seq3 GO:0009060 GO:0048825 GO:0004322 GO:0042542 GO:0005739 GO:0051301																																																																	
comp52153_c0_seq1 GO:0010075 GO:0051322 GO:0000911 GO:0008283 GO:0009506 GO:0000226 GO:0051707 GO:0005576 GO:0016020																																																														
comp52154_c0_seq2 GO:0010103 GO:0006098 GO:0010218 GO:0000038 GO:0010114 GO:0010207 GO:0019288 GO:0009902 GO:0015995 GO:0009965 GO:0009637 GO:0006417 GO:0030154 GO:0042335 GO:0003700 GO:0045893 GO:0009535 GO:0006364 GO:0010027																																																				
comp52155_c0_seq2 GO:0006457 GO:0051082 GO:0005737 GO:0031072																																																																			
comp52156_c0_seq4 GO:0016021 GO:0042631 GO:0009507																																																																				
comp52157_c0_seq2 GO:0009062 GO:0000139 GO:0005789 GO:0004091 GO:0010296 GO:0009737 GO:0005576 GO:0009507																																																															
comp52158_c1_seq4 GO:0009739 GO:0006970 GO:0005198 GO:0005886																																																																			
comp52159_c0_seq4 GO:0043231																																																																						
comp52160_c0_seq1 GO:0006655 GO:0010103 GO:0005739 GO:0016226 GO:0019288 GO:0009507 GO:0045036 GO:0009073																																																															
comp52161_c1_seq1 GO:0005634																																																																						
comp52162_c0_seq1 GO:0005886 GO:0006857 GO:0005215																																																																				
comp52163_c0_seq1 GO:0051879 GO:0005737 GO:0006950																																																																				
comp52164_c0_seq2 GO:0046872 GO:0009055 GO:0009767 GO:0009570 GO:0051537 GO:0009416 GO:0080167																																																																
comp52164_c1_seq1 GO:0005743 GO:0005886 GO:0005515 GO:0005618 GO:0006810 GO:0016021 GO:0009507																																																																
comp52165_c0_seq3 GO:0016021 GO:0005634 GO:0006355																																																																				
comp52169_c0_seq1 GO:0005840 GO:0009773 GO:0019843 GO:0019288 GO:0009941 GO:0009535 GO:0000166 GO:0009570 GO:0045036																																																														
comp52171_c0_seq2 GO:0035672 GO:0015421 GO:0008559 GO:0016021 GO:0000325 GO:0006200 GO:0043190 GO:0005774 GO:0010044 GO:0005524 GO:0005886																																																												
comp52173_c0_seq1 GO:0009705 GO:0046961 GO:0009793 GO:0033178 GO:0022626 GO:0046933 GO:0009651 GO:0015991 GO:0042742 GO:0007030 GO:0042777 GO:0009409 GO:0009832 GO:0005886 GO:0005524																																																								
comp52175_c0_seq1 GO:0051082 GO:0005739 GO:0031072																																																																				
comp52176_c0_seq1 GO:0005777 GO:0008152 GO:0008756 GO:0009507																																																																			
comp52176_c2_seq1 GO:0003824 GO:0008152																																																																					
comp52178_c0_seq5 GO:0019901 GO:0005634 GO:0000079 GO:0051301																																																																			
comp52179_c0_seq1 GO:0016020																																																																						
comp52182_c0_seq2 GO:0022416 GO:0035220 GO:0004478 GO:0006556 GO:0006730 GO:0005524 GO:0000287 GO:0005737 GO:0015948																																																														
comp52183_c0_seq5 GO:0005739																																																																						
comp52185_c1_seq1 GO:0005829 GO:0042803 GO:0005634 GO:0016829																																																																			
comp52186_c0_seq5 GO:0009725 GO:0016021 GO:0009651 GO:0009744																																																																			
comp52187_c0_seq3 GO:0009658 GO:0006364 GO:0042780 GO:0009507 GO:0016556 GO:0005634 GO:0042781																																																																
comp52188_c0_seq1 GO:0009536																																																																						
comp52189_c0_seq1 GO:0016132 GO:0005794 GO:0005886 GO:0006863 GO:0008514 GO:0016021 GO:0005783																																																																
comp52190_c0_seq1 GO:0000911 GO:0051322 GO:0010389 GO:0003676 GO:0009909 GO:0000724 GO:0016444 GO:0051567 GO:0031047 GO:0009555 GO:0005515 GO:0006270 GO:0008283 GO:0006275 GO:0006306 GO:0005634																																																							
comp52191_c0_seq1 GO:0005774 GO:0009535 GO:0005783 GO:0005886																																																																			
comp52192_c0_seq1 GO:0015416 GO:0007034 GO:0006200 GO:0005524 GO:0005775 GO:0009624 GO:0005886 GO:0006865																																																															
comp52193_c0_seq1 GO:0019684 GO:0009941 GO:0009534 GO:0030003 GO:0070838 GO:0005198 GO:0019761 GO:0019344 GO:0035304																																																														
comp52195_c0_seq1 GO:0005794 GO:0016757																																																																					
comp52196_c0_seq1 GO:0010363 GO:0005739 GO:0006623 GO:0009963 GO:0009060 GO:0006612 GO:0006096 GO:0009507 GO:0046686																																																														
comp52197_c0_seq2 GO:0034968 GO:0005739 GO:0009909 GO:0009640 GO:0009220 GO:0010388 GO:0000085																																																																
comp52198_c0_seq1 GO:0005737 GO:0006415 GO:0016149 GO:0005886																																																																			
comp52198_c1_seq2 GO:0005737 GO:0006415 GO:0016149 GO:0005886																																																																			
comp52199_c0_seq1 GO:0055085 GO:0005739 GO:0016021 GO:0042626 GO:0005524 GO:0016757																																																																	
comp52200_c0_seq1 GO:0010044 GO:0005886																																																																					
comp52201_c0_seq2 GO:0008270 GO:0005622																																																																					
comp52202_c0_seq1 GO:0006974 GO:0043231 GO:0016616 GO:0044702 GO:0006520 GO:0006139 GO:0044444 GO:0044248																																																															
comp52203_c0_seq5 GO:0006355 GO:0010014 GO:0009062 GO:0010073 GO:0043565 GO:0003700 GO:0009855 GO:0005634																																																															
comp52204_c1_seq5 GO:0005739 GO:0016020																																																																					
comp52206_c2_seq1 GO:0006355 GO:0003677 GO:0003700 GO:0005634																																																																			
comp52207_c0_seq4 GO:0048193 GO:0030244 GO:0016021																																																																				
comp52208_c0_seq2 GO:0007049																																																																						
comp52209_c0_seq1 GO:0004816 GO:0006421 GO:0003676 GO:0005739 GO:0005524 GO:0009507																																																																	
comp52211_c0_seq2 GO:0016788 GO:0003676 GO:0009507 GO:0006310 GO:0006281																																																																		
comp52214_c1_seq1 GO:0016301 GO:0005886 GO:0016310 GO:0048364 GO:0010167 GO:0007165																																																																	
comp52215_c0_seq1 GO:0046872 GO:0006950 GO:0004784 GO:0006801 GO:0009507 GO:0010038 GO:0055114																																																																
comp52216_c0_seq3 GO:0005840 GO:0003735 GO:0006412 GO:0005739																																																																			
comp52217_c0_seq1 GO:0003777 GO:0005089 GO:0005875 GO:0000226 GO:0080147 GO:0009860 GO:0019861 GO:0005737 GO:0005634																																																														
comp52220_c0_seq2 GO:0003677 GO:0006355																																																																					
comp52221_c0_seq1 GO:0005852 GO:0006446 GO:0003743 GO:0005634 GO:0043022																																																																		
comp52222_c0_seq1 GO:0003677 GO:0009086 GO:0006367 GO:0000394 GO:0005634																																																																		
comp52223_c0_seq3 GO:0019243 GO:0008535 GO:0005507 GO:0005886 GO:0009507																																																																		
comp52224_c0_seq1 GO:0031225 GO:0005576 GO:0004222 GO:0006508 GO:0031012 GO:0008270																																																																	
comp52225_c2_seq12 GO:0016021 GO:0008324 GO:0006812 GO:0055085																																																																			
comp52226_c0_seq1 GO:0009941 GO:0005743 GO:0055085 GO:0005509 GO:0016021																																																																		
comp52228_c0_seq1 GO:0006355 GO:0003677 GO:0010089 GO:0003700 GO:0043067 GO:0048367 GO:0005634																																																																
comp52229_c0_seq1 GO:0009624 GO:0005886 GO:0071577 GO:0032440 GO:0016021 GO:0005385 GO:0055114																																																																
comp52230_c0_seq1 GO:0009501 GO:0009513 GO:0009965 GO:0016117 GO:0009658 GO:0009509 GO:0010239 GO:0009537 GO:0009507																																																														
comp52231_c0_seq4 GO:0004806 GO:0005634 GO:0006629																																																																				
comp52232_c0_seq1 GO:0046872 GO:0009941 GO:0009055 GO:0010277 GO:0051537 GO:0055114																																																																	
comp52233_c0_seq1 GO:0005634																																																																						
comp52234_c0_seq4 GO:0009813 GO:0009505 GO:0042545 GO:0016023 GO:0030599 GO:0045330 GO:0009507 GO:0009411																																																															
comp52235_c0_seq1 GO:0009536																																																																						
comp52236_c0_seq1 GO:0006355 GO:0003677 GO:0010089 GO:0043067 GO:0048367																																																																		
comp52237_c0_seq1 GO:0005829 GO:0016558 GO:0006891 GO:0005778 GO:0006869 GO:0009733 GO:0005052 GO:0006635 GO:0005515 GO:0010351 GO:0005634																																																												
comp52238_c0_seq2 GO:0033744 GO:0034599 GO:0006464 GO:0009570 GO:0008113 GO:0009416 GO:0055114 GO:0080167																																																															
comp52239_c0_seq2 GO:0000394 GO:0009880 GO:0050826 GO:0009739 GO:0008270 GO:0009910 GO:0034243 GO:0048825 GO:0051301 GO:0009640 GO:0005829 GO:0010564 GO:0019915 GO:0010182 GO:0016567 GO:0003677 GO:0009845 GO:0010228 GO:0045595 GO:0048366 GO:0007062 GO:0005634 GO:0010072 GO:0010162																																															
comp52241_c0_seq3 GO:0005829 GO:0006511 GO:0016049 GO:0006623 GO:0009651 GO:0051788 GO:0000902 GO:0080129 GO:0009266 GO:0016023 GO:0006972 GO:0006833 GO:0007030 GO:0006096 GO:0007033 GO:0048193 GO:0009853 GO:0046686 GO:0005794 GO:0005783 GO:0005525 GO:0005886																																																	
comp52242_c1_seq2 GO:0046872 GO:0005794																																																																					
comp52243_c0_seq1 GO:0045491																																																																						
comp52244_c0_seq2 GO:0043231																																																																						
comp52245_c0_seq3 GO:0048193 GO:0030244																																																																					
comp52247_c0_seq1 GO:0009987																																																																						
comp52247_c1_seq1 GO:0006355																																																																						
comp52248_c0_seq2 GO:0009414 GO:0009409 GO:0042538 GO:0043565 GO:0006944 GO:0003700 GO:0009738 GO:0045893 GO:0005634																																																														
comp52249_c0_seq3 GO:0042538 GO:0009409 GO:0005886 GO:0006810 GO:0005774 GO:0005783 GO:0009408 GO:0009416 GO:0005739 GO:0005215																																																													
comp52250_c0_seq1 GO:0052662 GO:0052663 GO:0055114 GO:0009540																																																																			
comp52251_c2_seq1 GO:0007031 GO:0008270 GO:0005739 GO:0042538 GO:0004587 GO:0006635 GO:0006561 GO:0010260 GO:0019544 GO:0030170 GO:0006593																																																												
comp52252_c0_seq1 GO:0010363 GO:0045140 GO:0030148 GO:0010200 GO:0006612 GO:0006944 GO:0043069 GO:0005802 GO:0009723 GO:0050832 GO:0005886																																																												
comp52253_c1_seq5 GO:0005739																																																																						
comp52254_c0_seq1 GO:0009987																																																																						
comp52255_c0_seq4 GO:0005737 GO:0008168 GO:0032259																																																																				
comp52256_c0_seq1 GO:0010264 GO:0016020 GO:0009507																																																																				
comp52257_c0_seq2 GO:0010206 GO:0004252 GO:0009543 GO:0006508																																																																			
comp52258_c0_seq2 GO:0019904 GO:0046686 GO:0005886 GO:0005774 GO:0009507 GO:0005634 GO:0005829 GO:0048046 GO:0009742																																																														
comp52259_c0_seq2 GO:0046777 GO:0071482 GO:0006364 GO:0035970 GO:0010027 GO:0010155 GO:0009570 GO:0010207 GO:0016787																																																														
comp52261_c0_seq1 GO:0007049																																																																						
comp52262_c0_seq1 GO:0019216 GO:0010506 GO:0004768 GO:0006633 GO:0055114 GO:0048047 GO:0016021 GO:0006723 GO:0042811 GO:0031410 GO:0060179 GO:0005811 GO:0005783																																																										
comp52264_c0_seq1 GO:0005829 GO:0016049 GO:0030955 GO:0010431 GO:0030243 GO:0005524 GO:0004743 GO:0000287 GO:0006096 GO:0016310 GO:0009570 GO:0009832 GO:0046686 GO:0016126																																																									
comp52267_c0_seq3 GO:0006470 GO:0046872 GO:0004722 GO:0008287																																																																			
comp52268_c0_seq3 GO:0045493 GO:0005829 GO:0010411 GO:0005982 GO:0009506 GO:0032450 GO:0009505 GO:0080176 GO:0016023 GO:0046556 GO:0009664 GO:0009507 GO:0009832 GO:0046686 GO:0030246 GO:0009044 GO:0048046																																																						
comp52269_c0_seq1 GO:0009555 GO:0009987																																																																					
comp52271_c0_seq1 GO:0016023																																																																						
comp52272_c0_seq1 GO:0071482 GO:0005618 GO:0042744 GO:0055114 GO:0031304 GO:0050660 GO:0003954 GO:0009534 GO:0010287																																																														
comp52273_c0_seq2 GO:0005247 GO:0009705 GO:0006821																																																																				
comp52275_c0_seq2 GO:0009717 GO:0046983 GO:0032259 GO:0033800																																																																			
comp52276_c0_seq2 GO:0009725 GO:0016021 GO:0004872 GO:0005739 GO:0009744																																																																		
comp52277_c0_seq1 GO:0005488 GO:0009416																																																																					
comp52278_c0_seq2 GO:0005730 GO:0003735 GO:0005886 GO:0003723 GO:0005618 GO:0022627 GO:0009507 GO:0006412																																																															
comp52279_c0_seq3 GO:0006468 GO:0004674 GO:0031348 GO:0009627 GO:0005524 GO:0010200 GO:0009863 GO:0009507 GO:0006995 GO:0050832 GO:0005886 GO:0009697																																																											
comp52280_c0_seq4 GO:0005622 GO:0005488																																																																					
comp52281_c2_seq2 GO:0006869																																																																						
comp52282_c0_seq2 GO:0009507																																																																						
comp52283_c0_seq1 GO:0043231 GO:0044444																																																																					
comp52284_c0_seq2 GO:0008152 GO:0016787 GO:0005739																																																																				
comp52285_c0_seq2 GO:0016747 GO:0006633 GO:0009409 GO:0005576 GO:0016020 GO:0005783 GO:0009416																																																																
comp52287_c0_seq1 GO:0040008 GO:0033612 GO:0010014 GO:0009909 GO:0048449 GO:0009965 GO:0010073 GO:0016491 GO:0048481 GO:0016570 GO:0016310 GO:0016301 GO:0007165 GO:0009855 GO:0005886																																																								
comp52291_c0_seq1 GO:0071944																																																																						
comp52292_c0_seq2 GO:0005773 GO:0008152 GO:0052692																																																																				
comp52293_c0_seq1 GO:0016021 GO:0005789 GO:0006950 GO:0006508																																																																			
comp52295_c0_seq2 GO:0009560 GO:0005829 GO:0034968 GO:0000502 GO:0045132 GO:0006302 GO:0009909 GO:0009640 GO:0006312 GO:0010388 GO:0042138 GO:0007062 GO:0007129 GO:0007131 GO:0000085																																																								
comp52296_c0_seq1 GO:0009639 GO:0005634 GO:0006301																																																																				
comp52297_c0_seq4 GO:0006364 GO:0009535 GO:0009657 GO:0010207																																																																			
comp52297_c1_seq1 GO:0016021																																																																						
comp52298_c0_seq1 GO:0006007 GO:0003723 GO:0005739 GO:0009536 GO:0005524 GO:0008378 GO:0004386 GO:0009969 GO:0016020 GO:0005794 GO:0005634																																																												
comp52299_c1_seq2 GO:0004725 GO:0009825 GO:0004300 GO:0009923 GO:0080023 GO:0016021 GO:0043481 GO:0048767 GO:0005829 GO:0048640 GO:0050732 GO:0010817 GO:0042761 GO:0000271 GO:0051302 GO:0019344 GO:0009932 GO:0005634 GO:0071555 GO:0005739																																																			
comp52300_c0_seq3 GO:0005622 GO:0006810 GO:0005886 GO:0005215																																																																			
comp52301_c0_seq2 GO:0005525 GO:0016021 GO:0015684 GO:0005634 GO:0015093																																																																		
comp52303_c0_seq1 GO:0005737 GO:0010200 GO:0016567 GO:0004842 GO:0000151																																																																		
comp52305_c0_seq1 GO:0016157 GO:0009058 GO:0005985																																																																				
comp52306_c0_seq6 GO:0009688																																																																						
comp52307_c0_seq1 GO:0005739																																																																						
comp52308_c0_seq2 GO:0044444 GO:0043231																																																																					
comp52310_c0_seq2 GO:0006623 GO:0016197 GO:0006944 GO:0048193 GO:0016020																																																																		
comp52311_c0_seq1 GO:0005773 GO:0004091 GO:0009086 GO:0000394 GO:0005634																																																																		
comp52312_c0_seq16 GO:0004077 GO:0004078 GO:0045333 GO:0006464 GO:0005576 GO:0009507 GO:0005829 GO:0015979 GO:0042966																																																														
comp52313_c0_seq5 GO:0010363 GO:0031348 GO:0005622 GO:0009627 GO:0010200 GO:0006612 GO:0006944 GO:0043069 GO:0030968 GO:0009863 GO:0050832 GO:0009697																																																											
comp52314_c0_seq1 GO:0006351																																																																						
comp52317_c0_seq1 GO:0010155 GO:0009522 GO:0006098 GO:0009749 GO:0010218 GO:0009941 GO:0042744 GO:0048046 GO:0009744 GO:0051287 GO:0010319 GO:0006636 GO:0010114 GO:0010207 GO:0019288 GO:0050661 GO:0009902 GO:0042742 GO:0016021 GO:0015995 GO:0009773 GO:0005829 GO:0019216 GO:0004365 GO:0010304 GO:0006096 GO:0009570 GO:0009637 GO:0019253 GO:0009644 GO:0046686 GO:0009409 GO:0019344 GO:0047100 GO:0009535 GO:0006364 GO:0031408																																		
comp52321_c0_seq9 GO:0006979 GO:0055114 GO:0046872 GO:0009536 GO:0004601 GO:0004722 GO:0020037 GO:0008419 GO:0006397 GO:0005634 GO:0009790																																																												
comp52322_c0_seq1 GO:0005829 GO:0005545 GO:0048268 GO:0030276 GO:0030118 GO:0016491 GO:0050794 GO:0006351 GO:0005634 GO:0005886																																																													
comp52325_c0_seq1 GO:0034399																																																																						
comp52326_c0_seq1 GO:0009862 GO:0009733 GO:0005739																																																																				
comp52327_c0_seq2 GO:0003723 GO:0003964 GO:0006278																																																																				
comp52328_c0_seq5 GO:0016706 GO:0008152																																																																					
comp52330_c0_seq1 GO:0071944																																																																						
comp52331_c2_seq3 GO:0047262 GO:0035556 GO:0030968 GO:0006979 GO:0005794 GO:0016051 GO:0016126 GO:0009738																																																															
comp52332_c0_seq2 GO:0006399 GO:0009793 GO:0009658 GO:0006364 GO:0009507																																																																		
comp52334_c0_seq4 GO:0016161 GO:0009934 GO:0010048 GO:0010480 GO:0009740 GO:0019252 GO:0009825 GO:0009664 GO:0010075 GO:0000023 GO:0007389 GO:0043481 GO:0048767 GO:0007169 GO:0048831 GO:0008361 GO:0006468 GO:0004674 GO:0009570 GO:0043169 GO:0009926 GO:0003700 GO:0009832 GO:0000272 GO:0009932 GO:0033612 GO:0048229 GO:0005886 GO:0005634 GO:0005524 GO:0010162																																								
comp52335_c0_seq1 GO:0005773																																																																						
comp52336_c0_seq1 GO:0005739 GO:0009536																																																																					
comp52337_c0_seq1 GO:0051287 GO:0004450 GO:0000287 GO:0006099 GO:0009570 GO:0009534 GO:0006102 GO:0005739																																																															
comp52339_c0_seq1 GO:0016023 GO:0003993																																																																					
comp52341_c0_seq1 GO:0005507 GO:0050660 GO:0009055 GO:0005739																																																																			
comp52344_c1_seq5 GO:0043161 GO:0051510 GO:0035556 GO:0043248 GO:0051788 GO:0005838 GO:0042023																																																																
comp52345_c0_seq1 GO:0009684 GO:0008270 GO:0005739 GO:0009409 GO:0009001 GO:0005515 GO:0006569 GO:0009970 GO:0006535 GO:0009507 GO:0046686 GO:0019761 GO:0005634																																																										
comp52346_c0_seq2 GO:0005743 GO:0055085 GO:0006839 GO:0015824 GO:0016021 GO:0005215																																																																	
comp52348_c0_seq4 GO:0000038 GO:0008289 GO:0006869 GO:0042335 GO:0005576 GO:0009535																																																																	
comp52350_c0_seq1 GO:0005789 GO:0006457 GO:0051322 GO:0009644 GO:0034976 GO:0000226 GO:0042542 GO:0016758 GO:0009408 GO:0009536																																																													
comp52351_c0_seq2 GO:0009693 GO:0006661																																																																					
comp52352_c1_seq3 GO:0004185 GO:0006508																																																																					
comp52354_c0_seq1 GO:0048869 GO:0044238 GO:0016049 GO:0009416 GO:0009058 GO:0060560 GO:0010015 GO:0010817 GO:0016043 GO:0030246																																																													
comp52355_c1_seq1 GO:0009505 GO:0005507 GO:0016023 GO:0008447 GO:0016020 GO:0055114																																																																	
comp52356_c0_seq1 GO:0009295 GO:0005739 GO:0009330 GO:0006200 GO:0006261 GO:0007059 GO:0005524 GO:0003918 GO:0005694 GO:0009507 GO:0006265																																																												
comp52357_c0_seq2 GO:0009628 GO:0004640 GO:0009507 GO:0000162																																																																			
comp52358_c0_seq3 GO:0006396 GO:0022402 GO:0009220 GO:0080008 GO:0005834 GO:0005515 GO:0000166 GO:0005634																																																															
comp52360_c0_seq1 GO:0016709 GO:0050660 GO:0019243 GO:0006744 GO:0005739 GO:0055114																																																																	
comp52361_c0_seq3 GO:0005739 GO:0006098 GO:0006364 GO:0009658 GO:0006399 GO:0009507																																																																	
comp52362_c0_seq1 GO:0009536 GO:0016020																																																																					
comp52363_c0_seq2 GO:0005829 GO:0034976 GO:0006457 GO:0051087 GO:0009408 GO:0032781 GO:0001671 GO:0009644 GO:0042542 GO:0005634																																																													
comp52365_c1_seq1 GO:0008696 GO:0047810 GO:0008153 GO:0009570 GO:0046654																																																																		
comp52368_c0_seq11 GO:0006354 GO:0003735 GO:0015934 GO:0006412 GO:0005739																																																																		
comp52369_c0_seq6 GO:0010027 GO:0003723 GO:0019252 GO:0000023 GO:0009536 GO:0000166																																																																	
comp52371_c0_seq2 GO:0043231																																																																						
comp52372_c0_seq1 GO:0005829 GO:0055114 GO:0042823 GO:0006779 GO:0008615 GO:0004729 GO:0009941 GO:0004733 GO:0009534 GO:0005576 GO:0019761 GO:0042817 GO:0010181																																																										
comp52375_c0_seq2 GO:0004725 GO:0008138 GO:0035335																																																																				
comp52376_c0_seq3 GO:0005739 GO:0055114 GO:0047545																																																																				
comp52378_c2_seq19 GO:0000256 GO:0006355 GO:0071522 GO:0016023 GO:0000023 GO:0019252 GO:0003700 GO:0043085																																																															
comp52379_c1_seq4 GO:0009987 GO:0050896 GO:0006810 GO:0005739 GO:0051087																																																																		
comp52380_c0_seq1 GO:0006952 GO:0016301 GO:0009506 GO:0005886 GO:0016310 GO:0005618 GO:0007165 GO:0032440 GO:0009507 GO:0048046 GO:0055114																																																												
comp52381_c0_seq1 GO:0009555 GO:0015693 GO:0016023 GO:0005886 GO:0055085 GO:0015095 GO:0005739																																																																
comp52383_c0_seq2 GO:0010363 GO:0043169 GO:0042973 GO:0009867 GO:0005975 GO:0006612 GO:0009863 GO:0046658 GO:0005576 GO:0005737 GO:0005634																																																												
comp52385_c0_seq1 GO:0005794 GO:0032259 GO:0005739 GO:0005886 GO:0008168																																																																		
comp52386_c0_seq2 GO:0005634																																																																						
comp52389_c0_seq2 GO:0007264 GO:0009960 GO:0000226 GO:0007021 GO:0003924 GO:0009630 GO:0009558 GO:0006886 GO:0005794 GO:0005525 GO:0009793																																																												
comp52390_c0_seq2 GO:0006810 GO:0005515 GO:0035304 GO:0009793 GO:0010207 GO:0009902 GO:0016226 GO:0009570 GO:0006569 GO:0010228 GO:0005215 GO:0009684 GO:0045893 GO:0042793 GO:0006364 GO:0048481 GO:0010027																																																						
comp52391_c1_seq1 GO:0020037 GO:0005506 GO:0009055 GO:0070330 GO:0055114 GO:0005886 GO:0019825																																																																
comp52392_c0_seq2 GO:0009987 GO:0005515																																																																					
comp52393_c0_seq2 GO:0016787																																																																						
comp52394_c0_seq2 GO:0006301 GO:0006511 GO:0009739 GO:0009910 GO:0009965 GO:0004842 GO:0005524 GO:0016567 GO:0016579 GO:0005634																																																													
comp52397_c0_seq2 GO:0005886																																																																						
comp52400_c0_seq2 GO:0019243 GO:0032259 GO:0008168 GO:0005739																																																																			
comp52401_c0_seq1 GO:0005739																																																																						
comp52402_c0_seq1 GO:0050660 GO:0016021 GO:0046577 GO:0009055 GO:0055114 GO:0006066 GO:0009409 GO:0043231																																																															
comp52403_c0_seq2 GO:0020037 GO:0046872 GO:0004601 GO:0055114 GO:0006979																																																																		
comp52405_c6_seq4 GO:0048479 GO:0010051 GO:0003677 GO:0048480 GO:0010252 GO:0046982 GO:0009740 GO:0045893 GO:0005634																																																														
comp52406_c0_seq2 GO:0009507																																																																						
comp52407_c0_seq9 GO:0009941 GO:0016020 GO:0006814																																																																				
comp52408_c0_seq2 GO:0016206 GO:0046983 GO:0032259																																																																				
comp52409_c0_seq1 GO:0010287 GO:0009941 GO:0009538 GO:0015979 GO:0009535																																																																		
comp52410_c0_seq1 GO:0016192 GO:0005737																																																																					
comp52411_c0_seq6 GO:0008026 GO:0003676 GO:0005524 GO:0009507																																																																			
comp52412_c0_seq3 GO:0004535 GO:0003676 GO:0009607 GO:0006950 GO:0005634																																																																		
comp52413_c0_seq3 GO:0006468 GO:0005739 GO:0009735 GO:0009628 GO:0004713 GO:0005524 GO:0009738 GO:0004683 GO:0005634 GO:0005886																																																													
comp52414_c0_seq1 GO:0033926 GO:0004575 GO:0008152																																																																				
comp52415_c0_seq2 GO:0005886 GO:0015171 GO:0005774 GO:0006865 GO:0016021																																																																		
comp52416_c0_seq1 GO:0016020																																																																						
comp52416_c1_seq1 GO:0006810 GO:0044464 GO:0016020 GO:0005216																																																																			
comp52417_c0_seq3 GO:0015035 GO:0006098 GO:0009853 GO:0009941 GO:0043086 GO:0043085 GO:0019252 GO:0000023 GO:0009055 GO:0008047 GO:0005618 GO:0045454 GO:0009570 GO:0006569 GO:0009684 GO:0006662 GO:0009535 GO:0006109 GO:0004857 GO:0006979 GO:0010027																																																		
comp52419_c0_seq1 GO:0032259 GO:0005576 GO:0008168																																																																				
comp52420_c1_seq3 GO:0016310 GO:0006014 GO:0009507 GO:0004747																																																																			
comp52421_c0_seq2 GO:0010218 GO:0005515 GO:0009867 GO:0016592 GO:0010114 GO:0009585 GO:0009911 GO:0050832 GO:0003713 GO:0003677 GO:0031349 GO:0045893																																																											
comp52422_c0_seq4 GO:0009507 GO:0016020 GO:0019288																																																																				
comp52423_c0_seq1 GO:0005739																																																																						
comp52424_c0_seq31 GO:0030001 GO:0015095																																																																					
comp52427_c0_seq1 GO:0006508 GO:0004197																																																																					
comp52429_c0_seq4 GO:0006979 GO:0033588 GO:0006357 GO:0010928 GO:0035265 GO:2000024 GO:0031538 GO:0071329 GO:0009737 GO:0005515 GO:0043609 GO:0008284																																																											
comp52432_c0_seq5 GO:0031348 GO:0009688 GO:0009605 GO:0009867 GO:0009862 GO:0009414 GO:0010363 GO:0009873 GO:0009734 GO:0016740 GO:0010118 GO:0006612 GO:0050832 GO:0042742 GO:0000956 GO:0043069 GO:0005737 GO:0042538 GO:0010182 GO:0009000 GO:0000303 GO:0000165 GO:0019720 GO:0030170 GO:0009409 GO:0009738 GO:0009408 GO:0008265 GO:0030151 GO:0045037 GO:0030968 GO:0018315																																							
comp52433_c0_seq1 GO:0010283 GO:0047526 GO:0009807 GO:0000166 GO:0055114																																																																		
comp52436_c0_seq1 GO:0010363 GO:0047714 GO:0008970 GO:0031348 GO:0009867 GO:0019375 GO:0042631 GO:0006612 GO:0009863 GO:0004806 GO:0009507 GO:0016036 GO:0009697																																																										
comp52437_c0_seq1 GO:0004722 GO:0009785 GO:0005634 GO:0009408 GO:0009536																																																																		
comp52440_c0_seq2 GO:0003700 GO:0043565 GO:0008270 GO:0006355																																																																			
comp52441_c0_seq1 GO:0004553 GO:0008152																																																																					
comp52442_c0_seq1 GO:0016301																																																																						
comp52444_c0_seq3 GO:0003743 GO:0006413 GO:0008270 GO:0006355 GO:0006352 GO:0000394 GO:0005737 GO:0005634 GO:0006366																																																														
comp52445_c0_seq1 GO:0005634 GO:0005509																																																																					
comp52447_c0_seq4 GO:0001510 GO:0005829 GO:0048188 GO:0009220 GO:0010582 GO:0010228 GO:0005834 GO:0000166																																																															
comp52448_c0_seq3 GO:0031348 GO:0009595 GO:0009867 GO:0009697 GO:0009862 GO:0005315 GO:0030505 GO:0010363 GO:0010310 GO:0010200 GO:0042631 GO:0015706 GO:0009624 GO:0006612 GO:0043900 GO:0050832 GO:0042742 GO:0016021 GO:0002831 GO:0000165 GO:0005351 GO:0009416 GO:0030504 GO:0055085 GO:0009535 GO:0008514																																													
comp52449_c0_seq1 GO:0005829 GO:0042393 GO:0009651 GO:0009409 GO:0009408 GO:0009617 GO:0003677 GO:0010311 GO:0030154 GO:0006096 GO:0006334 GO:0006094 GO:0009738 GO:0008283 GO:0046686 GO:0003682 GO:0005634																																																						
comp52451_c0_seq1 GO:0006597 GO:0004014 GO:0008295 GO:0009536																																																																			
comp52453_c0_seq1 GO:0006952 GO:0005488 GO:0002376 GO:0010200 GO:0050794 GO:0008152 GO:0051716																																																																
comp52454_c0_seq1 GO:0005634																																																																						
comp52455_c0_seq1 GO:0016311 GO:0003869 GO:0004674 GO:0008967 GO:0009507																																																																		
comp52457_c0_seq1 GO:0048573 GO:0005634																																																																					
comp52458_c0_seq3 GO:0016020 GO:0005739																																																																					
comp52460_c0_seq6 GO:0008800 GO:0051287 GO:0055114 GO:0009331 GO:0008270 GO:0005739 GO:0045017 GO:0048573 GO:0004367 GO:0019243 GO:0009941 GO:0005975 GO:0009627 GO:0047952 GO:0046167 GO:0046168 GO:0017001 GO:0048653 GO:0004416 GO:0008654																																																			
comp52461_c0_seq1 GO:0005739 GO:0009536																																																																					
comp52463_c0_seq9 GO:0015031 GO:0005737 GO:0007346																																																																				
comp52464_c0_seq1 GO:0050660 GO:0004499 GO:0022603 GO:0055114 GO:0050661																																																																		
comp52465_c0_seq5 GO:0048767 GO:0000105 GO:0003879 GO:0000023 GO:0000287 GO:0019252 GO:0006567 GO:0009570 GO:0019344																																																														
comp52465_c3_seq7 GO:0005634 GO:0005739																																																																					
comp52466_c0_seq2 GO:0009451 GO:0005739 GO:0009507																																																																				
comp52467_c0_seq1 GO:0009793 GO:0009507 GO:0016020 GO:0003824																																																																			
comp52469_c0_seq2 GO:0008270 GO:0003676 GO:0005622																																																																				
comp52470_c0_seq1 GO:0009416 GO:0006355 GO:0080086 GO:0009741 GO:0009606 GO:0046983 GO:0048527 GO:0009734 GO:0005634																																																														
comp52472_c0_seq2 GO:0005840 GO:0046872 GO:0003735 GO:0009055 GO:0051537 GO:0009507 GO:0006412 GO:0022900																																																															
comp52473_c1_seq2 GO:1901259 GO:0019843 GO:0043621 GO:0009737 GO:0010239 GO:0006351 GO:0009507 GO:0071842																																																															
comp52474_c0_seq3 GO:0055085 GO:0009753 GO:0009414 GO:0016021 GO:0009409 GO:0006813 GO:0030551 GO:0010200 GO:0009737 GO:0005242 GO:0015271 GO:0050832 GO:0005634																																																										
comp52475_c0_seq1 GO:0003676 GO:0005730 GO:0006915 GO:0006364 GO:0008026 GO:0009220 GO:0008380 GO:0005524																																																															
comp52477_c0_seq1 GO:0005622																																																																						
comp52478_c0_seq3 GO:0046872 GO:0006413 GO:0003743 GO:0005886																																																																			
comp52480_c0_seq1 GO:0043461 GO:0005739																																																																					
comp52481_c1_seq11 GO:0005666 GO:0009304 GO:0003899 GO:0003677 GO:0046983																																																																		
comp52482_c0_seq2 GO:0002229 GO:0019684 GO:0010103 GO:0005739 GO:0010729 GO:0009507 GO:0016020																																																																
comp52483_c0_seq9 GO:0009693 GO:0009611 GO:0009612 GO:0005794 GO:0010200 GO:0009506 GO:0005886 GO:0050832 GO:0007568 GO:0005576 GO:0007020																																																												
comp52486_c0_seq2 GO:0006857 GO:0005886 GO:0016021 GO:0005215																																																																			
comp52487_c0_seq1 GO:0010118 GO:0009753 GO:0006468 GO:0004674 GO:0009620 GO:0009611 GO:0009695 GO:0005515 GO:0009268 GO:0000166 GO:0009738 GO:0009723 GO:0019722 GO:0005886																																																									
comp52488_c0_seq1 GO:0006807 GO:0004356																																																																					
comp52488_c1_seq1 GO:0005737 GO:0004356 GO:0009399 GO:0005524 GO:0006542																																																																		
comp52489_c0_seq4 GO:0006944 GO:0019243 GO:0048193 GO:0016226 GO:0051536 GO:0005739 GO:0005198																																																																
comp52490_c0_seq3 GO:0006468 GO:0007049 GO:0004713 GO:0005524 GO:0045727 GO:0004693 GO:0005634																																																																
comp52492_c0_seq10 GO:0006412 GO:0009773 GO:0019843 GO:0006354 GO:0019288 GO:0003735 GO:0009941 GO:0005763 GO:0042254 GO:0009570 GO:0035304																																																												
comp52493_c0_seq1 GO:0016757																																																																						
comp52495_c0_seq1 GO:0005829 GO:0009507 GO:0000287 GO:0008253																																																																			
comp52497_c1_seq4 GO:0008195 GO:0005887 GO:0003993 GO:0009507 GO:0009738																																																																		
comp52498_c0_seq2 GO:0004091																																																																						
comp52499_c0_seq11 GO:0009507																																																																						
comp52500_c0_seq1 GO:0009705 GO:0005886 GO:0015706 GO:0015112																																																																			
comp52501_c0_seq1 GO:0005730 GO:0003735 GO:0022627 GO:0006412																																																																			
comp52502_c0_seq6 GO:0043231																																																																						
comp52505_c1_seq1 GO:0006546 GO:0005634 GO:0005960																																																																				
comp52506_c0_seq6 GO:0004180																																																																						
comp52507_c0_seq2 GO:0046872 GO:0019375 GO:0045892 GO:0005737 GO:0030001 GO:0016036 GO:0005634																																																																
comp52508_c0_seq1 GO:0009744 GO:0005488 GO:0009750																																																																				
comp52511_c0_seq4 GO:0016556 GO:0006424 GO:0005739 GO:0050567 GO:0005524 GO:0016740 GO:0009570																																																																
comp52512_c0_seq1 GO:0009536																																																																						
comp52513_c0_seq1 GO:0003743 GO:0006413 GO:0010048 GO:0048573 GO:0003677 GO:0009860 GO:0006352 GO:0000394 GO:0005634 GO:0006366 GO:0051090																																																												
comp52514_c1_seq1 GO:0010029 GO:0009927 GO:0000160 GO:0055114 GO:0016049 GO:0048831 GO:0009553 GO:0080036 GO:0000041 GO:0031537 GO:0051301 GO:0043424 GO:0015698 GO:0032440 GO:0005737 GO:0005634																																																							
comp52516_c0_seq2 GO:0006094 GO:0042744 GO:0019447 GO:0009693 GO:0019288 GO:0009651 GO:0009507 GO:0050897 GO:0005829 GO:0006096 GO:0008660 GO:0032880 GO:0030170 GO:0019761 GO:0046686 GO:0019148 GO:0005739																																																						
comp52517_c0_seq1 GO:0016020																																																																						
comp52518_c0_seq2 GO:0005730 GO:0005840 GO:0003723 GO:0042254																																																																			
comp52520_c0_seq2 GO:0044434																																																																						
comp52521_c0_seq3 GO:0006312 GO:0007062 GO:0007131 GO:0006302 GO:0042138 GO:0007129 GO:0045132 GO:0005739																																																															
comp52522_c0_seq1 GO:0008270 GO:0005739 GO:0016772																																																																				
comp52523_c1_seq1 GO:0009790 GO:0009693 GO:0045116 GO:0005886 GO:0006511 GO:0009733 GO:0005634 GO:0005829																																																															
comp52524_c0_seq2 GO:0043229																																																																						
comp52525_c0_seq2 GO:0016020 GO:0016023																																																																					
comp52526_c0_seq1 GO:0005739 GO:0005634 GO:0042732																																																																				
comp52527_c0_seq26 GO:0005634 GO:0009536																																																																					
comp52529_c1_seq2 GO:0003677 GO:0006355																																																																					
comp52531_c0_seq6 GO:0009978 GO:0031407 GO:0009753 GO:0055114 GO:0009620 GO:0005739 GO:0009611 GO:0009941 GO:0016705 GO:0009055 GO:0004497 GO:0009535 GO:0047987 GO:0010287 GO:0020037 GO:0005506																																																							
comp52533_c1_seq4 GO:0006415 GO:0007126 GO:0003747 GO:0016020 GO:0005634																																																																		
comp52534_c0_seq1 GO:0009825 GO:0046658 GO:0030247 GO:0006950 GO:0007155 GO:0009897																																																																	
comp52535_c0_seq10 GO:0004553 GO:0005975 GO:0043169 GO:0016023																																																																			
comp52536_c0_seq2 GO:0080037 GO:0046872 GO:0016337 GO:0044373 GO:0005537																																																																		
comp52537_c1_seq5 GO:0009536																																																																						
comp52538_c0_seq1 GO:0016787																																																																						
comp52539_c0_seq1 GO:0008285 GO:0016023 GO:0009507 GO:0016020 GO:0005739 GO:0010102																																																																	
comp52540_c1_seq2 GO:0004707 GO:0006468 GO:0007623 GO:0005524 GO:0004713 GO:0005515 GO:0042542 GO:0005634 GO:0000165																																																														
comp52540_c2_seq1 GO:0050896 GO:0015120 GO:0015713 GO:0016021 GO:0015712 GO:0035436 GO:0005355 GO:0009941 GO:0006863 GO:0071917 GO:0015297																																																												
comp52542_c0_seq3 GO:0008270 GO:0006355 GO:0003677																																																																				
comp52542_c1_seq1 GO:0006413 GO:0003743 GO:0009507																																																																				
comp52543_c0_seq1 GO:0005829 GO:0006281 GO:0004170 GO:0006261 GO:0006226 GO:0042802 GO:0046080 GO:0000287																																																															
comp52544_c0_seq1 GO:0044237 GO:0004605 GO:0016020 GO:0009536																																																																			
comp52547_c0_seq1 GO:0009793 GO:0005739																																																																					
comp52549_c0_seq1 GO:0046872 GO:0019243 GO:0034432 GO:0005524 GO:0009507 GO:0004081																																																																	
comp52550_c0_seq1 GO:0009640 GO:0010388 GO:0036265 GO:0016567 GO:0000085 GO:0016579 GO:0045893 GO:0005737 GO:0008176 GO:0006400 GO:0008276 GO:0016571																																																											
comp52551_c0_seq1 GO:0006468 GO:0005524 GO:0004674																																																																				
comp52551_c1_seq1 GO:0006468 GO:0005524 GO:0004674																																																																				
comp52551_c2_seq1 GO:0016310 GO:0004674 GO:0000166																																																																				
comp52552_c0_seq2 GO:0010027 GO:0010264 GO:0006098 GO:0009507																																																																			
comp52553_c0_seq3 GO:0046872 GO:0005743 GO:0016491 GO:0007585 GO:0070469 GO:0016021 GO:0022900																																																																
comp52554_c0_seq2 GO:0004553 GO:0006073 GO:0048046 GO:0005618 GO:0016762																																																																		
comp52555_c0_seq1 GO:0016787 GO:0008152																																																																					
comp52556_c0_seq1 GO:0009524 GO:0090435 GO:0005515 GO:0005635 GO:0005819 GO:0005783																																																																	
comp52557_c0_seq1 GO:0008131 GO:0048364 GO:0016575 GO:0051568 GO:0005634																																																																		
comp52561_c1_seq1 GO:0031348 GO:0009615 GO:0009867 GO:0035304 GO:0009862 GO:0000166 GO:0060148 GO:0010363 GO:0003968 GO:0010310 GO:0006355 GO:0009617 GO:0006612 GO:0003676 GO:0000165 GO:0010025 GO:0005634																																																						
comp52562_c0_seq2 GO:0005634 GO:0005732																																																																					
comp52564_c0_seq2 GO:0009737																																																																						
comp52565_c0_seq2 GO:0005737 GO:0005506 GO:0019310 GO:0006949 GO:0050113 GO:0055114																																																																	
comp52567_c0_seq5 GO:0055114 GO:0017004 GO:0043234 GO:0005743 GO:0019243 GO:0016491 GO:0005515 GO:0009790																																																															
comp52568_c0_seq1 GO:0055114 GO:0010090 GO:0000015 GO:0009986 GO:0016491 GO:0000287 GO:0006096 GO:0009570 GO:0004634																																																														
comp52569_c0_seq1 GO:0005739																																																																						
comp52570_c0_seq1 GO:0005622																																																																						
comp52571_c0_seq17 GO:0006268 GO:0048573 GO:0003917 GO:0009536 GO:0005694 GO:0005576 GO:0006265																																																																
comp52572_c0_seq1 GO:0043572 GO:0005515 GO:0031359																																																																				
comp52573_c0_seq2 GO:0005739																																																																						
comp52574_c0_seq18 GO:0005737 GO:0048573 GO:0032259 GO:0008168 GO:0006487																																																																		
comp52575_c0_seq2 GO:0009911 GO:0048573 GO:0016926 GO:0046777 GO:0043090 GO:0004674 GO:0050665 GO:0006888 GO:0050794 GO:0005634 GO:0005524																																																												
comp52576_c2_seq1 GO:0046872 GO:0006355																																																																					
comp52577_c1_seq1 GO:0005975 GO:0035251 GO:0044237																																																																				
comp52578_c0_seq3 GO:0009753 GO:0009751 GO:0003677 GO:0045491 GO:0045893 GO:2000652																																																																	
comp52580_c0_seq1 GO:0016491 GO:0000166 GO:0055114 GO:0009536																																																																			
comp52581_c0_seq2 GO:0051788 GO:0005515 GO:0043161 GO:0016020 GO:0006891 GO:0006944 GO:0009507 GO:0015446 GO:0006820 GO:0071722 GO:0006200 GO:0005524 GO:0043248																																																										
comp52582_c0_seq2 GO:0006661																																																																						
comp52583_c1_seq2 GO:0009507																																																																						
comp52584_c0_seq2 GO:0009416 GO:0004871 GO:0007165																																																																				
comp52585_c0_seq1 GO:0016021 GO:0006857 GO:0009624 GO:0005886 GO:0005215																																																																		
comp52587_c0_seq1 GO:0043247 GO:0009150 GO:0010332 GO:0007131 GO:0045492 GO:0045132 GO:0006355 GO:0042138 GO:0006396 GO:0047627 GO:0006790 GO:0032204 GO:0010413 GO:0003700 GO:0007062 GO:0005634																																																							
comp52588_c0_seq1 GO:0007010 GO:0006094 GO:0005515 GO:0005773 GO:0045298 GO:0009651 GO:0010498 GO:0005525 GO:0005618 GO:0006184 GO:0005794 GO:0005730 GO:0005874 GO:0051258 GO:0046686 GO:0003924 GO:0007018 GO:0005886 GO:0005200																																																				
comp52590_c0_seq1 GO:0009626 GO:0046658 GO:0009817 GO:0005515 GO:0009816																																																																		
comp52591_c0_seq2 GO:0008076 GO:0005249 GO:0051260 GO:0006813 GO:0005634																																																																		
comp52592_c0_seq2 GO:0006457 GO:0009644 GO:0034976 GO:0042542 GO:0005829 GO:0009408 GO:0009880																																																																
comp52593_c0_seq1 GO:0017118																																																																						
comp52594_c0_seq1 GO:0031425 GO:0005739 GO:0009507																																																																				
comp52595_c0_seq5 GO:0009507																																																																						
comp52596_c0_seq2 GO:0010181 GO:0016491 GO:0055114 GO:0045735																																																																			
comp52597_c0_seq3 GO:0035194 GO:0006355 GO:0050896 GO:0044434 GO:0006396																																																																		
comp52598_c0_seq1 GO:0030834 GO:0030427 GO:0000226 GO:0017157 GO:0010119 GO:0051650 GO:0032794 GO:0009734 GO:0005525 GO:0009524 GO:0006184 GO:0004767 GO:0030833 GO:0005730 GO:0005819 GO:0007264 GO:0009416 GO:0045177 GO:0003924 GO:0005886 GO:0009860																																																		
comp52599_c0_seq5 GO:0046686 GO:0009507 GO:0005634 GO:0004805 GO:0005992																																																																		
comp52601_c0_seq2 GO:0005739																																																																						
comp52602_c0_seq5 GO:0005737 GO:0006979 GO:0006952 GO:0009987 GO:0050789																																																																		
comp52603_c0_seq1 GO:0005488																																																																						
comp52604_c0_seq2 GO:0016874 GO:0046872 GO:0044267 GO:0043229																																																																			
comp52605_c0_seq1 GO:0008076 GO:0005249 GO:0051260 GO:0006813 GO:0005634																																																																		
comp52606_c0_seq2 GO:0009987 GO:0050789 GO:0043170																																																																				
comp52607_c0_seq4 GO:0006301 GO:0048767 GO:0009750 GO:0005739 GO:0009651 GO:0051087 GO:0006816 GO:0006833 GO:0030003																																																														
comp52608_c0_seq1 GO:0006468 GO:0005524 GO:0004713 GO:0009860 GO:0005737 GO:0009827																																																																	
comp52609_c1_seq2 GO:0044262 GO:0005886 GO:0004459 GO:0009737 GO:0006096 GO:0005829 GO:0009651 GO:0000166 GO:0055114																																																														
comp52610_c0_seq2 GO:0010075 GO:0042545 GO:0009664 GO:0031225 GO:0051707 GO:0048653 GO:0005576																																																																
comp52611_c0_seq1 GO:0050896																																																																						
comp52613_c0_seq1 GO:0009744 GO:0010224 GO:0009718 GO:0080044 GO:0080043 GO:0051555 GO:0080046																																																																
comp52614_c2_seq7 GO:0050896 GO:0044260 GO:0090304 GO:0005634																																																																			
comp52616_c0_seq3 GO:0042802 GO:0009505 GO:0004252 GO:0048359 GO:0080001 GO:0006508 GO:0043086 GO:0048046																																																															
comp52617_c0_seq4 GO:0010150 GO:0010264 GO:0034599 GO:0009507 GO:0072593 GO:0010228																																																																	
comp52618_c0_seq1 GO:0016023 GO:0005634																																																																					
comp52619_c0_seq1 GO:0000085 GO:0009880 GO:0050826 GO:0005515 GO:0007131 GO:0016579 GO:0006461 GO:0010638 GO:0033044 GO:0016571 GO:0009651 GO:0048825 GO:0051301 GO:0010388 GO:0009640 GO:0006972 GO:0005829 GO:0010564 GO:0019915 GO:0010182 GO:0010090 GO:0016567 GO:0008180 GO:0009845 GO:0000502 GO:0010228 GO:0045595 GO:0048366 GO:0045893 GO:0009646 GO:0009909 GO:0007062 GO:0010072 GO:0010162																																					
comp52621_c0_seq3 GO:0006833 GO:0009793 GO:0009853 GO:0048573 GO:0001887 GO:0010114 GO:0010155 GO:0048481 GO:0019761 GO:0000103 GO:0009684 GO:0043085 GO:0009570 GO:0008878 GO:0006098 GO:0005829 GO:0016126 GO:0006096 GO:0009651 GO:0009266 GO:0009644 GO:0042742 GO:0006569 GO:0010027 GO:0019252 GO:0009744 GO:0000023 GO:0030931 GO:0010218 GO:0009637 GO:0005886 GO:0005739 GO:0016226 GO:0070206 GO:0006972 GO:0046686 GO:0048046 GO:0007030 GO:0004781 GO:0006094 GO:0009970 GO:0019288																													
comp52623_c0_seq8 GO:0015706 GO:0010167 GO:0006807 GO:0060776 GO:0005634																																																																		
comp52625_c0_seq2 GO:0006952 GO:0016491 GO:0009506 GO:0005886 GO:0005618 GO:0007165 GO:0008152 GO:0009507 GO:0048046																																																														
comp52627_c0_seq2 GO:0005829 GO:0016829 GO:0009536 GO:0010306 GO:0042819 GO:0019294 GO:0008676																																																																
comp52630_c0_seq1 GO:0010389 GO:0016458 GO:0009909 GO:0048449 GO:0051567 GO:0016023 GO:0006270 GO:0000166 GO:0008283 GO:0006275 GO:0006306																																																												
comp52632_c0_seq1 GO:0005829 GO:0007264 GO:0000139 GO:0009506 GO:0032940 GO:0006891 GO:0005768 GO:0005774 GO:0006944 GO:0005515 GO:0005802 GO:0016787 GO:0015031 GO:0005525 GO:0005886																																																								
comp52634_c0_seq1 GO:0016798																																																																						
comp52635_c0_seq1 GO:0016310 GO:0004672																																																																					
comp52635_c1_seq3 GO:0009987 GO:0016301																																																																					
comp52637_c0_seq2 GO:0009987 GO:0005622																																																																					
comp52639_c0_seq6 GO:0009793 GO:0009507																																																																					
comp52640_c0_seq2 GO:0006810 GO:0016126 GO:0019252 GO:0000023 GO:0016021 GO:0006970 GO:0016651 GO:0000293 GO:0019761 GO:0055114 GO:0019745 GO:0005886 GO:0005488 GO:0005739																																																									
comp52641_c0_seq3 GO:0016491 GO:0019752 GO:0016829 GO:0000166																																																																			
comp52643_c0_seq1 GO:0009414 GO:0009644 GO:0009409 GO:0016051 GO:0009737 GO:0042542 GO:0006012 GO:0047216 GO:0009408 GO:0009651																																																													
comp52644_c0_seq3 GO:0005886 GO:0055085 GO:0016021 GO:0005215																																																																			
comp52645_c0_seq7 GO:0003700 GO:0003677 GO:0046983 GO:0005634 GO:0006355																																																																		
comp52646_c0_seq2 GO:0005524 GO:0000186 GO:0004709 GO:0010260 GO:0005634 GO:0000165																																																																	
comp52647_c1_seq2 GO:0005829 GO:0006511 GO:0016049 GO:0006623 GO:0009651 GO:0051788 GO:0000902 GO:0080129 GO:0009266 GO:0006972 GO:0006833 GO:0007030 GO:0006096 GO:0007033 GO:0048193 GO:0009853 GO:0009507 GO:0046686 GO:0005794 GO:0005783 GO:0005525 GO:0005886																																																	
comp52648_c0_seq1 GO:0005739 GO:0006461																																																																					
comp52649_c0_seq2 GO:0005737 GO:0003677 GO:0004003 GO:0005524 GO:0008568																																																																		
comp52650_c0_seq2 GO:0009507																																																																						
comp52651_c0_seq3 GO:0010207 GO:0009570 GO:0005739																																																																				
comp52652_c0_seq1 GO:0005737 GO:0000166 GO:0003723																																																																				
comp52652_c1_seq3 GO:0005634																																																																						
comp52652_c3_seq1 GO:0030246 GO:0006346 GO:0010048 GO:0007267 GO:0016023 GO:0004713 GO:0010050 GO:0009855 GO:0010051 GO:0006468 GO:0009887 GO:0010014 GO:0035196 GO:0010267 GO:0048439 GO:0005886 GO:0010073 GO:0005524 GO:0009616																																																				
comp52654_c0_seq1 GO:0000293 GO:0022900 GO:0006511 GO:0008137 GO:0005747 GO:0009651 GO:0016021 GO:0050897 GO:0051788 GO:0080129 GO:0009055 GO:0006972 GO:0009631 GO:0006833 GO:0007030 GO:0050660 GO:0006096 GO:0009853 GO:0046686 GO:0005506 GO:0005886																																																		
comp52656_c0_seq1 GO:0071704 GO:0009639 GO:0010467 GO:0009507 GO:0034645 GO:0044238 GO:0044446 GO:0005488 GO:0005634																																																														
comp52657_c0_seq3 GO:0009086 GO:0047220 GO:0005739 GO:0016021 GO:0006486 GO:0000394 GO:0005794																																																																
comp52658_c0_seq8 GO:0044424 GO:0003676 GO:0000166																																																																				
comp52659_c0_seq8 GO:0005634 GO:0006260																																																																					
comp52660_c0_seq1 GO:0005886 GO:0006857 GO:0005215																																																																				
comp52662_c0_seq2 GO:0006260 GO:0003697 GO:0005739																																																																				
comp52664_c0_seq2 GO:0004568 GO:0005615 GO:0000272 GO:0043169 GO:0006032																																																																		
comp52666_c0_seq1 GO:0005737 GO:0005856 GO:0010075 GO:0006909 GO:0010014 GO:0009944 GO:0009855																																																																
comp52668_c0_seq3 GO:0008017 GO:0006468 GO:0009506 GO:0005524 GO:0004697 GO:0000914 GO:0005886 GO:0009793 GO:0010342																																																														
comp52671_c0_seq1 GO:0006626 GO:0005634																																																																					
comp52672_c0_seq1 GO:0019375 GO:0045892 GO:0005634 GO:0080040 GO:0006817																																																																		
comp52673_c0_seq1 GO:0000085 GO:0007010 GO:0006094 GO:0006457 GO:0016020 GO:0009220 GO:0001510 GO:0010498 GO:0010388 GO:0009640 GO:0005829 GO:0051082 GO:0009506 GO:0009909 GO:0034968 GO:0005524																																																							
comp52674_c0_seq1 GO:0005840 GO:0003735 GO:0006414																																																																				
comp52674_c1_seq3 GO:0005634																																																																						
comp52675_c0_seq1 GO:0006952 GO:0043531																																																																					
comp52676_c0_seq4 GO:0005507 GO:0052716 GO:0055114 GO:0015706 GO:0008447 GO:0010106 GO:0010228 GO:0006826 GO:0046688 GO:0010167 GO:0046274 GO:0048046																																																											
comp52677_c0_seq2 GO:0000278 GO:0016458 GO:0019219 GO:0045736 GO:0000279 GO:0006996 GO:0030332 GO:2000112 GO:0005634 GO:0006260																																																													
comp52678_c0_seq1 GO:0005739																																																																						
comp52681_c0_seq3 GO:0005886																																																																						
comp52682_c0_seq2 GO:0006629 GO:0006071 GO:0009536 GO:0008889 GO:0046686 GO:0016036 GO:0030643 GO:0047395 GO:0006817																																																														
comp52683_c0_seq1 GO:0051567 GO:0009944 GO:0009855 GO:0006342 GO:0010051 GO:0007169 GO:0006468 GO:0004674 GO:0009887 GO:0010014 GO:0048439 GO:0005886 GO:0010073 GO:0005524																																																									
comp52684_c0_seq3 GO:0016174 GO:0000293 GO:0005886 GO:0005506 GO:0009767 GO:0016021 GO:0009507 GO:0005634 GO:0009416																																																														
comp52685_c1_seq1 GO:0046872 GO:0051266 GO:0019354 GO:0006979 GO:0009236 GO:0016852 GO:0009507																																																																
comp52687_c0_seq1 GO:0006007 GO:0005783 GO:0005794 GO:0005634 GO:0016740																																																																		
comp52688_c0_seq3 GO:0006541 GO:0016787 GO:0005794 GO:0005634																																																																			
comp52691_c0_seq21 GO:0009793 GO:0005739																																																																					
comp52693_c0_seq1 GO:0015078 GO:0006623 GO:0009651 GO:0033179 GO:0006661 GO:0006944 GO:0006816 GO:0007030 GO:0048193 GO:0015991 GO:0005773 GO:0016787																																																											
comp52694_c0_seq6 GO:0005802 GO:0005794 GO:0005768 GO:0016760 GO:0005515 GO:0005886																																																																	
comp52695_c0_seq4 GO:0006355 GO:0003677 GO:0046983 GO:0003700 GO:0005634																																																																		
comp52696_c0_seq2 GO:0005739 GO:0009507 GO:0016757																																																																				
comp52697_c0_seq9 GO:0009805 GO:0009750 GO:0009651 GO:0009611 GO:0006541 GO:0046900 GO:0006833 GO:0005576 GO:0005773 GO:0046686 GO:0034722																																																												
comp52698_c0_seq2 GO:0044249 GO:0050789 GO:0044238																																																																				
comp52699_c0_seq11 GO:0006098 GO:0010207 GO:0009543																																																																				
comp52700_c0_seq1 GO:0031930 GO:0010019 GO:0003677 GO:0009507																																																																			
comp52700_c1_seq3 GO:0009941 GO:0006979 GO:0005794 GO:0009506 GO:0005886 GO:0005778 GO:0020037 GO:0005774 GO:0016688 GO:0005829 GO:0005739 GO:0055114																																																											
comp52701_c0_seq2 GO:0006661 GO:0009507																																																																					
comp52702_c0_seq3 GO:0009987 GO:0055114 GO:0050616 GO:0016705 GO:0009055 GO:0004497 GO:0016023 GO:0020037 GO:0005506																																																														
comp52703_c0_seq2 GO:0030246 GO:0009570 GO:0006012 GO:0004034 GO:0016556 GO:0048046																																																																	
comp52705_c0_seq7 GO:0046872																																																																						
comp52706_c0_seq1 GO:0043231																																																																						
comp52707_c0_seq2 GO:0080030 GO:0008152 GO:0005739 GO:0080032 GO:0080031 GO:0004091 GO:0050253																																																																
comp52709_c0_seq1 GO:0009825 GO:0010411 GO:0048767 GO:0035252 GO:0016021 GO:0009932 GO:0071555 GO:0016758 GO:0005768 GO:0010200 GO:0043481 GO:0010817 GO:0005515 GO:0005802 GO:0033843 GO:0019761 GO:0009969 GO:0005794 GO:0009612																																																				
comp52709_c1_seq2 GO:0048767 GO:0005739 GO:0035252 GO:0016021 GO:0016758 GO:0033843 GO:0009969																																																																
comp52711_c0_seq2 GO:0046686 GO:0005739																																																																					
comp52712_c1_seq2 GO:0016301 GO:0005524 GO:0016773 GO:0016310 GO:0006139																																																																		
comp52713_c1_seq1 GO:0004715 GO:0005886 GO:0006468 GO:0005524 GO:0009507 GO:0005634 GO:0004674																																																																
comp52714_c0_seq1 GO:0048868 GO:0006979 GO:0005829 GO:0005739 GO:0009651 GO:0006099 GO:0004333 GO:0042128 GO:0005515 GO:0045239 GO:0006106																																																												
comp52715_c0_seq2 GO:0005576 GO:0030246 GO:0005886 GO:0005975 GO:0016829																																																																		
comp52716_c0_seq1 GO:0009934 GO:0000086 GO:0005515 GO:0016020 GO:0005634 GO:0051301																																																																	
comp52718_c0_seq1 GO:0005975 GO:0043169 GO:0010200 GO:0009506 GO:0016023 GO:0042973 GO:0005618 GO:0005576																																																															
comp52719_c0_seq3 GO:0051219																																																																						
comp52720_c0_seq2 GO:0048196 GO:0010143 GO:0006970 GO:0010115 GO:0005737																																																																		
comp52721_c0_seq1 GO:0072488 GO:0015398 GO:0009624 GO:0015695 GO:0009506 GO:0005886 GO:0015843 GO:0016021 GO:0005576																																																														
comp52722_c0_seq2 GO:0009684 GO:0006779 GO:0004853 GO:0006569 GO:0009570 GO:0046686																																																																	
comp52723_c0_seq4 GO:0009695 GO:0009611 GO:0031225 GO:0005774																																																																			
comp52724_c0_seq1 GO:0010287 GO:0033306 GO:0004144 GO:0019432 GO:0005739																																																																		
comp52725_c0_seq4 GO:0043247 GO:0031048 GO:0010332 GO:0007131 GO:0032504 GO:0045132 GO:0048453 GO:0042138 GO:0048451 GO:0032204 GO:0004518 GO:0007129 GO:0007062																																																										
comp52726_c0_seq1 GO:0005774 GO:0051788 GO:0009853 GO:0005515 GO:0006833 GO:0019252 GO:0009651 GO:0016740 GO:0080129 GO:0009507 GO:0006972 GO:0006511 GO:0004089 GO:0007030 GO:0005747 GO:0006096 GO:0010228 GO:0046686 GO:0009737 GO:0009266 GO:0005886																																																		
comp52728_c0_seq3 GO:0009506 GO:0046183 GO:0003939 GO:0008270 GO:0005829 GO:0000166 GO:0055114																																																																
comp52729_c0_seq3 GO:0009867 GO:2000033 GO:0009938 GO:0006355 GO:0042538 GO:0010187 GO:0009737 GO:0009863 GO:0005634 GO:0009723 GO:0040029																																																												
comp52730_c0_seq1 GO:0005515 GO:0005680 GO:0051510 GO:0009560 GO:0051302 GO:0032875 GO:0031347 GO:0030071 GO:0042991																																																														
comp52732_c0_seq4 GO:0005634 GO:0006810 GO:0005886																																																																				
comp52733_c0_seq1 GO:0005856 GO:0006909																																																																					
comp52734_c0_seq1 GO:0005576 GO:0016023 GO:0005773 GO:0004185 GO:0006508																																																																		
comp52735_c0_seq3 GO:0010189 GO:0030170 GO:0004838 GO:0033855 GO:0006520 GO:0080130 GO:0006826 GO:0009536																																																															
comp52737_c0_seq13 GO:0010264 GO:0010207 GO:0009570																																																																				
comp52738_c0_seq2 GO:0005634																																																																						
comp52739_c0_seq1 GO:0004672 GO:0016310																																																																					
comp52742_c0_seq15 GO:0030095 GO:0019898 GO:0016556 GO:0005509 GO:0010207 GO:0019344 GO:0009654 GO:0009543																																																															
comp52744_c0_seq1 GO:0005488 GO:0016791 GO:0044424																																																																				
comp52745_c0_seq1 GO:0009560 GO:0006468 GO:0055114 GO:0004674 GO:0016021 GO:0007169 GO:0016023 GO:0005524 GO:0032440 GO:0005886																																																													
comp52746_c0_seq5 GO:0007155 GO:0045010 GO:0006268 GO:0006265 GO:0048449 GO:0003918 GO:0003002 GO:0010090 GO:0006396 GO:0009330 GO:0005694 GO:0042023 GO:0042802 GO:0045893 GO:0009741 GO:0043687 GO:0005634 GO:0005524																																																					
comp52747_c0_seq1 GO:0016020 GO:0005794																																																																					
comp52748_c0_seq1 GO:0005777 GO:0003987 GO:0005739 GO:0009850																																																																			
comp52749_c0_seq1 GO:0005576 GO:0004091 GO:0009570 GO:0006629																																																																			
comp52751_c0_seq1 GO:0016020																																																																						
comp52752_c0_seq1 GO:0005634																																																																						
comp52753_c1_seq1 GO:0003700 GO:0003677 GO:0006333 GO:0005634																																																																			
comp52754_c0_seq3 GO:0008195 GO:0006651 GO:0047874 GO:0008474 GO:0048868 GO:0006464 GO:0009507 GO:0016020																																																															
comp52755_c0_seq1 GO:0003964 GO:0006278 GO:0003723 GO:0006397 GO:0005739																																																																		
comp52755_c1_seq1 GO:0016021 GO:0005739 GO:0055114 GO:0008137																																																																			
comp52755_c2_seq1 GO:0003735 GO:0015935 GO:0009507 GO:0006412 GO:0019843 GO:0005739																																																																	
comp52756_c0_seq1 GO:0005768 GO:0005525 GO:0009504 GO:0005886 GO:0016787 GO:0005634 GO:0007264 GO:0015031																																																															
comp52756_c1_seq1 GO:0005525 GO:0005886 GO:0032456 GO:0007264 GO:0019900																																																																		
comp52758_c1_seq6 GO:0097159 GO:1901363																																																																					
comp52759_c0_seq1 GO:0005576																																																																						
comp52760_c0_seq1 GO:0006355 GO:0005515 GO:0009641																																																																				
comp52761_c0_seq1 GO:0044238 GO:0004672 GO:0044260 GO:0044699 GO:0000166 GO:0016310 GO:0050794 GO:0007154																																																															
comp52763_c0_seq1 GO:0007010 GO:0006094 GO:0005515 GO:0005773 GO:0045298 GO:0009651 GO:0010498 GO:0005525 GO:0005618 GO:0006184 GO:0005794 GO:0005730 GO:0005874 GO:0051258 GO:0046686 GO:0003924 GO:0007018 GO:0005886 GO:0005200																																																				
comp52763_c1_seq1 GO:0007018 GO:0005525 GO:0051258 GO:0005198 GO:0005874																																																																		
comp52764_c0_seq3 GO:0016592																																																																						
comp52765_c0_seq2 GO:0006635 GO:0009793 GO:0046459 GO:0006623 GO:0016558 GO:0050832 GO:0009507 GO:0003997 GO:0005777 GO:0005829 GO:0009846 GO:0007030 GO:0016192 GO:0000407 GO:0000045 GO:0044265 GO:0005634 GO:0005739																																																					
comp52767_c1_seq10 GO:0005634 GO:0005886																																																																					
comp52768_c0_seq6 GO:0005737																																																																						
comp52769_c0_seq2 GO:0042742 GO:0010337 GO:0010310 GO:0004190 GO:0048046																																																																		
comp52770_c0_seq1 GO:0031072 GO:0009958 GO:0042594 GO:0006623 GO:0006457 GO:0009660 GO:0009536 GO:0051301 GO:0005774 GO:0005770 GO:0009959 GO:0005802 GO:0007033 GO:0006897 GO:0007032 GO:0005794 GO:0005783 GO:0005634 GO:0005886 GO:0009793																																																			
comp52771_c0_seq1 GO:0009909 GO:0048449 GO:0003677 GO:0042221 GO:0005515 GO:0003700 GO:0050794 GO:0048438																																																															
comp52775_c0_seq1 GO:0016036 GO:0051788 GO:0006635 GO:0019375 GO:0043161 GO:0042631 GO:0009407 GO:0080129 GO:0045892 GO:0004842 GO:0016567 GO:0006301 GO:0005634																																																										
comp52776_c0_seq2 GO:0031348 GO:0007243 GO:0005515 GO:0050254 GO:0009873 GO:0043407 GO:0005576 GO:0005794 GO:0005829 GO:0035335 GO:0030244 GO:0000303 GO:0048193 GO:0008219 GO:0005783 GO:0009863 GO:0005886 GO:0005634 GO:0033550																																																				
comp52777_c0_seq1 GO:0006457 GO:0000413 GO:0003755																																																																				
comp52778_c0_seq2 GO:0006944 GO:0009506 GO:0005886 GO:0008565 GO:0016192 GO:0009507																																																																	
comp52779_c0_seq2 GO:0009414 GO:0005525 GO:0009961 GO:0005886 GO:0016787 GO:0009737 GO:0009631 GO:0007264 GO:0015031																																																														
comp52780_c0_seq3 GO:0016023 GO:0016021 GO:0009507																																																																				
comp52782_c0_seq1 GO:0016567 GO:0006511 GO:0005524 GO:0004842 GO:0005634																																																																		
comp52783_c0_seq1 GO:0005515 GO:0034434 GO:0016127																																																																				
comp52784_c0_seq1 GO:0012505 GO:0005886 GO:0030118 GO:0006810																																																																			
comp52786_c0_seq1 GO:0051287 GO:0055114 GO:0016616																																																																				
comp52787_c0_seq4 GO:0008233 GO:0005524 GO:0008568 GO:0006508 GO:0005739																																																																		
comp52788_c0_seq3 GO:0009414 GO:0010143 GO:0043565 GO:0003700 GO:0010166 GO:0006351 GO:0009873																																																																
comp52790_c1_seq1 GO:0004528 GO:0005773 GO:0009086 GO:0000394 GO:0009117 GO:0005634 GO:0009536																																																																
comp52791_c0_seq3 GO:0006623 GO:0007030 GO:0006944 GO:0048193 GO:0005794 GO:0007067 GO:0016021 GO:0005634 GO:0005829 GO:0007033																																																													
comp52792_c0_seq1 GO:0006979 GO:0016174 GO:0051707 GO:0015706 GO:0008219 GO:0009751 GO:0010106 GO:0004601 GO:0001561 GO:0006826 GO:0010167 GO:0020037 GO:0009830 GO:0016165 GO:0005576																																																								
comp52793_c0_seq3 GO:0009585 GO:0048573 GO:0010099 GO:0005515 GO:0048366 GO:0005634																																																																	
comp52794_c0_seq1 GO:0010413 GO:0009531 GO:0009834 GO:0005774 GO:0009808 GO:0010089 GO:0045492 GO:0009830 GO:0031225 GO:0005886																																																													
comp52795_c0_seq2 GO:0006412 GO:0005739 GO:0046872 GO:0003735 GO:0015934 GO:0006184 GO:0003924 GO:0009507 GO:0005525																																																														
comp52796_c0_seq5 GO:0003735 GO:0005886 GO:0005774 GO:0022625 GO:0009507 GO:0006412																																																																	
comp52798_c0_seq3 GO:0006468 GO:0009744 GO:0010224 GO:0009813 GO:0004672 GO:0005524 GO:0009507 GO:0005886																																																															
comp52799_c0_seq3 GO:0080179 GO:0006400 GO:0032259 GO:0008168																																																																			
comp52800_c0_seq3 GO:0005388 GO:0003684 GO:0006281 GO:0009432 GO:0009536 GO:0005524 GO:0007131 GO:0009691 GO:0003697 GO:0008094																																																													
comp52801_c0_seq1 GO:0000786 GO:0005730 GO:0003677 GO:0006334 GO:0009507																																																																		
comp52802_c0_seq2 GO:0009627 GO:0034976 GO:0003676 GO:0005634 GO:0005829 GO:0000166																																																																	
comp52803_c1_seq3 GO:0016787 GO:0008270 GO:0008152																																																																				
comp52805_c0_seq3 GO:0003723 GO:0016226 GO:0019288 GO:0010027 GO:0010228 GO:0048481 GO:0009579 GO:0000166 GO:0009570 GO:0030529 GO:0006397 GO:0009793																																																											
comp52806_c0_seq1 GO:0004252 GO:0016021																																																																					
comp52807_c0_seq1 GO:0006623 GO:0006486 GO:0008270 GO:0005829																																																																			
comp52808_c0_seq2 GO:0005737 GO:0035556 GO:0010200 GO:0009506 GO:0002679 GO:0016567 GO:0050832 GO:0004842 GO:0070696 GO:0000151																																																													
comp52809_c0_seq1 GO:0003676																																																																						
comp52810_c0_seq2 GO:0005634 GO:0005829																																																																					
comp52811_c0_seq3 GO:0006863 GO:0016020 GO:0005345 GO:0015931																																																																			
comp52812_c0_seq2 GO:0009853 GO:0008270 GO:0004550 GO:0006241 GO:0005743 GO:0009507 GO:0005794 GO:0050897 GO:0005829 GO:0006165 GO:0006183 GO:0006228 GO:0019932 GO:0005524 GO:0006979																																																								
comp52813_c1_seq5 GO:0019408 GO:0016597 GO:0009507																																																																				
comp52813_c2_seq3 GO:0004069 GO:0008270 GO:0009220 GO:0006007 GO:0005794 GO:0005829 GO:0080130 GO:0032312 GO:0030170 GO:0003677 GO:0006520 GO:0046686 GO:0005507 GO:0005634 GO:0008060 GO:0005739																																																							
comp52815_c0_seq2 GO:0004672 GO:0006468 GO:0005524																																																																				
comp52816_c0_seq3 GO:0009507 GO:0005634 GO:0005739 GO:0010228 GO:0006355																																																																		
comp52817_c0_seq2 GO:0046872 GO:0016709 GO:0019825																																																																				
comp52818_c0_seq5 GO:0009793 GO:0009507																																																																					
comp52819_c2_seq4 GO:0033554 GO:0071310 GO:0045087 GO:0016301 GO:0007165 GO:0044237 GO:0005886																																																																
comp52820_c0_seq5 GO:0009793 GO:0009507																																																																					
comp52821_c0_seq1 GO:0043161 GO:0043248 GO:0051788 GO:0006626 GO:0016023 GO:0000166 GO:0005783																																																																
comp52823_c1_seq1 GO:0005887 GO:0016023 GO:0051119 GO:0008643																																																																			
comp52824_c0_seq5 GO:0008270																																																																						
comp52825_c0_seq1 GO:0019288 GO:0004392 GO:0010024 GO:0020037 GO:0009507 GO:0006788																																																																	
comp52827_c0_seq2 GO:0009750 GO:0009630 GO:0004871 GO:0009749 GO:0009744 GO:0005834 GO:2000067 GO:0005525 GO:0006184 GO:0005737 GO:0009652 GO:0031683 GO:0001664 GO:0009737 GO:0007188 GO:0003924 GO:0005634 GO:0010555 GO:0009723																																																				
comp52828_c1_seq1 GO:0004672 GO:0016310 GO:0016020																																																																				
comp52830_c0_seq9 GO:0050660 GO:0009505 GO:0005773 GO:0006979 GO:0008762 GO:0005886 GO:0048046 GO:0005739 GO:0055114																																																														
comp52831_c0_seq1 GO:0045892 GO:0005634																																																																					
comp52832_c1_seq1 GO:0016049 GO:0006623 GO:0007264 GO:0000902 GO:0006944 GO:0006888 GO:0003924 GO:0009507 GO:0005773 GO:0005794 GO:0005525 GO:0005886																																																											
comp52833_c0_seq3 GO:0043231 GO:0044444																																																																					
comp52834_c1_seq7 GO:0005576 GO:0016020 GO:0016023 GO:0008375																																																																			
comp52836_c1_seq2 GO:0009555 GO:0005887 GO:0051119 GO:0008643 GO:0009901																																																																		
comp52837_c1_seq4 GO:0005634																																																																						
comp52838_c0_seq1 GO:0006346 GO:0005737 GO:0016246																																																																				
comp52839_c0_seq1 GO:0009536																																																																						
comp52840_c0_seq29 GO:0006351																																																																						
comp52841_c0_seq3 GO:0016021 GO:0006857 GO:0005886 GO:0005215																																																																			
comp52842_c0_seq4 GO:0015031 GO:0016021 GO:0008565 GO:0005634 GO:0005886																																																																		
comp52843_c0_seq1 GO:0005739 GO:0009536																																																																					
comp52844_c2_seq5 GO:0015079 GO:0071805 GO:0009507 GO:0016020 GO:0005634																																																																		
comp52846_c0_seq6 GO:0020037 GO:0005506 GO:0009055 GO:0009507																																																																			
comp52847_c0_seq1 GO:0005840 GO:0003735 GO:0006412																																																																				
comp52848_c0_seq2 GO:0019898 GO:0005509 GO:0006098 GO:0019288 GO:0019760 GO:0000023 GO:0019252 GO:0009570 GO:0015979 GO:0043085 GO:0009654 GO:0009543																																																											
comp52849_c0_seq3 GO:0016772																																																																						
comp52849_c1_seq3 GO:0006468 GO:0005524 GO:0005634 GO:0005829 GO:0004674 GO:0009651 GO:0080167																																																																
comp52851_c1_seq1 GO:0004385 GO:0006163 GO:0016310 GO:0005739																																																																			
comp52853_c0_seq1 GO:0005515 GO:0048438 GO:0048519 GO:0009850 GO:0006355 GO:0010050 GO:0005525 GO:0009855 GO:0006886 GO:0010051 GO:0007264 GO:0030244 GO:0048193 GO:0003677 GO:0005795 GO:0009887 GO:0046686 GO:0010158 GO:0003700 GO:0048439 GO:0005886 GO:0005634 GO:0009733 GO:0009616																																															
comp52854_c0_seq4 GO:0042547 GO:0048767 GO:0000271 GO:0009932 GO:0043481 GO:0010817 GO:0046658 GO:0030570 GO:0009814																																																														
comp52855_c0_seq1 GO:0005737 GO:0009693 GO:0016874																																																																				
comp52856_c0_seq1 GO:0005739																																																																						
comp52859_c1_seq11 GO:0005886 GO:0009536																																																																					
comp52860_c1_seq1 GO:0009506 GO:0005886 GO:0005774 GO:0006886 GO:0005483 GO:0009507																																																																	
comp52861_c0_seq2 GO:0005774 GO:0009506 GO:0005794 GO:0005886																																																																			
comp52865_c0_seq1 GO:0031348 GO:0009867 GO:0035304 GO:0009862 GO:0010363 GO:0010310 GO:0009617 GO:0006333 GO:0006612 GO:0009965 GO:0000165 GO:0003677 GO:0030154 GO:0003700 GO:0045893 GO:0005634																																																							
comp52867_c1_seq4 GO:0005773 GO:0006805 GO:0003840 GO:0016756 GO:0006751 GO:0005634 GO:0005739																																																																
comp52868_c0_seq1 GO:0009827 GO:0016020 GO:0009860 GO:0030048																																																																			
comp52869_c0_seq1 GO:0008143 GO:0000166																																																																					
comp52870_c0_seq1 GO:0009560 GO:0006606 GO:0000398 GO:0009909 GO:0006261 GO:0051604 GO:0010074 GO:0000166 GO:0006406 GO:0005634																																																													
comp52871_c0_seq1 GO:0009407 GO:0006626 GO:0010583 GO:0009055 GO:0045454 GO:0015035 GO:0005739																																																																
comp52872_c0_seq3 GO:0005634																																																																						
comp52873_c1_seq2 GO:0009941 GO:0004222 GO:0005886 GO:0005524 GO:0008568 GO:0016021 GO:0006508 GO:0008270 GO:0051301																																																														
comp52875_c0_seq1 GO:0051457 GO:0006355 GO:0043565 GO:0008356 GO:0003700 GO:0009956 GO:0009630 GO:0042803 GO:0005634																																																														
comp52877_c0_seq9 GO:0070370 GO:0005794 GO:0031072 GO:0005634 GO:0005829 GO:0048316																																																																	
comp52879_c0_seq2 GO:0055069 GO:0009941 GO:0015633 GO:0009642 GO:0006816 GO:0004008 GO:0016021 GO:0006878 GO:0046872 GO:0006754 GO:0015434 GO:0005388 GO:0009636 GO:0005886 GO:0016463 GO:0005524																																																							
comp52880_c0_seq1 GO:0005634 GO:0004091																																																																					
comp52881_c0_seq3 GO:0009823 GO:0055114 GO:0010103 GO:0048507 GO:0019139 GO:0016614 GO:0010382 GO:0010089 GO:0005576 GO:0005773																																																													
comp52882_c0_seq1 GO:0048767 GO:0009932 GO:0009506 GO:0005768 GO:0046658 GO:0005802 GO:0048527 GO:0005783 GO:0005794																																																														
comp52883_c0_seq1 GO:0010264 GO:0010207 GO:0016787 GO:0009507																																																																			
comp52884_c0_seq1 GO:0006863 GO:0016021 GO:0005337 GO:0015864 GO:0005886																																																																		
comp52885_c1_seq3 GO:0005829 GO:0048040 GO:0000139 GO:0042732 GO:0019305 GO:0005768 GO:0005774 GO:0000166 GO:0005802 GO:0050662 GO:0005886 GO:0008460																																																											
comp52886_c1_seq1 GO:0043247 GO:0010413 GO:0010332 GO:0004004 GO:0045132 GO:0003676 GO:0042138 GO:0005524 GO:0007062 GO:0045492 GO:0007131 GO:0032204 GO:0005634																																																										
comp52888_c0_seq6 GO:0055114 GO:0005739 GO:0005730 GO:0006355 GO:0006606 GO:0003677 GO:0006508 GO:0032440 GO:0006406 GO:0004252 GO:0009507																																																												
comp52890_c0_seq3 GO:0008536 GO:0005634 GO:0003677																																																																				
comp52892_c0_seq2 GO:0006346 GO:0007267 GO:0009855 GO:0003677 GO:0010014 GO:0035196 GO:0010267 GO:0004003 GO:0010073 GO:0005634 GO:0005524 GO:0009616 GO:0005739																																																										
comp52893_c0_seq6 GO:0005515																																																																						
comp52894_c0_seq4 GO:0003712 GO:0005739 GO:0006355																																																																				
comp52897_c0_seq1 GO:0009505 GO:0009506 GO:0005886 GO:0009821 GO:0009507 GO:0005783 GO:0016844																																																																
comp52898_c0_seq2 GO:0005737 GO:0045431 GO:0051555 GO:0055114																																																																			
comp52899_c0_seq4 GO:0005507 GO:0009862 GO:0004069 GO:0005739 GO:0080130 GO:0010285 GO:0033362 GO:0009570 GO:0030170																																																														
comp52900_c0_seq7 GO:0031418 GO:0005506 GO:0016706 GO:0005634 GO:0055114 GO:0009536																																																																	
comp52901_c1_seq2 GO:0005768 GO:0016757 GO:0005794 GO:0016023 GO:0009616 GO:0009507 GO:0010050 GO:0005802 GO:0005739																																																														
comp52902_c0_seq6 GO:0005234 GO:0010118 GO:0006883 GO:0030288 GO:0004970 GO:0016021 GO:0009416 GO:0005217 GO:0004930 GO:0006811 GO:0006874 GO:0035235 GO:0005576 GO:0030007																																																									
comp52903_c0_seq1 GO:0009693 GO:0016887 GO:0005886 GO:0005524																																																																			
comp52904_c0_seq1 GO:0000910 GO:0005737 GO:0007021																																																																				
comp52905_c0_seq1 GO:0007267 GO:0006275 GO:0016020 GO:0051567 GO:0043231 GO:0010389 GO:0008283 GO:0048453 GO:0006342 GO:0006306 GO:0048451 GO:0009555 GO:0019722 GO:0035196 GO:0010267 GO:0009909 GO:0009616																																																						
comp52906_c0_seq19 GO:0003700 GO:0045892 GO:0005634																																																																				
comp52907_c0_seq1 GO:0005739																																																																						
comp52908_c0_seq3 GO:0007126 GO:0048449 GO:0000724 GO:0048438																																																																			
comp52909_c0_seq5 GO:0005802 GO:0005576 GO:0005794 GO:0005768																																																																			
comp52910_c0_seq2 GO:0000256 GO:0004038 GO:0050897 GO:0016023 GO:0010136 GO:0008270 GO:0005783 GO:0006995																																																															
comp52911_c0_seq1 GO:0005886 GO:0034480																																																																					
comp52912_c0_seq1 GO:0043229 GO:0006364 GO:0006606 GO:0009909 GO:0032040 GO:0006406																																																																	
comp52913_c0_seq1 GO:0009788 GO:0006468 GO:0005524 GO:0004683																																																																			
comp52914_c0_seq1 GO:0000226 GO:0006346 GO:0031048 GO:0000911 GO:0051567 GO:0048453 GO:0046872 GO:0048451 GO:0003824																																																														
comp52917_c0_seq1 GO:0016706																																																																						
comp52918_c0_seq4 GO:0005739 GO:0009570																																																																					
comp52919_c0_seq1 GO:0005829 GO:0055114 GO:0003868 GO:0005739 GO:0046872 GO:0010189 GO:0006559 GO:0016117 GO:0042802 GO:0010236 GO:0006572 GO:0009507																																																											
comp52920_c0_seq10 GO:0097159 GO:1901363																																																																					
comp52921_c0_seq29 GO:0034440 GO:0009611 GO:0009695 GO:1900366 GO:0016165 GO:0009507 GO:0010386 GO:0005506																																																															
comp52922_c0_seq1 GO:0007155 GO:0016023 GO:0006406 GO:0009944 GO:0016570 GO:0045010 GO:0004672 GO:0010082 GO:0009855 GO:0048449 GO:0009965 GO:0010090 GO:0006468 GO:0010074 GO:0048765 GO:0010014 GO:0033612 GO:0009909 GO:0005886 GO:0005524 GO:0019900 GO:0048481 GO:0071555																																																
comp52923_c0_seq3 GO:0006468 GO:0005509 GO:0009651 GO:0010359 GO:0010119 GO:0005524 GO:0009738 GO:0005773 GO:0004683 GO:0005886																																																													
comp52924_c0_seq2 GO:0009684 GO:0004175 GO:0006508 GO:0006569 GO:0005886																																																																		
comp52926_c0_seq3 GO:0006073 GO:0048046 GO:0008810 GO:0005618 GO:0016762																																																																		
comp52927_c0_seq19 GO:0016023 GO:0016021 GO:0055085																																																																				
comp52928_c0_seq1 GO:0005737 GO:0016747																																																																					
comp52929_c0_seq1 GO:0005886																																																																						
comp52930_c0_seq1 GO:0005829 GO:0005777 GO:0000166 GO:0055114 GO:0008270 GO:0003960																																																																	
comp52931_c0_seq3 GO:0009753 GO:0043231 GO:0009651 GO:0044260 GO:0009751 GO:0090304 GO:0009733 GO:0009723 GO:0046686																																																														
comp52933_c0_seq6 GO:0008536																																																																						
comp52934_c0_seq6 GO:0009941 GO:0009793 GO:0010207 GO:0009658 GO:0019867 GO:0005739																																																																	
comp52935_c0_seq1 GO:0009506 GO:0009628 GO:0006950 GO:0044267 GO:0016020 GO:0005829																																																																	
comp52936_c0_seq1 GO:0005576 GO:0004185 GO:0005618 GO:0006508																																																																			
comp52938_c0_seq1 GO:0010026 GO:0005829 GO:0006623 GO:0042732 GO:0051567 GO:0016197 GO:0006944 GO:0010482 GO:0005515 GO:0048765 GO:0009507 GO:0005634																																																											
comp52939_c0_seq1 GO:0010021 GO:0043169 GO:0019156 GO:0000023 GO:0009507 GO:0019761 GO:0004556 GO:0043085																																																															
comp52941_c0_seq1 GO:0003676 GO:0005737 GO:0004527																																																																				
comp52942_c0_seq2 GO:0006944 GO:0009644 GO:0048193 GO:0005771 GO:0010200 GO:0005515 GO:0000815 GO:0042542 GO:0015031																																																														
comp52943_c0_seq1 GO:0019243 GO:0004089 GO:0015976 GO:0009507 GO:0008270																																																																		
comp52944_c0_seq6 GO:0005739																																																																						
comp52945_c0_seq2 GO:0009639 GO:0005634 GO:0008270																																																																				
comp52946_c0_seq1 GO:0010468 GO:0003723 GO:0009658 GO:0000373 GO:0009507 GO:0008270 GO:0015979 GO:0005739																																																															
comp52947_c0_seq1 GO:0005739																																																																						
comp52948_c0_seq9 GO:0009507																																																																						
comp52949_c0_seq17 GO:0003676 GO:0008408 GO:0005634 GO:0006139																																																																			
comp52950_c0_seq1 GO:0016798 GO:0008152 GO:0043169																																																																				
comp52951_c0_seq1 GO:0030505 GO:0055085 GO:0030504 GO:0006098 GO:0016021 GO:0009416 GO:0005315 GO:0008514 GO:0009579 GO:0009706 GO:0009624																																																												
comp52953_c0_seq1 GO:0009982 GO:0016798 GO:0003723 GO:0001522 GO:0004730																																																																		
comp52954_c0_seq1 GO:0005622																																																																						
comp52955_c0_seq2 GO:0016491 GO:0006508 GO:0008234																																																																				
comp52956_c0_seq3 GO:0005840 GO:0003735 GO:0006412																																																																				
comp52957_c0_seq1 GO:0009860																																																																						
comp52958_c0_seq1 GO:0003700 GO:0003677 GO:0046983 GO:0005634 GO:0006355																																																																		
comp52960_c0_seq1 GO:0006301 GO:0008565 GO:0030125 GO:0005739 GO:0006886 GO:0005794																																																																	
comp52961_c0_seq5 GO:0016888 GO:0005634																																																																					
comp52962_c0_seq1 GO:0008152 GO:0000166 GO:0016207																																																																				
comp52963_c0_seq5 GO:0051567 GO:0003896 GO:0006269 GO:0005658 GO:0008283 GO:0006306																																																																	
comp52964_c0_seq2 GO:0006184 GO:0000287 GO:0003924 GO:0005525																																																																			
comp52966_c0_seq2 GO:0006944 GO:0006891 GO:0005794 GO:0006890 GO:0016021 GO:0005801 GO:0005783 GO:0005739																																																															
comp52967_c1_seq3 GO:0005634																																																																						
comp52968_c0_seq1 GO:0010103 GO:0005739 GO:0016226 GO:0010027 GO:0010228 GO:0048481 GO:0009507 GO:0045893 GO:0009793																																																														
comp52969_c0_seq1 GO:0016020 GO:0005739																																																																					
comp52971_c0_seq1 GO:0009165 GO:0009536																																																																					
comp52973_c0_seq2 GO:0006468 GO:0005524 GO:0004674																																																																				
comp52974_c0_seq1 GO:0050625 GO:0005829 GO:0055114 GO:0009506 GO:0005774 GO:0009733 GO:0003960 GO:0006970 GO:0005576 GO:0045892 GO:0046686 GO:0010181 GO:0005886																																																										
comp52974_c1_seq2 GO:0016132 GO:0030176 GO:0005794 GO:0009918 GO:0005886 GO:0005515 GO:0006084 GO:0047598 GO:0005634 GO:0016126 GO:0055114																																																												
comp52976_c0_seq3 GO:0005774 GO:0008143 GO:0005634 GO:0000166 GO:0005515																																																																		
comp52977_c0_seq2 GO:0005774 GO:0005654 GO:0005515 GO:0009414 GO:0009507 GO:0005576 GO:0005794 GO:0000786 GO:0005730 GO:0005829 GO:0045653 GO:0048015 GO:0003677 GO:0000723 GO:0009579 GO:0009506 GO:0034080 GO:0005886 GO:0005739																																																				
comp52978_c0_seq2 GO:0003677 GO:0009410 GO:0009555 GO:0030968 GO:0045893 GO:0005634																																																																	
comp52981_c1_seq4 GO:0003700 GO:0003676 GO:0005634 GO:0008270																																																																			
comp52983_c0_seq2 GO:0015450 GO:0015171 GO:0031359 GO:0005744 GO:0015031																																																																		
comp52986_c0_seq2 GO:0005634 GO:0016020																																																																					
comp52988_c0_seq1 GO:0005730 GO:0022626 GO:0003735 GO:0005886 GO:0009507 GO:0006412																																																																	
comp52991_c0_seq1 GO:2000652 GO:0005634																																																																					
comp52992_c0_seq1 GO:0042802 GO:0009505 GO:0004252 GO:0032440 GO:0005576 GO:0006508 GO:0043086 GO:0055114																																																															
comp52994_c0_seq5 GO:0051721 GO:0006098 GO:0019760 GO:0004407 GO:0019252 GO:0019288 GO:0042903 GO:0043621 GO:0016575 GO:0000023 GO:0009507 GO:0016556 GO:0005829 GO:0043014 GO:0090042 GO:0048487 GO:0005634 GO:0010027																																																					
comp52995_c0_seq2 GO:0051536 GO:0006098 GO:0016226 GO:0009570 GO:0045893 GO:0005506 GO:0009073																																																																
comp52996_c0_seq1 GO:0008171																																																																						
comp52997_c0_seq10 GO:0006098 GO:0019288 GO:0000023 GO:0019252 GO:0010207 GO:0009507 GO:0019761 GO:0016020 GO:0003955																																																														
comp52999_c0_seq2 GO:0043231 GO:0044444																																																																					
comp53000_c0_seq8 GO:0003676 GO:0005634 GO:0009536 GO:0008859																																																																			
comp53001_c0_seq1 GO:0050253 GO:0080031 GO:0004091 GO:0080032 GO:0080030																																																																		
comp53002_c0_seq6 GO:0016192 GO:0005634																																																																					
comp53002_c1_seq1 GO:0006007 GO:0048767 GO:0009651 GO:0006816 GO:0046961 GO:0007030 GO:0000220 GO:0009507 GO:0015992 GO:0005886																																																													
comp53005_c2_seq2 GO:0006355 GO:0005667 GO:0044699 GO:0003677 GO:0003700																																																																		
comp53006_c0_seq1 GO:0009220 GO:0005739																																																																					
comp53007_c0_seq4 GO:0031348 GO:0008752 GO:0006635 GO:0008270 GO:0009867 GO:0009697 GO:0006833 GO:0009862 GO:0000166 GO:0010363 GO:0010310 GO:0016045 GO:0010200 GO:0003955 GO:0009651 GO:0015706 GO:0016747 GO:0043900 GO:0006612 GO:0050832 GO:0042742 GO:0006972 GO:0005777 GO:0005829 GO:0002831 GO:0007030 GO:0006096 GO:0000165 GO:0009570 GO:0010167 GO:0046686 GO:0009266 GO:0005886 GO:0006979 GO:0005739																																				
comp53008_c0_seq1 GO:0005739 GO:0009507																																																																					
comp53009_c0_seq1 GO:0030170 GO:0004124 GO:0048573 GO:0006535 GO:0016740																																																																		
comp53010_c0_seq2 GO:0005507 GO:0004129 GO:0005751 GO:0009651 GO:0009060 GO:0009535 GO:0006123																																																																
comp53012_c0_seq2 GO:0020037 GO:0046872 GO:0009505 GO:0004601 GO:0055114 GO:0006979																																																																	
comp53013_c0_seq1 GO:0006511 GO:0048767 GO:0006869 GO:0004842 GO:0005515 GO:0005634																																																																	
comp53014_c0_seq1 GO:0005829 GO:0000103 GO:0008270 GO:0009506 GO:0048573 GO:0009755 GO:0071291 GO:0008430 GO:0046686 GO:0042542 GO:0005634																																																												
comp53015_c0_seq5 GO:0005634																																																																						
comp53016_c1_seq2 GO:0030170 GO:0010264 GO:0006744 GO:0009536																																																																			
comp53017_c0_seq1 GO:0009536																																																																						
comp53018_c1_seq11 GO:0044424																																																																						
comp53020_c0_seq2 GO:0009982 GO:0019243 GO:0003723 GO:0005634 GO:0031119																																																																		
comp53021_c0_seq1 GO:0045132 GO:0008270 GO:0006259 GO:0033044 GO:0003677 GO:0005524 GO:0007062 GO:0004386 GO:0031048 GO:0005634																																																													
comp53022_c0_seq3 GO:0010048 GO:0010541 GO:0016021 GO:0043481 GO:0010329 GO:0010540 GO:0010315 GO:0008559 GO:0055085 GO:0006200 GO:0005886 GO:0015440 GO:0005634 GO:0005524 GO:0048440																																																								
comp53023_c0_seq3 GO:0046417 GO:0004106 GO:0009073 GO:0009507 GO:0005829																																																																		
comp53024_c0_seq2 GO:0004222 GO:0005739 GO:0006508 GO:0008270 GO:0009507																																																																		
comp53027_c0_seq1 GO:0005576 GO:0005886																																																																					
comp53029_c0_seq3 GO:0052726 GO:0047325 GO:0010264 GO:0005524 GO:0000287 GO:0052725 GO:0005829 GO:0032957 GO:0052746 GO:0005739																																																													
comp53030_c0_seq3 GO:0030139 GO:0009965 GO:0048439 GO:0010051 GO:0035091 GO:0048765 GO:0048519 GO:0030140 GO:0008060 GO:0016772 GO:0005829 GO:0022402 GO:0016049 GO:0033044 GO:0048449 GO:0010090 GO:0010014 GO:0009733 GO:0010089 GO:0048868 GO:0005886 GO:0032312 GO:0045595 GO:0008270 GO:0006897 GO:0005515 GO:0048610 GO:0045010 GO:0007155 GO:0048589 GO:0009855 GO:0009944 GO:0071555																																						
comp53031_c0_seq1 GO:0005488																																																																						
comp53033_c0_seq1 GO:0016757 GO:0005794 GO:0048868 GO:0016023 GO:0010197 GO:0009507																																																																	
comp235240_c0_seq1 GO:0001501 GO:0042744 GO:0007243 GO:0005515 GO:0019430 GO:0008379 GO:0006916 GO:0005634 GO:0005739																																																														
comp235280_c0_seq1 GO:0043169																																																																						
comp235294_c0_seq1 GO:0033993 GO:0005829 GO:0005764 GO:0007049 GO:0042623 GO:0006813 GO:0032367 GO:0008022 GO:0006200 GO:0031902 GO:0016044 GO:0051301 GO:0005774 GO:0005769 GO:0005524 GO:0007032 GO:0015031 GO:0005634 GO:0032510																																																				
comp235431_c0_seq1 GO:0005840 GO:0005739																																																																					
comp235692_c0_seq1 GO:0016772																																																																						
comp235767_c0_seq1 GO:0005840																																																																						
comp235854_c0_seq1 GO:0005886 GO:0042127																																																																					
comp235931_c0_seq1 GO:0003676 GO:0008270 GO:0006351																																																																				
comp236074_c0_seq1 GO:0003677																																																																						
comp236931_c0_seq1 GO:0009755																																																																						
comp236945_c0_seq1 GO:0008152 GO:0005739 GO:0004165																																																																				
comp237280_c0_seq1 GO:0016363 GO:0005730 GO:0005686 GO:0000398 GO:0016607 GO:0003677 GO:0005515 GO:0003700 GO:0045893 GO:0005689																																																													
comp237538_c0_seq1 GO:0007595 GO:0004673 GO:0030027 GO:0002762 GO:0043066 GO:0004550 GO:0006241 GO:0043015 GO:0005525 GO:0005882 GO:0005829 GO:0008285 GO:0006165 GO:0001726 GO:0042802 GO:0005813 GO:0045618 GO:0015949 GO:0006183 GO:0006897 GO:0000287 GO:0006228 GO:0042493 GO:0051591 GO:0050679 GO:0004536 GO:0048471 GO:0007399 GO:0043388 GO:0005886 GO:0005634 GO:0005524 GO:0005739																																						
comp237541_c0_seq1 GO:0005488																																																																						
comp237727_c0_seq1 GO:0004622																																																																						
comp237923_c0_seq1 GO:0005761 GO:0003735 GO:0006412																																																																				
comp238094_c0_seq1 GO:0005840 GO:0005739																																																																					
comp238167_c0_seq1 GO:0006855 GO:0016020 GO:0015297 GO:0015238																																																																			
comp238377_c0_seq1 GO:0005524																																																																						
comp238401_c0_seq1 GO:0005083																																																																						
comp238575_c0_seq1 GO:0006413 GO:0005829 GO:0010494 GO:0000289 GO:0008494 GO:0006378 GO:0000398 GO:0008022 GO:0048255 GO:2000623 GO:0045727 GO:0008143 GO:0000166 GO:0071013																																																									
comp238624_c0_seq1 GO:0016787 GO:0006541																																																																					
comp238654_c0_seq1 GO:0048367																																																																						
comp238730_c0_seq1 GO:0003735 GO:0003723 GO:0015934 GO:0006412																																																																			
comp238857_c0_seq1 GO:0005576 GO:0005886																																																																					
comp239170_c0_seq1 GO:0009835 GO:0015238 GO:0005886 GO:0006855 GO:0005774 GO:0015297																																																																	
comp239173_c0_seq1 GO:0005840 GO:0046872 GO:0003735 GO:0006412																																																																			
comp239284_c0_seq1 GO:0016020																																																																						
comp240249_c0_seq1 GO:0001968 GO:0008610 GO:0010811 GO:0005518 GO:0031012 GO:0008201 GO:0030198																																																																
comp240352_c0_seq1 GO:0003729 GO:0071011 GO:0001745 GO:0006376 GO:0005700 GO:0000381 GO:0005515 GO:0007067 GO:0000166 GO:0071013 GO:0035062 GO:0035327																																																											
comp240365_c0_seq1 GO:0005762 GO:0003735 GO:0006412																																																																				
comp240884_c0_seq1 GO:0005515 GO:0022613																																																																					
comp240978_c0_seq1 GO:0000209 GO:0005654 GO:0005515 GO:0006521 GO:0051437 GO:0042981 GO:0010467 GO:0016032 GO:0051436 GO:0005730 GO:0005829 GO:0002479 GO:0000084 GO:0000502 GO:0000216 GO:0016887 GO:0031145 GO:0006200 GO:0016071 GO:0006977 GO:0005739																																																		
comp241017_c0_seq1 GO:0005509
[truncated: 1,852,630 more chars]
