# Supplementary material for: De Novo Assembly and Characterization of Sophora japonica Transcriptome Using RNA-seq
Source: Biomed Res Int. 2014 Jan 2;2014:750961. doi: 10.1155/2014/750961 (PMC3910276; doi:10.1155/2014/750961)
Supplement: Supplementary file 1 — Additional file1: Information of unigenes expression in S. japonica. Additional file2: DNA sequences of all unigenes in S. japonica. Additional file3: Potential protein coding sequences of all unigenes in S. japonica. Additional file4: Quality score distribution across all bases. Additional file5: Quality score distribution over all sequences. Additional file6: Distribution of unigenes mapped to the speciesshown by pie graph. Additional file7: Detailed information for GO classification of unigenes in S. japonica. Additional file8: COG functional classification list of unigenes in S. japonica. Additional file9: Detailed information for unignenes mapping KEGG pathway in S. japonica. Additional file10: Illustration of the whole network of unigenes in S. japonica. Additional file11: Protein-protein interactions of unigenes in S. japonica. [file 750961.f1.zip › 750961.f1/Additional file/Additional file8 COG_list_use.txt]

comp51358_c0_seq2	U
comp58805_c1_seq2	F
comp51471_c0_seq1	E
comp43843_c0_seq1	O
comp35689_c1_seq1	V
comp55714_c0_seq1	R
comp51681_c0_seq3	E
comp59880_c0_seq8	U
comp47899_c0_seq1	E
comp56684_c2_seq7	L
comp53016_c1_seq2	R
comp57657_c0_seq1	I
comp19395_c0_seq1	V
comp57815_c0_seq7	L
comp50798_c0_seq1	O
comp30887_c0_seq1	K
comp56772_c2_seq2	L
comp48564_c1_seq1	S
comp49748_c0_seq4	Q
comp400268_c0_seq1	P
comp51569_c0_seq2	F
comp51120_c0_seq1	V
comp47918_c0_seq1	H
comp51797_c0_seq1	L
comp37659_c0_seq3	R
comp48939_c0_seq2	T
comp45230_c0_seq2	E
comp59141_c0_seq15	E
comp39498_c0_seq1	J
comp59319_c0_seq7	L
comp128456_c0_seq1	R
comp54404_c0_seq2	J
comp47233_c0_seq1	E
comp56825_c0_seq2	L
comp58195_c0_seq3	H
comp53669_c0_seq4	P
comp26550_c0_seq1	O
comp45187_c0_seq3	S
comp16532_c0_seq1	J
comp247771_c0_seq1	U
comp237727_c0_seq1	R
comp59091_c1_seq47	H
comp59091_c1_seq47	R
comp53528_c0_seq1	S
comp200539_c0_seq1	O
comp55075_c1_seq2	O
comp8782_c0_seq1	R
comp55582_c0_seq5	G
comp51851_c0_seq2	U
comp57813_c0_seq2	R
comp54921_c0_seq3	V
comp52402_c0_seq1	E
comp31302_c0_seq1	J
comp490954_c0_seq1	S
comp38349_c0_seq1	M
comp57337_c0_seq8	G
comp32918_c0_seq1	J
comp44038_c0_seq3	C
comp49105_c0_seq1	M
comp44085_c0_seq1	R
comp44085_c0_seq1	A
comp55566_c0_seq2	S
comp50241_c0_seq3	H
comp17868_c1_seq1	G
comp234868_c0_seq1	J
comp12412_c0_seq1	C
comp58302_c0_seq20	S
comp17704_c0_seq1	L
comp14236_c0_seq1	K
comp58220_c2_seq5	J
comp280941_c0_seq1	G
comp276227_c0_seq1	J
comp52707_c0_seq2	I
comp50083_c0_seq1	R
comp350806_c0_seq1	J
comp49856_c0_seq1	R
comp43621_c0_seq1	C
comp58053_c1_seq5	C
comp45568_c0_seq1	Q
comp32845_c0_seq1	T
comp41284_c0_seq1	J
comp54601_c0_seq2	L
comp33947_c0_seq1	C
comp58706_c0_seq4	O
comp130811_c0_seq1	J
comp263456_c0_seq1	H
comp57753_c0_seq3	P
comp41456_c1_seq1	R
comp41181_c0_seq1	O
comp53118_c1_seq3	J
comp57984_c0_seq3	E
comp14589_c0_seq1	M
comp55390_c0_seq1	R
comp50271_c0_seq13	I
comp58280_c0_seq2	C
comp46510_c0_seq1	F
comp22992_c1_seq1	E
comp51570_c0_seq1	R
comp57416_c0_seq4	L
comp47741_c1_seq2	H
comp44267_c0_seq1	L
comp64494_c0_seq1	J
comp51013_c1_seq4	I
comp58826_c0_seq12	P
comp59672_c0_seq2	H
comp19091_c0_seq1	E
comp59772_c1_seq2	L
comp58517_c0_seq2	U
comp52869_c0_seq1	R
comp46463_c0_seq1	J
comp58209_c2_seq2	R
comp57249_c0_seq3	Q
comp28137_c0_seq1	R
comp51625_c0_seq3	G
comp41829_c1_seq1	H
comp55250_c0_seq1	S
comp46296_c0_seq1	J
comp48523_c1_seq1	O
comp439896_c0_seq1	J
comp49251_c0_seq3	L
comp24447_c0_seq1	O
comp55497_c1_seq1	C
comp294314_c0_seq1	S
comp52994_c0_seq5	L
comp630_c0_seq1	V
comp35501_c0_seq1	E
comp53650_c0_seq2	J
comp44845_c1_seq1	O
comp44435_c0_seq1	J
comp37776_c0_seq1	O
comp56868_c0_seq51	R
comp49786_c0_seq1	C
comp57031_c0_seq1	L
comp55095_c1_seq1	V
comp47137_c2_seq1	J
comp58276_c1_seq15	H
comp59846_c0_seq4	L
comp57132_c0_seq3	L
comp55035_c0_seq1	R
comp53127_c0_seq3	Q
comp55456_c2_seq5	L
comp55255_c0_seq1	G
comp232367_c0_seq1	V
comp54822_c0_seq29	J
comp59408_c0_seq1	G
comp54540_c0_seq2	L
comp54376_c0_seq2	P
comp50574_c0_seq1	J
comp51975_c0_seq1	O
comp50871_c0_seq1	H
comp54311_c1_seq8	L
comp289279_c0_seq1	G
comp54711_c1_seq2	H
comp49018_c1_seq2	J
comp59734_c0_seq7	L
comp58500_c1_seq6	I
comp58205_c0_seq2	G
comp54798_c0_seq1	O
comp57550_c0_seq1	L
comp48175_c0_seq3	O
comp52786_c0_seq1	F
comp56823_c0_seq14	R
comp49779_c0_seq1	J
comp54828_c0_seq6	R
comp41994_c0_seq1	O
comp41559_c0_seq1	R
comp53767_c0_seq2	J
comp57094_c0_seq1	Q
comp40489_c0_seq1	H
comp232168_c0_seq1	O
comp31853_c0_seq1	L
comp75902_c0_seq1	J
comp27940_c0_seq1	R
comp51256_c0_seq4	U
comp42076_c1_seq1	J
comp46077_c0_seq1	R
comp58313_c0_seq3	L
comp37445_c2_seq1	C
comp44810_c0_seq2	C
comp52317_c0_seq1	G
comp51009_c0_seq1	O
comp59758_c0_seq6	L
comp54970_c0_seq2	I
comp48879_c0_seq1	J
comp53858_c0_seq4	S
comp38897_c0_seq1	J
comp165805_c0_seq1	J
comp53155_c0_seq3	R
comp47834_c0_seq1	R
comp48973_c0_seq1	R
comp41935_c1_seq1	C
comp52571_c0_seq17	L
comp51011_c0_seq2	R
comp37702_c0_seq2	E
comp53777_c0_seq4	M
comp53606_c0_seq1	S
comp50850_c0_seq1	E
comp50687_c0_seq1	R
comp1047_c0_seq1	L
comp51519_c0_seq4	S
comp44251_c0_seq1	C
comp51666_c0_seq5	Q
comp47846_c0_seq1	C
comp54665_c0_seq2	S
comp58067_c0_seq2	E
comp59699_c1_seq1	H
comp46271_c1_seq1	C
comp10546_c0_seq1	R
comp27600_c0_seq2	C
comp18124_c1_seq1	V
comp624673_c0_seq1	E
comp624673_c0_seq1	R
comp349590_c0_seq1	O
comp44252_c0_seq1	J
comp59736_c0_seq1	U
comp50877_c0_seq1	I
comp58438_c0_seq2	L
comp58289_c0_seq1	H
comp55594_c2_seq1	J
comp60011_c0_seq4	H
comp55186_c0_seq10	J
comp57599_c1_seq22	M
comp55423_c0_seq1	J
comp50954_c0_seq1	E
comp46820_c0_seq1	R
comp49971_c0_seq1	Q
comp23816_c0_seq1	L
comp14056_c0_seq1	J
comp56802_c0_seq1	O
comp485315_c0_seq1	F
comp45524_c0_seq3	R
comp52081_c0_seq1	E
comp40074_c0_seq1	O
comp23519_c0_seq1	E
comp54191_c1_seq1	R
comp56051_c0_seq4	L
comp58101_c0_seq6	E
comp55264_c0_seq3	G
comp53510_c0_seq1	A
comp46784_c0_seq4	T
comp46784_c0_seq4	R
comp59869_c0_seq3	L
comp56994_c0_seq6	R
comp59425_c0_seq5	V
comp39629_c0_seq3	U
comp56149_c0_seq1	R
comp52049_c0_seq1	R
comp58514_c0_seq5	L
comp59273_c2_seq1	S
comp58052_c0_seq2	E
comp49863_c1_seq3	E
comp59042_c1_seq1	L
comp43767_c0_seq1	E
comp147619_c0_seq1	V
comp58164_c0_seq1	H
comp56875_c2_seq3	G
comp5551_c0_seq1	R
comp56966_c0_seq6	R
comp48504_c0_seq1	O
comp148_c0_seq1	F
comp58145_c0_seq1	E
comp41083_c0_seq1	J
comp53486_c0_seq1	M
comp53486_c0_seq1	O
comp48338_c1_seq1	P
comp96767_c0_seq1	C
comp19868_c0_seq1	O
comp58304_c0_seq5	E
comp56270_c0_seq1	P
comp30477_c0_seq1	J
comp42502_c0_seq1	J
comp55586_c0_seq1	U
comp54597_c0_seq1	R
comp48633_c1_seq2	G
comp42302_c1_seq1	R
comp56409_c0_seq12	L
comp56409_c0_seq12	J
comp44124_c0_seq1	V
comp47995_c1_seq1	I
comp59017_c0_seq3	O
comp53103_c0_seq1	R
comp53662_c0_seq1	L
comp46057_c0_seq1	E
comp356679_c0_seq1	J
comp58269_c0_seq1	L
comp33234_c0_seq1	R
comp36120_c0_seq1	O
comp42514_c0_seq1	H
comp59444_c1_seq4	I
comp49169_c0_seq1	I
comp58193_c2_seq1	C
comp46210_c0_seq9	P
comp51598_c0_seq1	K
comp54773_c0_seq1	L
comp46172_c0_seq1	R
comp59545_c3_seq2	E
comp57810_c0_seq15	T
comp37254_c0_seq1	J
comp57756_c0_seq1	L
comp53513_c0_seq3	O
comp59963_c0_seq8	L
comp59595_c0_seq18	S
comp54352_c0_seq2	K
comp54305_c0_seq4	L
comp235280_c0_seq1	R
comp31314_c0_seq1	L
comp41283_c0_seq1	G
comp56277_c1_seq1	F
comp52237_c0_seq1	R
comp40031_c1_seq2	G
comp52475_c0_seq1	I
comp59999_c0_seq4	L
comp59999_c0_seq4	R
comp46711_c0_seq3	K
comp251_c0_seq1	Q
comp51174_c0_seq1	F
comp156632_c0_seq1	J
comp35133_c0_seq1	G
comp59670_c1_seq1	R
comp54378_c0_seq3	R
comp49937_c0_seq1	G
comp58599_c1_seq42	R
comp49225_c0_seq2	R
comp48556_c0_seq1	S
comp54221_c0_seq1	M
comp49153_c0_seq1	L
comp60132_c0_seq3	V
comp52790_c1_seq1	R
comp52420_c1_seq3	G
comp43026_c0_seq1	J
comp50720_c0_seq2	I
comp52211_c0_seq2	L
comp6634_c0_seq1	E
comp56199_c2_seq3	R
comp59354_c0_seq7	J
comp56706_c0_seq2	M
comp59241_c0_seq3	R
comp45373_c0_seq5	H
comp40952_c0_seq1	P
comp52256_c0_seq1	S
comp26316_c0_seq1	H
comp49152_c1_seq2	E
comp54188_c1_seq3	L
comp18257_c0_seq1	Q
comp49592_c0_seq1	Q
comp50149_c2_seq4	R
comp4306_c0_seq1	M
comp56540_c0_seq2	H
comp47931_c0_seq1	M
comp38239_c0_seq1	R
comp56985_c0_seq1	U
comp50499_c0_seq1	H
comp18611_c0_seq1	P
comp59315_c1_seq1	L
comp44245_c0_seq1	E
comp59448_c2_seq1	O
comp53335_c0_seq5	P
comp57812_c0_seq18	L
comp48168_c1_seq3	O
comp56871_c0_seq11	E
comp59010_c0_seq3	L
comp58215_c1_seq2	T
comp57474_c0_seq1	Q
comp50743_c0_seq3	J
comp14887_c0_seq1	F
comp58405_c0_seq9	R
comp348625_c0_seq1	O
comp51774_c0_seq1	P
comp55335_c0_seq2	E
comp44166_c0_seq1	G
comp44632_c1_seq1	R
comp25664_c0_seq1	U
comp404895_c0_seq1	H
comp42563_c0_seq1	V
comp58049_c0_seq1	G
comp282748_c0_seq1	I
comp544154_c0_seq1	G
comp193318_c0_seq1	Q
comp51602_c0_seq1	Q
comp37929_c1_seq1	H
comp284673_c0_seq1	O
comp57592_c0_seq4	L
comp53470_c0_seq2	J
comp88281_c0_seq1	J
comp289887_c0_seq1	P
comp31469_c0_seq1	M
comp122823_c0_seq1	J
comp56219_c0_seq2	H
comp54463_c1_seq2	L
comp54564_c0_seq3	L
comp225792_c0_seq1	J
comp43834_c0_seq1	C
comp55402_c2_seq1	J
comp49889_c0_seq2	O
comp57768_c0_seq5	I
comp57702_c0_seq3	R
comp50362_c0_seq1	J
comp55157_c0_seq10	L
comp18125_c0_seq1	G
comp51824_c0_seq1	Q
comp50948_c0_seq1	J
comp37578_c0_seq1	M
comp108924_c0_seq1	J
comp41902_c1_seq1	C
comp60118_c1_seq12	R
comp33800_c0_seq1	J
comp43771_c0_seq1	O
comp54308_c0_seq7	R
comp14406_c0_seq1	O
comp55135_c0_seq2	L
comp49416_c0_seq1	J
comp46101_c0_seq2	J
comp44148_c0_seq3	R
comp54293_c1_seq3	V
comp236705_c0_seq1	F
comp236705_c0_seq1	R
comp52800_c0_seq3	L
comp50115_c0_seq3	V
comp3564_c0_seq1	J
comp5088_c0_seq1	J
comp54644_c0_seq1	K
comp356667_c0_seq1	I
comp44769_c0_seq1	F
comp34682_c0_seq1	J
comp52644_c0_seq3	H
comp57676_c1_seq3	O
comp59435_c1_seq9	O
comp46528_c0_seq2	S
comp53234_c0_seq1	Q
comp14493_c0_seq1	R
comp134094_c0_seq1	J
comp4207_c0_seq1	C
comp358569_c0_seq1	F
comp358569_c0_seq1	R
comp32523_c1_seq1	F
comp54336_c0_seq8	O
comp47478_c0_seq3	J
comp57757_c0_seq3	J
comp55905_c0_seq1	R
comp59628_c0_seq3	S
comp59628_c0_seq3	L
comp3646_c0_seq1	R
comp206129_c0_seq1	V
comp59034_c7_seq2	R
comp55544_c0_seq2	C
comp36334_c0_seq1	L
comp56989_c0_seq1	C
comp46079_c0_seq1	E
comp57838_c0_seq21	C
comp25582_c0_seq1	O
comp360391_c0_seq1	C
comp54630_c2_seq8	L
comp53466_c0_seq1	L
comp50986_c0_seq2	F
comp60074_c2_seq4	M
comp57258_c0_seq4	F
comp54510_c0_seq1	E
comp55386_c1_seq2	R
comp51730_c0_seq4	J
comp66854_c0_seq1	J
comp43349_c0_seq1	E
comp58695_c3_seq2	G
comp54687_c2_seq2	I
comp52291_c1_seq1	F
comp46445_c1_seq2	L
comp44072_c0_seq2	L
comp42829_c0_seq1	C
comp58308_c0_seq1	O
comp20074_c0_seq1	M
comp54542_c0_seq1	E
comp57244_c0_seq3	F
comp53593_c0_seq4	C
comp47718_c0_seq1	R
comp36859_c1_seq1	J
comp52890_c0_seq3	A
comp56235_c0_seq3	L
comp56767_c0_seq1	R
comp59407_c0_seq1	O
comp50410_c0_seq1	M
comp58844_c3_seq1	S
comp54867_c0_seq3	G
comp40145_c0_seq1	R
comp52176_c1_seq1	S
comp57724_c0_seq2	O
comp56247_c0_seq1	E
comp59971_c1_seq4	S
comp16613_c0_seq1	R
comp152533_c0_seq1	J
comp58036_c0_seq1	M
comp36985_c0_seq1	E
comp54584_c0_seq2	H
comp40708_c0_seq1	C
comp33457_c0_seq1	Q
comp56009_c0_seq1	L
comp57457_c0_seq2	L
comp53156_c0_seq1	I
comp58928_c0_seq1	G
comp139085_c0_seq1	C
comp59733_c0_seq8	J
comp56502_c0_seq2	L
comp49118_c0_seq1	R
comp58509_c0_seq1	F
comp58850_c0_seq6	G
comp54845_c0_seq2	T
comp59571_c1_seq2	R
comp59571_c1_seq2	E
comp58352_c0_seq2	Q
comp58352_c0_seq2	R
comp55733_c0_seq3	O
comp52575_c0_seq2	L
comp48484_c0_seq1	Q
comp42211_c0_seq1	E
comp55313_c0_seq2	G
comp275844_c0_seq1	E
comp80352_c0_seq1	E
comp56890_c0_seq8	M
comp54164_c0_seq30	R
comp53784_c0_seq1	G
comp40234_c0_seq2	Q
comp465858_c0_seq1	I
comp35175_c0_seq1	C
comp48382_c0_seq1	V
comp48246_c0_seq3	L
comp48800_c0_seq2	H
comp152794_c0_seq1	E
comp41984_c1_seq1	K
comp33824_c0_seq1	C
comp54634_c0_seq2	H
comp47792_c0_seq4	R
comp59301_c0_seq15	C
comp311959_c0_seq1	G
comp59168_c1_seq1	R
comp8549_c0_seq1	L
comp355024_c0_seq1	G
comp49618_c0_seq2	M
comp4842_c0_seq1	G
comp53106_c0_seq1	C
comp210798_c0_seq1	R
comp54666_c0_seq1	P
comp41790_c0_seq1	G
comp52048_c0_seq1	I
comp46083_c0_seq2	J
comp44041_c0_seq4	R
comp16974_c1_seq1	I
comp54518_c0_seq2	G
comp53706_c0_seq1	Q
comp56226_c0_seq2	H
comp58270_c1_seq55	L
comp52787_c0_seq4	O
comp129133_c0_seq1	R
comp57912_c3_seq1	E
comp57000_c1_seq3	R
comp57704_c0_seq3	L
comp36075_c0_seq1	E
comp57823_c0_seq2	G
comp72426_c0_seq1	J
comp55935_c0_seq1	V
comp46856_c2_seq1	R
comp380845_c0_seq1	C
comp42302_c0_seq2	R
comp44414_c0_seq5	O
comp44256_c0_seq1	J
comp52464_c0_seq1	P
comp354170_c0_seq1	L
comp26310_c0_seq1	R
comp56403_c0_seq3	R
comp57169_c0_seq8	H
comp58790_c0_seq3	G
comp316495_c0_seq1	G
comp57978_c0_seq1	Q
comp81396_c0_seq1	R
comp47962_c0_seq1	G
comp55762_c0_seq1	M
comp55765_c1_seq1	C
comp44658_c2_seq1	I
comp47786_c0_seq1	P
comp56976_c1_seq1	E
comp53919_c0_seq1	V
comp764_c0_seq1	O
comp41613_c0_seq1	J
comp55734_c0_seq55	R
comp55290_c0_seq1	M
comp40875_c0_seq2	T
comp42628_c0_seq1	I
comp57991_c1_seq1	R
comp57895_c0_seq2	G
comp45811_c0_seq1	J
comp19737_c0_seq1	V
comp54686_c1_seq1	R
comp52917_c0_seq1	R
comp362012_c0_seq1	L
comp49187_c0_seq2	O
comp183857_c0_seq1	J
comp274077_c0_seq1	K
comp57985_c0_seq2	P
comp51300_c0_seq9	R
comp50172_c1_seq1	O
comp59603_c0_seq4	L
comp201118_c0_seq1	J
comp233154_c0_seq1	H
comp233154_c0_seq1	M
comp58049_c1_seq1	O
comp37351_c1_seq1	G
comp348432_c0_seq1	E
comp16564_c0_seq1	I
comp57107_c2_seq4	J
comp58378_c0_seq2	R
comp53168_c0_seq2	R
comp58181_c1_seq4	V
comp50458_c0_seq1	P
comp53049_c0_seq2	S
comp56239_c0_seq3	P
comp59929_c0_seq2	I
comp7195_c0_seq1	O
comp57758_c1_seq15	R
comp7996_c0_seq1	I
comp59679_c1_seq90	F
comp59679_c1_seq90	G
comp56070_c0_seq14	K
comp223917_c0_seq1	E
comp59107_c0_seq7	O
comp754547_c0_seq1	L
comp58402_c1_seq1	C
comp50180_c0_seq1	J
comp56059_c1_seq12	I
comp51298_c0_seq5	J
comp1296_c0_seq1	J
comp56913_c0_seq46	J
comp58312_c0_seq3	L
comp57091_c0_seq2	M
comp54552_c0_seq1	L
comp49620_c0_seq2	H
comp255001_c0_seq1	J
comp54594_c0_seq1	R
comp115548_c0_seq1	J
comp51357_c0_seq3	O
comp59454_c0_seq3	L
comp57151_c0_seq4	L
comp55052_c0_seq31	M
comp51974_c0_seq1	E
comp45520_c0_seq1	G
comp53977_c0_seq1	G
comp25531_c0_seq1	O
comp49913_c1_seq1	L
comp59399_c0_seq20	P
comp55379_c0_seq4	R
comp571510_c0_seq1	O
comp241907_c0_seq1	F
comp58881_c0_seq6	L
comp62427_c0_seq1	K
comp53036_c0_seq2	Q
comp45846_c0_seq1	R
comp17908_c0_seq1	F
comp53748_c0_seq1	H
comp51148_c0_seq2	G
comp48403_c0_seq1	J
comp217127_c0_seq1	V
comp52391_c1_seq1	Q
comp35959_c0_seq1	P
comp43729_c0_seq1	L
comp55272_c0_seq2	L
comp101510_c0_seq1	O
comp58124_c0_seq3	L
comp58608_c0_seq2	O
comp54636_c0_seq2	S
comp59798_c2_seq6	L
comp47789_c0_seq11	O
comp52301_c0_seq2	R
comp60122_c0_seq3	O
comp60122_c0_seq3	T
comp43654_c0_seq1	R
comp59374_c0_seq8	H
comp55384_c1_seq1	R
comp16638_c0_seq1	C
comp57638_c0_seq3	O
comp59965_c0_seq6	O
comp51424_c0_seq6	K
comp50969_c2_seq2	I
comp56168_c0_seq17	R
comp54935_c0_seq1	I
comp58729_c2_seq23	H
comp349379_c0_seq1	H
comp60092_c1_seq4	L
comp55451_c0_seq1	R
comp51206_c1_seq6	K
comp42334_c0_seq1	E
comp58140_c0_seq4	S
comp58140_c0_seq4	L
comp51491_c0_seq2	M
comp53802_c0_seq1	L
comp59360_c0_seq41	P
comp52262_c0_seq1	I
comp50854_c0_seq1	S
comp59552_c2_seq13	H
comp47977_c0_seq1	O
comp44393_c0_seq2	G
comp54316_c0_seq5	O
comp481279_c0_seq1	J
comp44215_c0_seq1	I
comp46919_c0_seq3	I
comp46607_c0_seq1	Q
comp44727_c0_seq1	O
comp53976_c0_seq1	F
comp34795_c0_seq1	C
comp50380_c1_seq1	L
comp41842_c0_seq2	P
comp52480_c0_seq1	O
comp59633_c0_seq3	Q
comp57555_c0_seq2	P
comp55175_c0_seq8	R
comp51964_c0_seq3	I
comp52853_c0_seq1	R
comp54027_c1_seq31	G
comp48846_c0_seq2	J
comp16959_c0_seq1	O
comp49952_c0_seq1	S
comp49952_c0_seq1	L
comp48495_c0_seq8	T
comp48675_c1_seq1	G
comp43972_c1_seq1	L
comp59629_c0_seq6	L
comp39069_c1_seq1	G
comp43407_c1_seq1	G
comp39111_c0_seq1	E
comp55146_c0_seq1	P
comp56945_c0_seq1	L
comp55901_c0_seq24	C
comp1014_c0_seq1	O
comp51845_c0_seq13	C
comp58241_c0_seq14	O
comp58086_c0_seq4	T
comp57634_c4_seq1	O
comp52152_c0_seq3	P
comp213821_c0_seq1	P
comp319997_c0_seq1	F
comp58912_c0_seq2	P
comp36540_c0_seq1	E
comp31691_c0_seq1	L
comp45335_c0_seq1	O
comp52722_c0_seq2	H
comp54298_c1_seq1	L
comp49760_c0_seq1	L
comp42213_c0_seq1	O
comp39354_c0_seq1	U
comp38333_c0_seq1	O
comp47652_c0_seq1	I
comp47982_c0_seq3	K
comp1129_c0_seq1	C
comp60049_c0_seq3	D
comp60049_c0_seq3	L
comp35218_c0_seq1	L
comp46591_c0_seq1	I
comp51721_c0_seq1	O
comp122855_c0_seq1	J
comp295560_c0_seq1	I
comp41100_c0_seq1	R
comp56679_c2_seq6	R
comp36362_c0_seq1	O
comp58977_c1_seq2	O
comp49209_c0_seq1	J
comp45888_c0_seq1	R
comp51389_c0_seq1	J
comp57299_c0_seq6	L
comp54673_c0_seq2	O
comp48155_c1_seq1	E
comp20365_c0_seq1	O
comp328367_c0_seq1	C
comp57854_c0_seq18	L
comp58173_c0_seq9	L
comp57731_c0_seq4	R
comp44059_c0_seq1	S
comp54851_c2_seq26	C
comp47675_c0_seq1	H
comp148004_c0_seq1	H
comp33862_c0_seq1	L
comp44257_c1_seq1	O
comp52949_c0_seq17	S
comp56671_c0_seq3	C
comp41984_c0_seq1	K
comp278002_c0_seq1	M
comp278002_c0_seq1	P
comp23485_c0_seq1	E
comp59526_c0_seq1	R
comp59426_c0_seq27	G
comp2650_c0_seq1	J
comp40118_c0_seq2	L
comp47137_c0_seq1	J
comp20819_c0_seq1	E
comp59489_c1_seq1	J
comp58551_c0_seq10	G
comp51616_c0_seq3	J
comp56983_c0_seq1	L
comp55165_c0_seq3	L
comp55432_c0_seq3	O
comp50203_c0_seq3	J
comp46413_c0_seq1	Q
comp52599_c0_seq5	G
comp44994_c0_seq1	H
comp47167_c0_seq1	K
comp51564_c0_seq4	G
comp34188_c0_seq1	J
comp187525_c0_seq1	F
comp16944_c0_seq1	O
comp50969_c0_seq1	I
comp47257_c0_seq1	J
comp53519_c0_seq1	E
comp57716_c0_seq1	E
comp51972_c0_seq1	Q
comp53499_c0_seq1	L
comp47729_c0_seq3	D
comp33684_c0_seq1	J
comp39439_c0_seq1	O
comp33492_c0_seq1	C
comp56877_c0_seq3	R
comp58190_c0_seq6	O
comp51395_c0_seq3	P
comp51199_c0_seq2	F
comp31407_c2_seq1	L
comp349350_c0_seq1	F
comp59352_c0_seq8	F
comp44279_c0_seq2	M
comp59618_c0_seq7	R
comp59136_c0_seq72	E
comp58519_c1_seq1	C
comp59770_c0_seq50	L
comp53526_c1_seq3	J
comp51582_c0_seq1	P
comp51917_c0_seq1	P
comp51792_c0_seq2	J
comp349838_c0_seq1	O
comp47856_c1_seq1	R
comp33047_c0_seq1	I
comp57637_c0_seq3	G
comp48210_c1_seq1	S
comp54474_c1_seq1	L
comp28913_c0_seq1	I
comp55712_c0_seq23	J
comp215386_c0_seq1	J
comp56790_c0_seq9	R
comp51119_c0_seq1	R
comp117949_c0_seq1	L
comp56483_c0_seq8	L
comp61422_c0_seq1	O
comp49362_c0_seq28	H
comp48115_c0_seq1	G
comp37768_c0_seq1	E
comp42262_c0_seq1	C
comp46965_c1_seq1	E
comp297500_c0_seq1	J
comp55185_c0_seq1	H
comp38462_c0_seq1	G
comp34562_c0_seq1	L
comp56556_c0_seq19	L
comp50537_c0_seq1	P
comp50537_c0_seq1	E
comp597_c0_seq1	J
comp46798_c0_seq1	I
comp49951_c0_seq3	Q
comp50212_c0_seq1	L
comp57135_c0_seq1	R
comp49802_c0_seq3	M
comp36121_c0_seq1	J
comp6889_c0_seq1	J
comp235240_c0_seq1	O
comp27577_c0_seq1	G
comp4114_c0_seq1	C
comp57912_c0_seq1	P
comp55510_c0_seq2	R
comp55898_c0_seq1	L
comp33003_c1_seq2	F
comp59588_c0_seq1	S
comp59281_c0_seq1	V
comp59106_c0_seq1	F
comp50373_c0_seq1	Q
comp43979_c0_seq5	Q
comp47863_c0_seq1	E
comp56910_c0_seq4	L
comp55876_c0_seq3	L
comp51071_c0_seq2	S
comp58353_c1_seq14	V
comp2830_c0_seq1	C
comp58063_c0_seq3	R
comp59902_c0_seq2	I
comp59902_c0_seq2	G
comp53595_c0_seq1	S
comp54252_c1_seq4	R
comp52608_c0_seq1	L
comp54577_c0_seq11	L
comp53373_c1_seq2	R
comp281939_c0_seq1	C
comp158001_c0_seq1	C
comp1196_c0_seq1	P
comp33903_c0_seq1	L
comp165478_c0_seq1	R
comp57004_c0_seq6	C
comp57318_c0_seq1	P
comp57318_c0_seq1	M
comp280331_c0_seq1	C
comp45773_c0_seq2	T
comp179853_c0_seq1	S
comp54310_c0_seq2	F
comp58885_c1_seq9	E
comp54325_c0_seq1	K
comp52951_c0_seq1	H
comp290450_c0_seq1	Q
comp46409_c0_seq2	S
comp50779_c0_seq1	C
comp53310_c0_seq2	C
comp48309_c0_seq3	R
comp231970_c0_seq1	I
comp59530_c0_seq66	L
comp47449_c0_seq1	J
comp35052_c0_seq1	R
comp32464_c0_seq1	R
comp58601_c0_seq5	F
comp53478_c0_seq12	G
comp57673_c0_seq1	V
comp36980_c0_seq1	J
comp58788_c1_seq1	O
comp41147_c0_seq1	R
comp58487_c0_seq2	C
comp56481_c0_seq1	G
comp55351_c1_seq2	R
comp44308_c0_seq1	O
comp42262_c1_seq1	C
comp43253_c1_seq1	J
comp403259_c0_seq1	E
comp55101_c0_seq29	L
comp47691_c0_seq1	J
comp56585_c0_seq1	C
comp77229_c0_seq1	J
comp55395_c0_seq1	F
comp50533_c0_seq5	R
comp56204_c0_seq1	R
comp27609_c0_seq1	J
comp59273_c1_seq2	L
comp53390_c0_seq1	R
comp53600_c0_seq1	C
comp58082_c1_seq3	H
comp56425_c1_seq1	L
comp55386_c0_seq34	O
comp56713_c0_seq3	L
comp37035_c0_seq1	C
comp45697_c0_seq1	M
comp59428_c0_seq18	C
comp55791_c0_seq1	G
comp217_c0_seq1	L
comp53022_c0_seq3	V
comp44559_c0_seq1	I
comp48064_c0_seq1	Q
comp58079_c0_seq6	L
comp55590_c0_seq5	R
comp11954_c0_seq1	J
comp151609_c0_seq1	E
comp59833_c0_seq8	H
comp59429_c0_seq5	D
comp133958_c0_seq1	C
comp54079_c0_seq1	O
comp57387_c0_seq1	O
comp45045_c0_seq1	J
comp56588_c1_seq2	L
comp354061_c0_seq1	U
comp52625_c0_seq2	S
comp59002_c0_seq4	J
comp35916_c0_seq1	J
comp51572_c0_seq1	P
comp1172_c0_seq1	C
comp55417_c0_seq1	E
comp352574_c0_seq1	C
comp59676_c0_seq85	F
comp55735_c0_seq2	C
comp54879_c0_seq1	O
comp58059_c2_seq3	J
comp52312_c0_seq16	H
comp55754_c0_seq4	L
comp39415_c0_seq1	L
comp54300_c0_seq1	S
comp54300_c0_seq1	R
comp53259_c0_seq3	G
comp52568_c0_seq1	G
comp47401_c0_seq2	R
comp38080_c0_seq1	I
comp58440_c0_seq35	R
comp57741_c1_seq1	O
comp59280_c0_seq2	O
comp55187_c0_seq1	J
comp44328_c0_seq1	V
comp51641_c0_seq6	R
comp59401_c2_seq5	R
comp47915_c0_seq1	O
comp51533_c0_seq1	Q
comp58365_c2_seq3	Q
comp46990_c0_seq1	C
comp32423_c0_seq1	G
comp57314_c0_seq3	J
comp30155_c0_seq1	J
comp54533_c0_seq1	L
comp208109_c0_seq1	H
comp57297_c0_seq23	R
comp16315_c0_seq1	Q
comp52844_c2_seq5	P
comp32572_c0_seq1	O
comp59635_c0_seq6	G
comp55703_c0_seq7	U
comp59545_c0_seq2	P
comp50344_c0_seq3	H
comp58912_c1_seq2	P
comp58020_c0_seq5	L
comp247116_c0_seq1	F
comp247116_c0_seq1	R
comp35487_c0_seq1	H
comp50584_c1_seq1	R
comp41143_c0_seq1	J
comp55491_c0_seq2	L
comp46483_c0_seq1	I
comp55015_c1_seq1	O
comp58561_c0_seq1	P
comp50315_c0_seq3	L
comp53643_c0_seq2	K
comp53643_c0_seq2	L
comp59700_c0_seq10	R
comp55869_c1_seq1	R
comp53108_c1_seq1	E
comp37230_c0_seq1	M
comp59387_c0_seq8	L
comp60157_c0_seq1	R
comp58531_c3_seq24	K
comp24465_c0_seq1	H
comp39672_c0_seq1	C
comp164051_c0_seq1	C
comp34467_c0_seq1	J
comp38118_c0_seq1	L
comp40800_c0_seq1	R
comp50103_c0_seq4	L
comp14352_c0_seq1	J
comp36435_c0_seq1	O
comp54017_c0_seq1	C
comp59028_c1_seq4	I
comp59443_c0_seq6	C
comp50902_c0_seq1	R
comp54354_c1_seq1	G
comp58906_c0_seq8	D
comp58906_c0_seq8	L
comp32722_c0_seq1	J
comp48301_c0_seq2	O
comp51869_c0_seq1	U
comp59367_c0_seq1	M
comp359052_c0_seq1	C
comp55230_c0_seq2	L
comp47585_c0_seq2	E
comp59487_c0_seq1	S
comp42401_c1_seq1	I
comp46683_c0_seq2	O
comp3930_c0_seq1	C
comp58299_c0_seq2	J
comp52873_c1_seq2	O
comp56464_c0_seq9	O
comp49633_c0_seq1	P
comp46895_c0_seq3	H
comp34212_c0_seq1	J
comp53279_c0_seq1	M
comp365101_c0_seq1	O
comp55983_c0_seq2	G
comp169994_c0_seq1	O
comp45851_c0_seq2	B
comp44227_c0_seq3	R
comp51031_c0_seq2	J
comp51084_c0_seq1	H
comp43208_c0_seq1	E
comp58334_c0_seq1	M
comp54801_c0_seq6	V
comp45992_c0_seq1	C
comp56295_c0_seq2	S
comp56295_c0_seq2	L
comp52911_c0_seq1	M
comp51527_c0_seq1	O
comp60011_c1_seq2	P
comp58055_c0_seq5	L
comp58055_c0_seq5	R
comp53914_c0_seq1	H
comp53914_c0_seq1	R
comp354563_c0_seq1	E
comp23969_c0_seq1	P
comp49751_c0_seq2	C
comp53694_c0_seq3	V
comp56926_c0_seq5	R
comp52676_c0_seq4	Q
comp59070_c0_seq1	C
comp52747_c0_seq1	R
comp55428_c1_seq3	R
comp234362_c0_seq1	J
comp60097_c0_seq4	J
comp36726_c0_seq1	I
comp56433_c0_seq1	G
comp51541_c0_seq3	H
comp37534_c0_seq2	J
comp29574_c0_seq1	H
comp53368_c0_seq1	J
comp52728_c0_seq3	C
comp50749_c0_seq1	O
comp55284_c0_seq2	R
comp15324_c1_seq1	G
comp56506_c0_seq2	H
comp40173_c0_seq2	J
comp59463_c1_seq6	R
comp41167_c0_seq3	E
comp59594_c0_seq1	L
comp47274_c0_seq1	J
comp49224_c0_seq2	R
comp49224_c0_seq2	S
comp46924_c0_seq1	J
comp31659_c0_seq1	K
comp40663_c0_seq1	O
comp57974_c0_seq1	R
comp57826_c3_seq2	O
comp33206_c0_seq1	I
comp54256_c0_seq1	E
comp36590_c0_seq2	V
comp57821_c0_seq6	O
comp48321_c0_seq1	M
comp46391_c0_seq6	C
comp361484_c0_seq1	R
comp42954_c0_seq1	T
comp54299_c0_seq1	L
comp43860_c0_seq2	G
comp393617_c0_seq1	R
comp53621_c0_seq2	P
comp52806_c0_seq1	R
comp55660_c0_seq1	V
comp56837_c0_seq3	O
comp54125_c0_seq1	O
comp16902_c0_seq1	R
comp58419_c0_seq2	L
comp58868_c0_seq1	F
comp56701_c0_seq3	O
comp58485_c0_seq7	L
comp55365_c2_seq4	C
comp44202_c0_seq1	I
comp43703_c0_seq1	J
comp54238_c0_seq2	C
comp49813_c1_seq7	C
comp42818_c0_seq1	R
comp27485_c0_seq1	J
comp52251_c2_seq1	E
comp58172_c0_seq2	S
comp50971_c0_seq1	J
comp53223_c0_seq1	E
comp55017_c1_seq12	G
comp37812_c1_seq1	O
comp286807_c0_seq1	E
comp57921_c0_seq30	R
comp56635_c0_seq1	Q
comp43926_c0_seq1	G
comp35276_c0_seq1	O
comp57776_c0_seq1	L
comp59202_c1_seq9	K
comp57214_c0_seq1	R
comp56376_c0_seq3	H
comp53644_c0_seq1	G
comp56480_c0_seq7	L
comp60027_c0_seq1	S
comp51689_c1_seq2	J
comp54483_c0_seq2	O
comp57405_c0_seq9	L
comp30313_c0_seq1	Q
comp55055_c0_seq2	E
comp31064_c0_seq1	G
comp38571_c0_seq1	R
comp55612_c1_seq4	M
comp56443_c0_seq7	R
comp56196_c0_seq1	H
comp1917_c0_seq1	J
comp48254_c0_seq3	R
comp40562_c0_seq1	O
comp49928_c0_seq3	C
comp56013_c0_seq2	J
comp52358_c0_seq3	R
comp53803_c0_seq1	R
comp54979_c0_seq1	L
comp51481_c0_seq1	F
comp44296_c0_seq3	V
comp59116_c0_seq13	E
comp47857_c2_seq2	Q
comp44341_c0_seq1	C
comp57389_c0_seq5	O
comp59458_c0_seq1	J
comp58826_c1_seq1	P
comp54628_c0_seq1	C
comp54440_c0_seq1	L
comp54538_c1_seq2	V
comp49885_c0_seq1	M
comp47567_c0_seq1	G
comp47906_c0_seq1	O
comp52389_c0_seq2	R
comp49916_c0_seq1	L
comp49797_c0_seq1	O
comp58715_c1_seq3	J
comp260009_c0_seq1	J
comp58834_c0_seq2	D
comp203265_c0_seq1	I
comp58549_c0_seq1	J
comp55412_c0_seq3	S
comp48576_c0_seq1	O
comp131889_c0_seq1	S
comp131889_c0_seq1	I
comp55772_c0_seq23	S
comp59273_c0_seq2	E
comp57126_c0_seq8	J
comp55614_c0_seq4	H
comp49615_c0_seq2	O
comp54779_c0_seq1	R
comp39469_c0_seq1	S
comp447078_c0_seq1	C
comp32708_c0_seq1	J
comp56789_c2_seq1	E
comp51875_c0_seq1	Q
comp48433_c0_seq1	J
comp54908_c3_seq1	E
comp60139_c2_seq10	E
comp514661_c0_seq1	U
comp244845_c0_seq1	O
comp57959_c0_seq1	C
comp28658_c0_seq1	O
comp45451_c0_seq4	E
comp54232_c1_seq1	P
comp438754_c0_seq1	C
comp279534_c0_seq1	Q
comp57097_c1_seq1	E
comp59562_c0_seq32	L
comp57847_c0_seq5	J
comp53553_c1_seq9	O
comp54868_c0_seq2	J
comp180945_c0_seq1	E
comp57367_c2_seq3	D
comp285720_c0_seq1	J
comp52812_c0_seq2	F
comp50865_c0_seq1	O
comp56127_c0_seq3	Q
comp53208_c0_seq2	E
comp176893_c0_seq1	C
comp51634_c0_seq3	L
comp40193_c0_seq1	I
comp46444_c0_seq1	J
comp43992_c0_seq1	J
comp49191_c0_seq1	I
comp55498_c0_seq1	L
comp59908_c0_seq1	S
comp37634_c0_seq1	Q
comp74595_c0_seq1	C
comp43331_c1_seq1	I
comp58610_c0_seq1	L
comp54347_c0_seq8	O
comp43941_c0_seq1	R
comp356094_c0_seq1	O
comp56704_c0_seq2	H
comp134897_c0_seq1	C
comp56096_c0_seq3	L
comp57285_c0_seq1	R
comp56864_c0_seq1	P
comp56305_c0_seq10	M
comp56305_c0_seq10	T
comp50385_c0_seq3	P
comp385947_c0_seq1	C
comp59067_c0_seq12	G
comp54142_c0_seq1	L
comp52803_c1_seq3	T
comp49459_c0_seq1	H
comp53379_c1_seq2	S
comp50573_c0_seq1	C
comp56008_c4_seq1	J
comp41683_c0_seq1	G
comp55645_c0_seq2	E
comp52662_c0_seq2	L
comp55585_c0_seq3	M
comp47881_c0_seq1	L
comp53726_c0_seq4	H
comp48480_c0_seq1	M
comp55702_c0_seq2	J
comp52744_c0_seq1	R
comp45001_c0_seq1	S
comp55943_c0_seq6	H
comp48225_c0_seq1	G
comp55092_c1_seq1	R
comp55092_c1_seq1	J
comp58399_c0_seq2	H
comp56433_c1_seq2	G
comp36587_c1_seq1	C
comp37150_c0_seq1	O
comp56939_c2_seq7	J
comp53640_c0_seq1	R
comp42459_c0_seq2	O
comp41853_c0_seq1	H
comp28597_c0_seq1	J
comp298773_c0_seq1	G
comp79169_c0_seq1	K
comp44110_c0_seq1	R
comp58398_c0_seq6	L
comp179692_c0_seq1	V
comp56699_c0_seq2	L
comp27432_c0_seq1	R
comp54276_c0_seq1	Q
comp54304_c0_seq1	E
comp53007_c0_seq4	R
comp30114_c0_seq1	G
comp39651_c0_seq1	R
comp212582_c0_seq1	O
comp56018_c0_seq38	S
comp51306_c0_seq7	J
comp49203_c0_seq1	V
comp61241_c0_seq1	O
comp518125_c0_seq1	J
comp47768_c0_seq1	H
comp58687_c0_seq3	J
comp54650_c0_seq8	G
comp52200_c0_seq1	R
comp53930_c0_seq1	O
comp120953_c0_seq1	J
comp42801_c1_seq1	S
comp47509_c0_seq1	O
comp14153_c0_seq1	J
comp53915_c1_seq1	O
comp57112_c0_seq33	L
comp50447_c0_seq1	H
comp58446_c1_seq8	I
comp49980_c0_seq2	T
comp57545_c0_seq9	R
comp48792_c0_seq1	J
comp57998_c1_seq5	R
comp57998_c1_seq5	O
comp55676_c0_seq3	C
comp49609_c0_seq1	J
comp34090_c2_seq1	U
comp25703_c0_seq1	P
comp46288_c0_seq2	C
comp46752_c0_seq1	R
comp58552_c0_seq1	H
comp52003_c0_seq1	J
comp539_c0_seq1	J
comp51213_c0_seq1	L
comp55433_c0_seq1	O
comp283876_c0_seq1	S
comp305442_c0_seq1	F
comp49470_c1_seq2	O
comp37768_c1_seq1	E
comp43275_c0_seq1	L
comp556931_c0_seq1	S
comp51789_c0_seq4	L
comp16788_c0_seq1	R
comp37835_c0_seq1	T
comp54077_c0_seq10	F
comp59641_c0_seq2	R
comp54694_c0_seq1	Q
comp48045_c0_seq1	J
comp56866_c0_seq4	L
comp45887_c0_seq9	R
comp54826_c0_seq3	J
comp47509_c1_seq1	O
comp34248_c0_seq1	L
comp349854_c0_seq1	K
comp54953_c0_seq1	O
comp46035_c1_seq2	H
comp52053_c0_seq4	R
comp29058_c0_seq1	O
comp58258_c0_seq1	L
comp125125_c0_seq1	J
comp55752_c0_seq1	F
comp55611_c0_seq3	E
comp54175_c0_seq2	J
comp56130_c2_seq9	I
comp386337_c0_seq1	H
comp58996_c1_seq1	R
comp58996_c1_seq1	P
comp58725_c1_seq3	E
comp47877_c0_seq1	I
comp43705_c0_seq1	O
comp47815_c0_seq9	R
comp51884_c0_seq1	V
comp59529_c0_seq4	G
comp376_c0_seq1	C
comp53925_c0_seq1	P
comp58841_c0_seq6	C
comp47979_c0_seq2	O
comp56806_c0_seq1	L
comp17890_c0_seq1	C
comp55190_c0_seq3	I
comp45392_c0_seq1	J
comp42693_c0_seq1	C
comp59984_c0_seq7	R
comp56173_c0_seq14	R
comp40660_c0_seq1	R
comp59675_c0_seq3	R
comp58659_c0_seq1	J
comp51969_c0_seq1	O
comp46450_c0_seq1	E
comp58178_c0_seq1	R
comp58102_c0_seq1	C
comp48304_c0_seq1	L
comp48093_c0_seq2	M
comp53851_c0_seq1	Q
comp52005_c0_seq2	J
comp55330_c0_seq3	S
comp56681_c0_seq4	R
comp58360_c2_seq1	V
comp39727_c0_seq1	R
comp42961_c0_seq2	H
comp42521_c0_seq1	E
comp58491_c0_seq2	L
comp42796_c0_seq1	R
comp59013_c0_seq9	E
comp41622_c0_seq2	J
comp57059_c0_seq1	R
comp594937_c0_seq1	P
comp152157_c0_seq1	L
comp22387_c0_seq1	H
comp56455_c0_seq2	O
comp55704_c1_seq4	K
comp280361_c0_seq1	H
comp53469_c0_seq6	R
comp137740_c0_seq1	J
comp57579_c0_seq19	R
comp53835_c0_seq3	E
comp36354_c0_seq1	J
comp51659_c0_seq2	E
comp54266_c0_seq25	O
comp211117_c0_seq1	C
comp57788_c0_seq5	I
comp55122_c0_seq1	L
comp48205_c0_seq4	G
comp60103_c0_seq3	R
comp59518_c4_seq2	R
comp56857_c0_seq3	F
comp47860_c0_seq1	C
comp286818_c0_seq1	J
comp58625_c0_seq1	Q
comp43175_c0_seq1	C
comp56643_c0_seq10	C
comp500754_c0_seq1	J
comp50337_c1_seq1	L
comp296602_c0_seq1	G
comp59761_c0_seq2	U
comp47845_c0_seq3	R
comp57048_c0_seq5	H
comp1019_c1_seq1	L
comp361184_c0_seq1	R
comp53815_c0_seq1	J
comp53283_c0_seq3	Q
comp59928_c0_seq29	L
comp17240_c0_seq1	J
comp56451_c0_seq1	O
comp45630_c2_seq1	E
comp48997_c0_seq1	J
comp54784_c0_seq2	E
comp49747_c1_seq1	R
comp48177_c0_seq4	O
comp58489_c0_seq1	C
comp44308_c1_seq1	O
comp31308_c0_seq1	R
comp10489_c0_seq1	C
comp42686_c0_seq1	J
comp36580_c2_seq1	C
comp58694_c1_seq5	H
comp54983_c0_seq5	E
comp42222_c0_seq3	J
comp51049_c0_seq3	J
comp5709_c0_seq1	R
comp51412_c0_seq1	G
comp53979_c0_seq2	R
comp46486_c0_seq1	G
comp55636_c0_seq15	E
comp51215_c0_seq2	O
comp208239_c0_seq1	M
comp57937_c0_seq23	I
comp26835_c0_seq1	J
comp57587_c0_seq10	C
comp46584_c0_seq1	J
comp563610_c0_seq1	P
comp52341_c0_seq1	C
comp244521_c0_seq1	C
comp57746_c0_seq1	O
comp49546_c0_seq8	C
comp49546_c0_seq8	G
comp56893_c0_seq15	P
comp562150_c0_seq1	C
comp54836_c0_seq3	K
comp54052_c0_seq2	I
comp54834_c0_seq3	P
comp59386_c0_seq19	J
comp59386_c0_seq19	P
comp48386_c0_seq1	J
comp55766_c0_seq9	E
comp59715_c0_seq9	T
comp33744_c0_seq1	H
comp55222_c0_seq1	L
comp37914_c0_seq1	O
comp57054_c0_seq6	G
comp56581_c2_seq8	P
comp50441_c0_seq3	Q
comp38087_c0_seq1	H
comp57186_c1_seq2	E
comp59626_c2_seq1	O
comp57433_c0_seq2	O
comp48146_c0_seq1	J
comp56549_c0_seq2	O
comp59352_c1_seq2	R
comp59340_c0_seq2	L
comp53507_c0_seq2	O
comp28078_c0_seq1	J
comp411888_c0_seq1	S
comp59254_c0_seq2	L
comp52730_c0_seq1	R
comp1644_c0_seq1	L
comp59406_c0_seq71	L
comp58927_c0_seq5	P
comp44008_c0_seq1	O
comp57438_c2_seq2	R
comp57438_c2_seq2	F
comp51388_c0_seq2	J
comp54830_c0_seq1	R
comp50324_c0_seq1	G
comp716_c1_seq1	R
comp53828_c0_seq1	R
comp58708_c0_seq4	C
comp55802_c0_seq1	G
comp395720_c0_seq1	H
comp54877_c0_seq2	I
comp51713_c0_seq1	E
comp131415_c0_seq1	R
comp41837_c0_seq1	C
comp52225_c2_seq12	P
comp380487_c0_seq1	M
comp59624_c0_seq2	R
comp59624_c0_seq2	M
comp54468_c0_seq1	C
comp54088_c0_seq2	J
comp390556_c0_seq1	L
comp58362_c0_seq3	L
comp33218_c0_seq1	E
comp43932_c0_seq1	O
comp40621_c0_seq1	R
comp59685_c1_seq2	S
comp56215_c0_seq6	F
comp59489_c3_seq1	K
comp189_c0_seq1	C
comp185937_c0_seq1	L
comp59742_c1_seq3	P
comp231901_c0_seq1	J
comp56499_c0_seq1	G
comp307161_c0_seq1	C
comp33657_c0_seq1	O
comp52489_c0_seq4	S
comp52012_c0_seq17	G
comp49811_c0_seq1	R
comp56207_c0_seq5	L
comp49075_c0_seq1	H
comp208241_c0_seq1	Q
comp28736_c0_seq1	O
comp51910_c3_seq1	S
comp58998_c0_seq5	L
comp53567_c0_seq2	F
comp56668_c0_seq18	E
comp52713_c1_seq1	L
comp53887_c0_seq1	P
comp45342_c1_seq2	P
comp46605_c0_seq1	L
comp56886_c0_seq2	E
comp47485_c0_seq1	O
comp47485_c0_seq1	C
comp49072_c0_seq1	G
comp51138_c0_seq2	B
comp50946_c0_seq2	L
comp53624_c0_seq1	P
comp59987_c1_seq1	O
comp16897_c0_seq1	R
comp49181_c0_seq3	V
comp58573_c1_seq2	G
comp38944_c0_seq1	J
comp15110_c0_seq1	J
comp50871_c1_seq2	H
comp52903_c0_seq1	O
comp57936_c0_seq1	P
comp56406_c0_seq5	L
comp52176_c0_seq1	S
comp48009_c0_seq1	L
comp58537_c0_seq2	I
comp59711_c0_seq1	S
comp59711_c0_seq1	T
comp50227_c0_seq2	E
comp36190_c3_seq1	R
comp52162_c0_seq1	E
comp55469_c0_seq5	H
comp43239_c0_seq2	I
comp59954_c0_seq1	T
comp48397_c0_seq1	V
comp59852_c2_seq29	V
comp42159_c0_seq1	E
comp57017_c1_seq1	Q
comp3350_c0_seq1	J
comp46197_c0_seq1	R
comp40471_c0_seq1	L
comp47886_c1_seq1	I
comp47886_c1_seq1	R
comp47765_c0_seq1	R
comp35003_c1_seq1	L
comp58771_c0_seq3	O
comp53870_c0_seq5	P
comp46701_c0_seq1	R
comp59205_c1_seq7	J
comp396943_c0_seq1	I
comp42706_c0_seq1	P
comp54270_c0_seq2	J
comp51002_c0_seq1	M
comp46735_c0_seq2	I
comp54647_c0_seq2	O
comp2503_c0_seq1	R
comp45191_c0_seq2	J
comp45191_c0_seq2	K
comp53135_c0_seq2	J
comp56357_c0_seq1	O
comp59217_c0_seq5	I
comp48711_c0_seq4	G
comp57873_c0_seq12	J
comp56949_c0_seq1	R
comp52511_c0_seq4	J
comp34070_c0_seq1	J
comp55418_c0_seq4	R
comp40711_c0_seq1	H
comp55860_c0_seq1	G
comp54338_c0_seq1	L
comp58646_c0_seq10	R
comp2131_c0_seq1	I
comp46261_c0_seq1	J
comp58380_c0_seq2	U
comp53855_c0_seq1	S
comp145827_c0_seq1	E
comp55789_c0_seq1	S
comp49386_c0_seq4	D
comp47997_c3_seq1	R
comp279291_c0_seq1	F
comp46192_c0_seq1	L
comp60981_c0_seq1	J
comp4194_c0_seq1	E
comp48541_c1_seq2	R
comp56527_c0_seq2	O
comp632_c1_seq1	G
comp400743_c0_seq1	J
comp56062_c0_seq6	R
comp476169_c0_seq1	C
comp49743_c0_seq2	L
comp56462_c1_seq1	J
comp53217_c1_seq1	O
comp56335_c0_seq1	O
comp56333_c0_seq2	U
comp55193_c0_seq2	R
comp59925_c0_seq6	L
comp44866_c0_seq1	S
comp350738_c0_seq1	Q
comp51415_c0_seq3	G
comp57290_c0_seq3	S
comp52488_c0_seq1	E
comp51802_c0_seq2	R
comp49676_c0_seq3	P
comp57794_c0_seq5	O
comp52488_c1_seq1	E
comp29569_c0_seq1	C
comp53635_c0_seq3	J
comp275855_c0_seq1	R
comp7120_c0_seq1	S
comp50165_c0_seq1	L
comp46533_c1_seq2	L
comp58236_c0_seq6	E
comp35072_c1_seq1	R
comp57524_c4_seq1	G
comp58919_c0_seq1	F
comp48954_c0_seq3	R
comp378573_c0_seq1	J
comp378573_c0_seq1	M
comp50663_c1_seq1	R
comp16472_c0_seq1	E
comp44199_c0_seq1	G
comp44199_c0_seq1	C
comp52558_c0_seq2	Q
comp60128_c1_seq1	G
comp50385_c1_seq1	P
comp65967_c0_seq1	C
comp56601_c0_seq3	L
comp517_c1_seq1	P
comp369571_c0_seq1	G
comp59607_c0_seq10	J
comp51722_c0_seq1	O
comp44210_c0_seq1	O
comp36459_c1_seq1	L
comp49738_c0_seq3	R
comp60144_c0_seq3	L
comp39949_c0_seq1	O
comp57584_c0_seq5	O
comp44166_c1_seq1	G
comp53148_c0_seq12	G
comp58580_c6_seq3	I
comp111304_c0_seq1	Q
comp437843_c0_seq1	U
comp53523_c0_seq3	O
comp53242_c0_seq12	R
comp43856_c0_seq1	J
comp53074_c0_seq8	R
comp52933_c0_seq6	A
comp53915_c0_seq5	O
comp54757_c0_seq1	L
comp49273_c0_seq1	O
comp293604_c0_seq1	C
comp357754_c0_seq1	C
comp357754_c0_seq1	R
comp27491_c0_seq1	O
comp41551_c0_seq1	Q
comp56782_c0_seq1	L
comp54187_c0_seq3	M
comp55807_c0_seq2	F
comp459241_c0_seq1	J
comp43059_c1_seq1	J
comp58577_c2_seq31	G
comp55682_c0_seq1	J
comp46015_c0_seq1	F
comp29239_c0_seq1	P
comp55495_c0_seq4	L
comp481135_c0_seq1	R
comp59837_c0_seq2	L
comp180793_c0_seq1	E
comp50266_c2_seq1	L
comp714957_c0_seq1	H
comp58568_c0_seq2	C
comp54889_c0_seq1	R
comp56363_c0_seq29	R
comp52683_c0_seq1	L
comp51403_c2_seq1	O
comp56043_c0_seq1	R
comp43030_c0_seq1	M
comp52472_c0_seq2	C
comp50239_c0_seq1	C
comp49613_c0_seq1	O
comp49831_c0_seq1	J
comp541560_c0_seq1	G
comp290943_c0_seq1	O
comp106604_c0_seq1	C
comp48121_c0_seq2	H
comp50306_c0_seq1	D
comp54787_c0_seq22	J
comp40842_c0_seq1	R
comp26380_c0_seq1	C
comp17666_c0_seq1	K
comp136213_c0_seq1	Q
comp482361_c0_seq1	S
comp54457_c0_seq3	F
comp46769_c0_seq1	G
comp56253_c0_seq5	U
comp53091_c0_seq1	E
comp51746_c0_seq6	E
comp353500_c0_seq1	K
comp47568_c0_seq1	G
comp35840_c0_seq1	U
comp48140_c0_seq1	O
comp55568_c1_seq8	F
comp55141_c0_seq1	R
comp22614_c0_seq1	C
comp54725_c0_seq4	J
comp45904_c0_seq1	E
comp44678_c1_seq2	R
comp46747_c0_seq1	H
comp44260_c0_seq1	S
comp59765_c3_seq10	R
comp59765_c3_seq10	O
comp294812_c0_seq1	J
comp53257_c0_seq1	S
comp55737_c1_seq1	G
comp64192_c0_seq1	P
comp64192_c0_seq1	M
comp55910_c0_seq26	R
comp52535_c0_seq10	G
comp58228_c0_seq4	C
comp59420_c0_seq6	M
comp56086_c0_seq1	O
comp238377_c0_seq1	J
comp43715_c0_seq1	S
comp42520_c0_seq1	I
comp54033_c0_seq1	I
comp56369_c0_seq2	R
comp20046_c0_seq1	O
comp49324_c0_seq1	C
comp134053_c0_seq1	J
comp267551_c0_seq1	F
comp59689_c0_seq2	E
comp28282_c0_seq1	J
comp46176_c0_seq1	O
comp51667_c0_seq1	C
comp17524_c0_seq1	I
comp42147_c0_seq1	Q
comp213615_c0_seq1	V
comp53068_c1_seq1	D
comp53068_c1_seq1	L
comp21019_c0_seq1	C
comp137294_c0_seq1	J
comp57209_c0_seq2	E
comp15200_c0_seq1	L
comp59158_c3_seq2	P
comp59721_c0_seq6	V
comp33939_c0_seq1	C
comp48048_c0_seq1	O
comp36526_c0_seq1	R
comp36526_c0_seq1	E
comp32231_c0_seq1	S
comp40115_c0_seq1	O
comp57524_c3_seq6	G
comp46180_c0_seq1	L
comp47717_c0_seq2	Q
comp46737_c0_seq1	C
comp53837_c0_seq3	S
comp59723_c0_seq2	R
comp57972_c0_seq1	R
comp56473_c0_seq1	R
comp49092_c0_seq2	H
comp42639_c0_seq1	R
comp52922_c0_seq1	L
comp55070_c0_seq2	R
comp53538_c1_seq2	L
comp55459_c0_seq3	Q
comp95040_c0_seq1	Q
comp62603_c0_seq1	C
comp153873_c0_seq1	J
comp367973_c0_seq1	O
comp56753_c0_seq1	Q
comp50671_c0_seq2	G
comp252256_c0_seq1	I
comp252256_c0_seq1	C
comp244370_c0_seq1	H
comp49918_c0_seq1	O
comp26222_c0_seq1	J
comp54658_c1_seq2	P
comp51368_c0_seq1	G
comp46960_c0_seq1	Q
comp58134_c1_seq2	L
comp27036_c0_seq1	V
comp47455_c0_seq1	O
comp53128_c0_seq1	C
comp53128_c0_seq1	R
comp40004_c0_seq2	S
comp46456_c0_seq1	C
comp58610_c1_seq1	E
comp42927_c1_seq1	J
comp57192_c0_seq2	F
comp50409_c0_seq1	R
comp55273_c0_seq1	G
comp59511_c0_seq2	U
comp56630_c0_seq7	L
comp51186_c0_seq2	T
comp58531_c0_seq6	J
comp50751_c0_seq1	J
comp57764_c0_seq4	T
comp151072_c0_seq1	K
comp55236_c0_seq1	L
comp55236_c0_seq1	R
comp54929_c0_seq1	I
comp59123_c0_seq4	O
comp55964_c0_seq1	E
comp48481_c0_seq3	O
comp33316_c0_seq1	G
comp234494_c0_seq1	L
comp36913_c0_seq1	H
comp55108_c0_seq1	H
comp56795_c1_seq3	A
comp313259_c0_seq1	V
comp59396_c3_seq3	H
comp54788_c0_seq3	P
comp59696_c1_seq2	R
comp55160_c0_seq12	F
comp50658_c0_seq3	L
comp54098_c0_seq1	L
comp182282_c0_seq1	C
comp44194_c0_seq2	J
comp46851_c0_seq4	F
comp42608_c0_seq1	O
comp14756_c0_seq1	O
comp56244_c0_seq10	H
comp277415_c0_seq1	E
comp59180_c0_seq26	G
comp56620_c2_seq4	L
comp58822_c0_seq1	M
comp59167_c0_seq5	L
comp46751_c0_seq1	C
comp62841_c0_seq1	Q
comp59390_c0_seq19	L
comp43944_c0_seq1	R
comp50922_c0_seq1	G
comp46544_c0_seq1	O
comp53687_c0_seq1	P
comp44363_c0_seq2	E
comp60119_c0_seq15	R
comp645664_c0_seq1	J
comp50159_c0_seq1	S
comp52851_c1_seq1	F
comp42172_c2_seq1	O
comp52264_c0_seq1	G
comp6746_c0_seq1	E
comp54963_c0_seq19	G
comp20044_c1_seq1	D
comp58547_c0_seq1	C
comp55378_c0_seq2	I
comp54044_c0_seq1	Q
comp53452_c0_seq2	J
comp47857_c0_seq1	Q
comp47828_c0_seq1	P
comp205120_c0_seq1	H
comp59887_c0_seq1	O
comp51523_c0_seq3	I
comp56834_c0_seq5	K
comp277241_c0_seq1	V
comp20567_c0_seq1	C
comp33268_c0_seq1	C
comp2757_c0_seq1	O
comp57185_c0_seq4	O
comp57951_c0_seq1	L
comp55347_c0_seq2	L
comp55234_c0_seq5	J
comp37865_c0_seq1	O
comp55000_c0_seq1	G
comp15984_c0_seq1	E
comp58604_c0_seq1	L
comp60080_c1_seq1	L
comp54557_c0_seq1	G
comp27488_c0_seq1	M
comp56884_c3_seq2	L
comp54872_c0_seq1	R
comp233587_c0_seq1	J
comp50552_c0_seq2	Q
comp41309_c1_seq1	L
comp58888_c0_seq1	R
comp57884_c0_seq9	M
comp56338_c0_seq2	S
comp27750_c0_seq1	I
comp57509_c0_seq2	J
comp59440_c0_seq8	G
comp56770_c1_seq2	L
comp42205_c2_seq1	R
comp28940_c0_seq1	J
comp288_c0_seq1	H
comp30874_c0_seq1	O
comp49777_c0_seq4	G
comp54240_c0_seq1	R
comp45575_c0_seq1	J
comp49555_c0_seq1	L
comp49674_c0_seq1	V
comp44374_c0_seq1	E
comp50414_c0_seq4	R
comp57409_c0_seq22	Q
comp52646_c0_seq2	L
comp57977_c0_seq5	L
comp36088_c0_seq2	M
comp52080_c0_seq2	Q
comp201662_c0_seq1	J
comp54045_c0_seq3	O
comp35458_c0_seq1	G
comp37344_c2_seq1	E
comp47276_c0_seq5	J
comp40474_c0_seq1	O
comp59033_c0_seq11	S
comp57311_c0_seq3	L
comp46115_c0_seq2	I
comp58963_c0_seq2	O
comp151556_c0_seq1	J
comp56171_c0_seq5	G
comp52841_c0_seq3	E
comp488710_c0_seq1	P
comp56687_c0_seq19	K
comp50648_c1_seq2	R
comp57995_c0_seq2	E
comp48339_c0_seq2	F
comp58033_c0_seq2	L
comp45062_c0_seq1	I
comp59302_c0_seq2	O
comp57226_c1_seq1	P
comp48310_c0_seq1	O
comp367806_c0_seq1	P
comp57487_c0_seq4	J
comp54804_c1_seq7	E
comp46267_c0_seq1	J
comp50293_c0_seq1	L
comp43203_c0_seq1	J
comp59323_c2_seq22	J
comp59471_c1_seq1	Q
comp49166_c0_seq1	G
comp57931_c0_seq4	M
comp49167_c0_seq1	H
comp54586_c0_seq1	L
comp57372_c0_seq3	U
comp51691_c1_seq1	O
comp59376_c0_seq20	E
comp52755_c1_seq1	C
comp27270_c0_seq1	C
comp381121_c0_seq1	H
comp50121_c0_seq1	O
comp59987_c0_seq2	E
comp59356_c0_seq2	C
comp48441_c0_seq1	T
[truncated: 4,012 more rows]
