# Supplementary material for: De Novo Assembly and Characterization of Sophora japonica Transcriptome Using RNA-seq
Source: Biomed Res Int. 2014 Jan 2;2014:750961. doi: 10.1155/2014/750961 (PMC3910276; doi:10.1155/2014/750961)
Supplement: Supplementary file 1 — Additional file1: Information of unigenes expression in S. japonica. Additional file2: DNA sequences of all unigenes in S. japonica. Additional file3: Potential protein coding sequences of all unigenes in S. japonica. Additional file4: Quality score distribution across all bases. Additional file5: Quality score distribution over all sequences. Additional file6: Distribution of unigenes mapped to the speciesshown by pie graph. Additional file7: Detailed information for GO classification of unigenes in S. japonica. Additional file8: COG functional classification list of unigenes in S. japonica. Additional file9: Detailed information for unignenes mapping KEGG pathway in S. japonica. Additional file10: Illustration of the whole network of unigenes in S. japonica. Additional file11: Protein-protein interactions of unigenes in S. japonica. [file 750961.f1.zip › 750961.f1/Additional file/Additional file9 KEGG.txt]

A<b>Metabolism</b>
B
B  <b>Overview</b>
C    01200 Carbon metabolism [PATH:<a href="http://www.kegg.jp/kegg-bin/show_pathway?@ko01200/K01623/K00615/K01834/K15633/K15634/K00927/K00134/K05298/K03841/K01100/K01783/K00855/K00850/K00844/K01810/K00036/K01057/K00033/K01601/K01602/K01807/K01803/K00616/K01689/K00873/K01006/K00161/K00162/K00627/K00382/K01595/K01647/K00025/K00026/K01679/K00234/K00235/K01899/K01900/K00031/K00030/K01681/K02160/K01961/K01962/K01963/K00626/K00830/K00058/K00831/K01079/K00600/K01938/K00297/K01637/K00948/K01754/K00281/K00605/K01455/K00121/K01070/K00122/K00640/K01738/K13034/K01895/K00164/K00658/K00028/K00029/K00851">ko01200</a>]
D      comp55587_c0_seq2; <a href="/dbget-bin/www_bget?ko:K01623">K01623</a>  ALDO; fructose-bisphosphate aldolase, class I [EC:4.1.2.13]
D      comp56171_c0_seq5; <a href="/dbget-bin/www_bget?ko:K01623">K01623</a>  ALDO; fructose-bisphosphate aldolase, class I [EC:4.1.2.13]
D      comp56625_c2_seq1; <a href="/dbget-bin/www_bget?ko:K01623">K01623</a>  ALDO; fructose-bisphosphate aldolase, class I [EC:4.1.2.13]
D      comp58063_c1_seq3; <a href="/dbget-bin/www_bget?ko:K00615">K00615</a>  E2.2.1.1, tktA, tktB; transketolase [EC:2.2.1.1]
D      comp57359_c0_seq1; <a href="/dbget-bin/www_bget?ko:K01834">K01834</a>  PGAM, gpmA; 2,3-bisphosphoglycerate-dependent phosphoglycerate mutase [EC:5.4.2.1]
D      comp56438_c0_seq1; <a href="/dbget-bin/www_bget?ko:K15633">K15633</a>  gpmI; 2,3-bisphosphoglycerate-independent phosphoglycerate mutase [EC:5.4.2.1]
D      comp51488_c0_seq1; <a href="/dbget-bin/www_bget?ko:K15634">K15634</a>  gpmB; probable phosphoglycerate mutase [EC:5.4.2.1]
D      comp53729_c0_seq17; <a href="/dbget-bin/www_bget?ko:K15634">K15634</a>  gpmB; probable phosphoglycerate mutase [EC:5.4.2.1]
D      comp43783_c0_seq1; <a href="/dbget-bin/www_bget?ko:K00927">K00927</a>  PGK, pgk; phosphoglycerate kinase [EC:2.7.2.3]
D      comp53977_c0_seq1; <a href="/dbget-bin/www_bget?ko:K00134">K00134</a>  GAPDH, gapA; glyceraldehyde 3-phosphate dehydrogenase [EC:1.2.1.12]
D      comp79792_c0_seq1; <a href="/dbget-bin/www_bget?ko:K00134">K00134</a>  GAPDH, gapA; glyceraldehyde 3-phosphate dehydrogenase [EC:1.2.1.12]
D      comp52317_c0_seq1; <a href="/dbget-bin/www_bget?ko:K05298">K05298</a>  GAPA; glyceraldehyde-3-phosphate dehydrogenase (NADP+) (phosphorylating) [EC:1.2.1.13]
D      comp56174_c0_seq2; <a href="/dbget-bin/www_bget?ko:K05298">K05298</a>  GAPA; glyceraldehyde-3-phosphate dehydrogenase (NADP+) (phosphorylating) [EC:1.2.1.13]
D      comp36090_c0_seq1; <a href="/dbget-bin/www_bget?ko:K03841">K03841</a>  FBP, fbp; fructose-1,6-bisphosphatase I [EC:3.1.3.11]
D      comp48711_c0_seq4; <a href="/dbget-bin/www_bget?ko:K03841">K03841</a>  FBP, fbp; fructose-1,6-bisphosphatase I [EC:3.1.3.11]
D      comp57489_c0_seq9; <a href="/dbget-bin/www_bget?ko:K03841">K03841</a>  FBP, fbp; fructose-1,6-bisphosphatase I [EC:3.1.3.11]
D      comp32241_c0_seq1; <a href="/dbget-bin/www_bget?ko:K01100">K01100</a>  E3.1.3.37; sedoheptulose-bisphosphatase [EC:3.1.3.37]
D      comp52012_c0_seq17; <a href="/dbget-bin/www_bget?ko:K01783">K01783</a>  rpe, RPE; ribulose-phosphate 3-epimerase [EC:5.1.3.1]
D      comp56499_c0_seq1; <a href="/dbget-bin/www_bget?ko:K01783">K01783</a>  rpe, RPE; ribulose-phosphate 3-epimerase [EC:5.1.3.1]
D      comp34360_c0_seq1; <a href="/dbget-bin/www_bget?ko:K00855">K00855</a>  PRK, prkB; phosphoribulokinase [EC:2.7.1.19]
D      comp48562_c1_seq4; <a href="/dbget-bin/www_bget?ko:K00850">K00850</a>  pfkA, PFK; 6-phosphofructokinase 1 [EC:2.7.1.11]
D      comp49838_c0_seq1; <a href="/dbget-bin/www_bget?ko:K00850">K00850</a>  pfkA, PFK; 6-phosphofructokinase 1 [EC:2.7.1.11]
D      comp55737_c1_seq1; <a href="/dbget-bin/www_bget?ko:K00850">K00850</a>  pfkA, PFK; 6-phosphofructokinase 1 [EC:2.7.1.11]
D      comp58144_c0_seq2; <a href="/dbget-bin/www_bget?ko:K00850">K00850</a>  pfkA, PFK; 6-phosphofructokinase 1 [EC:2.7.1.11]
D      comp48404_c0_seq4; <a href="/dbget-bin/www_bget?ko:K00844">K00844</a>  HK; hexokinase [EC:2.7.1.1]
D      comp51148_c0_seq2; <a href="/dbget-bin/www_bget?ko:K00844">K00844</a>  HK; hexokinase [EC:2.7.1.1]
D      comp57111_c1_seq1; <a href="/dbget-bin/www_bget?ko:K00844">K00844</a>  HK; hexokinase [EC:2.7.1.1]
D      comp57637_c0_seq3; <a href="/dbget-bin/www_bget?ko:K00844">K00844</a>  HK; hexokinase [EC:2.7.1.1]
D      comp55017_c1_seq12; <a href="/dbget-bin/www_bget?ko:K01810">K01810</a>  GPI, pgi; glucose-6-phosphate isomerase [EC:5.3.1.9]
D      comp55983_c0_seq2; <a href="/dbget-bin/www_bget?ko:K01810">K01810</a>  GPI, pgi; glucose-6-phosphate isomerase [EC:5.3.1.9]
D      comp44095_c0_seq1; <a href="/dbget-bin/www_bget?ko:K00036">K00036</a>  G6PD, zwf; glucose-6-phosphate 1-dehydrogenase [EC:1.1.1.49]
D      comp55231_c0_seq2; <a href="/dbget-bin/www_bget?ko:K00036">K00036</a>  G6PD, zwf; glucose-6-phosphate 1-dehydrogenase [EC:1.1.1.49]
D      comp57069_c0_seq3; <a href="/dbget-bin/www_bget?ko:K00036">K00036</a>  G6PD, zwf; glucose-6-phosphate 1-dehydrogenase [EC:1.1.1.49]
D      comp53644_c0_seq1; <a href="/dbget-bin/www_bget?ko:K01057">K01057</a>  PGLS, pgl, devB; 6-phosphogluconolactonase [EC:3.1.1.31]
D      comp54027_c1_seq31; <a href="/dbget-bin/www_bget?ko:K01057">K01057</a>  PGLS, pgl, devB; 6-phosphogluconolactonase [EC:3.1.1.31]
D      comp54557_c0_seq1; <a href="/dbget-bin/www_bget?ko:K00033">K00033</a>  E1.1.1.44, PGD, gnd; 6-phosphogluconate dehydrogenase [EC:1.1.1.44]
D      comp56026_c0_seq1; <a href="/dbget-bin/www_bget?ko:K00033">K00033</a>  E1.1.1.44, PGD, gnd; 6-phosphogluconate dehydrogenase [EC:1.1.1.44]
D      comp93954_c0_seq1; <a href="/dbget-bin/www_bget?ko:K01601">K01601</a>  rbcL; ribulose-bisphosphate carboxylase large chain [EC:4.1.1.39]
D      comp48154_c0_seq1; <a href="/dbget-bin/www_bget?ko:K01602">K01602</a>  rbcS; ribulose-bisphosphate carboxylase small chain [EC:4.1.1.39]
D      comp51513_c0_seq2; <a href="/dbget-bin/www_bget?ko:K01602">K01602</a>  rbcS; ribulose-bisphosphate carboxylase small chain [EC:4.1.1.39]
D      comp47244_c0_seq1; <a href="/dbget-bin/www_bget?ko:K01807">K01807</a>  rpiA; ribose 5-phosphate isomerase A [EC:5.3.1.6]
D      comp47962_c0_seq1; <a href="/dbget-bin/www_bget?ko:K01807">K01807</a>  rpiA; ribose 5-phosphate isomerase A [EC:5.3.1.6]
D      comp56592_c0_seq8; <a href="/dbget-bin/www_bget?ko:K01807">K01807</a>  rpiA; ribose 5-phosphate isomerase A [EC:5.3.1.6]
D      comp53917_c1_seq1; <a href="/dbget-bin/www_bget?ko:K01803">K01803</a>  TPI, tpiA; triosephosphate isomerase (TIM) [EC:5.3.1.1]
D      comp58151_c0_seq1; <a href="/dbget-bin/www_bget?ko:K01803">K01803</a>  TPI, tpiA; triosephosphate isomerase (TIM) [EC:5.3.1.1]
D      comp41170_c0_seq1; <a href="/dbget-bin/www_bget?ko:K00616">K00616</a>  E2.2.1.2, talA, talB; transaldolase [EC:2.2.1.2]
D      comp46908_c0_seq1; <a href="/dbget-bin/www_bget?ko:K00616">K00616</a>  E2.2.1.2, talA, talB; transaldolase [EC:2.2.1.2]
D      comp48115_c0_seq1; <a href="/dbget-bin/www_bget?ko:K01689">K01689</a>  ENO, eno; enolase [EC:4.2.1.11]
D      comp52568_c0_seq1; <a href="/dbget-bin/www_bget?ko:K01689">K01689</a>  ENO, eno; enolase [EC:4.2.1.11]
D      comp55496_c1_seq2; <a href="/dbget-bin/www_bget?ko:K01689">K01689</a>  ENO, eno; enolase [EC:4.2.1.11]
D      comp60595_c0_seq1; <a href="/dbget-bin/www_bget?ko:K01689">K01689</a>  ENO, eno; enolase [EC:4.2.1.11]
D      comp15324_c1_seq1; <a href="/dbget-bin/www_bget?ko:K00873">K00873</a>  PK, pyk; pyruvate kinase [EC:2.7.1.40]
D      comp52264_c0_seq1; <a href="/dbget-bin/www_bget?ko:K00873">K00873</a>  PK, pyk; pyruvate kinase [EC:2.7.1.40]
D      comp55674_c1_seq3; <a href="/dbget-bin/www_bget?ko:K00873">K00873</a>  PK, pyk; pyruvate kinase [EC:2.7.1.40]
D      comp57064_c1_seq13; <a href="/dbget-bin/www_bget?ko:K00873">K00873</a>  PK, pyk; pyruvate kinase [EC:2.7.1.40]
D      comp59067_c0_seq12; <a href="/dbget-bin/www_bget?ko:K00873">K00873</a>  PK, pyk; pyruvate kinase [EC:2.7.1.40]
D      comp59134_c0_seq14; <a href="/dbget-bin/www_bget?ko:K00873">K00873</a>  PK, pyk; pyruvate kinase [EC:2.7.1.40]
D      comp59529_c0_seq4; <a href="/dbget-bin/www_bget?ko:K00873">K00873</a>  PK, pyk; pyruvate kinase [EC:2.7.1.40]
D      comp59921_c0_seq3; <a href="/dbget-bin/www_bget?ko:K01006">K01006</a>  ppdK; pyruvate,orthophosphate dikinase [EC:2.7.9.1]
D      comp55011_c0_seq1; <a href="/dbget-bin/www_bget?ko:K00161">K00161</a>  PDHA, pdhA; pyruvate dehydrogenase E1 component subunit alpha [EC:1.2.4.1]
D      comp57333_c0_seq1; <a href="/dbget-bin/www_bget?ko:K00161">K00161</a>  PDHA, pdhA; pyruvate dehydrogenase E1 component subunit alpha [EC:1.2.4.1]
D      comp49149_c0_seq4; <a href="/dbget-bin/www_bget?ko:K00162">K00162</a>  PDHB, pdhB; pyruvate dehydrogenase E1 component subunit beta [EC:1.2.4.1]
D      comp55676_c0_seq3; <a href="/dbget-bin/www_bget?ko:K00162">K00162</a>  PDHB, pdhB; pyruvate dehydrogenase E1 component subunit beta [EC:1.2.4.1]
D      comp55398_c0_seq3; <a href="/dbget-bin/www_bget?ko:K00627">K00627</a>  DLAT, aceF, pdhC; pyruvate dehydrogenase E2 component (dihydrolipoamide acetyltransferase) [EC:2.3.1.12]
D      comp56658_c0_seq3; <a href="/dbget-bin/www_bget?ko:K00627">K00627</a>  DLAT, aceF, pdhC; pyruvate dehydrogenase E2 component (dihydrolipoamide acetyltransferase) [EC:2.3.1.12]
D      comp58053_c1_seq5; <a href="/dbget-bin/www_bget?ko:K00627">K00627</a>  DLAT, aceF, pdhC; pyruvate dehydrogenase E2 component (dihydrolipoamide acetyltransferase) [EC:2.3.1.12]
D      comp56989_c0_seq1; <a href="/dbget-bin/www_bget?ko:K00382">K00382</a>  DLD, lpd, pdhD; dihydrolipoamide dehydrogenase [EC:1.8.1.4]
D      comp59443_c0_seq6; <a href="/dbget-bin/www_bget?ko:K00382">K00382</a>  DLD, lpd, pdhD; dihydrolipoamide dehydrogenase [EC:1.8.1.4]
D      comp59195_c0_seq1; <a href="/dbget-bin/www_bget?ko:K01595">K01595</a>  ppc; phosphoenolpyruvate carboxylase [EC:4.1.1.31]
D      comp59786_c0_seq2; <a href="/dbget-bin/www_bget?ko:K01595">K01595</a>  ppc; phosphoenolpyruvate carboxylase [EC:4.1.1.31]
D      comp51690_c0_seq1; <a href="/dbget-bin/www_bget?ko:K01647">K01647</a>  CS, gltA; citrate synthase [EC:2.3.3.1]
D      comp50573_c0_seq1; <a href="/dbget-bin/www_bget?ko:K00025">K00025</a>  MDH1; malate dehydrogenase [EC:1.1.1.37]
D      comp35210_c0_seq1; <a href="/dbget-bin/www_bget?ko:K00026">K00026</a>  MDH2; malate dehydrogenase [EC:1.1.1.37]
D      comp49324_c0_seq1; <a href="/dbget-bin/www_bget?ko:K00026">K00026</a>  MDH2; malate dehydrogenase [EC:1.1.1.37]
D      comp55544_c0_seq2; <a href="/dbget-bin/www_bget?ko:K00026">K00026</a>  MDH2; malate dehydrogenase [EC:1.1.1.37]
D      comp58280_c0_seq2; <a href="/dbget-bin/www_bget?ko:K00026">K00026</a>  MDH2; malate dehydrogenase [EC:1.1.1.37]
D      comp52714_c0_seq1; <a href="/dbget-bin/www_bget?ko:K01679">K01679</a>  E4.2.1.2B, fumC; fumarate hydratase, class II [EC:4.2.1.2]
D      comp56541_c0_seq1; <a href="/dbget-bin/www_bget?ko:K00234">K00234</a>  SDHA, SDH1; succinate dehydrogenase (ubiquinone) flavoprotein subunit [EC:1.3.5.1]
D      comp48752_c0_seq3; <a href="/dbget-bin/www_bget?ko:K00235">K00235</a>  SDHB, SDH2; succinate dehydrogenase (ubiquinone) iron-sulfur subunit [EC:1.3.5.1]
D      comp58703_c0_seq1; <a href="/dbget-bin/www_bget?ko:K01899">K01899</a>  LSC1; succinyl-CoA synthetase alpha subunit [EC:6.2.1.4 6.2.1.5]
D      comp56585_c0_seq1; <a href="/dbget-bin/www_bget?ko:K01900">K01900</a>  LSC2; succinyl-CoA synthetase beta subunit [EC:6.2.1.4 6.2.1.5]
D      comp49786_c0_seq1; <a href="/dbget-bin/www_bget?ko:K00031">K00031</a>  IDH1, IDH2, icd; isocitrate dehydrogenase [EC:1.1.1.42]
D      comp52337_c0_seq1; <a href="/dbget-bin/www_bget?ko:K00031">K00031</a>  IDH1, IDH2, icd; isocitrate dehydrogenase [EC:1.1.1.42]
D      comp50329_c1_seq1; <a href="/dbget-bin/www_bget?ko:K00030">K00030</a>  IDH3; isocitrate dehydrogenase (NAD+) [EC:1.1.1.41]
D      comp53279_c0_seq1; <a href="/dbget-bin/www_bget?ko:K00030">K00030</a>  IDH3; isocitrate dehydrogenase (NAD+) [EC:1.1.1.41]
D      comp59570_c0_seq1; <a href="/dbget-bin/www_bget?ko:K01681">K01681</a>  ACO, acnA; aconitate hydratase [EC:4.2.1.3]
D      comp59759_c0_seq2; <a href="/dbget-bin/www_bget?ko:K01681">K01681</a>  ACO, acnA; aconitate hydratase [EC:4.2.1.3]
D      comp53156_c0_seq1; <a href="/dbget-bin/www_bget?ko:K02160">K02160</a>  accB, bccP; acetyl-CoA carboxylase biotin carboxyl carrier protein
D      comp44215_c0_seq1; <a href="/dbget-bin/www_bget?ko:K01961">K01961</a>  accC; acetyl-CoA carboxylase, biotin carboxylase subunit [EC:6.4.1.2 6.3.4.14]
D      comp58271_c1_seq2; <a href="/dbget-bin/www_bget?ko:K01962">K01962</a>  accA; acetyl-CoA carboxylase carboxyl transferase subunit alpha [EC:6.4.1.2]
D      comp29918_c0_seq1; <a href="/dbget-bin/www_bget?ko:K01963">K01963</a>  accD; acetyl-CoA carboxylase carboxyl transferase subunit beta [EC:6.4.1.2]
D      comp55836_c0_seq2; <a href="/dbget-bin/www_bget?ko:K00626">K00626</a>  E2.3.1.9, atoB; acetyl-CoA C-acetyltransferase [EC:2.3.1.9]
D      comp58238_c0_seq1; <a href="/dbget-bin/www_bget?ko:K00626">K00626</a>  E2.3.1.9, atoB; acetyl-CoA C-acetyltransferase [EC:2.3.1.9]
D      comp57990_c0_seq3; <a href="/dbget-bin/www_bget?ko:K00830">K00830</a>  AGXT; alanine-glyoxylate transaminase / serine-glyoxylate transaminase / serine-pyruvate transaminase [EC:2.6.1.44 2.6.1.45 2.6.1.51]
D      comp57702_c0_seq3; <a href="/dbget-bin/www_bget?ko:K00058">K00058</a>  serA, PHGDH; D-3-phosphoglycerate dehydrogenase [EC:1.1.1.95]
D      comp55250_c0_seq1; <a href="/dbget-bin/www_bget?ko:K00831">K00831</a>  serC, PSAT1; phosphoserine aminotransferase [EC:2.6.1.52]
D      comp23519_c0_seq1; <a href="/dbget-bin/www_bget?ko:K01079">K01079</a>  serB, PSPH; phosphoserine phosphatase [EC:3.1.3.3]
D      comp54510_c0_seq1; <a href="/dbget-bin/www_bget?ko:K00600">K00600</a>  glyA, SHMT; glycine hydroxymethyltransferase [EC:2.1.2.1]
D      comp56200_c0_seq1; <a href="/dbget-bin/www_bget?ko:K00600">K00600</a>  glyA, SHMT; glycine hydroxymethyltransferase [EC:2.1.2.1]
D      comp56514_c0_seq1; <a href="/dbget-bin/www_bget?ko:K00600">K00600</a>  glyA, SHMT; glycine hydroxymethyltransferase [EC:2.1.2.1]
D      comp58011_c1_seq1; <a href="/dbget-bin/www_bget?ko:K00600">K00600</a>  glyA, SHMT; glycine hydroxymethyltransferase [EC:2.1.2.1]
D      comp55395_c0_seq1; <a href="/dbget-bin/www_bget?ko:K01938">K01938</a>  fhs; formate--tetrahydrofolate ligase [EC:6.3.4.3]
D      comp60433_c0_seq1; <a href="/dbget-bin/www_bget?ko:K00297">K00297</a>  metF, MTHFR; methylenetetrahydrofolate reductase (NADPH) [EC:1.5.1.20]
D      comp211117_c0_seq1; <a href="/dbget-bin/www_bget?ko:K01637">K01637</a>  E4.1.3.1, aceA; isocitrate lyase [EC:4.1.3.1]
D      comp48339_c0_seq2; <a href="/dbget-bin/www_bget?ko:K00948">K00948</a>  PRPS, prsA; ribose-phosphate pyrophosphokinase [EC:2.7.6.1]
D      comp8055_c0_seq1; <a href="/dbget-bin/www_bget?ko:K01754">K01754</a>  E4.3.1.19, ilvA, tdcB; threonine dehydratase [EC:4.3.1.19]
D      comp59987_c0_seq2; <a href="/dbget-bin/www_bget?ko:K00281">K00281</a>  GLDC, gcvP; glycine dehydrogenase [EC:1.4.4.2]
D      comp57653_c0_seq2; <a href="/dbget-bin/www_bget?ko:K00605">K00605</a>  gcvT, AMT; aminomethyltransferase [EC:2.1.2.10]
D      comp50636_c0_seq1; <a href="/dbget-bin/www_bget?ko:K01455">K01455</a>  E3.5.1.49; formamidase [EC:3.5.1.49]
D      comp32193_c0_seq3; <a href="/dbget-bin/www_bget?ko:K00121">K00121</a>  frmA, ADH5, adhC; S-(hydroxymethyl)glutathione dehydrogenase / alcohol dehydrogenase [EC:1.1.1.284 1.1.1.1]
D      comp55546_c0_seq1; <a href="/dbget-bin/www_bget?ko:K00121">K00121</a>  frmA, ADH5, adhC; S-(hydroxymethyl)glutathione dehydrogenase / alcohol dehydrogenase [EC:1.1.1.284 1.1.1.1]
D      comp59166_c0_seq7; <a href="/dbget-bin/www_bget?ko:K01070">K01070</a>  frmB, ESD, fghA; S-formylglutathione hydrolase [EC:3.1.2.12]
D      comp41702_c0_seq1; <a href="/dbget-bin/www_bget?ko:K00122">K00122</a>  FDH; formate dehydrogenase [EC:1.2.1.2]
D      comp52345_c0_seq1; <a href="/dbget-bin/www_bget?ko:K00640">K00640</a>  cysE; serine O-acetyltransferase [EC:2.3.1.30]
D      comp53425_c0_seq1; <a href="/dbget-bin/www_bget?ko:K00640">K00640</a>  cysE; serine O-acetyltransferase [EC:2.3.1.30]
D      comp55766_c0_seq9; <a href="/dbget-bin/www_bget?ko:K00640">K00640</a>  cysE; serine O-acetyltransferase [EC:2.3.1.30]
D      comp42883_c0_seq2; <a href="/dbget-bin/www_bget?ko:K01738">K01738</a>  cysK; cysteine synthase A [EC:2.5.1.47]
D      comp49825_c0_seq1; <a href="/dbget-bin/www_bget?ko:K01738">K01738</a>  cysK; cysteine synthase A [EC:2.5.1.47]
D      comp53009_c0_seq1; <a href="/dbget-bin/www_bget?ko:K01738">K01738</a>  cysK; cysteine synthase A [EC:2.5.1.47]
D      comp57097_c1_seq1; <a href="/dbget-bin/www_bget?ko:K01738">K01738</a>  cysK; cysteine synthase A [EC:2.5.1.47]
D      comp47308_c0_seq2; <a href="/dbget-bin/www_bget?ko:K13034">K13034</a>  ATCYSC1; L-3-cyanoalanine synthase/ cysteine synthase [EC:2.5.1.47 4.4.1.9]
D      comp54734_c0_seq1; <a href="/dbget-bin/www_bget?ko:K01895">K01895</a>  ACSS, acs; acetyl-CoA synthetase [EC:6.2.1.1]
D      comp54468_c0_seq1; <a href="/dbget-bin/www_bget?ko:K00164">K00164</a>  OGDH, sucA; 2-oxoglutarate dehydrogenase E1 component [EC:1.2.4.2]
D      comp57397_c0_seq3; <a href="/dbget-bin/www_bget?ko:K00658">K00658</a>  DLST, sucB; 2-oxoglutarate dehydrogenase E2 component (dihydrolipoamide succinyltransferase) [EC:2.3.1.61]
D      comp57803_c1_seq3; <a href="/dbget-bin/www_bget?ko:K00658">K00658</a>  DLST, sucB; 2-oxoglutarate dehydrogenase E2 component (dihydrolipoamide succinyltransferase) [EC:2.3.1.61]
D      comp51667_c0_seq1; <a href="/dbget-bin/www_bget?ko:K00028">K00028</a>  E1.1.1.39; malate dehydrogenase (decarboxylating) [EC:1.1.1.39]
D      comp58682_c0_seq5; <a href="/dbget-bin/www_bget?ko:K00028">K00028</a>  E1.1.1.39; malate dehydrogenase (decarboxylating) [EC:1.1.1.39]
D      comp46119_c0_seq2; <a href="/dbget-bin/www_bget?ko:K00029">K00029</a>  E1.1.1.40, maeB; malate dehydrogenase (oxaloacetate-decarboxylating)(NADP+) [EC:1.1.1.40]
D      comp58776_c0_seq5; <a href="/dbget-bin/www_bget?ko:K00029">K00029</a>  E1.1.1.40, maeB; malate dehydrogenase (oxaloacetate-decarboxylating)(NADP+) [EC:1.1.1.40]
D      comp49178_c0_seq1; <a href="/dbget-bin/www_bget?ko:K00851">K00851</a>  E2.7.1.12, gntK, idnK; gluconokinase [EC:2.7.1.12]
C    01210 2-Oxocarboxylic acid metabolism [PATH:<a href="http://www.kegg.jp/kegg-bin/show_pathway?@ko01210/K01647/K01681/K00031/K00030/K14454/K14455/K00811/K00928/K00133/K00814/K14272/K00620/K14682/K00145/K00818/K01438/K14677/K01703/K01704/K00052/K01652/K01653/K00053/K01687/K00826/K01649/K11818/K11812">ko01210</a>]
D      comp51690_c0_seq1; <a href="/dbget-bin/www_bget?ko:K01647">K01647</a>  CS, gltA; citrate synthase [EC:2.3.3.1]
D      comp59570_c0_seq1; <a href="/dbget-bin/www_bget?ko:K01681">K01681</a>  ACO, acnA; aconitate hydratase [EC:4.2.1.3]
D      comp59759_c0_seq2; <a href="/dbget-bin/www_bget?ko:K01681">K01681</a>  ACO, acnA; aconitate hydratase [EC:4.2.1.3]
D      comp49786_c0_seq1; <a href="/dbget-bin/www_bget?ko:K00031">K00031</a>  IDH1, IDH2, icd; isocitrate dehydrogenase [EC:1.1.1.42]
D      comp52337_c0_seq1; <a href="/dbget-bin/www_bget?ko:K00031">K00031</a>  IDH1, IDH2, icd; isocitrate dehydrogenase [EC:1.1.1.42]
D      comp50329_c1_seq1; <a href="/dbget-bin/www_bget?ko:K00030">K00030</a>  IDH3; isocitrate dehydrogenase (NAD+) [EC:1.1.1.41]
D      comp53279_c0_seq1; <a href="/dbget-bin/www_bget?ko:K00030">K00030</a>  IDH3; isocitrate dehydrogenase (NAD+) [EC:1.1.1.41]
D      comp44326_c0_seq1; <a href="/dbget-bin/www_bget?ko:K14454">K14454</a>  GOT1; aspartate aminotransferase, cytoplasmic [EC:2.6.1.1]
D      comp52813_c2_seq3; <a href="/dbget-bin/www_bget?ko:K14455">K14455</a>  GOT2; aspartate aminotransferase, mitochondrial [EC:2.6.1.1]
D      comp41956_c0_seq1; <a href="/dbget-bin/www_bget?ko:K00811">K00811</a>  ASP5; aspartate aminotransferase, chloroplastic [EC:2.6.1.1]
D      comp56789_c2_seq1; <a href="/dbget-bin/www_bget?ko:K00928">K00928</a>  lysC; aspartate kinase [EC:2.7.2.4]
D      comp63552_c0_seq1; <a href="/dbget-bin/www_bget?ko:K00133">K00133</a>  asd; aspartate-semialdehyde dehydrogenase [EC:1.2.1.11]
D      comp57824_c0_seq1; <a href="/dbget-bin/www_bget?ko:K00814">K00814</a>  GPT, ALT; alanine transaminase [EC:2.6.1.2]
D      comp57880_c0_seq2; <a href="/dbget-bin/www_bget?ko:K14272">K14272</a>  GGAT; glutamate--glyoxylate aminotransferase [EC:2.6.1.4 2.6.1.2 2.6.1.44 2.6.1.-]
D      comp53400_c0_seq7; <a href="/dbget-bin/www_bget?ko:K00620">K00620</a>  argJ; glutamate N-acetyltransferase / amino-acid N-acetyltransferase [EC:2.3.1.35 2.3.1.1]
D      comp57966_c0_seq3; <a href="/dbget-bin/www_bget?ko:K14682">K14682</a>  argAB; amino-acid N-acetyltransferase [EC:2.3.1.1]
D      comp54273_c0_seq2; <a href="/dbget-bin/www_bget?ko:K00145">K00145</a>  argC; N-acetyl-gamma-glutamyl-phosphate reductase [EC:1.2.1.38]
D      comp56172_c0_seq7; <a href="/dbget-bin/www_bget?ko:K00818">K00818</a>  E2.6.1.11, argD; acetylornithine aminotransferase [EC:2.6.1.11]
D      comp56189_c0_seq4; <a href="/dbget-bin/www_bget?ko:K01438">K01438</a>  argE; acetylornithine deacetylase [EC:3.5.1.16]
D      comp51713_c0_seq1; <a href="/dbget-bin/www_bget?ko:K14677">K14677</a>  ACY1; aminoacylase [EC:3.5.1.14]
D      comp54367_c0_seq1; <a href="/dbget-bin/www_bget?ko:K14677">K14677</a>  ACY1; aminoacylase [EC:3.5.1.14]
D      comp41778_c0_seq1; <a href="/dbget-bin/www_bget?ko:K01703">K01703</a>  leuC; 3-isopropylmalate/(R)-2-methylmalate dehydratase large subunit [EC:4.2.1.33 4.2.1.35]
D      comp53091_c0_seq1; <a href="/dbget-bin/www_bget?ko:K01704">K01704</a>  leuD; 3-isopropylmalate/(R)-2-methylmalate dehydratase small subunit [EC:4.2.1.33 4.2.1.35]
D      comp27679_c0_seq1; <a href="/dbget-bin/www_bget?ko:K00052">K00052</a>  leuB; 3-isopropylmalate dehydrogenase [EC:1.1.1.85]
D      comp57192_c0_seq2; <a href="/dbget-bin/www_bget?ko:K01652">K01652</a>  E2.2.1.6L, ilvB, ilvG, ilvI; acetolactate synthase I/II/III large subunit [EC:2.2.1.6]
D      comp54908_c3_seq1; <a href="/dbget-bin/www_bget?ko:K01653">K01653</a>  E2.2.1.6S, ilvH, ilvN; acetolactate synthase I/III small subunit [EC:2.2.1.6]
D      comp58205_c0_seq2; <a href="/dbget-bin/www_bget?ko:K00053">K00053</a>  ilvC; ketol-acid reductoisomerase [EC:1.1.1.86]
D      comp45451_c0_seq4; <a href="/dbget-bin/www_bget?ko:K01687">K01687</a>  ilvD; dihydroxy-acid dehydratase [EC:4.2.1.9]
D      comp36700_c0_seq1; <a href="/dbget-bin/www_bget?ko:K00826">K00826</a>  E2.6.1.42, ilvE; branched-chain amino acid aminotransferase [EC:2.6.1.42]
D      comp44263_c0_seq2; <a href="/dbget-bin/www_bget?ko:K00826">K00826</a>  E2.6.1.42, ilvE; branched-chain amino acid aminotransferase [EC:2.6.1.42]
D      comp46288_c0_seq2; <a href="/dbget-bin/www_bget?ko:K00826">K00826</a>  E2.6.1.42, ilvE; branched-chain amino acid aminotransferase [EC:2.6.1.42]
D      comp52365_c1_seq1; <a href="/dbget-bin/www_bget?ko:K00826">K00826</a>  E2.6.1.42, ilvE; branched-chain amino acid aminotransferase [EC:2.6.1.42]
D      comp57777_c1_seq1; <a href="/dbget-bin/www_bget?ko:K00826">K00826</a>  E2.6.1.42, ilvE; branched-chain amino acid aminotransferase [EC:2.6.1.42]
D      comp50553_c0_seq3; <a href="/dbget-bin/www_bget?ko:K01649">K01649</a>  leuA; 2-isopropylmalate synthase [EC:2.3.3.13]
D      comp53580_c0_seq1; <a href="/dbget-bin/www_bget?ko:K11818">K11818</a>  CYP83B1; cytochrome P450, family 83, subfamily B, polypeptide 1 [EC:1.14.-.-]
D      comp57249_c0_seq3; <a href="/dbget-bin/www_bget?ko:K11818">K11818</a>  CYP83B1; cytochrome P450, family 83, subfamily B, polypeptide 1 [EC:1.14.-.-]
D      comp142585_c0_seq1; <a href="/dbget-bin/www_bget?ko:K11812">K11812</a>  CYP79B2; cytochrome P450, family 79, subfamily B, polypeptide 2 (tryptophan N-monooxygenase) [EC:1.14.13.125]
C    01230 Biosynthesis of amino acids [PATH:<a href="http://www.kegg.jp/kegg-bin/show_pathway?@ko01230/K01803/K00134/K00927/K01834/K15633/K15634/K01689/K00873/K01623/K00850/K00615/K01783/K01807/K00948/K01703/K01704/K00052/K01652/K01653/K00053/K01687/K00826/K01649/K01754/K00600/K01620/K00058/K00831/K01079/K00640/K01738/K13034/K01733/K00872/K12524/K00133/K00928/K14454/K14455/K00811/K01739/K01760/K00549/K01647/K01681/K00031/K00030/K00814/K14272/K00620/K14682/K00145/K00818/K01438/K14677/K00611/K01940/K01755/K01476/K12657/K00286/K14085/K01714/K01915/K00215/K10206/K01778/K01586/K00264/K00616/K00765/K01814/K01693/K00817/K01663/K00013/K01626/K01735/K13832/K00891/K00800/K01736/K01850/K00815/K05359/K01657/K01658/K00766/K01817/K01609/K01695/K01696/K06001/K15849/K15227">ko01230</a>]
D      comp53917_c1_seq1; <a href="/dbget-bin/www_bget?ko:K01803">K01803</a>  TPI, tpiA; triosephosphate isomerase (TIM) [EC:5.3.1.1]
D      comp58151_c0_seq1; <a href="/dbget-bin/www_bget?ko:K01803">K01803</a>  TPI, tpiA; triosephosphate isomerase (TIM) [EC:5.3.1.1]
D      comp53977_c0_seq1; <a href="/dbget-bin/www_bget?ko:K00134">K00134</a>  GAPDH, gapA; glyceraldehyde 3-phosphate dehydrogenase [EC:1.2.1.12]
D      comp79792_c0_seq1; <a href="/dbget-bin/www_bget?ko:K00134">K00134</a>  GAPDH, gapA; glyceraldehyde 3-phosphate dehydrogenase [EC:1.2.1.12]
D      comp43783_c0_seq1; <a href="/dbget-bin/www_bget?ko:K00927">K00927</a>  PGK, pgk; phosphoglycerate kinase [EC:2.7.2.3]
D      comp57359_c0_seq1; <a href="/dbget-bin/www_bget?ko:K01834">K01834</a>  PGAM, gpmA; 2,3-bisphosphoglycerate-dependent phosphoglycerate mutase [EC:5.4.2.1]
D      comp56438_c0_seq1; <a href="/dbget-bin/www_bget?ko:K15633">K15633</a>  gpmI; 2,3-bisphosphoglycerate-independent phosphoglycerate mutase [EC:5.4.2.1]
D      comp51488_c0_seq1; <a href="/dbget-bin/www_bget?ko:K15634">K15634</a>  gpmB; probable phosphoglycerate mutase [EC:5.4.2.1]
D      comp53729_c0_seq17; <a href="/dbget-bin/www_bget?ko:K15634">K15634</a>  gpmB; probable phosphoglycerate mutase [EC:5.4.2.1]
D      comp48115_c0_seq1; <a href="/dbget-bin/www_bget?ko:K01689">K01689</a>  ENO, eno; enolase [EC:4.2.1.11]
D      comp52568_c0_seq1; <a href="/dbget-bin/www_bget?ko:K01689">K01689</a>  ENO, eno; enolase [EC:4.2.1.11]
D      comp55496_c1_seq2; <a href="/dbget-bin/www_bget?ko:K01689">K01689</a>  ENO, eno; enolase [EC:4.2.1.11]
D      comp60595_c0_seq1; <a href="/dbget-bin/www_bget?ko:K01689">K01689</a>  ENO, eno; enolase [EC:4.2.1.11]
D      comp15324_c1_seq1; <a href="/dbget-bin/www_bget?ko:K00873">K00873</a>  PK, pyk; pyruvate kinase [EC:2.7.1.40]
D      comp52264_c0_seq1; <a href="/dbget-bin/www_bget?ko:K00873">K00873</a>  PK, pyk; pyruvate kinase [EC:2.7.1.40]
D      comp55674_c1_seq3; <a href="/dbget-bin/www_bget?ko:K00873">K00873</a>  PK, pyk; pyruvate kinase [EC:2.7.1.40]
D      comp57064_c1_seq13; <a href="/dbget-bin/www_bget?ko:K00873">K00873</a>  PK, pyk; pyruvate kinase [EC:2.7.1.40]
D      comp59067_c0_seq12; <a href="/dbget-bin/www_bget?ko:K00873">K00873</a>  PK, pyk; pyruvate kinase [EC:2.7.1.40]
D      comp59134_c0_seq14; <a href="/dbget-bin/www_bget?ko:K00873">K00873</a>  PK, pyk; pyruvate kinase [EC:2.7.1.40]
D      comp59529_c0_seq4; <a href="/dbget-bin/www_bget?ko:K00873">K00873</a>  PK, pyk; pyruvate kinase [EC:2.7.1.40]
D      comp55587_c0_seq2; <a href="/dbget-bin/www_bget?ko:K01623">K01623</a>  ALDO; fructose-bisphosphate aldolase, class I [EC:4.1.2.13]
D      comp56171_c0_seq5; <a href="/dbget-bin/www_bget?ko:K01623">K01623</a>  ALDO; fructose-bisphosphate aldolase, class I [EC:4.1.2.13]
D      comp56625_c2_seq1; <a href="/dbget-bin/www_bget?ko:K01623">K01623</a>  ALDO; fructose-bisphosphate aldolase, class I [EC:4.1.2.13]
D      comp48562_c1_seq4; <a href="/dbget-bin/www_bget?ko:K00850">K00850</a>  pfkA, PFK; 6-phosphofructokinase 1 [EC:2.7.1.11]
D      comp49838_c0_seq1; <a href="/dbget-bin/www_bget?ko:K00850">K00850</a>  pfkA, PFK; 6-phosphofructokinase 1 [EC:2.7.1.11]
D      comp55737_c1_seq1; <a href="/dbget-bin/www_bget?ko:K00850">K00850</a>  pfkA, PFK; 6-phosphofructokinase 1 [EC:2.7.1.11]
D      comp58144_c0_seq2; <a href="/dbget-bin/www_bget?ko:K00850">K00850</a>  pfkA, PFK; 6-phosphofructokinase 1 [EC:2.7.1.11]
D      comp58063_c1_seq3; <a href="/dbget-bin/www_bget?ko:K00615">K00615</a>  E2.2.1.1, tktA, tktB; transketolase [EC:2.2.1.1]
D      comp52012_c0_seq17; <a href="/dbget-bin/www_bget?ko:K01783">K01783</a>  rpe, RPE; ribulose-phosphate 3-epimerase [EC:5.1.3.1]
D      comp56499_c0_seq1; <a href="/dbget-bin/www_bget?ko:K01783">K01783</a>  rpe, RPE; ribulose-phosphate 3-epimerase [EC:5.1.3.1]
D      comp47244_c0_seq1; <a href="/dbget-bin/www_bget?ko:K01807">K01807</a>  rpiA; ribose 5-phosphate isomerase A [EC:5.3.1.6]
D      comp47962_c0_seq1; <a href="/dbget-bin/www_bget?ko:K01807">K01807</a>  rpiA; ribose 5-phosphate isomerase A [EC:5.3.1.6]
D      comp56592_c0_seq8; <a href="/dbget-bin/www_bget?ko:K01807">K01807</a>  rpiA; ribose 5-phosphate isomerase A [EC:5.3.1.6]
D      comp48339_c0_seq2; <a href="/dbget-bin/www_bget?ko:K00948">K00948</a>  PRPS, prsA; ribose-phosphate pyrophosphokinase [EC:2.7.6.1]
D      comp41778_c0_seq1; <a href="/dbget-bin/www_bget?ko:K01703">K01703</a>  leuC; 3-isopropylmalate/(R)-2-methylmalate dehydratase large subunit [EC:4.2.1.33 4.2.1.35]
D      comp53091_c0_seq1; <a href="/dbget-bin/www_bget?ko:K01704">K01704</a>  leuD; 3-isopropylmalate/(R)-2-methylmalate dehydratase small subunit [EC:4.2.1.33 4.2.1.35]
D      comp27679_c0_seq1; <a href="/dbget-bin/www_bget?ko:K00052">K00052</a>  leuB; 3-isopropylmalate dehydrogenase [EC:1.1.1.85]
D      comp57192_c0_seq2; <a href="/dbget-bin/www_bget?ko:K01652">K01652</a>  E2.2.1.6L, ilvB, ilvG, ilvI; acetolactate synthase I/II/III large subunit [EC:2.2.1.6]
D      comp54908_c3_seq1; <a href="/dbget-bin/www_bget?ko:K01653">K01653</a>  E2.2.1.6S, ilvH, ilvN; acetolactate synthase I/III small subunit [EC:2.2.1.6]
D      comp58205_c0_seq2; <a href="/dbget-bin/www_bget?ko:K00053">K00053</a>  ilvC; ketol-acid reductoisomerase [EC:1.1.1.86]
D      comp45451_c0_seq4; <a href="/dbget-bin/www_bget?ko:K01687">K01687</a>  ilvD; dihydroxy-acid dehydratase [EC:4.2.1.9]
D      comp36700_c0_seq1; <a href="/dbget-bin/www_bget?ko:K00826">K00826</a>  E2.6.1.42, ilvE; branched-chain amino acid aminotransferase [EC:2.6.1.42]
D      comp44263_c0_seq2; <a href="/dbget-bin/www_bget?ko:K00826">K00826</a>  E2.6.1.42, ilvE; branched-chain amino acid aminotransferase [EC:2.6.1.42]
D      comp46288_c0_seq2; <a href="/dbget-bin/www_bget?ko:K00826">K00826</a>  E2.6.1.42, ilvE; branched-chain amino acid aminotransferase [EC:2.6.1.42]
D      comp52365_c1_seq1; <a href="/dbget-bin/www_bget?ko:K00826">K00826</a>  E2.6.1.42, ilvE; branched-chain amino acid aminotransferase [EC:2.6.1.42]
D      comp57777_c1_seq1; <a href="/dbget-bin/www_bget?ko:K00826">K00826</a>  E2.6.1.42, ilvE; branched-chain amino acid aminotransferase [EC:2.6.1.42]
D      comp50553_c0_seq3; <a href="/dbget-bin/www_bget?ko:K01649">K01649</a>  leuA; 2-isopropylmalate synthase [EC:2.3.3.13]
D      comp8055_c0_seq1; <a href="/dbget-bin/www_bget?ko:K01754">K01754</a>  E4.3.1.19, ilvA, tdcB; threonine dehydratase [EC:4.3.1.19]
D      comp54510_c0_seq1; <a href="/dbget-bin/www_bget?ko:K00600">K00600</a>  glyA, SHMT; glycine hydroxymethyltransferase [EC:2.1.2.1]
D      comp56200_c0_seq1; <a href="/dbget-bin/www_bget?ko:K00600">K00600</a>  glyA, SHMT; glycine hydroxymethyltransferase [EC:2.1.2.1]
D      comp56514_c0_seq1; <a href="/dbget-bin/www_bget?ko:K00600">K00600</a>  glyA, SHMT; glycine hydroxymethyltransferase [EC:2.1.2.1]
D      comp58011_c1_seq1; <a href="/dbget-bin/www_bget?ko:K00600">K00600</a>  glyA, SHMT; glycine hydroxymethyltransferase [EC:2.1.2.1]
D      comp56886_c0_seq2; <a href="/dbget-bin/www_bget?ko:K01620">K01620</a>  ltaE; threonine aldolase [EC:4.1.2.5]
D      comp57702_c0_seq3; <a href="/dbget-bin/www_bget?ko:K00058">K00058</a>  serA, PHGDH; D-3-phosphoglycerate dehydrogenase [EC:1.1.1.95]
D      comp55250_c0_seq1; <a href="/dbget-bin/www_bget?ko:K00831">K00831</a>  serC, PSAT1; phosphoserine aminotransferase [EC:2.6.1.52]
D      comp23519_c0_seq1; <a href="/dbget-bin/www_bget?ko:K01079">K01079</a>  serB, PSPH; phosphoserine phosphatase [EC:3.1.3.3]
D      comp52345_c0_seq1; <a href="/dbget-bin/www_bget?ko:K00640">K00640</a>  cysE; serine O-acetyltransferase [EC:2.3.1.30]
D      comp53425_c0_seq1; <a href="/dbget-bin/www_bget?ko:K00640">K00640</a>  cysE; serine O-acetyltransferase [EC:2.3.1.30]
D      comp55766_c0_seq9; <a href="/dbget-bin/www_bget?ko:K00640">K00640</a>  cysE; serine O-acetyltransferase [EC:2.3.1.30]
D      comp42883_c0_seq2; <a href="/dbget-bin/www_bget?ko:K01738">K01738</a>  cysK; cysteine synthase A [EC:2.5.1.47]
D      comp49825_c0_seq1; <a href="/dbget-bin/www_bget?ko:K01738">K01738</a>  cysK; cysteine synthase A [EC:2.5.1.47]
D      comp53009_c0_seq1; <a href="/dbget-bin/www_bget?ko:K01738">K01738</a>  cysK; cysteine synthase A [EC:2.5.1.47]
D      comp57097_c1_seq1; <a href="/dbget-bin/www_bget?ko:K01738">K01738</a>  cysK; cysteine synthase A [EC:2.5.1.47]
D      comp47308_c0_seq2; <a href="/dbget-bin/www_bget?ko:K13034">K13034</a>  ATCYSC1; L-3-cyanoalanine synthase/ cysteine synthase [EC:2.5.1.47 4.4.1.9]
D      comp58626_c0_seq4; <a href="/dbget-bin/www_bget?ko:K01733">K01733</a>  thrC; threonine synthase [EC:4.2.3.1]
D      comp53251_c1_seq4; <a href="/dbget-bin/www_bget?ko:K00872">K00872</a>  thrB1; homoserine kinase [EC:2.7.1.39]
D      comp58732_c0_seq2; <a href="/dbget-bin/www_bget?ko:K12524">K12524</a>  thrA; bifunctional aspartokinase / homoserine dehydrogenase 1 [EC:2.7.2.4 1.1.1.3]
D      comp63552_c0_seq1; <a href="/dbget-bin/www_bget?ko:K00133">K00133</a>  asd; aspartate-semialdehyde dehydrogenase [EC:1.2.1.11]
D      comp56789_c2_seq1; <a href="/dbget-bin/www_bget?ko:K00928">K00928</a>  lysC; aspartate kinase [EC:2.7.2.4]
D      comp44326_c0_seq1; <a href="/dbget-bin/www_bget?ko:K14454">K14454</a>  GOT1; aspartate aminotransferase, cytoplasmic [EC:2.6.1.1]
D      comp52813_c2_seq3; <a href="/dbget-bin/www_bget?ko:K14455">K14455</a>  GOT2; aspartate aminotransferase, mitochondrial [EC:2.6.1.1]
D      comp41956_c0_seq1; <a href="/dbget-bin/www_bget?ko:K00811">K00811</a>  ASP5; aspartate aminotransferase, chloroplastic [EC:2.6.1.1]
D      comp57840_c0_seq1; <a href="/dbget-bin/www_bget?ko:K01739">K01739</a>  metB; cystathionine gamma-synthase [EC:2.5.1.48]
D      comp58813_c0_seq9; <a href="/dbget-bin/www_bget?ko:K01760">K01760</a>  metC; cystathionine beta-lyase [EC:4.4.1.8]
D      comp59437_c0_seq5; <a href="/dbget-bin/www_bget?ko:K00549">K00549</a>  metE; 5-methyltetrahydropteroyltriglutamate--homocysteine methyltransferase [EC:2.1.1.14]
D      comp51690_c0_seq1; <a href="/dbget-bin/www_bget?ko:K01647">K01647</a>  CS, gltA; citrate synthase [EC:2.3.3.1]
D      comp59570_c0_seq1; <a href="/dbget-bin/www_bget?ko:K01681">K01681</a>  ACO, acnA; aconitate hydratase [EC:4.2.1.3]
D      comp59759_c0_seq2; <a href="/dbget-bin/www_bget?ko:K01681">K01681</a>  ACO, acnA; aconitate hydratase [EC:4.2.1.3]
D      comp49786_c0_seq1; <a href="/dbget-bin/www_bget?ko:K00031">K00031</a>  IDH1, IDH2, icd; isocitrate dehydrogenase [EC:1.1.1.42]
D      comp52337_c0_seq1; <a href="/dbget-bin/www_bget?ko:K00031">K00031</a>  IDH1, IDH2, icd; isocitrate dehydrogenase [EC:1.1.1.42]
D      comp50329_c1_seq1; <a href="/dbget-bin/www_bget?ko:K00030">K00030</a>  IDH3; isocitrate dehydrogenase (NAD+) [EC:1.1.1.41]
D      comp53279_c0_seq1; <a href="/dbget-bin/www_bget?ko:K00030">K00030</a>  IDH3; isocitrate dehydrogenase (NAD+) [EC:1.1.1.41]
D      comp57824_c0_seq1; <a href="/dbget-bin/www_bget?ko:K00814">K00814</a>  GPT, ALT; alanine transaminase [EC:2.6.1.2]
D      comp57880_c0_seq2; <a href="/dbget-bin/www_bget?ko:K14272">K14272</a>  GGAT; glutamate--glyoxylate aminotransferase [EC:2.6.1.4 2.6.1.2 2.6.1.44 2.6.1.-]
D      comp53400_c0_seq7; <a href="/dbget-bin/www_bget?ko:K00620">K00620</a>  argJ; glutamate N-acetyltransferase / amino-acid N-acetyltransferase [EC:2.3.1.35 2.3.1.1]
D      comp57966_c0_seq3; <a href="/dbget-bin/www_bget?ko:K14682">K14682</a>  argAB; amino-acid N-acetyltransferase [EC:2.3.1.1]
D      comp54273_c0_seq2; <a href="/dbget-bin/www_bget?ko:K00145">K00145</a>  argC; N-acetyl-gamma-glutamyl-phosphate reductase [EC:1.2.1.38]
D      comp56172_c0_seq7; <a href="/dbget-bin/www_bget?ko:K00818">K00818</a>  E2.6.1.11, argD; acetylornithine aminotransferase [EC:2.6.1.11]
D      comp56189_c0_seq4; <a href="/dbget-bin/www_bget?ko:K01438">K01438</a>  argE; acetylornithine deacetylase [EC:3.5.1.16]
D      comp51713_c0_seq1; <a href="/dbget-bin/www_bget?ko:K14677">K14677</a>  ACY1; aminoacylase [EC:3.5.1.14]
D      comp54367_c0_seq1; <a href="/dbget-bin/www_bget?ko:K14677">K14677</a>  ACY1; aminoacylase [EC:3.5.1.14]
D      comp54304_c0_seq1; <a href="/dbget-bin/www_bget?ko:K00611">K00611</a>  OTC, argF, argI; ornithine carbamoyltransferase [EC:2.1.3.3]
D      comp58067_c0_seq2; <a href="/dbget-bin/www_bget?ko:K01940">K01940</a>  E6.3.4.5, argG; argininosuccinate synthase [EC:6.3.4.5]
D      comp53899_c0_seq1; <a href="/dbget-bin/www_bget?ko:K01755">K01755</a>  argH, ASL; argininosuccinate lyase [EC:4.3.2.1]
D      comp47914_c0_seq1; <a href="/dbget-bin/www_bget?ko:K01476">K01476</a>  E3.5.3.1, rocF, arg; arginase [EC:3.5.3.1]
D      comp59376_c0_seq20; <a href="/dbget-bin/www_bget?ko:K12657">K12657</a>  ALDH18A1, P5CS; delta-1-pyrroline-5-carboxylate synthetase [EC:2.7.2.11 1.2.1.41]
D      comp49877_c2_seq1; <a href="/dbget-bin/www_bget?ko:K00286">K00286</a>  E1.5.1.2, proC; pyrroline-5-carboxylate reductase [EC:1.5.1.2]
D      comp59070_c0_seq1; <a href="/dbget-bin/www_bget?ko:K14085">K14085</a>  ALDH7A1; aldehyde dehydrogenase family 7 member A1 [EC:1.2.1.31 1.2.1.8 1.2.1.3]
D      comp57756_c0_seq1; <a href="/dbget-bin/www_bget?ko:K01714">K01714</a>  dapA; 4-hydroxy-tetrahydrodipicolinate synthase [EC:4.3.3.7]
D      comp43799_c0_seq1; <a href="/dbget-bin/www_bget?ko:K01915">K01915</a>  glnA; glutamine synthetase [EC:6.3.1.2]
D      comp54256_c0_seq1; <a href="/dbget-bin/www_bget?ko:K01915">K01915</a>  glnA; glutamine synthetase [EC:6.3.1.2]
D      comp54804_c1_seq7; <a href="/dbget-bin/www_bget?ko:K00215">K00215</a>  dapB; 4-hydroxy-tetrahydrodipicolinate reductase [EC:1.17.1.8]
D      comp52899_c0_seq4; <a href="/dbget-bin/www_bget?ko:K10206">K10206</a>  E2.6.1.83; LL-diaminopimelate aminotransferase [EC:2.6.1.83]
D      comp61090_c0_seq1; <a href="/dbget-bin/www_bget?ko:K10206">K10206</a>  E2.6.1.83; LL-diaminopimelate aminotransferase [EC:2.6.1.83]
D      comp51698_c0_seq1; <a href="/dbget-bin/www_bget?ko:K01778">K01778</a>  dapF; diaminopimelate epimerase [EC:5.1.1.7]
D      comp56551_c0_seq5; <a href="/dbget-bin/www_bget?ko:K01586">K01586</a>  lysA; diaminopimelate decarboxylase [EC:4.1.1.20]
D      comp60126_c0_seq2; <a href="/dbget-bin/www_bget?ko:K00264">K00264</a>  GLT1; glutamate synthase (NADPH/NADH) [EC:1.4.1.13 1.4.1.14]
D      comp41170_c0_seq1; <a href="/dbget-bin/www_bget?ko:K00616">K00616</a>  E2.2.1.2, talA, talB; transaldolase [EC:2.2.1.2]
D      comp46908_c0_seq1; <a href="/dbget-bin/www_bget?ko:K00616">K00616</a>  E2.2.1.2, talA, talB; transaldolase [EC:2.2.1.2]
D      comp52465_c0_seq5; <a href="/dbget-bin/www_bget?ko:K00765">K00765</a>  hisG; ATP phosphoribosyltransferase [EC:2.4.2.17]
D      comp51659_c0_seq2; <a href="/dbget-bin/www_bget?ko:K01814">K01814</a>  hisA; phosphoribosylformimino-5-aminoimidazole carboxamide ribotide isomerase [EC:5.3.1.16]
D      comp56964_c0_seq6; <a href="/dbget-bin/www_bget?ko:K01693">K01693</a>  E4.2.1.19, hisB; imidazoleglycerol-phosphate dehydratase [EC:4.2.1.19]
D      comp57622_c0_seq1; <a href="/dbget-bin/www_bget?ko:K00817">K00817</a>  hisC; histidinol-phosphate aminotransferase [EC:2.6.1.9]
D      comp49863_c0_seq1; <a href="/dbget-bin/www_bget?ko:K01663">K01663</a>  HIS7; glutamine amidotransferase / cyclase [EC:2.4.2.- 4.1.3.-]
D      comp42211_c0_seq1; <a href="/dbget-bin/www_bget?ko:K00013">K00013</a>  hisD; histidinol dehydrogenase [EC:1.1.1.23]
D      comp54771_c0_seq1; <a href="/dbget-bin/www_bget?ko:K01626">K01626</a>  E2.5.1.54, aroF, aroG, aroH; 3-deoxy-7-phosphoheptulonate synthase [EC:2.5.1.54]
D      comp54209_c0_seq1; <a href="/dbget-bin/www_bget?ko:K01735">K01735</a>  aroB; 3-dehydroquinate synthase [EC:4.2.3.4]
D      comp58133_c0_seq2; <a href="/dbget-bin/www_bget?ko:K13832">K13832</a>  aroDE, DHQ-SDH; 3-dehydroquinate dehydratase / shikimate dehydrogenase [EC:4.2.1.10 1.1.1.25]
D      comp56668_c0_seq18; <a href="/dbget-bin/www_bget?ko:K00891">K00891</a>  E2.7.1.71, aroK, aroL; shikimate kinase [EC:2.7.1.71]
D      comp55335_c0_seq2; <a href="/dbget-bin/www_bget?ko:K00800">K00800</a>  aroA; 3-phosphoshikimate 1-carboxyvinyltransferase [EC:2.5.1.19]
D      comp57716_c0_seq1; <a href="/dbget-bin/www_bget?ko:K01736">K01736</a>  aroC; chorismate synthase [EC:4.2.3.5]
D      comp53023_c0_seq3; <a href="/dbget-bin/www_bget?ko:K01850">K01850</a>  E5.4.99.5; chorismate mutase [EC:5.4.99.5]
D      comp55862_c0_seq2; <a href="/dbget-bin/www_bget?ko:K01850">K01850</a>  E5.4.99.5; chorismate mutase [EC:5.4.99.5]
D      comp47482_c0_seq4; <a href="/dbget-bin/www_bget?ko:K00815">K00815</a>  TAT; tyrosine aminotransferase [EC:2.6.1.5]
D      comp52735_c0_seq3; <a href="/dbget-bin/www_bget?ko:K00815">K00815</a>  TAT; tyrosine aminotransferase [EC:2.6.1.5]
D      comp55044_c0_seq1; <a href="/dbget-bin/www_bget?ko:K05359">K05359</a>  ADT, PDT; arogenate/prephenate dehydratase [EC:4.2.1.91 4.2.1.51]
D      comp55645_c0_seq2; <a href="/dbget-bin/www_bget?ko:K05359">K05359</a>  ADT, PDT; arogenate/prephenate dehydratase [EC:4.2.1.91 4.2.1.51]
D      comp58304_c0_seq5; <a href="/dbget-bin/www_bget?ko:K05359">K05359</a>  ADT, PDT; arogenate/prephenate dehydratase [EC:4.2.1.91 4.2.1.51]
D      comp51298_c0_seq5; <a href="/dbget-bin/www_bget?ko:K01657">K01657</a>  trpE; anthranilate synthase component I [EC:4.1.3.27]
D      comp33019_c0_seq1; <a href="/dbget-bin/www_bget?ko:K01658">K01658</a>  trpG; anthranilate synthase component II [EC:4.1.3.27]
D      comp53087_c0_seq7; <a href="/dbget-bin/www_bget?ko:K00766">K00766</a>  trpD; anthranilate phosphoribosyltransferase [EC:2.4.2.18]
D      comp52357_c0_seq2; <a href="/dbget-bin/www_bget?ko:K01817">K01817</a>  trpF; phosphoribosylanthranilate isomerase [EC:5.3.1.24]
D      comp54728_c0_seq1; <a href="/dbget-bin/www_bget?ko:K01609">K01609</a>  trpC; indole-3-glycerol phosphate synthase [EC:4.1.1.48]
D      comp56458_c0_seq5; <a href="/dbget-bin/www_bget?ko:K01695">K01695</a>  trpA; tryptophan synthase alpha chain [EC:4.2.1.20]
D      comp43357_c0_seq1; <a href="/dbget-bin/www_bget?ko:K01696">K01696</a>  trpB; tryptophan synthase beta chain [EC:4.2.1.20]
D      comp56917_c0_seq1; <a href="/dbget-bin/www_bget?ko:K01696">K01696</a>  trpB; tryptophan synthase beta chain [EC:4.2.1.20]
D      comp57377_c1_seq1; <a href="/dbget-bin/www_bget?ko:K06001">K06001</a>  K06001, trpB; tryptophan synthase beta chain [EC:4.2.1.20]
D      comp59013_c0_seq9; <a href="/dbget-bin/www_bget?ko:K15849">K15849</a>  PAT, AAT; bifunctional aspartate aminotransferase and glutamate/aspartate-prephenate aminotransferase [EC:2.6.1.1 2.6.1.78 2.6.1.79]
D      comp57727_c0_seq3; <a href="/dbget-bin/www_bget?ko:K15227">K15227</a>  TYRAAT; arogenate dehydrogenase (NADP+), plant [EC:1.3.1.78]
C    01220 Degradation of aromatic compounds [PATH:<a href="http://www.kegg.jp/kegg-bin/show_pathway?@ko01220/K00487/K00001/K00121">ko01220</a>]
D      comp56960_c0_seq4; <a href="/dbget-bin/www_bget?ko:K00487">K00487</a>  CYP73A; trans-cinnamate 4-monooxygenase [EC:1.14.13.11]
D      comp136573_c0_seq1; <a href="/dbget-bin/www_bget?ko:K00487">K00487</a>  CYP73A; trans-cinnamate 4-monooxygenase [EC:1.14.13.11]
D      comp46391_c0_seq6; <a href="/dbget-bin/www_bget?ko:K00001">K00001</a>  E1.1.1.1, adh; alcohol dehydrogenase [EC:1.1.1.1]
D      comp47846_c0_seq1; <a href="/dbget-bin/www_bget?ko:K00001">K00001</a>  E1.1.1.1, adh; alcohol dehydrogenase [EC:1.1.1.1]
D      comp55735_c0_seq2; <a href="/dbget-bin/www_bget?ko:K00001">K00001</a>  E1.1.1.1, adh; alcohol dehydrogenase [EC:1.1.1.1]
D      comp56151_c0_seq6; <a href="/dbget-bin/www_bget?ko:K00001">K00001</a>  E1.1.1.1, adh; alcohol dehydrogenase [EC:1.1.1.1]
D      comp32193_c0_seq3; <a href="/dbget-bin/www_bget?ko:K00121">K00121</a>  frmA, ADH5, adhC; S-(hydroxymethyl)glutathione dehydrogenase / alcohol dehydrogenase [EC:1.1.1.284 1.1.1.1]
D      comp55546_c0_seq1; <a href="/dbget-bin/www_bget?ko:K00121">K00121</a>  frmA, ADH5, adhC; S-(hydroxymethyl)glutathione dehydrogenase / alcohol dehydrogenase [EC:1.1.1.284 1.1.1.1]
B
B  <b>Carbohydrate metabolism</b>
C    00010 Glycolysis / Gluconeogenesis [PATH:<a href="http://www.kegg.jp/kegg-bin/show_pathway?@ko00010/K00844/K01810/K00850/K03841/K01623/K01803/K00134/K00927/K01834/K15633/K15634/K01689/K00873/K00161/K00162/K00627/K00382/K00016/K01568/K00121/K00001/K00128/K14085/K01895/K01785/K01835/K01792/K00131/K01610">ko00010</a>]
D      comp48404_c0_seq4; <a href="/dbget-bin/www_bget?ko:K00844">K00844</a>  HK; hexokinase [EC:2.7.1.1]
D      comp51148_c0_seq2; <a href="/dbget-bin/www_bget?ko:K00844">K00844</a>  HK; hexokinase [EC:2.7.1.1]
D      comp57111_c1_seq1; <a href="/dbget-bin/www_bget?ko:K00844">K00844</a>  HK; hexokinase [EC:2.7.1.1]
D      comp57637_c0_seq3; <a href="/dbget-bin/www_bget?ko:K00844">K00844</a>  HK; hexokinase [EC:2.7.1.1]
D      comp55017_c1_seq12; <a href="/dbget-bin/www_bget?ko:K01810">K01810</a>  GPI, pgi; glucose-6-phosphate isomerase [EC:5.3.1.9]
D      comp55983_c0_seq2; <a href="/dbget-bin/www_bget?ko:K01810">K01810</a>  GPI, pgi; glucose-6-phosphate isomerase [EC:5.3.1.9]
D      comp48562_c1_seq4; <a href="/dbget-bin/www_bget?ko:K00850">K00850</a>  pfkA, PFK; 6-phosphofructokinase 1 [EC:2.7.1.11]
D      comp49838_c0_seq1; <a href="/dbget-bin/www_bget?ko:K00850">K00850</a>  pfkA, PFK; 6-phosphofructokinase 1 [EC:2.7.1.11]
D      comp55737_c1_seq1; <a href="/dbget-bin/www_bget?ko:K00850">K00850</a>  pfkA, PFK; 6-phosphofructokinase 1 [EC:2.7.1.11]
D      comp58144_c0_seq2; <a href="/dbget-bin/www_bget?ko:K00850">K00850</a>  pfkA, PFK; 6-phosphofructokinase 1 [EC:2.7.1.11]
D      comp36090_c0_seq1; <a href="/dbget-bin/www_bget?ko:K03841">K03841</a>  FBP, fbp; fructose-1,6-bisphosphatase I [EC:3.1.3.11]
D      comp48711_c0_seq4; <a href="/dbget-bin/www_bget?ko:K03841">K03841</a>  FBP, fbp; fructose-1,6-bisphosphatase I [EC:3.1.3.11]
D      comp57489_c0_seq9; <a href="/dbget-bin/www_bget?ko:K03841">K03841</a>  FBP, fbp; fructose-1,6-bisphosphatase I [EC:3.1.3.11]
D      comp55587_c0_seq2; <a href="/dbget-bin/www_bget?ko:K01623">K01623</a>  ALDO; fructose-bisphosphate aldolase, class I [EC:4.1.2.13]
D      comp56171_c0_seq5; <a href="/dbget-bin/www_bget?ko:K01623">K01623</a>  ALDO; fructose-bisphosphate aldolase, class I [EC:4.1.2.13]
D      comp56625_c2_seq1; <a href="/dbget-bin/www_bget?ko:K01623">K01623</a>  ALDO; fructose-bisphosphate aldolase, class I [EC:4.1.2.13]
D      comp53917_c1_seq1; <a href="/dbget-bin/www_bget?ko:K01803">K01803</a>  TPI, tpiA; triosephosphate isomerase (TIM) [EC:5.3.1.1]
D      comp58151_c0_seq1; <a href="/dbget-bin/www_bget?ko:K01803">K01803</a>  TPI, tpiA; triosephosphate isomerase (TIM) [EC:5.3.1.1]
D      comp53977_c0_seq1; <a href="/dbget-bin/www_bget?ko:K00134">K00134</a>  GAPDH, gapA; glyceraldehyde 3-phosphate dehydrogenase [EC:1.2.1.12]
D      comp79792_c0_seq1; <a href="/dbget-bin/www_bget?ko:K00134">K00134</a>  GAPDH, gapA; glyceraldehyde 3-phosphate dehydrogenase [EC:1.2.1.12]
D      comp43783_c0_seq1; <a href="/dbget-bin/www_bget?ko:K00927">K00927</a>  PGK, pgk; phosphoglycerate kinase [EC:2.7.2.3]
D      comp57359_c0_seq1; <a href="/dbget-bin/www_bget?ko:K01834">K01834</a>  PGAM, gpmA; 2,3-bisphosphoglycerate-dependent phosphoglycerate mutase [EC:5.4.2.1]
D      comp56438_c0_seq1; <a href="/dbget-bin/www_bget?ko:K15633">K15633</a>  gpmI; 2,3-bisphosphoglycerate-independent phosphoglycerate mutase [EC:5.4.2.1]
D      comp51488_c0_seq1; <a href="/dbget-bin/www_bget?ko:K15634">K15634</a>  gpmB; probable phosphoglycerate mutase [EC:5.4.2.1]
D      comp53729_c0_seq17; <a href="/dbget-bin/www_bget?ko:K15634">K15634</a>  gpmB; probable phosphoglycerate mutase [EC:5.4.2.1]
D      comp48115_c0_seq1; <a href="/dbget-bin/www_bget?ko:K01689">K01689</a>  ENO, eno; enolase [EC:4.2.1.11]
D      comp52568_c0_seq1; <a href="/dbget-bin/www_bget?ko:K01689">K01689</a>  ENO, eno; enolase [EC:4.2.1.11]
D      comp55496_c1_seq2; <a href="/dbget-bin/www_bget?ko:K01689">K01689</a>  ENO, eno; enolase [EC:4.2.1.11]
D      comp60595_c0_seq1; <a href="/dbget-bin/www_bget?ko:K01689">K01689</a>  ENO, eno; enolase [EC:4.2.1.11]
D      comp15324_c1_seq1; <a href="/dbget-bin/www_bget?ko:K00873">K00873</a>  PK, pyk; pyruvate kinase [EC:2.7.1.40]
D      comp52264_c0_seq1; <a href="/dbget-bin/www_bget?ko:K00873">K00873</a>  PK, pyk; pyruvate kinase [EC:2.7.1.40]
D      comp55674_c1_seq3; <a href="/dbget-bin/www_bget?ko:K00873">K00873</a>  PK, pyk; pyruvate kinase [EC:2.7.1.40]
D      comp57064_c1_seq13; <a href="/dbget-bin/www_bget?ko:K00873">K00873</a>  PK, pyk; pyruvate kinase [EC:2.7.1.40]
D      comp59067_c0_seq12; <a href="/dbget-bin/www_bget?ko:K00873">K00873</a>  PK, pyk; pyruvate kinase [EC:2.7.1.40]
D      comp59134_c0_seq14; <a href="/dbget-bin/www_bget?ko:K00873">K00873</a>  PK, pyk; pyruvate kinase [EC:2.7.1.40]
D      comp59529_c0_seq4; <a href="/dbget-bin/www_bget?ko:K00873">K00873</a>  PK, pyk; pyruvate kinase [EC:2.7.1.40]
D      comp55011_c0_seq1; <a href="/dbget-bin/www_bget?ko:K00161">K00161</a>  PDHA, pdhA; pyruvate dehydrogenase E1 component subunit alpha [EC:1.2.4.1]
D      comp57333_c0_seq1; <a href="/dbget-bin/www_bget?ko:K00161">K00161</a>  PDHA, pdhA; pyruvate dehydrogenase E1 component subunit alpha [EC:1.2.4.1]
D      comp49149_c0_seq4; <a href="/dbget-bin/www_bget?ko:K00162">K00162</a>  PDHB, pdhB; pyruvate dehydrogenase E1 component subunit beta [EC:1.2.4.1]
D      comp55676_c0_seq3; <a href="/dbget-bin/www_bget?ko:K00162">K00162</a>  PDHB, pdhB; pyruvate dehydrogenase E1 component subunit beta [EC:1.2.4.1]
D      comp55398_c0_seq3; <a href="/dbget-bin/www_bget?ko:K00627">K00627</a>  DLAT, aceF, pdhC; pyruvate dehydrogenase E2 component (dihydrolipoamide acetyltransferase) [EC:2.3.1.12]
D      comp56658_c0_seq3; <a href="/dbget-bin/www_bget?ko:K00627">K00627</a>  DLAT, aceF, pdhC; pyruvate dehydrogenase E2 component (dihydrolipoamide acetyltransferase) [EC:2.3.1.12]
D      comp58053_c1_seq5; <a href="/dbget-bin/www_bget?ko:K00627">K00627</a>  DLAT, aceF, pdhC; pyruvate dehydrogenase E2 component (dihydrolipoamide acetyltransferase) [EC:2.3.1.12]
D      comp56989_c0_seq1; <a href="/dbget-bin/www_bget?ko:K00382">K00382</a>  DLD, lpd, pdhD; dihydrolipoamide dehydrogenase [EC:1.8.1.4]
D      comp59443_c0_seq6; <a href="/dbget-bin/www_bget?ko:K00382">K00382</a>  DLD, lpd, pdhD; dihydrolipoamide dehydrogenase [EC:1.8.1.4]
D      comp52609_c1_seq2; <a href="/dbget-bin/www_bget?ko:K00016">K00016</a>  LDH, ldh; L-lactate dehydrogenase [EC:1.1.1.27]
D      comp57438_c2_seq2; <a href="/dbget-bin/www_bget?ko:K01568">K01568</a>  E4.1.1.1, pdc; pyruvate decarboxylase [EC:4.1.1.1]
D      comp32193_c0_seq3; <a href="/dbget-bin/www_bget?ko:K00121">K00121</a>  frmA, ADH5, adhC; S-(hydroxymethyl)glutathione dehydrogenase / alcohol dehydrogenase [EC:1.1.1.284 1.1.1.1]
D      comp55546_c0_seq1; <a href="/dbget-bin/www_bget?ko:K00121">K00121</a>  frmA, ADH5, adhC; S-(hydroxymethyl)glutathione dehydrogenase / alcohol dehydrogenase [EC:1.1.1.284 1.1.1.1]
D      comp46391_c0_seq6; <a href="/dbget-bin/www_bget?ko:K00001">K00001</a>  E1.1.1.1, adh; alcohol dehydrogenase [EC:1.1.1.1]
D      comp47846_c0_seq1; <a href="/dbget-bin/www_bget?ko:K00001">K00001</a>  E1.1.1.1, adh; alcohol dehydrogenase [EC:1.1.1.1]
D      comp55735_c0_seq2; <a href="/dbget-bin/www_bget?ko:K00001">K00001</a>  E1.1.1.1, adh; alcohol dehydrogenase [EC:1.1.1.1]
D      comp56151_c0_seq6; <a href="/dbget-bin/www_bget?ko:K00001">K00001</a>  E1.1.1.1, adh; alcohol dehydrogenase [EC:1.1.1.1]
D      comp44038_c0_seq3; <a href="/dbget-bin/www_bget?ko:K00128">K00128</a>  E1.2.1.3; aldehyde dehydrogenase (NAD+) [EC:1.2.1.3]
D      comp44097_c0_seq4; <a href="/dbget-bin/www_bget?ko:K00128">K00128</a>  E1.2.1.3; aldehyde dehydrogenase (NAD+) [EC:1.2.1.3]
D      comp49751_c0_seq2; <a href="/dbget-bin/www_bget?ko:K00128">K00128</a>  E1.2.1.3; aldehyde dehydrogenase (NAD+) [EC:1.2.1.3]
D      comp58228_c0_seq4; <a href="/dbget-bin/www_bget?ko:K00128">K00128</a>  E1.2.1.3; aldehyde dehydrogenase (NAD+) [EC:1.2.1.3]
D      comp58879_c2_seq1; <a href="/dbget-bin/www_bget?ko:K00128">K00128</a>  E1.2.1.3; aldehyde dehydrogenase (NAD+) [EC:1.2.1.3]
D      comp59070_c0_seq1; <a href="/dbget-bin/www_bget?ko:K14085">K14085</a>  ALDH7A1; aldehyde dehydrogenase family 7 member A1 [EC:1.2.1.31 1.2.1.8 1.2.1.3]
D      comp54734_c0_seq1; <a href="/dbget-bin/www_bget?ko:K01895">K01895</a>  ACSS, acs; acetyl-CoA synthetase [EC:6.2.1.1]
D      comp50164_c0_seq2; <a href="/dbget-bin/www_bget?ko:K01785">K01785</a>  E5.1.3.3, galM; aldose 1-epimerase [EC:5.1.3.3]
D      comp53673_c0_seq2; <a href="/dbget-bin/www_bget?ko:K01785">K01785</a>  E5.1.3.3, galM; aldose 1-epimerase [EC:5.1.3.3]
D      comp55791_c0_seq1; <a href="/dbget-bin/www_bget?ko:K01785">K01785</a>  E5.1.3.3, galM; aldose 1-epimerase [EC:5.1.3.3]
D      comp42135_c0_seq1; <a href="/dbget-bin/www_bget?ko:K01835">K01835</a>  pgm; phosphoglucomutase [EC:5.4.2.2]
D      comp51508_c0_seq1; <a href="/dbget-bin/www_bget?ko:K01835">K01835</a>  pgm; phosphoglucomutase [EC:5.4.2.2]
D      comp54612_c0_seq6; <a href="/dbget-bin/www_bget?ko:K01792">K01792</a>  E5.1.3.15; glucose-6-phosphate 1-epimerase [EC:5.1.3.15]
D      comp55264_c0_seq3; <a href="/dbget-bin/www_bget?ko:K01792">K01792</a>  E5.1.3.15; glucose-6-phosphate 1-epimerase [EC:5.1.3.15]
D      comp55313_c0_seq2; <a href="/dbget-bin/www_bget?ko:K01792">K01792</a>  E5.1.3.15; glucose-6-phosphate 1-epimerase [EC:5.1.3.15]
D      comp55346_c0_seq4; <a href="/dbget-bin/www_bget?ko:K01792">K01792</a>  E5.1.3.15; glucose-6-phosphate 1-epimerase [EC:5.1.3.15]
D      comp57054_c0_seq6; <a href="/dbget-bin/www_bget?ko:K01792">K01792</a>  E5.1.3.15; glucose-6-phosphate 1-epimerase [EC:5.1.3.15]
D      comp57262_c0_seq2; <a href="/dbget-bin/www_bget?ko:K00131">K00131</a>  E1.2.1.9, gapN; glyceraldehyde-3-phosphate dehydrogenase (NADP) [EC:1.2.1.9]
D      comp58553_c1_seq3; <a href="/dbget-bin/www_bget?ko:K01610">K01610</a>  E4.1.1.49, pckA; phosphoenolpyruvate carboxykinase (ATP) [EC:4.1.1.49]
C    00020 Citrate cycle (TCA cycle) [PATH:<a href="http://www.kegg.jp/kegg-bin/show_pathway?@ko00020/K01647/K01648/K01681/K00031/K00030/K00164/K00658/K00382/K01899/K01900/K00234/K00235/K01679/K00025/K00026/K01610/K00161/K00162/K00627">ko00020</a>]
D      comp51690_c0_seq1; <a href="/dbget-bin/www_bget?ko:K01647">K01647</a>  CS, gltA; citrate synthase [EC:2.3.3.1]
D      comp50429_c0_seq5; <a href="/dbget-bin/www_bget?ko:K01648">K01648</a>  ACLY; ATP citrate (pro-S)-lyase [EC:2.3.3.8]
D      comp57456_c0_seq1; <a href="/dbget-bin/www_bget?ko:K01648">K01648</a>  ACLY; ATP citrate (pro-S)-lyase [EC:2.3.3.8]
D      comp58102_c0_seq1; <a href="/dbget-bin/www_bget?ko:K01648">K01648</a>  ACLY; ATP citrate (pro-S)-lyase [EC:2.3.3.8]
D      comp59570_c0_seq1; <a href="/dbget-bin/www_bget?ko:K01681">K01681</a>  ACO, acnA; aconitate hydratase [EC:4.2.1.3]
D      comp59759_c0_seq2; <a href="/dbget-bin/www_bget?ko:K01681">K01681</a>  ACO, acnA; aconitate hydratase [EC:4.2.1.3]
D      comp49786_c0_seq1; <a href="/dbget-bin/www_bget?ko:K00031">K00031</a>  IDH1, IDH2, icd; isocitrate dehydrogenase [EC:1.1.1.42]
D      comp52337_c0_seq1; <a href="/dbget-bin/www_bget?ko:K00031">K00031</a>  IDH1, IDH2, icd; isocitrate dehydrogenase [EC:1.1.1.42]
D      comp50329_c1_seq1; <a href="/dbget-bin/www_bget?ko:K00030">K00030</a>  IDH3; isocitrate dehydrogenase (NAD+) [EC:1.1.1.41]
D      comp53279_c0_seq1; <a href="/dbget-bin/www_bget?ko:K00030">K00030</a>  IDH3; isocitrate dehydrogenase (NAD+) [EC:1.1.1.41]
D      comp54468_c0_seq1; <a href="/dbget-bin/www_bget?ko:K00164">K00164</a>  OGDH, sucA; 2-oxoglutarate dehydrogenase E1 component [EC:1.2.4.2]
D      comp57397_c0_seq3; <a href="/dbget-bin/www_bget?ko:K00658">K00658</a>  DLST, sucB; 2-oxoglutarate dehydrogenase E2 component (dihydrolipoamide succinyltransferase) [EC:2.3.1.61]
D      comp57803_c1_seq3; <a href="/dbget-bin/www_bget?ko:K00658">K00658</a>  DLST, sucB; 2-oxoglutarate dehydrogenase E2 component (dihydrolipoamide succinyltransferase) [EC:2.3.1.61]
D      comp56989_c0_seq1; <a href="/dbget-bin/www_bget?ko:K00382">K00382</a>  DLD, lpd, pdhD; dihydrolipoamide dehydrogenase [EC:1.8.1.4]
D      comp59443_c0_seq6; <a href="/dbget-bin/www_bget?ko:K00382">K00382</a>  DLD, lpd, pdhD; dihydrolipoamide dehydrogenase [EC:1.8.1.4]
D      comp58703_c0_seq1; <a href="/dbget-bin/www_bget?ko:K01899">K01899</a>  LSC1; succinyl-CoA synthetase alpha subunit [EC:6.2.1.4 6.2.1.5]
D      comp56585_c0_seq1; <a href="/dbget-bin/www_bget?ko:K01900">K01900</a>  LSC2; succinyl-CoA synthetase beta subunit [EC:6.2.1.4 6.2.1.5]
D      comp56541_c0_seq1; <a href="/dbget-bin/www_bget?ko:K00234">K00234</a>  SDHA, SDH1; succinate dehydrogenase (ubiquinone) flavoprotein subunit [EC:1.3.5.1]
D      comp48752_c0_seq3; <a href="/dbget-bin/www_bget?ko:K00235">K00235</a>  SDHB, SDH2; succinate dehydrogenase (ubiquinone) iron-sulfur subunit [EC:1.3.5.1]
D      comp52714_c0_seq1; <a href="/dbget-bin/www_bget?ko:K01679">K01679</a>  E4.2.1.2B, fumC; fumarate hydratase, class II [EC:4.2.1.2]
D      comp50573_c0_seq1; <a href="/dbget-bin/www_bget?ko:K00025">K00025</a>  MDH1; malate dehydrogenase [EC:1.1.1.37]
D      comp35210_c0_seq1; <a href="/dbget-bin/www_bget?ko:K00026">K00026</a>  MDH2; malate dehydrogenase [EC:1.1.1.37]
D      comp49324_c0_seq1; <a href="/dbget-bin/www_bget?ko:K00026">K00026</a>  MDH2; malate dehydrogenase [EC:1.1.1.37]
D      comp55544_c0_seq2; <a href="/dbget-bin/www_bget?ko:K00026">K00026</a>  MDH2; malate dehydrogenase [EC:1.1.1.37]
D      comp58280_c0_seq2; <a href="/dbget-bin/www_bget?ko:K00026">K00026</a>  MDH2; malate dehydrogenase [EC:1.1.1.37]
D      comp58553_c1_seq3; <a href="/dbget-bin/www_bget?ko:K01610">K01610</a>  E4.1.1.49, pckA; phosphoenolpyruvate carboxykinase (ATP) [EC:4.1.1.49]
D      comp55011_c0_seq1; <a href="/dbget-bin/www_bget?ko:K00161">K00161</a>  PDHA, pdhA; pyruvate dehydrogenase E1 component subunit alpha [EC:1.2.4.1]
D      comp57333_c0_seq1; <a href="/dbget-bin/www_bget?ko:K00161">K00161</a>  PDHA, pdhA; pyruvate dehydrogenase E1 component subunit alpha [EC:1.2.4.1]
D      comp49149_c0_seq4; <a href="/dbget-bin/www_bget?ko:K00162">K00162</a>  PDHB, pdhB; pyruvate dehydrogenase E1 component subunit beta [EC:1.2.4.1]
D      comp55676_c0_seq3; <a href="/dbget-bin/www_bget?ko:K00162">K00162</a>  PDHB, pdhB; pyruvate dehydrogenase E1 component subunit beta [EC:1.2.4.1]
D      comp55398_c0_seq3; <a href="/dbget-bin/www_bget?ko:K00627">K00627</a>  DLAT, aceF, pdhC; pyruvate dehydrogenase E2 component (dihydrolipoamide acetyltransferase) [EC:2.3.1.12]
D      comp56658_c0_seq3; <a href="/dbget-bin/www_bget?ko:K00627">K00627</a>  DLAT, aceF, pdhC; pyruvate dehydrogenase E2 component (dihydrolipoamide acetyltransferase) [EC:2.3.1.12]
D      comp58053_c1_seq5; <a href="/dbget-bin/www_bget?ko:K00627">K00627</a>  DLAT, aceF, pdhC; pyruvate dehydrogenase E2 component (dihydrolipoamide acetyltransferase) [EC:2.3.1.12]
C    00030 Pentose phosphate pathway [PATH:<a href="http://www.kegg.jp/kegg-bin/show_pathway?@ko00030/K01810/K00036/K01057/K00033/K01783/K00615/K00616/K01807/K00852/K01835/K00948/K00851/K01623/K03841/K00850">ko00030</a>]
D      comp55017_c1_seq12; <a href="/dbget-bin/www_bget?ko:K01810">K01810</a>  GPI, pgi; glucose-6-phosphate isomerase [EC:5.3.1.9]
D      comp55983_c0_seq2; <a href="/dbget-bin/www_bget?ko:K01810">K01810</a>  GPI, pgi; glucose-6-phosphate isomerase [EC:5.3.1.9]
D      comp44095_c0_seq1; <a href="/dbget-bin/www_bget?ko:K00036">K00036</a>  G6PD, zwf; glucose-6-phosphate 1-dehydrogenase [EC:1.1.1.49]
D      comp55231_c0_seq2; <a href="/dbget-bin/www_bget?ko:K00036">K00036</a>  G6PD, zwf; glucose-6-phosphate 1-dehydrogenase [EC:1.1.1.49]
D      comp57069_c0_seq3; <a href="/dbget-bin/www_bget?ko:K00036">K00036</a>  G6PD, zwf; glucose-6-phosphate 1-dehydrogenase [EC:1.1.1.49]
D      comp53644_c0_seq1; <a href="/dbget-bin/www_bget?ko:K01057">K01057</a>  PGLS, pgl, devB; 6-phosphogluconolactonase [EC:3.1.1.31]
D      comp54027_c1_seq31; <a href="/dbget-bin/www_bget?ko:K01057">K01057</a>  PGLS, pgl, devB; 6-phosphogluconolactonase [EC:3.1.1.31]
D      comp54557_c0_seq1; <a href="/dbget-bin/www_bget?ko:K00033">K00033</a>  E1.1.1.44, PGD, gnd; 6-phosphogluconate dehydrogenase [EC:1.1.1.44]
D      comp56026_c0_seq1; <a href="/dbget-bin/www_bget?ko:K00033">K00033</a>  E1.1.1.44, PGD, gnd; 6-phosphogluconate dehydrogenase [EC:1.1.1.44]
D      comp52012_c0_seq17; <a href="/dbget-bin/www_bget?ko:K01783">K01783</a>  rpe, RPE; ribulose-phosphate 3-epimerase [EC:5.1.3.1]
D      comp56499_c0_seq1; <a href="/dbget-bin/www_bget?ko:K01783">K01783</a>  rpe, RPE; ribulose-phosphate 3-epimerase [EC:5.1.3.1]
D      comp58063_c1_seq3; <a href="/dbget-bin/www_bget?ko:K00615">K00615</a>  E2.2.1.1, tktA, tktB; transketolase [EC:2.2.1.1]
D      comp41170_c0_seq1; <a href="/dbget-bin/www_bget?ko:K00616">K00616</a>  E2.2.1.2, talA, talB; transaldolase [EC:2.2.1.2]
D      comp46908_c0_seq1; <a href="/dbget-bin/www_bget?ko:K00616">K00616</a>  E2.2.1.2, talA, talB; transaldolase [EC:2.2.1.2]
D      comp47244_c0_seq1; <a href="/dbget-bin/www_bget?ko:K01807">K01807</a>  rpiA; ribose 5-phosphate isomerase A [EC:5.3.1.6]
D      comp47962_c0_seq1; <a href="/dbget-bin/www_bget?ko:K01807">K01807</a>  rpiA; ribose 5-phosphate isomerase A [EC:5.3.1.6]
D      comp56592_c0_seq8; <a href="/dbget-bin/www_bget?ko:K01807">K01807</a>  rpiA; ribose 5-phosphate isomerase A [EC:5.3.1.6]
D      comp49166_c0_seq1; <a href="/dbget-bin/www_bget?ko:K00852">K00852</a>  rbsK, RBKS; ribokinase [EC:2.7.1.15]
D      comp42135_c0_seq1; <a href="/dbget-bin/www_bget?ko:K01835">K01835</a>  pgm; phosphoglucomutase [EC:5.4.2.2]
D      comp51508_c0_seq1; <a href="/dbget-bin/www_bget?ko:K01835">K01835</a>  pgm; phosphoglucomutase [EC:5.4.2.2]
D      comp48339_c0_seq2; <a href="/dbget-bin/www_bget?ko:K00948">K00948</a>  PRPS, prsA; ribose-phosphate pyrophosphokinase [EC:2.7.6.1]
D      comp49178_c0_seq1; <a href="/dbget-bin/www_bget?ko:K00851">K00851</a>  E2.7.1.12, gntK, idnK; gluconokinase [EC:2.7.1.12]
D      comp55587_c0_seq2; <a href="/dbget-bin/www_bget?ko:K01623">K01623</a>  ALDO; fructose-bisphosphate aldolase, class I [EC:4.1.2.13]
D      comp56171_c0_seq5; <a href="/dbget-bin/www_bget?ko:K01623">K01623</a>  ALDO; fructose-bisphosphate aldolase, class I [EC:4.1.2.13]
D      comp56625_c2_seq1; <a href="/dbget-bin/www_bget?ko:K01623">K01623</a>  ALDO; fructose-bisphosphate aldolase, class I [EC:4.1.2.13]
D      comp36090_c0_seq1; <a href="/dbget-bin/www_bget?ko:K03841">K03841</a>  FBP, fbp; fructose-1,6-bisphosphatase I [EC:3.1.3.11]
D      comp48711_c0_seq4; <a href="/dbget-bin/www_bget?ko:K03841">K03841</a>  FBP, fbp; fructose-1,6-bisphosphatase I [EC:3.1.3.11]
D      comp57489_c0_seq9; <a href="/dbget-bin/www_bget?ko:K03841">K03841</a>  FBP, fbp; fructose-1,6-bisphosphatase I [EC:3.1.3.11]
D      comp48562_c1_seq4; <a href="/dbget-bin/www_bget?ko:K00850">K00850</a>  pfkA, PFK; 6-phosphofructokinase 1 [EC:2.7.1.11]
D      comp49838_c0_seq1; <a href="/dbget-bin/www_bget?ko:K00850">K00850</a>  pfkA, PFK; 6-phosphofructokinase 1 [EC:2.7.1.11]
D      comp55737_c1_seq1; <a href="/dbget-bin/www_bget?ko:K00850">K00850</a>  pfkA, PFK; 6-phosphofructokinase 1 [EC:2.7.1.11]
D      comp58144_c0_seq2; <a href="/dbget-bin/www_bget?ko:K00850">K00850</a>  pfkA, PFK; 6-phosphofructokinase 1 [EC:2.7.1.11]
C    00040 Pentose and glucuronate interconversions [PATH:<a href="http://www.kegg.jp/kegg-bin/show_pathway?@ko00040/K01051/K01728/K01184/K01213/K16190/K12447/K00012/K00963/K01783/K00854/K01805/K00128">ko00040</a>]
D      comp48267_c0_seq3; <a href="/dbget-bin/www_bget?ko:K01051">K01051</a>  E3.1.1.11; pectinesterase [EC:3.1.1.11]
D      comp50818_c0_seq1; <a href="/dbget-bin/www_bget?ko:K01051">K01051</a>  E3.1.1.11; pectinesterase [EC:3.1.1.11]
D      comp52234_c0_seq4; <a href="/dbget-bin/www_bget?ko:K01051">K01051</a>  E3.1.1.11; pectinesterase [EC:3.1.1.11]
D      comp53225_c0_seq1; <a href="/dbget-bin/www_bget?ko:K01051">K01051</a>  E3.1.1.11; pectinesterase [EC:3.1.1.11]
D      comp53734_c0_seq2; <a href="/dbget-bin/www_bget?ko:K01051">K01051</a>  E3.1.1.11; pectinesterase [EC:3.1.1.11]
D      comp55721_c0_seq4; <a href="/dbget-bin/www_bget?ko:K01051">K01051</a>  E3.1.1.11; pectinesterase [EC:3.1.1.11]
D      comp57361_c0_seq1; <a href="/dbget-bin/www_bget?ko:K01051">K01051</a>  E3.1.1.11; pectinesterase [EC:3.1.1.11]
D      comp57450_c0_seq1; <a href="/dbget-bin/www_bget?ko:K01051">K01051</a>  E3.1.1.11; pectinesterase [EC:3.1.1.11]
D      comp58893_c0_seq1; <a href="/dbget-bin/www_bget?ko:K01051">K01051</a>  E3.1.1.11; pectinesterase [EC:3.1.1.11]
D      comp82318_c0_seq1; <a href="/dbget-bin/www_bget?ko:K01051">K01051</a>  E3.1.1.11; pectinesterase [EC:3.1.1.11]
D      comp46670_c0_seq1; <a href="/dbget-bin/www_bget?ko:K01728">K01728</a>  E4.2.2.2, pel; pectate lyase [EC:4.2.2.2]
D      comp49071_c1_seq1; <a href="/dbget-bin/www_bget?ko:K01728">K01728</a>  E4.2.2.2, pel; pectate lyase [EC:4.2.2.2]
D      comp50922_c0_seq1; <a href="/dbget-bin/www_bget?ko:K01728">K01728</a>  E4.2.2.2, pel; pectate lyase [EC:4.2.2.2]
D      comp52854_c0_seq4; <a href="/dbget-bin/www_bget?ko:K01728">K01728</a>  E4.2.2.2, pel; pectate lyase [EC:4.2.2.2]
D      comp54899_c0_seq2; <a href="/dbget-bin/www_bget?ko:K01728">K01728</a>  E4.2.2.2, pel; pectate lyase [EC:4.2.2.2]
D      comp54899_c2_seq1; <a href="/dbget-bin/www_bget?ko:K01728">K01728</a>  E4.2.2.2, pel; pectate lyase [EC:4.2.2.2]
D      comp37578_c0_seq1; <a href="/dbget-bin/www_bget?ko:K01184">K01184</a>  E3.2.1.15; polygalacturonase [EC:3.2.1.15]
D      comp54687_c3_seq4; <a href="/dbget-bin/www_bget?ko:K01184">K01184</a>  E3.2.1.15; polygalacturonase [EC:3.2.1.15]
D      comp47931_c0_seq1; <a href="/dbget-bin/www_bget?ko:K01213">K01213</a>  E3.2.1.67; galacturan 1,4-alpha-galacturonidase [EC:3.2.1.67]
D      comp49902_c0_seq2; <a href="/dbget-bin/www_bget?ko:K16190">K16190</a>  GLCAK; glucuronokinase [EC:2.7.1.43]
D      comp35133_c0_seq1; <a href="/dbget-bin/www_bget?ko:K12447">K12447</a>  USP; UDP-sugar pyrophosphorylase [EC:2.7.7.64]
D      comp58861_c0_seq3; <a href="/dbget-bin/www_bget?ko:K00012">K00012</a>  UGDH, ugd; UDPglucose 6-dehydrogenase [EC:1.1.1.22]
D      comp58049_c0_seq1; <a href="/dbget-bin/www_bget?ko:K00963">K00963</a>  UGP2, galU, galF; UTP--glucose-1-phosphate uridylyltransferase [EC:2.7.7.9]
D      comp52012_c0_seq17; <a href="/dbget-bin/www_bget?ko:K01783">K01783</a>  rpe, RPE; ribulose-phosphate 3-epimerase [EC:5.1.3.1]
D      comp56499_c0_seq1; <a href="/dbget-bin/www_bget?ko:K01783">K01783</a>  rpe, RPE; ribulose-phosphate 3-epimerase [EC:5.1.3.1]
D      comp55860_c0_seq1; <a href="/dbget-bin/www_bget?ko:K00854">K00854</a>  xylB, XYLB; xylulokinase [EC:2.7.1.17]
D      comp48449_c0_seq1; <a href="/dbget-bin/www_bget?ko:K01805">K01805</a>  xylA; xylose isomerase [EC:5.3.1.5]
D      comp44038_c0_seq3; <a href="/dbget-bin/www_bget?ko:K00128">K00128</a>  E1.2.1.3; aldehyde dehydrogenase (NAD+) [EC:1.2.1.3]
D      comp44097_c0_seq4; <a href="/dbget-bin/www_bget?ko:K00128">K00128</a>  E1.2.1.3; aldehyde dehydrogenase (NAD+) [EC:1.2.1.3]
D      comp49751_c0_seq2; <a href="/dbget-bin/www_bget?ko:K00128">K00128</a>  E1.2.1.3; aldehyde dehydrogenase (NAD+) [EC:1.2.1.3]
D      comp58228_c0_seq4; <a href="/dbget-bin/www_bget?ko:K00128">K00128</a>  E1.2.1.3; aldehyde dehydrogenase (NAD+) [EC:1.2.1.3]
D      comp58879_c2_seq1; <a href="/dbget-bin/www_bget?ko:K00128">K00128</a>  E1.2.1.3; aldehyde dehydrogenase (NAD+) [EC:1.2.1.3]
C    00051 Fructose and mannose metabolism [PATH:<a href="http://www.kegg.jp/kegg-bin/show_pathway?@ko00051/K00847/K01809/K00966/K01711/K02377/K05305/K00844/K00850/K00895/K03841/K01103/K00008/K01805/K01623/K01803">ko00051</a>]
D      comp46194_c0_seq1; <a href="/dbget-bin/www_bget?ko:K00847">K00847</a>  E2.7.1.4, scrK; fructokinase [EC:2.7.1.4]
D      comp53249_c0_seq1; <a href="/dbget-bin/www_bget?ko:K00847">K00847</a>  E2.7.1.4, scrK; fructokinase [EC:2.7.1.4]
D      comp53315_c0_seq1; <a href="/dbget-bin/www_bget?ko:K00847">K00847</a>  E2.7.1.4, scrK; fructokinase [EC:2.7.1.4]
D      comp56344_c0_seq3; <a href="/dbget-bin/www_bget?ko:K00847">K00847</a>  E2.7.1.4, scrK; fructokinase [EC:2.7.1.4]
D      comp54764_c0_seq1; <a href="/dbget-bin/www_bget?ko:K01809">K01809</a>  E5.3.1.8, manA; mannose-6-phosphate isomerase [EC:5.3.1.8]
D      comp28169_c0_seq1; <a href="/dbget-bin/www_bget?ko:K00966">K00966</a>  GMPP; mannose-1-phosphate guanylyltransferase [EC:2.7.7.13]
D      comp55585_c1_seq1; <a href="/dbget-bin/www_bget?ko:K00966">K00966</a>  GMPP; mannose-1-phosphate guanylyltransferase [EC:2.7.7.13]
D      comp49105_c0_seq1; <a href="/dbget-bin/www_bget?ko:K01711">K01711</a>  gmd, GMDS; GDPmannose 4,6-dehydratase [EC:4.2.1.47]
D      comp54798_c0_seq1; <a href="/dbget-bin/www_bget?ko:K02377">K02377</a>  E1.1.1.271, fcl; GDP-L-fucose synthase [EC:1.1.1.271]
D      comp55851_c1_seq3; <a href="/dbget-bin/www_bget?ko:K05305">K05305</a>  FUK; fucokinase [EC:2.7.1.52]
D      comp48404_c0_seq4; <a href="/dbget-bin/www_bget?ko:K00844">K00844</a>  HK; hexokinase [EC:2.7.1.1]
D      comp51148_c0_seq2; <a href="/dbget-bin/www_bget?ko:K00844">K00844</a>  HK; hexokinase [EC:2.7.1.1]
D      comp57111_c1_seq1; <a href="/dbget-bin/www_bget?ko:K00844">K00844</a>  HK; hexokinase [EC:2.7.1.1]
D      comp57637_c0_seq3; <a href="/dbget-bin/www_bget?ko:K00844">K00844</a>  HK; hexokinase [EC:2.7.1.1]
D      comp48562_c1_seq4; <a href="/dbget-bin/www_bget?ko:K00850">K00850</a>  pfkA, PFK; 6-phosphofructokinase 1 [EC:2.7.1.11]
D      comp49838_c0_seq1; <a href="/dbget-bin/www_bget?ko:K00850">K00850</a>  pfkA, PFK; 6-phosphofructokinase 1 [EC:2.7.1.11]
D      comp55737_c1_seq1; <a href="/dbget-bin/www_bget?ko:K00850">K00850</a>  pfkA, PFK; 6-phosphofructokinase 1 [EC:2.7.1.11]
D      comp58144_c0_seq2; <a href="/dbget-bin/www_bget?ko:K00850">K00850</a>  pfkA, PFK; 6-phosphofructokinase 1 [EC:2.7.1.11]
D      comp56747_c0_seq1; <a href="/dbget-bin/www_bget?ko:K00895">K00895</a>  E2.7.1.90, pfk; pyrophosphate--fructose-6-phosphate 1-phosphotransferase [EC:2.7.1.90]
D      comp58875_c0_seq2; <a href="/dbget-bin/www_bget?ko:K00895">K00895</a>  E2.7.1.90, pfk; pyrophosphate--fructose-6-phosphate 1-phosphotransferase [EC:2.7.1.90]
D      comp36090_c0_seq1; <a href="/dbget-bin/www_bget?ko:K03841">K03841</a>  FBP, fbp; fructose-1,6-bisphosphatase I [EC:3.1.3.11]
D      comp48711_c0_seq4; <a href="/dbget-bin/www_bget?ko:K03841">K03841</a>  FBP, fbp; fructose-1,6-bisphosphatase I [EC:3.1.3.11]
D      comp57489_c0_seq9; <a href="/dbget-bin/www_bget?ko:K03841">K03841</a>  FBP, fbp; fructose-1,6-bisphosphatase I [EC:3.1.3.11]
D      comp58551_c0_seq10; <a href="/dbget-bin/www_bget?ko:K01103">K01103</a>  PFKFB; 6-phosphofructo-2-kinase / fructose-2,6-bisphosphatase [EC:2.7.1.105 3.1.3.46]
D      comp52728_c0_seq3; <a href="/dbget-bin/www_bget?ko:K00008">K00008</a>  E1.1.1.14, gutB; L-iditol 2-dehydrogenase [EC:1.1.1.14]
D      comp48449_c0_seq1; <a href="/dbget-bin/www_bget?ko:K01805">K01805</a>  xylA; xylose isomerase [EC:5.3.1.5]
D      comp55587_c0_seq2; <a href="/dbget-bin/www_bget?ko:K01623">K01623</a>  ALDO; fructose-bisphosphate aldolase, class I [EC:4.1.2.13]
D      comp56171_c0_seq5; <a href="/dbget-bin/www_bget?ko:K01623">K01623</a>  ALDO; fructose-bisphosphate aldolase, class I [EC:4.1.2.13]
D      comp56625_c2_seq1; <a href="/dbget-bin/www_bget?ko:K01623">K01623</a>  ALDO; fructose-bisphosphate aldolase, class I [EC:4.1.2.13]
D      comp53917_c1_seq1; <a href="/dbget-bin/www_bget?ko:K01803">K01803</a>  TPI, tpiA; triosephosphate isomerase (TIM) [EC:5.3.1.1]
D      comp58151_c0_seq1; <a href="/dbget-bin/www_bget?ko:K01803">K01803</a>  TPI, tpiA; triosephosphate isomerase (TIM) [EC:5.3.1.1]
C    00052 Galactose metabolism [PATH:<a href="http://www.kegg.jp/kegg-bin/show_pathway?@ko00052/K00849/K01784/K00963/K01835/K00844/K01190/K12309/K00965/K06617/K07407/K00850/K01193/K06611/K01187">ko00052</a>]
D      comp58968_c0_seq1; <a href="/dbget-bin/www_bget?ko:K00849">K00849</a>  galK; galactokinase [EC:2.7.1.6]
D      comp50162_c0_seq1; <a href="/dbget-bin/www_bget?ko:K01784">K01784</a>  galE, GALE; UDP-glucose 4-epimerase [EC:5.1.3.2]
D      comp57798_c0_seq1; <a href="/dbget-bin/www_bget?ko:K01784">K01784</a>  galE, GALE; UDP-glucose 4-epimerase [EC:5.1.3.2]
D      comp58049_c0_seq1; <a href="/dbget-bin/www_bget?ko:K00963">K00963</a>  UGP2, galU, galF; UTP--glucose-1-phosphate uridylyltransferase [EC:2.7.7.9]
D      comp42135_c0_seq1; <a href="/dbget-bin/www_bget?ko:K01835">K01835</a>  pgm; phosphoglucomutase [EC:5.4.2.2]
D      comp51508_c0_seq1; <a href="/dbget-bin/www_bget?ko:K01835">K01835</a>  pgm; phosphoglucomutase [EC:5.4.2.2]
D      comp48404_c0_seq4; <a href="/dbget-bin/www_bget?ko:K00844">K00844</a>  HK; hexokinase [EC:2.7.1.1]
D      comp51148_c0_seq2; <a href="/dbget-bin/www_bget?ko:K00844">K00844</a>  HK; hexokinase [EC:2.7.1.1]
D      comp57111_c1_seq1; <a href="/dbget-bin/www_bget?ko:K00844">K00844</a>  HK; hexokinase [EC:2.7.1.1]
D      comp57637_c0_seq3; <a href="/dbget-bin/www_bget?ko:K00844">K00844</a>  HK; hexokinase [EC:2.7.1.1]
D      comp58177_c0_seq1; <a href="/dbget-bin/www_bget?ko:K01190">K01190</a>  lacZ; beta-galactosidase [EC:3.2.1.23]
D      comp47567_c0_seq1; <a href="/dbget-bin/www_bget?ko:K12309">K12309</a>  GLB1, ELNR1; beta-galactosidase [EC:3.2.1.23]
D      comp47860_c0_seq1; <a href="/dbget-bin/www_bget?ko:K00965">K00965</a>  galT, GALT; UDPglucose--hexose-1-phosphate uridylyltransferase [EC:2.7.7.12]
D      comp53266_c0_seq1; <a href="/dbget-bin/www_bget?ko:K06617">K06617</a>  E2.4.1.82; raffinose synthase [EC:2.4.1.82]
D      comp54068_c0_seq1; <a href="/dbget-bin/www_bget?ko:K06617">K06617</a>  E2.4.1.82; raffinose synthase [EC:2.4.1.82]
D      comp58080_c0_seq2; <a href="/dbget-bin/www_bget?ko:K06617">K06617</a>  E2.4.1.82; raffinose synthase [EC:2.4.1.82]
D      comp60015_c0_seq20; <a href="/dbget-bin/www_bget?ko:K06617">K06617</a>  E2.4.1.82; raffinose synthase [EC:2.4.1.82]
D      comp43091_c0_seq2; <a href="/dbget-bin/www_bget?ko:K07407">K07407</a>  E3.2.1.22B, galA, rafA; alpha-galactosidase [EC:3.2.1.22]
D      comp54803_c0_seq1; <a href="/dbget-bin/www_bget?ko:K07407">K07407</a>  E3.2.1.22B, galA, rafA; alpha-galactosidase [EC:3.2.1.22]
D      comp56212_c2_seq1; <a href="/dbget-bin/www_bget?ko:K07407">K07407</a>  E3.2.1.22B, galA, rafA; alpha-galactosidase [EC:3.2.1.22]
D      comp48562_c1_seq4; <a href="/dbget-bin/www_bget?ko:K00850">K00850</a>  pfkA, PFK; 6-phosphofructokinase 1 [EC:2.7.1.11]
D      comp49838_c0_seq1; <a href="/dbget-bin/www_bget?ko:K00850">K00850</a>  pfkA, PFK; 6-phosphofructokinase 1 [EC:2.7.1.11]
D      comp55737_c1_seq1; <a href="/dbget-bin/www_bget?ko:K00850">K00850</a>  pfkA, PFK; 6-phosphofructokinase 1 [EC:2.7.1.11]
D      comp58144_c0_seq2; <a href="/dbget-bin/www_bget?ko:K00850">K00850</a>  pfkA, PFK; 6-phosphofructokinase 1 [EC:2.7.1.11]
D      comp43926_c0_seq1; <a href="/dbget-bin/www_bget?ko:K01193">K01193</a>  E3.2.1.26, sacA; beta-fructofuranosidase [EC:3.2.1.26]
D      comp55079_c0_seq2; <a href="/dbget-bin/www_bget?ko:K01193">K01193</a>  E3.2.1.26, sacA; beta-fructofuranosidase [EC:3.2.1.26]
D      comp55255_c0_seq1; <a href="/dbget-bin/www_bget?ko:K01193">K01193</a>  E3.2.1.26, sacA; beta-fructofuranosidase [EC:3.2.1.26]
D      comp49517_c0_seq1; <a href="/dbget-bin/www_bget?ko:K06611">K06611</a>  E2.4.1.67; stachyose synthetase [EC:2.4.1.67]
D      comp56320_c0_seq2; <a href="/dbget-bin/www_bget?ko:K01187">K01187</a>  E3.2.1.20, malZ; alpha-glucosidase [EC:3.2.1.20]
C    00053 Ascorbate and aldarate metabolism [PATH:<a href="http://www.kegg.jp/kegg-bin/show_pathway?@ko00053/K00012/K12447/K16190/K00469/K10046/K14190/K10047/K00064/K00225/K08232/K00423/K00434/K00128/K14085">ko00053</a>]
D      comp58861_c0_seq3; <a href="/dbget-bin/www_bget?ko:K00012">K00012</a>  UGDH, ugd; UDPglucose 6-dehydrogenase [EC:1.1.1.22]
D      comp35133_c0_seq1; <a href="/dbget-bin/www_bget?ko:K12447">K12447</a>  USP; UDP-sugar pyrophosphorylase [EC:2.7.7.64]
D      comp49902_c0_seq2; <a href="/dbget-bin/www_bget?ko:K16190">K16190</a>  GLCAK; glucuronokinase [EC:2.7.1.43]
D      comp52565_c0_seq2; <a href="/dbget-bin/www_bget?ko:K00469">K00469</a>  MIOX; inositol oxygenase [EC:1.13.99.1]
D      comp54761_c1_seq4; <a href="/dbget-bin/www_bget?ko:K00469">K00469</a>  MIOX; inositol oxygenase [EC:1.13.99.1]
D      comp56982_c0_seq2; <a href="/dbget-bin/www_bget?ko:K10046">K10046</a>  GME; GDP-D-mannose 3', 5'-epimerase [EC:5.1.3.18 5.1.3.-]
D      comp35678_c0_seq1; <a href="/dbget-bin/www_bget?ko:K14190">K14190</a>  VTC2_5; GDP-L-galactose phosphorylase [EC:2.7.7.69]
D      comp50696_c0_seq4; <a href="/dbget-bin/www_bget?ko:K10047">K10047</a>  VTC4; inositol-phosphate phosphatase / L-galactose 1-phosphate phosphatase [EC:3.1.3.25 3.1.3.-]
D      comp27270_c0_seq1; <a href="/dbget-bin/www_bget?ko:K00064">K00064</a>  E1.1.1.122; D-threo-aldose 1-dehydrogenase [EC:1.1.1.122]
D      comp31876_c0_seq1; <a href="/dbget-bin/www_bget?ko:K00225">K00225</a>  E1.3.2.3; L-galactono-1,4-lactone dehydrogenase [EC:1.3.2.3]
D      comp51054_c0_seq1; <a href="/dbget-bin/www_bget?ko:K08232">K08232</a>  E1.6.5.4; monodehydroascorbate reductase (NADH) [EC:1.6.5.4]
D      comp56819_c0_seq1; <a href="/dbget-bin/www_bget?ko:K08232">K08232</a>  E1.6.5.4; monodehydroascorbate reductase (NADH) [EC:1.6.5.4]
D      comp57955_c0_seq2; <a href="/dbget-bin/www_bget?ko:K08232">K08232</a>  E1.6.5.4; monodehydroascorbate reductase (NADH) [EC:1.6.5.4]
D      comp58692_c0_seq2; <a href="/dbget-bin/www_bget?ko:K00423">K00423</a>  E1.10.3.3; L-ascorbate oxidase [EC:1.10.3.3]
D      comp59471_c1_seq1; <a href="/dbget-bin/www_bget?ko:K00423">K00423</a>  E1.10.3.3; L-ascorbate oxidase [EC:1.10.3.3]
D      comp47786_c0_seq1; <a href="/dbget-bin/www_bget?ko:K00434">K00434</a>  E1.11.1.11; L-ascorbate peroxidase [EC:1.11.1.11]
D      comp50626_c0_seq2; <a href="/dbget-bin/www_bget?ko:K00434">K00434</a>  E1.11.1.11; L-ascorbate peroxidase [EC:1.11.1.11]
D      comp51582_c0_seq1; <a href="/dbget-bin/www_bget?ko:K00434">K00434</a>  E1.11.1.11; L-ascorbate peroxidase [EC:1.11.1.11]
D      comp52700_c1_seq3; <a href="/dbget-bin/www_bget?ko:K00434">K00434</a>  E1.11.1.11; L-ascorbate peroxidase [EC:1.11.1.11]
D      comp59438_c1_seq4; <a href="/dbget-bin/www_bget?ko:K00434">K00434</a>  E1.11.1.11; L-ascorbate peroxidase [EC:1.11.1.11]
D      comp44038_c0_seq3; <a href="/dbget-bin/www_bget?ko:K00128">K00128</a>  E1.2.1.3; aldehyde dehydrogenase (NAD+) [EC:1.2.1.3]
D      comp44097_c0_seq4; <a href="/dbget-bin/www_bget?ko:K00128">K00128</a>  E1.2.1.3; aldehyde dehydrogenase (NAD+) [EC:1.2.1.3]
D      comp49751_c0_seq2; <a href="/dbget-bin/www_bget?ko:K00128">K00128</a>  E1.2.1.3; aldehyde dehydrogenase (NAD+) [EC:1.2.1.3]
D      comp58228_c0_seq4; <a href="/dbget-bin/www_bget?ko:K00128">K00128</a>  E1.2.1.3; aldehyde dehydrogenase (NAD+) [EC:1.2.1.3]
D      comp58879_c2_seq1; <a href="/dbget-bin/www_bget?ko:K00128">K00128</a>  E1.2.1.3; aldehyde dehydrogenase (NAD+) [EC:1.2.1.3]
D      comp59070_c0_seq1; <a href="/dbget-bin/www_bget?ko:K14085">K14085</a>  ALDH7A1; aldehyde dehydrogenase family 7 member A1 [EC:1.2.1.31 1.2.1.8 1.2.1.3]
C    00500 Starch and sucrose metabolism [PATH:<a href="http://www.kegg.jp/kegg-bin/show_pathway?@ko00500/K01193/K00696/K00695/K01187/K01188/K05349/K05350/K01087/K16055/K01194/K02438/K00012/K15920/K08679/K13648/K01051/K01184/K01213/K00963/K01835/K00844/K01810/K00847/K00975/K00703/K00700/K00688/K01176/K01177/K00705/K01179">ko00500</a>]
D      comp43926_c0_seq1; <a href="/dbget-bin/www_bget?ko:K01193">K01193</a>  E3.2.1.26, sacA; beta-fructofuranosidase [EC:3.2.1.26]
D      comp55079_c0_seq2; <a href="/dbget-bin/www_bget?ko:K01193">K01193</a>  E3.2.1.26, sacA; beta-fructofuranosidase [EC:3.2.1.26]
D      comp55255_c0_seq1; <a href="/dbget-bin/www_bget?ko:K01193">K01193</a>  E3.2.1.26, sacA; beta-fructofuranosidase [EC:3.2.1.26]
D      comp50410_c0_seq1; <a href="/dbget-bin/www_bget?ko:K00696">K00696</a>  E2.4.1.14; sucrose-phosphate synthase [EC:2.4.1.14]
D      comp59703_c0_seq2; <a href="/dbget-bin/www_bget?ko:K00696">K00696</a>  E2.4.1.14; sucrose-phosphate synthase [EC:2.4.1.14]
D      comp59944_c0_seq2; <a href="/dbget-bin/www_bget?ko:K00696">K00696</a>  E2.4.1.14; sucrose-phosphate synthase [EC:2.4.1.14]
D      comp52305_c0_seq1; <a href="/dbget-bin/www_bget?ko:K00695">K00695</a>  E2.4.1.13; sucrose synthase [EC:2.4.1.13]
D      comp58231_c0_seq2; <a href="/dbget-bin/www_bget?ko:K00695">K00695</a>  E2.4.1.13; sucrose synthase [EC:2.4.1.13]
D      comp56320_c0_seq2; <a href="/dbget-bin/www_bget?ko:K01187">K01187</a>  E3.2.1.20, malZ; alpha-glucosidase [EC:3.2.1.20]
D      comp27577_c0_seq1; <a href="/dbget-bin/www_bget?ko:K01188">K01188</a>  E3.2.1.21; beta-glucosidase [EC:3.2.1.21]
D      comp47947_c0_seq4; <a href="/dbget-bin/www_bget?ko:K01188">K01188</a>  E3.2.1.21; beta-glucosidase [EC:3.2.1.21]
D      comp49777_c0_seq4; <a href="/dbget-bin/www_bget?ko:K01188">K01188</a>  E3.2.1.21; beta-glucosidase [EC:3.2.1.21]
D      comp51328_c0_seq2; <a href="/dbget-bin/www_bget?ko:K01188">K01188</a>  E3.2.1.21; beta-glucosidase [EC:3.2.1.21]
D      comp51453_c0_seq2; <a href="/dbget-bin/www_bget?ko:K01188">K01188</a>  E3.2.1.21; beta-glucosidase [EC:3.2.1.21]
D      comp54563_c0_seq1; <a href="/dbget-bin/www_bget?ko:K01188">K01188</a>  E3.2.1.21; beta-glucosidase [EC:3.2.1.21]
D      comp55414_c0_seq17; <a href="/dbget-bin/www_bget?ko:K01188">K01188</a>  E3.2.1.21; beta-glucosidase [EC:3.2.1.21]
D      comp57588_c2_seq3; <a href="/dbget-bin/www_bget?ko:K01188">K01188</a>  E3.2.1.21; beta-glucosidase [EC:3.2.1.21]
D      comp58384_c0_seq10; <a href="/dbget-bin/www_bget?ko:K01188">K01188</a>  E3.2.1.21; beta-glucosidase [EC:3.2.1.21]
D      comp51037_c0_seq1; <a href="/dbget-bin/www_bget?ko:K05349">K05349</a>  bglX; beta-glucosidase [EC:3.2.1.21]
D      comp58288_c0_seq8; <a href="/dbget-bin/www_bget?ko:K05349">K05349</a>  bglX; beta-glucosidase [EC:3.2.1.21]
D      comp58969_c0_seq2; <a href="/dbget-bin/www_bget?ko:K05349">K05349</a>  bglX; beta-glucosidase [EC:3.2.1.21]
D      comp59623_c0_seq5; <a href="/dbget-bin/www_bget?ko:K05349">K05349</a>  bglX; beta-glucosidase [EC:3.2.1.21]
D      comp51564_c0_seq4; <a href="/dbget-bin/www_bget?ko:K05350">K05350</a>  bglB; beta-glucosidase [EC:3.2.1.21]
D      comp52535_c0_seq10; <a href="/dbget-bin/www_bget?ko:K05350">K05350</a>  bglB; beta-glucosidase [EC:3.2.1.21]
D      comp55523_c0_seq1; <a href="/dbget-bin/www_bget?ko:K05350">K05350</a>  bglB; beta-glucosidase [EC:3.2.1.21]
D      comp52599_c0_seq5; <a href="/dbget-bin/www_bget?ko:K01087">K01087</a>  otsB; trehalose 6-phosphate phosphatase [EC:3.1.3.12]
D      comp55965_c0_seq6; <a href="/dbget-bin/www_bget?ko:K01087">K01087</a>  otsB; trehalose 6-phosphate phosphatase [EC:3.1.3.12]
D      comp56144_c0_seq1; <a href="/dbget-bin/www_bget?ko:K01087">K01087</a>  otsB; trehalose 6-phosphate phosphatase [EC:3.1.3.12]
D      comp57678_c1_seq5; <a href="/dbget-bin/www_bget?ko:K01087">K01087</a>  otsB; trehalose 6-phosphate phosphatase [EC:3.1.3.12]
D      comp51297_c0_seq5; <a href="/dbget-bin/www_bget?ko:K16055">K16055</a>  TPS; trehalose 6-phosphate synthase/phosphatase [EC:2.4.1.15 3.1.3.12]
D      comp58966_c0_seq2; <a href="/dbget-bin/www_bget?ko:K16055">K16055</a>  TPS; trehalose 6-phosphate synthase/phosphatase [EC:2.4.1.15 3.1.3.12]
D      comp59408_c0_seq1; <a href="/dbget-bin/www_bget?ko:K16055">K16055</a>  TPS; trehalose 6-phosphate synthase/phosphatase [EC:2.4.1.15 3.1.3.12]
D      comp59540_c0_seq3; <a href="/dbget-bin/www_bget?ko:K16055">K16055</a>  TPS; trehalose 6-phosphate synthase/phosphatase [EC:2.4.1.15 3.1.3.12]
D      comp59647_c0_seq6; <a href="/dbget-bin/www_bget?ko:K16055">K16055</a>  TPS; trehalose 6-phosphate synthase/phosphatase [EC:2.4.1.15 3.1.3.12]
D      comp56761_c0_seq9; <a href="/dbget-bin/www_bget?ko:K01194">K01194</a>  E3.2.1.28, treA, treF; alpha,alpha-trehalase [EC:3.2.1.28]
D      comp56481_c0_seq1; <a href="/dbget-bin/www_bget?ko:K02438">K02438</a>  treX, glgX; glycogen operon protein [EC:3.2.1.-]
D      comp56811_c0_seq12; <a href="/dbget-bin/www_bget?ko:K02438">K02438</a>  treX, glgX; glycogen operon protein [EC:3.2.1.-]
D      comp58861_c0_seq3; <a href="/dbget-bin/www_bget?ko:K00012">K00012</a>  UGDH, ugd; UDPglucose 6-dehydrogenase [EC:1.1.1.22]
D      comp58850_c0_seq6; <a href="/dbget-bin/www_bget?ko:K15920">K15920</a>  XYL4; beta-D-xylosidase 4 [EC:3.2.1.37]
D      comp49250_c0_seq1; <a href="/dbget-bin/www_bget?ko:K08679">K08679</a>  E5.1.3.6; UDP-glucuronate 4-epimerase [EC:5.1.3.6]
D      comp55061_c2_seq3; <a href="/dbget-bin/www_bget?ko:K08679">K08679</a>  E5.1.3.6; UDP-glucuronate 4-epimerase [EC:5.1.3.6]
D      comp56820_c0_seq1; <a href="/dbget-bin/www_bget?ko:K08679">K08679</a>  E5.1.3.6; UDP-glucuronate 4-epimerase [EC:5.1.3.6]
D      comp49698_c0_seq3; <a href="/dbget-bin/www_bget?ko:K13648">K13648</a>  GAUT; alpha-1,4-galacturonosyltransferase [EC:2.4.1.43]
D      comp57036_c0_seq1; <a href="/dbget-bin/www_bget?ko:K13648">K13648</a>  GAUT; alpha-1,4-galacturonosyltransferase [EC:2.4.1.43]
D      comp57748_c0_seq1; <a href="/dbget-bin/www_bget?ko:K13648">K13648</a>  GAUT; alpha-1,4-galacturonosyltransferase [EC:2.4.1.43]
D      comp58038_c0_seq1; <a href="/dbget-bin/www_bget?ko:K13648">K13648</a>  GAUT; alpha-1,4-galacturonosyltransferase [EC:2.4.1.43]
D      comp58318_c0_seq1; <a href="/dbget-bin/www_bget?ko:K13648">K13648</a>  GAUT; alpha-1,4-galacturonosyltransferase [EC:2.4.1.43]
D      comp58701_c1_seq2; <a href="/dbget-bin/www_bget?ko:K13648">K13648</a>  GAUT; alpha-1,4-galacturonosyltransferase [EC:2.4.1.43]
D      comp58908_c1_seq2; <a href="/dbget-bin/www_bget?ko:K13648">K13648</a>  GAUT; alpha-1,4-galacturonosyltransferase [EC:2.4.1.43]
D      comp59574_c0_seq1; <a href="/dbget-bin/www_bget?ko:K13648">K13648</a>  GAUT; alpha-1,4-galacturonosyltransferase [EC:2.4.1.43]
D      comp59893_c1_seq23; <a href="/dbget-bin/www_bget?ko:K13648">K13648</a>  GAUT; alpha-1,4-galacturonosyltransferase [EC:2.4.1.43]
D      comp60005_c0_seq10; <a href="/dbget-bin/www_bget?ko:K13648">K13648</a>  GAUT; alpha-1,4-galacturonosyltransferase [EC:2.4.1.43]
D      comp48267_c0_seq3; <a href="/dbget-bin/www_bget?ko:K01051">K01051</a>  E3.1.1.11; pectinesterase [EC:3.1.1.11]
D      comp50818_c0_seq1; <a href="/dbget-bin/www_bget?ko:K01051">K01051</a>  E3.1.1.11; pectinesterase [EC:3.1.1.11]
D      comp52234_c0_seq4; <a href="/dbget-bin/www_bget?ko:K01051">K01051</a>  E3.1.1.11; pectinesterase [EC:3.1.1.11]
D      comp53225_c0_seq1; <a href="/dbget-bin/www_bget?ko:K01051">K01051</a>  E3.1.1.11; pectinesterase [EC:3.1.1.11]
D      comp53734_c0_seq2; <a href="/dbget-bin/www_bget?ko:K01051">K01051</a>  E3.1.1.11; pectinesterase [EC:3.1.1.11]
D      comp55721_c0_seq4; <a href="/dbget-bin/www_bget?ko:K01051">K01051</a>  E3.1.1.11; pectinesterase [EC:3.1.1.11]
D      comp57361_c0_seq1; <a href="/dbget-bin/www_bget?ko:K01051">K01051</a>  E3.1.1.11; pectinesterase [EC:3.1.1.11]
D      comp57450_c0_seq1; <a href="/dbget-bin/www_bget?ko:K01051">K01051</a>  E3.1.1.11; pectinesterase [EC:3.1.1.11]
D      comp58893_c0_seq1; <a href="/dbget-bin/www_bget?ko:K01051">K01051</a>  E3.1.1.11; pectinesterase [EC:3.1.1.11]
D      comp82318_c0_seq1; <a href="/dbget-bin/www_bget?ko:K01051">K01051</a>  E3.1.1.11; pectinesterase [EC:3.1.1.11]
D      comp37578_c0_seq1; <a href="/dbget-bin/www_bget?ko:K01184">K01184</a>  E3.2.1.15; polygalacturonase [EC:3.2.1.15]
D      comp54687_c3_seq4; <a href="/dbget-bin/www_bget?ko:K01184">K01184</a>  E3.2.1.15; polygalacturonase [EC:3.2.1.15]
D      comp47931_c0_seq1; <a href="/dbget-bin/www_bget?ko:K01213">K01213</a>  E3.2.1.67; galacturan 1,4-alpha-galacturonidase [EC:3.2.1.67]
D      comp58049_c0_seq1; <a href="/dbget-bin/www_bget?ko:K00963">K00963</a>  UGP2, galU, galF; UTP--glucose-1-phosphate uridylyltransferase [EC:2.7.7.9]
D      comp42135_c0_seq1; <a href="/dbget-bin/www_bget?ko:K01835">K01835</a>  pgm; phosphoglucomutase [EC:5.4.2.2]
D      comp51508_c0_seq1; <a href="/dbget-bin/www_bget?ko:K01835">K01835</a>  pgm; phosphoglucomutase [EC:5.4.2.2]
D      comp48404_c0_seq4; <a href="/dbget-bin/www_bget?ko:K00844">K00844</a>  HK; hexokinase [EC:2.7.1.1]
D      comp51148_c0_seq2; <a href="/dbget-bin/www_bget?ko:K00844">K00844</a>  HK; hexokinase [EC:2.7.1.1]
D      comp57111_c1_seq1; <a href="/dbget-bin/www_bget?ko:K00844">K00844</a>  HK; hexokinase [EC:2.7.1.1]
D      comp57637_c0_seq3; <a href="/dbget-bin/www_bget?ko:K00844">K00844</a>  HK; hexokinase [EC:2.7.1.1]
D      comp55017_c1_seq12; <a href="/dbget-bin/www_bget?ko:K01810">K01810</a>  GPI, pgi; glucose-6-phosphate isomerase [EC:5.3.1.9]
D      comp55983_c0_seq2; <a href="/dbget-bin/www_bget?ko:K01810">K01810</a>  GPI, pgi; glucose-6-phosphate isomerase [EC:5.3.1.9]
D      comp46194_c0_seq1; <a href="/dbget-bin/www_bget?ko:K00847">K00847</a>  E2.7.1.4, scrK; fructokinase [EC:2.7.1.4]
D      comp53249_c0_seq1; <a href="/dbget-bin/www_bget?ko:K00847">K00847</a>  E2.7.1.4, scrK; fructokinase [EC:2.7.1.4]
D      comp53315_c0_seq1; <a href="/dbget-bin/www_bget?ko:K00847">K00847</a>  E2.7.1.4, scrK; fructokinase [EC:2.7.1.4]
D      comp56344_c0_seq3; <a href="/dbget-bin/www_bget?ko:K00847">K00847</a>  E2.7.1.4, scrK; fructokinase [EC:2.7.1.4]
D      comp56696_c0_seq2; <a href="/dbget-bin/www_bget?ko:K00975">K00975</a>  glgC; glucose-1-phosphate adenylyltransferase [EC:2.7.7.27]
D      comp58790_c0_seq3; <a href="/dbget-bin/www_bget?ko:K00975">K00975</a>  glgC; glucose-1-phosphate adenylyltransferase [EC:2.7.7.27]
D      comp58928_c0_seq1; <a href="/dbget-bin/www_bget?ko:K00975">K00975</a>  glgC; glucose-1-phosphate adenylyltransferase [EC:2.7.7.27]
D      comp59079_c0_seq5; <a href="/dbget-bin/www_bget?ko:K00703">K00703</a>  E2.4.1.21, glgA; starch synthase [EC:2.4.1.21]
D      comp59194_c0_seq26; <a href="/dbget-bin/www_bget?ko:K00703">K00703</a>  E2.4.1.21, glgA; starch synthase [EC:2.4.1.21]
D      comp54384_c0_seq1; <a href="/dbget-bin/www_bget?ko:K00700">K00700</a>  glgB; 1,4-alpha-glucan branching enzyme [EC:2.4.1.18]
D      comp56433_c1_seq2; <a href="/dbget-bin/www_bget?ko:K00688">K00688</a>  E2.4.1.1, glgP, PYG; starch phosphorylase [EC:2.4.1.1]
D      comp57524_c4_seq1; <a href="/dbget-bin/www_bget?ko:K00688">K00688</a>  E2.4.1.1, glgP, PYG; starch phosphorylase [EC:2.4.1.1]
D      comp60550_c0_seq1; <a href="/dbget-bin/www_bget?ko:K00688">K00688</a>  E2.4.1.1, glgP, PYG; starch phosphorylase [EC:2.4.1.1]
D      comp44393_c0_seq2; <a href="/dbget-bin/www_bget?ko:K01176">K01176</a>  E3.2.1.1, amyA, malS; alpha-amylase [EC:3.2.1.1]
D      comp34911_c0_seq1; <a href="/dbget-bin/www_bget?ko:K01177">K01177</a>  E3.2.1.2; beta-amylase [EC:3.2.1.2]
D      comp58869_c0_seq2; <a href="/dbget-bin/www_bget?ko:K01177">K01177</a>  E3.2.1.2; beta-amylase [EC:3.2.1.2]
D      comp51104_c0_seq1; <a href="/dbget-bin/www_bget?ko:K00705">K00705</a>  malQ; 4-alpha-glucanotransferase [EC:2.4.1.25]
D      comp57895_c0_seq2; <a href="/dbget-bin/www_bget?ko:K00705">K00705</a>  malQ; 4-alpha-glucanotransferase [EC:2.4.1.25]
D      comp53240_c0_seq2; <a href="/dbget-bin/www_bget?ko:K01179">K01179</a>  E3.2.1.4; endoglucanase [EC:3.2.1.4]
C    00520 Amino sugar and nucleotide sugar metabolism [PATH:<a href="http://www.kegg.jp/kegg-bin/show_pathway?@ko00520/K01183/K12373/K01836/K00972/K00326/K00844/K00621/K00847/K00820/K12446/K12447/K01209/K15920/K12448/K16190/K12449/K01810/K01835/K00963/K00965/K12450/K12451/K00012/K06118/K00849/K01784/K08679/K13648/K00966/K01711/K01809/K10046/K05305/K02377/K00975">ko00520</a>]
D      comp43791_c0_seq1; <a href="/dbget-bin/www_bget?ko:K01183">K01183</a>  E3.2.1.14; chitinase [EC:3.2.1.14]
D      comp43860_c0_seq2; <a href="/dbget-bin/www_bget?ko:K01183">K01183</a>  E3.2.1.14; chitinase [EC:3.2.1.14]
D      comp49329_c0_seq1; <a href="/dbget-bin/www_bget?ko:K01183">K01183</a>  E3.2.1.14; chitinase [EC:3.2.1.14]
D      comp52664_c0_seq2; <a href="/dbget-bin/www_bget?ko:K01183">K01183</a>  E3.2.1.14; chitinase [EC:3.2.1.14]
D      comp54113_c0_seq1; <a href="/dbget-bin/www_bget?ko:K01183">K01183</a>  E3.2.1.14; chitinase [EC:3.2.1.14]
D      comp53235_c0_seq2; <a href="/dbget-bin/www_bget?ko:K12373">K12373</a>  HEXA_B; hexosaminidase [EC:3.2.1.52]
D      comp58573_c1_seq2; <a href="/dbget-bin/www_bget?ko:K12373">K12373</a>  HEXA_B; hexosaminidase [EC:3.2.1.52]
D      comp53411_c0_seq6; <a href="/dbget-bin/www_bget?ko:K01836">K01836</a>  E5.4.2.3; phosphoacetylglucosamine mutase [EC:5.4.2.3]
D      comp47302_c0_seq1; <a href="/dbget-bin/www_bget?ko:K00972">K00972</a>  UAP1; UDP-N-acetylglucosamine pyrophosphorylase [EC:2.7.7.23]
D      comp53600_c0_seq1; <a href="/dbget-bin/www_bget?ko:K00326">K00326</a>  E1.6.2.2; cytochrome-b5 reductase [EC:1.6.2.2]
D      comp55817_c0_seq1; <a href="/dbget-bin/www_bget?ko:K00326">K00326</a>  E1.6.2.2; cytochrome-b5 reductase [EC:1.6.2.2]
D      comp48404_c0_seq4; <a href="/dbget-bin/www_bget?ko:K00844">K00844</a>  HK; hexokinase [EC:2.7.1.1]
D      comp51148_c0_seq2; <a href="/dbget-bin/www_bget?ko:K00844">K00844</a>  HK; hexokinase [EC:2.7.1.1]
D      comp57111_c1_seq1; <a href="/dbget-bin/www_bget?ko:K00844">K00844</a>  HK; hexokinase [EC:2.7.1.1]
D      comp57637_c0_seq3; <a href="/dbget-bin/www_bget?ko:K00844">K00844</a>  HK; hexokinase [EC:2.7.1.1]
D      comp28917_c0_seq2; <a href="/dbget-bin/www_bget?ko:K00621">K00621</a>  E2.3.1.4, GNA1; glucosamine-phosphate N-acetyltransferase [EC:2.3.1.4]
D      comp46194_c0_seq1; <a href="/dbget-bin/www_bget?ko:K00847">K00847</a>  E2.7.1.4, scrK; fructokinase [EC:2.7.1.4]
D      comp53249_c0_seq1; <a href="/dbget-bin/www_bget?ko:K00847">K00847</a>  E2.7.1.4, scrK; fructokinase [EC:2.7.1.4]
D      comp53315_c0_seq1; <a href="/dbget-bin/www_bget?ko:K00847">K00847</a>  E2.7.1.4, scrK; fructokinase [EC:2.7.1.4]
D      comp56344_c0_seq3; <a href="/dbget-bin/www_bget?ko:K00847">K00847</a>  E2.7.1.4, scrK; fructokinase [EC:2.7.1.4]
D      comp48874_c0_seq1; <a href="/dbget-bin/www_bget?ko:K00820">K00820</a>  E2.6.1.16, glmS; glucosamine--fructose-6-phosphate aminotransferase (isomerizing) [EC:2.6.1.16]
D      comp57672_c0_seq1; <a href="/dbget-bin/www_bget?ko:K12446">K12446</a>  E2.7.1.46; L-arabinokinase [EC:2.7.1.46]
D      comp35133_c0_seq1; <a href="/dbget-bin/www_bget?ko:K12447">K12447</a>  USP; UDP-sugar pyrophosphorylase [EC:2.7.7.64]
D      comp54642_c0_seq1; <a href="/dbget-bin/www_bget?ko:K01209">K01209</a>  E3.2.1.55, abfA; alpha-N-arabinofuranosidase [EC:3.2.1.55]
D      comp58850_c0_seq6; <a href="/dbget-bin/www_bget?ko:K15920">K15920</a>  XYL4; beta-D-xylosidase 4 [EC:3.2.1.37]
D      comp57022_c0_seq2; <a href="/dbget-bin/www_bget?ko:K12448">K12448</a>  UXE; UDP-arabinose 4-epimerase [EC:5.1.3.5]
D      comp49902_c0_seq2; <a href="/dbget-bin/www_bget?ko:K16190">K16190</a>  GLCAK; glucuronokinase [EC:2.7.1.43]
D      comp54672_c0_seq1; <a href="/dbget-bin/www_bget?ko:K12449">K12449</a>  AXS; UDP-apiose/xylose synthase
D      comp55017_c1_seq12; <a href="/dbget-bin/www_bget?ko:K01810">K01810</a>  GPI, pgi; glucose-6-phosphate isomerase [EC:5.3.1.9]
D      comp55983_c0_seq2; <a href="/dbget-bin/www_bget?ko:K01810">K01810</a>  GPI, pgi; glucose-6-phosphate isomerase [EC:5.3.1.9]
D      comp42135_c0_seq1; <a href="/dbget-bin/www_bget?ko:K01835">K01835</a>  pgm; phosphoglucomutase [EC:5.4.2.2]
D      comp51508_c0_seq1; <a href="/dbget-bin/www_bget?ko:K01835">K01835</a>  pgm; phosphoglucomutase [EC:5.4.2.2]
D      comp58049_c0_seq1; <a href="/dbget-bin/www_bget?ko:K00963">K00963</a>  UGP2, galU, galF; UTP--glucose-1-phosphate uridylyltransferase [EC:2.7.7.9]
D      comp47860_c0_seq1; <a href="/dbget-bin/www_bget?ko:K00965">K00965</a>  galT, GALT; UDPglucose--hexose-1-phosphate uridylyltransferase [EC:2.7.7.12]
D      comp59133_c0_seq2; <a href="/dbget-bin/www_bget?ko:K12450">K12450</a>  RHM; UDP-glucose 4,6-dehydratase [EC:4.2.1.76]
D      comp47282_c0_seq2; <a href="/dbget-bin/www_bget?ko:K12451">K12451</a>  UER1; 3,5-epimerase/4-reductase [EC:5.1.3.- 1.1.1.-]
D      comp58861_c0_seq3; <a href="/dbget-bin/www_bget?ko:K00012">K00012</a>  UGDH, ugd; UDPglucose 6-dehydrogenase [EC:1.1.1.22]
D      comp53486_c0_seq1; <a href="/dbget-bin/www_bget?ko:K06118">K06118</a>  E3.13.1.1, sqd1, sqdb; UDP-sulfoquinovose synthase [EC:3.13.1.1]
D      comp58968_c0_seq1; <a href="/dbget-bin/www_bget?ko:K00849">K00849</a>  galK; galactokinase [EC:2.7.1.6]
D      comp50162_c0_seq1; <a href="/dbget-bin/www_bget?ko:K01784">K01784</a>  galE, GALE; UDP-glucose 4-epimerase [EC:5.1.3.2]
D      comp57798_c0_seq1; <a href="/dbget-bin/www_bget?ko:K01784">K01784</a>  galE, GALE; UDP-glucose 4-epimerase [EC:5.1.3.2]
D      comp49250_c0_seq1; <a href="/dbget-bin/www_bget?ko:K08679">K08679</a>  E5.1.3.6; UDP-glucuronate 4-epimerase [EC:5.1.3.6]
D      comp55061_c2_seq3; <a href="/dbget-bin/www_bget?ko:K08679">K08679</a>  E5.1.3.6; UDP-glucuronate 4-epimerase [EC:5.1.3.6]
D      comp56820_c0_seq1; <a href="/dbget-bin/www_bget?ko:K08679">K08679</a>  E5.1.3.6; UDP-glucuronate 4-epimerase [EC:5.1.3.6]
D      comp49698_c0_seq3; <a href="/dbget-bin/www_bget?ko:K13648">K13648</a>  GAUT; alpha-1,4-galacturonosyltransferase [EC:2.4.1.43]
D      comp57036_c0_seq1; <a href="/dbget-bin/www_bget?ko:K13648">K13648</a>  GAUT; alpha-1,4-galacturonosyltransferase [EC:2.4.1.43]
D      comp57748_c0_seq1; <a href="/dbget-bin/www_bget?ko:K13648">K13648</a>  GAUT; alpha-1,4-galacturonosyltransferase [EC:2.4.1.43]
D      comp58038_c0_seq1; <a href="/dbget-bin/www_bget?ko:K13648">K13648</a>  GAUT; alpha-1,4-galacturonosyltransferase [EC:2.4.1.43]
D      comp58318_c0_seq1; <a href="/dbget-bin/www_bget?ko:K13648">K13648</a>  GAUT; alpha-1,4-galacturonosyltransferase [EC:2.4.1.43]
D      comp58701_c1_seq2; <a href="/dbget-bin/www_bget?ko:K13648">K13648</a>  GAUT; alpha-1,4-galacturonosyltransferase [EC:2.4.1.43]
D      comp58908_c1_seq2; <a href="/dbget-bin/www_bget?ko:K13648">K13648</a>  GAUT; alpha-1,4-galacturonosyltransferase [EC:2.4.1.43]
D      comp59574_c0_seq1; <a href="/dbget-bin/www_bget?ko:K13648">K13648</a>  GAUT; alpha-1,4-galacturonosyltransferase [EC:2.4.1.43]
D      comp59893_c1_seq23; <a href="/dbget-bin/www_bget?ko:K13648">K13648</a>  GAUT; alpha-1,4-galacturonosyltransferase [EC:2.4.1.43]
D      comp60005_c0_seq10; <a href="/dbget-bin/www_bget?ko:K13648">K13648</a>  GAUT; alpha-1,4-galacturonosyltransferase [EC:2.4.1.43]
D      comp28169_c0_seq1; <a href="/dbget-bin/www_bget?ko:K00966">K00966</a>  GMPP; mannose-1-phosphate guanylyltransferase [EC:2.7.7.13]
D      comp55585_c1_seq1; <a href="/dbget-bin/www_bget?ko:K00966">K00966</a>  GMPP; mannose-1-phosphate guanylyltransferase [EC:2.7.7.13]
D      comp49105_c0_seq1; <a href="/dbget-bin/www_bget?ko:K01711">K01711</a>  gmd, GMDS; GDPmannose 4,6-dehydratase [EC:4.2.1.47]
D      comp54764_c0_seq1; <a href="/dbget-bin/www_bget?ko:K01809">K01809</a>  E5.3.1.8, manA; mannose-6-phosphate isomerase [EC:5.3.1.8]
D      comp56982_c0_seq2; <a href="/dbget-bin/www_bget?ko:K10046">K10046</a>  GME; GDP-D-mannose 3', 5'-epimerase [EC:5.1.3.18 5.1.3.-]
D      comp55851_c1_seq3; <a href="/dbget-bin/www_bget?ko:K05305">K05305</a>  FUK; fucokinase [EC:2.7.1.52]
D      comp54798_c0_seq1; <a href="/dbget-bin/www_bget?ko:K02377">K02377</a>  E1.1.1.271, fcl; GDP-L-fucose synthase [EC:1.1.1.271]
D      comp56696_c0_seq2; <a href="/dbget-bin/www_bget?ko:K00975">K00975</a>  glgC; glucose-1-phosphate adenylyltransferase [EC:2.7.7.27]
D      comp58790_c0_seq3; <a href="/dbget-bin/www_bget?ko:K00975">K00975</a>  glgC; glucose-1-phosphate adenylyltransferase [EC:2.7.7.27]
D      comp58928_c0_seq1; <a href="/dbget-bin/www_bget?ko:K00975">K00975</a>  glgC; glucose-1-phosphate adenylyltransferase [EC:2.7.7.27]
C    00620 Pyruvate metabolism [PATH:<a href="http://www.kegg.jp/kegg-bin/show_pathway?@ko00620/K01895/K00161/K00162/K00627/K00382/K00873/K01962/K02160/K01961/K01963/K11262/K01512/K00128/K14085/K00016/K00102/K01759/K01069/K00028/K00029/K00025/K00026/K00051/K01595/K01610/K01006/K00626/K01649">ko00620</a>]
D      comp54734_c0_seq1; <a href="/dbget-bin/www_bget?ko:K01895">K01895</a>  ACSS, acs; acetyl-CoA synthetase [EC:6.2.1.1]
D      comp55011_c0_seq1; <a href="/dbget-bin/www_bget?ko:K00161">K00161</a>  PDHA, pdhA; pyruvate dehydrogenase E1 component subunit alpha [EC:1.2.4.1]
D      comp57333_c0_seq1; <a href="/dbget-bin/www_bget?ko:K00161">K00161</a>  PDHA, pdhA; pyruvate dehydrogenase E1 component subunit alpha [EC:1.2.4.1]
D      comp49149_c0_seq4; <a href="/dbget-bin/www_bget?ko:K00162">K00162</a>  PDHB, pdhB; pyruvate dehydrogenase E1 component subunit beta [EC:1.2.4.1]
D      comp55676_c0_seq3; <a href="/dbget-bin/www_bget?ko:K00162">K00162</a>  PDHB, pdhB; pyruvate dehydrogenase E1 component subunit beta [EC:1.2.4.1]
D      comp55398_c0_seq3; <a href="/dbget-bin/www_bget?ko:K00627">K00627</a>  DLAT, aceF, pdhC; pyruvate dehydrogenase E2 component (dihydrolipoamide acetyltransferase) [EC:2.3.1.12]
D      comp56658_c0_seq3; <a href="/dbget-bin/www_bget?ko:K00627">K00627</a>  DLAT, aceF, pdhC; pyruvate dehydrogenase E2 component (dihydrolipoamide acetyltransferase) [EC:2.3.1.12]
D      comp58053_c1_seq5; <a href="/dbget-bin/www_bget?ko:K00627">K00627</a>  DLAT, aceF, pdhC; pyruvate dehydrogenase E2 component (dihydrolipoamide acetyltransferase) [EC:2.3.1.12]
D      comp56989_c0_seq1; <a href="/dbget-bin/www_bget?ko:K00382">K00382</a>  DLD, lpd, pdhD; dihydrolipoamide dehydrogenase [EC:1.8.1.4]
D      comp59443_c0_seq6; <a href="/dbget-bin/www_bget?ko:K00382">K00382</a>  DLD, lpd, pdhD; dihydrolipoamide dehydrogenase [EC:1.8.1.4]
D      comp15324_c1_seq1; <a href="/dbget-bin/www_bget?ko:K00873">K00873</a>  PK, pyk; pyruvate kinase [EC:2.7.1.40]
D      comp52264_c0_seq1; <a href="/dbget-bin/www_bget?ko:K00873">K00873</a>  PK, pyk; pyruvate kinase [EC:2.7.1.40]
D      comp55674_c1_seq3; <a href="/dbget-bin/www_bget?ko:K00873">K00873</a>  PK, pyk; pyruvate kinase [EC:2.7.1.40]
D      comp57064_c1_seq13; <a href="/dbget-bin/www_bget?ko:K00873">K00873</a>  PK, pyk; pyruvate kinase [EC:2.7.1.40]
D      comp59067_c0_seq12; <a href="/dbget-bin/www_bget?ko:K00873">K00873</a>  PK, pyk; pyruvate kinase [EC:2.7.1.40]
D      comp59134_c0_seq14; <a href="/dbget-bin/www_bget?ko:K00873">K00873</a>  PK, pyk; pyruvate kinase [EC:2.7.1.40]
D      comp59529_c0_seq4; <a href="/dbget-bin/www_bget?ko:K00873">K00873</a>  PK, pyk; pyruvate kinase [EC:2.7.1.40]
D      comp58271_c1_seq2; <a href="/dbget-bin/www_bget?ko:K01962">K01962</a>  accA; acetyl-CoA carboxylase carboxyl transferase subunit alpha [EC:6.4.1.2]
D      comp53156_c0_seq1; <a href="/dbget-bin/www_bget?ko:K02160">K02160</a>  accB, bccP; acetyl-CoA carboxylase biotin carboxyl carrier protein
D      comp44215_c0_seq1; <a href="/dbget-bin/www_bget?ko:K01961">K01961</a>  accC; acetyl-CoA carboxylase, biotin carboxylase subunit [EC:6.4.1.2 6.3.4.14]
D      comp29918_c0_seq1; <a href="/dbget-bin/www_bget?ko:K01963">K01963</a>  accD; acetyl-CoA carboxylase carboxyl transferase subunit beta [EC:6.4.1.2]
D      comp55805_c0_seq1; <a href="/dbget-bin/www_bget?ko:K11262">K11262</a>  ACAC; acetyl-CoA carboxylase / biotin carboxylase [EC:6.4.1.2 6.3.4.14]
D      comp54883_c0_seq11; <a href="/dbget-bin/www_bget?ko:K01512">K01512</a>  acyP; acylphosphatase [EC:3.6.1.7]
D      comp44038_c0_seq3; <a href="/dbget-bin/www_bget?ko:K00128">K00128</a>  E1.2.1.3; aldehyde dehydrogenase (NAD+) [EC:1.2.1.3]
D      comp44097_c0_seq4; <a href="/dbget-bin/www_bget?ko:K00128">K00128</a>  E1.2.1.3; aldehyde dehydrogenase (NAD+) [EC:1.2.1.3]
D      comp49751_c0_seq2; <a href="/dbget-bin/www_bget?ko:K00128">K00128</a>  E1.2.1.3; aldehyde dehydrogenase (NAD+) [EC:1.2.1.3]
D      comp58228_c0_seq4; <a href="/dbget-bin/www_bget?ko:K00128">K00128</a>  E1.2.1.3; aldehyde dehydrogenase (NAD+) [EC:1.2.1.3]
D      comp58879_c2_seq1; <a href="/dbget-bin/www_bget?ko:K00128">K00128</a>  E1.2.1.3; aldehyde dehydrogenase (NAD+) [EC:1.2.1.3]
D      comp59070_c0_seq1; <a href="/dbget-bin/www_bget?ko:K14085">K14085</a>  ALDH7A1; aldehyde dehydrogenase family 7 member A1 [EC:1.2.1.31 1.2.1.8 1.2.1.3]
D      comp52609_c1_seq2; <a href="/dbget-bin/www_bget?ko:K00016">K00016</a>  LDH, ldh; L-lactate dehydrogenase [EC:1.1.1.27]
D      comp55901_c0_seq24; <a href="/dbget-bin/www_bget?ko:K00102">K00102</a>  E1.1.2.4, dld; D-lactate dehydrogenase (cytochrome) [EC:1.1.2.4]
D      comp44383_c0_seq1; <a href="/dbget-bin/www_bget?ko:K01759">K01759</a>  E4.4.1.5, GLO1, gloA; lactoylglutathione lyase [EC:4.4.1.5]
D      comp47233_c0_seq1; <a href="/dbget-bin/www_bget?ko:K01759">K01759</a>  E4.4.1.5, GLO1, gloA; lactoylglutathione lyase [EC:4.4.1.5]
D      comp54575_c0_seq1; <a href="/dbget-bin/www_bget?ko:K01759">K01759</a>  E4.4.1.5, GLO1, gloA; lactoylglutathione lyase [EC:4.4.1.5]
D      comp43944_c0_seq1; <a href="/dbget-bin/www_bget?ko:K01069">K01069</a>  E3.1.2.6, gloB; hydroxyacylglutathione hydrolase [EC:3.1.2.6]
D      comp51667_c0_seq1; <a href="/dbget-bin/www_bget?ko:K00028">K00028</a>  E1.1.1.39; malate dehydrogenase (decarboxylating) [EC:1.1.1.39]
D      comp58682_c0_seq5; <a href="/dbget-bin/www_bget?ko:K00028">K00028</a>  E1.1.1.39; malate dehydrogenase (decarboxylating) [EC:1.1.1.39]
D      comp46119_c0_seq2; <a href="/dbget-bin/www_bget?ko:K00029">K00029</a>  E1.1.1.40, maeB; malate dehydrogenase (oxaloacetate-decarboxylating)(NADP+) [EC:1.1.1.40]
D      comp58776_c0_seq5; <a href="/dbget-bin/www_bget?ko:K00029">K00029</a>  E1.1.1.40, maeB; malate dehydrogenase (oxaloacetate-decarboxylating)(NADP+) [EC:1.1.1.40]
D      comp50573_c0_seq1; <a href="/dbget-bin/www_bget?ko:K00025">K00025</a>  MDH1; malate dehydrogenase [EC:1.1.1.37]
D      comp35210_c0_seq1; <a href="/dbget-bin/www_bget?ko:K00026">K00026</a>  MDH2; malate dehydrogenase [EC:1.1.1.37]
D      comp49324_c0_seq1; <a href="/dbget-bin/www_bget?ko:K00026">K00026</a>  MDH2; malate dehydrogenase [EC:1.1.1.37]
D      comp55544_c0_seq2; <a href="/dbget-bin/www_bget?ko:K00026">K00026</a>  MDH2; malate dehydrogenase [EC:1.1.1.37]
D      comp58280_c0_seq2; <a href="/dbget-bin/www_bget?ko:K00026">K00026</a>  MDH2; malate dehydrogenase [EC:1.1.1.37]
D      comp59428_c0_seq18; <a href="/dbget-bin/www_bget?ko:K00051">K00051</a>  E1.1.1.82; malate dehydrogenase (NADP+) [EC:1.1.1.82]
D      comp59195_c0_seq1; <a href="/dbget-bin/www_bget?ko:K01595">K01595</a>  ppc; phosphoenolpyruvate carboxylase [EC:4.1.1.31]
D      comp59786_c0_seq2; <a href="/dbget-bin/www_bget?ko:K01595">K01595</a>  ppc; phosphoenolpyruvate carboxylase [EC:4.1.1.31]
D      comp58553_c1_seq3; <a href="/dbget-bin/www_bget?ko:K01610">K01610</a>  E4.1.1.49, pckA; phosphoenolpyruvate carboxykinase (ATP) [EC:4.1.1.49]
D      comp59921_c0_seq3; <a href="/dbget-bin/www_bget?ko:K01006">K01006</a>  ppdK; pyruvate,orthophosphate dikinase [EC:2.7.9.1]
D      comp55836_c0_seq2; <a href="/dbget-bin/www_bget?ko:K00626">K00626</a>  E2.3.1.9, atoB; acetyl-CoA C-acetyltransferase [EC:2.3.1.9]
D      comp58238_c0_seq1; <a href="/dbget-bin/www_bget?ko:K00626">K00626</a>  E2.3.1.9, atoB; acetyl-CoA C-acetyltransferase [EC:2.3.1.9]
D      comp50553_c0_seq3; <a href="/dbget-bin/www_bget?ko:K01649">K01649</a>  leuA; 2-isopropylmalate synthase [EC:2.3.3.13]
C    00630 Glyoxylate and dicarboxylate metabolism [PATH:<a href="http://www.kegg.jp/kegg-bin/show_pathway?@ko00630/K01637/K00025/K00026/K01647/K01681/K00626/K11517/K03781/K01091/K01601/K01602/K00830/K14272/K00284/K01915/K00600/K02437/K15918/K15893/K15919/K00122/K01433/K01455">ko00630</a>]
D      comp211117_c0_seq1; <a href="/dbget-bin/www_bget?ko:K01637">K01637</a>  E4.1.3.1, aceA; isocitrate lyase [EC:4.1.3.1]
D      comp50573_c0_seq1; <a href="/dbget-bin/www_bget?ko:K00025">K00025</a>  MDH1; malate dehydrogenase [EC:1.1.1.37]
D      comp35210_c0_seq1; <a href="/dbget-bin/www_bget?ko:K00026">K00026</a>  MDH2; malate dehydrogenase [EC:1.1.1.37]
D      comp49324_c0_seq1; <a href="/dbget-bin/www_bget?ko:K00026">K00026</a>  MDH2; malate dehydrogenase [EC:1.1.1.37]
D      comp55544_c0_seq2; <a href="/dbget-bin/www_bget?ko:K00026">K00026</a>  MDH2; malate dehydrogenase [EC:1.1.1.37]
D      comp58280_c0_seq2; <a href="/dbget-bin/www_bget?ko:K00026">K00026</a>  MDH2; malate dehydrogenase [EC:1.1.1.37]
D      comp51690_c0_seq1; <a href="/dbget-bin/www_bget?ko:K01647">K01647</a>  CS, gltA; citrate synthase [EC:2.3.3.1]
D      comp59570_c0_seq1; <a href="/dbget-bin/www_bget?ko:K01681">K01681</a>  ACO, acnA; aconitate hydratase [EC:4.2.1.3]
D      comp59759_c0_seq2; <a href="/dbget-bin/www_bget?ko:K01681">K01681</a>  ACO, acnA; aconitate hydratase [EC:4.2.1.3]
D      comp55836_c0_seq2; <a href="/dbget-bin/www_bget?ko:K00626">K00626</a>  E2.3.1.9, atoB; acetyl-CoA C-acetyltransferase [EC:2.3.1.9]
D      comp58238_c0_seq1; <a href="/dbget-bin/www_bget?ko:K00626">K00626</a>  E2.3.1.9, atoB; acetyl-CoA C-acetyltransferase [EC:2.3.1.9]
D      comp27600_c0_seq2; <a href="/dbget-bin/www_bget?ko:K11517">K11517</a>  HAO; (S)-2-hydroxy-acid oxidase [EC:1.1.3.15]
D      comp56671_c0_seq3; <a href="/dbget-bin/www_bget?ko:K11517">K11517</a>  HAO; (S)-2-hydroxy-acid oxidase [EC:1.1.3.15]
D      comp42706_c0_seq1; <a href="/dbget-bin/www_bget?ko:K03781">K03781</a>  katE, CAT, catB, srpA; catalase [EC:1.11.1.6]
D      comp41436_c0_seq1; <a href="/dbget-bin/www_bget?ko:K01091">K01091</a>  E3.1.3.18, gph; phosphoglycolate phosphatase [EC:3.1.3.18]
D      comp93954_c0_seq1; <a href="/dbget-bin/www_bget?ko:K01601">K01601</a>  rbcL; ribulose-bisphosphate carboxylase large chain [EC:4.1.1.39]
D      comp48154_c0_seq1; <a href="/dbget-bin/www_bget?ko:K01602">K01602</a>  rbcS; ribulose-bisphosphate carboxylase small chain [EC:4.1.1.39]
D      comp51513_c0_seq2; <a href="/dbget-bin/www_bget?ko:K01602">K01602</a>  rbcS; ribulose-bisphosphate carboxylase small chain [EC:4.1.1.39]
D      comp57990_c0_seq3; <a href="/dbget-bin/www_bget?ko:K00830">K00830</a>  AGXT; alanine-glyoxylate transaminase / serine-glyoxylate transaminase / serine-pyruvate transaminase [EC:2.6.1.44 2.6.1.45 2.6.1.51]
D      comp57880_c0_seq2; <a href="/dbget-bin/www_bget?ko:K14272">K14272</a>  GGAT; glutamate--glyoxylate aminotransferase [EC:2.6.1.4 2.6.1.2 2.6.1.44 2.6.1.-]
D      comp31162_c0_seq1; <a href="/dbget-bin/www_bget?ko:K00284">K00284</a>  E1.4.7.1; glutamate synthase (ferredoxin) [EC:1.4.7.1]
D      comp43799_c0_seq1; <a href="/dbget-bin/www_bget?ko:K01915">K01915</a>  glnA; glutamine synthetase [EC:6.3.1.2]
D      comp54256_c0_seq1; <a href="/dbget-bin/www_bget?ko:K01915">K01915</a>  glnA; glutamine synthetase [EC:6.3.1.2]
D      comp54510_c0_seq1; <a href="/dbget-bin/www_bget?ko:K00600">K00600</a>  glyA, SHMT; glycine hydroxymethyltransferase [EC:2.1.2.1]
D      comp56200_c0_seq1; <a href="/dbget-bin/www_bget?ko:K00600">K00600</a>  glyA, SHMT; glycine hydroxymethyltransferase [EC:2.1.2.1]
D      comp56514_c0_seq1; <a href="/dbget-bin/www_bget?ko:K00600">K00600</a>  glyA, SHMT; glycine hydroxymethyltransferase [EC:2.1.2.1]
D      comp58011_c1_seq1; <a href="/dbget-bin/www_bget?ko:K00600">K00600</a>  glyA, SHMT; glycine hydroxymethyltransferase [EC:2.1.2.1]
D      comp41001_c0_seq1; <a href="/dbget-bin/www_bget?ko:K02437">K02437</a>  gcvH, GCSH; glycine cleavage system H protein
D      comp55049_c0_seq1; <a href="/dbget-bin/www_bget?ko:K02437">K02437</a>  gcvH, GCSH; glycine cleavage system H protein
D      comp58363_c0_seq4; <a href="/dbget-bin/www_bget?ko:K15918">K15918</a>  GLYK; D-glycerate 3-kinase [EC:2.7.1.31]
D      comp43831_c0_seq1; <a href="/dbget-bin/www_bget?ko:K15893">K15893</a>  HPR1; hydroxypyruvate reductase 1
D      comp48261_c0_seq1; <a href="/dbget-bin/www_bget?ko:K15919">K15919</a>  HPR2; hydroxypyruvate reductase 2
D      comp41702_c0_seq1; <a href="/dbget-bin/www_bget?ko:K00122">K00122</a>  FDH; formate dehydrogenase [EC:1.2.1.2]
D      comp57083_c0_seq7; <a href="/dbget-bin/www_bget?ko:K01433">K01433</a>  purU; formyltetrahydrofolate deformylase [EC:3.5.1.10]
D      comp50636_c0_seq1; <a href="/dbget-bin/www_bget?ko:K01455">K01455</a>  E3.5.1.49; formamidase [EC:3.5.1.49]
C    00640 Propanoate metabolism [PATH:<a href="http://www.kegg.jp/kegg-bin/show_pathway?@ko00640/K00626/K01895/K00249/K00224/K05605/K01962/K02160/K01961/K01963/K11262/K01578/K01899/K01900/K00140/K00128/K14085/K00016">ko00640</a>]
D      comp55836_c0_seq2; <a href="/dbget-bin/www_bget?ko:K00626">K00626</a>  E2.3.1.9, atoB; acetyl-CoA C-acetyltransferase [EC:2.3.1.9]
D      comp58238_c0_seq1; <a href="/dbget-bin/www_bget?ko:K00626">K00626</a>  E2.3.1.9, atoB; acetyl-CoA C-acetyltransferase [EC:2.3.1.9]
D      comp54734_c0_seq1; <a href="/dbget-bin/www_bget?ko:K01895">K01895</a>  ACSS, acs; acetyl-CoA synthetase [EC:6.2.1.1]
D      comp47886_c1_seq1; <a href="/dbget-bin/www_bget?ko:K00249">K00249</a>  ACADM, acd; acyl-CoA dehydrogenase [EC:1.3.8.7]
D      comp46052_c0_seq1; <a href="/dbget-bin/www_bget?ko:K00224">K00224</a>  E1.3.1.-;  [EC:1.3.1.-]
D      comp27635_c0_seq2; <a href="/dbget-bin/www_bget?ko:K05605">K05605</a>  HIBCH; 3-hydroxyisobutyryl-CoA hydrolase [EC:3.1.2.4]
D      comp52137_c0_seq1; <a href="/dbget-bin/www_bget?ko:K05605">K05605</a>  HIBCH; 3-hydroxyisobutyryl-CoA hydrolase [EC:3.1.2.4]
D      comp55025_c0_seq1; <a href="/dbget-bin/www_bget?ko:K05605">K05605</a>  HIBCH; 3-hydroxyisobutyryl-CoA hydrolase [EC:3.1.2.4]
D      comp58271_c1_seq2; <a href="/dbget-bin/www_bget?ko:K01962">K01962</a>  accA; acetyl-CoA carboxylase carboxyl transferase subunit alpha [EC:6.4.1.2]
D      comp53156_c0_seq1; <a href="/dbget-bin/www_bget?ko:K02160">K02160</a>  accB, bccP; acetyl-CoA carboxylase biotin carboxyl carrier protein
D      comp44215_c0_seq1; <a href="/dbget-bin/www_bget?ko:K01961">K01961</a>  accC; acetyl-CoA carboxylase, biotin carboxylase subunit [EC:6.4.1.2 6.3.4.14]
D      comp29918_c0_seq1; <a href="/dbget-bin/www_bget?ko:K01963">K01963</a>  accD; acetyl-CoA carboxylase carboxyl transferase subunit beta [EC:6.4.1.2]
D      comp55805_c0_seq1; <a href="/dbget-bin/www_bget?ko:K11262">K11262</a>  ACAC; acetyl-CoA carboxylase / biotin carboxylase [EC:6.4.1.2 6.3.4.14]
D      comp53570_c0_seq5; <a href="/dbget-bin/www_bget?ko:K01578">K01578</a>  E4.1.1.9, MLYCD; malonyl-CoA decarboxylase [EC:4.1.1.9]
D      comp58703_c0_seq1; <a href="/dbget-bin/www_bget?ko:K01899">K01899</a>  LSC1; succinyl-CoA synthetase alpha subunit [EC:6.2.1.4 6.2.1.5]
D      comp56585_c0_seq1; <a href="/dbget-bin/www_bget?ko:K01900">K01900</a>  LSC2; succinyl-CoA synthetase beta subunit [EC:6.2.1.4 6.2.1.5]
D      comp57326_c0_seq2; <a href="/dbget-bin/www_bget?ko:K00140">K00140</a>  mmsA, iolA, ALDH6A1; malonate-semialdehyde dehydrogenase (acetylating) / methylmalonate-semialdehyde dehydrogenase [EC:1.2.1.18 1.2.1.27]
D      comp44038_c0_seq3; <a href="/dbget-bin/www_bget?ko:K00128">K00128</a>  E1.2.1.3; aldehyde dehydrogenase (NAD+) [EC:1.2.1.3]
D      comp44097_c0_seq4; <a href="/dbget-bin/www_bget?ko:K00128">K00128</a>  E1.2.1.3; aldehyde dehydrogenase (NAD+) [EC:1.2.1.3]
D      comp49751_c0_seq2; <a href="/dbget-bin/www_bget?ko:K00128">K00128</a>  E1.2.1.3; aldehyde dehydrogenase (NAD+) [EC:1.2.1.3]
D      comp58228_c0_seq4; <a href="/dbget-bin/www_bget?ko:K00128">K00128</a>  E1.2.1.3; aldehyde dehydrogenase (NAD+) [EC:1.2.1.3]
D      comp58879_c2_seq1; <a href="/dbget-bin/www_bget?ko:K00128">K00128</a>  E1.2.1.3; aldehyde dehydrogenase (NAD+) [EC:1.2.1.3]
D      comp59070_c0_seq1; <a href="/dbget-bin/www_bget?ko:K14085">K14085</a>  ALDH7A1; aldehyde dehydrogenase family 7 member A1 [EC:1.2.1.31 1.2.1.8 1.2.1.3]
D      comp52609_c1_seq2; <a href="/dbget-bin/www_bget?ko:K00016">K00016</a>  LDH, ldh; L-lactate dehydrogenase [EC:1.1.1.27]
C    00650 Butanoate metabolism [PATH:<a href="http://www.kegg.jp/kegg-bin/show_pathway?@ko00650/K00626/K00074/K00135/K16871/K01580/K01641/K01640/K00161/K00162/K01652/K01653">ko00650</a>]
D      comp55836_c0_seq2; <a href="/dbget-bin/www_bget?ko:K00626">K00626</a>  E2.3.1.9, atoB; acetyl-CoA C-acetyltransferase [EC:2.3.1.9]
D      comp58238_c0_seq1; <a href="/dbget-bin/www_bget?ko:K00626">K00626</a>  E2.3.1.9, atoB; acetyl-CoA C-acetyltransferase [EC:2.3.1.9]
D      comp48614_c0_seq1; <a href="/dbget-bin/www_bget?ko:K00074">K00074</a>  paaH, hbd, fadB, mmgB; 3-hydroxybutyryl-CoA dehydrogenase [EC:1.1.1.157]
D      comp54238_c0_seq2; <a href="/dbget-bin/www_bget?ko:K00135">K00135</a>  E1.2.1.16, gabD; succinate-semialdehyde dehydrogenase (NADP+) [EC:1.2.1.16]
D      comp32411_c0_seq1; <a href="/dbget-bin/www_bget?ko:K16871">K16871</a>  POP2; 4-aminobutyrate---pyruvate transaminase [EC:2.6.1.96]
D      comp56656_c0_seq1; <a href="/dbget-bin/www_bget?ko:K01580">K01580</a>  E4.1.1.15, gadB, gadA, GAD; glutamate decarboxylase [EC:4.1.1.15]
D      comp58537_c0_seq2; <a href="/dbget-bin/www_bget?ko:K01641">K01641</a>  E2.3.3.10; hydroxymethylglutaryl-CoA synthase [EC:2.3.3.10]
D      comp57073_c2_seq3; <a href="/dbget-bin/www_bget?ko:K01640">K01640</a>  E4.1.3.4, HMGCL, hmgL; hydroxymethylglutaryl-CoA lyase [EC:4.1.3.4]
D      comp57174_c2_seq6; <a href="/dbget-bin/www_bget?ko:K01640">K01640</a>  E4.1.3.4, HMGCL, hmgL; hydroxymethylglutaryl-CoA lyase [EC:4.1.3.4]
D      comp55011_c0_seq1; <a href="/dbget-bin/www_bget?ko:K00161">K00161</a>  PDHA, pdhA; pyruvate dehydrogenase E1 component subunit alpha [EC:1.2.4.1]
D      comp57333_c0_seq1; <a href="/dbget-bin/www_bget?ko:K00161">K00161</a>  PDHA, pdhA; pyruvate dehydrogenase E1 component subunit alpha [EC:1.2.4.1]
D      comp49149_c0_seq4; <a href="/dbget-bin/www_bget?ko:K00162">K00162</a>  PDHB, pdhB; pyruvate dehydrogenase E1 component subunit beta [EC:1.2.4.1]
D      comp55676_c0_seq3; <a href="/dbget-bin/www_bget?ko:K00162">K00162</a>  PDHB, pdhB; pyruvate dehydrogenase E1 component subunit beta [EC:1.2.4.1]
D      comp57192_c0_seq2; <a href="/dbget-bin/www_bget?ko:K01652">K01652</a>  E2.2.1.6L, ilvB, ilvG, ilvI; acetolactate synthase I/II/III large subunit [EC:2.2.1.6]
D      comp54908_c3_seq1; <a href="/dbget-bin/www_bget?ko:K01653">K01653</a>  E2.2.1.6S, ilvH, ilvN; acetolactate synthase I/III small subunit [EC:2.2.1.6]
C    00660 C5-Branched dibasic acid metabolism [PATH:<a href="http://www.kegg.jp/kegg-bin/show_pathway?@ko00660/K01652/K01653/K01703/K01704">ko00660</a>]
D      comp57192_c0_seq2; <a href="/dbget-bin/www_bget?ko:K01652">K01652</a>  E2.2.1.6L, ilvB, ilvG, ilvI; acetolactate synthase I/II/III large subunit [EC:2.2.1.6]
D      comp54908_c3_seq1; <a href="/dbget-bin/www_bget?ko:K01653">K01653</a>  E2.2.1.6S, ilvH, ilvN; acetolactate synthase I/III small subunit [EC:2.2.1.6]
D      comp41778_c0_seq1; <a href="/dbget-bin/www_bget?ko:K01703">K01703</a>  leuC; 3-isopropylmalate/(R)-2-methylmalate dehydratase large subunit [EC:4.2.1.33 4.2.1.35]
D      comp53091_c0_seq1; <a href="/dbget-bin/www_bget?ko:K01704">K01704</a>  leuD; 3-isopropylmalate/(R)-2-methylmalate dehydratase small subunit [EC:4.2.1.33 4.2.1.35]
C    00562 Inositol phosphate metabolism [PATH:<a href="http://www.kegg.jp/kegg-bin/show_pathway?@ko00562/K00914/K00888/K00889/K05857/K01110/K00921/K01114/K01092/K10047/K00999/K01858/K15422/K00913/K00915/K10572/K00469/K00140/K01803">ko00562</a>]
D      comp47248_c0_seq1; <a href="/dbget-bin/www_bget?ko:K00914">K00914</a>  PIK3C3, VPS34; phosphatidylinositol 3-kinase [EC:2.7.1.137]
D      comp59027_c2_seq1; <a href="/dbget-bin/www_bget?ko:K00888">K00888</a>  PI4K; phosphatidylinositol 4-kinase [EC:2.7.1.67]
D      comp59862_c0_seq7; <a href="/dbget-bin/www_bget?ko:K00888">K00888</a>  PI4K; phosphatidylinositol 4-kinase [EC:2.7.1.67]
D      comp54912_c0_seq1; <a href="/dbget-bin/www_bget?ko:K00889">K00889</a>  E2.7.1.68, PIP5K; 1-phosphatidylinositol-4-phosphate 5-kinase [EC:2.7.1.68]
D      comp58244_c0_seq2; <a href="/dbget-bin/www_bget?ko:K00889">K00889</a>  E2.7.1.68, PIP5K; 1-phosphatidylinositol-4-phosphate 5-kinase [EC:2.7.1.68]
D      comp59711_c0_seq1; <a href="/dbget-bin/www_bget?ko:K00889">K00889</a>  E2.7.1.68, PIP5K; 1-phosphatidylinositol-4-phosphate 5-kinase [EC:2.7.1.68]
D      comp49177_c0_seq1; <a href="/dbget-bin/www_bget?ko:K05857">K05857</a>  PLCD; phosphatidylinositol phospholipase C, delta [EC:3.1.4.11]
D      comp51083_c0_seq1; <a href="/dbget-bin/www_bget?ko:K05857">K05857</a>  PLCD; phosphatidylinositol phospholipase C, delta [EC:3.1.4.11]
D      comp57235_c0_seq3; <a href="/dbget-bin/www_bget?ko:K05857">K05857</a>  PLCD; phosphatidylinositol phospholipase C, delta [EC:3.1.4.11]
D      comp57596_c0_seq2; <a href="/dbget-bin/www_bget?ko:K05857">K05857</a>  PLCD; phosphatidylinositol phospholipase C, delta [EC:3.1.4.11]
D      comp50991_c0_seq2; <a href="/dbget-bin/www_bget?ko:K01110">K01110</a>  PTEN; phosphatidylinositol-3,4,5-trisphosphate 3-phosphatase and dual-specificity protein phosphatase PTEN [EC:3.1.3.16 3.1.3.48 3.1.3.67]
D      comp58297_c0_seq28; <a href="/dbget-bin/www_bget?ko:K01110">K01110</a>  PTEN; phosphatidylinositol-3,4,5-trisphosphate 3-phosphatase and dual-specificity protein phosphatase PTEN [EC:3.1.3.16 3.1.3.48 3.1.3.67]
D      comp57634_c4_seq1; <a href="/dbget-bin/www_bget?ko:K00921">K00921</a>  PIKFYVE, FAB1; 1-phosphatidylinositol-3-phosphate 5-kinase [EC:2.7.1.150]
D      comp60099_c0_seq6; <a href="/dbget-bin/www_bget?ko:K00921">K00921</a>  PIKFYVE, FAB1; 1-phosphatidylinositol-3-phosphate 5-kinase [EC:2.7.1.150]
D      comp60122_c0_seq3; <a href="/dbget-bin/www_bget?ko:K00921">K00921</a>  PIKFYVE, FAB1; 1-phosphatidylinositol-3-phosphate 5-kinase [EC:2.7.1.150]
D      comp52911_c0_seq1; <a href="/dbget-bin/www_bget?ko:K01114">K01114</a>  plcC; phospholipase C [EC:3.1.4.3]
D      comp53616_c0_seq2; <a href="/dbget-bin/www_bget?ko:K01114">K01114</a>  plcC; phospholipase C [EC:3.1.4.3]
D      comp178814_c0_seq1; <a href="/dbget-bin/www_bget?ko:K01114">K01114</a>  plcC; phospholipase C [EC:3.1.4.3]
D      comp60128_c1_seq1; <a href="/dbget-bin/www_bget?ko:K01092">K01092</a>  E3.1.3.25, IMPA, suhB; myo-inositol-1(or 4)-monophosphatase [EC:3.1.3.25]
D      comp50696_c0_seq4; <a href="/dbget-bin/www_bget?ko:K10047">K10047</a>  VTC4; inositol-phosphate phosphatase / L-galactose 1-phosphate phosphatase [EC:3.1.3.25 3.1.3.-]
D      comp57400_c1_seq4; <a href="/dbget-bin/www_bget?ko:K00999">K00999</a>  CDIPT; CDP-diacylglycerol--inositol 3-phosphatidyltransferase [EC:2.7.8.11]
D      comp56916_c0_seq1; <a href="/dbget-bin/www_bget?ko:K01858">K01858</a>  E5.5.1.4, INO1; myo-inositol-1-phosphate synthase [EC:5.5.1.4]
D      comp49703_c0_seq1; <a href="/dbget-bin/www_bget?ko:K15422">K15422</a>  SAL; 3'(2'), 5'-bisphosphate nucleotidase / inositol polyphosphate 1-phosphatase [EC:3.1.3.7 3.1.3.57]
D      comp44713_c0_seq2; <a href="/dbget-bin/www_bget?ko:K00913">K00913</a>  ITPK1; inositol-1,3,4-trisphosphate 5/6-kinase / inositol-tetrakisphosphate 1-kinase [EC:2.7.1.159 2.7.1.134]
D      comp51253_c0_seq2; <a href="/dbget-bin/www_bget?ko:K00913">K00913</a>  ITPK1; inositol-1,3,4-trisphosphate 5/6-kinase / inositol-tetrakisphosphate 1-kinase [EC:2.7.1.159 2.7.1.134]
D      comp53029_c0_seq3; <a href="/dbget-bin/www_bget?ko:K00913">K00913</a>  ITPK1; inositol-1,3,4-trisphosphate 5/6-kinase / inositol-tetrakisphosphate 1-kinase [EC:2.7.1.159 2.7.1.134]
D      comp57940_c0_seq55; <a href="/dbget-bin/www_bget?ko:K00913">K00913</a>  ITPK1; inositol-1,3,4-trisphosphate 5/6-kinase / inositol-tetrakisphosphate 1-kinase [EC:2.7.1.159 2.7.1.134]
D      comp56261_c0_seq7; <a href="/dbget-bin/www_bget?ko:K00915">K00915</a>  IPK2; 1D-myo-Inositol-tetrakisphosphate 5-kinase / inositol-polyphosphate multikinase [EC:2.7.1.140 2.7.1.151]
D      comp58605_c1_seq6; <a href="/dbget-bin/www_bget?ko:K10572">K10572</a>  IPPK; inositol-pentakisphosphate 2-kinase [EC:2.7.1.158]
D      comp52565_c0_seq2; <a href="/dbget-bin/www_bget?ko:K00469">K00469</a>  MIOX; inositol oxygenase [EC:1.13.99.1]
D      comp54761_c1_seq4; <a href="/dbget-bin/www_bget?ko:K00469">K00469</a>  MIOX; inositol oxygenase [EC:1.13.99.1]
D      comp57326_c0_seq2; <a href="/dbget-bin/www_bget?ko:K00140">K00140</a>  mmsA, iolA, ALDH6A1; malonate-semialdehyde dehydrogenase (acetylating) / methylmalonate-semialdehyde dehydrogenase [EC:1.2.1.18 1.2.1.27]
D      comp53917_c1_seq1; <a href="/dbget-bin/www_bget?ko:K01803">K01803</a>  TPI, tpiA; triosephosphate isomerase (TIM) [EC:5.3.1.1]
D      comp58151_c0_seq1; <a href="/dbget-bin/www_bget?ko:K01803">K01803</a>  TPI, tpiA; triosephosphate isomerase (TIM) [EC:5.3.1.1]
B
B  <b>Energy metabolism</b>
C    00190 Oxidative phosphorylation [PATH:<a href="http://www.kegg.jp/kegg-bin/show_pathway?@ko00190/K05573/K05574/K05575/K05577/K05579/K05580/K05582/K03878/K03879/K03881/K03883/K03884/K03934/K03936/K03937/K03938/K03939/K03940/K03941/K03942/K03943/K03945/K03946/K03949/K03950/K03952/K03953/K03955/K11352/K11353/K03963/K03965/K03966/K03885/K00234/K00235/K00411/K00412/K00413/K00417/K00419/K02257/K02262/K02256/K02265/K02266/K02267/K02258/K02259/K02260/K02112/K02115/K02113/K02109/K02110/K02108/K02135/K02134/K02133/K02136/K02132/K02137/K02128/K02138/K02140/K02146/K02151/K02148/K02145/K02147/K02150/K02155/K03661/K02154/K02149/K02153/K02152/K02144/K01535/K01507">ko00190</a>]
D      comp57189_c0_seq1; <a href="/dbget-bin/www_bget?ko:K05573">K05573</a>  ndhB; NAD(P)H-quinone oxidoreductase subunit 2 [EC:1.6.5.3]
D      comp106604_c0_seq1; <a href="/dbget-bin/www_bget?ko:K05574">K05574</a>  ndhC; NAD(P)H-quinone oxidoreductase subunit 3 [EC:1.6.5.3]
D      comp41902_c0_seq1; <a href="/dbget-bin/www_bget?ko:K05575">K05575</a>  ndhD; NAD(P)H-quinone oxidoreductase subunit 4 [EC:1.6.5.3]
D      comp51695_c0_seq1; <a href="/dbget-bin/www_bget?ko:K05577">K05577</a>  ndhF; NAD(P)H-quinone oxidoreductase subunit 5 [EC:1.6.5.3]
D      comp40576_c0_seq1; <a href="/dbget-bin/www_bget?ko:K05579">K05579</a>  ndhH; NAD(P)H-quinone oxidoreductase subunit H [EC:1.6.5.3]
D      comp36360_c0_seq1; <a href="/dbget-bin/www_bget?ko:K05580">K05580</a>  ndhI; NAD(P)H-quinone oxidoreductase subunit I [EC:1.6.5.3]
D      comp29287_c0_seq1; <a href="/dbget-bin/www_bget?ko:K05582">K05582</a>  ndhK; NAD(P)H-quinone oxidoreductase subunit K [EC:1.6.5.3]
D      comp52755_c1_seq1; <a href="/dbget-bin/www_bget?ko:K03878">K03878</a>  ND1; NADH-ubiquinone oxidoreductase chain 1 [EC:1.6.5.3]
D      comp45935_c1_seq1; <a href="/dbget-bin/www_bget?ko:K03879">K03879</a>  ND2; NADH-ubiquinone oxidoreductase chain 2 [EC:1.6.5.3]
D      comp42829_c0_seq1; <a href="/dbget-bin/www_bget?ko:K03881">K03881</a>  ND4; NADH-ubiquinone oxidoreductase chain 4 [EC:1.6.5.3]
D      comp54851_c2_seq26; <a href="/dbget-bin/www_bget?ko:K03883">K03883</a>  ND5; NADH-ubiquinone oxidoreductase chain 5 [EC:1.6.5.3]
D      comp35175_c0_seq1; <a href="/dbget-bin/www_bget?ko:K03884">K03884</a>  ND6; NADH-ubiquinone oxidoreductase chain 6 [EC:1.6.5.3]
D      comp58489_c0_seq1; <a href="/dbget-bin/www_bget?ko:K03934">K03934</a>  NDUFS1; NADH dehydrogenase (ubiquinone) Fe-S protein 1 [EC:1.6.5.3 1.6.99.3]
D      comp282336_c0_seq1; <a href="/dbget-bin/www_bget?ko:K03936">K03936</a>  NDUFS3; NADH dehydrogenase (ubiquinone) Fe-S protein 3 [EC:1.6.5.3 1.6.99.3]
D      comp52654_c0_seq1; <a href="/dbget-bin/www_bget?ko:K03937">K03937</a>  NDUFS4; NADH dehydrogenase (ubiquinone) Fe-S protein 4 [EC:1.6.5.3 1.6.99.3]
D      comp44131_c0_seq1; <a href="/dbget-bin/www_bget?ko:K03938">K03938</a>  NDUFS5; NADH dehydrogenase (ubiquinone) Fe-S protein 5 [EC:1.6.5.3 1.6.99.3]
D      comp44113_c0_seq1; <a href="/dbget-bin/www_bget?ko:K03939">K03939</a>  NDUFS6; NADH dehydrogenase (ubiquinone) Fe-S protein 6 [EC:1.6.5.3 1.6.99.3]
D      comp49690_c0_seq1; <a href="/dbget-bin/www_bget?ko:K03940">K03940</a>  NDUFS7; NADH dehydrogenase (ubiquinone) Fe-S protein 7 [EC:1.6.5.3 1.6.99.3]
D      comp56891_c1_seq1; <a href="/dbget-bin/www_bget?ko:K03941">K03941</a>  NDUFS8; NADH dehydrogenase (ubiquinone) Fe-S protein 8 [EC:1.6.5.3 1.6.99.3]
D      comp58624_c0_seq1; <a href="/dbget-bin/www_bget?ko:K03942">K03942</a>  NDUFV1; NADH dehydrogenase (ubiquinone) flavoprotein 1 [EC:1.6.5.3 1.6.99.3]
D      comp44330_c0_seq1; <a href="/dbget-bin/www_bget?ko:K03943">K03943</a>  NDUFV2; NADH dehydrogenase (ubiquinone) flavoprotein 2 [EC:1.6.5.3 1.6.99.3]
D      comp58599_c2_seq2; <a href="/dbget-bin/www_bget?ko:K03945">K03945</a>  NDUFA1; NADH dehydrogenase (ubiquinone) 1 alpha subcomplex 1 [EC:1.6.5.3 1.6.99.3]
D      comp54109_c0_seq1; <a href="/dbget-bin/www_bget?ko:K03946">K03946</a>  NDUFA2; NADH dehydrogenase (ubiquinone) 1 alpha subcomplex 2 [EC:1.6.5.3 1.6.99.3]
D      comp44234_c0_seq1; <a href="/dbget-bin/www_bget?ko:K03949">K03949</a>  NDUFA5; NADH dehydrogenase (ubiquinone) 1 alpha subcomplex 5 [EC:1.6.5.3 1.6.99.3]
D      comp42151_c0_seq1; <a href="/dbget-bin/www_bget?ko:K03950">K03950</a>  NDUFA6; NADH dehydrogenase (ubiquinone) 1 alpha subcomplex 6 [EC:1.6.5.3 1.6.99.3]
D      comp50948_c0_seq1; <a href="/dbget-bin/www_bget?ko:K03952">K03952</a>  NDUFA8; NADH dehydrogenase (ubiquinone) 1 alpha subcomplex 8 [EC:1.6.5.3 1.6.99.3]
D      comp40470_c0_seq1; <a href="/dbget-bin/www_bget?ko:K03953">K03953</a>  NDUFA9; NADH dehydrogenase (ubiquinone) 1 alpha subcomplex 9 [EC:1.6.5.3 1.6.99.3]
D      comp27594_c0_seq1; <a href="/dbget-bin/www_bget?ko:K03955">K03955</a>  NDUFAB1; NADH dehydrogenase (ubiquinone) 1 alpha/beta subcomplex 1 [EC:1.6.5.3 1.6.99.3]
D      comp47684_c0_seq1; <a href="/dbget-bin/www_bget?ko:K03955">K03955</a>  NDUFAB1; NADH dehydrogenase (ubiquinone) 1 alpha/beta subcomplex 1 [EC:1.6.5.3 1.6.99.3]
D      comp139085_c0_seq1; <a href="/dbget-bin/www_bget?ko:K11352">K11352</a>  NDUFA12; NADH dehydrogenase (ubiquinone) 1 alpha subcomplex 12 [EC:1.6.5.3 1.6.99.3]
D      comp44246_c0_seq1; <a href="/dbget-bin/www_bget?ko:K11353">K11353</a>  NDUFA13; NADH dehydrogenase (ubiquinone) 1 alpha subcomplex 13 [EC:1.6.5.3 1.6.99.3]
D      comp60937_c0_seq1; <a href="/dbget-bin/www_bget?ko:K03963">K03963</a>  NDUFB7; NADH dehydrogenase (ubiquinone) 1 beta subcomplex 7 [EC:1.6.5.3 1.6.99.3]
D      comp52145_c0_seq2; <a href="/dbget-bin/www_bget?ko:K03965">K03965</a>  NDUFB9; NADH dehydrogenase (ubiquinone) 1 beta subcomplex 9 [EC:1.6.5.3 1.6.99.3]
D      comp41287_c0_seq1; <a href="/dbget-bin/www_bget?ko:K03966">K03966</a>  NDUFB10; NADH dehydrogenase (ubiquinone) 1 beta subcomplex 10 [EC:1.6.5.3 1.6.99.3]
D      comp57624_c0_seq2; <a href="/dbget-bin/www_bget?ko:K03885">K03885</a>  ndh; NADH dehydrogenase [EC:1.6.99.3]
D      comp58708_c0_seq4; <a href="/dbget-bin/www_bget?ko:K03885">K03885</a>  ndh; NADH dehydrogenase [EC:1.6.99.3]
D      comp56541_c0_seq1; <a href="/dbget-bin/www_bget?ko:K00234">K00234</a>  SDHA, SDH1; succinate dehydrogenase (ubiquinone) flavoprotein subunit [EC:1.3.5.1]
D      comp48752_c0_seq3; <a href="/dbget-bin/www_bget?ko:K00235">K00235</a>  SDHB, SDH2; succinate dehydrogenase (ubiquinone) iron-sulfur subunit [EC:1.3.5.1]
D      comp59000_c0_seq7; <a href="/dbget-bin/www_bget?ko:K00411">K00411</a>  UQCRFS1, RIP1, petA; ubiquinol-cytochrome c reductase iron-sulfur subunit [EC:1.10.2.2]
D      comp50305_c0_seq1; <a href="/dbget-bin/www_bget?ko:K00412">K00412</a>  CYTB, petB; ubiquinol-cytochrome c reductase cytochrome b subunit
D      comp55555_c0_seq1; <a href="/dbget-bin/www_bget?ko:K00413">K00413</a>  CYC1, CYT1, petC; ubiquinol-cytochrome c reductase cytochrome c1 subunit
D      comp56256_c4_seq1; <a href="/dbget-bin/www_bget?ko:K00417">K00417</a>  QCR7, UQCRB; ubiquinol-cytochrome c reductase subunit 7
D      comp46294_c0_seq1; <a href="/dbget-bin/www_bget?ko:K00419">K00419</a>  QCR9, UCRC; ubiquinol-cytochrome c reductase subunit 9
D      comp56527_c0_seq2; <a href="/dbget-bin/www_bget?ko:K02257">K02257</a>  COX10; protoheme IX farnesyltransferase [EC:2.5.1.-]
D      comp54487_c0_seq1; <a href="/dbget-bin/www_bget?ko:K02262">K02262</a>  COX3; cytochrome c oxidase subunit 3
D      comp54851_c0_seq1; <a href="/dbget-bin/www_bget?ko:K02256">K02256</a>  COX1; cytochrome c oxidase subunit 1 [EC:1.9.3.1]
D      comp50238_c0_seq4; <a href="/dbget-bin/www_bget?ko:K02265">K02265</a>  COX5B; cytochrome c oxidase subunit 5b
D      comp31089_c0_seq1; <a href="/dbget-bin/www_bget?ko:K02266">K02266</a>  COX6A; cytochrome c oxidase subunit 6a
D      comp53010_c0_seq2; <a href="/dbget-bin/www_bget?ko:K02267">K02267</a>  COX6B; cytochrome c oxidase subunit 6b
D      comp60777_c0_seq1; <a href="/dbget-bin/www_bget?ko:K02267">K02267</a>  COX6B; cytochrome c oxidase subunit 6b
D      comp52223_c0_seq3; <a href="/dbget-bin/www_bget?ko:K02258">K02258</a>  COX11; cytochrome c oxidase assembly protein subunit 11
D      comp51693_c0_seq1; <a href="/dbget-bin/www_bget?ko:K02259">K02259</a>  COX15; cytochrome c oxidase assembly protein subunit 15
D      comp41002_c0_seq1; <a href="/dbget-bin/www_bget?ko:K02260">K02260</a>  COX17; cytochrome c oxidase assembly protein subunit 17
D      comp88082_c0_seq1; <a href="/dbget-bin/www_bget?ko:K02112">K02112</a>  ATPF1B, atpD; F-type H+-transporting ATPase subunit beta [EC:3.6.3.14]
D      comp43834_c0_seq1; <a href="/dbget-bin/www_bget?ko:K02115">K02115</a>  ATPF1G, atpG; F-type H+-transporting ATPase subunit gamma [EC:3.6.3.14]
D      comp46990_c0_seq1; <a href="/dbget-bin/www_bget?ko:K02115">K02115</a>  ATPF1G, atpG; F-type H+-transporting ATPase subunit gamma [EC:3.6.3.14]
D      comp46751_c0_seq1; <a href="/dbget-bin/www_bget?ko:K02113">K02113</a>  ATPF1D, atpH; F-type H+-transporting ATPase subunit delta [EC:3.6.3.14]
D      comp51469_c0_seq4; <a href="/dbget-bin/www_bget?ko:K02109">K02109</a>  ATPF0B, atpF; F-type H+-transporting ATPase subunit b [EC:3.6.3.14]
D      comp78690_c0_seq1; <a href="/dbget-bin/www_bget?ko:K02110">K02110</a>  ATPF0C, atpE; F-type H+-transporting ATPase subunit c [EC:3.6.3.14]
D      comp59489_c1_seq1; <a href="/dbget-bin/www_bget?ko:K02108">K02108</a>  ATPF0A, atpB; F-type H+-transporting ATPase subunit a [EC:3.6.3.14]
D      comp27470_c0_seq1; <a href="/dbget-bin/www_bget?ko:K02135">K02135</a>  ATPeF1E, ATP5E; F-type H+-transporting ATPase subunit epsilon [EC:3.6.3.14]
D      comp44226_c0_seq1; <a href="/dbget-bin/www_bget?ko:K02134">K02134</a>  ATPeF1D, ATP5D; F-type H+-transporting ATPase subunit delta [EC:3.6.3.14]
D      comp59042_c0_seq3; <a href="/dbget-bin/www_bget?ko:K02133">K02133</a>  ATPeF1B, ATP5B; F-type H+-transporting ATPase subunit beta [EC:3.6.3.14]
D      comp46732_c0_seq1; <a href="/dbget-bin/www_bget?ko:K02136">K02136</a>  ATPeF1G, ATP5C1; F-type H+-transporting ATPase subunit gamma [EC:3.6.3.14]
D      comp47715_c0_seq1; <a href="/dbget-bin/www_bget?ko:K02132">K02132</a>  ATPeF1A, ATP5A1; F-type H+-transporting ATPase subunit alpha [EC:3.6.3.14]
D      comp40708_c0_seq1; <a href="/dbget-bin/www_bget?ko:K02137">K02137</a>  ATPeF1O, ATP5O; F-type H+-transporting ATPase oligomycin sensitivity conferral protein [EC:3.6.3.14]
D      comp28697_c0_seq1; <a href="/dbget-bin/www_bget?ko:K02128">K02128</a>  ATPeF0C, ATP5G; F-type H+-transporting ATPase subunit c [EC:3.6.3.14]
D      comp53752_c0_seq2; <a href="/dbget-bin/www_bget?ko:K02138">K02138</a>  ATPeFD, ATP5H; F-type H+-transporting ATPase subunit d [EC:3.6.3.14]
D      comp53765_c0_seq1; <a href="/dbget-bin/www_bget?ko:K02140">K02140</a>  ATPeFG, ATP5L; F-type H+-transporting ATPase subunit g [EC:3.6.3.14]
D      comp56727_c0_seq1; <a href="/dbget-bin/www_bget?ko:K02146">K02146</a>  ATPeVAC39, ATP6D; V-type H+-transporting ATPase subunit AC39 [EC:3.6.3.14]
D      comp44275_c0_seq1; <a href="/dbget-bin/www_bget?ko:K02151">K02151</a>  ATPeVF, ATP6S14; V-type H+-transporting ATPase subunit F [EC:3.6.3.14]
D      comp54162_c0_seq1; <a href="/dbget-bin/www_bget?ko:K02151">K02151</a>  ATPeVF, ATP6S14; V-type H+-transporting ATPase subunit F [EC:3.6.3.14]
D      comp57857_c0_seq2; <a href="/dbget-bin/www_bget?ko:K02148">K02148</a>  ATPeVC, ATP6C; V-type H+-transporting ATPase subunit C [EC:3.6.3.14]
D      comp59356_c0_seq2; <a href="/dbget-bin/www_bget?ko:K02145">K02145</a>  ATPeVA, ATP6A1; V-type H+-transporting ATPase subunit A [EC:3.6.3.14]
D      comp56911_c1_seq1; <a href="/dbget-bin/www_bget?ko:K02147">K02147</a>  ATPeVB, ATP6B1; V-type H+-transporting ATPase subunit B [EC:3.6.3.14]
D      comp52173_c0_seq1; <a href="/dbget-bin/www_bget?ko:K02150">K02150</a>  ATPeVE, ATP6E; V-type H+-transporting ATPase subunit E [EC:3.6.3.14]
D      comp53304_c0_seq1; <a href="/dbget-bin/www_bget?ko:K02150">K02150</a>  ATPeVE, ATP6E; V-type H+-transporting ATPase subunit E [EC:3.6.3.14]
D      comp47491_c0_seq1; <a href="/dbget-bin/www_bget?ko:K02155">K02155</a>  ATPeVPL, ATP6L; V-type H+-transporting ATPase 16kDa proteolipid subunit [EC:3.6.3.14]
D      comp53002_c1_seq1; <a href="/dbget-bin/www_bget?ko:K02155">K02155</a>  ATPeVPL, ATP6L; V-type H+-transporting ATPase 16kDa proteolipid subunit [EC:3.6.3.14]
D      comp47902_c0_seq4; <a href="/dbget-bin/www_bget?ko:K03661">K03661</a>  ATPeVPF, ATP6F; V-type H+-transporting ATPase 21kDa proteolipid subunit [EC:3.6.3.14]
D      comp58841_c0_seq6; <a href="/dbget-bin/www_bget?ko:K02154">K02154</a>  ATPeVI, ATP6N1A; V-type H+-transporting ATPase subunit I [EC:3.6.3.14]
D      comp59312_c0_seq2; <a href="/dbget-bin/www_bget?ko:K02154">K02154</a>  ATPeVI, ATP6N1A; V-type H+-transporting ATPase subunit I [EC:3.6.3.14]
D      comp58402_c1_seq1; <a href="/dbget-bin/www_bget?ko:K02149">K02149</a>  ATPeVD, ATP6M; V-type H+-transporting ATPase subunit D [EC:3.6.3.14]
D      comp52693_c0_seq1; <a href="/dbget-bin/www_bget?ko:K02153">K02153</a>  ATPeVH, ATP6H; V-type H+-transporting ATPase subunit H [EC:3.6.3.14]
D      comp59807_c0_seq1; <a href="/dbget-bin/www_bget?ko:K02152">K02152</a>  ATPeVG, ATP6G1; V-type H+-transporting ATPase subunit G [EC:3.6.3.14]
D      comp56941_c0_seq3; <a href="/dbget-bin/www_bget?ko:K02144">K02144</a>  ATPeV54kD; V-type H+-transporting ATPase 54 kD subunit [EC:3.6.3.14]
D      comp57555_c0_seq2; <a href="/dbget-bin/www_bget?ko:K01535">K01535</a>  E3.6.3.6; H+-transporting ATPase [EC:3.6.3.6]
D      comp59196_c1_seq9; <a href="/dbget-bin/www_bget?ko:K01535">K01535</a>  E3.6.3.6; H+-transporting ATPase [EC:3.6.3.6]
D      comp59815_c0_seq3; <a href="/dbget-bin/www_bget?ko:K01535">K01535</a>  E3.6.3.6; H+-transporting ATPase [EC:3.6.3.6]
D      comp50408_c0_seq2; <a href="/dbget-bin/www_bget?ko:K01507">K01507</a>  ppa; inorganic pyrophosphatase [EC:3.6.1.1]
D      comp51845_c0_seq13; <a href="/dbget-bin/www_bget?ko:K01507">K01507</a>  ppa; inorganic pyrophosphatase [EC:3.6.1.1]
D      comp53310_c0_seq2; <a href="/dbget-bin/www_bget?ko:K01507">K01507</a>  ppa; inorganic pyrophosphatase [EC:3.6.1.1]
D      comp56947_c1_seq2; <a href="/dbget-bin/www_bget?ko:K01507">K01507</a>  ppa; inorganic pyrophosphatase [EC:3.6.1.1]
D      comp57838_c0_seq21; <a href="/dbget-bin/www_bget?ko:K01507">K01507</a>  ppa; inorganic pyrophosphatase [EC:3.6.1.1]
D      comp58487_c0_seq2; <a href="/dbget-bin/www_bget?ko:K01507">K01507</a>  ppa; inorganic pyrophosphatase [EC:3.6.1.1]
C    00195 Photosynthesis [PATH:<a href="http://www.kegg.jp/kegg-bin/show_pathway?@ko00195/K02703/K02704/K02705/K02707/K02710/K02716/K02717/K08901/K03541/K03542/K02721/K02723/K08902/K08903/K02692/K02693/K02694/K08905/K02695/K02698/K02699/K02701/K14332/K02634/K02639/K02641/K08906/K02112/K02115/K02113/K02109/K02110/K02108">ko00195</a>]
D      comp39361_c1_seq1; <a href="/dbget-bin/www_bget?ko:K02703">K02703</a>  psbA; photosystem II P680 reaction center D1 protein
D      comp46135_c0_seq5; <a href="/dbget-bin/www_bget?ko:K02704">K02704</a>  psbB; photosystem II CP47 chlorophyll apoprotein
D      comp55438_c3_seq1; <a href="/dbget-bin/www_bget?ko:K02705">K02705</a>  psbC; photosystem II CP43 chlorophyll apoprotein
D      comp36511_c0_seq1; <a href="/dbget-bin/www_bget?ko:K02707">K02707</a>  psbE; photosystem II cytochrome b559 subunit alpha
D      comp41913_c0_seq2; <a href="/dbget-bin/www_bget?ko:K02710">K02710</a>  psbI; photosystem II PsbI protein
D      comp53296_c0_seq3; <a href="/dbget-bin/www_bget?ko:K02716">K02716</a>  psbO; photosystem II oxygen-evolving enhancer protein 1
D      comp52067_c0_seq1; <a href="/dbget-bin/www_bget?ko:K02717">K02717</a>  psbP; photosystem II oxygen-evolving enhancer protein 2
D      comp49672_c0_seq1; <a href="/dbget-bin/www_bget?ko:K08901">K08901</a>  psbQ; photosystem II oxygen-evolving enhancer protein 3
D      comp50456_c0_seq1; <a href="/dbget-bin/www_bget?ko:K08901">K08901</a>  psbQ; photosystem II oxygen-evolving enhancer protein 3
D      comp54986_c0_seq2; <a href="/dbget-bin/www_bget?ko:K08901">K08901</a>  psbQ; photosystem II oxygen-evolving enhancer protein 3
D      comp42736_c0_seq1; <a href="/dbget-bin/www_bget?ko:K03541">K03541</a>  psbR; photosystem II 10kDa protein
D      comp43817_c0_seq1; <a href="/dbget-bin/www_bget?ko:K03542">K03542</a>  psbS; photosystem II 22kDa protein
D      comp18764_c0_seq1; <a href="/dbget-bin/www_bget?ko:K02721">K02721</a>  psbW; photosystem II PsbW protein
D      comp59471_c2_seq2; <a href="/dbget-bin/www_bget?ko:K02721">K02721</a>  psbW; photosystem II PsbW protein
D      comp49699_c0_seq1; <a href="/dbget-bin/www_bget?ko:K02723">K02723</a>  psbY; photosystem II PsbY protein
D      comp35384_c0_seq1; <a href="/dbget-bin/www_bget?ko:K08902">K08902</a>  psb27; photosystem II Psb27 protein
D      comp54399_c0_seq1; <a href="/dbget-bin/www_bget?ko:K08903">K08903</a>  psb28; photosystem II 13kDa protein
D      comp52409_c0_seq1; <a href="/dbget-bin/www_bget?ko:K02692">K02692</a>  psaD; photosystem I subunit II
D      comp48021_c0_seq1; <a href="/dbget-bin/www_bget?ko:K02693">K02693</a>  psaE; photosystem I subunit IV
D      comp47284_c1_seq1; <a href="/dbget-bin/www_bget?ko:K02694">K02694</a>  psaF; photosystem I subunit III
D      comp33685_c0_seq1; <a href="/dbget-bin/www_bget?ko:K08905">K08905</a>  psaG; photosystem I subunit V
D      comp53579_c0_seq2; <a href="/dbget-bin/www_bget?ko:K02695">K02695</a>  psaH; photosystem I subunit VI
D      comp50667_c0_seq1; <a href="/dbget-bin/www_bget?ko:K02698">K02698</a>  psaK; photosystem I subunit X
D      comp60232_c0_seq1; <a href="/dbget-bin/www_bget?ko:K02699">K02699</a>  psaL; photosystem I subunit XI
D      comp48604_c0_seq1; <a href="/dbget-bin/www_bget?ko:K02701">K02701</a>  psaN; photosystem I subunit PsaN
D      comp42828_c0_seq1; <a href="/dbget-bin/www_bget?ko:K14332">K14332</a>  psaO; photosystem I subunit PsaO
D      comp55575_c0_seq2; <a href="/dbget-bin/www_bget?ko:K02634">K02634</a>  petA; apocytochrome f
D      comp49334_c1_seq5; <a href="/dbget-bin/www_bget?ko:K02639">K02639</a>  petF; ferredoxin
D      comp52164_c0_seq2; <a href="/dbget-bin/www_bget?ko:K02639">K02639</a>  petF; ferredoxin
D      comp53204_c0_seq2; <a href="/dbget-bin/www_bget?ko:K02639">K02639</a>  petF; ferredoxin
D      comp164484_c0_seq1; <a href="/dbget-bin/www_bget?ko:K02639">K02639</a>  petF; ferredoxin
D      comp54654_c0_seq1; <a href="/dbget-bin/www_bget?ko:K02641">K02641</a>  petH; ferredoxin--NADP+ reductase [EC:1.18.1.2]
D      comp56270_c0_seq1; <a href="/dbget-bin/www_bget?ko:K02641">K02641</a>  petH; ferredoxin--NADP+ reductase [EC:1.18.1.2]
D      comp52846_c0_seq6; <a href="/dbget-bin/www_bget?ko:K08906">K08906</a>  petJ; cytochrome c6
D      comp88082_c0_seq1; <a href="/dbget-bin/www_bget?ko:K02112">K02112</a>  ATPF1B, atpD; F-type H+-transporting ATPase subunit beta [EC:3.6.3.14]
D      comp43834_c0_seq1; <a href="/dbget-bin/www_bget?ko:K02115">K02115</a>  ATPF1G, atpG; F-type H+-transporting ATPase subunit gamma [EC:3.6.3.14]
D      comp46990_c0_seq1; <a href="/dbget-bin/www_bget?ko:K02115">K02115</a>  ATPF1G, atpG; F-type H+-transporting ATPase subunit gamma [EC:3.6.3.14]
D      comp46751_c0_seq1; <a href="/dbget-bin/www_bget?ko:K02113">K02113</a>  ATPF1D, atpH; F-type H+-transporting ATPase subunit delta [EC:3.6.3.14]
D      comp51469_c0_seq4; <a href="/dbget-bin/www_bget?ko:K02109">K02109</a>  ATPF0B, atpF; F-type H+-transporting ATPase subunit b [EC:3.6.3.14]
D      comp78690_c0_seq1; <a href="/dbget-bin/www_bget?ko:K02110">K02110</a>  ATPF0C, atpE; F-type H+-transporting ATPase subunit c [EC:3.6.3.14]
D      comp59489_c1_seq1; <a href="/dbget-bin/www_bget?ko:K02108">K02108</a>  ATPF0A, atpB; F-type H+-transporting ATPase subunit a [EC:3.6.3.14]
C    00196 Photosynthesis - antenna proteins [PATH:<a href="http://www.kegg.jp/kegg-bin/show_pathway?@ko00196/K08907/K08908/K08909/K08910/K08911/K08912/K08913/K08914/K08915/K08916/K08917">ko00196</a>]
D      comp43838_c0_seq1; <a href="/dbget-bin/www_bget?ko:K08907">K08907</a>  LHCA1; light-harvesting complex I chlorophyll a/b binding protein 1
D      comp51821_c0_seq1; <a href="/dbget-bin/www_bget?ko:K08908">K08908</a>  LHCA2; light-harvesting complex I chlorophyll a/b binding protein 2
D      comp56977_c2_seq2; <a href="/dbget-bin/www_bget?ko:K08909">K08909</a>  LHCA3; light-harvesting complex I chlorophyll a/b binding protein 3
D      comp56812_c0_seq1; <a href="/dbget-bin/www_bget?ko:K08910">K08910</a>  LHCA4; light-harvesting complex I chlorophyll a/b binding protein 4
D      comp50186_c0_seq11; <a href="/dbget-bin/www_bget?ko:K08911">K08911</a>  LHCA5; light-harvesting complex I chlorophyll a/b binding protein 5
D      comp58238_c1_seq4; <a href="/dbget-bin/www_bget?ko:K08912">K08912</a>  LHCB1; light-harvesting complex II chlorophyll a/b binding protein 1
D      comp42605_c0_seq1; <a href="/dbget-bin/www_bget?ko:K08913">K08913</a>  LHCB2; light-harvesting complex II chlorophyll a/b binding protein 2
D      comp58670_c1_seq1; <a href="/dbget-bin/www_bget?ko:K08914">K08914</a>  LHCB3; light-harvesting complex II chlorophyll a/b binding protein 3
D      comp51463_c0_seq1; <a href="/dbget-bin/www_bget?ko:K08915">K08915</a>  LHCB4; light-harvesting complex II chlorophyll a/b binding protein 4
D      comp56396_c2_seq1; <a href="/dbget-bin/www_bget?ko:K08916">K08916</a>  LHCB5; light-harvesting complex II chlorophyll a/b binding protein 5
D      comp55378_c0_seq2; <a href="/dbget-bin/www_bget?ko:K08917">K08917</a>  LHCB6; light-harvesting complex II chlorophyll a/b binding protein 6
C    00194 Photosynthesis proteins [BR:ko00194]
C    00710 Carbon fixation in photosynthetic organisms [PATH:<a href="http://www.kegg.jp/kegg-bin/show_pathway?@ko00710/K01601/K01602/K00927/K00134/K05298/K01623/K03841/K00615/K01100/K01807/K00855/K01803/K01783/K01595/K14454/K01610/K00814/K14272/K01006/K00029/K00051/K14455/K00025/K00026/K00028">ko00710</a>]
D      comp93954_c0_seq1; <a href="/dbget-bin/www_bget?ko:K01601">K01601</a>  rbcL; ribulose-bisphosphate carboxylase large chain [EC:4.1.1.39]
D      comp48154_c0_seq1; <a href="/dbget-bin/www_bget?ko:K01602">K01602</a>  rbcS; ribulose-bisphosphate carboxylase small chain [EC:4.1.1.39]
D      comp51513_c0_seq2; <a href="/dbget-bin/www_bget?ko:K01602">K01602</a>  rbcS; ribulose-bisphosphate carboxylase small chain [EC:4.1.1.39]
D      comp43783_c0_seq1; <a href="/dbget-bin/www_bget?ko:K00927">K00927</a>  PGK, pgk; phosphoglycerate kinase [EC:2.7.2.3]
D      comp53977_c0_seq1; <a href="/dbget-bin/www_bget?ko:K00134">K00134</a>  GAPDH, gapA; glyceraldehyde 3-phosphate dehydrogenase [EC:1.2.1.12]
D      comp79792_c0_seq1; <a href="/dbget-bin/www_bget?ko:K00134">K00134</a>  GAPDH, gapA; glyceraldehyde 3-phosphate dehydrogenase [EC:1.2.1.12]
D      comp52317_c0_seq1; <a href="/dbget-bin/www_bget?ko:K05298">K05298</a>  GAPA; glyceraldehyde-3-phosphate dehydrogenase (NADP+) (phosphorylating) [EC:1.2.1.13]
D      comp56174_c0_seq2; <a href="/dbget-bin/www_bget?ko:K05298">K05298</a>  GAPA; glyceraldehyde-3-phosphate dehydrogenase (NADP+) (phosphorylating) [EC:1.2.1.13]
D      comp55587_c0_seq2; <a href="/dbget-bin/www_bget?ko:K01623">K01623</a>  ALDO; fructose-bisphosphate aldolase, class I [EC:4.1.2.13]
D      comp56171_c0_seq5; <a href="/dbget-bin/www_bget?ko:K01623">K01623</a>  ALDO; fructose-bisphosphate aldolase, class I [EC:4.1.2.13]
D      comp56625_c2_seq1; <a href="/dbget-bin/www_bget?ko:K01623">K01623</a>  ALDO; fructose-bisphosphate aldolase, class I [EC:4.1.2.13]
D      comp36090_c0_seq1; <a href="/dbget-bin/www_bget?ko:K03841">K03841</a>  FBP, fbp; fructose-1,6-bisphosphatase I [EC:3.1.3.11]
D      comp48711_c0_seq4; <a href="/dbget-bin/www_bget?ko:K03841">K03841</a>  FBP, fbp; fructose-1,6-bisphosphatase I [EC:3.1.3.11]
D      comp57489_c0_seq9; <a href="/dbget-bin/www_bget?ko:K03841">K03841</a>  FBP, fbp; fructose-1,6-bisphosphatase I [EC:3.1.3.11]
D      comp58063_c1_seq3; <a href="/dbget-bin/www_bget?ko:K00615">K00615</a>  E2.2.1.1, tktA, tktB; transketolase [EC:2.2.1.1]
D      comp32241_c0_seq1; <a href="/dbget-bin/www_bget?ko:K01100">K01100</a>  E3.1.3.37; sedoheptulose-bisphosphatase [EC:3.1.3.37]
D      comp47244_c0_seq1; <a href="/dbget-bin/www_bget?ko:K01807">K01807</a>  rpiA; ribose 5-phosphate isomerase A [EC:5.3.1.6]
D      comp47962_c0_seq1; <a href="/dbget-bin/www_bget?ko:K01807">K01807</a>  rpiA; ribose 5-phosphate isomerase A [EC:5.3.1.6]
D      comp56592_c0_seq8; <a href="/dbget-bin/www_bget?ko:K01807">K01807</a>  rpiA; ribose 5-phosphate isomerase A [EC:5.3.1.6]
D      comp34360_c0_seq1; <a href="/dbget-bin/www_bget?ko:K00855">K00855</a>  PRK, prkB; phosphoribulokinase [EC:2.7.1.19]
D      comp53917_c1_seq1; <a href="/dbget-bin/www_bget?ko:K01803">K01803</a>  TPI, tpiA; triosephosphate isomerase (TIM) [EC:5.3.1.1]
D      comp58151_c0_seq1; <a href="/dbget-bin/www_bget?ko:K01803">K01803</a>  TPI, tpiA; triosephosphate isomerase (TIM) [EC:5.3.1.1]
D      comp52012_c0_seq17; <a href="/dbget-bin/www_bget?ko:K01783">K01783</a>  rpe, RPE; ribulose-phosphate 3-epimerase [EC:5.1.3.1]
D      comp56499_c0_seq1; <a href="/dbget-bin/www_bget?ko:K01783">K01783</a>  rpe, RPE; ribulose-phosphate 3-epimerase [EC:5.1.3.1]
D      comp59195_c0_seq1; <a href="/dbget-bin/www_bget?ko:K01595">K01595</a>  ppc; phosphoenolpyruvate carboxylase [EC:4.1.1.31]
D      comp59786_c0_seq2; <a href="/dbget-bin/www_bget?ko:K01595">K01595</a>  ppc; phosphoenolpyruvate carboxylase [EC:4.1.1.31]
D      comp44326_c0_seq1; <a href="/dbget-bin/www_bget?ko:K14454">K14454</a>  GOT1; aspartate aminotransferase, cytoplasmic [EC:2.6.1.1]
D      comp58553_c1_seq3; <a href="/dbget-bin/www_bget?ko:K01610">K01610</a>  E4.1.1.49, pckA; phosphoenolpyruvate carboxykinase (ATP) [EC:4.1.1.49]
D      comp57824_c0_seq1; <a href="/dbget-bin/www_bget?ko:K00814">K00814</a>  GPT, ALT; alanine transaminase [EC:2.6.1.2]
D      comp57880_c0_seq2; <a href="/dbget-bin/www_bget?ko:K14272">K14272</a>  GGAT; glutamate--glyoxylate aminotransferase [EC:2.6.1.4 2.6.1.2 2.6.1.44 2.6.1.-]
D      comp59921_c0_seq3; <a href="/dbget-bin/www_bget?ko:K01006">K01006</a>  ppdK; pyruvate,orthophosphate dikinase [EC:2.7.9.1]
D      comp46119_c0_seq2; <a href="/dbget-bin/www_bget?ko:K00029">K00029</a>  E1.1.1.40, maeB; malate dehydrogenase (oxaloacetate-decarboxylating)(NADP+) [EC:1.1.1.40]
D      comp58776_c0_seq5; <a href="/dbget-bin/www_bget?ko:K00029">K00029</a>  E1.1.1.40, maeB; malate dehydrogenase (oxaloacetate-decarboxylating)(NADP+) [EC:1.1.1.40]
D      comp59428_c0_seq18; <a href="/dbget-bin/www_bget?ko:K00051">K00051</a>  E1.1.1.82; malate dehydrogenase (NADP+) [EC:1.1.1.82]
D      comp52813_c2_seq3; <a href="/dbget-bin/www_bget?ko:K14455">K14455</a>  GOT2; aspartate aminotransferase, mitochondrial [EC:2.6.1.1]
D      comp50573_c0_seq1; <a href="/dbget-bin/www_bget?ko:K00025">K00025</a>  MDH1; malate dehydrogenase [EC:1.1.1.37]
D      comp35210_c0_seq1; <a href="/dbget-bin/www_bget?ko:K00026">K00026</a>  MDH2; malate dehydrogenase [EC:1.1.1.37]
D      comp49324_c0_seq1; <a href="/dbget-bin/www_bget?ko:K00026">K00026</a>  MDH2; malate dehydrogenase [EC:1.1.1.37]
D      comp55544_c0_seq2; <a href="/dbget-bin/www_bget?ko:K00026">K00026</a>  MDH2; malate dehydrogenase [EC:1.1.1.37]
D      comp58280_c0_seq2; <a href="/dbget-bin/www_bget?ko:K00026">K00026</a>  MDH2; malate dehydrogenase [EC:1.1.1.37]
D      comp51667_c0_seq1; <a href="/dbget-bin/www_bget?ko:K00028">K00028</a>  E1.1.1.39; malate dehydrogenase (decarboxylating) [EC:1.1.1.39]
D      comp58682_c0_seq5; <a href="/dbget-bin/www_bget?ko:K00028">K00028</a>  E1.1.1.39; malate dehydrogenase (decarboxylating) [EC:1.1.1.39]
C    00720 Carbon fixation pathways in prokaryotes [PATH:<a href="http://www.kegg.jp/kegg-bin/show_pathway?@ko00720/K01595/K01679/K00626/K00031/K01681/K01648/K01962/K02160/K01961/K01963/K01938/K00297/K01895">ko00720</a>]
D      comp59195_c0_seq1; <a href="/dbget-bin/www_bget?ko:K01595">K01595</a>  ppc; phosphoenolpyruvate carboxylase [EC:4.1.1.31]
D      comp59786_c0_seq2; <a href="/dbget-bin/www_bget?ko:K01595">K01595</a>  ppc; phosphoenolpyruvate carboxylase [EC:4.1.1.31]
D      comp52714_c0_seq1; <a href="/dbget-bin/www_bget?ko:K01679">K01679</a>  E4.2.1.2B, fumC; fumarate hydratase, class II [EC:4.2.1.2]
D      comp55836_c0_seq2; <a href="/dbget-bin/www_bget?ko:K00626">K00626</a>  E2.3.1.9, atoB; acetyl-CoA C-acetyltransferase [EC:2.3.1.9]
D      comp58238_c0_seq1; <a href="/dbget-bin/www_bget?ko:K00626">K00626</a>  E2.3.1.9, atoB; acetyl-CoA C-acetyltransferase [EC:2.3.1.9]
D      comp49786_c0_seq1; <a href="/dbget-bin/www_bget?ko:K00031">K00031</a>  IDH1, IDH2, icd; isocitrate dehydrogenase [EC:1.1.1.42]
D      comp52337_c0_seq1; <a href="/dbget-bin/www_bget?ko:K00031">K00031</a>  IDH1, IDH2, icd; isocitrate dehydrogenase [EC:1.1.1.42]
D      comp59570_c0_seq1; <a href="/dbget-bin/www_bget?ko:K01681">K01681</a>  ACO, acnA; aconitate hydratase [EC:4.2.1.3]
D      comp59759_c0_seq2; <a href="/dbget-bin/www_bget?ko:K01681">K01681</a>  ACO, acnA; aconitate hydratase [EC:4.2.1.3]
D      comp50429_c0_seq5; <a href="/dbget-bin/www_bget?ko:K01648">K01648</a>  ACLY; ATP citrate (pro-S)-lyase [EC:2.3.3.8]
D      comp57456_c0_seq1; <a href="/dbget-bin/www_bget?ko:K01648">K01648</a>  ACLY; ATP citrate (pro-S)-lyase [EC:2.3.3.8]
D      comp58102_c0_seq1; <a href="/dbget-bin/www_bget?ko:K01648">K01648</a>  ACLY; ATP citrate (pro-S)-lyase [EC:2.3.3.8]
D      comp58271_c1_seq2; <a href="/dbget-bin/www_bget?ko:K01962">K01962</a>  accA; acetyl-CoA carboxylase carboxyl transferase subunit alpha [EC:6.4.1.2]
D      comp53156_c0_seq1; <a href="/dbget-bin/www_bget?ko:K02160">K02160</a>  accB, bccP; acetyl-CoA carboxylase biotin carboxyl carrier protein
D      comp44215_c0_seq1; <a href="/dbget-bin/www_bget?ko:K01961">K01961</a>  accC; acetyl-CoA carboxylase, biotin carboxylase subunit [EC:6.4.1.2 6.3.4.14]
D      comp29918_c0_seq1; <a href="/dbget-bin/www_bget?ko:K01963">K01963</a>  accD; acetyl-CoA carboxylase carboxyl transferase subunit beta [EC:6.4.1.2]
D      comp55395_c0_seq1; <a href="/dbget-bin/www_bget?ko:K01938">K01938</a>  fhs; formate--tetrahydrofolate ligase [EC:6.3.4.3]
D      comp60433_c0_seq1; <a href="/dbget-bin/www_bget?ko:K00297">K00297</a>  metF, MTHFR; methylenetetrahydrofolate reductase (NADPH) [EC:1.5.1.20]
D      comp54734_c0_seq1; <a href="/dbget-bin/www_bget?ko:K01895">K01895</a>  ACSS, acs; acetyl-CoA synthetase [EC:6.2.1.1]
C    00680 Methane metabolism [PATH:<a href="http://www.kegg.jp/kegg-bin/show_pathway?@ko00680/K00121/K01070/K00122/K00600/K00830/K01689/K01595/K01623/K03841/K00850/K00441/K01895/K01834/K15633/K15634/K00058/K00831/K01079">ko00680</a>]
D      comp32193_c0_seq3; <a href="/dbget-bin/www_bget?ko:K00121">K00121</a>  frmA, ADH5, adhC; S-(hydroxymethyl)glutathione dehydrogenase / alcohol dehydrogenase [EC:1.1.1.284 1.1.1.1]
D      comp55546_c0_seq1; <a href="/dbget-bin/www_bget?ko:K00121">K00121</a>  frmA, ADH5, adhC; S-(hydroxymethyl)glutathione dehydrogenase / alcohol dehydrogenase [EC:1.1.1.284 1.1.1.1]
D      comp59166_c0_seq7; <a href="/dbget-bin/www_bget?ko:K01070">K01070</a>  frmB, ESD, fghA; S-formylglutathione hydrolase [EC:3.1.2.12]
D      comp41702_c0_seq1; <a href="/dbget-bin/www_bget?ko:K00122">K00122</a>  FDH; formate dehydrogenase [EC:1.2.1.2]
D      comp54510_c0_seq1; <a href="/dbget-bin/www_bget?ko:K00600">K00600</a>  glyA, SHMT; glycine hydroxymethyltransferase [EC:2.1.2.1]
D      comp56200_c0_seq1; <a href="/dbget-bin/www_bget?ko:K00600">K00600</a>  glyA, SHMT; glycine hydroxymethyltransferase [EC:2.1.2.1]
D      comp56514_c0_seq1; <a href="/dbget-bin/www_bget?ko:K00600">K00600</a>  glyA, SHMT; glycine hydroxymethyltransferase [EC:2.1.2.1]
D      comp58011_c1_seq1; <a href="/dbget-bin/www_bget?ko:K00600">K00600</a>  glyA, SHMT; glycine hydroxymethyltransferase [EC:2.1.2.1]
D      comp57990_c0_seq3; <a href="/dbget-bin/www_bget?ko:K00830">K00830</a>  AGXT; alanine-glyoxylate transaminase / serine-glyoxylate transaminase / serine-pyruvate transaminase [EC:2.6.1.44 2.6.1.45 2.6.1.51]
D      comp48115_c0_seq1; <a href="/dbget-bin/www_bget?ko:K01689">K01689</a>  ENO, eno; enolase [EC:4.2.1.11]
D      comp52568_c0_seq1; <a href="/dbget-bin/www_bget?ko:K01689">K01689</a>  ENO, eno; enolase [EC:4.2.1.11]
D      comp55496_c1_seq2; <a href="/dbget-bin/www_bget?ko:K01689">K01689</a>  ENO, eno; enolase [EC:4.2.1.11]
D      comp60595_c0_seq1; <a href="/dbget-bin/www_bget?ko:K01689">K01689</a>  ENO, eno; enolase [EC:4.2.1.11]
D      comp59195_c0_seq1; <a href="/dbget-bin/www_bget?ko:K01595">K01595</a>  ppc; phosphoenolpyruvate carboxylase [EC:4.1.1.31]
D      comp59786_c0_seq2; <a href="/dbget-bin/www_bget?ko:K01595">K01595</a>  ppc; phosphoenolpyruvate carboxylase [EC:4.1.1.31]
D      comp55587_c0_seq2; <a href="/dbget-bin/www_bget?ko:K01623">K01623</a>  ALDO; fructose-bisphosphate aldolase, class I [EC:4.1.2.13]
D      comp56171_c0_seq5; <a href="/dbget-bin/www_bget?ko:K01623">K01623</a>  ALDO; fructose-bisphosphate aldolase, class I [EC:4.1.2.13]
D      comp56625_c2_seq1; <a href="/dbget-bin/www_bget?ko:K01623">K01623</a>  ALDO; fructose-bisphosphate aldolase, class I [EC:4.1.2.13]
D      comp36090_c0_seq1; <a href="/dbget-bin/www_bget?ko:K03841">K03841</a>  FBP, fbp; fructose-1,6-bisphosphatase I [EC:3.1.3.11]
D      comp48711_c0_seq4; <a href="/dbget-bin/www_bget?ko:K03841">K03841</a>  FBP, fbp; fructose-1,6-bisphosphatase I [EC:3.1.3.11]
D      comp57489_c0_seq9; <a href="/dbget-bin/www_bget?ko:K03841">K03841</a>  FBP, fbp; fructose-1,6-bisphosphatase I [EC:3.1.3.11]
D      comp48562_c1_seq4; <a href="/dbget-bin/www_bget?ko:K00850">K00850</a>  pfkA, PFK; 6-phosphofructokinase 1 [EC:2.7.1.11]
D      comp49838_c0_seq1; <a href="/dbget-bin/www_bget?ko:K00850">K00850</a>  pfkA, PFK; 6-phosphofructokinase 1 [EC:2.7.1.11]
D      comp55737_c1_seq1; <a href="/dbget-bin/www_bget?ko:K00850">K00850</a>  pfkA, PFK; 6-phosphofructokinase 1 [EC:2.7.1.11]
D      comp58144_c0_seq2; <a href="/dbget-bin/www_bget?ko:K00850">K00850</a>  pfkA, PFK; 6-phosphofructokinase 1 [EC:2.7.1.11]
D      comp53943_c0_seq10; <a href="/dbget-bin/www_bget?ko:K00441">K00441</a>  frhB; coenzyme F420 hydrogenase beta subunit [EC:1.12.98.1]
D      comp54734_c0_seq1; <a href="/dbget-bin/www_bget?ko:K01895">K01895</a>  ACSS, acs; acetyl-CoA synthetase [EC:6.2.1.1]
D      comp57359_c0_seq1; <a href="/dbget-bin/www_bget?ko:K01834">K01834</a>  PGAM, gpmA; 2,3-bisphosphoglycerate-dependent phosphoglycerate mutase [EC:5.4.2.1]
D      comp56438_c0_seq1; <a href="/dbget-bin/www_bget?ko:K15633">K15633</a>  gpmI; 2,3-bisphosphoglycerate-independent phosphoglycerate mutase [EC:5.4.2.1]
D      comp51488_c0_seq1; <a href="/dbget-bin/www_bget?ko:K15634">K15634</a>  gpmB; probable phosphoglycerate mutase [EC:5.4.2.1]
D      comp53729_c0_seq17; <a href="/dbget-bin/www_bget?ko:K15634">K15634</a>  gpmB; probable phosphoglycerate mutase [EC:5.4.2.1]
D      comp57702_c0_seq3; <a href="/dbget-bin/www_bget?ko:K00058">K00058</a>  serA, PHGDH; D-3-phosphoglycerate dehydrogenase [EC:1.1.1.95]
D      comp55250_c0_seq1; <a href="/dbget-bin/www_bget?ko:K00831">K00831</a>  serC, PSAT1; phosphoserine aminotransferase [EC:2.6.1.52]
D      comp23519_c0_seq1; <a href="/dbget-bin/www_bget?ko:K01079">K01079</a>  serB, PSPH; phosphoserine phosphatase [EC:3.1.3.3]
C    00910 Nitrogen metabolism [PATH:<a href="http://www.kegg.jp/kegg-bin/show_pathway?@ko00910/K01455/K01725/K01673/K01674/K00605/K10534/K00366/K00261/K00262/K01915/K00264/K01953/K00284/K00411/K00412/K00413/K03521/K03522">ko00910</a>]
D      comp50636_c0_seq1; <a href="/dbget-bin/www_bget?ko:K01455">K01455</a>  E3.5.1.49; formamidase [EC:3.5.1.49]
D      comp49813_c0_seq1; <a href="/dbget-bin/www_bget?ko:K01725">K01725</a>  cynS; cyanate lyase [EC:4.2.1.104]
D      comp52943_c0_seq1; <a href="/dbget-bin/www_bget?ko:K01673">K01673</a>  cynT, can; carbonic anhydrase [EC:4.2.1.1]
D      comp53832_c0_seq1; <a href="/dbget-bin/www_bget?ko:K01674">K01674</a>  cah; carbonic anhydrase [EC:4.2.1.1]
D      comp54095_c0_seq1; <a href="/dbget-bin/www_bget?ko:K01674">K01674</a>  cah; carbonic anhydrase [EC:4.2.1.1]
D      comp134591_c0_seq1; <a href="/dbget-bin/www_bget?ko:K01674">K01674</a>  cah; carbonic anhydrase [EC:4.2.1.1]
D      comp57653_c0_seq2; <a href="/dbget-bin/www_bget?ko:K00605">K00605</a>  gcvT, AMT; aminomethyltransferase [EC:2.1.2.10]
D      comp57972_c0_seq1; <a href="/dbget-bin/www_bget?ko:K10534">K10534</a>  NR; nitrate reductase (NAD(P)H) [EC:1.7.1.1 1.7.1.2 1.7.1.3]
D      comp47794_c0_seq1; <a href="/dbget-bin/www_bget?ko:K00366">K00366</a>  nirA; ferredoxin-nitrite reductase [EC:1.7.7.1]
D      comp58351_c0_seq1; <a href="/dbget-bin/www_bget?ko:K00261">K00261</a>  GLUD1_2, gdhA; glutamate dehydrogenase (NAD(P)+) [EC:1.4.1.3]
D      comp59273_c0_seq2; <a href="/dbget-bin/www_bget?ko:K00261">K00261</a>  GLUD1_2, gdhA; glutamate dehydrogenase (NAD(P)+) [EC:1.4.1.3]
D      comp59116_c0_seq13; <a href="/dbget-bin/www_bget?ko:K00262">K00262</a>  E1.4.1.4, gdhA; glutamate dehydrogenase (NADP+) [EC:1.4.1.4]
D      comp43799_c0_seq1; <a href="/dbget-bin/www_bget?ko:K01915">K01915</a>  glnA; glutamine synthetase [EC:6.3.1.2]
D      comp54256_c0_seq1; <a href="/dbget-bin/www_bget?ko:K01915">K01915</a>  glnA; glutamine synthetase [EC:6.3.1.2]
D      comp60126_c0_seq2; <a href="/dbget-bin/www_bget?ko:K00264">K00264</a>  GLT1; glutamate synthase (NADPH/NADH) [EC:1.4.1.13 1.4.1.14]
D      comp58038_c2_seq1; <a href="/dbget-bin/www_bget?ko:K01953">K01953</a>  asnB, ASNS; asparagine synthase (glutamine-hydrolysing) [EC:6.3.5.4]
D      comp31162_c0_seq1; <a href="/dbget-bin/www_bget?ko:K00284">K00284</a>  E1.4.7.1; glutamate synthase (ferredoxin) [EC:1.4.7.1]
D      comp59000_c0_seq7; <a href="/dbget-bin/www_bget?ko:K00411">K00411</a>  UQCRFS1, RIP1, petA; ubiquinol-cytochrome c reductase iron-sulfur subunit [EC:1.10.2.2]
D      comp50305_c0_seq1; <a href="/dbget-bin/www_bget?ko:K00412">K00412</a>  CYTB, petB; ubiquinol-cytochrome c reductase cytochrome b subunit
D      comp55555_c0_seq1; <a href="/dbget-bin/www_bget?ko:K00413">K00413</a>  CYC1, CYT1, petC; ubiquinol-cytochrome c reductase cytochrome c1 subunit
D      comp50239_c0_seq1; <a href="/dbget-bin/www_bget?ko:K03521">K03521</a>  fixA, etfB; electron transfer flavoprotein beta subunit
D      comp52341_c0_seq1; <a href="/dbget-bin/www_bget?ko:K03522">K03522</a>  fixB, etfA; electron transfer flavoprotein alpha subunit
C    00920 Sulfur metabolism [PATH:<a href="http://www.kegg.jp/kegg-bin/show_pathway?@ko00920/K13811/K00860/K01082/K15422/K05907/K00387/K01011/K00392/K01738/K13034/K00640/K01739/K01760">ko00920</a>]
D      comp52621_c0_seq3; <a href="/dbget-bin/www_bget?ko:K13811">K13811</a>  PAPSS; 3'-phosphoadenosine 5'-phosphosulfate synthase [EC:2.7.7.4 2.7.1.25]
D      comp58171_c1_seq1; <a href="/dbget-bin/www_bget?ko:K13811">K13811</a>  PAPSS; 3'-phosphoadenosine 5'-phosphosulfate synthase [EC:2.7.7.4 2.7.1.25]
D      comp41842_c0_seq2; <a href="/dbget-bin/www_bget?ko:K00860">K00860</a>  cysC; adenylylsulfate kinase [EC:2.7.1.25]
D      comp54385_c0_seq22; <a href="/dbget-bin/www_bget?ko:K00860">K00860</a>  cysC; adenylylsulfate kinase [EC:2.7.1.25]
D      comp56870_c0_seq1; <a href="/dbget-bin/www_bget?ko:K01082">K01082</a>  E3.1.3.7, cysQ, MET22, BPNT1; 3'(2'), 5'-bisphosphate nucleotidase [EC:3.1.3.7]
D      comp56893_c0_seq15; <a href="/dbget-bin/www_bget?ko:K01082">K01082</a>  E3.1.3.7, cysQ, MET22, BPNT1; 3'(2'), 5'-bisphosphate nucleotidase [EC:3.1.3.7]
D      comp57740_c0_seq3; <a href="/dbget-bin/www_bget?ko:K01082">K01082</a>  E3.1.3.7, cysQ, MET22, BPNT1; 3'(2'), 5'-bisphosphate nucleotidase [EC:3.1.3.7]
D      comp49703_c0_seq1; <a href="/dbget-bin/www_bget?ko:K15422">K15422</a>  SAL; 3'(2'), 5'-bisphosphate nucleotidase / inositol polyphosphate 1-phosphatase [EC:3.1.3.7 3.1.3.57]
D      comp58879_c0_seq1; <a href="/dbget-bin/www_bget?ko:K05907">K05907</a>  APR; adenylyl-sulfate reductase (glutathione) [EC:1.8.4.9]
D      comp53043_c0_seq1; <a href="/dbget-bin/www_bget?ko:K00387">K00387</a>  SUOX; sulfite oxidase [EC:1.8.3.1]
D      comp57574_c3_seq16; <a href="/dbget-bin/www_bget?ko:K01011">K01011</a>  TST, MPST, sseA; thiosulfate/3-mercaptopyruvate sulfurtransferase [EC:2.8.1.1 2.8.1.2]
D      comp55749_c0_seq1; <a href="/dbget-bin/www_bget?ko:K00392">K00392</a>  sir; sulfite reductase (ferredoxin) [EC:1.8.7.1]
D      comp42883_c0_seq2; <a href="/dbget-bin/www_bget?ko:K01738">K01738</a>  cysK; cysteine synthase A [EC:2.5.1.47]
D      comp49825_c0_seq1; <a href="/dbget-bin/www_bget?ko:K01738">K01738</a>  cysK; cysteine synthase A [EC:2.5.1.47]
D      comp53009_c0_seq1; <a href="/dbget-bin/www_bget?ko:K01738">K01738</a>  cysK; cysteine synthase A [EC:2.5.1.47]
D      comp57097_c1_seq1; <a href="/dbget-bin/www_bget?ko:K01738">K01738</a>  cysK; cysteine synthase A [EC:2.5.1.47]
D      comp47308_c0_seq2; <a href="/dbget-bin/www_bget?ko:K13034">K13034</a>  ATCYSC1; L-3-cyanoalanine synthase/ cysteine synthase [EC:2.5.1.47 4.4.1.9]
D      comp52345_c0_seq1; <a href="/dbget-bin/www_bget?ko:K00640">K00640</a>  cysE; serine O-acetyltransferase [EC:2.3.1.30]
D      comp53425_c0_seq1; <a href="/dbget-bin/www_bget?ko:K00640">K00640</a>  cysE; serine O-acetyltransferase [EC:2.3.1.30]
D      comp55766_c0_seq9; <a href="/dbget-bin/www_bget?ko:K00640">K00640</a>  cysE; serine O-acetyltransferase [EC:2.3.1.30]
D      comp57840_c0_seq1; <a href="/dbget-bin/www_bget?ko:K01739">K01739</a>  metB; cystathionine gamma-synthase [EC:2.5.1.48]
D      comp58813_c0_seq9; <a href="/dbget-bin/www_bget?ko:K01760">K01760</a>  metC; cystathionine beta-lyase [EC:4.4.1.8]
B
B  <b>Lipid metabolism</b>
C    00061 Fatty acid biosynthesis [PATH:<a href="http://www.kegg.jp/kegg-bin/show_pathway?@ko00061/K01962/K02160/K01961/K01963/K11262/K00645/K09458/K00648/K00059/K00208/K10781/K10782/K03921">ko00061</a>]
D      comp58271_c1_seq2; <a href="/dbget-bin/www_bget?ko:K01962">K01962</a>  accA; acetyl-CoA carboxylase carboxyl transferase subunit alpha [EC:6.4.1.2]
D      comp53156_c0_seq1; <a href="/dbget-bin/www_bget?ko:K02160">K02160</a>  accB, bccP; acetyl-CoA carboxylase biotin carboxyl carrier protein
D      comp44215_c0_seq1; <a href="/dbget-bin/www_bget?ko:K01961">K01961</a>  accC; acetyl-CoA carboxylase, biotin carboxylase subunit [EC:6.4.1.2 6.3.4.14]
D      comp29918_c0_seq1; <a href="/dbget-bin/www_bget?ko:K01963">K01963</a>  accD; acetyl-CoA carboxylase carboxyl transferase subunit beta [EC:6.4.1.2]
D      comp55805_c0_seq1; <a href="/dbget-bin/www_bget?ko:K11262">K11262</a>  ACAC; acetyl-CoA carboxylase / biotin carboxylase [EC:6.4.1.2 6.3.4.14]
D      comp46798_c0_seq1; <a href="/dbget-bin/www_bget?ko:K00645">K00645</a>  fabD; [acyl-carrier-protein] S-malonyltransferase [EC:2.3.1.39]
D      comp57393_c0_seq8; <a href="/dbget-bin/www_bget?ko:K09458">K09458</a>  fabF; 3-oxoacyl-[acyl-carrier-protein] synthase II [EC:2.3.1.179]
D      comp59219_c2_seq7; <a href="/dbget-bin/www_bget?ko:K09458">K09458</a>  fabF; 3-oxoacyl-[acyl-carrier-protein] synthase II [EC:2.3.1.179]
D      comp59217_c0_seq5; <a href="/dbget-bin/www_bget?ko:K00648">K00648</a>  fabH; 3-oxoacyl-[acyl-carrier-protein] synthase III [EC:2.3.1.180]
D      comp53141_c0_seq2; <a href="/dbget-bin/www_bget?ko:K00059">K00059</a>  fabG; 3-oxoacyl-[acyl-carrier protein] reductase [EC:1.1.1.100]
D      comp61361_c0_seq1; <a href="/dbget-bin/www_bget?ko:K00059">K00059</a>  fabG; 3-oxoacyl-[acyl-carrier protein] reductase [EC:1.1.1.100]
D      comp58443_c1_seq2; <a href="/dbget-bin/www_bget?ko:K00208">K00208</a>  fabI; enoyl-[acyl-carrier protein] reductase I [EC:1.3.1.9 1.3.1.10]
D      comp56973_c0_seq3; <a href="/dbget-bin/www_bget?ko:K10781">K10781</a>  FATB; fatty acyl-ACP thioesterase B [EC:3.1.2.14 3.1.2.-]
D      comp49631_c1_seq1; <a href="/dbget-bin/www_bget?ko:K10782">K10782</a>  FATA; fatty acyl-ACP thioesterase A [EC:3.1.2.14 3.1.2.-]
D      comp33295_c0_seq1; <a href="/dbget-bin/www_bget?ko:K03921">K03921</a>  DESA1; acyl-[acyl-carrier-protein] desaturase [EC:1.14.19.2]
D      comp47754_c0_seq1; <a href="/dbget-bin/www_bget?ko:K03921">K03921</a>  DESA1; acyl-[acyl-carrier-protein] desaturase [EC:1.14.19.2]
C    00062 Fatty acid elongation [PATH:<a href="http://www.kegg.jp/kegg-bin/show_pathway?@ko00062/K07512/K01074/K15397/K10251/K10703/K10258/K01068">ko00062</a>]
D      comp50914_c0_seq1; <a href="/dbget-bin/www_bget?ko:K07512">K07512</a>  MECR, NRBF1; mitochondrial trans-2-enoyl-CoA reductase [EC:1.3.1.38]
D      comp47323_c0_seq7; <a href="/dbget-bin/www_bget?ko:K01074">K01074</a>  PPT; palmitoyl-protein thioesterase [EC:3.1.2.22]
D      comp55742_c0_seq4; <a href="/dbget-bin/www_bget?ko:K01074">K01074</a>  PPT; palmitoyl-protein thioesterase [EC:3.1.2.22]
D      comp30313_c0_seq1; <a href="/dbget-bin/www_bget?ko:K15397">K15397</a>  KCS; 3-ketoacyl-CoA synthase [EC:2.3.1.199]
D      comp51763_c0_seq1; <a href="/dbget-bin/www_bget?ko:K15397">K15397</a>  KCS; 3-ketoacyl-CoA synthase [EC:2.3.1.199]
D      comp51788_c0_seq1; <a href="/dbget-bin/www_bget?ko:K15397">K15397</a>  KCS; 3-ketoacyl-CoA synthase [EC:2.3.1.199]
D      comp54011_c0_seq2; <a href="/dbget-bin/www_bget?ko:K15397">K15397</a>  KCS; 3-ketoacyl-CoA synthase [EC:2.3.1.199]
D      comp54955_c0_seq1; <a href="/dbget-bin/www_bget?ko:K15397">K15397</a>  KCS; 3-ketoacyl-CoA synthase [EC:2.3.1.199]
D      comp56429_c0_seq2; <a href="/dbget-bin/www_bget?ko:K15397">K15397</a>  KCS; 3-ketoacyl-CoA synthase [EC:2.3.1.199]
D      comp57474_c0_seq1; <a href="/dbget-bin/www_bget?ko:K15397">K15397</a>  KCS; 3-ketoacyl-CoA synthase [EC:2.3.1.199]
D      comp58365_c2_seq3; <a href="/dbget-bin/www_bget?ko:K15397">K15397</a>  KCS; 3-ketoacyl-CoA synthase [EC:2.3.1.199]
D      comp43937_c0_seq1; <a href="/dbget-bin/www_bget?ko:K10251">K10251</a>  HSD17B12, KAR, IFA38; 17beta-estradiol 17-dehydrogenase / very-long-chain 3-oxoacyl-CoA reductase [EC:1.1.1.62 1.1.1.330]
D      comp52299_c1_seq2; <a href="/dbget-bin/www_bget?ko:K10703">K10703</a>  PHS1, PAS2; very-long-chain (3R)-3-hydroxyacyl-[acyl-carrier protein] dehydratase [EC:4.2.1.134]
D      comp57353_c1_seq2; <a href="/dbget-bin/www_bget?ko:K10703">K10703</a>  PHS1, PAS2; very-long-chain (3R)-3-hydroxyacyl-[acyl-carrier protein] dehydratase [EC:4.2.1.134]
D      comp55353_c0_seq7; <a href="/dbget-bin/www_bget?ko:K10258">K10258</a>  TER, TSC13, CER10; very-long-chain enoyl-CoA reductase [EC:1.3.1.93]
D      comp56059_c1_seq12; <a href="/dbget-bin/www_bget?ko:K01068">K01068</a>  ACOT1_2_4; acyl-coenzyme A thioesterase 1/2/4 [EC:3.1.2.2]
C    00071 Fatty acid metabolism [PATH:<a href="http://www.kegg.jp/kegg-bin/show_pathway?@ko00071/K00626/K07513/K10527/K00232/K00249/K01897/K00121/K00001/K00128/K14085">ko00071</a>]
D      comp55836_c0_seq2; <a href="/dbget-bin/www_bget?ko:K00626">K00626</a>  E2.3.1.9, atoB; acetyl-CoA C-acetyltransferase [EC:2.3.1.9]
D      comp58238_c0_seq1; <a href="/dbget-bin/www_bget?ko:K00626">K00626</a>  E2.3.1.9, atoB; acetyl-CoA C-acetyltransferase [EC:2.3.1.9]
D      comp31526_c0_seq1; <a href="/dbget-bin/www_bget?ko:K07513">K07513</a>  ACAA1; acetyl-CoA acyltransferase 1 [EC:2.3.1.16]
D      comp49594_c0_seq1; <a href="/dbget-bin/www_bget?ko:K07513">K07513</a>  ACAA1; acetyl-CoA acyltransferase 1 [EC:2.3.1.16]
D      comp47764_c0_seq1; <a href="/dbget-bin/www_bget?ko:K10527">K10527</a>  MFP2; enoyl-CoA hydratase/3-hydroxyacyl-CoA dehydrogenase [EC:4.2.1.17 1.1.1.35 1.1.1.211]
D      comp57788_c0_seq5; <a href="/dbget-bin/www_bget?ko:K10527">K10527</a>  MFP2; enoyl-CoA hydratase/3-hydroxyacyl-CoA dehydrogenase [EC:4.2.1.17 1.1.1.35 1.1.1.211]
D      comp54275_c0_seq2; <a href="/dbget-bin/www_bget?ko:K00232">K00232</a>  E1.3.3.6, ACOX1, ACOX3; acyl-CoA oxidase [EC:1.3.3.6]
D      comp55792_c1_seq4; <a href="/dbget-bin/www_bget?ko:K00232">K00232</a>  E1.3.3.6, ACOX1, ACOX3; acyl-CoA oxidase [EC:1.3.3.6]
D      comp57116_c0_seq1; <a href="/dbget-bin/www_bget?ko:K00232">K00232</a>  E1.3.3.6, ACOX1, ACOX3; acyl-CoA oxidase [EC:1.3.3.6]
D      comp58580_c6_seq3; <a href="/dbget-bin/www_bget?ko:K00232">K00232</a>  E1.3.3.6, ACOX1, ACOX3; acyl-CoA oxidase [EC:1.3.3.6]
D      comp47886_c1_seq1; <a href="/dbget-bin/www_bget?ko:K00249">K00249</a>  ACADM, acd; acyl-CoA dehydrogenase [EC:1.3.8.7]
D      comp54465_c0_seq1; <a href="/dbget-bin/www_bget?ko:K01897">K01897</a>  ACSL, fadD; long-chain acyl-CoA synthetase [EC:6.2.1.3]
D      comp54935_c0_seq1; <a href="/dbget-bin/www_bget?ko:K01897">K01897</a>  ACSL, fadD; long-chain acyl-CoA synthetase [EC:6.2.1.3]
D      comp56275_c0_seq1; <a href="/dbget-bin/www_bget?ko:K01897">K01897</a>  ACSL, fadD; long-chain acyl-CoA synthetase [EC:6.2.1.3]
D      comp56862_c0_seq7; <a href="/dbget-bin/www_bget?ko:K01897">K01897</a>  ACSL, fadD; long-chain acyl-CoA synthetase [EC:6.2.1.3]
D      comp57215_c1_seq18; <a href="/dbget-bin/www_bget?ko:K01897">K01897</a>  ACSL, fadD; long-chain acyl-CoA synthetase [EC:6.2.1.3]
D      comp58560_c0_seq10; <a href="/dbget-bin/www_bget?ko:K01897">K01897</a>  ACSL, fadD; long-chain acyl-CoA synthetase [EC:6.2.1.3]
D      comp59253_c2_seq41; <a href="/dbget-bin/www_bget?ko:K01897">K01897</a>  ACSL, fadD; long-chain acyl-CoA synthetase [EC:6.2.1.3]
D      comp32193_c0_seq3; <a href="/dbget-bin/www_bget?ko:K00121">K00121</a>  frmA, ADH5, adhC; S-(hydroxymethyl)glutathione dehydrogenase / alcohol dehydrogenase [EC:1.1.1.284 1.1.1.1]
D      comp55546_c0_seq1; <a href="/dbget-bin/www_bget?ko:K00121">K00121</a>  frmA, ADH5, adhC; S-(hydroxymethyl)glutathione dehydrogenase / alcohol dehydrogenase [EC:1.1.1.284 1.1.1.1]
D      comp46391_c0_seq6; <a href="/dbget-bin/www_bget?ko:K00001">K00001</a>  E1.1.1.1, adh; alcohol dehydrogenase [EC:1.1.1.1]
D      comp47846_c0_seq1; <a href="/dbget-bin/www_bget?ko:K00001">K00001</a>  E1.1.1.1, adh; alcohol dehydrogenase [EC:1.1.1.1]
D      comp55735_c0_seq2; <a href="/dbget-bin/www_bget?ko:K00001">K00001</a>  E1.1.1.1, adh; alcohol dehydrogenase [EC:1.1.1.1]
D      comp56151_c0_seq6; <a href="/dbget-bin/www_bget?ko:K00001">K00001</a>  E1.1.1.1, adh; alcohol dehydrogenase [EC:1.1.1.1]
D      comp44038_c0_seq3; <a href="/dbget-bin/www_bget?ko:K00128">K00128</a>  E1.2.1.3; aldehyde dehydrogenase (NAD+) [EC:1.2.1.3]
D      comp44097_c0_seq4; <a href="/dbget-bin/www_bget?ko:K00128">K00128</a>  E1.2.1.3; aldehyde dehydrogenase (NAD+) [EC:1.2.1.3]
D      comp49751_c0_seq2; <a href="/dbget-bin/www_bget?ko:K00128">K00128</a>  E1.2.1.3; aldehyde dehydrogenase (NAD+) [EC:1.2.1.3]
D      comp58228_c0_seq4; <a href="/dbget-bin/www_bget?ko:K00128">K00128</a>  E1.2.1.3; aldehyde dehydrogenase (NAD+) [EC:1.2.1.3]
D      comp58879_c2_seq1; <a href="/dbget-bin/www_bget?ko:K00128">K00128</a>  E1.2.1.3; aldehyde dehydrogenase (NAD+) [EC:1.2.1.3]
D      comp59070_c0_seq1; <a href="/dbget-bin/www_bget?ko:K14085">K14085</a>  ALDH7A1; aldehyde dehydrogenase family 7 member A1 [EC:1.2.1.31 1.2.1.8 1.2.1.3]
C    00072 Synthesis and degradation of ketone bodies [PATH:<a href="http://www.kegg.jp/kegg-bin/show_pathway?@ko00072/K01641/K01640/K00626">ko00072</a>]
D      comp58537_c0_seq2; <a href="/dbget-bin/www_bget?ko:K01641">K01641</a>  E2.3.3.10; hydroxymethylglutaryl-CoA synthase [EC:2.3.3.10]
D      comp57073_c2_seq3; <a href="/dbget-bin/www_bget?ko:K01640">K01640</a>  E4.1.3.4, HMGCL, hmgL; hydroxymethylglutaryl-CoA lyase [EC:4.1.3.4]
D      comp57174_c2_seq6; <a href="/dbget-bin/www_bget?ko:K01640">K01640</a>  E4.1.3.4, HMGCL, hmgL; hydroxymethylglutaryl-CoA lyase [EC:4.1.3.4]
D      comp55836_c0_seq2; <a href="/dbget-bin/www_bget?ko:K00626">K00626</a>  E2.3.1.9, atoB; acetyl-CoA C-acetyltransferase [EC:2.3.1.9]
D      comp58238_c0_seq1; <a href="/dbget-bin/www_bget?ko:K00626">K00626</a>  E2.3.1.9, atoB; acetyl-CoA C-acetyltransferase [EC:2.3.1.9]
C    00073 Cutin, suberine and wax biosynthesis [PATH:<a href="http://www.kegg.jp/kegg-bin/show_pathway?@ko00073/K15398/K15400/K15401/K15402/K15403/K15404/K13356">ko00073</a>]
D      comp57292_c1_seq2; <a href="/dbget-bin/www_bget?ko:K15398">K15398</a>  CYP86A4S; cytochrome P450, family 86, subfamily A, polypeptide 2/4/7/8 (fatty acid omega-hydroxylase) [EC:1.14.-.-]
D      comp46467_c0_seq1; <a href="/dbget-bin/www_bget?ko:K15400">K15400</a>  HHT1; omega-hydroxypalmitate O-feruloyl transferase [EC:2.3.1.188]
D      comp49353_c0_seq2; <a href="/dbget-bin/www_bget?ko:K15401">K15401</a>  CYP86A1; cytochrome P450, family 86, subfamily A, polypeptide 1 (fatty acid omega-hydroxylase) [EC:1.14.-.-]
D      comp58352_c0_seq2; <a href="/dbget-bin/www_bget?ko:K15402">K15402</a>  CYP86B1; cytochrome P450, family 86, subfamily B, polypeptide 1 (fatty acid omega-hydroxylase) [EC:1.14.-.-]
D      comp56653_c0_seq2; <a href="/dbget-bin/www_bget?ko:K15403">K15403</a>  ACE, HTH; fatty acid omega-hydroxy dehydrogenase [EC:1.1.-.-]
D      comp58950_c0_seq1; <a href="/dbget-bin/www_bget?ko:K15404">K15404</a>  K15404, CER1; aldehyde decarbonylase [EC:4.1.99.5]
D      comp56476_c0_seq1; <a href="/dbget-bin/www_bget?ko:K13356">K13356</a>  FAR; fatty acyl-CoA reductase [EC:1.2.1.-]
D      comp59633_c0_seq3; <a href="/dbget-bin/www_bget?ko:K13356">K13356</a>  FAR; fatty acyl-CoA reductase [EC:1.2.1.-]
C    00100 Steroid biosynthesis [PATH:<a href="http://www.kegg.jp/kegg-bin/show_pathway?@ko00100/K05917/K00222/K07748/K01824/K09828/K00227/K00213/K14674/K00559/K01853/K14423/K08246/K08242/K14424/K09832">ko00100</a>]
D      comp54190_c0_seq1; <a href="/dbget-bin/www_bget?ko:K05917">K05917</a>  CYP51; cytochrome P450, family 51 (sterol 14-demethylase) [EC:1.14.13.70]
D      comp33264_c0_seq1; <a href="/dbget-bin/www_bget?ko:K00222">K00222</a>  E1.3.1.70, TM7SF2, ERG24; delta14-sterol reductase [EC:1.3.1.70]
D      comp54750_c1_seq3; <a href="/dbget-bin/www_bget?ko:K07748">K07748</a>  E1.1.1.170, NSDHL, ERG26; sterol-4alpha-carboxylate 3-dehydrogenase (decarboxylating) [EC:1.1.1.170]
D      comp49572_c0_seq1; <a href="/dbget-bin/www_bget?ko:K01824">K01824</a>  EBP; cholestenol delta-isomerase [EC:5.3.3.5]
D      comp47075_c0_seq1; <a href="/dbget-bin/www_bget?ko:K09828">K09828</a>  DHCR24; delta24-sterol reductase [EC:1.3.1.72]
D      comp50877_c0_seq1; <a href="/dbget-bin/www_bget?ko:K00227">K00227</a>  SC5DL, ERG3; lathosterol oxidase [EC:1.14.21.6]
D      comp52974_c1_seq2; <a href="/dbget-bin/www_bget?ko:K00213">K00213</a>  DHCR7; 7-dehydrocholesterol reductase [EC:1.3.1.21]
D      comp57459_c0_seq3; <a href="/dbget-bin/www_bget?ko:K14674">K14674</a>  TGL4; TAG lipase / steryl ester hydrolase / phospholipase A2 / LPA acyltransferase [EC:3.1.1.3 3.1.1.13 3.1.1.4 2.3.1.51]
D      comp54584_c0_seq2; <a href="/dbget-bin/www_bget?ko:K00559">K00559</a>  E2.1.1.41, SMT1, ERG6; sterol 24-C-methyltransferase [EC:2.1.1.41]
D      comp34365_c0_seq2; <a href="/dbget-bin/www_bget?ko:K01853">K01853</a>  E5.4.99.8; cycloartenol synthase [EC:5.4.99.8]
D      comp49191_c0_seq1; <a href="/dbget-bin/www_bget?ko:K14423">K14423</a>  SMO1; 4,4-dimethyl-9beta,19-cyclopropylsterol-4alpha-methyl oxidase [EC:1.14.13.72]
D      comp62377_c0_seq1; <a href="/dbget-bin/www_bget?ko:K08246">K08246</a>  CPI1; cycloeucalenol cycloisomerase [EC:5.5.1.9]
D      comp51541_c0_seq3; <a href="/dbget-bin/www_bget?ko:K08242">K08242</a>  E2.1.1.143; 24-methylenesterol C-methyltransferase [EC:2.1.1.143]
D      comp49759_c0_seq3; <a href="/dbget-bin/www_bget?ko:K14424">K14424</a>  SMO2; 4-alpha-methyl-delta7-sterol-4alpha-methyl oxidase [EC:1.14.13.72]
D      comp40973_c1_seq1; <a href="/dbget-bin/www_bget?ko:K09832">K09832</a>  CYP710A; cytochrome P450, family 710, subfamily A
C    00120 Primary bile acid biosynthesis [PATH:<a href="http://www.kegg.jp/kegg-bin/show_pathway?@ko00120">ko00120</a>]
C    00121 Secondary bile acid biosynthesis [PATH:<a href="http://www.kegg.jp/kegg-bin/show_pathway?@ko00121">ko00121</a>]
C    00140 Steroid hormone biosynthesis [PATH:<a href="http://www.kegg.jp/kegg-bin/show_pathway?@ko00140/K10251">ko00140</a>]
D      comp43937_c0_seq1; <a href="/dbget-bin/www_bget?ko:K10251">K10251</a>  HSD17B12, KAR, IFA38; 17beta-estradiol 17-dehydrogenase / very-long-chain 3-oxoacyl-CoA reductase [EC:1.1.1.62 1.1.1.330]
C    00561 Glycerolipid metabolism [PATH:<a href="http://www.kegg.jp/kegg-bin/show_pathway?@ko00561/K15918/K00128/K14085/K00864/K13506/K00630/K13508/K00655/K13513/K13519/K13523/K15728/K00901/K11155/K00679/K14674/K06118/K06119/K03715/K09480/K07407">ko00561</a>]
D      comp58363_c0_seq4; <a href="/dbget-bin/www_bget?ko:K15918">K15918</a>  GLYK; D-glycerate 3-kinase [EC:2.7.1.31]
D      comp44038_c0_seq3; <a href="/dbget-bin/www_bget?ko:K00128">K00128</a>  E1.2.1.3; aldehyde dehydrogenase (NAD+) [EC:1.2.1.3]
D      comp44097_c0_seq4; <a href="/dbget-bin/www_bget?ko:K00128">K00128</a>  E1.2.1.3; aldehyde dehydrogenase (NAD+) [EC:1.2.1.3]
D      comp49751_c0_seq2; <a href="/dbget-bin/www_bget?ko:K00128">K00128</a>  E1.2.1.3; aldehyde dehydrogenase (NAD+) [EC:1.2.1.3]
D      comp58228_c0_seq4; <a href="/dbget-bin/www_bget?ko:K00128">K00128</a>  E1.2.1.3; aldehyde dehydrogenase (NAD+) [EC:1.2.1.3]
D      comp58879_c2_seq1; <a href="/dbget-bin/www_bget?ko:K00128">K00128</a>  E1.2.1.3; aldehyde dehydrogenase (NAD+) [EC:1.2.1.3]
D      comp59070_c0_seq1; <a href="/dbget-bin/www_bget?ko:K14085">K14085</a>  ALDH7A1; aldehyde dehydrogenase family 7 member A1 [EC:1.2.1.31 1.2.1.8 1.2.1.3]
D      comp47870_c0_seq1; <a href="/dbget-bin/www_bget?ko:K00864">K00864</a>  E2.7.1.30, glpK; glycerol kinase [EC:2.7.1.30]
D      comp55439_c0_seq2; <a href="/dbget-bin/www_bget?ko:K13506">K13506</a>  GPAT3_4, AGPAT9, AGPAT6; glycerol-3-phosphate O-acyltransferase 3/4 [EC:2.3.1.15]
D      comp50896_c1_seq8; <a href="/dbget-bin/www_bget?ko:K00630">K00630</a>  ATS1; glycerol-3-phosphate O-acyltransferase [EC:2.3.1.15]
D      comp41111_c0_seq1; <a href="/dbget-bin/www_bget?ko:K13508">K13508</a>  GPAT; glycerol-3-phosphate acyltransferase [EC:2.3.1.15]
D      comp45105_c0_seq1; <a href="/dbget-bin/www_bget?ko:K13508">K13508</a>  GPAT; glycerol-3-phosphate acyltransferase [EC:2.3.1.15]
D      comp55457_c0_seq1; <a href="/dbget-bin/www_bget?ko:K13508">K13508</a>  GPAT; glycerol-3-phosphate acyltransferase [EC:2.3.1.15]
D      comp55547_c0_seq2; <a href="/dbget-bin/www_bget?ko:K13508">K13508</a>  GPAT; glycerol-3-phosphate acyltransferase [EC:2.3.1.15]
D      comp55725_c2_seq4; <a href="/dbget-bin/www_bget?ko:K00655">K00655</a>  plsC; 1-acyl-sn-glycerol-3-phosphate acyltransferase [EC:2.3.1.51]
D      comp45858_c0_seq1; <a href="/dbget-bin/www_bget?ko:K13513">K13513</a>  LCLAT1, AGPAT8; lysocardiolipin and lysophospholipid acyltransferase [EC:2.3.1.- 2.3.1.51]
D      comp58192_c1_seq1; <a href="/dbget-bin/www_bget?ko:K13513">K13513</a>  LCLAT1, AGPAT8; lysocardiolipin and lysophospholipid acyltransferase [EC:2.3.1.- 2.3.1.51]
D      comp54751_c0_seq2; <a href="/dbget-bin/www_bget?ko:K13519">K13519</a>  LPT1, ALE1; lysophospholipid acyltransferase [EC:2.3.1.51 2.3.1.23 2.3.1.-]
D      comp34392_c0_seq1; <a href="/dbget-bin/www_bget?ko:K13523">K13523</a>  AGPAT3_4; lysophosphatidic acid acyltransferase / lysophosphatidylinositol acyltransferase [EC:2.3.1.51 2.3.1.-]
D      comp55787_c0_seq1; <a href="/dbget-bin/www_bget?ko:K13523">K13523</a>  AGPAT3_4; lysophosphatidic acid acyltransferase / lysophosphatidylinositol acyltransferase [EC:2.3.1.51 2.3.1.-]
D      comp57105_c0_seq3; <a href="/dbget-bin/www_bget?ko:K15728">K15728</a>  LPIN; phosphatidate phosphatase LPIN [EC:3.1.3.4]
D      comp58400_c0_seq2; <a href="/dbget-bin/www_bget?ko:K15728">K15728</a>  LPIN; phosphatidate phosphatase LPIN [EC:3.1.3.4]
D      comp53034_c0_seq1; <a href="/dbget-bin/www_bget?ko:K00901">K00901</a>  E2.7.1.107, DGK, dgkA; diacylglycerol kinase (ATP dependent) [EC:2.7.1.107]
D      comp59113_c0_seq1; <a href="/dbget-bin/www_bget?ko:K00901">K00901</a>  E2.7.1.107, DGK, dgkA; diacylglycerol kinase (ATP dependent) [EC:2.7.1.107]
D      comp55308_c0_seq7; <a href="/dbget-bin/www_bget?ko:K11155">K11155</a>  DGAT1; diacylglycerol O-acyltransferase 1 [EC:2.3.1.20 2.3.1.75 2.3.1.76]
D      comp56071_c1_seq6; <a href="/dbget-bin/www_bget?ko:K00679">K00679</a>  E2.3.1.158; phospholipid:diacylglycerol acyltransferase [EC:2.3.1.158]
D      comp57186_c0_seq1; <a href="/dbget-bin/www_bget?ko:K00679">K00679</a>  E2.3.1.158; phospholipid:diacylglycerol acyltransferase [EC:2.3.1.158]
D      comp57459_c0_seq3; <a href="/dbget-bin/www_bget?ko:K14674">K14674</a>  TGL4; TAG lipase / steryl ester hydrolase / phospholipase A2 / LPA acyltransferase [EC:3.1.1.3 3.1.1.13 3.1.1.4 2.3.1.51]
D      comp53486_c0_seq1; <a href="/dbget-bin/www_bget?ko:K06118">K06118</a>  E3.13.1.1, sqd1, sqdb; UDP-sulfoquinovose synthase [EC:3.13.1.1]
D      comp58036_c0_seq1; <a href="/dbget-bin/www_bget?ko:K06119">K06119</a>  SQD2; sulfoquinovosyltransferase [EC:2.4.1.-]
D      comp55819_c0_seq2; <a href="/dbget-bin/www_bget?ko:K03715">K03715</a>  E2.4.1.46; 1,2-diacylglycerol 3-beta-galactosyltransferase [EC:2.4.1.46]
D      comp56492_c0_seq3; <a href="/dbget-bin/www_bget?ko:K03715">K03715</a>  E2.4.1.46; 1,2-diacylglycerol 3-beta-galactosyltransferase [EC:2.4.1.46]
D      comp55024_c0_seq1; <a href="/dbget-bin/www_bget?ko:K09480">K09480</a>  E2.4.1.241; digalactosyldiacylglycerol synthase [EC:2.4.1.241]
D      comp58216_c3_seq2; <a href="/dbget-bin/www_bget?ko:K09480">K09480</a>  E2.4.1.241; digalactosyldiacylglycerol synthase [EC:2.4.1.241]
D      comp43091_c0_seq2; <a href="/dbget-bin/www_bget?ko:K07407">K07407</a>  E3.2.1.22B, galA, rafA; alpha-galactosidase [EC:3.2.1.22]
D      comp54803_c0_seq1; <a href="/dbget-bin/www_bget?ko:K07407">K07407</a>  E3.2.1.22B, galA, rafA; alpha-galactosidase [EC:3.2.1.22]
D      comp56212_c2_seq1; <a href="/dbget-bin/www_bget?ko:K07407">K07407</a>  E3.2.1.22B, galA, rafA; alpha-galactosidase [EC:3.2.1.22]
C    00564 Glycerophospholipid metabolism [PATH:<a href="http://www.kegg.jp/kegg-bin/show_pathway?@ko00564/K00006/K00111/K13506/K00630/K13508/K13513/K13519/K13523/K00655/K15728/K00901/K01114/K01115/K16860/K01047/K14674/K13510/K16818/K06130/K01126/K14156/K00968/K00993/K00894/K00967/K05929/K00550/K00981/K08730/K01613/K00995/K08744/K13511/K00999">ko00564</a>]
D      comp56643_c0_seq10; <a href="/dbget-bin/www_bget?ko:K00006">K00006</a>  GPD1; glycerol-3-phosphate dehydrogenase (NAD+) [EC:1.1.1.8]
D      comp56667_c0_seq1; <a href="/dbget-bin/www_bget?ko:K00111">K00111</a>  glpA, glpD; glycerol-3-phosphate dehydrogenase [EC:1.1.5.3]
D      comp55439_c0_seq2; <a href="/dbget-bin/www_bget?ko:K13506">K13506</a>  GPAT3_4, AGPAT9, AGPAT6; glycerol-3-phosphate O-acyltransferase 3/4 [EC:2.3.1.15]
D      comp50896_c1_seq8; <a href="/dbget-bin/www_bget?ko:K00630">K00630</a>  ATS1; glycerol-3-phosphate O-acyltransferase [EC:2.3.1.15]
D      comp41111_c0_seq1; <a href="/dbget-bin/www_bget?ko:K13508">K13508</a>  GPAT; glycerol-3-phosphate acyltransferase [EC:2.3.1.15]
D      comp45105_c0_seq1; <a href="/dbget-bin/www_bget?ko:K13508">K13508</a>  GPAT; glycerol-3-phosphate acyltransferase [EC:2.3.1.15]
D      comp55457_c0_seq1; <a href="/dbget-bin/www_bget?ko:K13508">K13508</a>  GPAT; glycerol-3-phosphate acyltransferase [EC:2.3.1.15]
D      comp55547_c0_seq2; <a href="/dbget-bin/www_bget?ko:K13508">K13508</a>  GPAT; glycerol-3-phosphate acyltransferase [EC:2.3.1.15]
D      comp45858_c0_seq1; <a href="/dbget-bin/www_bget?ko:K13513">K13513</a>  LCLAT1, AGPAT8; lysocardiolipin and lysophospholipid acyltransferase [EC:2.3.1.- 2.3.1.51]
D      comp58192_c1_seq1; <a href="/dbget-bin/www_bget?ko:K13513">K13513</a>  LCLAT1, AGPAT8; lysocardiolipin and lysophospholipid acyltransferase [EC:2.3.1.- 2.3.1.51]
D      comp54751_c0_seq2; <a href="/dbget-bin/www_bget?ko:K13519">K13519</a>  LPT1, ALE1; lysophospholipid acyltransferase [EC:2.3.1.51 2.3.1.23 2.3.1.-]
D      comp34392_c0_seq1; <a href="/dbget-bin/www_bget?ko:K13523">K13523</a>  AGPAT3_4; lysophosphatidic acid acyltransferase / lysophosphatidylinositol acyltransferase [EC:2.3.1.51 2.3.1.-]
D      comp55787_c0_seq1; <a href="/dbget-bin/www_bget?ko:K13523">K13523</a>  AGPAT3_4; lysophosphatidic acid acyltransferase / lysophosphatidylinositol acyltransferase [EC:2.3.1.51 2.3.1.-]
D      comp55725_c2_seq4; <a href="/dbget-bin/www_bget?ko:K00655">K00655</a>  plsC; 1-acyl-sn-glycerol-3-phosphate acyltransferase [EC:2.3.1.51]
D      comp57105_c0_seq3; <a href="/dbget-bin/www_bget?ko:K15728">K15728</a>  LPIN; phosphatidate phosphatase LPIN [EC:3.1.3.4]
D      comp58400_c0_seq2; <a href="/dbget-bin/www_bget?ko:K15728">K15728</a>  LPIN; phosphatidate phosphatase LPIN [EC:3.1.3.4]
D      comp53034_c0_seq1; <a href="/dbget-bin/www_bget?ko:K00901">K00901</a>  E2.7.1.107, DGK, dgkA; diacylglycerol kinase (ATP dependent) [EC:2.7.1.107]
D      comp59113_c0_seq1; <a href="/dbget-bin/www_bget?ko:K00901">K00901</a>  E2.7.1.107, DGK, dgkA; diacylglycerol kinase (ATP dependent) [EC:2.7.1.107]
D      comp52911_c0_seq1; <a href="/dbget-bin/www_bget?ko:K01114">K01114</a>  plcC; phospholipase C [EC:3.1.4.3]
D      comp53616_c0_seq2; <a href="/dbget-bin/www_bget?ko:K01114">K01114</a>  plcC; phospholipase C [EC:3.1.4.3]
D      comp178814_c0_seq1; <a href="/dbget-bin/www_bget?ko:K01114">K01114</a>  plcC; phospholipase C [EC:3.1.4.3]
D      comp54877_c0_seq2; <a href="/dbget-bin/www_bget?ko:K01115">K01115</a>  PLD1_2; phospholipase D1/2 [EC:3.1.4.4]
D      comp55269_c0_seq1; <a href="/dbget-bin/www_bget?ko:K01115">K01115</a>  PLD1_2; phospholipase D1/2 [EC:3.1.4.4]
D      comp57239_c1_seq1; <a href="/dbget-bin/www_bget?ko:K01115">K01115</a>  PLD1_2; phospholipase D1/2 [EC:3.1.4.4]
D      comp59028_c1_seq4; <a href="/dbget-bin/www_bget?ko:K01115">K01115</a>  PLD1_2; phospholipase D1/2 [EC:3.1.4.4]
D      comp59554_c0_seq2; <a href="/dbget-bin/www_bget?ko:K01115">K01115</a>  PLD1_2; phospholipase D1/2 [EC:3.1.4.4]
D      comp59875_c1_seq8; <a href="/dbget-bin/www_bget?ko:K01115">K01115</a>  PLD1_2; phospholipase D1/2 [EC:3.1.4.4]
D      comp57113_c0_seq1; <a href="/dbget-bin/www_bget?ko:K16860">K16860</a>  PLD3_4; phospholipase D3/4 [EC:3.1.4.4]
D      comp43086_c0_seq1; <a href="/dbget-bin/www_bget?ko:K01047">K01047</a>  PLA2G, SPLA2; secretory phospholipase A2 [EC:3.1.1.4]
D      comp57459_c0_seq3; <a href="/dbget-bin/www_bget?ko:K14674">K14674</a>  TGL4; TAG lipase / steryl ester hydrolase / phospholipase A2 / LPA acyltransferase [EC:3.1.1.3 3.1.1.13 3.1.1.4 2.3.1.51]
D      comp56729_c0_seq15; <a href="/dbget-bin/www_bget?ko:K13510">K13510</a>  LPCAT1_2; lysophosphatidylcholine acyltransferase / lyso-PAF acetyltransferase [EC:2.3.1.23 2.3.1.67]
D      comp58949_c0_seq10; <a href="/dbget-bin/www_bget?ko:K13510">K13510</a>  LPCAT1_2; lysophosphatidylcholine acyltransferase / lyso-PAF acetyltransferase [EC:2.3.1.23 2.3.1.67]
D      comp45691_c0_seq1; <a href="/dbget-bin/www_bget?ko:K16818">K16818</a>  K16818, DAD1; phospholipase A1 [EC:3.1.1.32]
D      comp40800_c0_seq1; <a href="/dbget-bin/www_bget?ko:K06130">K06130</a>  LYPLA2; lysophospholipase II [EC:3.1.1.5]
D      comp53001_c0_seq1; <a href="/dbget-bin/www_bget?ko:K06130">K06130</a>  LYPLA2; lysophospholipase II [EC:3.1.1.5]
D      comp50216_c0_seq1; <a href="/dbget-bin/www_bget?ko:K01126">K01126</a>  E3.1.4.46, glpQ, ugpQ; glycerophosphoryl diester phosphodiesterase [EC:3.1.4.46]
D      comp54381_c0_seq2; <a href="/dbget-bin/www_bget?ko:K14156">K14156</a>  CHK; choline/ethanolamine kinase [EC:2.7.1.32 2.7.1.82]
D      comp53687_c0_seq1; <a href="/dbget-bin/www_bget?ko:K00968">K00968</a>  PCYT1; choline-phosphate cytidylyltransferase [EC:2.7.7.15]
D      comp55428_c0_seq1; <a href="/dbget-bin/www_bget?ko:K00968">K00968</a>  PCYT1; choline-phosphate cytidylyltransferase [EC:2.7.7.15]
D      comp57844_c0_seq2; <a href="/dbget-bin/www_bget?ko:K00993">K00993</a>  EPT1; ethanolaminephosphotransferase [EC:2.7.8.1]
D      comp53287_c0_seq4; <a href="/dbget-bin/www_bget?ko:K00894">K00894</a>  ETNK, EKI; ethanolamine kinase [EC:2.7.1.82]
D      comp57318_c0_seq1; <a href="/dbget-bin/www_bget?ko:K00967">K00967</a>  PCYT2; ethanolamine-phosphate cytidylyltransferase [EC:2.7.7.14]
D      comp64192_c0_seq1; <a href="/dbget-bin/www_bget?ko:K00967">K00967</a>  PCYT2; ethanolamine-phosphate cytidylyltransferase [EC:2.7.7.14]
D      comp58289_c0_seq1; <a href="/dbget-bin/www_bget?ko:K05929">K05929</a>  E2.1.1.103, NMT; phosphoethanolamine N-methyltransferase [EC:2.1.1.103]
D      comp49406_c0_seq1; <a href="/dbget-bin/www_bget?ko:K00550">K00550</a>  OPI3; methylene-fatty-acyl-phospholipid synthase [EC:2.1.1.16]
D      comp55366_c0_seq2; <a href="/dbget-bin/www_bget?ko:K00981">K00981</a>  E2.7.7.41, CDS1, CDS2, cdsA; phosphatidate cytidylyltransferase [EC:2.7.7.41]
D      comp58266_c0_seq10; <a href="/dbget-bin/www_bget?ko:K08730">K08730</a>  PTDSS2; phosphatidylserine synthase 2 [EC:2.7.8.29]
D      comp47730_c0_seq1; <a href="/dbget-bin/www_bget?ko:K01613">K01613</a>  psd, PISD; phosphatidylserine decarboxylase [EC:4.1.1.65]
D      comp56130_c2_seq9; <a href="/dbget-bin/www_bget?ko:K01613">K01613</a>  psd, PISD; phosphatidylserine decarboxylase [EC:4.1.1.65]
D      comp56256_c2_seq3; <a href="/dbget-bin/www_bget?ko:K00995">K00995</a>  E2.7.8.5, pgsA, PGS1; CDP-diacylglycerol--glycerol-3-phosphate 3-phosphatidyltransferase [EC:2.7.8.5]
D      comp57937_c0_seq23; <a href="/dbget-bin/www_bget?ko:K08744">K08744</a>  CRLS; cardiolipin synthase [EC:2.7.8.-]
D      comp59929_c0_seq2; <a href="/dbget-bin/www_bget?ko:K13511">K13511</a>  TAZ; monolysocardiolipin acyltransferase [EC:2.3.1.-]
D      comp57400_c1_seq4; <a href="/dbget-bin/www_bget?ko:K00999">K00999</a>  CDIPT; CDP-diacylglycerol--inositol 3-phosphatidyltransferase [EC:2.7.8.11]
C    00565 Ether lipid metabolism [PATH:<a href="http://www.kegg.jp/kegg-bin/show_pathway?@ko00565/K00993/K01047/K14674/K01114/K01115/K16860/K13510/K13519">ko00565</a>]
D      comp57844_c0_seq2; <a href="/dbget-bin/www_bget?ko:K00993">K00993</a>  EPT1; ethanolaminephosphotransferase [EC:2.7.8.1]
D      comp43086_c0_seq1; <a href="/dbget-bin/www_bget?ko:K01047">K01047</a>  PLA2G, SPLA2; secretory phospholipase A2 [EC:3.1.1.4]
D      comp57459_c0_seq3; <a href="/dbget-bin/www_bget?ko:K14674">K14674</a>  TGL4; TAG lipase / steryl ester hydrolase / phospholipase A2 / LPA acyltransferase [EC:3.1.1.3 3.1.1.13 3.1.1.4 2.3.1.51]
D      comp52911_c0_seq1; <a href="/dbget-bin/www_bget?ko:K01114">K01114</a>  plcC; phospholipase C [EC:3.1.4.3]
D      comp53616_c0_seq2; <a href="/dbget-bin/www_bget?ko:K01114">K01114</a>  plcC; phospholipase C [EC:3.1.4.3]
D      comp178814_c0_seq1; <a href="/dbget-bin/www_bget?ko:K01114">K01114</a>  plcC; phospholipase C [EC:3.1.4.3]
D      comp54877_c0_seq2; <a href="/dbget-bin/www_bget?ko:K01115">K01115</a>  PLD1_2; phospholipase D1/2 [EC:3.1.4.4]
D      comp55269_c0_seq1; <a href="/dbget-bin/www_bget?ko:K01115">K01115</a>  PLD1_2; phospholipase D1/2 [EC:3.1.4.4]
D      comp57239_c1_seq1; <a href="/dbget-bin/www_bget?ko:K01115">K01115</a>  PLD1_2; phospholipase D1/2 [EC:3.1.4.4]
D      comp59028_c1_seq4; <a href="/dbget-bin/www_bget?ko:K01115">K01115</a>  PLD1_2; phospholipase D1/2 [EC:3.1.4.4]
D      comp59554_c0_seq2; <a href="/dbget-bin/www_bget?ko:K01115">K01115</a>  PLD1_2; phospholipase D1/2 [EC:3.1.4.4]
D      comp59875_c1_seq8; <a href="/dbget-bin/www_bget?ko:K01115">K01115</a>  PLD1_2; phospholipase D1/2 [EC:3.1.4.4]
D      comp57113_c0_seq1; <a href="/dbget-bin/www_bget?ko:K16860">K16860</a>  PLD3_4; phospholipase D3/4 [EC:3.1.4.4]
D      comp56729_c0_seq15; <a href="/dbget-bin/www_bget?ko:K13510">K13510</a>  LPCAT1_2; lysophosphatidylcholine acyltransferase / lyso-PAF acetyltransferase [EC:2.3.1.23 2.3.1.67]
D      comp58949_c0_seq10; <a href="/dbget-bin/www_bget?ko:K13510">K13510</a>  LPCAT1_2; lysophosphatidylcholine acyltransferase / lyso-PAF acetyltransferase [EC:2.3.1.23 2.3.1.67]
D      comp54751_c0_seq2; <a href="/dbget-bin/www_bget?ko:K13519">K13519</a>  LPT1, ALE1; lysophospholipid acyltransferase [EC:2.3.1.51 2.3.1.23 2.3.1.-]
C    00600 Sphingolipid metabolism [PATH:<a href="http://www.kegg.jp/kegg-bin/show_pathway?@ko00600/K00654/K04708/K12349/K04711/K04712/K04713/K04715/K01634/K17108/K01190/K12309/K07407">ko00600</a>]
D      comp56196_c0_seq1; <a href="/dbget-bin/www_bget?ko:K00654">K00654</a>  E2.3.1.50; serine palmitoyltransferase [EC:2.3.1.50]
D      comp56561_c0_seq4; <a href="/dbget-bin/www_bget?ko:K00654">K00654</a>  E2.3.1.50; serine palmitoyltransferase [EC:2.3.1.50]
D      comp56280_c0_seq4; <a href="/dbget-bin/www_bget?ko:K04708">K04708</a>  E1.1.1.102; 3-dehydrosphinganine reductase [EC:1.1.1.102]
D      comp57293_c0_seq4; <a href="/dbget-bin/www_bget?ko:K12349">K12349</a>  ASAH2; neutral ceramidase [EC:3.5.1.23]
D      comp56999_c0_seq8; <a href="/dbget-bin/www_bget?ko:K04711">K04711</a>  YDC1; dihydroceramidase [EC:3.5.1.-]
D      comp49054_c0_seq1; <a href="/dbget-bin/www_bget?ko:K04712">K04712</a>  DEGS; sphingolipid delta-4 desaturase [EC:1.14.-.-]
D      comp46735_c0_seq2; <a href="/dbget-bin/www_bget?ko:K04713">K04713</a>  SUR2; sphinganine C4-monooxygenase [EC:1.14.13.169]
D      comp53598_c0_seq6; <a href="/dbget-bin/www_bget?ko:K04713">K04713</a>  SUR2; sphinganine C4-monooxygenase [EC:1.14.13.169]
D      comp49464_c0_seq1; <a href="/dbget-bin/www_bget?ko:K04715">K04715</a>  E2.7.1.138, CERK; ceramide kinase [EC:2.7.1.138]
D      comp60139_c2_seq10; <a href="/dbget-bin/www_bget?ko:K01634">K01634</a>  E4.1.2.27; sphinganine-1-phosphate aldolase [EC:4.1.2.27]
D      comp51899_c0_seq4; <a href="/dbget-bin/www_bget?ko:K17108">K17108</a>  GBA2; non-lysosomal glucosylceramidase [EC:3.2.1.45]
D      comp55500_c0_seq9; <a href="/dbget-bin/www_bget?ko:K17108">K17108</a>  GBA2; non-lysosomal glucosylceramidase [EC:3.2.1.45]
D      comp58177_c0_seq1; <a href="/dbget-bin/www_bget?ko:K01190">K01190</a>  lacZ; beta-galactosidase [EC:3.2.1.23]
D      comp47567_c0_seq1; <a href="/dbget-bin/www_bget?ko:K12309">K12309</a>  GLB1, ELNR1; beta-galactosidase [EC:3.2.1.23]
D      comp43091_c0_seq2; <a href="/dbget-bin/www_bget?ko:K07407">K07407</a>  E3.2.1.22B, galA, rafA; alpha-galactosidase [EC:3.2.1.22]
D      comp54803_c0_seq1; <a href="/dbget-bin/www_bget?ko:K07407">K07407</a>  E3.2.1.22B, galA, rafA; alpha-galactosidase [EC:3.2.1.22]
D      comp56212_c2_seq1; <a href="/dbget-bin/www_bget?ko:K07407">K07407</a>  E3.2.1.22B, galA, rafA; alpha-galactosidase [EC:3.2.1.22]
C    00590 Arachidonic acid metabolism [PATH:<a href="http://www.kegg.jp/kegg-bin/show_pathway?@ko00590/K01047/K14674/K00432/K00681/K01254/K05309">ko00590</a>]
D      comp43086_c0_seq1; <a href="/dbget-bin/www_bget?ko:K01047">K01047</a>  PLA2G, SPLA2; secretory phospholipase A2 [EC:3.1.1.4]
D      comp57459_c0_seq3; <a href="/dbget-bin/www_bget?ko:K14674">K14674</a>  TGL4; TAG lipase / steryl ester hydrolase / phospholipase A2 / LPA acyltransferase [EC:3.1.1.3 3.1.1.13 3.1.1.4 2.3.1.51]
D      comp46529_c0_seq1; <a href="/dbget-bin/www_bget?ko:K00432">K00432</a>  E1.11.1.9; glutathione peroxidase [EC:1.11.1.9]
D      comp47915_c0_seq1; <a href="/dbget-bin/www_bget?ko:K00432">K00432</a>  E1.11.1.9; glutathione peroxidase [EC:1.11.1.9]
D      comp47977_c0_seq1; <a href="/dbget-bin/www_bget?ko:K00432">K00432</a>  E1.11.1.9; glutathione peroxidase [EC:1.11.1.9]
D      comp50121_c0_seq1; <a href="/dbget-bin/www_bget?ko:K00432">K00432</a>  E1.11.1.9; glutathione peroxidase [EC:1.11.1.9]
D      comp55386_c0_seq34; <a href="/dbget-bin/www_bget?ko:K00432">K00432</a>  E1.11.1.9; glutathione peroxidase [EC:1.11.1.9]
D      comp52867_c1_seq4; <a href="/dbget-bin/www_bget?ko:K00681">K00681</a>  ggt; gamma-glutamyltranspeptidase [EC:2.3.2.2]
D      comp46450_c0_seq1; <a href="/dbget-bin/www_bget?ko:K01254">K01254</a>  E3.3.2.6, LTA4H; leukotriene-A4 hydrolase [EC:3.3.2.6]
D      comp46799_c0_seq1; <a href="/dbget-bin/www_bget?ko:K05309">K05309</a>  PTGES2; microsomal prostaglandin-E synthase 2 [EC:5.3.99.3]
D      comp52871_c0_seq1; <a href="/dbget-bin/www_bget?ko:K05309">K05309</a>  PTGES2; microsomal prostaglandin-E synthase 2 [EC:5.3.99.3]
C    00591 Linoleic acid metabolism [PATH:<a href="http://www.kegg.jp/kegg-bin/show_pathway?@ko00591/K01047/K14674/K15718/K00454">ko00591</a>]
D      comp43086_c0_seq1; <a href="/dbget-bin/www_bget?ko:K01047">K01047</a>  PLA2G, SPLA2; secretory phospholipase A2 [EC:3.1.1.4]
D      comp57459_c0_seq3; <a href="/dbget-bin/www_bget?ko:K14674">K14674</a>  TGL4; TAG lipase / steryl ester hydrolase / phospholipase A2 / LPA acyltransferase [EC:3.1.1.3 3.1.1.13 3.1.1.4 2.3.1.51]
D      comp52921_c0_seq29; <a href="/dbget-bin/www_bget?ko:K15718">K15718</a>  LOX1_5; linoleate 9S-lipoxygenase [EC:1.13.11.58]
D      comp49298_c0_seq1; <a href="/dbget-bin/www_bget?ko:K00454">K00454</a>  LOX2S; lipoxygenase [EC:1.13.11.12]
D      comp53859_c0_seq1; <a href="/dbget-bin/www_bget?ko:K00454">K00454</a>  LOX2S; lipoxygenase [EC:1.13.11.12]
D      comp55917_c0_seq8; <a href="/dbget-bin/www_bget?ko:K00454">K00454</a>  LOX2S; lipoxygenase [EC:1.13.11.12]
D      comp59542_c1_seq1; <a href="/dbget-bin/www_bget?ko:K00454">K00454</a>  LOX2S; lipoxygenase [EC:1.13.11.12]
C    00592 alpha-Linolenic acid metabolism [PATH:<a href="http://www.kegg.jp/kegg-bin/show_pathway?@ko00592/K01047/K14674/K16818/K00454/K01723/K10525/K05894/K10526/K00232/K10527/K07513/K08241/K10528/K10529">ko00592</a>]
D      comp43086_c0_seq1; <a href="/dbget-bin/www_bget?ko:K01047">K01047</a>  PLA2G, SPLA2; secretory phospholipase A2 [EC:3.1.1.4]
D      comp57459_c0_seq3; <a href="/dbget-bin/www_bget?ko:K14674">K14674</a>  TGL4; TAG lipase / steryl ester hydrolase / phospholipase A2 / LPA acyltransferase [EC:3.1.1.3 3.1.1.13 3.1.1.4 2.3.1.51]
D      comp45691_c0_seq1; <a href="/dbget-bin/www_bget?ko:K16818">K16818</a>  K16818, DAD1; phospholipase A1 [EC:3.1.1.32]
D      comp49298_c0_seq1; <a href="/dbget-bin/www_bget?ko:K00454">K00454</a>  LOX2S; lipoxygenase [EC:1.13.11.12]
D      comp53859_c0_seq1; <a href="/dbget-bin/www_bget?ko:K00454">K00454</a>  LOX2S; lipoxygenase [EC:1.13.11.12]
D      comp55917_c0_seq8; <a href="/dbget-bin/www_bget?ko:K00454">K00454</a>  LOX2S; lipoxygenase [EC:1.13.11.12]
D      comp59542_c1_seq1; <a href="/dbget-bin/www_bget?ko:K00454">K00454</a>  LOX2S; lipoxygenase [EC:1.13.11.12]
D      comp52531_c0_seq6; <a href="/dbget-bin/www_bget?ko:K01723">K01723</a>  AOS; hydroperoxide dehydratase [EC:4.2.1.92]
D      comp47714_c0_seq2; <a href="/dbget-bin/www_bget?ko:K10525">K10525</a>  E5.3.99.6, aoc; allene oxide cyclase [EC:5.3.99.6]
D      comp55365_c2_seq4; <a href="/dbget-bin/www_bget?ko:K05894">K05894</a>  E1.3.1.42; 12-oxophytodienoic acid reductase [EC:1.3.1.42]
D      comp57959_c0_seq1; <a href="/dbget-bin/www_bget?ko:K05894">K05894</a>  E1.3.1.42; 12-oxophytodienoic acid reductase [EC:1.3.1.42]
D      comp50949_c0_seq1; <a href="/dbget-bin/www_bget?ko:K10526">K10526</a>  OPCL1; OPC-8:0 CoA ligase 1 [EC:6.2.1.-]
D      comp54275_c0_seq2; <a href="/dbget-bin/www_bget?ko:K00232">K00232</a>  E1.3.3.6, ACOX1, ACOX3; acyl-CoA oxidase [EC:1.3.3.6]
D      comp55792_c1_seq4; <a href="/dbget-bin/www_bget?ko:K00232">K00232</a>  E1.3.3.6, ACOX1, ACOX3; acyl-CoA oxidase [EC:1.3.3.6]
D      comp57116_c0_seq1; <a href="/dbget-bin/www_bget?ko:K00232">K00232</a>  E1.3.3.6, ACOX1, ACOX3; acyl-CoA oxidase [EC:1.3.3.6]
D      comp58580_c6_seq3; <a href="/dbget-bin/www_bget?ko:K00232">K00232</a>  E1.3.3.6, ACOX1, ACOX3; acyl-CoA oxidase [EC:1.3.3.6]
D      comp47764_c0_seq1; <a href="/dbget-bin/www_bget?ko:K10527">K10527</a>  MFP2; enoyl-CoA hydratase/3-hydroxyacyl-CoA dehydrogenase [EC:4.2.1.17 1.1.1.35 1.1.1.211]
D      comp57788_c0_seq5; <a href="/dbget-bin/www_bget?ko:K10527">K10527</a>  MFP2; enoyl-CoA hydratase/3-hydroxyacyl-CoA dehydrogenase [EC:4.2.1.17 1.1.1.35 1.1.1.211]
D      comp31526_c0_seq1; <a href="/dbget-bin/www_bget?ko:K07513">K07513</a>  ACAA1; acetyl-CoA acyltransferase 1 [EC:2.3.1.16]
D      comp49594_c0_seq1; <a href="/dbget-bin/www_bget?ko:K07513">K07513</a>  ACAA1; acetyl-CoA acyltransferase 1 [EC:2.3.1.16]
D      comp27448_c0_seq1; <a href="/dbget-bin/www_bget?ko:K08241">K08241</a>  E2.1.1.141; jasmonate O-methyltransferase [EC:2.1.1.141]
D      comp51765_c0_seq1; <a href="/dbget-bin/www_bget?ko:K10528">K10528</a>  HPL; hydroperoxide lyase [EC:4.1.2.-]
D      comp52792_c0_seq1; <a href="/dbget-bin/www_bget?ko:K10529">K10529</a>  DOX1; alpha-dioxygenase [EC:1.-.-.-]
C    01040 Biosynthesis of unsaturated fatty acids [PATH:<a href="http://www.kegg.jp/kegg-bin/show_pathway?@ko01040/K10251/K10703/K10258/K00059/K03921/K10255/K10256/K10257/K00232/K07513/K01068">ko01040</a>]
D      comp43937_c0_seq1; <a href="/dbget-bin/www_bget?ko:K10251">K10251</a>  HSD17B12, KAR, IFA38; 17beta-estradiol 17-dehydrogenase / very-long-chain 3-oxoacyl-CoA reductase [EC:1.1.1.62 1.1.1.330]
D      comp52299_c1_seq2; <a href="/dbget-bin/www_bget?ko:K10703">K10703</a>  PHS1, PAS2; very-long-chain (3R)-3-hydroxyacyl-[acyl-carrier protein] dehydratase [EC:4.2.1.134]
D      comp57353_c1_seq2; <a href="/dbget-bin/www_bget?ko:K10703">K10703</a>  PHS1, PAS2; very-long-chain (3R)-3-hydroxyacyl-[acyl-carrier protein] dehydratase [EC:4.2.1.134]
D      comp55353_c0_seq7; <a href="/dbget-bin/www_bget?ko:K10258">K10258</a>  TER, TSC13, CER10; very-long-chain enoyl-CoA reductase [EC:1.3.1.93]
D      comp53141_c0_seq2; <a href="/dbget-bin/www_bget?ko:K00059">K00059</a>  fabG; 3-oxoacyl-[acyl-carrier protein] reductase [EC:1.1.1.100]
D      comp61361_c0_seq1; <a href="/dbget-bin/www_bget?ko:K00059">K00059</a>  fabG; 3-oxoacyl-[acyl-carrier protein] reductase [EC:1.1.1.100]
D      comp33295_c0_seq1; <a href="/dbget-bin/www_bget?ko:K03921">K03921</a>  DESA1; acyl-[acyl-carrier-protein] desaturase [EC:1.14.19.2]
D      comp47754_c0_seq1; <a href="/dbget-bin/www_bget?ko:K03921">K03921</a>  DESA1; acyl-[acyl-carrier-protein] desaturase [EC:1.14.19.2]
D      comp54929_c0_seq1; <a href="/dbget-bin/www_bget?ko:K10255">K10255</a>  FAD6, desA; omega-6 fatty acid desaturase (delta-12 desaturase) [EC:1.14.19.-]
D      comp50720_c0_seq2; <a href="/dbget-bin/www_bget?ko:K10256">K10256</a>  FAD2; omega-6 fatty acid desaturase (delta-12 desaturase) [EC:1.14.19.-]
D      comp54052_c0_seq2; <a href="/dbget-bin/www_bget?ko:K10257">K10257</a>  FAD8, desB; omega-3 fatty acid desaturase (delta-15 desaturase) [EC:1.14.19.-]
D      comp54903_c0_seq2; <a href="/dbget-bin/www_bget?ko:K10257">K10257</a>  FAD8, desB; omega-3 fatty acid desaturase (delta-15 desaturase) [EC:1.14.19.-]
D      comp54275_c0_seq2; <a href="/dbget-bin/www_bget?ko:K00232">K00232</a>  E1.3.3.6, ACOX1, ACOX3; acyl-CoA oxidase [EC:1.3.3.6]
D      comp55792_c1_seq4; <a href="/dbget-bin/www_bget?ko:K00232">K00232</a>  E1.3.3.6, ACOX1, ACOX3; acyl-CoA oxidase [EC:1.3.3.6]
D      comp57116_c0_seq1; <a href="/dbget-bin/www_bget?ko:K00232">K00232</a>  E1.3.3.6, ACOX1, ACOX3; acyl-CoA oxidase [EC:1.3.3.6]
D      comp58580_c6_seq3; <a href="/dbget-bin/www_bget?ko:K00232">K00232</a>  E1.3.3.6, ACOX1, ACOX3; acyl-CoA oxidase [EC:1.3.3.6]
D      comp31526_c0_seq1; <a href="/dbget-bin/www_bget?ko:K07513">K07513</a>  ACAA1; acetyl-CoA acyltransferase 1 [EC:2.3.1.16]
D      comp49594_c0_seq1; <a href="/dbget-bin/www_bget?ko:K07513">K07513</a>  ACAA1; acetyl-CoA acyltransferase 1 [EC:2.3.1.16]
D      comp56059_c1_seq12; <a href="/dbget-bin/www_bget?ko:K01068">K01068</a>  ACOT1_2_4; acyl-coenzyme A thioesterase 1/2/4 [EC:3.1.2.2]
C    01004 Lipid biosynthesis proteins [BR:ko01004]
B
B  <b>Nucleotide metabolism</b>
C    00230 Purine metabolism [PATH:<a href="http://www.kegg.jp/kegg-bin/show_pathway?@ko00230/K01835/K00948/K00764/K01945/K00601/K01952/K01933/K11808/K01923/K01756/K00602/K00759/K01081/K03787/K00760/K00088/K00940/K01510/K14641/K01519/K00106/K01951/K00942/K00873/K10807/K10808/K03040/K03043/K03046/K02999/K03002/K03000/K03005/K03006/K03010/K03011/K03012/K03013/K03014/K03015/K03016/K03017/K03007/K03008/K03009/K03018/K03021/K03023/K03026/K14721/K03027/K03019/K03020/K03022/K03024/K03025/K02335/K02320/K02321/K02684/K02685/K02327/K02328/K03504/K03505/K02325/K02326/K01939/K01490/K00856/K01488/K00939/K06928/K00962/K01522/K13811/K00860/K00365/K13484/K01466/K02083/K14977/K01427">ko00230</a>]
D      comp42135_c0_seq1; <a href="/dbget-bin/www_bget?ko:K01835">K01835</a>  pgm; phosphoglucomutase [EC:5.4.2.2]
D      comp51508_c0_seq1; <a href="/dbget-bin/www_bget?ko:K01835">K01835</a>  pgm; phosphoglucomutase [EC:5.4.2.2]
D      comp48339_c0_seq2; <a href="/dbget-bin/www_bget?ko:K00948">K00948</a>  PRPS, prsA; ribose-phosphate pyrophosphokinase [EC:2.7.6.1]
D      comp55902_c0_seq2; <a href="/dbget-bin/www_bget?ko:K00764">K00764</a>  purF, PPAT; amidophosphoribosyltransferase [EC:2.4.2.14]
D      comp51199_c0_seq2; <a href="/dbget-bin/www_bget?ko:K01945">K01945</a>  purD; phosphoribosylamine--glycine ligase [EC:6.3.4.13]
D      comp55291_c0_seq16; <a href="/dbget-bin/www_bget?ko:K00601">K00601</a>  E2.1.2.2; phosphoribosylglycinamide formyltransferase [EC:2.1.2.2]
D      comp54310_c0_seq2; <a href="/dbget-bin/www_bget?ko:K01952">K01952</a>  purL, PFAS; phosphoribosylformylglycinamidine synthase [EC:6.3.5.3]
D      comp46510_c0_seq1; <a href="/dbget-bin/www_bget?ko:K01933">K01933</a>  purM; phosphoribosylformylglycinamidine cyclo-ligase [EC:6.3.3.1]
D      comp58805_c1_seq2; <a href="/dbget-bin/www_bget?ko:K11808">K11808</a>  ADE2; phosphoribosylaminoimidazole carboxylase [EC:4.1.1.21]
D      comp44769_c0_seq1; <a href="/dbget-bin/www_bget?ko:K01923">K01923</a>  purC; phosphoribosylaminoimidazole-succinocarboxamide synthase [EC:6.3.2.6]
D      comp51709_c0_seq1; <a href="/dbget-bin/www_bget?ko:K01756">K01756</a>  purB, ADSL; adenylosuccinate lyase [EC:4.3.2.2]
D      comp58509_c0_seq1; <a href="/dbget-bin/www_bget?ko:K00602">K00602</a>  purH; phosphoribosylaminoimidazolecarboxamide formyltransferase / IMP cyclohydrolase [EC:2.1.2.3 3.5.4.10]
D      comp51087_c0_seq1; <a href="/dbget-bin/www_bget?ko:K00759">K00759</a>  E2.4.2.7, apt; adenine phosphoribosyltransferase [EC:2.4.2.7]
D      comp54054_c0_seq3; <a href="/dbget-bin/www_bget?ko:K00759">K00759</a>  E2.4.2.7, apt; adenine phosphoribosyltransferase [EC:2.4.2.7]
D      comp52495_c0_seq1; <a href="/dbget-bin/www_bget?ko:K01081">K01081</a>  E3.1.3.5; 5'-nucleotidase [EC:3.1.3.5]
D      comp52744_c0_seq1; <a href="/dbget-bin/www_bget?ko:K03787">K03787</a>  surE; 5'-nucleotidase [EC:3.1.3.5]
D      comp53433_c3_seq10; <a href="/dbget-bin/www_bget?ko:K03787">K03787</a>  surE; 5'-nucleotidase [EC:3.1.3.5]
D      comp50986_c0_seq2; <a href="/dbget-bin/www_bget?ko:K00760">K00760</a>  hprT, hpt, HPRT1; hypoxanthine phosphoribosyltransferase [EC:2.4.2.8]
D      comp54457_c0_seq3; <a href="/dbget-bin/www_bget?ko:K00088">K00088</a>  guaB; IMP dehydrogenase [EC:1.1.1.205]
D      comp46015_c0_seq1; <a href="/dbget-bin/www_bget?ko:K00940">K00940</a>  E2.7.4.6, ndk; nucleoside-diphosphate kinase [EC:2.7.4.6]
D      comp49578_c0_seq1; <a href="/dbget-bin/www_bget?ko:K00940">K00940</a>  E2.7.4.6, ndk; nucleoside-diphosphate kinase [EC:2.7.4.6]
D      comp52812_c0_seq2; <a href="/dbget-bin/www_bget?ko:K00940">K00940</a>  E2.7.4.6, ndk; nucleoside-diphosphate kinase [EC:2.7.4.6]
D      comp55966_c0_seq4; <a href="/dbget-bin/www_bget?ko:K01510">K01510</a>  ENTPD1_3_8; apyrase [EC:3.6.1.5]
D      comp47735_c1_seq1; <a href="/dbget-bin/www_bget?ko:K14641">K14641</a>  APY1_2; apyrase [EC:3.6.1.5]
D      comp55990_c2_seq15; <a href="/dbget-bin/www_bget?ko:K14641">K14641</a>  APY1_2; apyrase [EC:3.6.1.5]
D      comp56245_c0_seq1; <a href="/dbget-bin/www_bget?ko:K14641">K14641</a>  APY1_2; apyrase [EC:3.6.1.5]
D      comp46515_c0_seq2; <a href="/dbget-bin/www_bget?ko:K01519">K01519</a>  ITPA; inosine triphosphate pyrophosphatase [EC:3.6.1.19]
D      comp50536_c0_seq3; <a href="/dbget-bin/www_bget?ko:K00106">K00106</a>  XDH; xanthine dehydrogenase/oxidase [EC:1.17.1.4 1.17.3.2]
D      comp50171_c0_seq1; <a href="/dbget-bin/www_bget?ko:K01951">K01951</a>  E6.3.5.2, guaA; GMP synthase (glutamine-hydrolysing) [EC:6.3.5.2]
D      comp52851_c1_seq1; <a href="/dbget-bin/www_bget?ko:K00942">K00942</a>  E2.7.4.8, gmk; guanylate kinase [EC:2.7.4.8]
D      comp59058_c0_seq5; <a href="/dbget-bin/www_bget?ko:K00942">K00942</a>  E2.7.4.8, gmk; guanylate kinase [EC:2.7.4.8]
D      comp15324_c1_seq1; <a href="/dbget-bin/www_bget?ko:K00873">K00873</a>  PK, pyk; pyruvate kinase [EC:2.7.1.40]
D      comp52264_c0_seq1; <a href="/dbget-bin/www_bget?ko:K00873">K00873</a>  PK, pyk; pyruvate kinase [EC:2.7.1.40]
D      comp55674_c1_seq3; <a href="/dbget-bin/www_bget?ko:K00873">K00873</a>  PK, pyk; pyruvate kinase [EC:2.7.1.40]
D      comp57064_c1_seq13; <a href="/dbget-bin/www_bget?ko:K00873">K00873</a>  PK, pyk; pyruvate kinase [EC:2.7.1.40]
D      comp59067_c0_seq12; <a href="/dbget-bin/www_bget?ko:K00873">K00873</a>  PK, pyk; pyruvate kinase [EC:2.7.1.40]
D      comp59134_c0_seq14; <a href="/dbget-bin/www_bget?ko:K00873">K00873</a>  PK, pyk; pyruvate kinase [EC:2.7.1.40]
D      comp59529_c0_seq4; <a href="/dbget-bin/www_bget?ko:K00873">K00873</a>  PK, pyk; pyruvate kinase [EC:2.7.1.40]
D      comp58919_c0_seq1; <a href="/dbget-bin/www_bget?ko:K10807">K10807</a>  RRM1; ribonucleoside-diphosphate reductase subunit M1 [EC:1.17.4.1]
D      comp34112_c0_seq1; <a href="/dbget-bin/www_bget?ko:K10808">K10808</a>  RRM2; ribonucleoside-diphosphate reductase subunit M2 [EC:1.17.4.1]
D      comp45191_c0_seq2; <a href="/dbget-bin/www_bget?ko:K03040">K03040</a>  rpoA; DNA-directed RNA polymerase subunit alpha [EC:2.7.7.6]
D      comp41984_c1_seq1; <a href="/dbget-bin/www_bget?ko:K03043">K03043</a>  rpoB; DNA-directed RNA polymerase subunit beta [EC:2.7.7.6]
D      comp59489_c3_seq1; <a href="/dbget-bin/www_bget?ko:K03046">K03046</a>  rpoC; DNA-directed RNA polymerase subunit beta' [EC:2.7.7.6]
D      comp58531_c3_seq24; <a href="/dbget-bin/www_bget?ko:K02999">K02999</a>  RPA1, POLR1A; DNA-directed RNA polymerase I subunit RPA1 [EC:2.7.7.6]
D      comp55704_c1_seq4; <a href="/dbget-bin/www_bget?ko:K03002">K03002</a>  RPA2, POLR1B; DNA-directed RNA polymerase I subunit RPA2 [EC:2.7.7.6]
D      comp51052_c0_seq1; <a href="/dbget-bin/www_bget?ko:K03000">K03000</a>  RPA12, ZNRD1; DNA-directed RNA polymerase I subunit RPA12
D      comp58093_c0_seq1; <a href="/dbget-bin/www_bget?ko:K03005">K03005</a>  RPA49, POLR1E; DNA-directed RNA polymerase I subunit RPA49
D      comp54644_c0_seq1; <a href="/dbget-bin/www_bget?ko:K03006">K03006</a>  RPB1, POLR2A; DNA-directed RNA polymerase II subunit RPB1 [EC:2.7.7.6]
D      comp54325_c0_seq1; <a href="/dbget-bin/www_bget?ko:K03010">K03010</a>  RPB2, POLR2B; DNA-directed RNA polymerase II subunit RPB2 [EC:2.7.7.6]
D      comp31659_c0_seq1; <a href="/dbget-bin/www_bget?ko:K03011">K03011</a>  RPB3, POLR2C; DNA-directed RNA polymerase II subunit RPB3
D      comp30235_c0_seq1; <a href="/dbget-bin/www_bget?ko:K03012">K03012</a>  RPB4, POLR2D; DNA-directed RNA polymerase II subunit RPB4
D      comp49519_c0_seq1; <a href="/dbget-bin/www_bget?ko:K03012">K03012</a>  RPB4, POLR2D; DNA-directed RNA polymerase II subunit RPB4
D      comp30887_c0_seq1; <a href="/dbget-bin/www_bget?ko:K03013">K03013</a>  RPB5, POLR2E; DNA-directed RNA polymerases I, II, and III subunit RPABC1
D      comp47010_c0_seq1; <a href="/dbget-bin/www_bget?ko:K03013">K03013</a>  RPB5, POLR2E; DNA-directed RNA polymerases I, II, and III subunit RPABC1
D      comp49328_c0_seq2; <a href="/dbget-bin/www_bget?ko:K03013">K03013</a>  RPB5, POLR2E; DNA-directed RNA polymerases I, II, and III subunit RPABC1
D      comp56070_c0_seq14; <a href="/dbget-bin/www_bget?ko:K03014">K03014</a>  RPB6, POLR2F; DNA-directed RNA polymerases I, II, and III subunit RPABC2
D      comp48216_c0_seq1; <a href="/dbget-bin/www_bget?ko:K03015">K03015</a>  RPB7, POLR2G; DNA-directed RNA polymerase II subunit RPB7
D      comp42186_c0_seq1; <a href="/dbget-bin/www_bget?ko:K03016">K03016</a>  RPB8, POLR2H; DNA-directed RNA polymerases I, II, and III subunit RPABC3
D      comp34072_c0_seq1; <a href="/dbget-bin/www_bget?ko:K03017">K03017</a>  RPB9, POLR2I; DNA-directed RNA polymerase II subunit RPB9
D      comp46711_c0_seq3; <a href="/dbget-bin/www_bget?ko:K03007">K03007</a>  RPB10, POLR2L; DNA-directed RNA polymerases I, II, and III subunit RPABC5
D      comp44225_c0_seq2; <a href="/dbget-bin/www_bget?ko:K03008">K03008</a>  RPB11, POLR2J; DNA-directed RNA polymerase II subunit RPB11
D      comp54211_c1_seq1; <a href="/dbget-bin/www_bget?ko:K03009">K03009</a>  RPB12, POLR2K; DNA-directed RNA polymerases I, II, and III subunit RPABC4
D      comp56834_c0_seq5; <a href="/dbget-bin/www_bget?ko:K03018">K03018</a>  RPC1, POLR3A; DNA-directed RNA polymerase III subunit RPC1 [EC:2.7.7.6]
D      comp54352_c0_seq2; <a href="/dbget-bin/www_bget?ko:K03021">K03021</a>  RPC2, POLR3B; DNA-directed RNA polymerase III subunit RPC2 [EC:2.7.7.6]
D      comp50529_c1_seq2; <a href="/dbget-bin/www_bget?ko:K03023">K03023</a>  RPC82, POLR3C; DNA-directed RNA polymerase III subunit RPC3
D      comp43709_c1_seq1; <a href="/dbget-bin/www_bget?ko:K03026">K03026</a>  RPC53, POLR3D; DNA-directed RNA polymerase III subunit RPC4
D      comp54622_c0_seq2; <a href="/dbget-bin/www_bget?ko:K03026">K03026</a>  RPC53, POLR3D; DNA-directed RNA polymerase III subunit RPC4
D      comp50507_c0_seq2; <a href="/dbget-bin/www_bget?ko:K14721">K14721</a>  RPC37, POLR3E; DNA-directed RNA polymerase III subunit RPC5
D      comp51424_c0_seq6; <a href="/dbget-bin/www_bget?ko:K03027">K03027</a>  RPC40, POLR1C; DNA-directed RNA polymerases I and III subunit RPAC1
D      comp40081_c0_seq2; <a href="/dbget-bin/www_bget?ko:K03019">K03019</a>  RPC11, POLR3K; DNA-directed RNA polymerase III subunit RPC10
D      comp52481_c1_seq11; <a href="/dbget-bin/www_bget?ko:K03020">K03020</a>  RPC19, POLR1D; DNA-directed RNA polymerases I and III subunit RPAC2
D      comp56687_c0_seq19; <a href="/dbget-bin/www_bget?ko:K03022">K03022</a>  RPC25, POLR3H; DNA-directed RNA polymerase III subunit RPC8
D      comp53886_c0_seq7; <a href="/dbget-bin/www_bget?ko:K03024">K03024</a>  RPC31, POLR3G; DNA-directed RNA polymerase III subunit RPC7
D      comp50680_c0_seq1; <a href="/dbget-bin/www_bget?ko:K03025">K03025</a>  RPC34, POLR3F; DNA-directed RNA polymerase III subunit RPC6
D      comp59876_c0_seq2; <a href="/dbget-bin/www_bget?ko:K02335">K02335</a>  DPO1, polA; DNA polymerase I [EC:2.7.7.7]
D      comp55046_c0_seq1; <a href="/dbget-bin/www_bget?ko:K02320">K02320</a>  POLA1; DNA polymerase alpha subunit A [EC:2.7.7.7]
D      comp45384_c0_seq1; <a href="/dbget-bin/www_bget?ko:K02321">K02321</a>  POLA2; DNA polymerase alpha subunit B
D      comp52963_c0_seq5; <a href="/dbget-bin/www_bget?ko:K02684">K02684</a>  PRI1; DNA primase small subunit [EC:2.7.7.-]
D      comp49890_c0_seq1; <a href="/dbget-bin/www_bget?ko:K02685">K02685</a>  PRI2; DNA primase large subunit [EC:2.7.7.-]
D      comp50212_c0_seq1; <a href="/dbget-bin/www_bget?ko:K02327">K02327</a>  POLD1; DNA polymerase delta subunit 1 [EC:2.7.7.7]
D      comp55338_c1_seq2; <a href="/dbget-bin/www_bget?ko:K02328">K02328</a>  POLD2; DNA polymerase delta subunit 2
D      comp57230_c0_seq1; <a href="/dbget-bin/www_bget?ko:K03504">K03504</a>  POLD3; DNA polymerase delta subunit 3
D      comp46108_c0_seq1; <a href="/dbget-bin/www_bget?ko:K03505">K03505</a>  POLD4; DNA polymerase delta subunit 4
D      comp49492_c0_seq3; <a href="/dbget-bin/www_bget?ko:K02325">K02325</a>  POLE2; DNA polymerase epsilon subunit 2 [EC:2.7.7.7]
D      comp27912_c0_seq1; <a href="/dbget-bin/www_bget?ko:K02326">K02326</a>  POLE3; DNA polymerase epsilon subunit 3 [EC:2.7.7.7]
D      comp50130_c0_seq2; <a href="/dbget-bin/www_bget?ko:K01939">K01939</a>  E6.3.4.4, purA; adenylosuccinate synthase [EC:6.3.4.4]
D      comp59646_c0_seq7; <a href="/dbget-bin/www_bget?ko:K01490">K01490</a>  E3.5.4.6, AMPD; AMP deaminase [EC:3.5.4.6]
D      comp55571_c0_seq1; <a href="/dbget-bin/www_bget?ko:K00856">K00856</a>  E2.7.1.20, ADK; adenosine kinase [EC:2.7.1.20]
D      comp59489_c2_seq2; <a href="/dbget-bin/www_bget?ko:K01488">K01488</a>  E3.5.4.4, ADA, add; adenosine deaminase [EC:3.5.4.4]
D      comp50461_c0_seq14; <a href="/dbget-bin/www_bget?ko:K00939">K00939</a>  E2.7.4.3, adk; adenylate kinase [EC:2.7.4.3]
D      comp53567_c0_seq2; <a href="/dbget-bin/www_bget?ko:K00939">K00939</a>  E2.7.4.3, adk; adenylate kinase [EC:2.7.4.3]
D      comp56494_c0_seq6; <a href="/dbget-bin/www_bget?ko:K00939">K00939</a>  E2.7.4.3, adk; adenylate kinase [EC:2.7.4.3]
D      comp59078_c2_seq10; <a href="/dbget-bin/www_bget?ko:K00939">K00939</a>  E2.7.4.3, adk; adenylate kinase [EC:2.7.4.3]
D      comp56863_c1_seq1; <a href="/dbget-bin/www_bget?ko:K06928">K06928</a>  K06928; nucleoside-triphosphatase THEP1 [EC:3.6.1.15]
D      comp55682_c0_seq1; <a href="/dbget-bin/www_bget?ko:K00962">K00962</a>  pnp, PNPT1; polyribonucleotide nucleotidyltransferase [EC:2.7.7.8]
D      comp58531_c0_seq6; <a href="/dbget-bin/www_bget?ko:K00962">K00962</a>  pnp, PNPT1; polyribonucleotide nucleotidyltransferase [EC:2.7.7.8]
D      comp54685_c1_seq3; <a href="/dbget-bin/www_bget?ko:K01522">K01522</a>  FHIT; bis(5'-adenosyl)-triphosphatase [EC:3.6.1.29]
D      comp52621_c0_seq3; <a href="/dbget-bin/www_bget?ko:K13811">K13811</a>  PAPSS; 3'-phosphoadenosine 5'-phosphosulfate synthase [EC:2.7.7.4 2.7.1.25]
D      comp58171_c1_seq1; <a href="/dbget-bin/www_bget?ko:K13811">K13811</a>  PAPSS; 3'-phosphoadenosine 5'-phosphosulfate synthase [EC:2.7.7.4 2.7.1.25]
D      comp41842_c0_seq2; <a href="/dbget-bin/www_bget?ko:K00860">K00860</a>  cysC; adenylylsulfate kinase [EC:2.7.1.25]
D      comp54385_c0_seq22; <a href="/dbget-bin/www_bget?ko:K00860">K00860</a>  cysC; adenylylsulfate kinase [EC:2.7.1.25]
D      comp57440_c4_seq2; <a href="/dbget-bin/www_bget?ko:K00365">K00365</a>  E1.7.3.3; urate oxidase [EC:1.7.3.3]
D      comp49224_c0_seq2; <a href="/dbget-bin/www_bget?ko:K13484">K13484</a>  TTHL; 5-hydroxyisourate hydrolase / 2-oxo-4-hydroxy-4-carboxy-5-ureidoimidazoline decarboxylase [EC:3.5.2.17 4.1.1.-]
D      comp52910_c0_seq2; <a href="/dbget-bin/www_bget?ko:K01466">K01466</a>  allB; allantoinase [EC:3.5.2.5]
D      comp46516_c1_seq4; <a href="/dbget-bin/www_bget?ko:K02083">K02083</a>  allC; allantoate deiminase [EC:3.5.3.9]
D      comp52378_c2_seq19; <a href="/dbget-bin/www_bget?ko:K14977">K14977</a>  ylbA; ureidoglycine aminohydrolase [EC:3.5.3.-]
D      comp47701_c0_seq2; <a href="/dbget-bin/www_bget?ko:K01427">K01427</a>  URE; urease [EC:3.5.1.5]
C    00240 Pyrimidine metabolism [PATH:<a href="http://www.kegg.jp/kegg-bin/show_pathway?@ko00240/K01955/K01956/K00609/K01465/K00254/K13421/K13800/K09903/K00940/K00962/K01510/K14641/K01519/K01937/K03040/K03043/K03046/K02999/K03002/K03000/K03005/K03006/K03010/K03011/K03012/K03013/K03014/K03015/K03016/K03017/K03007/K03008/K03009/K03018/K03021/K03023/K03026/K14721/K03027/K03019/K03020/K03022/K03024/K03025/K02335/K02320/K02321/K02684/K02685/K02327/K02328/K03504/K03505/K02325/K02326/K00876/K01081/K03787/K01240/K00761/K00207/K01464/K01431/K00384/K10807/K10808/K01520/K13998/K01489/K01493/K00857/K00943/K16329">ko00240</a>]
D      comp51248_c0_seq4; <a href="/dbget-bin/www_bget?ko:K01955">K01955</a>  carB, CPA2; carbamoyl-phosphate synthase large subunit [EC:6.3.5.5]
D      comp59636_c1_seq3; <a href="/dbget-bin/www_bget?ko:K01956">K01956</a>  carA, CPA1; carbamoyl-phosphate synthase small subunit [EC:6.3.5.5]
D      comp47649_c0_seq1; <a href="/dbget-bin/www_bget?ko:K00609">K00609</a>  pyrB, PYR2; aspartate carbamoyltransferase catalytic subunit [EC:2.1.3.2]
D      comp59352_c0_seq8; <a href="/dbget-bin/www_bget?ko:K01465">K01465</a>  URA4, pyrC; dihydroorotase [EC:3.5.2.3]
D      comp54077_c0_seq10; <a href="/dbget-bin/www_bget?ko:K00254">K00254</a>  DHODH; dihydroorotate dehydrogenase [EC:1.3.5.2]
D      comp57258_c0_seq4; <a href="/dbget-bin/www_bget?ko:K13421">K13421</a>  UMPS; uridine monophosphate synthetase [EC:2.4.2.10 4.1.1.23]
D      comp48198_c0_seq2; <a href="/dbget-bin/www_bget?ko:K13800">K13800</a>  CMPK1, UMPK; UMP-CMP kinase [EC:2.7.4.- 2.7.4.14]
D      comp53338_c0_seq2; <a href="/dbget-bin/www_bget?ko:K09903">K09903</a>  pyrH; uridylate kinase [EC:2.7.4.22]
D      comp46015_c0_seq1; <a href="/dbget-bin/www_bget?ko:K00940">K00940</a>  E2.7.4.6, ndk; nucleoside-diphosphate kinase [EC:2.7.4.6]
D      comp49578_c0_seq1; <a href="/dbget-bin/www_bget?ko:K00940">K00940</a>  E2.7.4.6, ndk; nucleoside-diphosphate kinase [EC:2.7.4.6]
D      comp52812_c0_seq2; <a href="/dbget-bin/www_bget?ko:K00940">K00940</a>  E2.7.4.6, ndk; nucleoside-diphosphate kinase [EC:2.7.4.6]
D      comp55682_c0_seq1; <a href="/dbget-bin/www_bget?ko:K00962">K00962</a>  pnp, PNPT1; polyribonucleotide nucleotidyltransferase [EC:2.7.7.8]
D      comp58531_c0_seq6; <a href="/dbget-bin/www_bget?ko:K00962">K00962</a>  pnp, PNPT1; polyribonucleotide nucleotidyltransferase [EC:2.7.7.8]
D      comp55966_c0_seq4; <a href="/dbget-bin/www_bget?ko:K01510">K01510</a>  ENTPD1_3_8; apyrase [EC:3.6.1.5]
D      comp47735_c1_seq1; <a href="/dbget-bin/www_bget?ko:K14641">K14641</a>  APY1_2; apyrase [EC:3.6.1.5]
D      comp55990_c2_seq15; <a href="/dbget-bin/www_bget?ko:K14641">K14641</a>  APY1_2; apyrase [EC:3.6.1.5]
D      comp56245_c0_seq1; <a href="/dbget-bin/www_bget?ko:K14641">K14641</a>  APY1_2; apyrase [EC:3.6.1.5]
D      comp46515_c0_seq2; <a href="/dbget-bin/www_bget?ko:K01519">K01519</a>  ITPA; inosine triphosphate pyrophosphatase [EC:3.6.1.19]
D      comp51077_c0_seq17; <a href="/dbget-bin/www_bget?ko:K01937">K01937</a>  E6.3.4.2, pyrG; CTP synthase [EC:6.3.4.2]
D      comp55807_c0_seq2; <a href="/dbget-bin/www_bget?ko:K01937">K01937</a>  E6.3.4.2, pyrG; CTP synthase [EC:6.3.4.2]
D      comp45191_c0_seq2; <a href="/dbget-bin/www_bget?ko:K03040">K03040</a>  rpoA; DNA-directed RNA polymerase subunit alpha [EC:2.7.7.6]
D      comp41984_c1_seq1; <a href="/dbget-bin/www_bget?ko:K03043">K03043</a>  rpoB; DNA-directed RNA polymerase subunit beta [EC:2.7.7.6]
D      comp59489_c3_seq1; <a href="/dbget-bin/www_bget?ko:K03046">K03046</a>  rpoC; DNA-directed RNA polymerase subunit beta' [EC:2.7.7.6]
D      comp58531_c3_seq24; <a href="/dbget-bin/www_bget?ko:K02999">K02999</a>  RPA1, POLR1A; DNA-directed RNA polymerase I subunit RPA1 [EC:2.7.7.6]
D      comp55704_c1_seq4; <a href="/dbget-bin/www_bget?ko:K03002">K03002</a>  RPA2, POLR1B; DNA-directed RNA polymerase I subunit RPA2 [EC:2.7.7.6]
D      comp51052_c0_seq1; <a href="/dbget-bin/www_bget?ko:K03000">K03000</a>  RPA12, ZNRD1; DNA-directed RNA polymerase I subunit RPA12
D      comp58093_c0_seq1; <a href="/dbget-bin/www_bget?ko:K03005">K03005</a>  RPA49, POLR1E; DNA-directed RNA polymerase I subunit RPA49
D      comp54644_c0_seq1; <a href="/dbget-bin/www_bget?ko:K03006">K03006</a>  RPB1, POLR2A; DNA-directed RNA polymerase II subunit RPB1 [EC:2.7.7.6]
D      comp54325_c0_seq1; <a href="/dbget-bin/www_bget?ko:K03010">K03010</a>  RPB2, POLR2B; DNA-directed RNA polymerase II subunit RPB2 [EC:2.7.7.6]
D      comp31659_c0_seq1; <a href="/dbget-bin/www_bget?ko:K03011">K03011</a>  RPB3, POLR2C; DNA-directed RNA polymerase II subunit RPB3
D      comp30235_c0_seq1; <a href="/dbget-bin/www_bget?ko:K03012">K03012</a>  RPB4, POLR2D; DNA-directed RNA polymerase II subunit RPB4
D      comp49519_c0_seq1; <a href="/dbget-bin/www_bget?ko:K03012">K03012</a>  RPB4, POLR2D; DNA-directed RNA polymerase II subunit RPB4
D      comp30887_c0_seq1; <a href="/dbget-bin/www_bget?ko:K03013">K03013</a>  RPB5, POLR2E; DNA-directed RNA polymerases I, II, and III subunit RPABC1
D      comp47010_c0_seq1; <a href="/dbget-bin/www_bget?ko:K03013">K03013</a>  RPB5, POLR2E; DNA-directed RNA polymerases I, II, and III subunit RPABC1
D      comp49328_c0_seq2; <a href="/dbget-bin/www_bget?ko:K03013">K03013</a>  RPB5, POLR2E; DNA-directed RNA polymerases I, II, and III subunit RPABC1
D      comp56070_c0_seq14; <a href="/dbget-bin/www_bget?ko:K03014">K03014</a>  RPB6, POLR2F; DNA-directed RNA polymerases I, II, and III subunit RPABC2
D      comp48216_c0_seq1; <a href="/dbget-bin/www_bget?ko:K03015">K03015</a>  RPB7, POLR2G; DNA-directed RNA polymerase II subunit RPB7
D      comp42186_c0_seq1; <a href="/dbget-bin/www_bget?ko:K03016">K03016</a>  RPB8, POLR2H; DNA-directed RNA polymerases I, II, and III subunit RPABC3
D      comp34072_c0_seq1; <a href="/dbget-bin/www_bget?ko:K03017">K03017</a>  RPB9, POLR2I; DNA-directed RNA polymerase II subunit RPB9
D      comp46711_c0_seq3; <a href="/dbget-bin/www_bget?ko:K03007">K03007</a>  RPB10, POLR2L; DNA-directed RNA polymerases I, II, and III subunit RPABC5
D      comp44225_c0_seq2; <a href="/dbget-bin/www_bget?ko:K03008">K03008</a>  RPB11, POLR2J; DNA-directed RNA polymerase II subunit RPB11
D      comp54211_c1_seq1; <a href="/dbget-bin/www_bget?ko:K03009">K03009</a>  RPB12, POLR2K; DNA-directed RNA polymerases I, II, and III subunit RPABC4
D      comp56834_c0_seq5; <a href="/dbget-bin/www_bget?ko:K03018">K03018</a>  RPC1, POLR3A; DNA-directed RNA polymerase III subunit RPC1 [EC:2.7.7.6]
D      comp54352_c0_seq2; <a href="/dbget-bin/www_bget?ko:K03021">K03021</a>  RPC2, POLR3B; DNA-directed RNA polymerase III subunit RPC2 [EC:2.7.7.6]
D      comp50529_c1_seq2; <a href="/dbget-bin/www_bget?ko:K03023">K03023</a>  RPC82, POLR3C; DNA-directed RNA polymerase III subunit RPC3
D      comp43709_c1_seq1; <a href="/dbget-bin/www_bget?ko:K03026">K03026</a>  RPC53, POLR3D; DNA-directed RNA polymerase III subunit RPC4
D      comp54622_c0_seq2; <a href="/dbget-bin/www_bget?ko:K03026">K03026</a>  RPC53, POLR3D; DNA-directed RNA polymerase III subunit RPC4
D      comp50507_c0_seq2; <a href="/dbget-bin/www_bget?ko:K14721">K14721</a>  RPC37, POLR3E; DNA-directed RNA polymerase III subunit RPC5
D      comp51424_c0_seq6; <a href="/dbget-bin/www_bget?ko:K03027">K03027</a>  RPC40, POLR1C; DNA-directed RNA polymerases I and III subunit RPAC1
D      comp40081_c0_seq2; <a href="/dbget-bin/www_bget?ko:K03019">K03019</a>  RPC11, POLR3K; DNA-directed RNA polymerase III subunit RPC10
D      comp52481_c1_seq11; <a href="/dbget-bin/www_bget?ko:K03020">K03020</a>  RPC19, POLR1D; DNA-directed RNA polymerases I and III subunit RPAC2
D      comp56687_c0_seq19; <a href="/dbget-bin/www_bget?ko:K03022">K03022</a>  RPC25, POLR3H; DNA-directed RNA polymerase III subunit RPC8
D      comp53886_c0_seq7; <a href="/dbget-bin/www_bget?ko:K03024">K03024</a>  RPC31, POLR3G; DNA-directed RNA polymerase III subunit RPC7
D      comp50680_c0_seq1; <a href="/dbget-bin/www_bget?ko:K03025">K03025</a>  RPC34, POLR3F; DNA-directed RNA polymerase III subunit RPC6
D      comp59876_c0_seq2; <a href="/dbget-bin/www_bget?ko:K02335">K02335</a>  DPO1, polA; DNA polymerase I [EC:2.7.7.7]
D      comp55046_c0_seq1; <a href="/dbget-bin/www_bget?ko:K02320">K02320</a>  POLA1; DNA polymerase alpha subunit A [EC:2.7.7.7]
D      comp45384_c0_seq1; <a href="/dbget-bin/www_bget?ko:K02321">K02321</a>  POLA2; DNA polymerase alpha subunit B
D      comp52963_c0_seq5; <a href="/dbget-bin/www_bget?ko:K02684">K02684</a>  PRI1; DNA primase small subunit [EC:2.7.7.-]
D      comp49890_c0_seq1; <a href="/dbget-bin/www_bget?ko:K02685">K02685</a>  PRI2; DNA primase large subunit [EC:2.7.7.-]
D      comp50212_c0_seq1; <a href="/dbget-bin/www_bget?ko:K02327">K02327</a>  POLD1; DNA polymerase delta subunit 1 [EC:2.7.7.7]
D      comp55338_c1_seq2; <a href="/dbget-bin/www_bget?ko:K02328">K02328</a>  POLD2; DNA polymerase delta subunit 2
D      comp57230_c0_seq1; <a href="/dbget-bin/www_bget?ko:K03504">K03504</a>  POLD3; DNA polymerase delta subunit 3
D      comp46108_c0_seq1; <a href="/dbget-bin/www_bget?ko:K03505">K03505</a>  POLD4; DNA polymerase delta subunit 4
D      comp49492_c0_seq3; <a href="/dbget-bin/www_bget?ko:K02325">K02325</a>  POLE2; DNA polymerase epsilon subunit 2 [EC:2.7.7.7]
D      comp27912_c0_seq1; <a href="/dbget-bin/www_bget?ko:K02326">K02326</a>  POLE3; DNA polymerase epsilon subunit 3 [EC:2.7.7.7]
D      comp51557_c0_seq3; <a href="/dbget-bin/www_bget?ko:K00876">K00876</a>  E2.7.1.48, udk; uridine kinase [EC:2.7.1.48]
D      comp59679_c1_seq90; <a href="/dbget-bin/www_bget?ko:K00876">K00876</a>  E2.7.1.48, udk; uridine kinase [EC:2.7.1.48]
D      comp52495_c0_seq1; <a href="/dbget-bin/www_bget?ko:K01081">K01081</a>  E3.1.3.5; 5'-nucleotidase [EC:3.1.3.5]
D      comp52744_c0_seq1; <a href="/dbget-bin/www_bget?ko:K03787">K03787</a>  surE; 5'-nucleotidase [EC:3.1.3.5]
D      comp53433_c3_seq10; <a href="/dbget-bin/www_bget?ko:K03787">K03787</a>  surE; 5'-nucleotidase [EC:3.1.3.5]
D      comp55752_c0_seq1; <a href="/dbget-bin/www_bget?ko:K01240">K01240</a>  URH1; uridine nucleosidase [EC:3.2.2.3]
D      comp54200_c0_seq7; <a href="/dbget-bin/www_bget?ko:K00761">K00761</a>  upp, UPRT; uracil phosphoribosyltransferase [EC:2.4.2.9]
D      comp53329_c0_seq1; <a href="/dbget-bin/www_bget?ko:K00207">K00207</a>  E1.3.1.2, DPYD; dihydropyrimidine dehydrogenase (NADP+) [EC:1.3.1.2]
D      comp53976_c0_seq1; <a href="/dbget-bin/www_bget?ko:K01464">K01464</a>  E3.5.2.2, DPYS; dihydropyrimidinase [EC:3.5.2.2]
D      comp53447_c0_seq1; <a href="/dbget-bin/www_bget?ko:K01431">K01431</a>  E3.5.1.6; beta-ureidopropionase [EC:3.5.1.6]
D      comp47906_c0_seq1; <a href="/dbget-bin/www_bget?ko:K00384">K00384</a>  E1.8.1.9, trxB; thioredoxin reductase (NADPH) [EC:1.8.1.9]
D      comp56357_c0_seq1; <a href="/dbget-bin/www_bget?ko:K00384">K00384</a>  E1.8.1.9, trxB; thioredoxin reductase (NADPH) [EC:1.8.1.9]
D      comp58919_c0_seq1; <a href="/dbget-bin/www_bget?ko:K10807">K10807</a>  RRM1; ribonucleoside-diphosphate reductase subunit M1 [EC:1.17.4.1]
D      comp34112_c0_seq1; <a href="/dbget-bin/www_bget?ko:K10808">K10808</a>  RRM2; ribonucleoside-diphosphate reductase subunit M2 [EC:1.17.4.1]
D      comp52543_c0_seq1; <a href="/dbget-bin/www_bget?ko:K01520">K01520</a>  dut, DUT; dUTP pyrophosphatase [EC:3.6.1.23]
D      comp57414_c0_seq1; <a href="/dbget-bin/www_bget?ko:K13998">K13998</a>  DHFR-TS; dihydrofolate reductase / thymidylate synthase [EC:1.5.1.3 2.1.1.45]
D      comp51174_c0_seq1; <a href="/dbget-bin/www_bget?ko:K01489">K01489</a>  E3.5.4.5, cdd; cytidine deaminase [EC:3.5.4.5]
D      comp51481_c0_seq1; <a href="/dbget-bin/www_bget?ko:K01493">K01493</a>  comEB; dCMP deaminase [EC:3.5.4.12]
D      comp46738_c0_seq1; <a href="/dbget-bin/www_bget?ko:K00857">K00857</a>  E2.7.1.21, tdk; thymidine kinase [EC:2.7.1.21]
D      comp56857_c0_seq3; <a href="/dbget-bin/www_bget?ko:K00857">K00857</a>  E2.7.1.21, tdk; thymidine kinase [EC:2.7.1.21]
D      comp45852_c0_seq1; <a href="/dbget-bin/www_bget?ko:K00943">K00943</a>  E2.7.4.9, tmk; dTMP kinase [EC:2.7.4.9]
D      comp48484_c0_seq1; <a href="/dbget-bin/www_bget?ko:K16329">K16329</a>  psuG; pseudouridine-5'-phosphate glycosidase [EC:3.2.-.-]
B
B  <b>Amino acid metabolism</b>
C    00250 Alanine, aspartate and glutamate metabolism [PATH:<a href="http://www.kegg.jp/kegg-bin/show_pathway?@ko00250/K14454/K14455/K00811/K00278/K01953/K13566/K00814/K00830/K00827/K14272/K01940/K01755/K01939/K01756/K00609/K01580/K16871/K00135/K00264/K00261/K00262/K00294/K01915/K01955/K01956/K00820/K00764">ko00250</a>]
D      comp44326_c0_seq1; <a href="/dbget-bin/www_bget?ko:K14454">K14454</a>  GOT1; aspartate aminotransferase, cytoplasmic [EC:2.6.1.1]
D      comp52813_c2_seq3; <a href="/dbget-bin/www_bget?ko:K14455">K14455</a>  GOT2; aspartate aminotransferase, mitochondrial [EC:2.6.1.1]
D      comp41956_c0_seq1; <a href="/dbget-bin/www_bget?ko:K00811">K00811</a>  ASP5; aspartate aminotransferase, chloroplastic [EC:2.6.1.1]
D      comp57169_c0_seq8; <a href="/dbget-bin/www_bget?ko:K00278">K00278</a>  nadB; L-aspartate oxidase [EC:1.4.3.16]
D      comp58038_c2_seq1; <a href="/dbget-bin/www_bget?ko:K01953">K01953</a>  asnB, ASNS; asparagine synthase (glutamine-hydrolysing) [EC:6.3.5.4]
D      comp49418_c0_seq1; <a href="/dbget-bin/www_bget?ko:K13566">K13566</a>  NIT2; omega-amidase [EC:3.5.1.3]
D      comp57824_c0_seq1; <a href="/dbget-bin/www_bget?ko:K00814">K00814</a>  GPT, ALT; alanine transaminase [EC:2.6.1.2]
D      comp57990_c0_seq3; <a href="/dbget-bin/www_bget?ko:K00830">K00830</a>  AGXT; alanine-glyoxylate transaminase / serine-glyoxylate transaminase / serine-pyruvate transaminase [EC:2.6.1.44 2.6.1.45 2.6.1.51]
D      comp55753_c0_seq2; <a href="/dbget-bin/www_bget?ko:K00827">K00827</a>  AGXT2; alanine-glyoxylate transaminase / (R)-3-amino-2-methylpropionate-pyruvate transaminase [EC:2.6.1.44 2.6.1.40]
D      comp61959_c0_seq1; <a href="/dbget-bin/www_bget?ko:K00827">K00827</a>  AGXT2; alanine-glyoxylate transaminase / (R)-3-amino-2-methylpropionate-pyruvate transaminase [EC:2.6.1.44 2.6.1.40]
D      comp57880_c0_seq2; <a href="/dbget-bin/www_bget?ko:K14272">K14272</a>  GGAT; glutamate--glyoxylate aminotransferase [EC:2.6.1.4 2.6.1.2 2.6.1.44 2.6.1.-]
D      comp58067_c0_seq2; <a href="/dbget-bin/www_bget?ko:K01940">K01940</a>  E6.3.4.5, argG; argininosuccinate synthase [EC:6.3.4.5]
D      comp53899_c0_seq1; <a href="/dbget-bin/www_bget?ko:K01755">K01755</a>  argH, ASL; argininosuccinate lyase [EC:4.3.2.1]
D      comp50130_c0_seq2; <a href="/dbget-bin/www_bget?ko:K01939">K01939</a>  E6.3.4.4, purA; adenylosuccinate synthase [EC:6.3.4.4]
D      comp51709_c0_seq1; <a href="/dbget-bin/www_bget?ko:K01756">K01756</a>  purB, ADSL; adenylosuccinate lyase [EC:4.3.2.2]
D      comp47649_c0_seq1; <a href="/dbget-bin/www_bget?ko:K00609">K00609</a>  pyrB, PYR2; aspartate carbamoyltransferase catalytic subunit [EC:2.1.3.2]
D      comp56656_c0_seq1; <a href="/dbget-bin/www_bget?ko:K01580">K01580</a>  E4.1.1.15, gadB, gadA, GAD; glutamate decarboxylase [EC:4.1.1.15]
D      comp32411_c0_seq1; <a href="/dbget-bin/www_bget?ko:K16871">K16871</a>  POP2; 4-aminobutyrate---pyruvate transaminase [EC:2.6.1.96]
D      comp54238_c0_seq2; <a href="/dbget-bin/www_bget?ko:K00135">K00135</a>  E1.2.1.16, gabD; succinate-semialdehyde dehydrogenase (NADP+) [EC:1.2.1.16]
D      comp60126_c0_seq2; <a href="/dbget-bin/www_bget?ko:K00264">K00264</a>  GLT1; glutamate synthase (NADPH/NADH) [EC:1.4.1.13 1.4.1.14]
D      comp58351_c0_seq1; <a href="/dbget-bin/www_bget?ko:K00261">K00261</a>  GLUD1_2, gdhA; glutamate dehydrogenase (NAD(P)+) [EC:1.4.1.3]
D      comp59273_c0_seq2; <a href="/dbget-bin/www_bget?ko:K00261">K00261</a>  GLUD1_2, gdhA; glutamate dehydrogenase (NAD(P)+) [EC:1.4.1.3]
D      comp59116_c0_seq13; <a href="/dbget-bin/www_bget?ko:K00262">K00262</a>  E1.4.1.4, gdhA; glutamate dehydrogenase (NADP+) [EC:1.4.1.4]
D      comp55765_c1_seq1; <a href="/dbget-bin/www_bget?ko:K00294">K00294</a>  E1.5.1.12; 1-pyrroline-5-carboxylate dehydrogenase [EC:1.5.1.12]
D      comp43799_c0_seq1; <a href="/dbget-bin/www_bget?ko:K01915">K01915</a>  glnA; glutamine synthetase [EC:6.3.1.2]
D      comp54256_c0_seq1; <a href="/dbget-bin/www_bget?ko:K01915">K01915</a>  glnA; glutamine synthetase [EC:6.3.1.2]
D      comp51248_c0_seq4; <a href="/dbget-bin/www_bget?ko:K01955">K01955</a>  carB, CPA2; carbamoyl-phosphate synthase large subunit [EC:6.3.5.5]
D      comp59636_c1_seq3; <a href="/dbget-bin/www_bget?ko:K01956">K01956</a>  carA, CPA1; carbamoyl-phosphate synthase small subunit [EC:6.3.5.5]
D      comp48874_c0_seq1; <a href="/dbget-bin/www_bget?ko:K00820">K00820</a>  E2.6.1.16, glmS; glucosamine--fructose-6-phosphate aminotransferase (isomerizing) [EC:2.6.1.16]
D      comp55902_c0_seq2; <a href="/dbget-bin/www_bget?ko:K00764">K00764</a>  purF, PPAT; amidophosphoribosyltransferase [EC:2.4.2.14]
C    00260 Glycine, serine and threonine metabolism [PATH:<a href="http://www.kegg.jp/kegg-bin/show_pathway?@ko00260/K00928/K12524/K00133/K00872/K01733/K01620/K00600/K01079/K00831/K00058/K15918/K01834/K15633/K15634/K15893/K15919/K00276/K00281/K00605/K00382/K00830/K00827/K14272/K00130/K14085/K01754/K01695/K01696/K06001">ko00260</a>]
D      comp56789_c2_seq1; <a href="/dbget-bin/www_bget?ko:K00928">K00928</a>  lysC; aspartate kinase [EC:2.7.2.4]
D      comp58732_c0_seq2; <a href="/dbget-bin/www_bget?ko:K12524">K12524</a>  thrA; bifunctional aspartokinase / homoserine dehydrogenase 1 [EC:2.7.2.4 1.1.1.3]
D      comp63552_c0_seq1; <a href="/dbget-bin/www_bget?ko:K00133">K00133</a>  asd; aspartate-semialdehyde dehydrogenase [EC:1.2.1.11]
D      comp53251_c1_seq4; <a href="/dbget-bin/www_bget?ko:K00872">K00872</a>  thrB1; homoserine kinase [EC:2.7.1.39]
D      comp58626_c0_seq4; <a href="/dbget-bin/www_bget?ko:K01733">K01733</a>  thrC; threonine synthase [EC:4.2.3.1]
D      comp56886_c0_seq2; <a href="/dbget-bin/www_bget?ko:K01620">K01620</a>  ltaE; threonine aldolase [EC:4.1.2.5]
D      comp54510_c0_seq1; <a href="/dbget-bin/www_bget?ko:K00600">K00600</a>  glyA, SHMT; glycine hydroxymethyltransferase [EC:2.1.2.1]
D      comp56200_c0_seq1; <a href="/dbget-bin/www_bget?ko:K00600">K00600</a>  glyA, SHMT; glycine hydroxymethyltransferase [EC:2.1.2.1]
D      comp56514_c0_seq1; <a href="/dbget-bin/www_bget?ko:K00600">K00600</a>  glyA, SHMT; glycine hydroxymethyltransferase [EC:2.1.2.1]
D      comp58011_c1_seq1; <a href="/dbget-bin/www_bget?ko:K00600">K00600</a>  glyA, SHMT; glycine hydroxymethyltransferase [EC:2.1.2.1]
D      comp23519_c0_seq1; <a href="/dbget-bin/www_bget?ko:K01079">K01079</a>  serB, PSPH; phosphoserine phosphatase [EC:3.1.3.3]
D      comp55250_c0_seq1; <a href="/dbget-bin/www_bget?ko:K00831">K00831</a>  serC, PSAT1; phosphoserine aminotransferase [EC:2.6.1.52]
D      comp57702_c0_seq3; <a href="/dbget-bin/www_bget?ko:K00058">K00058</a>  serA, PHGDH; D-3-phosphoglycerate dehydrogenase [EC:1.1.1.95]
D      comp58363_c0_seq4; <a href="/dbget-bin/www_bget?ko:K15918">K15918</a>  GLYK; D-glycerate 3-kinase [EC:2.7.1.31]
D      comp57359_c0_seq1; <a href="/dbget-bin/www_bget?ko:K01834">K01834</a>  PGAM, gpmA; 2,3-bisphosphoglycerate-dependent phosphoglycerate mutase [EC:5.4.2.1]
D      comp56438_c0_seq1; <a href="/dbget-bin/www_bget?ko:K15633">K15633</a>  gpmI; 2,3-bisphosphoglycerate-independent phosphoglycerate mutase [EC:5.4.2.1]
D      comp51488_c0_seq1; <a href="/dbget-bin/www_bget?ko:K15634">K15634</a>  gpmB; probable phosphoglycerate mutase [EC:5.4.2.1]
D      comp53729_c0_seq17; <a href="/dbget-bin/www_bget?ko:K15634">K15634</a>  gpmB; probable phosphoglycerate mutase [EC:5.4.2.1]
D      comp43831_c0_seq1; <a href="/dbget-bin/www_bget?ko:K15893">K15893</a>  HPR1; hydroxypyruvate reductase 1
D      comp48261_c0_seq1; <a href="/dbget-bin/www_bget?ko:K15919">K15919</a>  HPR2; hydroxypyruvate reductase 2
D      comp59824_c3_seq3; <a href="/dbget-bin/www_bget?ko:K00276">K00276</a>  E1.4.3.21, AOC2, AOC3, tynA; primary-amine oxidase [EC:1.4.3.21]
D      comp59987_c0_seq2; <a href="/dbget-bin/www_bget?ko:K00281">K00281</a>  GLDC, gcvP; glycine dehydrogenase [EC:1.4.4.2]
D      comp57653_c0_seq2; <a href="/dbget-bin/www_bget?ko:K00605">K00605</a>  gcvT, AMT; aminomethyltransferase [EC:2.1.2.10]
D      comp56989_c0_seq1; <a href="/dbget-bin/www_bget?ko:K00382">K00382</a>  DLD, lpd, pdhD; dihydrolipoamide dehydrogenase [EC:1.8.1.4]
D      comp59443_c0_seq6; <a href="/dbget-bin/www_bget?ko:K00382">K00382</a>  DLD, lpd, pdhD; dihydrolipoamide dehydrogenase [EC:1.8.1.4]
D      comp57990_c0_seq3; <a href="/dbget-bin/www_bget?ko:K00830">K00830</a>  AGXT; alanine-glyoxylate transaminase / serine-glyoxylate transaminase / serine-pyruvate transaminase [EC:2.6.1.44 2.6.1.45 2.6.1.51]
D      comp55753_c0_seq2; <a href="/dbget-bin/www_bget?ko:K00827">K00827</a>  AGXT2; alanine-glyoxylate transaminase / (R)-3-amino-2-methylpropionate-pyruvate transaminase [EC:2.6.1.44 2.6.1.40]
D      comp61959_c0_seq1; <a href="/dbget-bin/www_bget?ko:K00827">K00827</a>  AGXT2; alanine-glyoxylate transaminase / (R)-3-amino-2-methylpropionate-pyruvate transaminase [EC:2.6.1.44 2.6.1.40]
D      comp57880_c0_seq2; <a href="/dbget-bin/www_bget?ko:K14272">K14272</a>  GGAT; glutamate--glyoxylate aminotransferase [EC:2.6.1.4 2.6.1.2 2.6.1.44 2.6.1.-]
D      comp51741_c0_seq1; <a href="/dbget-bin/www_bget?ko:K00130">K00130</a>  betB, gbsA; betaine-aldehyde dehydrogenase [EC:1.2.1.8]
D      comp59070_c0_seq1; <a href="/dbget-bin/www_bget?ko:K14085">K14085</a>  ALDH7A1; aldehyde dehydrogenase family 7 member A1 [EC:1.2.1.31 1.2.1.8 1.2.1.3]
D      comp8055_c0_seq1; <a href="/dbget-bin/www_bget?ko:K01754">K01754</a>  E4.3.1.19, ilvA, tdcB; threonine dehydratase [EC:4.3.1.19]
D      comp56458_c0_seq5; <a href="/dbget-bin/www_bget?ko:K01695">K01695</a>  trpA; tryptophan synthase alpha chain [EC:4.2.1.20]
D      comp43357_c0_seq1; <a href="/dbget-bin/www_bget?ko:K01696">K01696</a>  trpB; tryptophan synthase beta chain [EC:4.2.1.20]
D      comp56917_c0_seq1; <a href="/dbget-bin/www_bget?ko:K01696">K01696</a>  trpB; tryptophan synthase beta chain [EC:4.2.1.20]
D      comp57377_c1_seq1; <a href="/dbget-bin/www_bget?ko:K06001">K06001</a>  K06001, trpB; tryptophan synthase beta chain [EC:4.2.1.20]
C    00270 Cysteine and methionine metabolism [PATH:<a href="http://www.kegg.jp/kegg-bin/show_pathway?@ko00270/K00640/K01738/K13034/K01760/K00547/K00549/K00789/K01611/K00797/K01244/K00899/K08963/K16054/K08967/K00815/K00558/K17398/K01251/K01762/K05933/K00928/K12524/K00133/K01739/K14454/K14455/K00811/K01011/K00016/K01761">ko00270</a>]
D      comp52345_c0_seq1; <a href="/dbget-bin/www_bget?ko:K00640">K00640</a>  cysE; serine O-acetyltransferase [EC:2.3.1.30]
D      comp53425_c0_seq1; <a href="/dbget-bin/www_bget?ko:K00640">K00640</a>  cysE; serine O-acetyltransferase [EC:2.3.1.30]
D      comp55766_c0_seq9; <a href="/dbget-bin/www_bget?ko:K00640">K00640</a>  cysE; serine O-acetyltransferase [EC:2.3.1.30]
D      comp42883_c0_seq2; <a href="/dbget-bin/www_bget?ko:K01738">K01738</a>  cysK; cysteine synthase A [EC:2.5.1.47]
D      comp49825_c0_seq1; <a href="/dbget-bin/www_bget?ko:K01738">K01738</a>  cysK; cysteine synthase A [EC:2.5.1.47]
D      comp53009_c0_seq1; <a href="/dbget-bin/www_bget?ko:K01738">K01738</a>  cysK; cysteine synthase A [EC:2.5.1.47]
D      comp57097_c1_seq1; <a href="/dbget-bin/www_bget?ko:K01738">K01738</a>  cysK; cysteine synthase A [EC:2.5.1.47]
D      comp47308_c0_seq2; <a href="/dbget-bin/www_bget?ko:K13034">K13034</a>  ATCYSC1; L-3-cyanoalanine synthase/ cysteine synthase [EC:2.5.1.47 4.4.1.9]
D      comp58813_c0_seq9; <a href="/dbget-bin/www_bget?ko:K01760">K01760</a>  metC; cystathionine beta-lyase [EC:4.4.1.8]
D      comp28723_c0_seq1; <a href="/dbget-bin/www_bget?ko:K00547">K00547</a>  mmuM; homocysteine S-methyltransferase [EC:2.1.1.10]
D      comp55417_c0_seq1; <a href="/dbget-bin/www_bget?ko:K00547">K00547</a>  mmuM; homocysteine S-methyltransferase [EC:2.1.1.10]
D      comp58201_c0_seq4; <a href="/dbget-bin/www_bget?ko:K00547">K00547</a>  mmuM; homocysteine S-methyltransferase [EC:2.1.1.10]
D      comp59437_c0_seq5; <a href="/dbget-bin/www_bget?ko:K00549">K00549</a>  metE; 5-methyltetrahydropteroyltriglutamate--homocysteine methyltransferase [EC:2.1.1.14]
D      comp55185_c0_seq1; <a href="/dbget-bin/www_bget?ko:K00789">K00789</a>  metK; S-adenosylmethionine synthetase [EC:2.5.1.6]
D      comp56654_c0_seq1; <a href="/dbget-bin/www_bget?ko:K00789">K00789</a>  metK; S-adenosylmethionine synthetase [EC:2.5.1.6]
D      comp52451_c0_seq1; <a href="/dbget-bin/www_bget?ko:K01611">K01611</a>  speD, AMD1; S-adenosylmethionine decarboxylase [EC:4.1.1.50]
D      comp54265_c0_seq1; <a href="/dbget-bin/www_bget?ko:K01611">K01611</a>  speD, AMD1; S-adenosylmethionine decarboxylase [EC:4.1.1.50]
D      comp56353_c1_seq5; <a href="/dbget-bin/www_bget?ko:K01611">K01611</a>  speD, AMD1; S-adenosylmethionine decarboxylase [EC:4.1.1.50]
D      comp45904_c0_seq1; <a href="/dbget-bin/www_bget?ko:K00797">K00797</a>  speE, SRM; spermidine synthase [EC:2.5.1.16]
D      comp57184_c0_seq2; <a href="/dbget-bin/www_bget?ko:K00797">K00797</a>  speE, SRM; spermidine synthase [EC:2.5.1.16]
D      comp57912_c3_seq1; <a href="/dbget-bin/www_bget?ko:K00797">K00797</a>  speE, SRM; spermidine synthase [EC:2.5.1.16]
D      comp45452_c0_seq2; <a href="/dbget-bin/www_bget?ko:K01244">K01244</a>  MTN; 5'-methylthioadenosine nucleosidase [EC:3.2.2.16]
D      comp47834_c0_seq1; <a href="/dbget-bin/www_bget?ko:K00899">K00899</a>  mtnK; 5-methylthioribose kinase [EC:2.7.1.100]
D      comp48045_c0_seq1; <a href="/dbget-bin/www_bget?ko:K08963">K08963</a>  mtnA; methylthioribose-1-phosphate isomerase [EC:5.3.1.23]
D      comp44199_c0_seq1; <a href="/dbget-bin/www_bget?ko:K16054">K16054</a>  DEP1; methylthioribulose 1-phosphate dehydratase / enolase-phosphatase E1 [EC:4.2.1.109 3.1.3.77]
D      comp46409_c0_seq2; <a href="/dbget-bin/www_bget?ko:K08967">K08967</a>  mtnD, mtnZ, ADI1; 1,2-dihydroxy-3-keto-5-methylthiopentene dioxygenase [EC:1.13.11.53 1.13.11.54]
D      comp53684_c0_seq3; <a href="/dbget-bin/www_bget?ko:K08967">K08967</a>  mtnD, mtnZ, ADI1; 1,2-dihydroxy-3-keto-5-methylthiopentene dioxygenase [EC:1.13.11.53 1.13.11.54]
D      comp47482_c0_seq4; <a href="/dbget-bin/www_bget?ko:K00815">K00815</a>  TAT; tyrosine aminotransferase [EC:2.6.1.5]
D      comp52735_c0_seq3; <a href="/dbget-bin/www_bget?ko:K00815">K00815</a>  TAT; tyrosine aminotransferase [EC:2.6.1.5]
D      comp47283_c0_seq2; <a href="/dbget-bin/www_bget?ko:K00558">K00558</a>  DNMT1, dcm; DNA (cytosine-5)-methyltransferase 1 [EC:2.1.1.37]
D      comp53511_c0_seq1; <a href="/dbget-bin/www_bget?ko:K00558">K00558</a>  DNMT1, dcm; DNA (cytosine-5)-methyltransferase 1 [EC:2.1.1.37]
D      comp54738_c0_seq1; <a href="/dbget-bin/www_bget?ko:K00558">K00558</a>  DNMT1, dcm; DNA (cytosine-5)-methyltransferase 1 [EC:2.1.1.37]
D      comp59926_c0_seq3; <a href="/dbget-bin/www_bget?ko:K17398">K17398</a>  DNMT3A; DNA (cytosine-5)-methyltransferase 3A [EC:2.1.1.37]
D      comp58979_c0_seq9; <a href="/dbget-bin/www_bget?ko:K01251">K01251</a>  E3.3.1.1, ahcY; adenosylhomocysteinase [EC:3.3.1.1]
D      comp30739_c0_seq1; <a href="/dbget-bin/www_bget?ko:K01762">K01762</a>  ACS; 1-aminocyclopropane-1-carboxylate synthase [EC:4.4.1.14]
D      comp37422_c0_seq1; <a href="/dbget-bin/www_bget?ko:K05933">K05933</a>  E1.14.17.4; aminocyclopropanecarboxylate oxidase [EC:1.14.17.4]
D      comp43340_c0_seq1; <a href="/dbget-bin/www_bget?ko:K05933">K05933</a>  E1.14.17.4; aminocyclopropanecarboxylate oxidase [EC:1.14.17.4]
D      comp55428_c1_seq3; <a href="/dbget-bin/www_bget?ko:K05933">K05933</a>  E1.14.17.4; aminocyclopropanecarboxylate oxidase [EC:1.14.17.4]
D      comp56789_c2_seq1; <a href="/dbget-bin/www_bget?ko:K00928">K00928</a>  lysC; aspartate kinase [EC:2.7.2.4]
D      comp58732_c0_seq2; <a href="/dbget-bin/www_bget?ko:K12524">K12524</a>  thrA; bifunctional aspartokinase / homoserine dehydrogenase 1 [EC:2.7.2.4 1.1.1.3]
D      comp63552_c0_seq1; <a href="/dbget-bin/www_bget?ko:K00133">K00133</a>  asd; aspartate-semialdehyde dehydrogenase [EC:1.2.1.11]
D      comp57840_c0_seq1; <a href="/dbget-bin/www_bget?ko:K01739">K01739</a>  metB; cystathionine gamma-synthase [EC:2.5.1.48]
D      comp44326_c0_seq1; <a href="/dbget-bin/www_bget?ko:K14454">K14454</a>  GOT1; aspartate aminotransferase, cytoplasmic [EC:2.6.1.1]
D      comp52813_c2_seq3; <a href="/dbget-bin/www_bget?ko:K14455">K14455</a>  GOT2; aspartate aminotransferase, mitochondrial [EC:2.6.1.1]
D      comp41956_c0_seq1; <a href="/dbget-bin/www_bget?ko:K00811">K00811</a>  ASP5; aspartate aminotransferase, chloroplastic [EC:2.6.1.1]
D      comp57574_c3_seq16; <a href="/dbget-bin/www_bget?ko:K01011">K01011</a>  TST, MPST, sseA; thiosulfate/3-mercaptopyruvate sulfurtransferase [EC:2.8.1.1 2.8.1.2]
D      comp52609_c1_seq2; <a href="/dbget-bin/www_bget?ko:K00016">K00016</a>  LDH, ldh; L-lactate dehydrogenase [EC:1.1.1.27]
D      comp53680_c1_seq2; <a href="/dbget-bin/www_bget?ko:K01761">K01761</a>  E4.4.1.11; methionine-gamma-lyase [EC:4.4.1.11]
C    00280 Valine, leucine and isoleucine degradation [PATH:<a href="http://www.kegg.jp/kegg-bin/show_pathway?@ko00280/K00826/K00166/K09699/K00382/K00249/K00253/K07513/K05605/K00020/K00140/K00128/K14085/K01968/K01969/K05607/K01640/K00626/K01641">ko00280</a>]
D      comp36700_c0_seq1; <a href="/dbget-bin/www_bget?ko:K00826">K00826</a>  E2.6.1.42, ilvE; branched-chain amino acid aminotransferase [EC:2.6.1.42]
D      comp44263_c0_seq2; <a href="/dbget-bin/www_bget?ko:K00826">K00826</a>  E2.6.1.42, ilvE; branched-chain amino acid aminotransferase [EC:2.6.1.42]
D      comp46288_c0_seq2; <a href="/dbget-bin/www_bget?ko:K00826">K00826</a>  E2.6.1.42, ilvE; branched-chain amino acid aminotransferase [EC:2.6.1.42]
D      comp52365_c1_seq1; <a href="/dbget-bin/www_bget?ko:K00826">K00826</a>  E2.6.1.42, ilvE; branched-chain amino acid aminotransferase [EC:2.6.1.42]
D      comp57777_c1_seq1; <a href="/dbget-bin/www_bget?ko:K00826">K00826</a>  E2.6.1.42, ilvE; branched-chain amino acid aminotransferase [EC:2.6.1.42]
D      comp51096_c0_seq2; <a href="/dbget-bin/www_bget?ko:K00166">K00166</a>  E1.2.4.4A, bkdA1; 2-oxoisovalerate dehydrogenase E1 component, alpha subunit [EC:1.2.4.4]
D      comp53522_c0_seq5; <a href="/dbget-bin/www_bget?ko:K00166">K00166</a>  E1.2.4.4A, bkdA1; 2-oxoisovalerate dehydrogenase E1 component, alpha subunit [EC:1.2.4.4]
D      comp57438_c1_seq4; <a href="/dbget-bin/www_bget?ko:K09699">K09699</a>  E2.3.1.168, bkdB; 2-oxoisovalerate dehydrogenase E2 component (dihydrolipoyl transacylase) [EC:2.3.1.168]
D      comp56989_c0_seq1; <a href="/dbget-bin/www_bget?ko:K00382">K00382</a>  DLD, lpd, pdhD; dihydrolipoamide dehydrogenase [EC:1.8.1.4]
D      comp59443_c0_seq6; <a href="/dbget-bin/www_bget?ko:K00382">K00382</a>  DLD, lpd, pdhD; dihydrolipoamide dehydrogenase [EC:1.8.1.4]
D      comp47886_c1_seq1; <a href="/dbget-bin/www_bget?ko:K00249">K00249</a>  ACADM, acd; acyl-CoA dehydrogenase [EC:1.3.8.7]
D      comp57570_c1_seq5; <a href="/dbget-bin/www_bget?ko:K00253">K00253</a>  IVD, ivd; isovaleryl-CoA dehydrogenase [EC:1.3.8.4]
D      comp31526_c0_seq1; <a href="/dbget-bin/www_bget?ko:K07513">K07513</a>  ACAA1; acetyl-CoA acyltransferase 1 [EC:2.3.1.16]
D      comp49594_c0_seq1; <a href="/dbget-bin/www_bget?ko:K07513">K07513</a>  ACAA1; acetyl-CoA acyltransferase 1 [EC:2.3.1.16]
D      comp27635_c0_seq2; <a href="/dbget-bin/www_bget?ko:K05605">K05605</a>  HIBCH; 3-hydroxyisobutyryl-CoA hydrolase [EC:3.1.2.4]
D      comp52137_c0_seq1; <a href="/dbget-bin/www_bget?ko:K05605">K05605</a>  HIBCH; 3-hydroxyisobutyryl-CoA hydrolase [EC:3.1.2.4]
D      comp55025_c0_seq1; <a href="/dbget-bin/www_bget?ko:K05605">K05605</a>  HIBCH; 3-hydroxyisobutyryl-CoA hydrolase [EC:3.1.2.4]
D      comp50084_c0_seq2; <a href="/dbget-bin/www_bget?ko:K00020">K00020</a>  E1.1.1.31, mmsB; 3-hydroxyisobutyrate dehydrogenase [EC:1.1.1.31]
D      comp57326_c0_seq2; <a href="/dbget-bin/www_bget?ko:K00140">K00140</a>  mmsA, iolA, ALDH6A1; malonate-semialdehyde dehydrogenase (acetylating) / methylmalonate-semialdehyde dehydrogenase [EC:1.2.1.18 1.2.1.27]
D      comp44038_c0_seq3; <a href="/dbget-bin/www_bget?ko:K00128">K00128</a>  E1.2.1.3; aldehyde dehydrogenase (NAD+) [EC:1.2.1.3]
D      comp44097_c0_seq4; <a href="/dbget-bin/www_bget?ko:K00128">K00128</a>  E1.2.1.3; aldehyde dehydrogenase (NAD+) [EC:1.2.1.3]
D      comp49751_c0_seq2; <a href="/dbget-bin/www_bget?ko:K00128">K00128</a>  E1.2.1.3; aldehyde dehydrogenase (NAD+) [EC:1.2.1.3]
D      comp58228_c0_seq4; <a href="/dbget-bin/www_bget?ko:K00128">K00128</a>  E1.2.1.3; aldehyde dehydrogenase (NAD+) [EC:1.2.1.3]
D      comp58879_c2_seq1; <a href="/dbget-bin/www_bget?ko:K00128">K00128</a>  E1.2.1.3; aldehyde dehydrogenase (NAD+) [EC:1.2.1.3]
D      comp59070_c0_seq1; <a href="/dbget-bin/www_bget?ko:K14085">K14085</a>  ALDH7A1; aldehyde dehydrogenase family 7 member A1 [EC:1.2.1.31 1.2.1.8 1.2.1.3]
D      comp58110_c0_seq2; <a href="/dbget-bin/www_bget?ko:K01968">K01968</a>  E6.4.1.4A; 3-methylcrotonyl-CoA carboxylase alpha subunit [EC:6.4.1.4]
D      comp53164_c0_seq2; <a href="/dbget-bin/www_bget?ko:K01969">K01969</a>  E6.4.1.4B; 3-methylcrotonyl-CoA carboxylase beta subunit [EC:6.4.1.4]
D      comp52048_c0_seq1; <a href="/dbget-bin/www_bget?ko:K05607">K05607</a>  AUH; methylglutaconyl-CoA hydratase [EC:4.2.1.18]
D      comp57073_c2_seq3; <a href="/dbget-bin/www_bget?ko:K01640">K01640</a>  E4.1.3.4, HMGCL, hmgL; hydroxymethylglutaryl-CoA lyase [EC:4.1.3.4]
D      comp57174_c2_seq6; <a href="/dbget-bin/www_bget?ko:K01640">K01640</a>  E4.1.3.4, HMGCL, hmgL; hydroxymethylglutaryl-CoA lyase [EC:4.1.3.4]
D      comp55836_c0_seq2; <a href="/dbget-bin/www_bget?ko:K00626">K00626</a>  E2.3.1.9, atoB; acetyl-CoA C-acetyltransferase [EC:2.3.1.9]
D      comp58238_c0_seq1; <a href="/dbget-bin/www_bget?ko:K00626">K00626</a>  E2.3.1.9, atoB; acetyl-CoA C-acetyltransferase [EC:2.3.1.9]
D      comp58537_c0_seq2; <a href="/dbget-bin/www_bget?ko:K01641">K01641</a>  E2.3.3.10; hydroxymethylglutaryl-CoA synthase [EC:2.3.3.10]
C    00290 Valine, leucine and isoleucine biosynthesis [PATH:<a href="http://www.kegg.jp/kegg-bin/show_pathway?@ko00290/K01754/K01703/K01704/K00052/K01652/K01653/K00053/K01687/K00826/K01649">ko00290</a>]
D      comp8055_c0_seq1; <a href="/dbget-bin/www_bget?ko:K01754">K01754</a>  E4.3.1.19, ilvA, tdcB; threonine dehydratase [EC:4.3.1.19]
D      comp41778_c0_seq1; <a href="/dbget-bin/www_bget?ko:K01703">K01703</a>  leuC; 3-isopropylmalate/(R)-2-methylmalate dehydratase large subunit [EC:4.2.1.33 4.2.1.35]
D      comp53091_c0_seq1; <a href="/dbget-bin/www_bget?ko:K01704">K01704</a>  leuD; 3-isopropylmalate/(R)-2-methylmalate dehydratase small subunit [EC:4.2.1.33 4.2.1.35]
D      comp27679_c0_seq1; <a href="/dbget-bin/www_bget?ko:K00052">K00052</a>  leuB; 3-isopropylmalate dehydrogenase [EC:1.1.1.85]
D      comp57192_c0_seq2; <a href="/dbget-bin/www_bget?ko:K01652">K01652</a>  E2.2.1.6L, ilvB, ilvG, ilvI; acetolactate synthase I/II/III large subunit [EC:2.2.1.6]
D      comp54908_c3_seq1; <a href="/dbget-bin/www_bget?ko:K01653">K01653</a>  E2.2.1.6S, ilvH, ilvN; acetolactate synthase I/III small subunit [EC:2.2.1.6]
D      comp58205_c0_seq2; <a href="/dbget-bin/www_bget?ko:K00053">K00053</a>  ilvC; ketol-acid reductoisomerase [EC:1.1.1.86]
D      comp45451_c0_seq4; <a href="/dbget-bin/www_bget?ko:K01687">K01687</a>  ilvD; dihydroxy-acid dehydratase [EC:4.2.1.9]
D      comp36700_c0_seq1; <a href="/dbget-bin/www_bget?ko:K00826">K00826</a>  E2.6.1.42, ilvE; branched-chain amino acid aminotransferase [EC:2.6.1.42]
D      comp44263_c0_seq2; <a href="/dbget-bin/www_bget?ko:K00826">K00826</a>  E2.6.1.42, ilvE; branched-chain amino acid aminotransferase [EC:2.6.1.42]
D      comp46288_c0_seq2; <a href="/dbget-bin/www_bget?ko:K00826">K00826</a>  E2.6.1.42, ilvE; branched-chain amino acid aminotransferase [EC:2.6.1.42]
D      comp52365_c1_seq1; <a href="/dbget-bin/www_bget?ko:K00826">K00826</a>  E2.6.1.42, ilvE; branched-chain amino acid aminotransferase [EC:2.6.1.42]
D      comp57777_c1_seq1; <a href="/dbget-bin/www_bget?ko:K00826">K00826</a>  E2.6.1.42, ilvE; branched-chain amino acid aminotransferase [EC:2.6.1.42]
D      comp50553_c0_seq3; <a href="/dbget-bin/www_bget?ko:K01649">K01649</a>  leuA; 2-isopropylmalate synthase [EC:2.3.3.13]
C    00300 Lysine biosynthesis [PATH:<a href="http://www.kegg.jp/kegg-bin/show_pathway?@ko00300/K00928/K12524/K00133/K01714/K00215/K01778/K10206/K01586/K14085">ko00300</a>]
D      comp56789_c2_seq1; <a href="/dbget-bin/www_bget?ko:K00928">K00928</a>  lysC; aspartate kinase [EC:2.7.2.4]
D      comp58732_c0_seq2; <a href="/dbget-bin/www_bget?ko:K12524">K12524</a>  thrA; bifunctional aspartokinase / homoserine dehydrogenase 1 [EC:2.7.2.4 1.1.1.3]
D      comp63552_c0_seq1; <a href="/dbget-bin/www_bget?ko:K00133">K00133</a>  asd; aspartate-semialdehyde dehydrogenase [EC:1.2.1.11]
D      comp57756_c0_seq1; <a href="/dbget-bin/www_bget?ko:K01714">K01714</a>  dapA; 4-hydroxy-tetrahydrodipicolinate synthase [EC:4.3.3.7]
D      comp54804_c1_seq7; <a href="/dbget-bin/www_bget?ko:K00215">K00215</a>  dapB; 4-hydroxy-tetrahydrodipicolinate reductase [EC:1.17.1.8]
D      comp51698_c0_seq1; <a href="/dbget-bin/www_bget?ko:K01778">K01778</a>  dapF; diaminopimelate epimerase [EC:5.1.1.7]
D      comp52899_c0_seq4; <a href="/dbget-bin/www_bget?ko:K10206">K10206</a>  E2.6.1.83; LL-diaminopimelate aminotransferase [EC:2.6.1.83]
D      comp61090_c0_seq1; <a href="/dbget-bin/www_bget?ko:K10206">K10206</a>  E2.6.1.83; LL-diaminopimelate aminotransferase [EC:2.6.1.83]
D      comp56551_c0_seq5; <a href="/dbget-bin/www_bget?ko:K01586">K01586</a>  lysA; diaminopimelate decarboxylase [EC:4.1.1.20]
D      comp59070_c0_seq1; <a href="/dbget-bin/www_bget?ko:K14085">K14085</a>  ALDH7A1; aldehyde dehydrogenase family 7 member A1 [EC:1.2.1.31 1.2.1.8 1.2.1.3]
C    00310 Lysine degradation [PATH:<a href="http://www.kegg.jp/kegg-bin/show_pathway?@ko00310/K14085/K00164/K00658/K00626/K11420/K11423/K00128">ko00310</a>]
D      comp59070_c0_seq1; <a href="/dbget-bin/www_bget?ko:K14085">K14085</a>  ALDH7A1; aldehyde dehydrogenase family 7 member A1 [EC:1.2.1.31 1.2.1.8 1.2.1.3]
D      comp54468_c0_seq1; <a href="/dbget-bin/www_bget?ko:K00164">K00164</a>  OGDH, sucA; 2-oxoglutarate dehydrogenase E1 component [EC:1.2.4.2]
D      comp57397_c0_seq3; <a href="/dbget-bin/www_bget?ko:K00658">K00658</a>  DLST, sucB; 2-oxoglutarate dehydrogenase E2 component (dihydrolipoamide succinyltransferase) [EC:2.3.1.61]
D      comp57803_c1_seq3; <a href="/dbget-bin/www_bget?ko:K00658">K00658</a>  DLST, sucB; 2-oxoglutarate dehydrogenase E2 component (dihydrolipoamide succinyltransferase) [EC:2.3.1.61]
D      comp55836_c0_seq2; <a href="/dbget-bin/www_bget?ko:K00626">K00626</a>  E2.3.1.9, atoB; acetyl-CoA C-acetyltransferase [EC:2.3.1.9]
D      comp58238_c0_seq1; <a href="/dbget-bin/www_bget?ko:K00626">K00626</a>  E2.3.1.9, atoB; acetyl-CoA C-acetyltransferase [EC:2.3.1.9]
D      comp50806_c0_seq1; <a href="/dbget-bin/www_bget?ko:K11420">K11420</a>  EHMT; euchromatic histone-lysine N-methyltransferase [EC:2.1.1.43]
D      comp56636_c1_seq2; <a href="/dbget-bin/www_bget?ko:K11420">K11420</a>  EHMT; euchromatic histone-lysine N-methyltransferase [EC:2.1.1.43]
D      comp57731_c0_seq4; <a href="/dbget-bin/www_bget?ko:K11420">K11420</a>  EHMT; euchromatic histone-lysine N-methyltransferase [EC:2.1.1.43]
D      comp58100_c1_seq6; <a href="/dbget-bin/www_bget?ko:K11420">K11420</a>  EHMT; euchromatic histone-lysine N-methyltransferase [EC:2.1.1.43]
D      comp58162_c2_seq3; <a href="/dbget-bin/www_bget?ko:K11420">K11420</a>  EHMT; euchromatic histone-lysine N-methyltransferase [EC:2.1.1.43]
D      comp57297_c0_seq23; <a href="/dbget-bin/www_bget?ko:K11423">K11423</a>  SETD2, SET2; histone-lysine N-methyltransferase SETD2 [EC:2.1.1.43]
D      comp44038_c0_seq3; <a href="/dbget-bin/www_bget?ko:K00128">K00128</a>  E1.2.1.3; aldehyde dehydrogenase (NAD+) [EC:1.2.1.3]
D      comp44097_c0_seq4; <a href="/dbget-bin/www_bget?ko:K00128">K00128</a>  E1.2.1.3; aldehyde dehydrogenase (NAD+) [EC:1.2.1.3]
D      comp49751_c0_seq2; <a href="/dbget-bin/www_bget?ko:K00128">K00128</a>  E1.2.1.3; aldehyde dehydrogenase (NAD+) [EC:1.2.1.3]
D      comp58228_c0_seq4; <a href="/dbget-bin/www_bget?ko:K00128">K00128</a>  E1.2.1.3; aldehyde dehydrogenase (NAD+) [EC:1.2.1.3]
D      comp58879_c2_seq1; <a href="/dbget-bin/www_bget?ko:K00128">K00128</a>  E1.2.1.3; aldehyde dehydrogenase (NAD+) [EC:1.2.1.3]
C    00330 Arginine and proline metabolism [PATH:<a href="http://www.kegg.jp/kegg-bin/show_pathway?@ko00330/K01583/K10536/K12251/K01581/K00797/K01611/K00128/K14085/K00819/K00286/K00318/K00294/K12657/K01259/K00472/K14454/K14455/K00811/K00611/K01940/K01755/K01476/K01427/K13427/K01915/K00261/K00262/K14682/K00620/K00145/K00818/K14677/K01438">ko00330</a>]
D      comp58725_c1_seq3; <a href="/dbget-bin/www_bget?ko:K01583">K01583</a>  E4.1.1.19; arginine decarboxylase [EC:4.1.1.19]
D      comp44245_c0_seq1; <a href="/dbget-bin/www_bget?ko:K10536">K10536</a>  E3.5.3.12; agmatine deiminase [EC:3.5.3.12]
D      comp46030_c0_seq1; <a href="/dbget-bin/www_bget?ko:K12251">K12251</a>  aguB; N-carbamoylputrescine amidase [EC:3.5.1.53]
D      comp47728_c0_seq1; <a href="/dbget-bin/www_bget?ko:K01581">K01581</a>  E4.1.1.17, ODC1, speC, speF; ornithine decarboxylase [EC:4.1.1.17]
D      comp45904_c0_seq1; <a href="/dbget-bin/www_bget?ko:K00797">K00797</a>  speE, SRM; spermidine synthase [EC:2.5.1.16]
D      comp57184_c0_seq2; <a href="/dbget-bin/www_bget?ko:K00797">K00797</a>  speE, SRM; spermidine synthase [EC:2.5.1.16]
D      comp57912_c3_seq1; <a href="/dbget-bin/www_bget?ko:K00797">K00797</a>  speE, SRM; spermidine synthase [EC:2.5.1.16]
D      comp52451_c0_seq1; <a href="/dbget-bin/www_bget?ko:K01611">K01611</a>  speD, AMD1; S-adenosylmethionine decarboxylase [EC:4.1.1.50]
D      comp54265_c0_seq1; <a href="/dbget-bin/www_bget?ko:K01611">K01611</a>  speD, AMD1; S-adenosylmethionine decarboxylase [EC:4.1.1.50]
D      comp56353_c1_seq5; <a href="/dbget-bin/www_bget?ko:K01611">K01611</a>  speD, AMD1; S-adenosylmethionine decarboxylase [EC:4.1.1.50]
D      comp44038_c0_seq3; <a href="/dbget-bin/www_bget?ko:K00128">K00128</a>  E1.2.1.3; aldehyde dehydrogenase (NAD+) [EC:1.2.1.3]
D      comp44097_c0_seq4; <a href="/dbget-bin/www_bget?ko:K00128">K00128</a>  E1.2.1.3; aldehyde dehydrogenase (NAD+) [EC:1.2.1.3]
D      comp49751_c0_seq2; <a href="/dbget-bin/www_bget?ko:K00128">K00128</a>  E1.2.1.3; aldehyde dehydrogenase (NAD+) [EC:1.2.1.3]
D      comp58228_c0_seq4; <a href="/dbget-bin/www_bget?ko:K00128">K00128</a>  E1.2.1.3; aldehyde dehydrogenase (NAD+) [EC:1.2.1.3]
D      comp58879_c2_seq1; <a href="/dbget-bin/www_bget?ko:K00128">K00128</a>  E1.2.1.3; aldehyde dehydrogenase (NAD+) [EC:1.2.1.3]
D      comp59070_c0_seq1; <a href="/dbget-bin/www_bget?ko:K14085">K14085</a>  ALDH7A1; aldehyde dehydrogenase family 7 member A1 [EC:1.2.1.31 1.2.1.8 1.2.1.3]
D      comp52251_c2_seq1; <a href="/dbget-bin/www_bget?ko:K00819">K00819</a>  E2.6.1.13, rocD; ornithine--oxo-acid transaminase [EC:2.6.1.13]
D      comp49877_c2_seq1; <a href="/dbget-bin/www_bget?ko:K00286">K00286</a>  E1.5.1.2, proC; pyrroline-5-carboxylate reductase [EC:1.5.1.2]
D      comp56976_c1_seq1; <a href="/dbget-bin/www_bget?ko:K00318">K00318</a>  E1.5.99.8; proline dehydrogenase [EC:1.5.99.8]
D      comp55765_c1_seq1; <a href="/dbget-bin/www_bget?ko:K00294">K00294</a>  E1.5.1.12; 1-pyrroline-5-carboxylate dehydrogenase [EC:1.5.1.12]
D      comp59376_c0_seq20; <a href="/dbget-bin/www_bget?ko:K12657">K12657</a>  ALDH18A1, P5CS; delta-1-pyrroline-5-carboxylate synthetase [EC:2.7.2.11 1.2.1.41]
D      comp55639_c0_seq4; <a href="/dbget-bin/www_bget?ko:K01259">K01259</a>  pip; proline iminopeptidase [EC:3.4.11.5]
D      comp38221_c0_seq1; <a href="/dbget-bin/www_bget?ko:K00472">K00472</a>  E1.14.11.2; prolyl 4-hydroxylase [EC:1.14.11.2]
D      comp40643_c0_seq1; <a href="/dbget-bin/www_bget?ko:K00472">K00472</a>  E1.14.11.2; prolyl 4-hydroxylase [EC:1.14.11.2]
D      comp51859_c0_seq5; <a href="/dbget-bin/www_bget?ko:K00472">K00472</a>  E1.14.11.2; prolyl 4-hydroxylase [EC:1.14.11.2]
D      comp51957_c1_seq2; <a href="/dbget-bin/www_bget?ko:K00472">K00472</a>  E1.14.11.2; prolyl 4-hydroxylase [EC:1.14.11.2]
D      comp54546_c0_seq3; <a href="/dbget-bin/www_bget?ko:K00472">K00472</a>  E1.14.11.2; prolyl 4-hydroxylase [EC:1.14.11.2]
D      comp54700_c0_seq2; <a href="/dbget-bin/www_bget?ko:K00472">K00472</a>  E1.14.11.2; prolyl 4-hydroxylase [EC:1.14.11.2]
D      comp44326_c0_seq1; <a href="/dbget-bin/www_bget?ko:K14454">K14454</a>  GOT1; aspartate aminotransferase, cytoplasmic [EC:2.6.1.1]
D      comp52813_c2_seq3; <a href="/dbget-bin/www_bget?ko:K14455">K14455</a>  GOT2; aspartate aminotransferase, mitochondrial [EC:2.6.1.1]
D      comp41956_c0_seq1; <a href="/dbget-bin/www_bget?ko:K00811">K00811</a>  ASP5; aspartate aminotransferase, chloroplastic [EC:2.6.1.1]
D      comp54304_c0_seq1; <a href="/dbget-bin/www_bget?ko:K00611">K00611</a>  OTC, argF, argI; ornithine carbamoyltransferase [EC:2.1.3.3]
D      comp58067_c0_seq2; <a href="/dbget-bin/www_bget?ko:K01940">K01940</a>  E6.3.4.5, argG; argininosuccinate synthase [EC:6.3.4.5]
D      comp53899_c0_seq1; <a href="/dbget-bin/www_bget?ko:K01755">K01755</a>  argH, ASL; argininosuccinate lyase [EC:4.3.2.1]
D      comp47914_c0_seq1; <a href="/dbget-bin/www_bget?ko:K01476">K01476</a>  E3.5.3.1, rocF, arg; arginase [EC:3.5.3.1]
D      comp47701_c0_seq2; <a href="/dbget-bin/www_bget?ko:K01427">K01427</a>  URE; urease [EC:3.5.1.5]
D      comp54018_c0_seq2; <a href="/dbget-bin/www_bget?ko:K13427">K13427</a>  NOA1; nitric-oxide synthase, plant [EC:1.14.13.39]
D      comp43799_c0_seq1; <a href="/dbget-bin/www_bget?ko:K01915">K01915</a>  glnA; glutamine synthetase [EC:6.3.1.2]
D      comp54256_c0_seq1; <a href="/dbget-bin/www_bget?ko:K01915">K01915</a>  glnA; glutamine synthetase [EC:6.3.1.2]
D      comp58351_c0_seq1; <a href="/dbget-bin/www_bget?ko:K00261">K00261</a>  GLUD1_2, gdhA; glutamate dehydrogenase (NAD(P)+) [EC:1.4.1.3]
D      comp59273_c0_seq2; <a href="/dbget-bin/www_bget?ko:K00261">K00261</a>  GLUD1_2, gdhA; glutamate dehydrogenase (NAD(P)+) [EC:1.4.1.3]
D      comp59116_c0_seq13; <a href="/dbget-bin/www_bget?ko:K00262">K00262</a>  E1.4.1.4, gdhA; glutamate dehydrogenase (NADP+) [EC:1.4.1.4]
D      comp57966_c0_seq3; <a href="/dbget-bin/www_bget?ko:K14682">K14682</a>  argAB; amino-acid N-acetyltransferase [EC:2.3.1.1]
D      comp53400_c0_seq7; <a href="/dbget-bin/www_bget?ko:K00620">K00620</a>  argJ; glutamate N-acetyltransferase / amino-acid N-acetyltransferase [EC:2.3.1.35 2.3.1.1]
D      comp54273_c0_seq2; <a href="/dbget-bin/www_bget?ko:K00145">K00145</a>  argC; N-acetyl-gamma-glutamyl-phosphate reductase [EC:1.2.1.38]
D      comp56172_c0_seq7; <a href="/dbget-bin/www_bget?ko:K00818">K00818</a>  E2.6.1.11, argD; acetylornithine aminotransferase [EC:2.6.1.11]
D      comp51713_c0_seq1; <a href="/dbget-bin/www_bget?ko:K14677">K14677</a>  ACY1; aminoacylase [EC:3.5.1.14]
D      comp54367_c0_seq1; <a href="/dbget-bin/www_bget?ko:K14677">K14677</a>  ACY1; aminoacylase [EC:3.5.1.14]
D      comp56189_c0_seq4; <a href="/dbget-bin/www_bget?ko:K01438">K01438</a>  argE; acetylornithine deacetylase [EC:3.5.1.16]
C    00340 Histidine metabolism [PATH:<a href="http://www.kegg.jp/kegg-bin/show_pathway?@ko00340/K00765/K01814/K01663/K01693/K00817/K00013/K01590/K00128/K14085/K00599">ko00340</a>]
D      comp52465_c0_seq5; <a href="/dbget-bin/www_bget?ko:K00765">K00765</a>  hisG; ATP phosphoribosyltransferase [EC:2.4.2.17]
D      comp51659_c0_seq2; <a href="/dbget-bin/www_bget?ko:K01814">K01814</a>  hisA; phosphoribosylformimino-5-aminoimidazole carboxamide ribotide isomerase [EC:5.3.1.16]
D      comp49863_c0_seq1; <a href="/dbget-bin/www_bget?ko:K01663">K01663</a>  HIS7; glutamine amidotransferase / cyclase [EC:2.4.2.- 4.1.3.-]
D      comp56964_c0_seq6; <a href="/dbget-bin/www_bget?ko:K01693">K01693</a>  E4.2.1.19, hisB; imidazoleglycerol-phosphate dehydratase [EC:4.2.1.19]
D      comp57622_c0_seq1; <a href="/dbget-bin/www_bget?ko:K00817">K00817</a>  hisC; histidinol-phosphate aminotransferase [EC:2.6.1.9]
D      comp42211_c0_seq1; <a href="/dbget-bin/www_bget?ko:K00013">K00013</a>  hisD; histidinol dehydrogenase [EC:1.1.1.23]
D      comp54983_c0_seq5; <a href="/dbget-bin/www_bget?ko:K01590">K01590</a>  hdc, HDC; histidine decarboxylase [EC:4.1.1.22]
D      comp44038_c0_seq3; <a href="/dbget-bin/www_bget?ko:K00128">K00128</a>  E1.2.1.3; aldehyde dehydrogenase (NAD+) [EC:1.2.1.3]
D      comp44097_c0_seq4; <a href="/dbget-bin/www_bget?ko:K00128">K00128</a>  E1.2.1.3; aldehyde dehydrogenase (NAD+) [EC:1.2.1.3]
D      comp49751_c0_seq2; <a href="/dbget-bin/www_bget?ko:K00128">K00128</a>  E1.2.1.3; aldehyde dehydrogenase (NAD+) [EC:1.2.1.3]
D      comp58228_c0_seq4; <a href="/dbget-bin/www_bget?ko:K00128">K00128</a>  E1.2.1.3; aldehyde dehydrogenase (NAD+) [EC:1.2.1.3]
D      comp58879_c2_seq1; <a href="/dbget-bin/www_bget?ko:K00128">K00128</a>  E1.2.1.3; aldehyde dehydrogenase (NAD+) [EC:1.2.1.3]
D      comp59070_c0_seq1; <a href="/dbget-bin/www_bget?ko:K14085">K14085</a>  ALDH7A1; aldehyde dehydrogenase family 7 member A1 [EC:1.2.1.31 1.2.1.8 1.2.1.3]
D      comp56021_c1_seq1; <a href="/dbget-bin/www_bget?ko:K00599">K00599</a>  E2.1.1.-;  [EC:2.1.1.-]
C    00350 Tyrosine metabolism [PATH:<a href="http://www.kegg.jp/kegg-bin/show_pathway?@ko00350/K14454/K14455/K00811/K15849/K00815/K00817/K00457/K00451/K01800/K01555/K01592/K00276/K00121/K00001/K00135/K00599/K01557">ko00350</a>]
D      comp44326_c0_seq1; <a href="/dbget-bin/www_bget?ko:K14454">K14454</a>  GOT1; aspartate aminotransferase, cytoplasmic [EC:2.6.1.1]
D      comp52813_c2_seq3; <a href="/dbget-bin/www_bget?ko:K14455">K14455</a>  GOT2; aspartate aminotransferase, mitochondrial [EC:2.6.1.1]
D      comp41956_c0_seq1; <a href="/dbget-bin/www_bget?ko:K00811">K00811</a>  ASP5; aspartate aminotransferase, chloroplastic [EC:2.6.1.1]
D      comp59013_c0_seq9; <a href="/dbget-bin/www_bget?ko:K15849">K15849</a>  PAT, AAT; bifunctional aspartate aminotransferase and glutamate/aspartate-prephenate aminotransferase [EC:2.6.1.1 2.6.1.78 2.6.1.79]
D      comp47482_c0_seq4; <a href="/dbget-bin/www_bget?ko:K00815">K00815</a>  TAT; tyrosine aminotransferase [EC:2.6.1.5]
D      comp52735_c0_seq3; <a href="/dbget-bin/www_bget?ko:K00815">K00815</a>  TAT; tyrosine aminotransferase [EC:2.6.1.5]
D      comp57622_c0_seq1; <a href="/dbget-bin/www_bget?ko:K00817">K00817</a>  hisC; histidinol-phosphate aminotransferase [EC:2.6.1.9]
D      comp52919_c0_seq1; <a href="/dbget-bin/www_bget?ko:K00457">K00457</a>  HPD, hppD; 4-hydroxyphenylpyruvate dioxygenase [EC:1.13.11.27]
D      comp49715_c0_seq1; <a href="/dbget-bin/www_bget?ko:K00451">K00451</a>  HGD, hmgA; homogentisate 1,2-dioxygenase [EC:1.13.11.5]
D      comp57389_c0_seq5; <a href="/dbget-bin/www_bget?ko:K01800">K01800</a>  maiA, GSTZ1; maleylacetoacetate isomerase [EC:5.2.1.2]
D      comp46413_c0_seq1; <a href="/dbget-bin/www_bget?ko:K01555">K01555</a>  FAH, fahA; fumarylacetoacetase [EC:3.7.1.2]
D      comp48319_c0_seq1; <a href="/dbget-bin/www_bget?ko:K01592">K01592</a>  E4.1.1.25; tyrosine decarboxylase [EC:4.1.1.25]
D      comp53571_c0_seq9; <a href="/dbget-bin/www_bget?ko:K01592">K01592</a>  E4.1.1.25; tyrosine decarboxylase [EC:4.1.1.25]
D      comp59824_c3_seq3; <a href="/dbget-bin/www_bget?ko:K00276">K00276</a>  E1.4.3.21, AOC2, AOC3, tynA; primary-amine oxidase [EC:1.4.3.21]
D      comp32193_c0_seq3; <a href="/dbget-bin/www_bget?ko:K00121">K00121</a>  frmA, ADH5, adhC; S-(hydroxymethyl)glutathione dehydrogenase / alcohol dehydrogenase [EC:1.1.1.284 1.1.1.1]
D      comp55546_c0_seq1; <a href="/dbget-bin/www_bget?ko:K00121">K00121</a>  frmA, ADH5, adhC; S-(hydroxymethyl)glutathione dehydrogenase / alcohol dehydrogenase [EC:1.1.1.284 1.1.1.1]
D      comp46391_c0_seq6; <a href="/dbget-bin/www_bget?ko:K00001">K00001</a>  E1.1.1.1, adh; alcohol dehydrogenase [EC:1.1.1.1]
D      comp47846_c0_seq1; <a href="/dbget-bin/www_bget?ko:K00001">K00001</a>  E1.1.1.1, adh; alcohol dehydrogenase [EC:1.1.1.1]
D      comp55735_c0_seq2; <a href="/dbget-bin/www_bget?ko:K00001">K00001</a>  E1.1.1.1, adh; alcohol dehydrogenase [EC:1.1.1.1]
D      comp56151_c0_seq6; <a href="/dbget-bin/www_bget?ko:K00001">K00001</a>  E1.1.1.1, adh; alcohol dehydrogenase [EC:1.1.1.1]
D      comp54238_c0_seq2; <a href="/dbget-bin/www_bget?ko:K00135">K00135</a>  E1.2.1.16, gabD; succinate-semialdehyde dehydrogenase (NADP+) [EC:1.2.1.16]
D      comp56021_c1_seq1; <a href="/dbget-bin/www_bget?ko:K00599">K00599</a>  E2.1.1.-;  [EC:2.1.1.-]
D      comp28135_c0_seq1; <a href="/dbget-bin/www_bget?ko:K01557">K01557</a>  FAHD1; acylpyruvate hydrolase [EC:3.7.1.5]
C    00360 Phenylalanine metabolism [PATH:<a href="http://www.kegg.jp/kegg-bin/show_pathway?@ko00360/K00276/K00074/K14454/K14455/K00811/K15849/K00815/K00817/K00457/K11188/K00430/K10775/K00487/K01904/K00588">ko00360</a>]
D      comp59824_c3_seq3; <a href="/dbget-bin/www_bget?ko:K00276">K00276</a>  E1.4.3.21, AOC2, AOC3, tynA; primary-amine oxidase [EC:1.4.3.21]
D      comp48614_c0_seq1; <a href="/dbget-bin/www_bget?ko:K00074">K00074</a>  paaH, hbd, fadB, mmgB; 3-hydroxybutyryl-CoA dehydrogenase [EC:1.1.1.157]
D      comp44326_c0_seq1; <a href="/dbget-bin/www_bget?ko:K14454">K14454</a>  GOT1; aspartate aminotransferase, cytoplasmic [EC:2.6.1.1]
D      comp52813_c2_seq3; <a href="/dbget-bin/www_bget?ko:K14455">K14455</a>  GOT2; aspartate aminotransferase, mitochondrial [EC:2.6.1.1]
D      comp41956_c0_seq1; <a href="/dbget-bin/www_bget?ko:K00811">K00811</a>  ASP5; aspartate aminotransferase, chloroplastic [EC:2.6.1.1]
D      comp59013_c0_seq9; <a href="/dbget-bin/www_bget?ko:K15849">K15849</a>  PAT, AAT; bifunctional aspartate aminotransferase and glutamate/aspartate-prephenate aminotransferase [EC:2.6.1.1 2.6.1.78 2.6.1.79]
D      comp47482_c0_seq4; <a href="/dbget-bin/www_bget?ko:K00815">K00815</a>  TAT; tyrosine aminotransferase [EC:2.6.1.5]
D      comp52735_c0_seq3; <a href="/dbget-bin/www_bget?ko:K00815">K00815</a>  TAT; tyrosine aminotransferase [EC:2.6.1.5]
D      comp57622_c0_seq1; <a href="/dbget-bin/www_bget?ko:K00817">K00817</a>  hisC; histidinol-phosphate aminotransferase [EC:2.6.1.9]
D      comp52919_c0_seq1; <a href="/dbget-bin/www_bget?ko:K00457">K00457</a>  HPD, hppD; 4-hydroxyphenylpyruvate dioxygenase [EC:1.13.11.27]
D      comp3824_c0_seq1; <a href="/dbget-bin/www_bget?ko:K11188">K11188</a>  PRDX6; peroxiredoxin 6, 1-Cys peroxiredoxin [EC:1.11.1.7 1.11.1.15 3.1.1.-]
D      comp32598_c0_seq1; <a href="/dbget-bin/www_bget?ko:K00430">K00430</a>  E1.11.1.7; peroxidase [EC:1.11.1.7]
D      comp36584_c0_seq2; <a href="/dbget-bin/www_bget?ko:K00430">K00430</a>  E1.11.1.7; peroxidase [EC:1.11.1.7]
D      comp36706_c0_seq1; <a href="/dbget-bin/www_bget?ko:K00430">K00430</a>  E1.11.1.7; peroxidase [EC:1.11.1.7]
D      comp37303_c0_seq1; <a href="/dbget-bin/www_bget?ko:K00430">K00430</a>  E1.11.1.7; peroxidase [EC:1.11.1.7]
D      comp44799_c0_seq1; <a href="/dbget-bin/www_bget?ko:K00430">K00430</a>  E1.11.1.7; peroxidase [EC:1.11.1.7]
D      comp45215_c0_seq1; <a href="/dbget-bin/www_bget?ko:K00430">K00430</a>  E1.11.1.7; peroxidase [EC:1.11.1.7]
D      comp45835_c0_seq1; <a href="/dbget-bin/www_bget?ko:K00430">K00430</a>  E1.11.1.7; peroxidase [EC:1.11.1.7]
D      comp46211_c0_seq1; <a href="/dbget-bin/www_bget?ko:K00430">K00430</a>  E1.11.1.7; peroxidase [EC:1.11.1.7]
D      comp47547_c0_seq1; <a href="/dbget-bin/www_bget?ko:K00430">K00430</a>  E1.11.1.7; peroxidase [EC:1.11.1.7]
D      comp47885_c0_seq2; <a href="/dbget-bin/www_bget?ko:K00430">K00430</a>  E1.11.1.7; peroxidase [EC:1.11.1.7]
D      comp47960_c0_seq2; <a href="/dbget-bin/www_bget?ko:K00430">K00430</a>  E1.11.1.7; peroxidase [EC:1.11.1.7]
D      comp48112_c0_seq4; <a href="/dbget-bin/www_bget?ko:K00430">K00430</a>  E1.11.1.7; peroxidase [EC:1.11.1.7]
D      comp48350_c0_seq1; <a href="/dbget-bin/www_bget?ko:K00430">K00430</a>  E1.11.1.7; peroxidase [EC:1.11.1.7]
D      comp49406_c1_seq1; <a href="/dbget-bin/www_bget?ko:K00430">K00430</a>  E1.11.1.7; peroxidase [EC:1.11.1.7]
D      comp50278_c0_seq1; <a href="/dbget-bin/www_bget?ko:K00430">K00430</a>  E1.11.1.7; peroxidase [EC:1.11.1.7]
D      comp50387_c0_seq1; <a href="/dbget-bin/www_bget?ko:K00430">K00430</a>  E1.11.1.7; peroxidase [EC:1.11.1.7]
D      comp50963_c0_seq1; <a href="/dbget-bin/www_bget?ko:K00430">K00430</a>  E1.11.1.7; peroxidase [EC:1.11.1.7]
D      comp51291_c0_seq1; <a href="/dbget-bin/www_bget?ko:K00430">K00430</a>  E1.11.1.7; peroxidase [EC:1.11.1.7]
D      comp53012_c0_seq2; <a href="/dbget-bin/www_bget?ko:K00430">K00430</a>  E1.11.1.7; peroxidase [EC:1.11.1.7]
D      comp53238_c0_seq2; <a href="/dbget-bin/www_bget?ko:K00430">K00430</a>  E1.11.1.7; peroxidase [EC:1.11.1.7]
D      comp54569_c0_seq2; <a href="/dbget-bin/www_bget?ko:K00430">K00430</a>  E1.11.1.7; peroxidase [EC:1.11.1.7]
D      comp55820_c0_seq1; <a href="/dbget-bin/www_bget?ko:K00430">K00430</a>  E1.11.1.7; peroxidase [EC:1.11.1.7]
D      comp55992_c0_seq3; <a href="/dbget-bin/www_bget?ko:K00430">K00430</a>  E1.11.1.7; peroxidase [EC:1.11.1.7]
D      comp56861_c0_seq2; <a href="/dbget-bin/www_bget?ko:K00430">K00430</a>  E1.11.1.7; peroxidase [EC:1.11.1.7]
D      comp59289_c1_seq1; <a href="/dbget-bin/www_bget?ko:K00430">K00430</a>  E1.11.1.7; peroxidase [EC:1.11.1.7]
D      comp56396_c1_seq4; <a href="/dbget-bin/www_bget?ko:K10775">K10775</a>  E4.3.1.24; phenylalanine ammonia-lyase [EC:4.3.1.24]
D      comp56960_c0_seq4; <a href="/dbget-bin/www_bget?ko:K00487">K00487</a>  CYP73A; trans-cinnamate 4-monooxygenase [EC:1.14.13.11]
D      comp136573_c0_seq1; <a href="/dbget-bin/www_bget?ko:K00487">K00487</a>  CYP73A; trans-cinnamate 4-monooxygenase [EC:1.14.13.11]
D      comp49103_c0_seq1; <a href="/dbget-bin/www_bget?ko:K01904">K01904</a>  E6.2.1.12; 4-coumarate--CoA ligase [EC:6.2.1.12]
D      comp52962_c0_seq1; <a href="/dbget-bin/www_bget?ko:K01904">K01904</a>  E6.2.1.12; 4-coumarate--CoA ligase [EC:6.2.1.12]
D      comp55330_c0_seq3; <a href="/dbget-bin/www_bget?ko:K01904">K01904</a>  E6.2.1.12; 4-coumarate--CoA ligase [EC:6.2.1.12]
D      comp58010_c0_seq1; <a href="/dbget-bin/www_bget?ko:K01904">K01904</a>  E6.2.1.12; 4-coumarate--CoA ligase [EC:6.2.1.12]
D      comp59299_c0_seq10; <a href="/dbget-bin/www_bget?ko:K01904">K01904</a>  E6.2.1.12; 4-coumarate--CoA ligase [EC:6.2.1.12]
D      comp38729_c0_seq1; <a href="/dbget-bin/www_bget?ko:K00588">K00588</a>  E2.1.1.104; caffeoyl-CoA O-methyltransferase [EC:2.1.1.104]
D      comp43261_c0_seq1; <a href="/dbget-bin/www_bget?ko:K00588">K00588</a>  E2.1.1.104; caffeoyl-CoA O-methyltransferase [EC:2.1.1.104]
D      comp48635_c0_seq1; <a href="/dbget-bin/www_bget?ko:K00588">K00588</a>  E2.1.1.104; caffeoyl-CoA O-methyltransferase [EC:2.1.1.104]
C    00380 Tryptophan metabolism [PATH:<a href="http://www.kegg.jp/kegg-bin/show_pathway?@ko00380/K00164/K00626/K00128/K14085/K11812/K11816/K16903/K11818/K03781">ko00380</a>]
D      comp54468_c0_seq1; <a href="/dbget-bin/www_bget?ko:K00164">K00164</a>  OGDH, sucA; 2-oxoglutarate dehydrogenase E1 component [EC:1.2.4.2]
D      comp55836_c0_seq2; <a href="/dbget-bin/www_bget?ko:K00626">K00626</a>  E2.3.1.9, atoB; acetyl-CoA C-acetyltransferase [EC:2.3.1.9]
D      comp58238_c0_seq1; <a href="/dbget-bin/www_bget?ko:K00626">K00626</a>  E2.3.1.9, atoB; acetyl-CoA C-acetyltransferase [EC:2.3.1.9]
D      comp44038_c0_seq3; <a href="/dbget-bin/www_bget?ko:K00128">K00128</a>  E1.2.1.3; aldehyde dehydrogenase (NAD+) [EC:1.2.1.3]
D      comp44097_c0_seq4; <a href="/dbget-bin/www_bget?ko:K00128">K00128</a>  E1.2.1.3; aldehyde dehydrogenase (NAD+) [EC:1.2.1.3]
D      comp49751_c0_seq2; <a href="/dbget-bin/www_bget?ko:K00128">K00128</a>  E1.2.1.3; aldehyde dehydrogenase (NAD+) [EC:1.2.1.3]
D      comp58228_c0_seq4; <a href="/dbget-bin/www_bget?ko:K00128">K00128</a>  E1.2.1.3; aldehyde dehydrogenase (NAD+) [EC:1.2.1.3]
D      comp58879_c2_seq1; <a href="/dbget-bin/www_bget?ko:K00128">K00128</a>  E1.2.1.3; aldehyde dehydrogenase (NAD+) [EC:1.2.1.3]
D      comp59070_c0_seq1; <a href="/dbget-bin/www_bget?ko:K14085">K14085</a>  ALDH7A1; aldehyde dehydrogenase family 7 member A1 [EC:1.2.1.31 1.2.1.8 1.2.1.3]
D      comp142585_c0_seq1; <a href="/dbget-bin/www_bget?ko:K11812">K11812</a>  CYP79B2; cytochrome P450, family 79, subfamily B, polypeptide 2 (tryptophan N-monooxygenase) [EC:1.14.13.125]
D      comp50458_c0_seq1; <a href="/dbget-bin/www_bget?ko:K11816">K11816</a>  YUCCA; indole-3-pyruvate monooxygenase [EC:1.14.13.168]
D      comp50502_c0_seq2; <a href="/dbget-bin/www_bget?ko:K11816">K11816</a>  YUCCA; indole-3-pyruvate monooxygenase [EC:1.14.13.168]
D      comp52464_c0_seq1; <a href="/dbget-bin/www_bget?ko:K11816">K11816</a>  YUCCA; indole-3-pyruvate monooxygenase [EC:1.14.13.168]
D      comp53498_c0_seq3; <a href="/dbget-bin/www_bget?ko:K11816">K11816</a>  YUCCA; indole-3-pyruvate monooxygenase [EC:1.14.13.168]
D      comp55208_c0_seq2; <a href="/dbget-bin/www_bget?ko:K16903">K16903</a>  TAA1; L-tryptophan---pyruvate aminotransferase [EC:2.6.1.99]
D      comp53580_c0_seq1; <a href="/dbget-bin/www_bget?ko:K11818">K11818</a>  CYP83B1; cytochrome P450, family 83, subfamily B, polypeptide 1 [EC:1.14.-.-]
D      comp57249_c0_seq3; <a href="/dbget-bin/www_bget?ko:K11818">K11818</a>  CYP83B1; cytochrome P450, family 83, subfamily B, polypeptide 1 [EC:1.14.-.-]
D      comp42706_c0_seq1; <a href="/dbget-bin/www_bget?ko:K03781">K03781</a>  katE, CAT, catB, srpA; catalase [EC:1.11.1.6]
C    00400 Phenylalanine, tyrosine and tryptophan biosynthesis [PATH:<a href="http://www.kegg.jp/kegg-bin/show_pathway?@ko00400/K01626/K01735/K13832/K00891/K00800/K01736/K01657/K01658/K00766/K01817/K01609/K01695/K01696/K06001/K01850/K15227/K05359/K14454/K14455/K00811/K15849/K00815/K00817">ko00400</a>]
D      comp54771_c0_seq1; <a href="/dbget-bin/www_bget?ko:K01626">K01626</a>  E2.5.1.54, aroF, aroG, aroH; 3-deoxy-7-phosphoheptulonate synthase [EC:2.5.1.54]
D      comp54209_c0_seq1; <a href="/dbget-bin/www_bget?ko:K01735">K01735</a>  aroB; 3-dehydroquinate synthase [EC:4.2.3.4]
D      comp58133_c0_seq2; <a href="/dbget-bin/www_bget?ko:K13832">K13832</a>  aroDE, DHQ-SDH; 3-dehydroquinate dehydratase / shikimate dehydrogenase [EC:4.2.1.10 1.1.1.25]
D      comp56668_c0_seq18; <a href="/dbget-bin/www_bget?ko:K00891">K00891</a>  E2.7.1.71, aroK, aroL; shikimate kinase [EC:2.7.1.71]
D      comp55335_c0_seq2; <a href="/dbget-bin/www_bget?ko:K00800">K00800</a>  aroA; 3-phosphoshikimate 1-carboxyvinyltransferase [EC:2.5.1.19]
D      comp57716_c0_seq1; <a href="/dbget-bin/www_bget?ko:K01736">K01736</a>  aroC; chorismate synthase [EC:4.2.3.5]
D      comp51298_c0_seq5; <a href="/dbget-bin/www_bget?ko:K01657">K01657</a>  trpE; anthranilate synthase component I [EC:4.1.3.27]
D      comp33019_c0_seq1; <a href="/dbget-bin/www_bget?ko:K01658">K01658</a>  trpG; anthranilate synthase component II [EC:4.1.3.27]
D      comp53087_c0_seq7; <a href="/dbget-bin/www_bget?ko:K00766">K00766</a>  trpD; anthranilate phosphoribosyltransferase [EC:2.4.2.18]
D      comp52357_c0_seq2; <a href="/dbget-bin/www_bget?ko:K01817">K01817</a>  trpF; phosphoribosylanthranilate isomerase [EC:5.3.1.24]
D      comp54728_c0_seq1; <a href="/dbget-bin/www_bget?ko:K01609">K01609</a>  trpC; indole-3-glycerol phosphate synthase [EC:4.1.1.48]
D      comp56458_c0_seq5; <a href="/dbget-bin/www_bget?ko:K01695">K01695</a>  trpA; tryptophan synthase alpha chain [EC:4.2.1.20]
D      comp43357_c0_seq1; <a href="/dbget-bin/www_bget?ko:K01696">K01696</a>  trpB; tryptophan synthase beta chain [EC:4.2.1.20]
D      comp56917_c0_seq1; <a href="/dbget-bin/www_bget?ko:K01696">K01696</a>  trpB; tryptophan synthase beta chain [EC:4.2.1.20]
D      comp57377_c1_seq1; <a href="/dbget-bin/www_bget?ko:K06001">K06001</a>  K06001, trpB; tryptophan synthase beta chain [EC:4.2.1.20]
D      comp53023_c0_seq3; <a href="/dbget-bin/www_bget?ko:K01850">K01850</a>  E5.4.99.5; chorismate mutase [EC:5.4.99.5]
D      comp55862_c0_seq2; <a href="/dbget-bin/www_bget?ko:K01850">K01850</a>  E5.4.99.5; chorismate mutase [EC:5.4.99.5]
D      comp57727_c0_seq3; <a href="/dbget-bin/www_bget?ko:K15227">K15227</a>  TYRAAT; arogenate dehydrogenase (NADP+), plant [EC:1.3.1.78]
D      comp55044_c0_seq1; <a href="/dbget-bin/www_bget?ko:K05359">K05359</a>  ADT, PDT; arogenate/prephenate dehydratase [EC:4.2.1.91 4.2.1.51]
D      comp55645_c0_seq2; <a href="/dbget-bin/www_bget?ko:K05359">K05359</a>  ADT, PDT; arogenate/prephenate dehydratase [EC:4.2.1.91 4.2.1.51]
D      comp58304_c0_seq5; <a href="/dbget-bin/www_bget?ko:K05359">K05359</a>  ADT, PDT; arogenate/prephenate dehydratase [EC:4.2.1.91 4.2.1.51]
D      comp44326_c0_seq1; <a href="/dbget-bin/www_bget?ko:K14454">K14454</a>  GOT1; aspartate aminotransferase, cytoplasmic [EC:2.6.1.1]
D      comp52813_c2_seq3; <a href="/dbget-bin/www_bget?ko:K14455">K14455</a>  GOT2; aspartate aminotransferase, mitochondrial [EC:2.6.1.1]
D      comp41956_c0_seq1; <a href="/dbget-bin/www_bget?ko:K00811">K00811</a>  ASP5; aspartate aminotransferase, chloroplastic [EC:2.6.1.1]
D      comp59013_c0_seq9; <a href="/dbget-bin/www_bget?ko:K15849">K15849</a>  PAT, AAT; bifunctional aspartate aminotransferase and glutamate/aspartate-prephenate aminotransferase [EC:2.6.1.1 2.6.1.78 2.6.1.79]
D      comp47482_c0_seq4; <a href="/dbget-bin/www_bget?ko:K00815">K00815</a>  TAT; tyrosine aminotransferase [EC:2.6.1.5]
D      comp52735_c0_seq3; <a href="/dbget-bin/www_bget?ko:K00815">K00815</a>  TAT; tyrosine aminotransferase [EC:2.6.1.5]
D      comp57622_c0_seq1; <a href="/dbget-bin/www_bget?ko:K00817">K00817</a>  hisC; histidinol-phosphate aminotransferase [EC:2.6.1.9]
C    01007 Amino acid related enzymes [BR:ko01007]
B
B  <b>Metabolism of other amino acids</b>
C    00410 beta-Alanine metabolism [PATH:<a href="http://www.kegg.jp/kegg-bin/show_pathway?@ko00410/K01580/K00797/K00276/K00128/K14085/K01918/K00207/K01464/K01431/K05605/K00249/K01578/K00140">ko00410</a>]
D      comp56656_c0_seq1; <a href="/dbget-bin/www_bget?ko:K01580">K01580</a>  E4.1.1.15, gadB, gadA, GAD; glutamate decarboxylase [EC:4.1.1.15]
D      comp45904_c0_seq1; <a href="/dbget-bin/www_bget?ko:K00797">K00797</a>  speE, SRM; spermidine synthase [EC:2.5.1.16]
D      comp57184_c0_seq2; <a href="/dbget-bin/www_bget?ko:K00797">K00797</a>  speE, SRM; spermidine synthase [EC:2.5.1.16]
D      comp57912_c3_seq1; <a href="/dbget-bin/www_bget?ko:K00797">K00797</a>  speE, SRM; spermidine synthase [EC:2.5.1.16]
D      comp59824_c3_seq3; <a href="/dbget-bin/www_bget?ko:K00276">K00276</a>  E1.4.3.21, AOC2, AOC3, tynA; primary-amine oxidase [EC:1.4.3.21]
D      comp44038_c0_seq3; <a href="/dbget-bin/www_bget?ko:K00128">K00128</a>  E1.2.1.3; aldehyde dehydrogenase (NAD+) [EC:1.2.1.3]
D      comp44097_c0_seq4; <a href="/dbget-bin/www_bget?ko:K00128">K00128</a>  E1.2.1.3; aldehyde dehydrogenase (NAD+) [EC:1.2.1.3]
D      comp49751_c0_seq2; <a href="/dbget-bin/www_bget?ko:K00128">K00128</a>  E1.2.1.3; aldehyde dehydrogenase (NAD+) [EC:1.2.1.3]
D      comp58228_c0_seq4; <a href="/dbget-bin/www_bget?ko:K00128">K00128</a>  E1.2.1.3; aldehyde dehydrogenase (NAD+) [EC:1.2.1.3]
D      comp58879_c2_seq1; <a href="/dbget-bin/www_bget?ko:K00128">K00128</a>  E1.2.1.3; aldehyde dehydrogenase (NAD+) [EC:1.2.1.3]
D      comp59070_c0_seq1; <a href="/dbget-bin/www_bget?ko:K14085">K14085</a>  ALDH7A1; aldehyde dehydrogenase family 7 member A1 [EC:1.2.1.31 1.2.1.8 1.2.1.3]
D      comp50561_c0_seq1; <a href="/dbget-bin/www_bget?ko:K01918">K01918</a>  panC; pantoate--beta-alanine ligase [EC:6.3.2.1]
D      comp53329_c0_seq1; <a href="/dbget-bin/www_bget?ko:K00207">K00207</a>  E1.3.1.2, DPYD; dihydropyrimidine dehydrogenase (NADP+) [EC:1.3.1.2]
D      comp53976_c0_seq1; <a href="/dbget-bin/www_bget?ko:K01464">K01464</a>  E3.5.2.2, DPYS; dihydropyrimidinase [EC:3.5.2.2]
D      comp53447_c0_seq1; <a href="/dbget-bin/www_bget?ko:K01431">K01431</a>  E3.5.1.6; beta-ureidopropionase [EC:3.5.1.6]
D      comp27635_c0_seq2; <a href="/dbget-bin/www_bget?ko:K05605">K05605</a>  HIBCH; 3-hydroxyisobutyryl-CoA hydrolase [EC:3.1.2.4]
D      comp52137_c0_seq1; <a href="/dbget-bin/www_bget?ko:K05605">K05605</a>  HIBCH; 3-hydroxyisobutyryl-CoA hydrolase [EC:3.1.2.4]
D      comp55025_c0_seq1; <a href="/dbget-bin/www_bget?ko:K05605">K05605</a>  HIBCH; 3-hydroxyisobutyryl-CoA hydrolase [EC:3.1.2.4]
D      comp47886_c1_seq1; <a href="/dbget-bin/www_bget?ko:K00249">K00249</a>  ACADM, acd; acyl-CoA dehydrogenase [EC:1.3.8.7]
D      comp53570_c0_seq5; <a href="/dbget-bin/www_bget?ko:K01578">K01578</a>  E4.1.1.9, MLYCD; malonyl-CoA decarboxylase [EC:4.1.1.9]
D      comp57326_c0_seq2; <a href="/dbget-bin/www_bget?ko:K00140">K00140</a>  mmsA, iolA, ALDH6A1; malonate-semialdehyde dehydrogenase (acetylating) / methylmalonate-semialdehyde dehydrogenase [EC:1.2.1.18 1.2.1.27]
C    00430 Taurine and hypotaurine metabolism [PATH:<a href="http://www.kegg.jp/kegg-bin/show_pathway?@ko00430/K01580/K10712/K00681">ko00430</a>]
D      comp56656_c0_seq1; <a href="/dbget-bin/www_bget?ko:K01580">K01580</a>  E4.1.1.15, gadB, gadA, GAD; glutamate decarboxylase [EC:4.1.1.15]
D      comp45083_c0_seq1; <a href="/dbget-bin/www_bget?ko:K10712">K10712</a>  ADO; cysteamine dioxygenase [EC:1.13.11.19]
D      comp55383_c0_seq1; <a href="/dbget-bin/www_bget?ko:K10712">K10712</a>  ADO; cysteamine dioxygenase [EC:1.13.11.19]
D      comp52867_c1_seq4; <a href="/dbget-bin/www_bget?ko:K00681">K00681</a>  ggt; gamma-glutamyltranspeptidase [EC:2.3.2.2]
C    00440 Phosphonate and phosphinate metabolism [PATH:<a href="http://www.kegg.jp/kegg-bin/show_pathway?@ko00440/K00967/K00993/K00968">ko00440</a>]
D      comp57318_c0_seq1; <a href="/dbget-bin/www_bget?ko:K00967">K00967</a>  PCYT2; ethanolamine-phosphate cytidylyltransferase [EC:2.7.7.14]
D      comp64192_c0_seq1; <a href="/dbget-bin/www_bget?ko:K00967">K00967</a>  PCYT2; ethanolamine-phosphate cytidylyltransferase [EC:2.7.7.14]
D      comp57844_c0_seq2; <a href="/dbget-bin/www_bget?ko:K00993">K00993</a>  EPT1; ethanolaminephosphotransferase [EC:2.7.8.1]
D      comp53687_c0_seq1; <a href="/dbget-bin/www_bget?ko:K00968">K00968</a>  PCYT1; choline-phosphate cytidylyltransferase [EC:2.7.7.15]
D      comp55428_c0_seq1; <a href="/dbget-bin/www_bget?ko:K00968">K00968</a>  PCYT1; choline-phosphate cytidylyltransferase [EC:2.7.7.15]
C    00450 Selenocompound metabolism [PATH:<a href="http://www.kegg.jp/kegg-bin/show_pathway?@ko00450/K01739/K01760/K00549/K01761/K11717/K08247/K00384/K13811/K01874">ko00450</a>]
D      comp57840_c0_seq1; <a href="/dbget-bin/www_bget?ko:K01739">K01739</a>  metB; cystathionine gamma-synthase [EC:2.5.1.48]
D      comp58813_c0_seq9; <a href="/dbget-bin/www_bget?ko:K01760">K01760</a>  metC; cystathionine beta-lyase [EC:4.4.1.8]
D      comp59437_c0_seq5; <a href="/dbget-bin/www_bget?ko:K00549">K00549</a>  metE; 5-methyltetrahydropteroyltriglutamate--homocysteine methyltransferase [EC:2.1.1.14]
D      comp53680_c1_seq2; <a href="/dbget-bin/www_bget?ko:K01761">K01761</a>  E4.4.1.11; methionine-gamma-lyase [EC:4.4.1.11]
D      comp51941_c0_seq17; <a href="/dbget-bin/www_bget?ko:K11717">K11717</a>  sufS; cysteine desulfurase / selenocysteine lyase [EC:2.8.1.7 4.4.1.16]
D      comp54582_c0_seq1; <a href="/dbget-bin/www_bget?ko:K08247">K08247</a>  E2.1.1.12; methionine S-methyltransferase [EC:2.1.1.12]
D      comp47906_c0_seq1; <a href="/dbget-bin/www_bget?ko:K00384">K00384</a>  E1.8.1.9, trxB; thioredoxin reductase (NADPH) [EC:1.8.1.9]
D      comp56357_c0_seq1; <a href="/dbget-bin/www_bget?ko:K00384">K00384</a>  E1.8.1.9, trxB; thioredoxin reductase (NADPH) [EC:1.8.1.9]
D      comp52621_c0_seq3; <a href="/dbget-bin/www_bget?ko:K13811">K13811</a>  PAPSS; 3'-phosphoadenosine 5'-phosphosulfate synthase [EC:2.7.7.4 2.7.1.25]
D      comp58171_c1_seq1; <a href="/dbget-bin/www_bget?ko:K13811">K13811</a>  PAPSS; 3'-phosphoadenosine 5'-phosphosulfate synthase [EC:2.7.7.4 2.7.1.25]
D      comp55912_c1_seq3; <a href="/dbget-bin/www_bget?ko:K01874">K01874</a>  MARS, metG; methionyl-tRNA synthetase [EC:6.1.1.10]
D      comp59962_c1_seq1; <a href="/dbget-bin/www_bget?ko:K01874">K01874</a>  MARS, metG; methionyl-tRNA synthetase [EC:6.1.1.10]
C    00460 Cyanoamino acid metabolism [PATH:<a href="http://www.kegg.jp/kegg-bin/show_pathway?@ko00460/K01188/K05349/K05350/K13034/K00681/K13035/K00600">ko00460</a>]
D      comp27577_c0_seq1; <a href="/dbget-bin/www_bget?ko:K01188">K01188</a>  E3.2.1.21; beta-glucosidase [EC:3.2.1.21]
D      comp47947_c0_seq4; <a href="/dbget-bin/www_bget?ko:K01188">K01188</a>  E3.2.1.21; beta-glucosidase [EC:3.2.1.21]
D      comp49777_c0_seq4; <a href="/dbget-bin/www_bget?ko:K01188">K01188</a>  E3.2.1.21; beta-glucosidase [EC:3.2.1.21]
D      comp51328_c0_seq2; <a href="/dbget-bin/www_bget?ko:K01188">K01188</a>  E3.2.1.21; beta-glucosidase [EC:3.2.1.21]
D      comp51453_c0_seq2; <a href="/dbget-bin/www_bget?ko:K01188">K01188</a>  E3.2.1.21; beta-glucosidase [EC:3.2.1.21]
D      comp54563_c0_seq1; <a href="/dbget-bin/www_bget?ko:K01188">K01188</a>  E3.2.1.21; beta-glucosidase [EC:3.2.1.21]
D      comp55414_c0_seq17; <a href="/dbget-bin/www_bget?ko:K01188">K01188</a>  E3.2.1.21; beta-glucosidase [EC:3.2.1.21]
D      comp57588_c2_seq3; <a href="/dbget-bin/www_bget?ko:K01188">K01188</a>  E3.2.1.21; beta-glucosidase [EC:3.2.1.21]
D      comp58384_c0_seq10; <a href="/dbget-bin/www_bget?ko:K01188">K01188</a>  E3.2.1.21; beta-glucosidase [EC:3.2.1.21]
D      comp51037_c0_seq1; <a href="/dbget-bin/www_bget?ko:K05349">K05349</a>  bglX; beta-glucosidase [EC:3.2.1.21]
D      comp58288_c0_seq8; <a href="/dbget-bin/www_bget?ko:K05349">K05349</a>  bglX; beta-glucosidase [EC:3.2.1.21]
D      comp58969_c0_seq2; <a href="/dbget-bin/www_bget?ko:K05349">K05349</a>  bglX; beta-glucosidase [EC:3.2.1.21]
D      comp59623_c0_seq5; <a href="/dbget-bin/www_bget?ko:K05349">K05349</a>  bglX; beta-glucosidase [EC:3.2.1.21]
D      comp51564_c0_seq4; <a href="/dbget-bin/www_bget?ko:K05350">K05350</a>  bglB; beta-glucosidase [EC:3.2.1.21]
D      comp52535_c0_seq10; <a href="/dbget-bin/www_bget?ko:K05350">K05350</a>  bglB; beta-glucosidase [EC:3.2.1.21]
D      comp55523_c0_seq1; <a href="/dbget-bin/www_bget?ko:K05350">K05350</a>  bglB; beta-glucosidase [EC:3.2.1.21]
D      comp47308_c0_seq2; <a href="/dbget-bin/www_bget?ko:K13034">K13034</a>  ATCYSC1; L-3-cyanoalanine synthase/ cysteine synthase [EC:2.5.1.47 4.4.1.9]
D      comp52867_c1_seq4; <a href="/dbget-bin/www_bget?ko:K00681">K00681</a>  ggt; gamma-glutamyltranspeptidase [EC:2.3.2.2]
D      comp43890_c0_seq1; <a href="/dbget-bin/www_bget?ko:K13035">K13035</a>  NIT4; beta-cyano-L-alanine hydratase/nitrilase [EC:3.5.5.1 3.5.5.4]
D      comp54510_c0_seq1; <a href="/dbget-bin/www_bget?ko:K00600">K00600</a>  glyA, SHMT; glycine hydroxymethyltransferase [EC:2.1.2.1]
D      comp56200_c0_seq1; <a href="/dbget-bin/www_bget?ko:K00600">K00600</a>  glyA, SHMT; glycine hydroxymethyltransferase [EC:2.1.2.1]
D      comp56514_c0_seq1; <a href="/dbget-bin/www_bget?ko:K00600">K00600</a>  glyA, SHMT; glycine hydroxymethyltransferase [EC:2.1.2.1]
D      comp58011_c1_seq1; <a href="/dbget-bin/www_bget?ko:K00600">K00600</a>  glyA, SHMT; glycine hydroxymethyltransferase [EC:2.1.2.1]
C    00471 D-Glutamine and D-glutamate metabolism [PATH:<a href="http://www.kegg.jp/kegg-bin/show_pathway?@ko00471/K00261">ko00471</a>]
D      comp58351_c0_seq1; <a href="/dbget-bin/www_bget?ko:K00261">K00261</a>  GLUD1_2, gdhA; glutamate dehydrogenase (NAD(P)+) [EC:1.4.1.3]
D      comp59273_c0_seq2; <a href="/dbget-bin/www_bget?ko:K00261">K00261</a>  GLUD1_2, gdhA; glutamate dehydrogenase (NAD(P)+) [EC:1.4.1.3]
C    00472 D-Arginine and D-ornithine metabolism [PATH:<a href="http://www.kegg.jp/kegg-bin/show_pathway?@ko00472">ko00472</a>]
C    00473 D-Alanine metabolism [PATH:<a href="http://www.kegg.jp/kegg-bin/show_pathway?@ko00473">ko00473</a>]
C    00480 Glutathione metabolism [PATH:<a href="http://www.kegg.jp/kegg-bin/show_pathway?@ko00480/K00681/K01469/K01919/K01920/K01255/K01256/K00799/K00383/K00031/K00033/K00036/K00432/K01581/K00797/K00434/K10807/K10808">ko00480</a>]
D      comp52867_c1_seq4; <a href="/dbget-bin/www_bget?ko:K00681">K00681</a>  ggt; gamma-glutamyltranspeptidase [EC:2.3.2.2]
D      comp56259_c0_seq1; <a href="/dbget-bin/www_bget?ko:K01469">K01469</a>  E3.5.2.9; 5-oxoprolinase (ATP-hydrolysing) [EC:3.5.2.9]
D      comp58729_c2_seq23; <a href="/dbget-bin/www_bget?ko:K01919">K01919</a>  gshA; glutamate--cysteine ligase [EC:6.3.2.2]
D      comp40442_c1_seq2; <a href="/dbget-bin/www_bget?ko:K01920">K01920</a>  E6.3.2.3, gshB; glutathione synthase [EC:6.3.2.3]
D      comp58865_c0_seq2; <a href="/dbget-bin/www_bget?ko:K01255">K01255</a>  CARP, pepA; leucyl aminopeptidase [EC:3.4.11.1]
D      comp59685_c0_seq8; <a href="/dbget-bin/www_bget?ko:K01256">K01256</a>  pepN; aminopeptidase N [EC:3.4.11.2]
D      comp31881_c0_seq1; <a href="/dbget-bin/www_bget?ko:K00799">K00799</a>  GST, gst; glutathione S-transferase [EC:2.5.1.18]
D      comp42091_c0_seq1; <a href="/dbget-bin/www_bget?ko:K00799">K00799</a>  GST, gst; glutathione S-transferase [EC:2.5.1.18]
D      comp43335_c0_seq2; <a href="/dbget-bin/www_bget?ko:K00799">K00799</a>  GST, gst; glutathione S-transferase [EC:2.5.1.18]
D      comp43762_c0_seq1; <a href="/dbget-bin/www_bget?ko:K00799">K00799</a>  GST, gst; glutathione S-transferase [EC:2.5.1.18]
D      comp43837_c0_seq2; <a href="/dbget-bin/www_bget?ko:K00799">K00799</a>  GST, gst; glutathione S-transferase [EC:2.5.1.18]
D      comp43932_c0_seq1; <a href="/dbget-bin/www_bget?ko:K00799">K00799</a>  GST, gst; glutathione S-transferase [EC:2.5.1.18]
D      comp46547_c0_seq1; <a href="/dbget-bin/www_bget?ko:K00799">K00799</a>  GST, gst; glutathione S-transferase [EC:2.5.1.18]
D      comp48153_c0_seq1; <a href="/dbget-bin/www_bget?ko:K00799">K00799</a>  GST, gst; glutathione S-transferase [EC:2.5.1.18]
D      comp49146_c0_seq1; <a href="/dbget-bin/www_bget?ko:K00799">K00799</a>  GST, gst; glutathione S-transferase [EC:2.5.1.18]
D      comp49265_c0_seq3; <a href="/dbget-bin/www_bget?ko:K00799">K00799</a>  GST, gst; glutathione S-transferase [EC:2.5.1.18]
D      comp50427_c1_seq2; <a href="/dbget-bin/www_bget?ko:K00799">K00799</a>  GST, gst; glutathione S-transferase [EC:2.5.1.18]
D      comp50479_c0_seq1; <a href="/dbget-bin/www_bget?ko:K00799">K00799</a>  GST, gst; glutathione S-transferase [EC:2.5.1.18]
D      comp53513_c0_seq3; <a href="/dbget-bin/www_bget?ko:K00799">K00799</a>  GST, gst; glutathione S-transferase [EC:2.5.1.18]
D      comp54022_c0_seq1; <a href="/dbget-bin/www_bget?ko:K00799">K00799</a>  GST, gst; glutathione S-transferase [EC:2.5.1.18]
D      comp56464_c0_seq9; <a href="/dbget-bin/www_bget?ko:K00799">K00799</a>  GST, gst; glutathione S-transferase [EC:2.5.1.18]
D      comp58190_c0_seq6; <a href="/dbget-bin/www_bget?ko:K00799">K00799</a>  GST, gst; glutathione S-transferase [EC:2.5.1.18]
D      comp59444_c0_seq4; <a href="/dbget-bin/www_bget?ko:K00799">K00799</a>  GST, gst; glutathione S-transferase [EC:2.5.1.18]
D      comp54017_c0_seq1; <a href="/dbget-bin/www_bget?ko:K00383">K00383</a>  E1.8.1.7, GSR, gor; glutathione reductase (NADPH) [EC:1.8.1.7]
D      comp57960_c1_seq6; <a href="/dbget-bin/www_bget?ko:K00383">K00383</a>  E1.8.1.7, GSR, gor; glutathione reductase (NADPH) [EC:1.8.1.7]
D      comp49786_c0_seq1; <a href="/dbget-bin/www_bget?ko:K00031">K00031</a>  IDH1, IDH2, icd; isocitrate dehydrogenase [EC:1.1.1.42]
D      comp52337_c0_seq1; <a href="/dbget-bin/www_bget?ko:K00031">K00031</a>  IDH1, IDH2, icd; isocitrate dehydrogenase [EC:1.1.1.42]
D      comp54557_c0_seq1; <a href="/dbget-bin/www_bget?ko:K00033">K00033</a>  E1.1.1.44, PGD, gnd; 6-phosphogluconate dehydrogenase [EC:1.1.1.44]
D      comp56026_c0_seq1; <a href="/dbget-bin/www_bget?ko:K00033">K00033</a>  E1.1.1.44, PGD, gnd; 6-phosphogluconate dehydrogenase [EC:1.1.1.44]
D      comp44095_c0_seq1; <a href="/dbget-bin/www_bget?ko:K00036">K00036</a>  G6PD, zwf; glucose-6-phosphate 1-dehydrogenase [EC:1.1.1.49]
D      comp55231_c0_seq2; <a href="/dbget-bin/www_bget?ko:K00036">K00036</a>  G6PD, zwf; glucose-6-phosphate 1-dehydrogenase [EC:1.1.1.49]
D      comp57069_c0_seq3; <a href="/dbget-bin/www_bget?ko:K00036">K00036</a>  G6PD, zwf; glucose-6-phosphate 1-dehydrogenase [EC:1.1.1.49]
D      comp46529_c0_seq1; <a href="/dbget-bin/www_bget?ko:K00432">K00432</a>  E1.11.1.9; glutathione peroxidase [EC:1.11.1.9]
D      comp47915_c0_seq1; <a href="/dbget-bin/www_bget?ko:K00432">K00432</a>  E1.11.1.9; glutathione peroxidase [EC:1.11.1.9]
D      comp47977_c0_seq1; <a href="/dbget-bin/www_bget?ko:K00432">K00432</a>  E1.11.1.9; glutathione peroxidase [EC:1.11.1.9]
D      comp50121_c0_seq1; <a href="/dbget-bin/www_bget?ko:K00432">K00432</a>  E1.11.1.9; glutathione peroxidase [EC:1.11.1.9]
D      comp55386_c0_seq34; <a href="/dbget-bin/www_bget?ko:K00432">K00432</a>  E1.11.1.9; glutathione peroxidase [EC:1.11.1.9]
D      comp47728_c0_seq1; <a href="/dbget-bin/www_bget?ko:K01581">K01581</a>  E4.1.1.17, ODC1, speC, speF; ornithine decarboxylase [EC:4.1.1.17]
D      comp45904_c0_seq1; <a href="/dbget-bin/www_bget?ko:K00797">K00797</a>  speE, SRM; spermidine synthase [EC:2.5.1.16]
D      comp57184_c0_seq2; <a href="/dbget-bin/www_bget?ko:K00797">K00797</a>  speE, SRM; spermidine synthase [EC:2.5.1.16]
D      comp57912_c3_seq1; <a href="/dbget-bin/www_bget?ko:K00797">K00797</a>  speE, SRM; spermidine synthase [EC:2.5.1.16]
D      comp47786_c0_seq1; <a href="/dbget-bin/www_bget?ko:K00434">K00434</a>  E1.11.1.11; L-ascorbate peroxidase [EC:1.11.1.11]
D      comp50626_c0_seq2; <a href="/dbget-bin/www_bget?ko:K00434">K00434</a>  E1.11.1.11; L-ascorbate peroxidase [EC:1.11.1.11]
D      comp51582_c0_seq1; <a href="/dbget-bin/www_bget?ko:K00434">K00434</a>  E1.11.1.11; L-ascorbate peroxidase [EC:1.11.1.11]
D      comp52700_c1_seq3; <a href="/dbget-bin/www_bget?ko:K00434">K00434</a>  E1.11.1.11; L-ascorbate peroxidase [EC:1.11.1.11]
D      comp59438_c1_seq4; <a href="/dbget-bin/www_bget?ko:K00434">K00434</a>  E1.11.1.11; L-ascorbate peroxidase [EC:1.11.1.11]
D      comp58919_c0_seq1; <a href="/dbget-bin/www_bget?ko:K10807">K10807</a>  RRM1; ribonucleoside-diphosphate reductase subunit M1 [EC:1.17.4.1]
D      comp34112_c0_seq1; <a href="/dbget-bin/www_bget?ko:K10808">K10808</a>  RRM2; ribonucleoside-diphosphate reductase subunit M2 [EC:1.17.4.1]
B
B  <b>Glycan biosynthesis and metabolism</b>
C    01003 Glycosyltransferases [BR:ko01003]
C    00510 N-Glycan biosynthesis [PATH:<a href="http://www.kegg.jp/kegg-bin/show_pathway?@ko00510/K00902/K01001/K00729/K00721/K09658/K09659/K03842/K03843/K03844/K06316/K03845/K03846/K03847/K03848/K03849/K03850/K07151/K12666/K12667/K12668/K12669/K12670/K07252/K01228/K05546/K01230/K00726/K01231/K00736/K00737">ko00510</a>]
D      comp59098_c1_seq1; <a href="/dbget-bin/www_bget?ko:K00902">K00902</a>  E2.7.1.108; dolichol kinase [EC:2.7.1.108]
D      comp54296_c0_seq2; <a href="/dbget-bin/www_bget?ko:K01001">K01001</a>  ALG7; UDP-N-acetylglucosamine--dolichyl-phosphate N-acetylglucosaminephosphotransferase [EC:2.7.8.15]
D      comp56532_c0_seq54; <a href="/dbget-bin/www_bget?ko:K00729">K00729</a>  ALG5; dolichyl-phosphate beta-glucosyltransferase [EC:2.4.1.117]
D      comp54140_c0_seq4; <a href="/dbget-bin/www_bget?ko:K00721">K00721</a>  DPM1; dolichol-phosphate mannosyltransferase [EC:2.4.1.83]
D      comp45186_c0_seq1; <a href="/dbget-bin/www_bget?ko:K09658">K09658</a>  DPM2; dolichyl-phosphate mannosyltransferase polypeptide 2, regulatory subunit
D      comp48687_c0_seq7; <a href="/dbget-bin/www_bget?ko:K09659">K09659</a>  DPM3; dolichyl-phosphate mannosyltransferase polypeptide 3
D      comp58937_c0_seq7; <a href="/dbget-bin/www_bget?ko:K03842">K03842</a>  ALG1; beta-1,4-mannosyltransferase [EC:2.4.1.142]
D      comp59420_c0_seq6; <a href="/dbget-bin/www_bget?ko:K03843">K03843</a>  ALG2; alpha-1,3/alpha-1,6-mannosyltransferase [EC:2.4.1.132 2.4.1.257]
D      comp55762_c0_seq1; <a href="/dbget-bin/www_bget?ko:K03844">K03844</a>  ALG11; alpha-1,2-mannosyltransferase [EC:2.4.1.131]
D      comp53494_c0_seq24; <a href="/dbget-bin/www_bget?ko:K06316">K06316</a>  RFT1; oligosaccharidyl-lipid flippase family
D      comp55305_c0_seq13; <a href="/dbget-bin/www_bget?ko:K03845">K03845</a>  ALG3; alpha-1,3-mannosyltransferase [EC:2.4.1.258]
D      comp51696_c0_seq1; <a href="/dbget-bin/www_bget?ko:K03846">K03846</a>  ALG9; alpha-1,2-mannosyltransferase [EC:2.4.1.259 2.4.1.261]
D      comp57490_c1_seq3; <a href="/dbget-bin/www_bget?ko:K03847">K03847</a>  ALG12; alpha-1,6-mannosyltransferase [EC:2.4.1.260]
D      comp55650_c0_seq7; <a href="/dbget-bin/www_bget?ko:K03848">K03848</a>  ALG6; alpha-1,3-glucosyltransferase [EC:2.4.1.267]
D      comp52350_c0_seq1; <a href="/dbget-bin/www_bget?ko:K03849">K03849</a>  ALG8; alpha-1,3-glucosyltransferase [EC:2.4.1.265]
D      comp58994_c2_seq16; <a href="/dbget-bin/www_bget?ko:K03850">K03850</a>  ALG10; alpha-1,2-glucosyltransferase [EC:2.4.1.256]
D      comp59214_c0_seq1; <a href="/dbget-bin/www_bget?ko:K07151">K07151</a>  STT3; dolichyl-diphosphooligosaccharide--protein glycosyltransferase [EC:2.4.99.18]
D      comp59632_c0_seq1; <a href="/dbget-bin/www_bget?ko:K07151">K07151</a>  STT3; dolichyl-diphosphooligosaccharide--protein glycosyltransferase [EC:2.4.99.18]
D      comp50145_c0_seq1; <a href="/dbget-bin/www_bget?ko:K12666">K12666</a>  OST1, RPN1; oligosaccharyltransferase complex subunit alpha (ribophorin I)
D      comp58958_c0_seq2; <a href="/dbget-bin/www_bget?ko:K12667">K12667</a>  SWP1, RPN2; oligosaccharyltransferase complex subunit delta (ribophorin II)
D      comp32606_c0_seq1; <a href="/dbget-bin/www_bget?ko:K12668">K12668</a>  OST2, DAD1; oligosaccharyltransferase complex subunit epsilon
D      comp59074_c1_seq4; <a href="/dbget-bin/www_bget?ko:K12669">K12669</a>  OST3, OST6; oligosaccharyltransferase complex subunit gamma
D      comp47743_c0_seq1; <a href="/dbget-bin/www_bget?ko:K12670">K12670</a>  WBP1; oligosaccharyltransferase complex subunit beta
D      comp52754_c0_seq3; <a href="/dbget-bin/www_bget?ko:K07252">K07252</a>  E3.6.1.43; dolichyldiphosphatase [EC:3.6.1.43]
D      comp57956_c0_seq2; <a href="/dbget-bin/www_bget?ko:K01228">K01228</a>  GCS1; mannosyl-oligosaccharide glucosidase [EC:3.2.1.106]
D      comp55056_c0_seq1; <a href="/dbget-bin/www_bget?ko:K05546">K05546</a>  GANAB; alpha 1,3-glucosidase [EC:3.2.1.84]
D      comp55201_c0_seq1; <a href="/dbget-bin/www_bget?ko:K01230">K01230</a>  MAN1; mannosyl-oligosaccharide alpha-1,2-mannosidase [EC:3.2.1.113]
D      comp56708_c0_seq3; <a href="/dbget-bin/www_bget?ko:K01230">K01230</a>  MAN1; mannosyl-oligosaccharide alpha-1,2-mannosidase [EC:3.2.1.113]
D      comp46805_c0_seq6; <a href="/dbget-bin/www_bget?ko:K00726">K00726</a>  MGAT1; alpha-1,3-mannosyl-glycoprotein beta-1,2-N-acetylglucosaminyltransferase [EC:2.4.1.101]
D      comp58645_c0_seq1; <a href="/dbget-bin/www_bget?ko:K01231">K01231</a>  MAN2; alpha-mannosidase II [EC:3.2.1.114]
D      comp52107_c0_seq1; <a href="/dbget-bin/www_bget?ko:K00736">K00736</a>  MGAT2; alpha-1,6-mannosyl-glycoprotein beta-1,2-N-acetylglucosaminyltransferase [EC:2.4.1.143]
D      comp50133_c0_seq2; <a href="/dbget-bin/www_bget?ko:K00737">K00737</a>  MGAT3; beta-1,4-mannosyl-glycoprotein beta-1,4-N-acetylglucosaminyltransferase [EC:2.4.1.144]
D      comp57729_c0_seq10; <a href="/dbget-bin/www_bget?ko:K00737">K00737</a>  MGAT3; beta-1,4-mannosyl-glycoprotein beta-1,4-N-acetylglucosaminyltransferase [EC:2.4.1.144]
C    00513 Various types of N-glycan biosynthesis [PATH:<a href="http://www.kegg.jp/kegg-bin/show_pathway?@ko00513/K03842/K03843/K03844/K03845/K03846/K03847/K07151/K12666/K12667/K12668/K12669/K12670/K01230/K00726/K01231/K00736/K03714/K00753/K14413">ko00513</a>]
D      comp58937_c0_seq7; <a href="/dbget-bin/www_bget?ko:K03842">K03842</a>  ALG1; beta-1,4-mannosyltransferase [EC:2.4.1.142]
D      comp59420_c0_seq6; <a href="/dbget-bin/www_bget?ko:K03843">K03843</a>  ALG2; alpha-1,3/alpha-1,6-mannosyltransferase [EC:2.4.1.132 2.4.1.257]
D      comp55762_c0_seq1; <a href="/dbget-bin/www_bget?ko:K03844">K03844</a>  ALG11; alpha-1,2-mannosyltransferase [EC:2.4.1.131]
D      comp55305_c0_seq13; <a href="/dbget-bin/www_bget?ko:K03845">K03845</a>  ALG3; alpha-1,3-mannosyltransferase [EC:2.4.1.258]
D      comp51696_c0_seq1; <a href="/dbget-bin/www_bget?ko:K03846">K03846</a>  ALG9; alpha-1,2-mannosyltransferase [EC:2.4.1.259 2.4.1.261]
D      comp57490_c1_seq3; <a href="/dbget-bin/www_bget?ko:K03847">K03847</a>  ALG12; alpha-1,6-mannosyltransferase [EC:2.4.1.260]
D      comp59214_c0_seq1; <a href="/dbget-bin/www_bget?ko:K07151">K07151</a>  STT3; dolichyl-diphosphooligosaccharide--protein glycosyltransferase [EC:2.4.99.18]
D      comp59632_c0_seq1; <a href="/dbget-bin/www_bget?ko:K07151">K07151</a>  STT3; dolichyl-diphosphooligosaccharide--protein glycosyltransferase [EC:2.4.99.18]
D      comp50145_c0_seq1; <a href="/dbget-bin/www_bget?ko:K12666">K12666</a>  OST1, RPN1; oligosaccharyltransferase complex subunit alpha (ribophorin I)
D      comp58958_c0_seq2; <a href="/dbget-bin/www_bget?ko:K12667">K12667</a>  SWP1, RPN2; oligosaccharyltransferase complex subunit delta (ribophorin II)
D      comp32606_c0_seq1; <a href="/dbget-bin/www_bget?ko:K12668">K12668</a>  OST2, DAD1; oligosaccharyltransferase complex subunit epsilon
D      comp59074_c1_seq4; <a href="/dbget-bin/www_bget?ko:K12669">K12669</a>  OST3, OST6; oligosaccharyltransferase complex subunit gamma
D      comp47743_c0_seq1; <a href="/dbget-bin/www_bget?ko:K12670">K12670</a>  WBP1; oligosaccharyltransferase complex subunit beta
D      comp55201_c0_seq1; <a href="/dbget-bin/www_bget?ko:K01230">K01230</a>  MAN1; mannosyl-oligosaccharide alpha-1,2-mannosidase [EC:3.2.1.113]
D      comp56708_c0_seq3; <a href="/dbget-bin/www_bget?ko:K01230">K01230</a>  MAN1; mannosyl-oligosaccharide alpha-1,2-mannosidase [EC:3.2.1.113]
D      comp46805_c0_seq6; <a href="/dbget-bin/www_bget?ko:K00726">K00726</a>  MGAT1; alpha-1,3-mannosyl-glycoprotein beta-1,2-N-acetylglucosaminyltransferase [EC:2.4.1.101]
D      comp58645_c0_seq1; <a href="/dbget-bin/www_bget?ko:K01231">K01231</a>  MAN2; alpha-mannosidase II [EC:3.2.1.114]
D      comp52107_c0_seq1; <a href="/dbget-bin/www_bget?ko:K00736">K00736</a>  MGAT2; alpha-1,6-mannosyl-glycoprotein beta-1,2-N-acetylglucosaminyltransferase [EC:2.4.1.143]
D      comp55726_c0_seq1; <a href="/dbget-bin/www_bget?ko:K03714">K03714</a>  E2.4.2.38; glycoprotein 2-beta-D-xylosyltransferase [EC:2.4.2.38]
D      comp56111_c0_seq5; <a href="/dbget-bin/www_bget?ko:K00753">K00753</a>  E2.4.1.214; glycoprotein 3-alpha-L-fucosyltransferase [EC:2.4.1.214]
D      comp59371_c0_seq1; <a href="/dbget-bin/www_bget?ko:K14413">K14413</a>  GALT1; beta-1,3-galactosyltransferase [EC:2.4.1.-]
C    00512 Mucin type O-glycan biosynthesis [PATH:<a href="http://www.kegg.jp/kegg-bin/show_pathway?@ko00512">ko00512</a>]
C    00514 Other types of O-glycan biosynthesis [PATH:<a href="http://www.kegg.jp/kegg-bin/show_pathway?@ko00514/K09667/K03691">ko00514</a>]
D      comp59727_c0_seq1; <a href="/dbget-bin/www_bget?ko:K09667">K09667</a>  OGT; polypeptide N-acetylglucosaminyltransferase [EC:2.4.1.-]
D      comp56205_c0_seq2; <a href="/dbget-bin/www_bget?ko:K03691">K03691</a>  POFUT; peptide-O-fucosyltransferase [EC:2.4.1.221]
C    00532 Glycosaminoglycan biosynthesis - chondroitin sulfate / dermatan sulfate [PATH:<a href="http://www.kegg.jp/kegg-bin/show_pathway?@ko00532">ko00532</a>]
C    00534 Glycosaminoglycan biosynthesis - heparan sulfate / heparin [PATH:<a href="http://www.kegg.jp/kegg-bin/show_pathway?@ko00534">ko00534</a>]
C    00533 Glycosaminoglycan biosynthesis - keratan sulfate [PATH:<a href="http://www.kegg.jp/kegg-bin/show_pathway?@ko00533">ko00533</a>]
C    00535 Proteoglycans [BR:ko00535]
C    00536 Heparan sulfate/heparin binding proteins [BR:ko00536]
C    00531 Glycosaminoglycan degradation [PATH:<a href="http://www.kegg.jp/kegg-bin/show_pathway?@ko00531/K10532/K01205/K12309/K12373">ko00531</a>]
D      comp53211_c0_seq22; <a href="/dbget-bin/www_bget?ko:K10532">K10532</a>  HGSNAT; heparan-alpha-glucosaminide N-acetyltransferase [EC:2.3.1.78]
D      comp49107_c0_seq16; <a href="/dbget-bin/www_bget?ko:K01205">K01205</a>  NAGLU; alpha-N-acetylglucosaminidase [EC:3.2.1.50]
D      comp47567_c0_seq1; <a href="/dbget-bin/www_bget?ko:K12309">K12309</a>  GLB1, ELNR1; beta-galactosidase [EC:3.2.1.23]
D      comp53235_c0_seq2; <a href="/dbget-bin/www_bget?ko:K12373">K12373</a>  HEXA_B; hexosaminidase [EC:3.2.1.52]
D      comp58573_c1_seq2; <a href="/dbget-bin/www_bget?ko:K12373">K12373</a>  HEXA_B; hexosaminidase [EC:3.2.1.52]
C    00563 Glycosylphosphatidylinositol(GPI)-anchor biosynthesis [PATH:<a href="http://www.kegg.jp/kegg-bin/show_pathway?@ko00563/K03857/K03858/K03859/K03860/K03861/K09658/K03434/K05283/K05284/K07541/K07542/K05285/K05286/K05287/K05288/K05289/K05290/K05291/K05292/K05293/K05310">ko00563</a>]
D      comp57498_c0_seq30; <a href="/dbget-bin/www_bget?ko:K03857">K03857</a>  PIGA, GPI3; phosphatidylinositol glycan, class A [EC:2.4.1.198]
D      comp54335_c0_seq15; <a href="/dbget-bin/www_bget?ko:K03858">K03858</a>  PIGH, GPI15; phosphatidylinositol glycan, class H
D      comp50602_c0_seq7; <a href="/dbget-bin/www_bget?ko:K03859">K03859</a>  PIGC, GPI2; phosphatidylinositol glycan, class C
D      comp55529_c1_seq4; <a href="/dbget-bin/www_bget?ko:K03860">K03860</a>  PIGQ, GPI1; phosphatidylinositol glycan, class Q
D      comp55663_c1_seq14; <a href="/dbget-bin/www_bget?ko:K03861">K03861</a>  PIGP, GPI19, DSCR5; phosphatidylinositol glycan, class P
D      comp45186_c0_seq1; <a href="/dbget-bin/www_bget?ko:K09658">K09658</a>  DPM2; dolichyl-phosphate mannosyltransferase polypeptide 2, regulatory subunit
D      comp56659_c2_seq8; <a href="/dbget-bin/www_bget?ko:K03434">K03434</a>  PIGL; N-acetylglucosaminylphosphatidylinositol deacetylase [EC:3.5.1.89]
D      comp57562_c2_seq6; <a href="/dbget-bin/www_bget?ko:K05283">K05283</a>  PIGW; phosphatidylinositol glycan, class W [EC:2.3.-.-]
D      comp50403_c0_seq1; <a href="/dbget-bin/www_bget?ko:K05284">K05284</a>  PIGM; phosphatidylinositol glycan, class M [EC:2.4.1.-]
D      comp57591_c0_seq7; <a href="/dbget-bin/www_bget?ko:K07541">K07541</a>  PIGX; phosphatidylinositol glycan, class X
D      comp51456_c0_seq1; <a href="/dbget-bin/www_bget?ko:K07542">K07542</a>  PIGV; phosphatidylinositol glycan, class V [EC:2.4.1.-]
D      comp56796_c0_seq8; <a href="/dbget-bin/www_bget?ko:K05285">K05285</a>  PIGN; phosphatidylinositol glycan, class N [EC:2.7.-.-]
D      comp58186_c0_seq15; <a href="/dbget-bin/www_bget?ko:K05286">K05286</a>  PIGB; phosphatidylinositol glycan, class B [EC:2.4.1.-]
D      comp57136_c0_seq3; <a href="/dbget-bin/www_bget?ko:K05287">K05287</a>  PIGF; phosphatidylinositol glycan, class F [EC:2.7.-.-]
D      comp59661_c0_seq9; <a href="/dbget-bin/www_bget?ko:K05288">K05288</a>  PIGO; phosphatidylinositol glycan, class O
D      comp59320_c0_seq1; <a href="/dbget-bin/www_bget?ko:K05289">K05289</a>  GAA1; glycosylphosphatidylinositol transamidase
D      comp42653_c0_seq1; <a href="/dbget-bin/www_bget?ko:K05290">K05290</a>  PIGK; phosphatidylinositol glycan, class K [EC:2.6.-.-]
D      comp51429_c0_seq3; <a href="/dbget-bin/www_bget?ko:K05291">K05291</a>  PIGS; phosphatidylinositol glycan, class S
D      comp42439_c0_seq1; <a href="/dbget-bin/www_bget?ko:K05292">K05292</a>  PIGT; phosphatidylinositol glycan, class T
D      comp58114_c4_seq4; <a href="/dbget-bin/www_bget?ko:K05293">K05293</a>  PIGU; phosphatidylinositol glycan, class U
D      comp56792_c0_seq50; <a href="/dbget-bin/www_bget?ko:K05310">K05310</a>  GPI7; ethanolaminephosphotransferase [EC:2.7.-.-]
C    00601 Glycosphingolipid biosynthesis - lacto and neolacto series [PATH:<a href="http://www.kegg.jp/kegg-bin/show_pathway?@ko00601">ko00601</a>]
C    00603 Glycosphingolipid biosynthesis - globo series [PATH:<a href="http://www.kegg.jp/kegg-bin/show_pathway?@ko00603/K01988/K07407/K12373">ko00603</a>]
D      comp23106_c0_seq2; <a href="/dbget-bin/www_bget?ko:K01988">K01988</a>  A4GALT; lactosylceramide 4-alpha-galactosyltransferase [EC:2.4.1.228]
D      comp43052_c0_seq1; <a href="/dbget-bin/www_bget?ko:K01988">K01988</a>  A4GALT; lactosylceramide 4-alpha-galactosyltransferase [EC:2.4.1.228]
D      comp51525_c0_seq1; <a href="/dbget-bin/www_bget?ko:K01988">K01988</a>  A4GALT; lactosylceramide 4-alpha-galactosyltransferase [EC:2.4.1.228]
D      comp43091_c0_seq2; <a href="/dbget-bin/www_bget?ko:K07407">K07407</a>  E3.2.1.22B, galA, rafA; alpha-galactosidase [EC:3.2.1.22]
D      comp54803_c0_seq1; <a href="/dbget-bin/www_bget?ko:K07407">K07407</a>  E3.2.1.22B, galA, rafA; alpha-galactosidase [EC:3.2.1.22]
D      comp56212_c2_seq1; <a href="/dbget-bin/www_bget?ko:K07407">K07407</a>  E3.2.1.22B, galA, rafA; alpha-galactosidase [EC:3.2.1.22]
D      comp53235_c0_seq2; <a href="/dbget-bin/www_bget?ko:K12373">K12373</a>  HEXA_B; hexosaminidase [EC:3.2.1.52]
D      comp58573_c1_seq2; <a href="/dbget-bin/www_bget?ko:K12373">K12373</a>  HEXA_B; hexosaminidase [EC:3.2.1.52]
C    00604 Glycosphingolipid biosynthesis - ganglio series [PATH:<a href="http://www.kegg.jp/kegg-bin/show_pathway?@ko00604/K12309/K12373">ko00604</a>]
D      comp47567_c0_seq1; <a href="/dbget-bin/www_bget?ko:K12309">K12309</a>  GLB1, ELNR1; beta-galactosidase [EC:3.2.1.23]
D      comp53235_c0_seq2; <a href="/dbget-bin/www_bget?ko:K12373">K12373</a>  HEXA_B; hexosaminidase [EC:3.2.1.52]
D      comp58573_c1_seq2; <a href="/dbget-bin/www_bget?ko:K12373">K12373</a>  HEXA_B; hexosaminidase [EC:3.2.1.52]
C    00540 Lipopolysaccharide biosynthesis [PATH:<a href="http://www.kegg.jp/kegg-bin/show_pathway?@ko00540/K00677/K02535/K00748/K01627/K00979/K02527">ko00540</a>]
D      comp55052_c0_seq31; <a href="/dbget-bin/www_bget?ko:K00677">K00677</a>  lpxA; UDP-N-acetylglucosamine acyltransferase [EC:2.3.1.129]
D      comp55245_c0_seq1; <a href="/dbget-bin/www_bget?ko:K02535">K02535</a>  lpxC; UDP-3-O-[3-hydroxymyristoyl] N-acetylglucosamine deacetylase [EC:3.5.1.108]
D      comp59546_c1_seq8; <a href="/dbget-bin/www_bget?ko:K00748">K00748</a>  lpxB; lipid-A-disaccharide synthase [EC:2.4.1.182]
D      comp52627_c0_seq2; <a href="/dbget-bin/www_bget?ko:K01627">K01627</a>  kdsA; 2-dehydro-3-deoxyphosphooctonate aldolase (KDO 8-P synthase) [EC:2.5.1.55]
D      comp51670_c1_seq1; <a href="/dbget-bin/www_bget?ko:K00979">K00979</a>  kdsB; 3-deoxy-manno-octulosonate cytidylyltransferase (CMP-KDO synthetase) [EC:2.7.7.38]
D      comp56642_c0_seq20; <a href="/dbget-bin/www_bget?ko:K02527">K02527</a>  kdtA, waaA; 3-deoxy-D-manno-octulosonic-acid transferase [EC:2.4.99.12 2.4.99.13 2.4.99.14 2.4.99.15]
C    01005 Lipopolysaccharide biosynthesis proteins [BR:ko01005]
C    00550 Peptidoglycan biosynthesis [PATH:<a href="http://www.kegg.jp/kegg-bin/show_pathway?@ko00550/K02563">ko00550</a>]
D      comp55434_c1_seq1; <a href="/dbget-bin/www_bget?ko:K02563">K02563</a>  murG; UDP-N-acetylglucosamine--N-acetylmuramyl-(pentapeptide) pyrophosphoryl-undecaprenol N-acetylglucosamine transferase [EC:2.4.1.227]
C    00511 Other glycan degradation [PATH:<a href="http://www.kegg.jp/kegg-bin/show_pathway?@ko00511/K01190/K12309/K12373/K01191/K01227/K01206/K15923/K01444/K17108">ko00511</a>]
D      comp58177_c0_seq1; <a href="/dbget-bin/www_bget?ko:K01190">K01190</a>  lacZ; beta-galactosidase [EC:3.2.1.23]
D      comp47567_c0_seq1; <a href="/dbget-bin/www_bget?ko:K12309">K12309</a>  GLB1, ELNR1; beta-galactosidase [EC:3.2.1.23]
D      comp53235_c0_seq2; <a href="/dbget-bin/www_bget?ko:K12373">K12373</a>  HEXA_B; hexosaminidase [EC:3.2.1.52]
D      comp58573_c1_seq2; <a href="/dbget-bin/www_bget?ko:K12373">K12373</a>  HEXA_B; hexosaminidase [EC:3.2.1.52]
D      comp40873_c0_seq1; <a href="/dbget-bin/www_bget?ko:K01191">K01191</a>  E3.2.1.24; alpha-mannosidase [EC:3.2.1.24]
D      comp56024_c0_seq1; <a href="/dbget-bin/www_bget?ko:K01191">K01191</a>  E3.2.1.24; alpha-mannosidase [EC:3.2.1.24]
D      comp56166_c0_seq3; <a href="/dbget-bin/www_bget?ko:K01191">K01191</a>  E3.2.1.24; alpha-mannosidase [EC:3.2.1.24]
D      comp55525_c0_seq7; <a href="/dbget-bin/www_bget?ko:K01227">K01227</a>  E3.2.1.96; mannosyl-glycoprotein endo-beta-N-acetylglucosaminidase [EC:3.2.1.96]
D      comp51496_c0_seq2; <a href="/dbget-bin/www_bget?ko:K01206">K01206</a>  FUCA; alpha-L-fucosidase [EC:3.2.1.51]
D      comp59118_c0_seq1; <a href="/dbget-bin/www_bget?ko:K01206">K01206</a>  FUCA; alpha-L-fucosidase [EC:3.2.1.51]
D      comp56125_c0_seq1; <a href="/dbget-bin/www_bget?ko:K15923">K15923</a>  AXY8, FUC95A; alpha-L-fucosidase 2 [EC:3.2.1.51]
D      comp47182_c0_seq3; <a href="/dbget-bin/www_bget?ko:K01444">K01444</a>  E3.5.1.26; N4-(beta-N-acetylglucosaminyl)-L-asparaginase [EC:3.5.1.26]
D      comp51899_c0_seq4; <a href="/dbget-bin/www_bget?ko:K17108">K17108</a>  GBA2; non-lysosomal glucosylceramidase [EC:3.2.1.45]
D      comp55500_c0_seq9; <a href="/dbget-bin/www_bget?ko:K17108">K17108</a>  GBA2; non-lysosomal glucosylceramidase [EC:3.2.1.45]
B
B  <b>Metabolism of cofactors and vitamins</b>
C    00730 Thiamine metabolism [PATH:<a href="http://www.kegg.jp/kegg-bin/show_pathway?@ko00730/K03147/K14153/K04487/K11717/K01662/K00878/K06928/K00949">ko00730</a>]
D      comp58195_c0_seq3; <a href="/dbget-bin/www_bget?ko:K03147">K03147</a>  thiC; thiamine biosynthesis protein ThiC
D      comp51973_c0_seq6; <a href="/dbget-bin/www_bget?ko:K14153">K14153</a>  thiDE; hydroxymethylpyrimidine kinase / phosphomethylpyrimidine kinase / thiamine-phosphate diphosphorylase [EC:2.7.1.49 2.7.4.7 2.5.1.3]
D      comp49393_c0_seq1; <a href="/dbget-bin/www_bget?ko:K04487">K04487</a>  iscS, NFS1; cysteine desulfurase [EC:2.8.1.7]
D      comp51941_c0_seq17; <a href="/dbget-bin/www_bget?ko:K11717">K11717</a>  sufS; cysteine desulfurase / selenocysteine lyase [EC:2.8.1.7 4.4.1.16]
D      comp45992_c0_seq1; <a href="/dbget-bin/www_bget?ko:K01662">K01662</a>  dxs; 1-deoxy-D-xylulose-5-phosphate synthase [EC:2.2.1.7]
D      comp57011_c0_seq1; <a href="/dbget-bin/www_bget?ko:K01662">K01662</a>  dxs; 1-deoxy-D-xylulose-5-phosphate synthase [EC:2.2.1.7]
D      comp59916_c0_seq1; <a href="/dbget-bin/www_bget?ko:K01662">K01662</a>  dxs; 1-deoxy-D-xylulose-5-phosphate synthase [EC:2.2.1.7]
D      comp49167_c0_seq1; <a href="/dbget-bin/www_bget?ko:K00878">K00878</a>  thiM; hydroxyethylthiazole kinase [EC:2.7.1.50]
D      comp56863_c1_seq1; <a href="/dbget-bin/www_bget?ko:K06928">K06928</a>  K06928; nucleoside-triphosphatase THEP1 [EC:3.6.1.15]
D      comp56324_c0_seq19; <a href="/dbget-bin/www_bget?ko:K00949">K00949</a>  E2.7.6.2, THI80; thiamine pyrophosphokinase [EC:2.7.6.2]
C    00740 Riboflavin metabolism [PATH:<a href="http://www.kegg.jp/kegg-bin/show_pathway?@ko00740/K14652/K11752/K00794/K00793/K00861/K01078">ko00740</a>]
D      comp45328_c0_seq1; <a href="/dbget-bin/www_bget?ko:K14652">K14652</a>  ribBA; 3,4-dihydroxy 2-butanone 4-phosphate synthase / GTP cyclohydrolase II [EC:4.1.99.12 3.5.4.25]
D      comp57593_c0_seq2; <a href="/dbget-bin/www_bget?ko:K14652">K14652</a>  ribBA; 3,4-dihydroxy 2-butanone 4-phosphate synthase / GTP cyclohydrolase II [EC:4.1.99.12 3.5.4.25]
D      comp57278_c0_seq2; <a href="/dbget-bin/www_bget?ko:K11752">K11752</a>  ribD; diaminohydroxyphosphoribosylaminopyrimidine deaminase / 5-amino-6-(5-phosphoribosylamino)uracil reductase [EC:3.5.4.26 1.1.1.193]
D      comp53748_c0_seq1; <a href="/dbget-bin/www_bget?ko:K00794">K00794</a>  ribH, RIB4; 6,7-dimethyl-8-ribityllumazine synthase [EC:2.5.1.78]
D      comp56226_c0_seq2; <a href="/dbget-bin/www_bget?ko:K00793">K00793</a>  ribE, RIB5; riboflavin synthase [EC:2.5.1.9]
D      comp54357_c0_seq26; <a href="/dbget-bin/www_bget?ko:K00861">K00861</a>  RFK, FMN1; riboflavin kinase [EC:2.7.1.26]
D      comp49150_c0_seq1; <a href="/dbget-bin/www_bget?ko:K01078">K01078</a>  E3.1.3.2; acid phosphatase [EC:3.1.3.2]
C    00750 Vitamin B6 metabolism [PATH:<a href="http://www.kegg.jp/kegg-bin/show_pathway?@ko00750/K00868/K00831/K01733/K06215/K08681">ko00750</a>]
D      comp59969_c0_seq23; <a href="/dbget-bin/www_bget?ko:K00868">K00868</a>  pdxK, pdxY; pyridoxine kinase [EC:2.7.1.35]
D      comp55250_c0_seq1; <a href="/dbget-bin/www_bget?ko:K00831">K00831</a>  serC, PSAT1; phosphoserine aminotransferase [EC:2.6.1.52]
D      comp58626_c0_seq4; <a href="/dbget-bin/www_bget?ko:K01733">K01733</a>  thrC; threonine synthase [EC:4.2.3.1]
D      comp49459_c0_seq1; <a href="/dbget-bin/www_bget?ko:K06215">K06215</a>  pdxS, pdx1; pyridoxine biosynthesis protein [EC:4.-.-.-]
D      comp53284_c0_seq2; <a href="/dbget-bin/www_bget?ko:K06215">K06215</a>  pdxS, pdx1; pyridoxine biosynthesis protein [EC:4.-.-.-]
D      comp50344_c0_seq3; <a href="/dbget-bin/www_bget?ko:K08681">K08681</a>  pdxT, pdx2; glutamine amidotransferase [EC:2.6.-.-]
C    00760 Nicotinate and nicotinamide metabolism [PATH:<a href="http://www.kegg.jp/kegg-bin/show_pathway?@ko00760/K00278/K03517/K00767/K00763/K01081/K03787/K01240/K06210/K03426/K01950/K00858">ko00760</a>]
D      comp57169_c0_seq8; <a href="/dbget-bin/www_bget?ko:K00278">K00278</a>  nadB; L-aspartate oxidase [EC:1.4.3.16]
D      comp44286_c0_seq2; <a href="/dbget-bin/www_bget?ko:K03517">K03517</a>  nadA; quinolinate synthase [EC:2.5.1.72]
D      comp50113_c0_seq1; <a href="/dbget-bin/www_bget?ko:K00767">K00767</a>  nadC, QPRT; nicotinate-nucleotide pyrophosphorylase (carboxylating) [EC:2.4.2.19]
D      comp59552_c2_seq13; <a href="/dbget-bin/www_bget?ko:K00763">K00763</a>  pncB, NAPRT1; nicotinate phosphoribosyltransferase [EC:6.3.4.21]
D      comp52495_c0_seq1; <a href="/dbget-bin/www_bget?ko:K01081">K01081</a>  E3.1.3.5; 5'-nucleotidase [EC:3.1.3.5]
D      comp52744_c0_seq1; <a href="/dbget-bin/www_bget?ko:K03787">K03787</a>  surE; 5'-nucleotidase [EC:3.1.3.5]
D      comp53433_c3_seq10; <a href="/dbget-bin/www_bget?ko:K03787">K03787</a>  surE; 5'-nucleotidase [EC:3.1.3.5]
D      comp55752_c0_seq1; <a href="/dbget-bin/www_bget?ko:K01240">K01240</a>  URH1; uridine nucleosidase [EC:3.2.2.3]
D      comp57080_c0_seq9; <a href="/dbget-bin/www_bget?ko:K06210">K06210</a>  NMNAT; nicotinamide mononucleotide adenylyltransferase [EC:2.7.7.1 2.7.7.18]
D      comp55456_c2_seq5; <a href="/dbget-bin/www_bget?ko:K03426">K03426</a>  E3.6.1.22, NUDT12, nudC; NAD+ diphosphatase [EC:3.6.1.22]
D      comp53914_c0_seq1; <a href="/dbget-bin/www_bget?ko:K01950">K01950</a>  E6.3.5.1, NADSYN1, QNS1, nadE; NAD+ synthase (glutamine-hydrolysing) [EC:6.3.5.1]
D      comp55013_c0_seq1; <a href="/dbget-bin/www_bget?ko:K00858">K00858</a>  ppnK, NADK; NAD+ kinase [EC:2.7.1.23]
C    00770 Pantothenate and CoA biosynthesis [PATH:<a href="http://www.kegg.jp/kegg-bin/show_pathway?@ko00770/K01652/K01653/K00053/K01687/K00606/K01918/K09680/K01922/K01598/K02201/K00859/K06133/K00826/K01431/K01464/K00207">ko00770</a>]
D      comp57192_c0_seq2; <a href="/dbget-bin/www_bget?ko:K01652">K01652</a>  E2.2.1.6L, ilvB, ilvG, ilvI; acetolactate synthase I/II/III large subunit [EC:2.2.1.6]
D      comp54908_c3_seq1; <a href="/dbget-bin/www_bget?ko:K01653">K01653</a>  E2.2.1.6S, ilvH, ilvN; acetolactate synthase I/III small subunit [EC:2.2.1.6]
D      comp58205_c0_seq2; <a href="/dbget-bin/www_bget?ko:K00053">K00053</a>  ilvC; ketol-acid reductoisomerase [EC:1.1.1.86]
D      comp45451_c0_seq4; <a href="/dbget-bin/www_bget?ko:K01687">K01687</a>  ilvD; dihydroxy-acid dehydratase [EC:4.2.1.9]
D      comp40284_c0_seq1; <a href="/dbget-bin/www_bget?ko:K00606">K00606</a>  panB; 3-methyl-2-oxobutanoate hydroxymethyltransferase [EC:2.1.2.11]
D      comp50561_c0_seq1; <a href="/dbget-bin/www_bget?ko:K01918">K01918</a>  panC; pantoate--beta-alanine ligase [EC:6.3.2.1]
D      comp59014_c0_seq3; <a href="/dbget-bin/www_bget?ko:K09680">K09680</a>  coaW; type II pantothenate kinase [EC:2.7.1.33]
D      comp54488_c0_seq20; <a href="/dbget-bin/www_bget?ko:K01922">K01922</a>  PPCS, coaB; phosphopantothenate-cysteine ligase [EC:6.3.2.5]
D      comp50241_c0_seq3; <a href="/dbget-bin/www_bget?ko:K01598">K01598</a>  PPCDC, coaC; phosphopantothenoylcysteine decarboxylase [EC:4.1.1.36]
D      comp59526_c0_seq1; <a href="/dbget-bin/www_bget?ko:K02201">K02201</a>  E2.7.7.3B; pantetheine-phosphate adenylyltransferase [EC:2.7.7.3]
D      comp46637_c0_seq1; <a href="/dbget-bin/www_bget?ko:K00859">K00859</a>  coaE; dephospho-CoA kinase [EC:2.7.1.24]
D      comp41959_c0_seq1; <a href="/dbget-bin/www_bget?ko:K06133">K06133</a>  LYS5, acpT; 4'-phosphopantetheinyl transferase [EC:2.7.8.-]
D      comp56219_c0_seq2; <a href="/dbget-bin/www_bget?ko:K06133">K06133</a>  LYS5, acpT; 4'-phosphopantetheinyl transferase [EC:2.7.8.-]
D      comp36700_c0_seq1; <a href="/dbget-bin/www_bget?ko:K00826">K00826</a>  E2.6.1.42, ilvE; branched-chain amino acid aminotransferase [EC:2.6.1.42]
D      comp44263_c0_seq2; <a href="/dbget-bin/www_bget?ko:K00826">K00826</a>  E2.6.1.42, ilvE; branched-chain amino acid aminotransferase [EC:2.6.1.42]
D      comp46288_c0_seq2; <a href="/dbget-bin/www_bget?ko:K00826">K00826</a>  E2.6.1.42, ilvE; branched-chain amino acid aminotransferase [EC:2.6.1.42]
D      comp52365_c1_seq1; <a href="/dbget-bin/www_bget?ko:K00826">K00826</a>  E2.6.1.42, ilvE; branched-chain amino acid aminotransferase [EC:2.6.1.42]
D      comp57777_c1_seq1; <a href="/dbget-bin/www_bget?ko:K00826">K00826</a>  E2.6.1.42, ilvE; branched-chain amino acid aminotransferase [EC:2.6.1.42]
D      comp53447_c0_seq1; <a href="/dbget-bin/www_bget?ko:K01431">K01431</a>  E3.5.1.6; beta-ureidopropionase [EC:3.5.1.6]
D      comp53976_c0_seq1; <a href="/dbget-bin/www_bget?ko:K01464">K01464</a>  E3.5.2.2, DPYS; dihydropyrimidinase [EC:3.5.2.2]
D      comp53329_c0_seq1; <a href="/dbget-bin/www_bget?ko:K00207">K00207</a>  E1.3.1.2, DPYD; dihydropyrimidine dehydrogenase (NADP+) [EC:1.3.1.2]
C    00780 Biotin metabolism [PATH:<a href="http://www.kegg.jp/kegg-bin/show_pathway?@ko00780/K09458/K00059/K00208/K00652/K00833/K01012">ko00780</a>]
D      comp57393_c0_seq8; <a href="/dbget-bin/www_bget?ko:K09458">K09458</a>  fabF; 3-oxoacyl-[acyl-carrier-protein] synthase II [EC:2.3.1.179]
D      comp59219_c2_seq7; <a href="/dbget-bin/www_bget?ko:K09458">K09458</a>  fabF; 3-oxoacyl-[acyl-carrier-protein] synthase II [EC:2.3.1.179]
D      comp53141_c0_seq2; <a href="/dbget-bin/www_bget?ko:K00059">K00059</a>  fabG; 3-oxoacyl-[acyl-carrier protein] reductase [EC:1.1.1.100]
D      comp61361_c0_seq1; <a href="/dbget-bin/www_bget?ko:K00059">K00059</a>  fabG; 3-oxoacyl-[acyl-carrier protein] reductase [EC:1.1.1.100]
D      comp58443_c1_seq2; <a href="/dbget-bin/www_bget?ko:K00208">K00208</a>  fabI; enoyl-[acyl-carrier protein] reductase I [EC:1.3.1.9 1.3.1.10]
D      comp56376_c0_seq3; <a href="/dbget-bin/www_bget?ko:K00652">K00652</a>  bioF; 8-amino-7-oxononanoate synthase [EC:2.3.1.47]
D      comp57048_c0_seq5; <a href="/dbget-bin/www_bget?ko:K00833">K00833</a>  bioA; adenosylmethionine-8-amino-7-oxononanoate aminotransferase [EC:2.6.1.62]
D      comp56506_c0_seq2; <a href="/dbget-bin/www_bget?ko:K01012">K01012</a>  bioB; biotin synthase [EC:2.8.1.6]
C    00785 Lipoic acid metabolism [PATH:<a href="http://www.kegg.jp/kegg-bin/show_pathway?@ko00785/K03644/K03801">ko00785</a>]
D      comp54634_c0_seq2; <a href="/dbget-bin/www_bget?ko:K03644">K03644</a>  lipA; lipoic acid synthetase [EC:2.8.1.8]
D      comp59200_c0_seq7; <a href="/dbget-bin/www_bget?ko:K03644">K03644</a>  lipA; lipoic acid synthetase [EC:2.8.1.8]
D      comp40489_c0_seq1; <a href="/dbget-bin/www_bget?ko:K03801">K03801</a>  lipB; lipoyl(octanoyl) transferase [EC:2.3.1.181]
D      comp49077_c0_seq1; <a href="/dbget-bin/www_bget?ko:K03801">K03801</a>  lipB; lipoyl(octanoyl) transferase [EC:2.3.1.181]
C    00790 Folate biosynthesis [PATH:<a href="http://www.kegg.jp/kegg-bin/show_pathway?@ko00790/K01495/K01113/K01633/K13941/K13998/K01930/K01307/K03639/K03635/K13950">ko00790</a>]
D      comp58399_c0_seq2; <a href="/dbget-bin/www_bget?ko:K01495">K01495</a>  folE; GTP cyclohydrolase I [EC:3.5.4.16]
D      comp45778_c0_seq1; <a href="/dbget-bin/www_bget?ko:K01113">K01113</a>  phoD; alkaline phosphatase D [EC:3.1.3.1]
D      comp56858_c1_seq8; <a href="/dbget-bin/www_bget?ko:K01633">K01633</a>  folB; dihydroneopterin aldolase [EC:4.1.2.25]
D      comp34716_c0_seq1; <a href="/dbget-bin/www_bget?ko:K13941">K13941</a>  folKP; 2-amino-4-hydroxy-6-hydroxymethyldihydropteridine diphosphokinase / dihydropteroate synthase [EC:2.7.6.3 2.5.1.15]
D      comp57414_c0_seq1; <a href="/dbget-bin/www_bget?ko:K13998">K13998</a>  DHFR-TS; dihydrofolate reductase / thymidylate synthase [EC:1.5.1.3 2.1.1.45]
D      comp50445_c0_seq16; <a href="/dbget-bin/www_bget?ko:K01930">K01930</a>  FPGS; folylpolyglutamate synthase [EC:6.3.2.17]
D      comp55606_c1_seq6; <a href="/dbget-bin/www_bget?ko:K01930">K01930</a>  FPGS; folylpolyglutamate synthase [EC:6.3.2.17]
D      comp59094_c1_seq4; <a href="/dbget-bin/www_bget?ko:K01930">K01930</a>  FPGS; folylpolyglutamate synthase [EC:6.3.2.17]
D      comp52697_c0_seq9; <a href="/dbget-bin/www_bget?ko:K01307">K01307</a>  GGH; gamma-glutamyl hydrolase [EC:3.4.19.9]
D      comp48121_c0_seq2; <a href="/dbget-bin/www_bget?ko:K03639">K03639</a>  MOCS1, moaA; molybdenum cofactor biosynthesis protein
D      comp59374_c0_seq8; <a href="/dbget-bin/www_bget?ko:K03639">K03639</a>  MOCS1, moaA; molybdenum cofactor biosynthesis protein
D      comp47854_c0_seq1; <a href="/dbget-bin/www_bget?ko:K03635">K03635</a>  MOCS2, moaE; molybdopterin synthase catalytic subunit [EC:2.-.-.-]
D      comp63261_c0_seq1; <a href="/dbget-bin/www_bget?ko:K03635">K03635</a>  MOCS2, moaE; molybdopterin synthase catalytic subunit [EC:2.-.-.-]
D      comp57757_c0_seq3; <a href="/dbget-bin/www_bget?ko:K13950">K13950</a>  pabAB; para-aminobenzoate synthetase [EC:2.6.1.85]
C    00670 One carbon pool by folate [PATH:<a href="http://www.kegg.jp/kegg-bin/show_pathway?@ko00670/K13998/K01938/K00600/K00601/K00602/K00604/K00605/K01433/K00297/K01934">ko00670</a>]
D      comp57414_c0_seq1; <a href="/dbget-bin/www_bget?ko:K13998">K13998</a>  DHFR-TS; dihydrofolate reductase / thymidylate synthase [EC:1.5.1.3 2.1.1.45]
D      comp55395_c0_seq1; <a href="/dbget-bin/www_bget?ko:K01938">K01938</a>  fhs; formate--tetrahydrofolate ligase [EC:6.3.4.3]
D      comp54510_c0_seq1; <a href="/dbget-bin/www_bget?ko:K00600">K00600</a>  glyA, SHMT; glycine hydroxymethyltransferase [EC:2.1.2.1]
D      comp56200_c0_seq1; <a href="/dbget-bin/www_bget?ko:K00600">K00600</a>  glyA, SHMT; glycine hydroxymethyltransferase [EC:2.1.2.1]
D      comp56514_c0_seq1; <a href="/dbget-bin/www_bget?ko:K00600">K00600</a>  glyA, SHMT; glycine hydroxymethyltransferase [EC:2.1.2.1]
D      comp58011_c1_seq1; <a href="/dbget-bin/www_bget?ko:K00600">K00600</a>  glyA, SHMT; glycine hydroxymethyltransferase [EC:2.1.2.1]
D      comp55291_c0_seq16; <a href="/dbget-bin/www_bget?ko:K00601">K00601</a>  E2.1.2.2; phosphoribosylglycinamide formyltransferase [EC:2.1.2.2]
D      comp58509_c0_seq1; <a href="/dbget-bin/www_bget?ko:K00602">K00602</a>  purH; phosphoribosylaminoimidazolecarboxamide formyltransferase / IMP cyclohydrolase [EC:2.1.2.3 3.5.4.10]
D      comp53118_c1_seq3; <a href="/dbget-bin/www_bget?ko:K00604">K00604</a>  MTFMT, fmt; methionyl-tRNA formyltransferase [EC:2.1.2.9]
D      comp57653_c0_seq2; <a href="/dbget-bin/www_bget?ko:K00605">K00605</a>  gcvT, AMT; aminomethyltransferase [EC:2.1.2.10]
D      comp57083_c0_seq7; <a href="/dbget-bin/www_bget?ko:K01433">K01433</a>  purU; formyltetrahydrofolate deformylase [EC:3.5.1.10]
D      comp60433_c0_seq1; <a href="/dbget-bin/www_bget?ko:K00297">K00297</a>  metF, MTHFR; methylenetetrahydrofolate reductase (NADPH) [EC:1.5.1.20]
D      comp47752_c0_seq1; <a href="/dbget-bin/www_bget?ko:K01934">K01934</a>  E6.3.3.2; 5-formyltetrahydrofolate cyclo-ligase [EC:6.3.3.2]
D      comp51024_c0_seq2; <a href="/dbget-bin/www_bget?ko:K01934">K01934</a>  E6.3.3.2; 5-formyltetrahydrofolate cyclo-ligase [EC:6.3.3.2]
C    00830 Retinol metabolism [PATH:<a href="http://www.kegg.jp/kegg-bin/show_pathway?@ko00830/K00121/K00001/K11147/K11155">ko00830</a>]
D      comp32193_c0_seq3; <a href="/dbget-bin/www_bget?ko:K00121">K00121</a>  frmA, ADH5, adhC; S-(hydroxymethyl)glutathione dehydrogenase / alcohol dehydrogenase [EC:1.1.1.284 1.1.1.1]
D      comp55546_c0_seq1; <a href="/dbget-bin/www_bget?ko:K00121">K00121</a>  frmA, ADH5, adhC; S-(hydroxymethyl)glutathione dehydrogenase / alcohol dehydrogenase [EC:1.1.1.284 1.1.1.1]
D      comp46391_c0_seq6; <a href="/dbget-bin/www_bget?ko:K00001">K00001</a>  E1.1.1.1, adh; alcohol dehydrogenase [EC:1.1.1.1]
D      comp47846_c0_seq1; <a href="/dbget-bin/www_bget?ko:K00001">K00001</a>  E1.1.1.1, adh; alcohol dehydrogenase [EC:1.1.1.1]
D      comp55735_c0_seq2; <a href="/dbget-bin/www_bget?ko:K00001">K00001</a>  E1.1.1.1, adh; alcohol dehydrogenase [EC:1.1.1.1]
D      comp56151_c0_seq6; <a href="/dbget-bin/www_bget?ko:K00001">K00001</a>  E1.1.1.1, adh; alcohol dehydrogenase [EC:1.1.1.1]
D      comp55293_c3_seq5; <a href="/dbget-bin/www_bget?ko:K11147">K11147</a>  DHRS4; dehydrogenase/reductase SDR family member 4 [EC:1.1.-.-]
D      comp55308_c0_seq7; <a href="/dbget-bin/www_bget?ko:K11155">K11155</a>  DGAT1; diacylglycerol O-acyltransferase 1 [EC:2.3.1.20 2.3.1.75 2.3.1.76]
C    00860 Porphyrin and chlorophyll metabolism [PATH:<a href="http://www.kegg.jp/kegg-bin/show_pathway?@ko00860/K01885/K02492/K01845/K01698/K01749/K01719/K01599/K00228/K00231/K01772/K02257/K02259/K03403/K03404/K03428/K04035/K00218/K04040/K08099/K13600/K13606/K13071/K13545/K10960/K00510/K08101/K00522">ko00860</a>]
D      comp42546_c0_seq1; <a href="/dbget-bin/www_bget?ko:K01885">K01885</a>  EARS, gltX; glutamyl-tRNA synthetase [EC:6.1.1.17]
D      comp53759_c0_seq1; <a href="/dbget-bin/www_bget?ko:K01885">K01885</a>  EARS, gltX; glutamyl-tRNA synthetase [EC:6.1.1.17]
D      comp59142_c0_seq3; <a href="/dbget-bin/www_bget?ko:K02492">K02492</a>  hemA; glutamyl-tRNA reductase [EC:1.2.1.70]
D      comp59396_c3_seq3; <a href="/dbget-bin/www_bget?ko:K01845">K01845</a>  hemL; glutamate-1-semialdehyde 2,1-aminomutase [EC:5.4.3.8]
D      comp41427_c0_seq2; <a href="/dbget-bin/www_bget?ko:K01698">K01698</a>  hemB, ALAD; porphobilinogen synthase [EC:4.2.1.24]
D      comp59792_c0_seq22; <a href="/dbget-bin/www_bget?ko:K01749">K01749</a>  hemC, HMBS; hydroxymethylbilane synthase [EC:2.5.1.61]
D      comp51153_c0_seq4; <a href="/dbget-bin/www_bget?ko:K01719">K01719</a>  hemD, UROS; uroporphyrinogen-III synthase [EC:4.2.1.75]
D      comp52722_c0_seq2; <a href="/dbget-bin/www_bget?ko:K01599">K01599</a>  hemE, UROD; uroporphyrinogen decarboxylase [EC:4.1.1.37]
D      comp53678_c0_seq3; <a href="/dbget-bin/www_bget?ko:K01599">K01599</a>  hemE, UROD; uroporphyrinogen decarboxylase [EC:4.1.1.37]
D      comp51205_c0_seq1; <a href="/dbget-bin/www_bget?ko:K00228">K00228</a>  hemF, CPOX; coproporphyrinogen III oxidase [EC:1.3.3.3]
D      comp46084_c0_seq1; <a href="/dbget-bin/www_bget?ko:K00231">K00231</a>  PPOX, hemY; oxygen-dependent protoporphyrinogen oxidase [EC:1.3.3.4]
D      comp55756_c0_seq2; <a href="/dbget-bin/www_bget?ko:K00231">K00231</a>  PPOX, hemY; oxygen-dependent protoporphyrinogen oxidase [EC:1.3.3.4]
D      comp28574_c0_seq1; <a href="/dbget-bin/www_bget?ko:K01772">K01772</a>  hemH, FECH; ferrochelatase [EC:4.99.1.1]
D      comp58164_c0_seq1; <a href="/dbget-bin/www_bget?ko:K01772">K01772</a>  hemH, FECH; ferrochelatase [EC:4.99.1.1]
D      comp56527_c0_seq2; <a href="/dbget-bin/www_bget?ko:K02257">K02257</a>  COX10; protoheme IX farnesyltransferase [EC:2.5.1.-]
D      comp51693_c0_seq1; <a href="/dbget-bin/www_bget?ko:K02259">K02259</a>  COX15; cytochrome c oxidase assembly protein subunit 15
D      comp59924_c0_seq1; <a href="/dbget-bin/www_bget?ko:K03403">K03403</a>  chlH, bchH; magnesium chelatase subunit H [EC:6.6.1.1]
D      comp54839_c0_seq1; <a href="/dbget-bin/www_bget?ko:K03404">K03404</a>  chlD, bchD; magnesium chelatase subunit D [EC:6.6.1.1]
D      comp44293_c0_seq1; <a href="/dbget-bin/www_bget?ko:K03428">K03428</a>  E2.1.1.11, chlM, bchM; magnesium-protoporphyrin O-methyltransferase [EC:2.1.1.11]
D      comp43819_c0_seq1; <a href="/dbget-bin/www_bget?ko:K04035">K04035</a>  E1.14.13.81, acsF, chlE; magnesium-protoporphyrin IX monomethyl ester (oxidative) cyclase [EC:1.14.13.81]
D      comp56517_c0_seq2; <a href="/dbget-bin/www_bget?ko:K00218">K00218</a>  E1.3.1.33, por; protochlorophyllide reductase [EC:1.3.1.33]
D      comp49089_c0_seq5; <a href="/dbget-bin/www_bget?ko:K04040">K04040</a>  chlG, bchG; chlorophyll synthase [EC:2.5.1.62]
D      comp43863_c0_seq1; <a href="/dbget-bin/www_bget?ko:K08099">K08099</a>  E3.1.1.14; chlorophyllase [EC:3.1.1.14]
D      comp51217_c0_seq2; <a href="/dbget-bin/www_bget?ko:K08099">K08099</a>  E3.1.1.14; chlorophyllase [EC:3.1.1.14]
D      comp57903_c0_seq3; <a href="/dbget-bin/www_bget?ko:K13600">K13600</a>  CAO; chlorophyllide a oxygenase [EC:1.14.13.122]
D      comp56314_c0_seq23; <a href="/dbget-bin/www_bget?ko:K13606">K13606</a>  NOL, NYC1; chlorophyll(ide) b reductase [EC:1.1.1.294]
D      comp57186_c1_seq2; <a href="/dbget-bin/www_bget?ko:K13606">K13606</a>  NOL, NYC1; chlorophyll(ide) b reductase [EC:1.1.1.294]
D      comp55451_c0_seq1; <a href="/dbget-bin/www_bget?ko:K13071">K13071</a>  PAO, ACD1; pheophorbide a oxygenase [EC:1.14.12.20]
D      comp53290_c2_seq3; <a href="/dbget-bin/www_bget?ko:K13545">K13545</a>  ACD2; red chlorophyll catabolite reductase [EC:1.3.1.80]
D      comp50983_c0_seq3; <a href="/dbget-bin/www_bget?ko:K10960">K10960</a>  chlP, bchP; geranylgeranyl reductase [EC:1.3.1.83]
D      comp51418_c0_seq1; <a href="/dbget-bin/www_bget?ko:K10960">K10960</a>  chlP, bchP; geranylgeranyl reductase [EC:1.3.1.83]
D      comp55855_c1_seq2; <a href="/dbget-bin/www_bget?ko:K00510">K00510</a>  HMOX, hmuO, ho; heme oxygenase [EC:1.14.99.3]
D      comp51043_c0_seq2; <a href="/dbget-bin/www_bget?ko:K08101">K08101</a>  E1.3.7.4; phytochromobilin:ferredoxin oxidoreductase [EC:1.3.7.4]
D      comp1196_c0_seq1; <a href="/dbget-bin/www_bget?ko:K00522">K00522</a>  FTH1; ferritin heavy chain [EC:1.16.3.1]
D      comp49991_c0_seq4; <a href="/dbget-bin/www_bget?ko:K00522">K00522</a>  FTH1; ferritin heavy chain [EC:1.16.3.1]
D      comp50712_c0_seq1; <a href="/dbget-bin/www_bget?ko:K00522">K00522</a>  FTH1; ferritin heavy chain [EC:1.16.3.1]
C    00130 Ubiquinone and other terpenoid-quinone biosynthesis [PATH:<a href="http://www.kegg.jp/kegg-bin/show_pathway?@ko00130/K00815/K01904/K03183/K06125/K00591/K06126/K06127/K02552/K14759/K14760/K01661/K02548/K00457/K12501/K12502/K09833/K09834/K05928">ko00130</a>]
D      comp47482_c0_seq4; <a href="/dbget-bin/www_bget?ko:K00815">K00815</a>  TAT; tyrosine aminotransferase [EC:2.6.1.5]
D      comp52735_c0_seq3; <a href="/dbget-bin/www_bget?ko:K00815">K00815</a>  TAT; tyrosine aminotransferase [EC:2.6.1.5]
D      comp49103_c0_seq1; <a href="/dbget-bin/www_bget?ko:K01904">K01904</a>  E6.2.1.12; 4-coumarate--CoA ligase [EC:6.2.1.12]
D      comp52962_c0_seq1; <a href="/dbget-bin/www_bget?ko:K01904">K01904</a>  E6.2.1.12; 4-coumarate--CoA ligase [EC:6.2.1.12]
D      comp55330_c0_seq3; <a href="/dbget-bin/www_bget?ko:K01904">K01904</a>  E6.2.1.12; 4-coumarate--CoA ligase [EC:6.2.1.12]
D      comp58010_c0_seq1; <a href="/dbget-bin/www_bget?ko:K01904">K01904</a>  E6.2.1.12; 4-coumarate--CoA ligase [EC:6.2.1.12]
D      comp59299_c0_seq10; <a href="/dbget-bin/www_bget?ko:K01904">K01904</a>  E6.2.1.12; 4-coumarate--CoA ligase [EC:6.2.1.12]
D      comp49362_c0_seq28; <a href="/dbget-bin/www_bget?ko:K03183">K03183</a>  ubiE; ubiquinone/menaquinone biosynthesis methyltransferase [EC:2.1.1.163 2.1.1.201]
D      comp56452_c1_seq8; <a href="/dbget-bin/www_bget?ko:K06125">K06125</a>  COQ2; 4-hydroxybenzoate hexaprenyltransferase [EC:2.5.1.-]
D      comp56244_c0_seq10; <a href="/dbget-bin/www_bget?ko:K00591">K00591</a>  COQ3; hexaprenyldihydroxybenzoate methyltransferase [EC:2.1.1.114]
D      comp52360_c0_seq1; <a href="/dbget-bin/www_bget?ko:K06126">K06126</a>  COQ6; ubiquinone biosynthesis monooxygenase Coq6 [EC:1.14.13.-]
D      comp56387_c0_seq5; <a href="/dbget-bin/www_bget?ko:K06127">K06127</a>  COQ5; ubiquinone biosynthesis methyltransferase [EC:2.1.1.201]
D      comp59136_c0_seq72; <a href="/dbget-bin/www_bget?ko:K02552">K02552</a>  menF; menaquinone-specific isochorismate synthase [EC:5.4.4.2]
D      comp59091_c1_seq47; <a href="/dbget-bin/www_bget?ko:K14759">K14759</a>  PHYLLO; isochorismate synthase / 2-succinyl-5-enolpyruvyl-6-hydroxy-3-cyclohexene-1-carboxylate synthase / 2-succinyl-6-hydroxy-2,4-cyclohexadiene-1-carboxylate synthase / O-succinylbenzoate synthase [EC:5.4.4.2 2.2.1.9 4.2.99.20 4.2.1.113]
D      comp56018_c0_seq38; <a href="/dbget-bin/www_bget?ko:K14760">K14760</a>  AAE14; acyl-activating enzyme 14 [EC:6.2.1.26]
D      comp58989_c0_seq14; <a href="/dbget-bin/www_bget?ko:K01661">K01661</a>  menB; naphthoate synthase [EC:4.1.3.36]
D      comp47172_c0_seq10; <a href="/dbget-bin/www_bget?ko:K02548">K02548</a>  menA; 1,4-dihydroxy-2-naphthoate octaprenyltransferase [EC:2.5.1.74 2.5.1.-]
D      comp52919_c0_seq1; <a href="/dbget-bin/www_bget?ko:K00457">K00457</a>  HPD, hppD; 4-hydroxyphenylpyruvate dioxygenase [EC:1.13.11.27]
D      comp57674_c1_seq4; <a href="/dbget-bin/www_bget?ko:K12501">K12501</a>  HST; homogentisate solanesyltransferase
D      comp49075_c0_seq1; <a href="/dbget-bin/www_bget?ko:K12502">K12502</a>  VTE3, APG1; MPBQ/MSBQ methyltransferase
D      comp50499_c0_seq1; <a href="/dbget-bin/www_bget?ko:K12502">K12502</a>  VTE3, APG1; MPBQ/MSBQ methyltransferase
D      comp57728_c0_seq9; <a href="/dbget-bin/www_bget?ko:K09833">K09833</a>  HPT, TPT; homogenitisate phytyltransferase
D      comp58810_c0_seq5; <a href="/dbget-bin/www_bget?ko:K09834">K09834</a>  VTE1, SXD1; tocopherol cyclase
D      comp53298_c0_seq1; <a href="/dbget-bin/www_bget?ko:K05928">K05928</a>  E2.1.1.95; tocopherol O-methyltransferase [EC:2.1.1.95]
B
B  <b>Metabolism of terpenoids and polyketides</b>
C    01006 Prenyltransferases [BR:ko01006]
C    00900 Terpenoid backbone biosynthesis [PATH:<a href="http://www.kegg.jp/kegg-bin/show_pathway?@ko00900/K01662/K00099/K00991/K00919/K01770/K03526/K00626/K01641/K00021/K00869/K00938/K01597/K01823/K00787/K14066/K13789/K05356/K11778/K10960/K05955/K05954/K08658/K06013/K00587/K15889/K05906/K15891/K15892">ko00900</a>]
D      comp45992_c0_seq1; <a href="/dbget-bin/www_bget?ko:K01662">K01662</a>  dxs; 1-deoxy-D-xylulose-5-phosphate synthase [EC:2.2.1.7]
D      comp57011_c0_seq1; <a href="/dbget-bin/www_bget?ko:K01662">K01662</a>  dxs; 1-deoxy-D-xylulose-5-phosphate synthase [EC:2.2.1.7]
D      comp59916_c0_seq1; <a href="/dbget-bin/www_bget?ko:K01662">K01662</a>  dxs; 1-deoxy-D-xylulose-5-phosphate synthase [EC:2.2.1.7]
D      comp58473_c2_seq3; <a href="/dbget-bin/www_bget?ko:K00099">K00099</a>  dxr; 1-deoxy-D-xylulose-5-phosphate reductoisomerase [EC:1.1.1.267]
D      comp58856_c1_seq11; <a href="/dbget-bin/www_bget?ko:K00991">K00991</a>  ispD; 2-C-methyl-D-erythritol 4-phosphate cytidylyltransferase [EC:2.7.7.60]
D      comp53197_c0_seq1; <a href="/dbget-bin/www_bget?ko:K00919">K00919</a>  ispE; 4-diphosphocytidyl-2-C-methyl-D-erythritol kinase [EC:2.7.1.148]
D      comp48472_c0_seq1; <a href="/dbget-bin/www_bget?ko:K01770">K01770</a>  ispF; 2-C-methyl-D-erythritol 2,4-cyclodiphosphate synthase [EC:4.6.1.12]
D      comp58697_c0_seq1; <a href="/dbget-bin/www_bget?ko:K03526">K03526</a>  E1.17.7.1, gcpE, ispG; (E)-4-hydroxy-3-methylbut-2-enyl-diphosphate synthase [EC:1.17.7.1]
D      comp55836_c0_seq2; <a href="/dbget-bin/www_bget?ko:K00626">K00626</a>  E2.3.1.9, atoB; acetyl-CoA C-acetyltransferase [EC:2.3.1.9]
D      comp58238_c0_seq1; <a href="/dbget-bin/www_bget?ko:K00626">K00626</a>  E2.3.1.9, atoB; acetyl-CoA C-acetyltransferase [EC:2.3.1.9]
D      comp58537_c0_seq2; <a href="/dbget-bin/www_bget?ko:K01641">K01641</a>  E2.3.3.10; hydroxymethylglutaryl-CoA synthase [EC:2.3.3.10]
D      comp47836_c1_seq1; <a href="/dbget-bin/www_bget?ko:K00021">K00021</a>  E1.1.1.34; hydroxymethylglutaryl-CoA reductase (NADPH) [EC:1.1.1.34]
D      comp59351_c3_seq1; <a href="/dbget-bin/www_bget?ko:K00021">K00021</a>  E1.1.1.34; hydroxymethylglutaryl-CoA reductase (NADPH) [EC:1.1.1.34]
D      comp55190_c0_seq3; <a href="/dbget-bin/www_bget?ko:K00869">K00869</a>  E2.7.1.36, MVK, mvaK1; mevalonate kinase [EC:2.7.1.36]
D      comp57701_c0_seq43; <a href="/dbget-bin/www_bget?ko:K00938">K00938</a>  E2.7.4.2, mvaK2; phosphomevalonate kinase [EC:2.7.4.2]
D      comp57252_c0_seq7; <a href="/dbget-bin/www_bget?ko:K01597">K01597</a>  MVD, mvaD; diphosphomevalonate decarboxylase [EC:4.1.1.33]
D      comp37791_c0_seq1; <a href="/dbget-bin/www_bget?ko:K01823">K01823</a>  idi, IDI; isopentenyl-diphosphate delta-isomerase [EC:5.3.3.2]
D      comp54060_c0_seq2; <a href="/dbget-bin/www_bget?ko:K00787">K00787</a>  FDPS; farnesyl diphosphate synthase [EC:2.5.1.1 2.5.1.10]
D      comp55614_c0_seq4; <a href="/dbget-bin/www_bget?ko:K14066">K14066</a>  GPS; geranyl diphosphate synthase [EC:2.5.1.1]
D      comp49092_c0_seq2; <a href="/dbget-bin/www_bget?ko:K13789">K13789</a>  GGPS; geranylgeranyl diphosphate synthase, type II [EC:2.5.1.1 2.5.1.10 2.5.1.29]
D      comp51740_c0_seq3; <a href="/dbget-bin/www_bget?ko:K13789">K13789</a>  GGPS; geranylgeranyl diphosphate synthase, type II [EC:2.5.1.1 2.5.1.10 2.5.1.29]
D      comp51084_c0_seq1; <a href="/dbget-bin/www_bget?ko:K05356">K05356</a>  SPS, sds; all-trans-nonaprenyl-diphosphate synthase [EC:2.5.1.84 2.5.1.85]
D      comp49361_c0_seq2; <a href="/dbget-bin/www_bget?ko:K11778">K11778</a>  DHDDS, RER2, SRT1; ditrans,polycis-polyprenyl diphosphate synthase [EC:2.5.1.87]
D      comp53299_c0_seq10; <a href="/dbget-bin/www_bget?ko:K11778">K11778</a>  DHDDS, RER2, SRT1; ditrans,polycis-polyprenyl diphosphate synthase [EC:2.5.1.87]
D      comp68147_c0_seq1; <a href="/dbget-bin/www_bget?ko:K11778">K11778</a>  DHDDS, RER2, SRT1; ditrans,polycis-polyprenyl diphosphate synthase [EC:2.5.1.87]
D      comp50983_c0_seq3; <a href="/dbget-bin/www_bget?ko:K10960">K10960</a>  chlP, bchP; geranylgeranyl reductase [EC:1.3.1.83]
D      comp51418_c0_seq1; <a href="/dbget-bin/www_bget?ko:K10960">K10960</a>  chlP, bchP; geranylgeranyl reductase [EC:1.3.1.83]
D      comp49889_c0_seq2; <a href="/dbget-bin/www_bget?ko:K05955">K05955</a>  FNTA; protein farnesyltransferase/geranylgeranyltransferase type-1 subunit alpha [EC:2.5.1.58 2.5.1.59]
D      comp46670_c1_seq1; <a href="/dbget-bin/www_bget?ko:K05954">K05954</a>  FNTB; protein farnesyltransferase subunit beta [EC:2.5.1.58]
D      comp59176_c1_seq2; <a href="/dbget-bin/www_bget?ko:K08658">K08658</a>  RCE1, FACE2; prenyl protein peptidase [EC:3.4.22.-]
D      comp57185_c0_seq4; <a href="/dbget-bin/www_bget?ko:K06013">K06013</a>  STE24; STE24 endopeptidase [EC:3.4.24.84]
D      comp56451_c0_seq1; <a href="/dbget-bin/www_bget?ko:K00587">K00587</a>  ICMT, STE14; protein-S-isoprenylcysteine O-methyltransferase [EC:2.1.1.100]
D      comp52157_c0_seq2; <a href="/dbget-bin/www_bget?ko:K15889">K15889</a>  PCME; prenylcysteine alpha-carboxyl methylesterase [EC:3.1.1.-]
D      comp52073_c0_seq2; <a href="/dbget-bin/www_bget?ko:K05906">K05906</a>  PCYOX1, FCLY; prenylcysteine oxidase / farnesylcysteine lyase [EC:1.8.3.5 1.8.3.6]
D      comp53970_c0_seq1; <a href="/dbget-bin/www_bget?ko:K15891">K15891</a>  FLDH; farnesol dehydrogenase [EC:1.1.1.216]
D      comp50271_c0_seq13; <a href="/dbget-bin/www_bget?ko:K15892">K15892</a>  FOLK; farnesol kinase [EC:2.7.1.-]
C    00902 Monoterpenoid biosynthesis [PATH:<a href="http://www.kegg.jp/kegg-bin/show_pathway?@ko00902/K15095/K07385">ko00902</a>]
D      comp41167_c0_seq3; <a href="/dbget-bin/www_bget?ko:K15095">K15095</a>  E1.1.1.208; (+)-neomenthol dehydrogenase [EC:1.1.1.208]
D      comp48986_c0_seq1; <a href="/dbget-bin/www_bget?ko:K15095">K15095</a>  E1.1.1.208; (+)-neomenthol dehydrogenase [EC:1.1.1.208]
D      comp55502_c0_seq3; <a href="/dbget-bin/www_bget?ko:K07385">K07385</a>  TPS-Cin; 1,8-cineole synthase [EC:4.2.3.108]
C    00909 Sesquiterpenoid and triterpenoid biosynthesis [PATH:<a href="http://www.kegg.jp/kegg-bin/show_pathway?@ko00909/K00801/K00511/K15891/K14184/K15813">ko00909</a>]
D      comp58678_c0_seq2; <a href="/dbget-bin/www_bget?ko:K00801">K00801</a>  FDFT1; farnesyl-diphosphate farnesyltransferase [EC:2.5.1.21]
D      comp56800_c0_seq1; <a href="/dbget-bin/www_bget?ko:K00511">K00511</a>  SQLE, ERG1; squalene monooxygenase [EC:1.14.13.132]
D      comp53970_c0_seq1; <a href="/dbget-bin/www_bget?ko:K15891">K15891</a>  FLDH; farnesol dehydrogenase [EC:1.1.1.216]
D      comp47859_c0_seq1; <a href="/dbget-bin/www_bget?ko:K14184">K14184</a>  TPS21; alpha-humulene/beta-caryophyllene synthase [EC:4.2.3.- 4.2.3.57]
D      comp50771_c0_seq3; <a href="/dbget-bin/www_bget?ko:K14184">K14184</a>  TPS21; alpha-humulene/beta-caryophyllene synthase [EC:4.2.3.- 4.2.3.57]
D      comp50607_c0_seq1; <a href="/dbget-bin/www_bget?ko:K15813">K15813</a>  LUP4; beta-amyrin synthase [EC:5.4.99.39]
C    00904 Diterpenoid biosynthesis [PATH:<a href="http://www.kegg.jp/kegg-bin/show_pathway?@ko00904/K04121/K04122/K04123/K05282/K04124/K04125/K13070">ko00904</a>]
D      comp55741_c0_seq6; <a href="/dbget-bin/www_bget?ko:K04121">K04121</a>  E4.2.3.19; ent-kaurene synthase [EC:4.2.3.19]
D      comp44798_c0_seq1; <a href="/dbget-bin/www_bget?ko:K04122">K04122</a>  E1.14.13.78; ent-kaurene oxidase [EC:1.14.13.78]
D      comp48058_c0_seq1; <a href="/dbget-bin/www_bget?ko:K04123">K04123</a>  KAO; ent-kaurenoic acid hydroxylase [EC:1.14.13.79]
D      comp55175_c0_seq8; <a href="/dbget-bin/www_bget?ko:K05282">K05282</a>  E1.14.11.12; gibberellin 20-oxidase [EC:1.14.11.12]
D      comp128456_c0_seq1; <a href="/dbget-bin/www_bget?ko:K05282">K05282</a>  E1.14.11.12; gibberellin 20-oxidase [EC:1.14.11.12]
D      comp58456_c1_seq1; <a href="/dbget-bin/www_bget?ko:K04124">K04124</a>  E1.14.11.15; gibberellin 3-beta-dioxygenase [EC:1.14.11.15]
D      comp40842_c0_seq1; <a href="/dbget-bin/www_bget?ko:K04125">K04125</a>  E1.14.11.13; gibberellin 2-oxidase [EC:1.14.11.13]
D      comp49947_c0_seq3; <a href="/dbget-bin/www_bget?ko:K04125">K04125</a>  E1.14.11.13; gibberellin 2-oxidase [EC:1.14.11.13]
D      comp59794_c1_seq1; <a href="/dbget-bin/www_bget?ko:K04125">K04125</a>  E1.14.11.13; gibberellin 2-oxidase [EC:1.14.11.13]
D      comp56583_c2_seq5; <a href="/dbget-bin/www_bget?ko:K13070">K13070</a>  MAS; momilactone-A synthase [EC:1.1.1.295]
C    00906 Carotenoid biosynthesis [PATH:<a href="http://www.kegg.jp/kegg-bin/show_pathway?@ko00906/K02291/K02293/K15744/K00514/K09835/K06443/K06444/K15746/K15747/K09837/K09838/K09839/K09840/K09841/K09842/K09843">ko00906</a>]
D      comp53906_c0_seq1; <a href="/dbget-bin/www_bget?ko:K02291">K02291</a>  crtB; phytoene synthase [EC:2.5.1.32]
D      comp58112_c0_seq5; <a href="/dbget-bin/www_bget?ko:K02291">K02291</a>  crtB; phytoene synthase [EC:2.5.1.32]
D      comp54624_c0_seq2; <a href="/dbget-bin/www_bget?ko:K02293">K02293</a>  PDS, crtP; 15-cis-phytoene desaturase [EC:1.3.5.5]
D      comp55412_c0_seq3; <a href="/dbget-bin/www_bget?ko:K15744">K15744</a>  Z-ISO; zeta-carotene isomerase [EC:5.2.1.12]
D      comp53226_c0_seq3; <a href="/dbget-bin/www_bget?ko:K00514">K00514</a>  ZDS, crtQ; zeta-carotene desaturase [EC:1.3.5.6]
D      comp56227_c0_seq4; <a href="/dbget-bin/www_bget?ko:K09835">K09835</a>  crtISO, crtH; prolycopene isomerase [EC:5.2.1.13]
D      comp52088_c0_seq1; <a href="/dbget-bin/www_bget?ko:K06443">K06443</a>  lcyB, crtL1, crtY; lycopene beta-cyclase [EC:5.5.1.19]
D      comp58214_c0_seq6; <a href="/dbget-bin/www_bget?ko:K06444">K06444</a>  lcyE, crtL2; lycopene epsilon-cyclase [EC:5.5.1.18]
D      comp53677_c0_seq1; <a href="/dbget-bin/www_bget?ko:K15746">K15746</a>  crtZ; beta-carotene 3-hydroxylase [EC:1.14.13.129]
D      comp50905_c0_seq1; <a href="/dbget-bin/www_bget?ko:K15747">K15747</a>  LUT5, CYP97A3; cytochrome P450, family 97, subfamily A (beta-ring hydroxylase) [EC:1.14.-.-]
D      comp51848_c0_seq2; <a href="/dbget-bin/www_bget?ko:K09837">K09837</a>  LUT1, CYP97C1; carotene epsilon-monooxygenase [EC:1.14.99.45]
D      comp53770_c1_seq6; <a href="/dbget-bin/www_bget?ko:K09838">K09838</a>  ZEP, ABA1; zeaxanthin epoxidase [EC:1.14.13.90]
D      comp49940_c0_seq12; <a href="/dbget-bin/www_bget?ko:K09839">K09839</a>  VDE, NPQ1; violaxanthin de-epoxidase [EC:1.10.99.3]
D      comp26691_c0_seq1; <a href="/dbget-bin/www_bget?ko:K09840">K09840</a>  NCED; 9-cis-epoxycarotenoid dioxygenase [EC:1.13.11.51]
D      comp49592_c0_seq1; <a href="/dbget-bin/www_bget?ko:K09840">K09840</a>  NCED; 9-cis-epoxycarotenoid dioxygenase [EC:1.13.11.51]
D      comp57094_c0_seq1; <a href="/dbget-bin/www_bget?ko:K09840">K09840</a>  NCED; 9-cis-epoxycarotenoid dioxygenase [EC:1.13.11.51]
D      comp54784_c0_seq2; <a href="/dbget-bin/www_bget?ko:K09841">K09841</a>  ABA2; xanthoxin dehydrogenase [EC:1.1.1.288]
D      comp54561_c1_seq2; <a href="/dbget-bin/www_bget?ko:K09842">K09842</a>  AAO3; abscisic-aldehyde oxidase [EC:1.2.3.14]
D      comp31981_c0_seq3; <a href="/dbget-bin/www_bget?ko:K09843">K09843</a>  E1.14.13.93; (+)-abscisic acid 8'-hydroxylase [EC:1.14.13.93]
D      comp50657_c0_seq16; <a href="/dbget-bin/www_bget?ko:K09843">K09843</a>  E1.14.13.93; (+)-abscisic acid 8'-hydroxylase [EC:1.14.13.93]
D      comp53127_c0_seq3; <a href="/dbget-bin/www_bget?ko:K09843">K09843</a>  E1.14.13.93; (+)-abscisic acid 8'-hydroxylase [EC:1.14.13.93]
C    00905 Brassinosteroid biosynthesis [PATH:<a href="http://www.kegg.jp/kegg-bin/show_pathway?@ko00905/K09587/K09588/K09591/K12638/K12640/K15639">ko00905</a>]
D      comp57137_c1_seq2; <a href="/dbget-bin/www_bget?ko:K09587">K09587</a>  CYP90B1, DWF4; cytochrome P450, family 90, subfamily B, polypeptide 1 (steroid 22-alpha-hydroxylase) [EC:1.14.13.-]
D      comp55459_c0_seq3; <a href="/dbget-bin/www_bget?ko:K09588">K09588</a>  CYP90A1, CPD; cytochrome P450, family 90, subfamily A, polypeptide 1 [EC:1.14.-.-]
D      comp46011_c0_seq2; <a href="/dbget-bin/www_bget?ko:K09591">K09591</a>  DET2; steroid 5-alpha-reductase [EC:1.3.1.22]
D      comp33272_c0_seq1; <a href="/dbget-bin/www_bget?ko:K12638">K12638</a>  CYP90D1; cytochrome P450, family 90, subfamily D, polypeptide 1 (3-epi-6-deoxocathasterone 23-monooxygenase) [EC:1.14.13.112]
D      comp57379_c0_seq6; <a href="/dbget-bin/www_bget?ko:K12640">K12640</a>  CYP85A2, BR6OX2; cytochrome P450, family 85, subfamily A, polypeptide 2 (brassinosteroid-6-oxidase 2) [EC:1.14.-.-]
D      comp49807_c1_seq1; <a href="/dbget-bin/www_bget?ko:K15639">K15639</a>  CYP734A1, BAS1; cytochrome P450, family 734, subfamily A, polypeptide 1 (PHYB activation tagged suppressor 1) [EC:1.14.-.-]
C    00981 Insect hormone biosynthesis [PATH:<a href="http://www.kegg.jp/kegg-bin/show_pathway?@ko00981">ko00981</a>]
C    00908 Zeatin biosynthesis [PATH:<a href="http://www.kegg.jp/kegg-bin/show_pathway?@ko00908/K10760/K10717/K00279/K00791/K13495">ko00908</a>]
D      comp36847_c0_seq1; <a href="/dbget-bin/www_bget?ko:K10760">K10760</a>  IPT; adenylate isopentenyltransferase (cytokinin synthase)
D      comp43026_c0_seq1; <a href="/dbget-bin/www_bget?ko:K10760">K10760</a>  IPT; adenylate isopentenyltransferase (cytokinin synthase)
D      comp88281_c0_seq1; <a href="/dbget-bin/www_bget?ko:K10760">K10760</a>  IPT; adenylate isopentenyltransferase (cytokinin synthase)
D      comp57745_c0_seq3; <a href="/dbget-bin/www_bget?ko:K10717">K10717</a>  CYP735A; cytokinin trans-hydroxylase
D      comp44581_c0_seq1; <a href="/dbget-bin/www_bget?ko:K00279">K00279</a>  E1.5.99.12; cytokinin dehydrogenase [EC:1.5.99.12]
D      comp49232_c0_seq2; <a href="/dbget-bin/www_bget?ko:K00279">K00279</a>  E1.5.99.12; cytokinin dehydrogenase [EC:1.5.99.12]
D      comp53374_c1_seq2; <a href="/dbget-bin/www_bget?ko:K00279">K00279</a>  E1.5.99.12; cytokinin dehydrogenase [EC:1.5.99.12]
D      comp54259_c1_seq1; <a href="/dbget-bin/www_bget?ko:K00279">K00279</a>  E1.5.99.12; cytokinin dehydrogenase [EC:1.5.99.12]
D      comp54787_c0_seq22; <a href="/dbget-bin/www_bget?ko:K00791">K00791</a>  miaA, TRIT1; tRNA dimethylallyltransferase [EC:2.5.1.75]
D      comp58887_c0_seq1; <a href="/dbget-bin/www_bget?ko:K13495">K13495</a>  CISZOG; cis-zeatin O-glucosyltransferase [EC:2.4.1.215]
C    00903 Limonene and pinene degradation [PATH:<a href="http://www.kegg.jp/kegg-bin/show_pathway?@ko00903/K00128/K00517">ko00903</a>]
D      comp44038_c0_seq3; <a href="/dbget-bin/www_bget?ko:K00128">K00128</a>  E1.2.1.3; aldehyde dehydrogenase (NAD+) [EC:1.2.1.3]
D      comp44097_c0_seq4; <a href="/dbget-bin/www_bget?ko:K00128">K00128</a>  E1.2.1.3; aldehyde dehydrogenase (NAD+) [EC:1.2.1.3]
D      comp49751_c0_seq2; <a href="/dbget-bin/www_bget?ko:K00128">K00128</a>  E1.2.1.3; aldehyde dehydrogenase (NAD+) [EC:1.2.1.3]
D      comp58228_c0_seq4; <a href="/dbget-bin/www_bget?ko:K00128">K00128</a>  E1.2.1.3; aldehyde dehydrogenase (NAD+) [EC:1.2.1.3]
D      comp58879_c2_seq1; <a href="/dbget-bin/www_bget?ko:K00128">K00128</a>  E1.2.1.3; aldehyde dehydrogenase (NAD+) [EC:1.2.1.3]
D      comp36755_c0_seq1; <a href="/dbget-bin/www_bget?ko:K00517">K00517</a>  E1.14.-.-;  [EC:1.14.-.-]
D      comp37009_c0_seq2; <a href="/dbget-bin/www_bget?ko:K00517">K00517</a>  E1.14.-.-;  [EC:1.14.-.-]
D      comp40234_c0_seq2; <a href="/dbget-bin/www_bget?ko:K00517">K00517</a>  E1.14.-.-;  [EC:1.14.-.-]
D      comp42811_c0_seq2; <a href="/dbget-bin/www_bget?ko:K00517">K00517</a>  E1.14.-.-;  [EC:1.14.-.-]
D      comp44874_c0_seq1; <a href="/dbget-bin/www_bget?ko:K00517">K00517</a>  E1.14.-.-;  [EC:1.14.-.-]
D      comp47857_c0_seq1; <a href="/dbget-bin/www_bget?ko:K00517">K00517</a>  E1.14.-.-;  [EC:1.14.-.-]
D      comp49639_c0_seq2; <a href="/dbget-bin/www_bget?ko:K00517">K00517</a>  E1.14.-.-;  [EC:1.14.-.-]
D      comp49988_c0_seq1; <a href="/dbget-bin/www_bget?ko:K00517">K00517</a>  E1.14.-.-;  [EC:1.14.-.-]
D      comp50552_c0_seq2; <a href="/dbget-bin/www_bget?ko:K00517">K00517</a>  E1.14.-.-;  [EC:1.14.-.-]
D      comp51602_c0_seq1; <a href="/dbget-bin/www_bget?ko:K00517">K00517</a>  E1.14.-.-;  [EC:1.14.-.-]
D      comp52391_c1_seq1; <a href="/dbget-bin/www_bget?ko:K00517">K00517</a>  E1.14.-.-;  [EC:1.14.-.-]
D      comp54276_c0_seq1; <a href="/dbget-bin/www_bget?ko:K00517">K00517</a>  E1.14.-.-;  [EC:1.14.-.-]
D      comp57143_c0_seq1; <a href="/dbget-bin/www_bget?ko:K00517">K00517</a>  E1.14.-.-;  [EC:1.14.-.-]
D      comp58625_c0_seq1; <a href="/dbget-bin/www_bget?ko:K00517">K00517</a>  E1.14.-.-;  [EC:1.14.-.-]
D      comp58738_c1_seq3; <a href="/dbget-bin/www_bget?ko:K00517">K00517</a>  E1.14.-.-;  [EC:1.14.-.-]
C    00281 Geraniol degradation [PATH:<a href="http://www.kegg.jp/kegg-bin/show_pathway?@ko00281/K01640">ko00281</a>]
D      comp57073_c2_seq3; <a href="/dbget-bin/www_bget?ko:K01640">K01640</a>  E4.1.3.4, HMGCL, hmgL; hydroxymethylglutaryl-CoA lyase [EC:4.1.3.4]
D      comp57174_c2_seq6; <a href="/dbget-bin/www_bget?ko:K01640">K01640</a>  E4.1.3.4, HMGCL, hmgL; hydroxymethylglutaryl-CoA lyase [EC:4.1.3.4]
C    01008 Polyketide biosynthesis proteins [BR:ko01008]
C    01052 Type I polyketide structures [PATH:<a href="http://www.kegg.jp/kegg-bin/show_pathway?@ko01052">ko01052</a>]
C    00522 Biosynthesis of 12-, 14- and 16-membered macrolides [PATH:<a href="http://www.kegg.jp/kegg-bin/show_pathway?@ko00522">ko00522</a>]
C    01051 Biosynthesis of ansamycins [PATH:<a href="http://www.kegg.jp/kegg-bin/show_pathway?@ko01051/K00615">ko01051</a>]
D      comp58063_c1_seq3; <a href="/dbget-bin/www_bget?ko:K00615">K00615</a>  E2.2.1.1, tktA, tktB; transketolase [EC:2.2.1.1]
C    01056 Biosynthesis of type II polyketide backbone [PATH:<a href="http://www.kegg.jp/kegg-bin/show_pathway?@ko01056">ko01056</a>]
C    01057 Biosynthesis of type II polyketide products [PATH:<a href="http://www.kegg.jp/kegg-bin/show_pathway?@ko01057">ko01057</a>]
C    00253 Tetracycline biosynthesis [PATH:<a href="http://www.kegg.jp/kegg-bin/show_pathway?@ko00253/K01962/K02160/K01961/K01963">ko00253</a>]
D      comp58271_c1_seq2; <a href="/dbget-bin/www_bget?ko:K01962">K01962</a>  accA; acetyl-CoA carboxylase carboxyl transferase subunit alpha [EC:6.4.1.2]
D      comp53156_c0_seq1; <a href="/dbget-bin/www_bget?ko:K02160">K02160</a>  accB, bccP; acetyl-CoA carboxylase biotin carboxyl carrier protein
D      comp44215_c0_seq1; <a href="/dbget-bin/www_bget?ko:K01961">K01961</a>  accC; acetyl-CoA carboxylase, biotin carboxylase subunit [EC:6.4.1.2 6.3.4.14]
D      comp29918_c0_seq1; <a href="/dbget-bin/www_bget?ko:K01963">K01963</a>  accD; acetyl-CoA carboxylase carboxyl transferase subunit beta [EC:6.4.1.2]
C    00523 Polyketide sugar unit biosynthesis [PATH:<a href="http://www.kegg.jp/kegg-bin/show_pathway?@ko00523/K12451">ko00523</a>]
D      comp47282_c0_seq2; <a href="/dbget-bin/www_bget?ko:K12451">K12451</a>  UER1; 3,5-epimerase/4-reductase [EC:5.1.3.- 1.1.1.-]
C    01054 Nonribosomal peptide structures [PATH:<a href="http://www.kegg.jp/kegg-bin/show_pathway?@ko01054">ko01054</a>]
C    01053 Biosynthesis of siderophore group nonribosomal peptides [PATH:<a href="http://www.kegg.jp/kegg-bin/show_pathway?@ko01053/K02552">ko01053</a>]
D      comp59136_c0_seq72; <a href="/dbget-bin/www_bget?ko:K02552">K02552</a>  menF; menaquinone-specific isochorismate synthase [EC:5.4.4.2]
C    01055 Biosynthesis of vancomycin group antibiotics [PATH:<a href="http://www.kegg.jp/kegg-bin/show_pathway?@ko01055">ko01055</a>]
B
B  <b>Biosynthesis of other secondary metabolites</b>
C    00940 Phenylpropanoid biosynthesis [PATH:<a href="http://www.kegg.jp/kegg-bin/show_pathway?@ko00940/K10775/K01188/K05349/K05350/K01904/K09753/K00487/K12355/K00083/K11188/K00430/K12356/K09754/K00588/K09755">ko00940</a>]
D      comp56396_c1_seq4; <a href="/dbget-bin/www_bget?ko:K10775">K10775</a>  E4.3.1.24; phenylalanine ammonia-lyase [EC:4.3.1.24]
D      comp27577_c0_seq1; <a href="/dbget-bin/www_bget?ko:K01188">K01188</a>  E3.2.1.21; beta-glucosidase [EC:3.2.1.21]
D      comp47947_c0_seq4; <a href="/dbget-bin/www_bget?ko:K01188">K01188</a>  E3.2.1.21; beta-glucosidase [EC:3.2.1.21]
D      comp49777_c0_seq4; <a href="/dbget-bin/www_bget?ko:K01188">K01188</a>  E3.2.1.21; beta-glucosidase [EC:3.2.1.21]
D      comp51328_c0_seq2; <a href="/dbget-bin/www_bget?ko:K01188">K01188</a>  E3.2.1.21; beta-glucosidase [EC:3.2.1.21]
D      comp51453_c0_seq2; <a href="/dbget-bin/www_bget?ko:K01188">K01188</a>  E3.2.1.21; beta-glucosidase [EC:3.2.1.21]
D      comp54563_c0_seq1; <a href="/dbget-bin/www_bget?ko:K01188">K01188</a>  E3.2.1.21; beta-glucosidase [EC:3.2.1.21]
D      comp55414_c0_seq17; <a href="/dbget-bin/www_bget?ko:K01188">K01188</a>  E3.2.1.21; beta-glucosidase [EC:3.2.1.21]
D      comp57588_c2_seq3; <a href="/dbget-bin/www_bget?ko:K01188">K01188</a>  E3.2.1.21; beta-glucosidase [EC:3.2.1.21]
D      comp58384_c0_seq10; <a href="/dbget-bin/www_bget?ko:K01188">K01188</a>  E3.2.1.21; beta-glucosidase [EC:3.2.1.21]
D      comp51037_c0_seq1; <a href="/dbget-bin/www_bget?ko:K05349">K05349</a>  bglX; beta-glucosidase [EC:3.2.1.21]
D      comp58288_c0_seq8; <a href="/dbget-bin/www_bget?ko:K05349">K05349</a>  bglX; beta-glucosidase [EC:3.2.1.21]
D      comp58969_c0_seq2; <a href="/dbget-bin/www_bget?ko:K05349">K05349</a>  bglX; beta-glucosidase [EC:3.2.1.21]
D      comp59623_c0_seq5; <a href="/dbget-bin/www_bget?ko:K05349">K05349</a>  bglX; beta-glucosidase [EC:3.2.1.21]
D      comp51564_c0_seq4; <a href="/dbget-bin/www_bget?ko:K05350">K05350</a>  bglB; beta-glucosidase [EC:3.2.1.21]
D      comp52535_c0_seq10; <a href="/dbget-bin/www_bget?ko:K05350">K05350</a>  bglB; beta-glucosidase [EC:3.2.1.21]
D      comp55523_c0_seq1; <a href="/dbget-bin/www_bget?ko:K05350">K05350</a>  bglB; beta-glucosidase [EC:3.2.1.21]
D      comp49103_c0_seq1; <a href="/dbget-bin/www_bget?ko:K01904">K01904</a>  E6.2.1.12; 4-coumarate--CoA ligase [EC:6.2.1.12]
D      comp52962_c0_seq1; <a href="/dbget-bin/www_bget?ko:K01904">K01904</a>  E6.2.1.12; 4-coumarate--CoA ligase [EC:6.2.1.12]
D      comp55330_c0_seq3; <a href="/dbget-bin/www_bget?ko:K01904">K01904</a>  E6.2.1.12; 4-coumarate--CoA ligase [EC:6.2.1.12]
D      comp58010_c0_seq1; <a href="/dbget-bin/www_bget?ko:K01904">K01904</a>  E6.2.1.12; 4-coumarate--CoA ligase [EC:6.2.1.12]
D      comp59299_c0_seq10; <a href="/dbget-bin/www_bget?ko:K01904">K01904</a>  E6.2.1.12; 4-coumarate--CoA ligase [EC:6.2.1.12]
D      comp50110_c0_seq1; <a href="/dbget-bin/www_bget?ko:K09753">K09753</a>  CCR; cinnamoyl-CoA reductase [EC:1.2.1.44]
D      comp56960_c0_seq4; <a href="/dbget-bin/www_bget?ko:K00487">K00487</a>  CYP73A; trans-cinnamate 4-monooxygenase [EC:1.14.13.11]
D      comp136573_c0_seq1; <a href="/dbget-bin/www_bget?ko:K00487">K00487</a>  CYP73A; trans-cinnamate 4-monooxygenase [EC:1.14.13.11]
D      comp53593_c0_seq4; <a href="/dbget-bin/www_bget?ko:K12355">K12355</a>  REF1; coniferyl-aldehyde dehydrogenase [EC:1.2.1.68]
D      comp40242_c0_seq3; <a href="/dbget-bin/www_bget?ko:K00083">K00083</a>  E1.1.1.195; cinnamyl-alcohol dehydrogenase [EC:1.1.1.195]
D      comp50648_c1_seq2; <a href="/dbget-bin/www_bget?ko:K00083">K00083</a>  E1.1.1.195; cinnamyl-alcohol dehydrogenase [EC:1.1.1.195]
D      comp53168_c0_seq2; <a href="/dbget-bin/www_bget?ko:K00083">K00083</a>  E1.1.1.195; cinnamyl-alcohol dehydrogenase [EC:1.1.1.195]
D      comp3824_c0_seq1; <a href="/dbget-bin/www_bget?ko:K11188">K11188</a>  PRDX6; peroxiredoxin 6, 1-Cys peroxiredoxin [EC:1.11.1.7 1.11.1.15 3.1.1.-]
D      comp32598_c0_seq1; <a href="/dbget-bin/www_bget?ko:K00430">K00430</a>  E1.11.1.7; peroxidase [EC:1.11.1.7]
D      comp36584_c0_seq2; <a href="/dbget-bin/www_bget?ko:K00430">K00430</a>  E1.11.1.7; peroxidase [EC:1.11.1.7]
D      comp36706_c0_seq1; <a href="/dbget-bin/www_bget?ko:K00430">K00430</a>  E1.11.1.7; peroxidase [EC:1.11.1.7]
D      comp37303_c0_seq1; <a href="/dbget-bin/www_bget?ko:K00430">K00430</a>  E1.11.1.7; peroxidase [EC:1.11.1.7]
D      comp44799_c0_seq1; <a href="/dbget-bin/www_bget?ko:K00430">K00430</a>  E1.11.1.7; peroxidase [EC:1.11.1.7]
D      comp45215_c0_seq1; <a href="/dbget-bin/www_bget?ko:K00430">K00430</a>  E1.11.1.7; peroxidase [EC:1.11.1.7]
D      comp45835_c0_seq1; <a href="/dbget-bin/www_bget?ko:K00430">K00430</a>  E1.11.1.7; peroxidase [EC:1.11.1.7]
D      comp46211_c0_seq1; <a href="/dbget-bin/www_bget?ko:K00430">K00430</a>  E1.11.1.7; peroxidase [EC:1.11.1.7]
D      comp47547_c0_seq1; <a href="/dbget-bin/www_bget?ko:K00430">K00430</a>  E1.11.1.7; peroxidase [EC:1.11.1.7]
D      comp47885_c0_seq2; <a href="/dbget-bin/www_bget?ko:K00430">K00430</a>  E1.11.1.7; peroxidase [EC:1.11.1.7]
D      comp47960_c0_seq2; <a href="/dbget-bin/www_bget?ko:K00430">K00430</a>  E1.11.1.7; peroxidase [EC:1.11.1.7]
D      comp48112_c0_seq4; <a href="/dbget-bin/www_bget?ko:K00430">K00430</a>  E1.11.1.7; peroxidase [EC:1.11.1.7]
D      comp48350_c0_seq1; <a href="/dbget-bin/www_bget?ko:K00430">K00430</a>  E1.11.1.7; peroxidase [EC:1.11.1.7]
D      comp49406_c1_seq1; <a href="/dbget-bin/www_bget?ko:K00430">K00430</a>  E1.11.1.7; peroxidase [EC:1.11.1.7]
D      comp50278_c0_seq1; <a href="/dbget-bin/www_bget?ko:K00430">K00430</a>  E1.11.1.7; peroxidase [EC:1.11.1.7]
D      comp50387_c0_seq1; <a href="/dbget-bin/www_bget?ko:K00430">K00430</a>  E1.11.1.7; peroxidase [EC:1.11.1.7]
D      comp50963_c0_seq1; <a href="/dbget-bin/www_bget?ko:K00430">K00430</a>  E1.11.1.7; peroxidase [EC:1.11.1.7]
D      comp51291_c0_seq1; <a href="/dbget-bin/www_bget?ko:K00430">K00430</a>  E1.11.1.7; peroxidase [EC:1.11.1.7]
D      comp53012_c0_seq2; <a href="/dbget-bin/www_bget?ko:K00430">K00430</a>  E1.11.1.7; peroxidase [EC:1.11.1.7]
D      comp53238_c0_seq2; <a href="/dbget-bin/www_bget?ko:K00430">K00430</a>  E1.11.1.7; peroxidase [EC:1.11.1.7]
D      comp54569_c0_seq2; <a href="/dbget-bin/www_bget?ko:K00430">K00430</a>  E1.11.1.7; peroxidase [EC:1.11.1.7]
D      comp55820_c0_seq1; <a href="/dbget-bin/www_bget?ko:K00430">K00430</a>  E1.11.1.7; peroxidase [EC:1.11.1.7]
D      comp55992_c0_seq3; <a href="/dbget-bin/www_bget?ko:K00430">K00430</a>  E1.11.1.7; peroxidase [EC:1.11.1.7]
D      comp56861_c0_seq2; <a href="/dbget-bin/www_bget?ko:K00430">K00430</a>  E1.11.1.7; peroxidase [EC:1.11.1.7]
D      comp59289_c1_seq1; <a href="/dbget-bin/www_bget?ko:K00430">K00430</a>  E1.11.1.7; peroxidase [EC:1.11.1.7]
D      comp29891_c0_seq1; <a href="/dbget-bin/www_bget?ko:K12356">K12356</a>  UGT72E; coniferyl-alcohol glucosyltransferase [EC:2.4.1.111]
D      comp53851_c0_seq1; <a href="/dbget-bin/www_bget?ko:K09754">K09754</a>  CYP98A3, C3'H; coumaroylquinate(coumaroylshikimate) 3'-monooxygenase [EC:1.14.13.36]
D      comp38729_c0_seq1; <a href="/dbget-bin/www_bget?ko:K00588">K00588</a>  E2.1.1.104; caffeoyl-CoA O-methyltransferase [EC:2.1.1.104]
D      comp43261_c0_seq1; <a href="/dbget-bin/www_bget?ko:K00588">K00588</a>  E2.1.1.104; caffeoyl-CoA O-methyltransferase [EC:2.1.1.104]
D      comp48635_c0_seq1; <a href="/dbget-bin/www_bget?ko:K00588">K00588</a>  E2.1.1.104; caffeoyl-CoA O-methyltransferase [EC:2.1.1.104]
D      comp54213_c1_seq1; <a href="/dbget-bin/www_bget?ko:K09755">K09755</a>  CYP84A, F5H; ferulate-5-hydroxylase [EC:1.14.-.-]
C    00945 Stilbenoid, diarylheptanoid and gingerol biosynthesis [PATH:<a href="http://www.kegg.jp/kegg-bin/show_pathway?@ko00945/K00487/K00517/K09754/K00588">ko00945</a>]
D      comp56960_c0_seq4; <a href="/dbget-bin/www_bget?ko:K00487">K00487</a>  CYP73A; trans-cinnamate 4-monooxygenase [EC:1.14.13.11]
D      comp136573_c0_seq1; <a href="/dbget-bin/www_bget?ko:K00487">K00487</a>  CYP73A; trans-cinnamate 4-monooxygenase [EC:1.14.13.11]
D      comp36755_c0_seq1; <a href="/dbget-bin/www_bget?ko:K00517">K00517</a>  E1.14.-.-;  [EC:1.14.-.-]
D      comp37009_c0_seq2; <a href="/dbget-bin/www_bget?ko:K00517">K00517</a>  E1.14.-.-;  [EC:1.14.-.-]
D      comp40234_c0_seq2; <a href="/dbget-bin/www_bget?ko:K00517">K00517</a>  E1.14.-.-;  [EC:1.14.-.-]
D      comp42811_c0_seq2; <a href="/dbget-bin/www_bget?ko:K00517">K00517</a>  E1.14.-.-;  [EC:1.14.-.-]
D      comp44874_c0_seq1; <a href="/dbget-bin/www_bget?ko:K00517">K00517</a>  E1.14.-.-;  [EC:1.14.-.-]
D      comp47857_c0_seq1; <a href="/dbget-bin/www_bget?ko:K00517">K00517</a>  E1.14.-.-;  [EC:1.14.-.-]
D      comp49639_c0_seq2; <a href="/dbget-bin/www_bget?ko:K00517">K00517</a>  E1.14.-.-;  [EC:1.14.-.-]
D      comp49988_c0_seq1; <a href="/dbget-bin/www_bget?ko:K00517">K00517</a>  E1.14.-.-;  [EC:1.14.-.-]
D      comp50552_c0_seq2; <a href="/dbget-bin/www_bget?ko:K00517">K00517</a>  E1.14.-.-;  [EC:1.14.-.-]
D      comp51602_c0_seq1; <a href="/dbget-bin/www_bget?ko:K00517">K00517</a>  E1.14.-.-;  [EC:1.14.-.-]
D      comp52391_c1_seq1; <a href="/dbget-bin/www_bget?ko:K00517">K00517</a>  E1.14.-.-;  [EC:1.14.-.-]
D      comp54276_c0_seq1; <a href="/dbget-bin/www_bget?ko:K00517">K00517</a>  E1.14.-.-;  [EC:1.14.-.-]
D      comp57143_c0_seq1; <a href="/dbget-bin/www_bget?ko:K00517">K00517</a>  E1.14.-.-;  [EC:1.14.-.-]
D      comp58625_c0_seq1; <a href="/dbget-bin/www_bget?ko:K00517">K00517</a>  E1.14.-.-;  [EC:1.14.-.-]
D      comp58738_c1_seq3; <a href="/dbget-bin/www_bget?ko:K00517">K00517</a>  E1.14.-.-;  [EC:1.14.-.-]
D      comp53851_c0_seq1; <a href="/dbget-bin/www_bget?ko:K09754">K09754</a>  CYP98A3, C3'H; coumaroylquinate(coumaroylshikimate) 3'-monooxygenase [EC:1.14.13.36]
D      comp38729_c0_seq1; <a href="/dbget-bin/www_bget?ko:K00588">K00588</a>  E2.1.1.104; caffeoyl-CoA O-methyltransferase [EC:2.1.1.104]
D      comp43261_c0_seq1; <a href="/dbget-bin/www_bget?ko:K00588">K00588</a>  E2.1.1.104; caffeoyl-CoA O-methyltransferase [EC:2.1.1.104]
D      comp48635_c0_seq1; <a href="/dbget-bin/www_bget?ko:K00588">K00588</a>  E2.1.1.104; caffeoyl-CoA O-methyltransferase [EC:2.1.1.104]
C    00941 Flavonoid biosynthesis [PATH:<a href="http://www.kegg.jp/kegg-bin/show_pathway?@ko00941/K00660/K01859/K00475/K05278/K00487/K05280/K05277/K08695/K13081/K09754/K13082/K00588">ko00941</a>]
D      comp46883_c0_seq1; <a href="/dbget-bin/www_bget?ko:K00660">K00660</a>  CHS; chalcone synthase [EC:2.3.1.74]
D      comp54087_c0_seq5; <a href="/dbget-bin/www_bget?ko:K00660">K00660</a>  CHS; chalcone synthase [EC:2.3.1.74]
D      comp44268_c0_seq1; <a href="/dbget-bin/www_bget?ko:K01859">K01859</a>  E5.5.1.6; chalcone isomerase [EC:5.5.1.6]
D      comp47420_c0_seq2; <a href="/dbget-bin/www_bget?ko:K00475">K00475</a>  E1.14.11.9; naringenin 3-dioxygenase [EC:1.14.11.9]
D      comp44110_c0_seq1; <a href="/dbget-bin/www_bget?ko:K05278">K05278</a>  FLS; flavonol synthase [EC:1.14.11.23]
D      comp56960_c0_seq4; <a href="/dbget-bin/www_bget?ko:K00487">K00487</a>  CYP73A; trans-cinnamate 4-monooxygenase [EC:1.14.13.11]
D      comp136573_c0_seq1; <a href="/dbget-bin/www_bget?ko:K00487">K00487</a>  CYP73A; trans-cinnamate 4-monooxygenase [EC:1.14.13.11]
D      comp62841_c0_seq1; <a href="/dbget-bin/www_bget?ko:K05280">K05280</a>  E1.14.13.21; flavonoid 3'-monooxygenase [EC:1.14.13.21]
D      comp47009_c0_seq1; <a href="/dbget-bin/www_bget?ko:K05277">K05277</a>  E1.14.11.19; leucoanthocyanidin dioxygenase [EC:1.14.11.19]
D      comp51590_c0_seq7; <a href="/dbget-bin/www_bget?ko:K08695">K08695</a>  E1.3.1.77; anthocyanidin reductase [EC:1.3.1.77]
D      comp49435_c0_seq1; <a href="/dbget-bin/www_bget?ko:K13081">K13081</a>  LAR; leucoanthocyanidin reductase [EC:1.17.1.3]
D      comp53851_c0_seq1; <a href="/dbget-bin/www_bget?ko:K09754">K09754</a>  CYP98A3, C3'H; coumaroylquinate(coumaroylshikimate) 3'-monooxygenase [EC:1.14.13.36]
D      comp59017_c0_seq3; <a href="/dbget-bin/www_bget?ko:K13082">K13082</a>  DFR; bifunctional dihydroflavonol 4-reductase/flavanone 4-reductase [EC:1.1.1.219 1.1.1.234]
D      comp38729_c0_seq1; <a href="/dbget-bin/www_bget?ko:K00588">K00588</a>  E2.1.1.104; caffeoyl-CoA O-methyltransferase [EC:2.1.1.104]
D      comp43261_c0_seq1; <a href="/dbget-bin/www_bget?ko:K00588">K00588</a>  E2.1.1.104; caffeoyl-CoA O-methyltransferase [EC:2.1.1.104]
D      comp48635_c0_seq1; <a href="/dbget-bin/www_bget?ko:K00588">K00588</a>  E2.1.1.104; caffeoyl-CoA O-methyltransferase [EC:2.1.1.104]
C    00944 Flavone and flavonol biosynthesis [PATH:<a href="http://www.kegg.jp/kegg-bin/show_pathway?@ko00944/K05280/K05279">ko00944</a>]
D      comp62841_c0_seq1; <a href="/dbget-bin/www_bget?ko:K05280">K05280</a>  E1.14.13.21; flavonoid 3'-monooxygenase [EC:1.14.13.21]
D      comp27454_c0_seq1; <a href="/dbget-bin/www_bget?ko:K05279">K05279</a>  E2.1.1.76; flavonol 3-O-methyltransferase [EC:2.1.1.76]
C    00942 Anthocyanin biosynthesis [PATH:<a href="http://www.kegg.jp/kegg-bin/show_pathway?@ko00942/K17193">ko00942</a>]
D      comp4241_c0_seq1; <a href="/dbget-bin/www_bget?ko:K17193">K17193</a>  UGT79B1; anthocyanidin 3-O-glucoside 2'''-O-xylosyltransferase [EC:2.4.2.51]
C    00943 Isoflavonoid biosynthesis [PATH:<a href="http://www.kegg.jp/kegg-bin/show_pathway?@ko00943">ko00943</a>]
C    00901 Indole alkaloid biosynthesis [PATH:<a href="http://www.kegg.jp/kegg-bin/show_pathway?@ko00901/K08233">ko00901</a>]
D      comp51711_c0_seq6; <a href="/dbget-bin/www_bget?ko:K08233">K08233</a>  E3.1.1.78; polyneuridine-aldehyde esterase [EC:3.1.1.78]
C    00950 Isoquinoline alkaloid biosynthesis [PATH:<a href="http://www.kegg.jp/kegg-bin/show_pathway?@ko00950/K14454/K14455/K00811/K15849/K00815/K01592/K00276">ko00950</a>]
D      comp44326_c0_seq1; <a href="/dbget-bin/www_bget?ko:K14454">K14454</a>  GOT1; aspartate aminotransferase, cytoplasmic [EC:2.6.1.1]
D      comp52813_c2_seq3; <a href="/dbget-bin/www_bget?ko:K14455">K14455</a>  GOT2; aspartate aminotransferase, mitochondrial [EC:2.6.1.1]
D      comp41956_c0_seq1; <a href="/dbget-bin/www_bget?ko:K00811">K00811</a>  ASP5; aspartate aminotransferase, chloroplastic [EC:2.6.1.1]
D      comp59013_c0_seq9; <a href="/dbget-bin/www_bget?ko:K15849">K15849</a>  PAT, AAT; bifunctional aspartate aminotransferase and glutamate/aspartate-prephenate aminotransferase [EC:2.6.1.1 2.6.1.78 2.6.1.79]
D      comp47482_c0_seq4; <a href="/dbget-bin/www_bget?ko:K00815">K00815</a>  TAT; tyrosine aminotransferase [EC:2.6.1.5]
D      comp52735_c0_seq3; <a href="/dbget-bin/www_bget?ko:K00815">K00815</a>  TAT; tyrosine aminotransferase [EC:2.6.1.5]
D      comp48319_c0_seq1; <a href="/dbget-bin/www_bget?ko:K01592">K01592</a>  E4.1.1.25; tyrosine decarboxylase [EC:4.1.1.25]
D      comp53571_c0_seq9; <a href="/dbget-bin/www_bget?ko:K01592">K01592</a>  E4.1.1.25; tyrosine decarboxylase [EC:4.1.1.25]
D      comp59824_c3_seq3; <a href="/dbget-bin/www_bget?ko:K00276">K00276</a>  E1.4.3.21, AOC2, AOC3, tynA; primary-amine oxidase [EC:1.4.3.21]
C    00960 Tropane, piperidine and pyridine alkaloid biosynthesis [PATH:<a href="http://www.kegg.jp/kegg-bin/show_pathway?@ko00960/K00276/K08081/K14454/K14455/K00811/K15849/K00815/K00817">ko00960</a>]
D      comp59824_c3_seq3; <a href="/dbget-bin/www_bget?ko:K00276">K00276</a>  E1.4.3.21, AOC2, AOC3, tynA; primary-amine oxidase [EC:1.4.3.21]
D      comp45230_c0_seq2; <a href="/dbget-bin/www_bget?ko:K08081">K08081</a>  E1.1.1.206; tropine dehydrogenase [EC:1.1.1.206]
D      comp55636_c0_seq15; <a href="/dbget-bin/www_bget?ko:K08081">K08081</a>  E1.1.1.206; tropine dehydrogenase [EC:1.1.1.206]
D      comp44326_c0_seq1; <a href="/dbget-bin/www_bget?ko:K14454">K14454</a>  GOT1; aspartate aminotransferase, cytoplasmic [EC:2.6.1.1]
D      comp52813_c2_seq3; <a href="/dbget-bin/www_bget?ko:K14455">K14455</a>  GOT2; aspartate aminotransferase, mitochondrial [EC:2.6.1.1]
D      comp41956_c0_seq1; <a href="/dbget-bin/www_bget?ko:K00811">K00811</a>  ASP5; aspartate aminotransferase, chloroplastic [EC:2.6.1.1]
D      comp59013_c0_seq9; <a href="/dbget-bin/www_bget?ko:K15849">K15849</a>  PAT, AAT; bifunctional aspartate aminotransferase and glutamate/aspartate-prephenate aminotransferase [EC:2.6.1.1 2.6.1.78 2.6.1.79]
D      comp47482_c0_seq4; <a href="/dbget-bin/www_bget?ko:K00815">K00815</a>  TAT; tyrosine aminotransferase [EC:2.6.1.5]
D      comp52735_c0_seq3; <a href="/dbget-bin/www_bget?ko:K00815">K00815</a>  TAT; tyrosine aminotransferase [EC:2.6.1.5]
D      comp57622_c0_seq1; <a href="/dbget-bin/www_bget?ko:K00817">K00817</a>  hisC; histidinol-phosphate aminotransferase [EC:2.6.1.9]
C    01058 Acridone alkaloid biosynthesis [PATH:<a href="http://www.kegg.jp/kegg-bin/show_pathway?@ko01058">ko01058</a>]
C    00232 Caffeine metabolism [PATH:<a href="http://www.kegg.jp/kegg-bin/show_pathway?@ko00232/K00106/K00365">ko00232</a>]
D      comp50536_c0_seq3; <a href="/dbget-bin/www_bget?ko:K00106">K00106</a>  XDH; xanthine dehydrogenase/oxidase [EC:1.17.1.4 1.17.3.2]
D      comp57440_c4_seq2; <a href="/dbget-bin/www_bget?ko:K00365">K00365</a>  E1.7.3.3; urate oxidase [EC:1.7.3.3]
C    00965 Betalain biosynthesis [PATH:<a href="http://www.kegg.jp/kegg-bin/show_pathway?@ko00965/K15777">ko00965</a>]
D      comp40147_c0_seq1; <a href="/dbget-bin/www_bget?ko:K15777">K15777</a>  DOPA; 4,5-DOPA dioxygenase extradiol [EC:1.13.11.-]
C    00966 Glucosinolate biosynthesis [PATH:<a href="http://www.kegg.jp/kegg-bin/show_pathway?@ko00966/K11818/K11812">ko00966</a>]
D      comp53580_c0_seq1; <a href="/dbget-bin/www_bget?ko:K11818">K11818</a>  CYP83B1; cytochrome P450, family 83, subfamily B, polypeptide 1 [EC:1.14.-.-]
D      comp57249_c0_seq3; <a href="/dbget-bin/www_bget?ko:K11818">K11818</a>  CYP83B1; cytochrome P450, family 83, subfamily B, polypeptide 1 [EC:1.14.-.-]
D      comp142585_c0_seq1; <a href="/dbget-bin/www_bget?ko:K11812">K11812</a>  CYP79B2; cytochrome P450, family 79, subfamily B, polypeptide 2 (tryptophan N-monooxygenase) [EC:1.14.13.125]
C    00402 Benzoxazinoid biosynthesis [PATH:<a href="http://www.kegg.jp/kegg-bin/show_pathway?@ko00402">ko00402</a>]
C    00311 Penicillin and cephalosporin biosynthesis [PATH:<a href="http://www.kegg.jp/kegg-bin/show_pathway?@ko00311">ko00311</a>]
C    00312 beta-Lactam resistance [PATH:<a href="http://www.kegg.jp/kegg-bin/show_pathway?@ko00312">ko00312</a>]
C    00521 Streptomycin biosynthesis [PATH:<a href="http://www.kegg.jp/kegg-bin/show_pathway?@ko00521/K00844/K01835/K01858/K01092">ko00521</a>]
D      comp48404_c0_seq4; <a href="/dbget-bin/www_bget?ko:K00844">K00844</a>  HK; hexokinase [EC:2.7.1.1]
D      comp51148_c0_seq2; <a href="/dbget-bin/www_bget?ko:K00844">K00844</a>  HK; hexokinase [EC:2.7.1.1]
D      comp57111_c1_seq1; <a href="/dbget-bin/www_bget?ko:K00844">K00844</a>  HK; hexokinase [EC:2.7.1.1]
D      comp57637_c0_seq3; <a href="/dbget-bin/www_bget?ko:K00844">K00844</a>  HK; hexokinase [EC:2.7.1.1]
D      comp42135_c0_seq1; <a href="/dbget-bin/www_bget?ko:K01835">K01835</a>  pgm; phosphoglucomutase [EC:5.4.2.2]
D      comp51508_c0_seq1; <a href="/dbget-bin/www_bget?ko:K01835">K01835</a>  pgm; phosphoglucomutase [EC:5.4.2.2]
D      comp56916_c0_seq1; <a href="/dbget-bin/www_bget?ko:K01858">K01858</a>  E5.5.1.4, INO1; myo-inositol-1-phosphate synthase [EC:5.5.1.4]
D      comp60128_c1_seq1; <a href="/dbget-bin/www_bget?ko:K01092">K01092</a>  E3.1.3.25, IMPA, suhB; myo-inositol-1(or 4)-monophosphatase [EC:3.1.3.25]
C    00524 Butirosin and neomycin biosynthesis [PATH:<a href="http://www.kegg.jp/kegg-bin/show_pathway?@ko00524/K00844">ko00524</a>]
D      comp48404_c0_seq4; <a href="/dbget-bin/www_bget?ko:K00844">K00844</a>  HK; hexokinase [EC:2.7.1.1]
D      comp51148_c0_seq2; <a href="/dbget-bin/www_bget?ko:K00844">K00844</a>  HK; hexokinase [EC:2.7.1.1]
D      comp57111_c1_seq1; <a href="/dbget-bin/www_bget?ko:K00844">K00844</a>  HK; hexokinase [EC:2.7.1.1]
D      comp57637_c0_seq3; <a href="/dbget-bin/www_bget?ko:K00844">K00844</a>  HK; hexokinase [EC:2.7.1.1]
C    00331 Clavulanic acid biosynthesis [PATH:<a href="http://www.kegg.jp/kegg-bin/show_pathway?@ko00331">ko00331</a>]
C    00231 Puromycin biosynthesis [PATH:<a href="http://www.kegg.jp/kegg-bin/show_pathway?@ko00231">ko00231</a>]
C    00401 Novobiocin biosynthesis [PATH:<a href="http://www.kegg.jp/kegg-bin/show_pathway?@ko00401/K00815/K00817">ko00401</a>]
D      comp47482_c0_seq4; <a href="/dbget-bin/www_bget?ko:K00815">K00815</a>  TAT; tyrosine aminotransferase [EC:2.6.1.5]
D      comp52735_c0_seq3; <a href="/dbget-bin/www_bget?ko:K00815">K00815</a>  TAT; tyrosine aminotransferase [EC:2.6.1.5]
D      comp57622_c0_seq1; <a href="/dbget-bin/www_bget?ko:K00817">K00817</a>  hisC; histidinol-phosphate aminotransferase [EC:2.6.1.9]
B
B  <b>Xenobiotics biodegradation and metabolism</b>
C    00362 Benzoate degradation [PATH:<a href="http://www.kegg.jp/kegg-bin/show_pathway?@ko00362/K07513/K00074/K00626">ko00362</a>]
D      comp31526_c0_seq1; <a href="/dbget-bin/www_bget?ko:K07513">K07513</a>  ACAA1; acetyl-CoA acyltransferase 1 [EC:2.3.1.16]
D      comp49594_c0_seq1; <a href="/dbget-bin/www_bget?ko:K07513">K07513</a>  ACAA1; acetyl-CoA acyltransferase 1 [EC:2.3.1.16]
D      comp48614_c0_seq1; <a href="/dbget-bin/www_bget?ko:K00074">K00074</a>  paaH, hbd, fadB, mmgB; 3-hydroxybutyryl-CoA dehydrogenase [EC:1.1.1.157]
D      comp55836_c0_seq2; <a href="/dbget-bin/www_bget?ko:K00626">K00626</a>  E2.3.1.9, atoB; acetyl-CoA C-acetyltransferase [EC:2.3.1.9]
D      comp58238_c0_seq1; <a href="/dbget-bin/www_bget?ko:K00626">K00626</a>  E2.3.1.9, atoB; acetyl-CoA C-acetyltransferase [EC:2.3.1.9]
C    00627 Aminobenzoate degradation [PATH:<a href="http://www.kegg.jp/kegg-bin/show_pathway?@ko00627/K01512/K00517/K01078/K01113">ko00627</a>]
D      comp54883_c0_seq11; <a href="/dbget-bin/www_bget?ko:K01512">K01512</a>  acyP; acylphosphatase [EC:3.6.1.7]
D      comp36755_c0_seq1; <a href="/dbget-bin/www_bget?ko:K00517">K00517</a>  E1.14.-.-;  [EC:1.14.-.-]
D      comp37009_c0_seq2; <a href="/dbget-bin/www_bget?ko:K00517">K00517</a>  E1.14.-.-;  [EC:1.14.-.-]
D      comp40234_c0_seq2; <a href="/dbget-bin/www_bget?ko:K00517">K00517</a>  E1.14.-.-;  [EC:1.14.-.-]
D      comp42811_c0_seq2; <a href="/dbget-bin/www_bget?ko:K00517">K00517</a>  E1.14.-.-;  [EC:1.14.-.-]
D      comp44874_c0_seq1; <a href="/dbget-bin/www_bget?ko:K00517">K00517</a>  E1.14.-.-;  [EC:1.14.-.-]
D      comp47857_c0_seq1; <a href="/dbget-bin/www_bget?ko:K00517">K00517</a>  E1.14.-.-;  [EC:1.14.-.-]
D      comp49639_c0_seq2; <a href="/dbget-bin/www_bget?ko:K00517">K00517</a>  E1.14.-.-;  [EC:1.14.-.-]
D      comp49988_c0_seq1; <a href="/dbget-bin/www_bget?ko:K00517">K00517</a>  E1.14.-.-;  [EC:1.14.-.-]
D      comp50552_c0_seq2; <a href="/dbget-bin/www_bget?ko:K00517">K00517</a>  E1.14.-.-;  [EC:1.14.-.-]
D      comp51602_c0_seq1; <a href="/dbget-bin/www_bget?ko:K00517">K00517</a>  E1.14.-.-;  [EC:1.14.-.-]
D      comp52391_c1_seq1; <a href="/dbget-bin/www_bget?ko:K00517">K00517</a>  E1.14.-.-;  [EC:1.14.-.-]
D      comp54276_c0_seq1; <a href="/dbget-bin/www_bget?ko:K00517">K00517</a>  E1.14.-.-;  [EC:1.14.-.-]
D      comp57143_c0_seq1; <a href="/dbget-bin/www_bget?ko:K00517">K00517</a>  E1.14.-.-;  [EC:1.14.-.-]
D      comp58625_c0_seq1; <a href="/dbget-bin/www_bget?ko:K00517">K00517</a>  E1.14.-.-;  [EC:1.14.-.-]
D      comp58738_c1_seq3; <a href="/dbget-bin/www_bget?ko:K00517">K00517</a>  E1.14.-.-;  [EC:1.14.-.-]
D      comp49150_c0_seq1; <a href="/dbget-bin/www_bget?ko:K01078">K01078</a>  E3.1.3.2; acid phosphatase [EC:3.1.3.2]
D      comp45778_c0_seq1; <a href="/dbget-bin/www_bget?ko:K01113">K01113</a>  phoD; alkaline phosphatase D [EC:3.1.3.1]
C    00364 Fluorobenzoate degradation [PATH:<a href="http://www.kegg.jp/kegg-bin/show_pathway?@ko00364/K01061">ko00364</a>]
D      comp51972_c0_seq1; <a href="/dbget-bin/www_bget?ko:K01061">K01061</a>  E3.1.1.45; carboxymethylenebutenolidase [EC:3.1.1.45]
C    00625 Chloroalkane and chloroalkene degradation [PATH:<a href="http://www.kegg.jp/kegg-bin/show_pathway?@ko00625/K00001/K00121/K00128">ko00625</a>]
D      comp46391_c0_seq6; <a href="/dbget-bin/www_bget?ko:K00001">K00001</a>  E1.1.1.1, adh; alcohol dehydrogenase [EC:1.1.1.1]
D      comp47846_c0_seq1; <a href="/dbget-bin/www_bget?ko:K00001">K00001</a>  E1.1.1.1, adh; alcohol dehydrogenase [EC:1.1.1.1]
D      comp55735_c0_seq2; <a href="/dbget-bin/www_bget?ko:K00001">K00001</a>  E1.1.1.1, adh; alcohol dehydrogenase [EC:1.1.1.1]
D      comp56151_c0_seq6; <a href="/dbget-bin/www_bget?ko:K00001">K00001</a>  E1.1.1.1, adh; alcohol dehydrogenase [EC:1.1.1.1]
D      comp32193_c0_seq3; <a href="/dbget-bin/www_bget?ko:K00121">K00121</a>  frmA, ADH5, adhC; S-(hydroxymethyl)glutathione dehydrogenase / alcohol dehydrogenase [EC:1.1.1.284 1.1.1.1]
D      comp55546_c0_seq1; <a href="/dbget-bin/www_bget?ko:K00121">K00121</a>  frmA, ADH5, adhC; S-(hydroxymethyl)glutathione dehydrogenase / alcohol dehydrogenase [EC:1.1.1.284 1.1.1.1]
D      comp44038_c0_seq3; <a href="/dbget-bin/www_bget?ko:K00128">K00128</a>  E1.2.1.3; aldehyde dehydrogenase (NAD+) [EC:1.2.1.3]
D      comp44097_c0_seq4; <a href="/dbget-bin/www_bget?ko:K00128">K00128</a>  E1.2.1.3; aldehyde dehydrogenase (NAD+) [EC:1.2.1.3]
D      comp49751_c0_seq2; <a href="/dbget-bin/www_bget?ko:K00128">K00128</a>  E1.2.1.3; aldehyde dehydrogenase (NAD+) [EC:1.2.1.3]
D      comp58228_c0_seq4; <a href="/dbget-bin/www_bget?ko:K00128">K00128</a>  E1.2.1.3; aldehyde dehydrogenase (NAD+) [EC:1.2.1.3]
D      comp58879_c2_seq1; <a href="/dbget-bin/www_bget?ko:K00128">K00128</a>  E1.2.1.3; aldehyde dehydrogenase (NAD+) [EC:1.2.1.3]
C    00361 Chlorocyclohexane and chlorobenzene degradation [PATH:<a href="http://www.kegg.jp/kegg-bin/show_pathway?@ko00361/K01061/K00224">ko00361</a>]
D      comp51972_c0_seq1; <a href="/dbget-bin/www_bget?ko:K01061">K01061</a>  E3.1.1.45; carboxymethylenebutenolidase [EC:3.1.1.45]
D      comp46052_c0_seq1; <a href="/dbget-bin/www_bget?ko:K00224">K00224</a>  E1.3.1.-;  [EC:1.3.1.-]
C    00623 Toluene degradation [PATH:<a href="http://www.kegg.jp/kegg-bin/show_pathway?@ko00623/K01061">ko00623</a>]
D      comp51972_c0_seq1; <a href="/dbget-bin/www_bget?ko:K01061">K01061</a>  E3.1.1.45; carboxymethylenebutenolidase [EC:3.1.1.45]
C    00622 Xylene degradation [PATH:<a href="http://www.kegg.jp/kegg-bin/show_pathway?@ko00622">ko00622</a>]
C    00633 Nitrotoluene degradation [PATH:<a href="http://www.kegg.jp/kegg-bin/show_pathway?@ko00633">ko00633</a>]
C    00642 Ethylbenzene degradation [PATH:<a href="http://www.kegg.jp/kegg-bin/show_pathway?@ko00642">ko00642</a>]
C    00643 Styrene degradation [PATH:<a href="http://www.kegg.jp/kegg-bin/show_pathway?@ko00643/K00451/K01800/K01555">ko00643</a>]
D      comp49715_c0_seq1; <a href="/dbget-bin/www_bget?ko:K00451">K00451</a>  HGD, hmgA; homogentisate 1,2-dioxygenase [EC:1.13.11.5]
D      comp57389_c0_seq5; <a href="/dbget-bin/www_bget?ko:K01800">K01800</a>  maiA, GSTZ1; maleylacetoacetate isomerase [EC:5.2.1.2]
D      comp46413_c0_seq1; <a href="/dbget-bin/www_bget?ko:K01555">K01555</a>  FAH, fahA; fumarylacetoacetase [EC:3.7.1.2]
C    00791 Atrazine degradation [PATH:<a href="http://www.kegg.jp/kegg-bin/show_pathway?@ko00791">ko00791</a>]
C    00930 Caprolactam degradation [PATH:<a href="http://www.kegg.jp/kegg-bin/show_pathway?@ko00930">ko00930</a>]
C    00351 1,1,1-Trichloro-2,2-bis(4-chlorophenyl)ethane (DDT) degradation [PATH:<a href="http://www.kegg.jp/kegg-bin/show_pathway?@ko00351/K00224">ko00351</a>]
D      comp46052_c0_seq1; <a href="/dbget-bin/www_bget?ko:K00224">K00224</a>  E1.3.1.-;  [EC:1.3.1.-]
C    00363 Bisphenol degradation [PATH:<a href="http://www.kegg.jp/kegg-bin/show_pathway?@ko00363/K00517">ko00363</a>]
D      comp36755_c0_seq1; <a href="/dbget-bin/www_bget?ko:K00517">K00517</a>  E1.14.-.-;  [EC:1.14.-.-]
D      comp37009_c0_seq2; <a href="/dbget-bin/www_bget?ko:K00517">K00517</a>  E1.14.-.-;  [EC:1.14.-.-]
D      comp40234_c0_seq2; <a href="/dbget-bin/www_bget?ko:K00517">K00517</a>  E1.14.-.-;  [EC:1.14.-.-]
D      comp42811_c0_seq2; <a href="/dbget-bin/www_bget?ko:K00517">K00517</a>  E1.14.-.-;  [EC:1.14.-.-]
D      comp44874_c0_seq1; <a href="/dbget-bin/www_bget?ko:K00517">K00517</a>  E1.14.-.-;  [EC:1.14.-.-]
D      comp47857_c0_seq1; <a href="/dbget-bin/www_bget?ko:K00517">K00517</a>  E1.14.-.-;  [EC:1.14.-.-]
D      comp49639_c0_seq2; <a href="/dbget-bin/www_bget?ko:K00517">K00517</a>  E1.14.-.-;  [EC:1.14.-.-]
D      comp49988_c0_seq1; <a href="/dbget-bin/www_bget?ko:K00517">K00517</a>  E1.14.-.-;  [EC:1.14.-.-]
D      comp50552_c0_seq2; <a href="/dbget-bin/www_bget?ko:K00517">K00517</a>  E1.14.-.-;  [EC:1.14.-.-]
D      comp51602_c0_seq1; <a href="/dbget-bin/www_bget?ko:K00517">K00517</a>  E1.14.-.-;  [EC:1.14.-.-]
D      comp52391_c1_seq1; <a href="/dbget-bin/www_bget?ko:K00517">K00517</a>  E1.14.-.-;  [EC:1.14.-.-]
D      comp54276_c0_seq1; <a href="/dbget-bin/www_bget?ko:K00517">K00517</a>  E1.14.-.-;  [EC:1.14.-.-]
D      comp57143_c0_seq1; <a href="/dbget-bin/www_bget?ko:K00517">K00517</a>  E1.14.-.-;  [EC:1.14.-.-]
D      comp58625_c0_seq1; <a href="/dbget-bin/www_bget?ko:K00517">K00517</a>  E1.14.-.-;  [EC:1.14.-.-]
D      comp58738_c1_seq3; <a href="/dbget-bin/www_bget?ko:K00517">K00517</a>  E1.14.-.-;  [EC:1.14.-.-]
C    00621 Dioxin degradation [PATH:<a href="http://www.kegg.jp/kegg-bin/show_pathway?@ko00621">ko00621</a>]
C    00626 Naphthalene degradation [PATH:<a href="http://www.kegg.jp/kegg-bin/show_pathway?@ko00626/K00001/K00121">ko00626</a>]
D      comp46391_c0_seq6; <a href="/dbget-bin/www_bget?ko:K00001">K00001</a>  E1.1.1.1, adh; alcohol dehydrogenase [EC:1.1.1.1]
D      comp47846_c0_seq1; <a href="/dbget-bin/www_bget?ko:K00001">K00001</a>  E1.1.1.1, adh; alcohol dehydrogenase [EC:1.1.1.1]
D      comp55735_c0_seq2; <a href="/dbget-bin/www_bget?ko:K00001">K00001</a>  E1.1.1.1, adh; alcohol dehydrogenase [EC:1.1.1.1]
D      comp56151_c0_seq6; <a href="/dbget-bin/www_bget?ko:K00001">K00001</a>  E1.1.1.1, adh; alcohol dehydrogenase [EC:1.1.1.1]
D      comp32193_c0_seq3; <a href="/dbget-bin/www_bget?ko:K00121">K00121</a>  frmA, ADH5, adhC; S-(hydroxymethyl)glutathione dehydrogenase / alcohol dehydrogenase [EC:1.1.1.284 1.1.1.1]
D      comp55546_c0_seq1; <a href="/dbget-bin/www_bget?ko:K00121">K00121</a>  frmA, ADH5, adhC; S-(hydroxymethyl)glutathione dehydrogenase / alcohol dehydrogenase [EC:1.1.1.284 1.1.1.1]
C    00624 Polycyclic aromatic hydrocarbon degradation [PATH:<a href="http://www.kegg.jp/kegg-bin/show_pathway?@ko00624/K00224/K00517/K00599">ko00624</a>]
D      comp46052_c0_seq1; <a href="/dbget-bin/www_bget?ko:K00224">K00224</a>  E1.3.1.-;  [EC:1.3.1.-]
D      comp36755_c0_seq1; <a href="/dbget-bin/www_bget?ko:K00517">K00517</a>  E1.14.-.-;  [EC:1.14.-.-]
[truncated: 613,926 more chars]
