# Supplementary material for: De Novo Assembly and Characterization of Sophora japonica Transcriptome Using RNA-seq
Source: Biomed Res Int. 2014 Jan 2;2014:750961. doi: 10.1155/2014/750961 (PMC3910276; doi:10.1155/2014/750961)
Supplement: Supplementary file 1 — Additional file1: Information of unigenes expression in S. japonica. Additional file2: DNA sequences of all unigenes in S. japonica. Additional file3: Potential protein coding sequences of all unigenes in S. japonica. Additional file4: Quality score distribution across all bases. Additional file5: Quality score distribution over all sequences. Additional file6: Distribution of unigenes mapped to the speciesshown by pie graph. Additional file7: Detailed information for GO classification of unigenes in S. japonica. Additional file8: COG functional classification list of unigenes in S. japonica. Additional file9: Detailed information for unignenes mapping KEGG pathway in S. japonica. Additional file10: Illustration of the whole network of unigenes in S. japonica. Additional file11: Protein-protein interactions of unigenes in S. japonica. [file 750961.f1.zip › 750961.f1/Additional file/Additional file11 6species_network.txt]

comp105604_c0_seq1 comp45811_c0_seq1
comp105604_c0_seq1 comp48997_c0_seq1
comp105604_c0_seq1 comp50943_c0_seq2
comp105903_c0_seq1 comp2227_c0_seq1
comp105903_c0_seq1 comp41769_c0_seq1
comp105903_c0_seq1 comp42984_c0_seq1
comp105903_c0_seq1 comp44256_c0_seq1
comp105903_c0_seq1 comp44379_c0_seq1
comp105903_c0_seq1 comp48732_c0_seq1
comp105903_c0_seq1 comp51526_c0_seq6
comp105903_c0_seq1 comp53916_c0_seq1
comp105903_c0_seq1 comp56282_c0_seq2
comp105903_c0_seq1 comp59994_c0_seq8
comp113233_c0_seq1 comp56096_c0_seq3
comp114049_c0_seq1 comp56827_c0_seq1
comp11483_c0_seq1 comp44114_c0_seq1
comp11483_c0_seq1 comp49601_c0_seq1
comp11483_c0_seq1 comp53960_c0_seq3
comp11483_c0_seq1 comp59680_c2_seq4
comp11483_c0_seq1 comp59715_c0_seq9
comp115057_c0_seq1 comp143229_c0_seq1
comp115057_c0_seq1 comp354_c0_seq1
comp115057_c0_seq1 comp49615_c0_seq2
comp115057_c0_seq1 comp54316_c0_seq5
comp115057_c0_seq1 comp58049_c1_seq1
comp115057_c0_seq1 comp59219_c1_seq1
comp115195_c0_seq1 comp56891_c1_seq1
comp11522_c0_seq1 comp354_c0_seq1
comp11522_c0_seq1 comp52068_c0_seq3
comp11522_c0_seq1 comp56526_c1_seq5
comp11522_c0_seq1 comp58271_c0_seq1
comp11522_c0_seq1 comp59219_c1_seq1
comp115548_c0_seq1 comp59994_c0_seq8
comp116937_c0_seq1 comp54228_c3_seq8
comp116937_c0_seq1 comp57864_c0_seq1
comp116937_c0_seq1 comp58794_c0_seq3
comp116937_c0_seq1 comp59328_c0_seq1
comp117707_c0_seq1 comp130811_c0_seq1
comp117707_c0_seq1 comp142595_c0_seq1
comp117707_c0_seq1 comp153725_c0_seq1
comp117707_c0_seq1 comp30911_c0_seq1
comp117707_c0_seq1 comp41342_c0_seq1
comp117707_c0_seq1 comp44200_c0_seq1
comp117707_c0_seq1 comp49609_c0_seq1
comp117707_c0_seq1 comp52031_c0_seq2
comp117707_c0_seq1 comp52501_c0_seq1
comp119203_c0_seq1 comp232464_c0_seq1
comp119203_c0_seq1 comp48780_c0_seq2
comp119203_c0_seq1 comp51281_c0_seq3
comp119203_c0_seq1 comp52140_c0_seq2
comp11954_c0_seq1 comp147129_c0_seq1
comp11954_c0_seq1 comp28282_c0_seq1
comp11954_c0_seq1 comp38070_c0_seq1
comp11954_c0_seq1 comp40576_c1_seq1
comp11954_c0_seq1 comp42040_c0_seq1
comp11954_c0_seq1 comp46934_c0_seq1
comp11954_c0_seq1 comp50305_c0_seq1
comp11954_c0_seq1 comp50574_c0_seq1
comp11954_c0_seq1 comp51342_c0_seq1
comp11954_c0_seq1 comp53514_c0_seq2
comp11954_c0_seq1 comp55882_c1_seq3
comp11954_c0_seq1 comp59489_c1_seq1
comp11954_c0_seq1 comp60842_c0_seq1
comp12019_c0_seq1 comp130811_c0_seq1
comp12019_c0_seq1 comp30911_c0_seq1
comp12019_c0_seq1 comp45811_c0_seq1
comp12019_c0_seq1 comp48997_c0_seq1
comp12019_c0_seq1 comp49609_c0_seq1
comp12019_c0_seq1 comp50943_c0_seq2
comp120953_c0_seq1 comp161684_c0_seq1
comp120953_c0_seq1 comp26328_c0_seq1
comp120953_c0_seq1 comp28401_c0_seq1
comp120953_c0_seq1 comp30079_c0_seq1
comp120953_c0_seq1 comp45811_c0_seq1
comp120953_c0_seq1 comp48997_c0_seq1
comp120953_c0_seq1 comp49548_c0_seq3
comp120953_c0_seq1 comp50943_c0_seq2
comp120953_c0_seq1 comp59027_c3_seq2
comp125125_c0_seq1 comp130811_c0_seq1
comp125125_c0_seq1 comp30911_c0_seq1
comp125125_c0_seq1 comp45811_c0_seq1
comp125125_c0_seq1 comp48997_c0_seq1
comp125125_c0_seq1 comp49609_c0_seq1
comp125125_c0_seq1 comp50943_c0_seq2
comp128456_c0_seq1 comp53960_c0_seq3
comp128456_c0_seq1 comp59140_c0_seq2
comp128456_c0_seq1 comp59680_c2_seq4
comp128456_c0_seq1 comp59715_c0_seq9
comp1287_c0_seq1 comp27878_c0_seq1
comp130811_c0_seq1 comp14153_c0_seq1
comp130811_c0_seq1 comp142416_c0_seq1
comp130811_c0_seq1 comp147107_c0_seq1
comp130811_c0_seq1 comp151798_c0_seq1
comp130811_c0_seq1 comp153725_c0_seq1
comp130811_c0_seq1 comp165805_c0_seq1
comp130811_c0_seq1 comp170326_c0_seq1
comp130811_c0_seq1 comp26835_c0_seq1
comp130811_c0_seq1 comp27037_c0_seq1
comp130811_c0_seq1 comp27878_c0_seq1
comp130811_c0_seq1 comp286234_c0_seq1
comp130811_c0_seq1 comp29392_c0_seq1
comp130811_c0_seq1 comp30109_c0_seq1
comp130811_c0_seq1 comp3350_c0_seq1
comp130811_c0_seq1 comp34188_c0_seq1
comp130811_c0_seq1 comp34682_c0_seq1
comp130811_c0_seq1 comp39139_c0_seq1
comp130811_c0_seq1 comp40644_c0_seq1
comp130811_c0_seq1 comp40752_c1_seq1
comp130811_c0_seq1 comp40810_c0_seq1
comp130811_c0_seq1 comp43821_c0_seq1
comp130811_c0_seq1 comp45811_c0_seq1
comp130811_c0_seq1 comp46083_c0_seq2
comp130811_c0_seq1 comp46444_c0_seq1
comp130811_c0_seq1 comp48171_c0_seq1
comp130811_c0_seq1 comp48268_c0_seq2
comp130811_c0_seq1 comp48997_c0_seq1
comp130811_c0_seq1 comp50421_c0_seq1
comp130811_c0_seq1 comp50624_c0_seq2
comp130811_c0_seq1 comp50943_c0_seq2
comp130811_c0_seq1 comp51444_c0_seq1
comp130811_c0_seq1 comp52031_c0_seq2
comp130811_c0_seq1 comp53376_c0_seq1
comp130811_c0_seq1 comp53988_c0_seq2
comp130811_c0_seq1 comp54302_c0_seq2
comp130811_c0_seq1 comp54868_c0_seq2
comp130811_c0_seq1 comp55379_c1_seq2
comp130811_c0_seq1 comp56083_c0_seq2
comp130811_c0_seq1 comp56346_c0_seq2
comp130811_c0_seq1 comp56385_c0_seq2
comp130811_c0_seq1 comp68783_c0_seq1
comp130811_c0_seq1 comp73695_c0_seq1
comp1334_c0_seq1 comp44574_c0_seq1
comp1334_c0_seq1 comp44577_c0_seq1
comp1334_c0_seq1 comp50178_c0_seq1
comp1334_c0_seq1 comp54035_c0_seq3
comp1334_c0_seq1 comp57123_c0_seq5
comp1334_c0_seq1 comp57909_c0_seq3
comp136213_c0_seq1 comp27878_c0_seq1
comp136573_c0_seq1 comp56632_c0_seq1
comp14153_c0_seq1 comp26548_c0_seq1
comp14153_c0_seq1 comp30911_c0_seq1
comp14153_c0_seq1 comp3564_c0_seq1
comp14153_c0_seq1 comp45811_c0_seq1
comp14153_c0_seq1 comp48997_c0_seq1
comp14153_c0_seq1 comp49609_c0_seq1
comp14153_c0_seq1 comp50421_c0_seq1
comp14153_c0_seq1 comp50943_c0_seq2
comp14153_c0_seq1 comp53988_c0_seq2
comp14153_c0_seq1 comp57017_c0_seq2
comp141637_c0_seq1 comp44577_c0_seq1
comp141637_c0_seq1 comp50178_c0_seq1
comp141637_c0_seq1 comp55030_c0_seq1
comp141637_c0_seq1 comp55263_c1_seq2
comp141637_c0_seq1 comp57552_c0_seq4
comp141637_c0_seq1 comp57909_c0_seq3
comp142416_c0_seq1 comp161684_c0_seq1
comp142416_c0_seq1 comp26328_c0_seq1
comp142416_c0_seq1 comp26548_c0_seq1
comp142416_c0_seq1 comp28401_c0_seq1
comp142416_c0_seq1 comp30079_c0_seq1
comp142416_c0_seq1 comp30911_c0_seq1
comp142416_c0_seq1 comp3564_c0_seq1
comp142416_c0_seq1 comp45811_c0_seq1
comp142416_c0_seq1 comp48997_c0_seq1
comp142416_c0_seq1 comp49548_c0_seq3
comp142416_c0_seq1 comp49609_c0_seq1
comp142416_c0_seq1 comp50943_c0_seq2
comp142416_c0_seq1 comp57017_c0_seq2
comp142416_c0_seq1 comp59027_c3_seq2
comp142595_c0_seq1 comp153725_c0_seq1
comp142595_c0_seq1 comp30109_c0_seq1
comp142595_c0_seq1 comp3350_c0_seq1
comp142595_c0_seq1 comp47257_c0_seq1
comp142595_c0_seq1 comp48268_c0_seq2
comp142595_c0_seq1 comp51444_c0_seq1
comp142595_c0_seq1 comp52031_c0_seq2
comp142595_c0_seq1 comp59489_c1_seq1
comp143229_c0_seq1 comp354_c0_seq1
comp143229_c0_seq1 comp49615_c0_seq2
comp143229_c0_seq1 comp54483_c0_seq2
comp143229_c0_seq1 comp58049_c1_seq1
comp143229_c0_seq1 comp59219_c1_seq1
comp147107_c0_seq1 comp26548_c0_seq1
comp147107_c0_seq1 comp30911_c0_seq1
comp147107_c0_seq1 comp3564_c0_seq1
comp147107_c0_seq1 comp43851_c0_seq1
comp147107_c0_seq1 comp45811_c0_seq1
comp147107_c0_seq1 comp48997_c0_seq1
comp147107_c0_seq1 comp49609_c0_seq1
comp147107_c0_seq1 comp50943_c0_seq2
comp147107_c0_seq1 comp57017_c0_seq2
comp147129_c0_seq1 comp28282_c0_seq1
comp147129_c0_seq1 comp38070_c0_seq1
comp147129_c0_seq1 comp40576_c1_seq1
comp147129_c0_seq1 comp42040_c0_seq1
comp147129_c0_seq1 comp45191_c0_seq2
comp147129_c0_seq1 comp46934_c0_seq1
comp147129_c0_seq1 comp47257_c0_seq1
comp147129_c0_seq1 comp50305_c0_seq1
comp147129_c0_seq1 comp50574_c0_seq1
comp147129_c0_seq1 comp51342_c0_seq1
comp147129_c0_seq1 comp52956_c0_seq3
comp147129_c0_seq1 comp54270_c0_seq2
comp147129_c0_seq1 comp55882_c1_seq3
comp147129_c0_seq1 comp57189_c0_seq1
comp147129_c0_seq1 comp58299_c0_seq2
comp147129_c0_seq1 comp59489_c1_seq1
comp147129_c0_seq1 comp60842_c0_seq1
comp14887_c0_seq1 comp42706_c0_seq1
comp14887_c0_seq1 comp44577_c0_seq1
comp14887_c0_seq1 comp50178_c0_seq1
comp14887_c0_seq1 comp55030_c0_seq1
comp14887_c0_seq1 comp55263_c1_seq2
comp14887_c0_seq1 comp56523_c0_seq29
comp14887_c0_seq1 comp57552_c0_seq4
comp14887_c0_seq1 comp57615_c0_seq3
comp14887_c0_seq1 comp57909_c0_seq3
comp151012_c0_seq1 comp161684_c0_seq1
comp151012_c0_seq1 comp30079_c0_seq1
comp151012_c0_seq1 comp59027_c3_seq2
comp151072_c0_seq1 comp182306_c0_seq1
comp151072_c0_seq1 comp58393_c0_seq7
comp151072_c0_seq1 comp59300_c0_seq20
comp151072_c0_seq1 comp60533_c0_seq1
comp151798_c0_seq1 comp30911_c0_seq1
comp151798_c0_seq1 comp49609_c0_seq1
comp152714_c0_seq1 comp53958_c0_seq2
comp152714_c0_seq1 comp57972_c0_seq1
comp153725_c0_seq1 comp30109_c0_seq1
comp153725_c0_seq1 comp30911_c0_seq1
comp153725_c0_seq1 comp3350_c0_seq1
comp153725_c0_seq1 comp41342_c0_seq1
comp153725_c0_seq1 comp44200_c0_seq1
comp153725_c0_seq1 comp47257_c0_seq1
comp153725_c0_seq1 comp48268_c0_seq2
comp153725_c0_seq1 comp49609_c0_seq1
comp153725_c0_seq1 comp51444_c0_seq1
comp153725_c0_seq1 comp52501_c0_seq1
comp153725_c0_seq1 comp53754_c0_seq2
comp153725_c0_seq1 comp57189_c0_seq1
comp153725_c0_seq1 comp59489_c1_seq1
comp154631_c0_seq1 comp367522_c0_seq1
comp154631_c0_seq1 comp43820_c0_seq1
comp155100_c0_seq1 comp44226_c0_seq1
comp156632_c0_seq1 comp204058_c0_seq1
comp156632_c0_seq1 comp33785_c0_seq1
comp156632_c0_seq1 comp48879_c0_seq1
comp156632_c0_seq1 comp56456_c0_seq1
comp158001_c0_seq1 comp52341_c0_seq1
comp158001_c0_seq1 comp53759_c0_seq1
comp158001_c0_seq1 comp56180_c0_seq1
comp161684_c0_seq1 comp162488_c0_seq1
comp161684_c0_seq1 comp167747_c0_seq1
comp161684_c0_seq1 comp168710_c0_seq1
comp161684_c0_seq1 comp204058_c0_seq1
comp161684_c0_seq1 comp215015_c0_seq1
comp161684_c0_seq1 comp26328_c0_seq1
comp161684_c0_seq1 comp26685_c0_seq1
comp161684_c0_seq1 comp27037_c0_seq1
comp161684_c0_seq1 comp28401_c0_seq1
comp161684_c0_seq1 comp28726_c0_seq1
comp161684_c0_seq1 comp30921_c0_seq1
comp161684_c0_seq1 comp31302_c0_seq1
comp161684_c0_seq1 comp32664_c0_seq1
comp161684_c0_seq1 comp32966_c0_seq1
comp161684_c0_seq1 comp33785_c0_seq1
comp161684_c0_seq1 comp34212_c0_seq1
comp161684_c0_seq1 comp36354_c0_seq1
comp161684_c0_seq1 comp37254_c0_seq1
comp161684_c0_seq1 comp40810_c0_seq1
comp161684_c0_seq1 comp43474_c0_seq1
comp161684_c0_seq1 comp44558_c1_seq3
comp161684_c0_seq1 comp45392_c0_seq1
comp161684_c0_seq1 comp45575_c0_seq1
comp161684_c0_seq1 comp45811_c0_seq1
comp161684_c0_seq1 comp46415_c0_seq1
comp161684_c0_seq1 comp47031_c0_seq1
comp161684_c0_seq1 comp47137_c1_seq1
comp161684_c0_seq1 comp48557_c0_seq1
comp161684_c0_seq1 comp48725_c0_seq2
comp161684_c0_seq1 comp48879_c0_seq1
comp161684_c0_seq1 comp48997_c0_seq1
comp161684_c0_seq1 comp49548_c0_seq3
comp161684_c0_seq1 comp50943_c0_seq2
comp161684_c0_seq1 comp51526_c0_seq6
comp161684_c0_seq1 comp52258_c0_seq2
comp161684_c0_seq1 comp52518_c0_seq2
comp161684_c0_seq1 comp53237_c0_seq2
comp161684_c0_seq1 comp53452_c0_seq2
comp161684_c0_seq1 comp53900_c0_seq1
comp161684_c0_seq1 comp54559_c0_seq2
comp161684_c0_seq1 comp54736_c1_seq2
comp161684_c0_seq1 comp54868_c0_seq2
comp161684_c0_seq1 comp56084_c0_seq2
comp161684_c0_seq1 comp56187_c0_seq4
comp161684_c0_seq1 comp56293_c1_seq1
comp161684_c0_seq1 comp56385_c0_seq2
comp161684_c0_seq1 comp56456_c0_seq1
comp161684_c0_seq1 comp56621_c0_seq4
comp161684_c0_seq1 comp57847_c0_seq5
comp161684_c0_seq1 comp72426_c0_seq1
comp162488_c0_seq1 comp30079_c0_seq1
comp162488_c0_seq1 comp52745_c0_seq1
comp162488_c0_seq1 comp54580_c0_seq2
comp162488_c0_seq1 comp56762_c3_seq1
comp162488_c0_seq1 comp57612_c0_seq2
comp162488_c0_seq1 comp58396_c0_seq2
comp162488_c0_seq1 comp59027_c3_seq2
comp162488_c0_seq1 comp59120_c0_seq2
comp162488_c0_seq1 comp60080_c1_seq1
comp163899_c0_seq1 comp58038_c3_seq3
comp164484_c0_seq1 comp51043_c0_seq2
comp164484_c0_seq1 comp55850_c0_seq2
comp16532_c0_seq1 comp27392_c0_seq1
comp16532_c0_seq1 comp37155_c1_seq1
comp16532_c0_seq1 comp37817_c0_seq1
comp16532_c0_seq1 comp42055_c0_seq1
comp16532_c0_seq1 comp44071_c0_seq1
comp16532_c0_seq1 comp44244_c0_seq1
comp16532_c0_seq1 comp44252_c0_seq1
comp16532_c0_seq1 comp46934_c0_seq1
comp16532_c0_seq1 comp48433_c0_seq1
comp16532_c0_seq1 comp49274_c0_seq1
comp16532_c0_seq1 comp49735_c0_seq1
comp16532_c0_seq1 comp50155_c0_seq3
comp16532_c0_seq1 comp50574_c0_seq1
comp16532_c0_seq1 comp52368_c0_seq11
comp16532_c0_seq1 comp52795_c0_seq2
comp16532_c0_seq1 comp53051_c0_seq5
comp16532_c0_seq1 comp53526_c1_seq3
comp16532_c0_seq1 comp55536_c0_seq1
comp16532_c0_seq1 comp58724_c0_seq2
comp16532_c0_seq1 comp60981_c0_seq1
comp165330_c0_seq1 comp54119_c0_seq1
comp165330_c0_seq1 comp55347_c0_seq2
comp165330_c0_seq1 comp58694_c1_seq5
comp165805_c0_seq1 comp30911_c0_seq1
comp165805_c0_seq1 comp49609_c0_seq1
comp167747_c0_seq1 comp26328_c0_seq1
comp167747_c0_seq1 comp28401_c0_seq1
comp167747_c0_seq1 comp30079_c0_seq1
comp167747_c0_seq1 comp45811_c0_seq1
comp167747_c0_seq1 comp48997_c0_seq1
comp167747_c0_seq1 comp49548_c0_seq3
comp167747_c0_seq1 comp50943_c0_seq2
comp167747_c0_seq1 comp54580_c0_seq2
comp167747_c0_seq1 comp59027_c3_seq2
comp168710_c0_seq1 comp30079_c0_seq1
comp168710_c0_seq1 comp59027_c3_seq2
comp170326_c0_seq1 comp30911_c0_seq1
comp170326_c0_seq1 comp47257_c0_seq1
comp170326_c0_seq1 comp49609_c0_seq1
comp170326_c0_seq1 comp57189_c0_seq1
comp170326_c0_seq1 comp59489_c1_seq1
comp17559_c0_seq1 comp2562_c0_seq1
comp17559_c0_seq1 comp42950_c0_seq1
comp17559_c0_seq1 comp50777_c0_seq1
comp17559_c0_seq1 comp58012_c0_seq19
comp180945_c0_seq1 comp27878_c0_seq1
comp180945_c0_seq1 comp31162_c0_seq1
comp180945_c0_seq1 comp54580_c0_seq2
comp181519_c0_seq1 comp55206_c1_seq1
comp181986_c0_seq1 comp26548_c0_seq1
comp181986_c0_seq1 comp3564_c0_seq1
comp181986_c0_seq1 comp57017_c0_seq2
comp182306_c0_seq1 comp200836_c0_seq1
comp182306_c0_seq1 comp204356_c0_seq1
comp182306_c0_seq1 comp27548_c0_seq1
comp182306_c0_seq1 comp44153_c0_seq3
comp182306_c0_seq1 comp47982_c0_seq3
comp182306_c0_seq1 comp48331_c0_seq1
comp182306_c0_seq1 comp49179_c0_seq1
comp182306_c0_seq1 comp51206_c1_seq6
comp182306_c0_seq1 comp52124_c0_seq1
comp182306_c0_seq1 comp52562_c0_seq2
comp182306_c0_seq1 comp55206_c1_seq1
comp182306_c0_seq1 comp55666_c2_seq1
comp182306_c0_seq1 comp56732_c0_seq2
comp182306_c0_seq1 comp57803_c2_seq1
comp182306_c0_seq1 comp59138_c0_seq2
comp182306_c0_seq1 comp60161_c0_seq1
comp1876_c0_seq1 comp354_c0_seq1
comp1876_c0_seq1 comp39407_c0_seq1
comp1876_c0_seq1 comp40739_c0_seq1
comp1876_c0_seq1 comp42213_c0_seq1
comp1876_c0_seq1 comp46904_c2_seq1
comp1876_c0_seq1 comp52619_c0_seq1
comp1876_c0_seq1 comp53058_c0_seq1
comp1876_c0_seq1 comp53664_c0_seq2
comp1876_c0_seq1 comp56291_c0_seq4
comp1876_c0_seq1 comp56977_c3_seq1
comp1876_c0_seq1 comp57518_c0_seq1
comp1876_c0_seq1 comp57864_c0_seq1
comp1876_c0_seq1 comp58957_c0_seq7
comp1876_c0_seq1 comp59219_c1_seq1
comp1876_c0_seq1 comp59448_c2_seq1
comp1876_c0_seq1 comp59542_c3_seq2
comp1900_c0_seq1 comp27345_c0_seq1
comp1900_c0_seq1 comp43019_c0_seq2
comp1900_c0_seq1 comp46493_c0_seq1
comp1900_c0_seq1 comp47199_c0_seq1
comp1900_c0_seq1 comp47798_c0_seq1
comp1900_c0_seq1 comp47940_c0_seq1
comp1900_c0_seq1 comp49475_c1_seq1
comp1900_c0_seq1 comp50437_c0_seq1
comp1900_c0_seq1 comp55945_c0_seq2
comp1900_c0_seq1 comp56809_c0_seq1
comp1900_c0_seq1 comp58151_c1_seq2
comp1900_c0_seq1 comp58427_c0_seq2
comp1900_c0_seq1 comp59022_c2_seq20
comp1900_c0_seq1 comp59555_c2_seq4
comp1900_c0_seq1 comp59636_c0_seq3
comp1900_c0_seq1 comp59649_c0_seq28
comp190175_c0_seq1 comp57783_c0_seq1
comp19309_c0_seq1 comp44260_c0_seq1
comp19309_c0_seq1 comp49761_c0_seq1
comp19309_c0_seq1 comp50180_c0_seq1
comp19309_c0_seq1 comp51526_c0_seq6
comp19309_c0_seq1 comp54679_c0_seq1
comp19309_c0_seq1 comp55138_c0_seq1
comp19309_c0_seq1 comp57893_c0_seq7
comp19309_c0_seq1 comp59309_c1_seq3
comp199644_c0_seq1 comp40739_c0_seq1
comp199644_c0_seq1 comp40952_c0_seq1
comp199644_c0_seq1 comp42811_c0_seq2
comp199644_c0_seq1 comp43846_c0_seq2
comp199644_c0_seq1 comp52437_c0_seq1
comp199644_c0_seq1 comp54809_c0_seq1
comp199644_c0_seq1 comp55654_c1_seq27
comp199644_c0_seq1 comp57248_c0_seq1
comp199644_c0_seq1 comp57483_c0_seq5
comp199644_c0_seq1 comp57936_c0_seq1
comp199644_c0_seq1 comp58073_c0_seq1
comp199644_c0_seq1 comp58844_c0_seq16
comp199644_c0_seq1 comp59038_c0_seq3
comp199644_c0_seq1 comp59370_c0_seq1
comp199644_c0_seq1 comp59742_c1_seq3
comp199644_c0_seq1 comp59973_c0_seq6
comp20070_c0_seq1 comp49846_c0_seq2
comp20070_c0_seq1 comp54912_c0_seq1
comp20070_c0_seq1 comp58244_c0_seq2
comp20070_c0_seq1 comp59658_c2_seq3
comp200836_c0_seq1 comp58393_c0_seq7
comp200836_c0_seq1 comp59300_c0_seq20
comp200836_c0_seq1 comp60533_c0_seq1
comp200951_c0_seq1 comp50486_c0_seq1
comp201349_c0_seq1 comp237280_c0_seq1
comp201349_c0_seq1 comp43710_c0_seq2
comp201349_c0_seq1 comp59138_c0_seq2
comp20177_c0_seq1 comp55928_c0_seq2
comp20365_c0_seq1 comp44577_c0_seq1
comp20365_c0_seq1 comp47140_c0_seq1
comp20365_c0_seq1 comp50178_c0_seq1
comp20365_c0_seq1 comp50548_c0_seq1
comp20365_c0_seq1 comp51313_c0_seq1
comp20365_c0_seq1 comp52068_c0_seq3
comp20365_c0_seq1 comp52075_c0_seq1
comp20365_c0_seq1 comp55030_c0_seq1
comp20365_c0_seq1 comp55263_c1_seq2
comp20365_c0_seq1 comp56526_c1_seq5
comp20365_c0_seq1 comp57552_c0_seq4
comp20365_c0_seq1 comp57909_c0_seq3
comp20365_c0_seq1 comp58794_c0_seq3
comp20365_c0_seq1 comp58859_c0_seq17
comp20365_c0_seq1 comp59227_c0_seq2
comp20365_c0_seq1 comp59328_c0_seq1
comp20365_c0_seq1 comp59650_c1_seq1
comp204058_c0_seq1 comp30079_c0_seq1
comp204058_c0_seq1 comp47295_c0_seq4
comp204058_c0_seq1 comp51867_c0_seq1
comp204058_c0_seq1 comp59027_c3_seq2
comp204058_c0_seq1 comp86063_c0_seq1
comp204356_c0_seq1 comp43992_c0_seq1
comp204356_c0_seq1 comp48331_c0_seq1
comp204356_c0_seq1 comp49373_c0_seq1
comp204356_c0_seq1 comp52124_c0_seq1
comp204356_c0_seq1 comp52562_c0_seq2
comp204356_c0_seq1 comp58393_c0_seq7
comp204356_c0_seq1 comp59300_c0_seq20
comp204356_c0_seq1 comp60161_c0_seq1
comp204356_c0_seq1 comp60533_c0_seq1
comp204356_c0_seq1 comp60537_c0_seq1
comp204392_c0_seq1 comp48752_c0_seq3
comp204392_c0_seq1 comp56541_c0_seq1
comp20605_c0_seq2 comp40952_c0_seq1
comp20605_c0_seq2 comp42811_c0_seq2
comp20605_c0_seq2 comp43846_c0_seq2
comp20605_c0_seq2 comp52437_c0_seq1
comp20605_c0_seq2 comp54809_c0_seq1
comp20605_c0_seq2 comp55654_c1_seq27
comp20605_c0_seq2 comp57248_c0_seq1
comp20605_c0_seq2 comp57483_c0_seq5
comp20605_c0_seq2 comp57936_c0_seq1
comp20605_c0_seq2 comp58073_c0_seq1
comp20605_c0_seq2 comp58844_c0_seq16
comp20605_c0_seq2 comp59038_c0_seq3
comp20605_c0_seq2 comp59370_c0_seq1
comp20605_c0_seq2 comp59742_c1_seq3
comp20605_c0_seq2 comp59973_c0_seq6
comp208620_c0_seq1 comp51526_c0_seq6
comp215015_c0_seq1 comp30079_c0_seq1
comp215015_c0_seq1 comp54580_c0_seq2
comp215015_c0_seq1 comp59027_c3_seq2
comp217662_c0_seq1 comp232464_c0_seq1
comp217662_c0_seq1 comp51281_c0_seq3
comp217662_c0_seq1 comp52140_c0_seq2
comp2227_c0_seq1 comp54107_c0_seq2
comp22278_c0_seq1 comp354_c0_seq1
comp22278_c0_seq1 comp59219_c1_seq1
comp222954_c0_seq1 comp56390_c0_seq2
comp22614_c0_seq1 comp44810_c0_seq2
comp22614_c0_seq1 comp46135_c0_seq5
comp22614_c0_seq1 comp50305_c0_seq1
comp22614_c0_seq1 comp59000_c0_seq7
comp232464_c0_seq1 comp46974_c0_seq3
comp232496_c0_seq1 comp58844_c0_seq16
comp237280_c0_seq1 comp57426_c1_seq2
comp237280_c0_seq1 comp59395_c0_seq1
comp24208_c0_seq1 comp49647_c0_seq1
comp24208_c0_seq1 comp51206_c1_seq6
comp24208_c0_seq1 comp51369_c0_seq1
comp24208_c0_seq1 comp54651_c0_seq6
comp24208_c0_seq1 comp57477_c0_seq1
comp24208_c0_seq1 comp57737_c1_seq1
comp24208_c0_seq1 comp58334_c0_seq1
comp24664_c0_seq1 comp43474_c0_seq1
comp24664_c0_seq1 comp44574_c0_seq1
comp24664_c0_seq1 comp44577_c0_seq1
comp24664_c0_seq1 comp45711_c0_seq1
comp24664_c0_seq1 comp46415_c0_seq1
comp24664_c0_seq1 comp48557_c0_seq1
comp24664_c0_seq1 comp49846_c0_seq2
comp24664_c0_seq1 comp50178_c0_seq1
comp24664_c0_seq1 comp51582_c0_seq1
comp24664_c0_seq1 comp52258_c0_seq2
comp24664_c0_seq1 comp52700_c1_seq3
comp24664_c0_seq1 comp53237_c0_seq2
comp24664_c0_seq1 comp53335_c0_seq5
comp24664_c0_seq1 comp53870_c0_seq5
comp24664_c0_seq1 comp54035_c0_seq3
comp24664_c0_seq1 comp54559_c0_seq2
comp24664_c0_seq1 comp55030_c0_seq1
comp24664_c0_seq1 comp55263_c1_seq2
comp24664_c0_seq1 comp55318_c0_seq2
comp24664_c0_seq1 comp56084_c0_seq2
comp24664_c0_seq1 comp57226_c1_seq1
comp24664_c0_seq1 comp57552_c0_seq4
comp24664_c0_seq1 comp57909_c0_seq3
comp24664_c0_seq1 comp57972_c0_seq1
comp24664_c0_seq1 comp58387_c2_seq2
comp24664_c0_seq1 comp59572_c0_seq3
comp2562_c0_seq1 comp56136_c0_seq2
comp2562_c0_seq1 comp56177_c0_seq3
comp2562_c0_seq1 comp56915_c0_seq10
comp2562_c0_seq1 comp58973_c6_seq12
comp26048_c0_seq1 comp29620_c0_seq1
comp26328_c0_seq1 comp27037_c0_seq1
comp26328_c0_seq1 comp30079_c0_seq1
comp26328_c0_seq1 comp31302_c0_seq1
comp26328_c0_seq1 comp37254_c0_seq1
comp26328_c0_seq1 comp40810_c0_seq1
comp26328_c0_seq1 comp45811_c0_seq1
comp26328_c0_seq1 comp48997_c0_seq1
comp26328_c0_seq1 comp50943_c0_seq2
comp26328_c0_seq1 comp54580_c0_seq2
comp26328_c0_seq1 comp54736_c1_seq2
comp26328_c0_seq1 comp54868_c0_seq2
comp26328_c0_seq1 comp56187_c0_seq4
comp26328_c0_seq1 comp56385_c0_seq2
comp26328_c0_seq1 comp59027_c3_seq2
comp2650_c0_seq1 comp54580_c0_seq2
comp26548_c0_seq1 comp27037_c0_seq1
comp26548_c0_seq1 comp32664_c0_seq1
comp26548_c0_seq1 comp34188_c0_seq1
comp26548_c0_seq1 comp34682_c0_seq1
comp26548_c0_seq1 comp36672_c0_seq1
comp26548_c0_seq1 comp40644_c0_seq1
comp26548_c0_seq1 comp40810_c0_seq1
comp26548_c0_seq1 comp43474_c0_seq1
comp26548_c0_seq1 comp46415_c0_seq1
comp26548_c0_seq1 comp48557_c0_seq1
comp26548_c0_seq1 comp49280_c0_seq6
comp26548_c0_seq1 comp50421_c0_seq1
comp26548_c0_seq1 comp52258_c0_seq2
comp26548_c0_seq1 comp53237_c0_seq2
comp26548_c0_seq1 comp53452_c0_seq2
comp26548_c0_seq1 comp54559_c0_seq2
comp26548_c0_seq1 comp54868_c0_seq2
comp26548_c0_seq1 comp55138_c0_seq1
comp26548_c0_seq1 comp55379_c1_seq2
comp26548_c0_seq1 comp56083_c0_seq2
comp26548_c0_seq1 comp56084_c0_seq2
comp26548_c0_seq1 comp56385_c0_seq2
comp26548_c0_seq1 comp58157_c0_seq2
comp26548_c0_seq1 comp6889_c0_seq1
comp26585_c0_seq1 comp44054_c0_seq1
comp26620_c0_seq1 comp45811_c0_seq1
comp26620_c0_seq1 comp48997_c0_seq1
comp26620_c0_seq1 comp50943_c0_seq2
comp26685_c0_seq1 comp276112_c0_seq1
comp26685_c0_seq1 comp30079_c0_seq1
comp26685_c0_seq1 comp33736_c0_seq1
comp26685_c0_seq1 comp43377_c0_seq1
comp26685_c0_seq1 comp44235_c0_seq1
comp26685_c0_seq1 comp45811_c0_seq1
comp26685_c0_seq1 comp48997_c0_seq1
comp26685_c0_seq1 comp50943_c0_seq2
comp26685_c0_seq1 comp5604_c0_seq1
comp26685_c0_seq1 comp59027_c3_seq2
comp26699_c0_seq1 comp47862_c0_seq4
comp26699_c0_seq1 comp51898_c0_seq2
comp26699_c0_seq1 comp53407_c0_seq12
comp26699_c0_seq1 comp54644_c0_seq1
comp26699_c0_seq1 comp55868_c0_seq3
comp26699_c0_seq1 comp58002_c0_seq1
comp26705_c0_seq1 comp45811_c0_seq1
comp26705_c0_seq1 comp48997_c0_seq1
comp26705_c0_seq1 comp50943_c0_seq2
comp26835_c0_seq1 comp30911_c0_seq1
comp26835_c0_seq1 comp49609_c0_seq1
comp27037_c0_seq1 comp28401_c0_seq1
comp27037_c0_seq1 comp30079_c0_seq1
comp27037_c0_seq1 comp30911_c0_seq1
comp27037_c0_seq1 comp3564_c0_seq1
comp27037_c0_seq1 comp45811_c0_seq1
comp27037_c0_seq1 comp48997_c0_seq1
comp27037_c0_seq1 comp49548_c0_seq3
comp27037_c0_seq1 comp49609_c0_seq1
comp27037_c0_seq1 comp50943_c0_seq2
comp27037_c0_seq1 comp57017_c0_seq2
comp27037_c0_seq1 comp59027_c3_seq2
comp2718_c0_seq1 comp52124_c0_seq1
comp2718_c0_seq1 comp59395_c0_seq1
comp27251_c0_seq1 comp29307_c0_seq1
comp27251_c0_seq1 comp52745_c0_seq1
comp27251_c0_seq1 comp56762_c3_seq1
comp27251_c0_seq1 comp57612_c0_seq2
comp27251_c0_seq1 comp58396_c0_seq2
comp27251_c0_seq1 comp59120_c0_seq2
comp27251_c0_seq1 comp59562_c0_seq32
comp27251_c0_seq1 comp60080_c1_seq1
comp27288_c0_seq1 comp27878_c0_seq1
comp27288_c0_seq1 comp30874_c0_seq1
comp27288_c0_seq1 comp41860_c0_seq1
comp27288_c0_seq1 comp42605_c0_seq1
comp27288_c0_seq1 comp42617_c0_seq2
comp27288_c0_seq1 comp42706_c0_seq1
comp27288_c0_seq1 comp43474_c0_seq1
comp27288_c0_seq1 comp43478_c1_seq1
comp27288_c0_seq1 comp43783_c0_seq1
comp27288_c0_seq1 comp44116_c0_seq1
comp27288_c0_seq1 comp46415_c0_seq1
comp27288_c0_seq1 comp46549_c0_seq1
comp27288_c0_seq1 comp46657_c0_seq1
comp27288_c0_seq1 comp48154_c0_seq1
comp27288_c0_seq1 comp48557_c0_seq1
comp27288_c0_seq1 comp48639_c0_seq1
comp27288_c0_seq1 comp48839_c0_seq1
comp27288_c0_seq1 comp49304_c0_seq2
comp27288_c0_seq1 comp49373_c0_seq1
comp27288_c0_seq1 comp49475_c1_seq1
comp27288_c0_seq1 comp50397_c0_seq1
comp27288_c0_seq1 comp50456_c0_seq1
comp27288_c0_seq1 comp50598_c0_seq1
comp27288_c0_seq1 comp51469_c0_seq4
comp27288_c0_seq1 comp51513_c0_seq2
comp27288_c0_seq1 comp51827_c0_seq1
comp27288_c0_seq1 comp52067_c0_seq1
comp27288_c0_seq1 comp52119_c0_seq1
comp27288_c0_seq1 comp52258_c0_seq2
comp27288_c0_seq1 comp52317_c0_seq1
comp27288_c0_seq1 comp52694_c0_seq6
comp27288_c0_seq1 comp53237_c0_seq2
comp27288_c0_seq1 comp53977_c0_seq1
comp27288_c0_seq1 comp54270_c0_seq2
comp27288_c0_seq1 comp54327_c0_seq1
comp27288_c0_seq1 comp54559_c0_seq2
comp27288_c0_seq1 comp54580_c0_seq2
comp27288_c0_seq1 comp54600_c0_seq8
comp27288_c0_seq1 comp55237_c0_seq1
comp27288_c0_seq1 comp56084_c0_seq2
comp27288_c0_seq1 comp56174_c0_seq2
comp27288_c0_seq1 comp56270_c0_seq1
comp27288_c0_seq1 comp56287_c1_seq2
comp27288_c0_seq1 comp56977_c2_seq2
comp27288_c0_seq1 comp57469_c0_seq1
comp27288_c0_seq1 comp57578_c0_seq1
comp27288_c0_seq1 comp57746_c0_seq1
comp27288_c0_seq1 comp57829_c0_seq1
comp27288_c0_seq1 comp57910_c0_seq11
comp27288_c0_seq1 comp58238_c1_seq4
comp27288_c0_seq1 comp58299_c0_seq2
comp27288_c0_seq1 comp58545_c0_seq1
comp27288_c0_seq1 comp58670_c1_seq1
comp27288_c0_seq1 comp59343_c0_seq8
comp27288_c0_seq1 comp60136_c1_seq2
comp27288_c0_seq1 comp70289_c0_seq1
comp27288_c0_seq1 comp79792_c0_seq1
comp27288_c0_seq1 comp96284_c0_seq1
comp27323_c0_seq2 comp51313_c0_seq1
comp27323_c0_seq2 comp55825_c0_seq3
comp27323_c0_seq2 comp56012_c0_seq4
comp27323_c0_seq2 comp59227_c0_seq2
comp27392_c0_seq1 comp42055_c0_seq1
comp27392_c0_seq1 comp48160_c0_seq1
comp27392_c0_seq1 comp50948_c0_seq1
comp27392_c0_seq1 comp56008_c4_seq1
comp27398_c0_seq1 comp41727_c0_seq1
comp27398_c0_seq1 comp57517_c0_seq4
comp27432_c0_seq1 comp44260_c0_seq1
comp27432_c0_seq1 comp49761_c0_seq1
comp27432_c0_seq1 comp50180_c0_seq1
comp27432_c0_seq1 comp51526_c0_seq6
comp27432_c0_seq1 comp54679_c0_seq1
comp27432_c0_seq1 comp55138_c0_seq1
comp27432_c0_seq1 comp57893_c0_seq7
comp27432_c0_seq1 comp59309_c1_seq3
comp27440_c0_seq1 comp27590_c0_seq1
comp27440_c0_seq1 comp57631_c1_seq4
comp27452_c0_seq1 comp59706_c0_seq2
comp27470_c0_seq1 comp43019_c0_seq2
comp27470_c0_seq1 comp47798_c0_seq1
comp27470_c0_seq1 comp53058_c0_seq1
comp27470_c0_seq1 comp56809_c0_seq1
comp27470_c0_seq1 comp59339_c0_seq11
comp27477_c0_seq1 comp47475_c0_seq3
comp27477_c0_seq1 comp52588_c0_seq1
comp27477_c0_seq1 comp54003_c0_seq1
comp27477_c0_seq1 comp57664_c1_seq5
comp27477_c0_seq1 comp97705_c0_seq1
comp27485_c0_seq1 comp55347_c0_seq2
comp27543_c0_seq1 comp43137_c0_seq1
comp27543_c0_seq1 comp44255_c0_seq1
comp27543_c0_seq1 comp49151_c0_seq1
comp27543_c0_seq1 comp50094_c0_seq1
comp27548_c0_seq1 comp43992_c0_seq1
comp27548_c0_seq1 comp48331_c0_seq1
comp27548_c0_seq1 comp49373_c0_seq1
comp27548_c0_seq1 comp52124_c0_seq1
comp27548_c0_seq1 comp52562_c0_seq2
comp27548_c0_seq1 comp58393_c0_seq7
comp27548_c0_seq1 comp59300_c0_seq20
comp27548_c0_seq1 comp60161_c0_seq1
comp27548_c0_seq1 comp60533_c0_seq1
comp27548_c0_seq1 comp60537_c0_seq1
comp27590_c0_seq1 comp59800_c1_seq8
comp27591_c0_seq1 comp28194_c0_seq1
comp27591_c0_seq1 comp43153_c0_seq1
comp27591_c0_seq1 comp48597_c0_seq2
comp27591_c0_seq1 comp50730_c0_seq3
comp27591_c0_seq1 comp51600_c0_seq1
comp27591_c0_seq1 comp52958_c0_seq1
comp27591_c0_seq1 comp53342_c0_seq3
comp27591_c0_seq1 comp54717_c0_seq4
comp27591_c0_seq1 comp58465_c0_seq44
comp27600_c0_seq2 comp27878_c0_seq1
comp27600_c0_seq2 comp54580_c0_seq2
comp276037_c0_seq1 comp31659_c0_seq1
comp276037_c0_seq1 comp353500_c0_seq1
comp276037_c0_seq1 comp44225_c0_seq2
comp276037_c0_seq1 comp46711_c0_seq3
comp276037_c0_seq1 comp48216_c0_seq1
comp276037_c0_seq1 comp54211_c1_seq1
comp276037_c0_seq1 comp54644_c0_seq1
comp276037_c0_seq1 comp56070_c0_seq14
comp276037_c0_seq1 comp56129_c0_seq1
comp27609_c0_seq1 comp37817_c0_seq1
comp27609_c0_seq1 comp42055_c0_seq1
comp27609_c0_seq1 comp56008_c4_seq1
comp27609_c0_seq1 comp60695_c0_seq1
comp276112_c0_seq1 comp32966_c0_seq1
comp27612_c0_seq1 comp49298_c0_seq1
comp27612_c0_seq1 comp59016_c1_seq2
comp278066_c0_seq1 comp58900_c0_seq6
comp27878_c0_seq1 comp29876_c0_seq1
comp27878_c0_seq1 comp30874_c0_seq1
comp27878_c0_seq1 comp30911_c0_seq1
comp27878_c0_seq1 comp31162_c0_seq1
comp27878_c0_seq1 comp33937_c0_seq1
comp27878_c0_seq1 comp35210_c0_seq1
comp27878_c0_seq1 comp36726_c0_seq1
comp27878_c0_seq1 comp36747_c0_seq1
comp27878_c0_seq1 comp37268_c0_seq1
comp27878_c0_seq1 comp38266_c0_seq1
comp27878_c0_seq1 comp38339_c0_seq1
comp27878_c0_seq1 comp39986_c0_seq2
comp27878_c0_seq1 comp41654_c0_seq1
comp27878_c0_seq1 comp41860_c0_seq1
comp27878_c0_seq1 comp42605_c0_seq1
comp27878_c0_seq1 comp42623_c0_seq1
comp27878_c0_seq1 comp42706_c0_seq1
comp27878_c0_seq1 comp42872_c0_seq1
comp27878_c0_seq1 comp43675_c0_seq1
comp27878_c0_seq1 comp43799_c0_seq1
comp27878_c0_seq1 comp43831_c0_seq1
comp27878_c0_seq1 comp43944_c0_seq1
comp27878_c0_seq1 comp44165_c0_seq1
comp27878_c0_seq1 comp45817_c0_seq2
comp27878_c0_seq1 comp45952_c0_seq1
comp27878_c0_seq1 comp46253_c0_seq5
comp27878_c0_seq1 comp46296_c0_seq1
comp27878_c0_seq1 comp46549_c0_seq1
comp27878_c0_seq1 comp46657_c0_seq1
comp27878_c0_seq1 comp46802_c0_seq2
comp27878_c0_seq1 comp47284_c1_seq1
comp27878_c0_seq1 comp47475_c0_seq3
comp27878_c0_seq1 comp48021_c0_seq1
comp27878_c0_seq1 comp48058_c0_seq1
comp27878_c0_seq1 comp48168_c1_seq3
comp27878_c0_seq1 comp48639_c0_seq1
comp27878_c0_seq1 comp48839_c0_seq1
comp27878_c0_seq1 comp48877_c0_seq1
comp27878_c0_seq1 comp49015_c0_seq1
comp27878_c0_seq1 comp49053_c0_seq3
comp27878_c0_seq1 comp49304_c0_seq2
comp27878_c0_seq1 comp49324_c0_seq1
comp27878_c0_seq1 comp49428_c0_seq2
comp27878_c0_seq1 comp49497_c0_seq5
comp27878_c0_seq1 comp49603_c0_seq1
comp27878_c0_seq1 comp49609_c0_seq1
comp27878_c0_seq1 comp49797_c0_seq1
comp27878_c0_seq1 comp50155_c0_seq3
comp27878_c0_seq1 comp50165_c0_seq1
comp27878_c0_seq1 comp50598_c0_seq1
comp27878_c0_seq1 comp50761_c0_seq1
comp27878_c0_seq1 comp50938_c0_seq1
comp27878_c0_seq1 comp51368_c0_seq1
comp27878_c0_seq1 comp51389_c0_seq1
comp27878_c0_seq1 comp51463_c0_seq1
comp27878_c0_seq1 comp51740_c0_seq3
comp27878_c0_seq1 comp51827_c0_seq1
comp27878_c0_seq1 comp51966_c0_seq2
comp27878_c0_seq1 comp52068_c0_seq3
comp27878_c0_seq1 comp52237_c0_seq1
comp27878_c0_seq1 comp52317_c0_seq1
comp27878_c0_seq1 comp52380_c0_seq1
comp27878_c0_seq1 comp52554_c0_seq2
comp27878_c0_seq1 comp52588_c0_seq1
comp27878_c0_seq1 comp52625_c0_seq2
comp27878_c0_seq1 comp52673_c0_seq1
comp27878_c0_seq1 comp52977_c0_seq2
comp27878_c0_seq1 comp53068_c1_seq1
comp27878_c0_seq1 comp53265_c0_seq1
comp27878_c0_seq1 comp53478_c0_seq12
comp27878_c0_seq1 comp53553_c1_seq9
comp27878_c0_seq1 comp53561_c0_seq10
comp27878_c0_seq1 comp53921_c0_seq4
comp27878_c0_seq1 comp54003_c0_seq1
comp27878_c0_seq1 comp54256_c0_seq1
comp27878_c0_seq1 comp54270_c0_seq2
comp27878_c0_seq1 comp54277_c0_seq28
comp27878_c0_seq1 comp54424_c0_seq2
comp27878_c0_seq1 comp54461_c0_seq1
comp27878_c0_seq1 comp54510_c0_seq1
comp27878_c0_seq1 comp54532_c0_seq5
comp27878_c0_seq1 comp54600_c0_seq8
comp27878_c0_seq1 comp54652_c0_seq1
comp27878_c0_seq1 comp54867_c0_seq3
comp27878_c0_seq1 comp54933_c0_seq1
comp27878_c0_seq1 comp54953_c0_seq1
comp27878_c0_seq1 comp55117_c0_seq3
comp27878_c0_seq1 comp55236_c0_seq1
comp27878_c0_seq1 comp55237_c0_seq1
comp27878_c0_seq1 comp55279_c0_seq4
comp27878_c0_seq1 comp55378_c0_seq2
comp27878_c0_seq1 comp55544_c0_seq2
comp27878_c0_seq1 comp55549_c0_seq1
comp27878_c0_seq1 comp55582_c0_seq5
comp27878_c0_seq1 comp56037_c0_seq1
comp27878_c0_seq1 comp56146_c0_seq2
comp27878_c0_seq1 comp56174_c0_seq2
comp27878_c0_seq1 comp56200_c0_seq1
comp27878_c0_seq1 comp56209_c1_seq1
comp27878_c0_seq1 comp56276_c1_seq4
comp27878_c0_seq1 comp56287_c1_seq2
comp27878_c0_seq1 comp56372_c0_seq2
comp27878_c0_seq1 comp56396_c2_seq1
comp27878_c0_seq1 comp56514_c0_seq1
comp27878_c0_seq1 comp56517_c0_seq2
comp27878_c0_seq1 comp56526_c1_seq5
comp27878_c0_seq1 comp56530_c0_seq7
comp27878_c0_seq1 comp56578_c0_seq26
comp27878_c0_seq1 comp56668_c0_seq18
comp27878_c0_seq1 comp56671_c0_seq3
comp27878_c0_seq1 comp56798_c0_seq6
comp27878_c0_seq1 comp56806_c0_seq1
comp27878_c0_seq1 comp56832_c0_seq2
comp27878_c0_seq1 comp56913_c0_seq46
comp27878_c0_seq1 comp56916_c0_seq1
comp27878_c0_seq1 comp56956_c0_seq1
comp27878_c0_seq1 comp57087_c0_seq3
comp27878_c0_seq1 comp57107_c2_seq4
comp27878_c0_seq1 comp57135_c0_seq1
comp27878_c0_seq1 comp57291_c0_seq2
comp27878_c0_seq1 comp57469_c0_seq1
comp27878_c0_seq1 comp57638_c0_seq3
comp27878_c0_seq1 comp57653_c0_seq2
comp27878_c0_seq1 comp57664_c1_seq5
comp27878_c0_seq1 comp57717_c0_seq1
comp27878_c0_seq1 comp57724_c0_seq2
comp27878_c0_seq1 comp57746_c0_seq1
comp27878_c0_seq1 comp57821_c0_seq6
comp27878_c0_seq1 comp57824_c0_seq1
comp27878_c0_seq1 comp57829_c0_seq1
comp27878_c0_seq1 comp57862_c0_seq3
comp27878_c0_seq1 comp57876_c0_seq3
comp27878_c0_seq1 comp57880_c0_seq2
comp27878_c0_seq1 comp57910_c0_seq11
comp27878_c0_seq1 comp58141_c1_seq1
comp27878_c0_seq1 comp58161_c0_seq4
comp27878_c0_seq1 comp58182_c0_seq16
comp27878_c0_seq1 comp58198_c0_seq2
comp27878_c0_seq1 comp58238_c1_seq4
comp27878_c0_seq1 comp58280_c0_seq2
comp27878_c0_seq1 comp58299_c0_seq2
comp27878_c0_seq1 comp58481_c0_seq6
comp27878_c0_seq1 comp58523_c0_seq3
comp27878_c0_seq1 comp58663_c0_seq1
comp27878_c0_seq1 comp58670_c1_seq1
comp27878_c0_seq1 comp58805_c1_seq2
comp27878_c0_seq1 comp58819_c0_seq2
comp27878_c0_seq1 comp58829_c1_seq1
comp27878_c0_seq1 comp58962_c1_seq19
comp27878_c0_seq1 comp58992_c0_seq4
comp27878_c0_seq1 comp59037_c0_seq6
comp27878_c0_seq1 comp59109_c0_seq2
comp27878_c0_seq1 comp59302_c0_seq2
comp27878_c0_seq1 comp59310_c3_seq2
comp27878_c0_seq1 comp59327_c0_seq18
comp27878_c0_seq1 comp59343_c0_seq8
comp27878_c0_seq1 comp59385_c0_seq1
comp27878_c0_seq1 comp59396_c0_seq6
comp27878_c0_seq1 comp59437_c0_seq5
comp27878_c0_seq1 comp59438_c1_seq4
comp27878_c0_seq1 comp59509_c0_seq13
comp27878_c0_seq1 comp59647_c0_seq6
comp27878_c0_seq1 comp59704_c0_seq3
comp27878_c0_seq1 comp59822_c0_seq6
comp27878_c0_seq1 comp59868_c0_seq3
comp27878_c0_seq1 comp59871_c0_seq4
comp27878_c0_seq1 comp60050_c0_seq6
comp27878_c0_seq1 comp60076_c0_seq9
comp27878_c0_seq1 comp60136_c1_seq2
comp27878_c0_seq1 comp60149_c0_seq3
comp27878_c0_seq1 comp60161_c0_seq1
comp27878_c0_seq1 comp7195_c0_seq1
comp27878_c0_seq1 comp96767_c0_seq1
comp27878_c0_seq1 comp97705_c0_seq1
comp27898_c0_seq1 comp55206_c1_seq1
comp27954_c0_seq1 comp48858_c0_seq4
comp27954_c0_seq1 comp50007_c0_seq1
comp27954_c0_seq1 comp52778_c0_seq2
comp27954_c0_seq1 comp53955_c0_seq2
comp27954_c0_seq1 comp54765_c0_seq1
comp27954_c0_seq1 comp54908_c4_seq13
comp27954_c0_seq1 comp55286_c0_seq11
comp27954_c0_seq1 comp55354_c0_seq3
comp27954_c0_seq1 comp55711_c0_seq1
comp27954_c0_seq1 comp56579_c1_seq6
comp27954_c0_seq1 comp57800_c0_seq7
comp27954_c0_seq1 comp58162_c0_seq27
comp27954_c0_seq1 comp59568_c4_seq8
comp28089_c0_seq1 comp42481_c0_seq1
comp28089_c0_seq1 comp58276_c1_seq15
comp28194_c0_seq1 comp43153_c0_seq1
comp28194_c0_seq1 comp43474_c0_seq1
comp28194_c0_seq1 comp46415_c0_seq1
comp28194_c0_seq1 comp46890_c0_seq1
comp28194_c0_seq1 comp47168_c0_seq1
comp28194_c0_seq1 comp48545_c0_seq1
comp28194_c0_seq1 comp48557_c0_seq1
comp28194_c0_seq1 comp50730_c0_seq3
comp28194_c0_seq1 comp51578_c0_seq1
comp28194_c0_seq1 comp52258_c0_seq2
comp28194_c0_seq1 comp52958_c0_seq1
comp28194_c0_seq1 comp53237_c0_seq2
comp28194_c0_seq1 comp53905_c0_seq3
comp28194_c0_seq1 comp54559_c0_seq2
comp28194_c0_seq1 comp54717_c0_seq4
comp28194_c0_seq1 comp55873_c3_seq1
comp28194_c0_seq1 comp56084_c0_seq2
comp28194_c0_seq1 comp59625_c0_seq6
comp28194_c0_seq1 comp59800_c1_seq8
comp28282_c0_seq1 comp38070_c0_seq1
comp28282_c0_seq1 comp40576_c1_seq1
comp28282_c0_seq1 comp42040_c0_seq1
comp28282_c0_seq1 comp45191_c0_seq2
comp28282_c0_seq1 comp46934_c0_seq1
comp28282_c0_seq1 comp47257_c0_seq1
comp28282_c0_seq1 comp50305_c0_seq1
comp28282_c0_seq1 comp50574_c0_seq1
comp28282_c0_seq1 comp51342_c0_seq1
comp28282_c0_seq1 comp52956_c0_seq3
comp28282_c0_seq1 comp53514_c0_seq2
comp28282_c0_seq1 comp54270_c0_seq2
comp28282_c0_seq1 comp55882_c1_seq3
comp28282_c0_seq1 comp57189_c0_seq1
comp28282_c0_seq1 comp58299_c0_seq2
comp28282_c0_seq1 comp59489_c1_seq1
comp28282_c0_seq1 comp60842_c0_seq1
comp28401_c0_seq1 comp30079_c0_seq1
comp28401_c0_seq1 comp31302_c0_seq1
comp28401_c0_seq1 comp37254_c0_seq1
comp28401_c0_seq1 comp40810_c0_seq1
comp28401_c0_seq1 comp45811_c0_seq1
comp28401_c0_seq1 comp48997_c0_seq1
comp28401_c0_seq1 comp50943_c0_seq2
comp28401_c0_seq1 comp54580_c0_seq2
comp28401_c0_seq1 comp54736_c1_seq2
comp28401_c0_seq1 comp54868_c0_seq2
comp28401_c0_seq1 comp56187_c0_seq4
comp28401_c0_seq1 comp56385_c0_seq2
comp28401_c0_seq1 comp59027_c3_seq2
comp28430_c0_seq1 comp59395_c0_seq1
comp286234_c0_seq1 comp30911_c0_seq1
comp286234_c0_seq1 comp49609_c0_seq1
comp286830_c0_seq1 comp55258_c3_seq2
comp28697_c0_seq1 comp44226_c0_seq1
comp28726_c0_seq1 comp30079_c0_seq1
comp28726_c0_seq1 comp54580_c0_seq2
comp28726_c0_seq1 comp59027_c3_seq2
comp28881_c0_seq1 comp54580_c0_seq2
comp28881_c0_seq1 comp59339_c0_seq11
comp28940_c0_seq1 comp59994_c0_seq8
comp28946_c0_seq1 comp43474_c0_seq1
comp28946_c0_seq1 comp46415_c0_seq1
comp28946_c0_seq1 comp48557_c0_seq1
comp28946_c0_seq1 comp52258_c0_seq2
comp28946_c0_seq1 comp53237_c0_seq2
comp28946_c0_seq1 comp54559_c0_seq2
comp28946_c0_seq1 comp56084_c0_seq2
comp29287_c0_seq1 comp40576_c0_seq1
comp29287_c0_seq1 comp56891_c1_seq1
comp29287_c0_seq1 comp58624_c0_seq1
comp29307_c0_seq1 comp52745_c0_seq1
comp29307_c0_seq1 comp55754_c0_seq4
comp29307_c0_seq1 comp56762_c3_seq1
comp29307_c0_seq1 comp57149_c0_seq4
comp29307_c0_seq1 comp57311_c0_seq3
comp29307_c0_seq1 comp57612_c0_seq2
comp29307_c0_seq1 comp57812_c0_seq18
comp29307_c0_seq1 comp58396_c0_seq2
comp29307_c0_seq1 comp58915_c0_seq3
comp29307_c0_seq1 comp59120_c0_seq2
comp29307_c0_seq1 comp59390_c0_seq19
comp29307_c0_seq1 comp59562_c0_seq32
comp29307_c0_seq1 comp60080_c1_seq1
comp29392_c0_seq1 comp30911_c0_seq1
comp29392_c0_seq1 comp47257_c0_seq1
comp29392_c0_seq1 comp49609_c0_seq1
comp29392_c0_seq1 comp57189_c0_seq1
comp29392_c0_seq1 comp59489_c1_seq1
comp29569_c0_seq1 comp54487_c0_seq1
comp29569_c0_seq1 comp54851_c2_seq26
comp29620_c0_seq1 comp46900_c0_seq1
comp29621_c0_seq1 comp56523_c0_seq29
comp29836_c0_seq1 comp37155_c1_seq1
comp29836_c0_seq1 comp37817_c0_seq1
comp29836_c0_seq1 comp42055_c0_seq1
comp29836_c0_seq1 comp44244_c0_seq1
comp29836_c0_seq1 comp44252_c0_seq1
comp29836_c0_seq1 comp47183_c0_seq1
comp29836_c0_seq1 comp49735_c0_seq1
comp29836_c0_seq1 comp49904_c0_seq1
comp29836_c0_seq1 comp50155_c0_seq3
comp29836_c0_seq1 comp51792_c0_seq2
comp29836_c0_seq1 comp53051_c0_seq5
comp29836_c0_seq1 comp60064_c0_seq1
comp29836_c0_seq1 comp60981_c0_seq1
comp29876_c0_seq1 comp54580_c0_seq2
comp29916_c0_seq1 comp44577_c0_seq1
comp29916_c0_seq1 comp47140_c0_seq1
comp29916_c0_seq1 comp50178_c0_seq1
comp29916_c0_seq1 comp50548_c0_seq1
comp29916_c0_seq1 comp51313_c0_seq1
comp29916_c0_seq1 comp52068_c0_seq3
comp29916_c0_seq1 comp52075_c0_seq1
comp29916_c0_seq1 comp55030_c0_seq1
comp29916_c0_seq1 comp55263_c1_seq2
comp29916_c0_seq1 comp56526_c1_seq5
comp29916_c0_seq1 comp57552_c0_seq4
comp29916_c0_seq1 comp57909_c0_seq3
comp29916_c0_seq1 comp58794_c0_seq3
comp29916_c0_seq1 comp58859_c0_seq17
comp29916_c0_seq1 comp59227_c0_seq2
comp29916_c0_seq1 comp59328_c0_seq1
comp29916_c0_seq1 comp59650_c1_seq1
comp29918_c0_seq1 comp43474_c0_seq1
comp29918_c0_seq1 comp46415_c0_seq1
comp29918_c0_seq1 comp48557_c0_seq1
comp29918_c0_seq1 comp52258_c0_seq2
comp29918_c0_seq1 comp53237_c0_seq2
comp29918_c0_seq1 comp54559_c0_seq2
comp29918_c0_seq1 comp55121_c0_seq2
comp29918_c0_seq1 comp56084_c0_seq2
comp29918_c0_seq1 comp58271_c1_seq2
comp29920_c0_seq1 comp50730_c0_seq3
comp30079_c0_seq1 comp30921_c0_seq1
comp30079_c0_seq1 comp31302_c0_seq1
comp30079_c0_seq1 comp32664_c0_seq1
comp30079_c0_seq1 comp32966_c0_seq1
comp30079_c0_seq1 comp33785_c0_seq1
comp30079_c0_seq1 comp34212_c0_seq1
comp30079_c0_seq1 comp36354_c0_seq1
comp30079_c0_seq1 comp37254_c0_seq1
comp30079_c0_seq1 comp40810_c0_seq1
comp30079_c0_seq1 comp43474_c0_seq1
comp30079_c0_seq1 comp44558_c1_seq3
comp30079_c0_seq1 comp45392_c0_seq1
comp30079_c0_seq1 comp45575_c0_seq1
comp30079_c0_seq1 comp45811_c0_seq1
comp30079_c0_seq1 comp46415_c0_seq1
comp30079_c0_seq1 comp47031_c0_seq1
comp30079_c0_seq1 comp47137_c1_seq1
comp30079_c0_seq1 comp48557_c0_seq1
comp30079_c0_seq1 comp48725_c0_seq2
comp30079_c0_seq1 comp48879_c0_seq1
comp30079_c0_seq1 comp48997_c0_seq1
comp30079_c0_seq1 comp49548_c0_seq3
comp30079_c0_seq1 comp50943_c0_seq2
comp30079_c0_seq1 comp51526_c0_seq6
comp30079_c0_seq1 comp52258_c0_seq2
comp30079_c0_seq1 comp52518_c0_seq2
comp30079_c0_seq1 comp53237_c0_seq2
comp30079_c0_seq1 comp53452_c0_seq2
comp30079_c0_seq1 comp53900_c0_seq1
comp30079_c0_seq1 comp54559_c0_seq2
comp30079_c0_seq1 comp54736_c1_seq2
comp30079_c0_seq1 comp54868_c0_seq2
comp30079_c0_seq1 comp56084_c0_seq2
comp30079_c0_seq1 comp56187_c0_seq4
comp30079_c0_seq1 comp56293_c1_seq1
comp30079_c0_seq1 comp56385_c0_seq2
comp30079_c0_seq1 comp56456_c0_seq1
comp30079_c0_seq1 comp56621_c0_seq4
comp30079_c0_seq1 comp57847_c0_seq5
comp30079_c0_seq1 comp72426_c0_seq1
comp30109_c0_seq1 comp30911_c0_seq1
comp30109_c0_seq1 comp41342_c0_seq1
comp30109_c0_seq1 comp44200_c0_seq1
comp30109_c0_seq1 comp49609_c0_seq1
comp30109_c0_seq1 comp52031_c0_seq2
comp30109_c0_seq1 comp52501_c0_seq1
comp3022_c0_seq1 comp52124_c0_seq1
comp3022_c0_seq1 comp59395_c0_seq1
comp30235_c0_seq1 comp31659_c0_seq1
comp30235_c0_seq1 comp48216_c0_seq1
comp30235_c0_seq1 comp54211_c1_seq1
comp30235_c0_seq1 comp54644_c0_seq1
comp30242_c0_seq1 comp31659_c0_seq1
comp30242_c0_seq1 comp48216_c0_seq1
comp30242_c0_seq1 comp54211_c1_seq1
comp30242_c0_seq1 comp54644_c0_seq1
comp304932_c0_seq1 comp43474_c0_seq1
comp304932_c0_seq1 comp46415_c0_seq1
comp304932_c0_seq1 comp48557_c0_seq1
comp304932_c0_seq1 comp52258_c0_seq2
comp304932_c0_seq1 comp53237_c0_seq2
comp304932_c0_seq1 comp54559_c0_seq2
comp304932_c0_seq1 comp56084_c0_seq2
comp30575_c0_seq1 comp54467_c0_seq2
comp30739_c0_seq1 comp43474_c0_seq1
comp30739_c0_seq1 comp46415_c0_seq1
comp30739_c0_seq1 comp48557_c0_seq1
comp30739_c0_seq1 comp52258_c0_seq2
comp30739_c0_seq1 comp53237_c0_seq2
comp30739_c0_seq1 comp54559_c0_seq2
comp30739_c0_seq1 comp55570_c0_seq1
comp30739_c0_seq1 comp56084_c0_seq2
comp30739_c0_seq1 comp59141_c0_seq15
comp30739_c0_seq1 comp59262_c0_seq1
comp30739_c0_seq1 comp59571_c1_seq2
comp30739_c0_seq1 comp60007_c0_seq12
comp30874_c0_seq1 comp51645_c0_seq1
comp30874_c0_seq1 comp54580_c0_seq2
comp30887_c0_seq1 comp51898_c0_seq2
comp30911_c0_seq1 comp3350_c0_seq1
comp30911_c0_seq1 comp34188_c0_seq1
comp30911_c0_seq1 comp34682_c0_seq1
comp30911_c0_seq1 comp39139_c0_seq1
comp30911_c0_seq1 comp40644_c0_seq1
comp30911_c0_seq1 comp40752_c1_seq1
comp30911_c0_seq1 comp40810_c0_seq1
comp30911_c0_seq1 comp43821_c0_seq1
comp30911_c0_seq1 comp45811_c0_seq1
comp30911_c0_seq1 comp46083_c0_seq2
comp30911_c0_seq1 comp46444_c0_seq1
comp30911_c0_seq1 comp48171_c0_seq1
comp30911_c0_seq1 comp48268_c0_seq2
comp30911_c0_seq1 comp48997_c0_seq1
comp30911_c0_seq1 comp50421_c0_seq1
comp30911_c0_seq1 comp50624_c0_seq2
comp30911_c0_seq1 comp50943_c0_seq2
comp30911_c0_seq1 comp51444_c0_seq1
comp30911_c0_seq1 comp52031_c0_seq2
comp30911_c0_seq1 comp53376_c0_seq1
comp30911_c0_seq1 comp53988_c0_seq2
comp30911_c0_seq1 comp54302_c0_seq2
comp30911_c0_seq1 comp54868_c0_seq2
comp30911_c0_seq1 comp55379_c1_seq2
comp30911_c0_seq1 comp56083_c0_seq2
comp30911_c0_seq1 comp56346_c0_seq2
comp30911_c0_seq1 comp56385_c0_seq2
comp30911_c0_seq1 comp68783_c0_seq1
comp30911_c0_seq1 comp73695_c0_seq1
comp30921_c0_seq1 comp45811_c0_seq1
comp30921_c0_seq1 comp48997_c0_seq1
comp30921_c0_seq1 comp50943_c0_seq2
comp30921_c0_seq1 comp54580_c0_seq2
comp30921_c0_seq1 comp59027_c3_seq2
comp31162_c0_seq1 comp43474_c0_seq1
comp31162_c0_seq1 comp46415_c0_seq1
comp31162_c0_seq1 comp48557_c0_seq1
comp31162_c0_seq1 comp52258_c0_seq2
comp31162_c0_seq1 comp53237_c0_seq2
comp31162_c0_seq1 comp54510_c0_seq1
comp31162_c0_seq1 comp54559_c0_seq2
comp31162_c0_seq1 comp56084_c0_seq2
comp31162_c0_seq1 comp56200_c0_seq1
comp31162_c0_seq1 comp56209_c1_seq1
comp31162_c0_seq1 comp56514_c0_seq1
comp31302_c0_seq1 comp45811_c0_seq1
comp31302_c0_seq1 comp48997_c0_seq1
comp31302_c0_seq1 comp49548_c0_seq3
comp31302_c0_seq1 comp50943_c0_seq2
comp31302_c0_seq1 comp59027_c3_seq2
comp31604_c0_seq1 comp56015_c3_seq1
comp31659_c0_seq1 comp353500_c0_seq1
comp31659_c0_seq1 comp361220_c0_seq1
comp31659_c0_seq1 comp42186_c0_seq1
comp31659_c0_seq1 comp42745_c0_seq1
comp31659_c0_seq1 comp44225_c0_seq2
comp31659_c0_seq1 comp46711_c0_seq3
comp31659_c0_seq1 comp47010_c0_seq1
comp31659_c0_seq1 comp47862_c0_seq4
comp31659_c0_seq1 comp48216_c0_seq1
comp31659_c0_seq1 comp51898_c0_seq2
comp31659_c0_seq1 comp54211_c1_seq1
comp31659_c0_seq1 comp54325_c0_seq1
comp31659_c0_seq1 comp54644_c0_seq1
comp31659_c0_seq1 comp56070_c0_seq14
comp31688_c0_seq1 comp44574_c0_seq1
comp31688_c0_seq1 comp54035_c0_seq3
comp31876_c0_seq1 comp48010_c0_seq1
comp31881_c0_seq1 comp44577_c0_seq1
comp31881_c0_seq1 comp50178_c0_seq1
comp31881_c0_seq1 comp54580_c0_seq2
comp31881_c0_seq1 comp55030_c0_seq1
comp31881_c0_seq1 comp55263_c1_seq2
comp31881_c0_seq1 comp57552_c0_seq4
comp31881_c0_seq1 comp57909_c0_seq3
comp31910_c0_seq1 comp47140_c0_seq1
comp32046_c0_seq1 comp54912_c0_seq1
comp32046_c0_seq1 comp58244_c0_seq2
comp32046_c0_seq1 comp59658_c2_seq3
comp32095_c0_seq1 comp52124_c0_seq1
comp32095_c0_seq1 comp59395_c0_seq1
comp32115_c0_seq1 comp50305_c0_seq1
comp32281_c0_seq1 comp51297_c0_seq5
comp32281_c0_seq1 comp56894_c0_seq1
comp32281_c0_seq1 comp58966_c0_seq2
comp32281_c0_seq1 comp59540_c0_seq3
comp32281_c0_seq1 comp59647_c0_seq6
comp32291_c0_seq1 comp43474_c0_seq1
comp32291_c0_seq1 comp46415_c0_seq1
comp32291_c0_seq1 comp48557_c0_seq1
comp32291_c0_seq1 comp52258_c0_seq2
comp32291_c0_seq1 comp53237_c0_seq2
comp32291_c0_seq1 comp54559_c0_seq2
comp32291_c0_seq1 comp56084_c0_seq2
comp32415_c0_seq1 comp46830_c0_seq1
comp32415_c0_seq1 comp59021_c0_seq13
comp32582_c0_seq1 comp54580_c0_seq2
comp32590_c0_seq1 comp40952_c0_seq1
comp32590_c0_seq1 comp42811_c0_seq2
comp32590_c0_seq1 comp43846_c0_seq2
comp32590_c0_seq1 comp52437_c0_seq1
comp32590_c0_seq1 comp54809_c0_seq1
comp32590_c0_seq1 comp55654_c1_seq27
comp32590_c0_seq1 comp57248_c0_seq1
comp32590_c0_seq1 comp57483_c0_seq5
comp32590_c0_seq1 comp57936_c0_seq1
comp32590_c0_seq1 comp58073_c0_seq1
comp32590_c0_seq1 comp58844_c0_seq16
comp32590_c0_seq1 comp59038_c0_seq3
comp32590_c0_seq1 comp59370_c0_seq1
comp32590_c0_seq1 comp59742_c1_seq3
comp32590_c0_seq1 comp59973_c0_seq6
comp32664_c0_seq1 comp3564_c0_seq1
comp32664_c0_seq1 comp43474_c0_seq1
comp32664_c0_seq1 comp46415_c0_seq1
comp32664_c0_seq1 comp48557_c0_seq1
comp32664_c0_seq1 comp52258_c0_seq2
comp32664_c0_seq1 comp53237_c0_seq2
comp32664_c0_seq1 comp54559_c0_seq2
comp32664_c0_seq1 comp56084_c0_seq2
comp32664_c0_seq1 comp56282_c0_seq2
comp32664_c0_seq1 comp57017_c0_seq2
comp32664_c0_seq1 comp58157_c0_seq2
comp32664_c0_seq1 comp59027_c3_seq2
comp32683_c0_seq1 comp47140_c0_seq1
comp32722_c0_seq1 comp59994_c0_seq8
comp32772_c0_seq1 comp44260_c0_seq1
comp32772_c0_seq1 comp49761_c0_seq1
comp32772_c0_seq1 comp50421_c0_seq1
comp32772_c0_seq1 comp51658_c0_seq1
comp32772_c0_seq1 comp52358_c0_seq3
comp32772_c0_seq1 comp53988_c0_seq2
comp32772_c0_seq1 comp54679_c0_seq1
comp32772_c0_seq1 comp55138_c0_seq1
comp32772_c0_seq1 comp56180_c0_seq1
comp32772_c0_seq1 comp59031_c0_seq28
comp32894_c0_seq1 comp33733_c0_seq1
comp32894_c0_seq1 comp36532_c0_seq2
comp32894_c0_seq1 comp52136_c0_seq1
comp32894_c0_seq1 comp56297_c0_seq2
comp32894_c0_seq1 comp57260_c0_seq12
comp32894_c0_seq1 comp57625_c1_seq31
comp32894_c0_seq1 comp58770_c0_seq8
comp32894_c0_seq1 comp58824_c1_seq21
comp32894_c0_seq1 comp59497_c0_seq12
comp32966_c0_seq1 comp33736_c0_seq1
comp32966_c0_seq1 comp43377_c0_seq1
comp32966_c0_seq1 comp44235_c0_seq1
comp32966_c0_seq1 comp45811_c0_seq1
comp32966_c0_seq1 comp48997_c0_seq1
comp32966_c0_seq1 comp50943_c0_seq2
comp32966_c0_seq1 comp5604_c0_seq1
comp32966_c0_seq1 comp59027_c3_seq2
comp33264_c0_seq1 comp51664_c0_seq1
comp33295_c0_seq1 comp57771_c0_seq3
comp33295_c0_seq1 comp57782_c3_seq4
comp33348_c0_seq1 comp54580_c0_seq2
comp33349_c0_seq2 comp52068_c0_seq3
comp33349_c0_seq2 comp54503_c0_seq1
comp33349_c0_seq2 comp57384_c0_seq4
comp33349_c0_seq2 comp57634_c2_seq2
comp33349_c0_seq2 comp58061_c0_seq7
comp33349_c0_seq2 comp59157_c1_seq1
comp3350_c0_seq1 comp41342_c0_seq1
comp3350_c0_seq1 comp44200_c0_seq1
comp3350_c0_seq1 comp49609_c0_seq1
comp3350_c0_seq1 comp52031_c0_seq2
comp3350_c0_seq1 comp52501_c0_seq1
comp33502_c0_seq1 comp36532_c0_seq2
comp33733_c0_seq1 comp38525_c0_seq1
comp33733_c0_seq1 comp45452_c0_seq2
comp33733_c0_seq1 comp46529_c0_seq1
comp33733_c0_seq1 comp48547_c0_seq1
comp33733_c0_seq1 comp50121_c0_seq1
comp33733_c0_seq1 comp52413_c0_seq3
comp33733_c0_seq1 comp52487_c0_seq1
comp33733_c0_seq1 comp52913_c0_seq1
comp33733_c0_seq1 comp54858_c0_seq2
comp33733_c0_seq1 comp55386_c0_seq34
comp33733_c0_seq1 comp56404_c3_seq10
comp33733_c0_seq1 comp57067_c0_seq3
comp33733_c0_seq1 comp57662_c0_seq3
comp33733_c0_seq1 comp57883_c0_seq6
comp33733_c0_seq1 comp58069_c0_seq22
comp33733_c0_seq1 comp59257_c0_seq7
comp33733_c0_seq1 comp59862_c0_seq7
comp33733_c0_seq1 comp60146_c0_seq7
comp33785_c0_seq1 comp47295_c0_seq4
comp33785_c0_seq1 comp51867_c0_seq1
comp33785_c0_seq1 comp59027_c3_seq2
comp33785_c0_seq1 comp86063_c0_seq1
comp33825_c0_seq1 comp44577_c0_seq1
comp33825_c0_seq1 comp47140_c0_seq1
comp33825_c0_seq1 comp50178_c0_seq1
comp33825_c0_seq1 comp50548_c0_seq1
comp33825_c0_seq1 comp51313_c0_seq1
comp33825_c0_seq1 comp52068_c0_seq3
comp33825_c0_seq1 comp52075_c0_seq1
comp33825_c0_seq1 comp55030_c0_seq1
comp33825_c0_seq1 comp55263_c1_seq2
comp33825_c0_seq1 comp56526_c1_seq5
comp33825_c0_seq1 comp57552_c0_seq4
comp33825_c0_seq1 comp57909_c0_seq3
comp33825_c0_seq1 comp58794_c0_seq3
comp33825_c0_seq1 comp58859_c0_seq17
comp33825_c0_seq1 comp59227_c0_seq2
comp33825_c0_seq1 comp59328_c0_seq1
comp33825_c0_seq1 comp59650_c1_seq1
comp33862_c0_seq1 comp51265_c0_seq10
comp33862_c0_seq1 comp56096_c0_seq3
comp33937_c0_seq1 comp54580_c0_seq2
comp33937_c0_seq1 comp56152_c0_seq2
comp33937_c0_seq1 comp56442_c0_seq4
comp33937_c0_seq1 comp56554_c0_seq2
comp33937_c0_seq1 comp59291_c1_seq1
comp34070_c0_seq1 comp59994_c0_seq8
comp34072_c0_seq1 comp41457_c1_seq2
comp34072_c0_seq1 comp44577_c0_seq1
comp34072_c0_seq1 comp47140_c0_seq1
comp34072_c0_seq1 comp48216_c0_seq1
comp34072_c0_seq1 comp50178_c0_seq1
comp34072_c0_seq1 comp51898_c0_seq2
comp34072_c0_seq1 comp54211_c1_seq1
comp34072_c0_seq1 comp54644_c0_seq1
comp34072_c0_seq1 comp55155_c0_seq2
comp34072_c0_seq1 comp56523_c0_seq29
comp34072_c0_seq1 comp57909_c0_seq3
comp34072_c0_seq1 comp58393_c0_seq7
comp34072_c0_seq1 comp59300_c0_seq20
comp34112_c0_seq1 comp44492_c0_seq2
comp34112_c0_seq1 comp58919_c0_seq1
comp34188_c0_seq1 comp3564_c0_seq1
comp34188_c0_seq1 comp45811_c0_seq1
comp34188_c0_seq1 comp48997_c0_seq1
comp34188_c0_seq1 comp49609_c0_seq1
comp34188_c0_seq1 comp50421_c0_seq1
comp34188_c0_seq1 comp50943_c0_seq2
comp34188_c0_seq1 comp53988_c0_seq2
comp34188_c0_seq1 comp57017_c0_seq2
comp34200_c0_seq1 comp52220_c0_seq2
comp34200_c0_seq1 comp57476_c2_seq3
comp34212_c0_seq1 comp59027_c3_seq2
comp34357_c0_seq1 comp39361_c1_seq1
comp34360_c0_seq1 comp54580_c0_seq2
comp34386_c0_seq1 comp43884_c0_seq1
comp34386_c0_seq1 comp52075_c0_seq1
comp34386_c0_seq1 comp52619_c0_seq1
comp34386_c0_seq1 comp56463_c0_seq3
comp34386_c0_seq1 comp58794_c0_seq3
comp34386_c0_seq1 comp58859_c0_seq17
comp34386_c0_seq1 comp59328_c0_seq1
comp34386_c0_seq1 comp59650_c1_seq1
comp34448_c0_seq1 comp55850_c0_seq2
comp34656_c0_seq1 comp74186_c0_seq1
comp34682_c0_seq1 comp3564_c0_seq1
comp34682_c0_seq1 comp43851_c0_seq1
comp34682_c0_seq1 comp45811_c0_seq1
comp34682_c0_seq1 comp48997_c0_seq1
comp34682_c0_seq1 comp49609_c0_seq1
comp34682_c0_seq1 comp50943_c0_seq2
comp34682_c0_seq1 comp57017_c0_seq2
comp34736_c0_seq1 comp56152_c0_seq2
comp34736_c0_seq1 comp56523_c0_seq29
comp34736_c0_seq1 comp56554_c0_seq2
comp34745_c0_seq1 comp59357_c0_seq14
comp35143_c0_seq1 comp43474_c0_seq1
comp35143_c0_seq1 comp46415_c0_seq1
comp35143_c0_seq1 comp48557_c0_seq1
comp35143_c0_seq1 comp52258_c0_seq2
comp35143_c0_seq1 comp53237_c0_seq2
comp35143_c0_seq1 comp54559_c0_seq2
comp35143_c0_seq1 comp56084_c0_seq2
comp3520_c0_seq1 comp54487_c0_seq1
comp3520_c0_seq1 comp54851_c2_seq26
comp35210_c0_seq1 comp54580_c0_seq2
comp353500_c0_seq1 comp42186_c0_seq1
comp353500_c0_seq1 comp42745_c0_seq1
comp353500_c0_seq1 comp44225_c0_seq2
comp353500_c0_seq1 comp47010_c0_seq1
comp353500_c0_seq1 comp48216_c0_seq1
comp353500_c0_seq1 comp54211_c1_seq1
comp353500_c0_seq1 comp54325_c0_seq1
comp353500_c0_seq1 comp54352_c0_seq2
comp353500_c0_seq1 comp54644_c0_seq1
comp353500_c0_seq1 comp56070_c0_seq14
comp353500_c0_seq1 comp56834_c0_seq5
comp354_c0_seq1 comp39407_c0_seq1
comp354_c0_seq1 comp40739_c0_seq1
comp354_c0_seq1 comp40989_c0_seq1
comp354_c0_seq1 comp43019_c0_seq2
comp354_c0_seq1 comp46904_c2_seq1
comp354_c0_seq1 comp47798_c0_seq1
comp354_c0_seq1 comp48181_c0_seq2
comp354_c0_seq1 comp48745_c0_seq1
comp354_c0_seq1 comp49615_c0_seq2
comp354_c0_seq1 comp50798_c0_seq1
comp354_c0_seq1 comp51661_c0_seq1
comp354_c0_seq1 comp53058_c0_seq1
comp354_c0_seq1 comp53501_c0_seq3
comp354_c0_seq1 comp53664_c0_seq2
comp354_c0_seq1 comp53831_c0_seq3
comp354_c0_seq1 comp54045_c0_seq3
comp354_c0_seq1 comp54316_c0_seq5
comp354_c0_seq1 comp54483_c0_seq2
comp354_c0_seq1 comp54673_c0_seq2
comp354_c0_seq1 comp55962_c0_seq2
comp354_c0_seq1 comp56809_c0_seq1
comp354_c0_seq1 comp56951_c0_seq2
comp354_c0_seq1 comp57021_c0_seq3
comp354_c0_seq1 comp57518_c0_seq1
comp354_c0_seq1 comp57864_c0_seq1
comp354_c0_seq1 comp58049_c1_seq1
comp354_c0_seq1 comp58151_c1_seq2
comp354_c0_seq1 comp58345_c0_seq1
comp354_c0_seq1 comp58686_c1_seq1
comp354_c0_seq1 comp60158_c0_seq3
comp3564_c0_seq1 comp36672_c0_seq1
comp3564_c0_seq1 comp40644_c0_seq1
comp3564_c0_seq1 comp40810_c0_seq1
comp3564_c0_seq1 comp43474_c0_seq1
comp3564_c0_seq1 comp46415_c0_seq1
comp3564_c0_seq1 comp48557_c0_seq1
comp3564_c0_seq1 comp49280_c0_seq6
comp3564_c0_seq1 comp50421_c0_seq1
comp3564_c0_seq1 comp52258_c0_seq2
comp3564_c0_seq1 comp53237_c0_seq2
comp3564_c0_seq1 comp53452_c0_seq2
comp3564_c0_seq1 comp54559_c0_seq2
comp3564_c0_seq1 comp54868_c0_seq2
comp3564_c0_seq1 comp55138_c0_seq1
comp3564_c0_seq1 comp55379_c1_seq2
comp3564_c0_seq1 comp56083_c0_seq2
comp3564_c0_seq1 comp56084_c0_seq2
comp3564_c0_seq1 comp56385_c0_seq2
comp3564_c0_seq1 comp58157_c0_seq2
comp3564_c0_seq1 comp6889_c0_seq1
comp35881_c0_seq1 comp47992_c0_seq1
comp35881_c0_seq1 comp55729_c0_seq2
comp35953_c0_seq1 comp56585_c0_seq1
comp36022_c0_seq1 comp49735_c0_seq1
comp36090_c0_seq1 comp48223_c0_seq3
comp361220_c0_seq1 comp48216_c0_seq1
comp361220_c0_seq1 comp54211_c1_seq1
comp361220_c0_seq1 comp54644_c0_seq1
comp36266_c0_seq2 comp58499_c0_seq2
comp36266_c0_seq2 comp59143_c2_seq4
comp36266_c0_seq2 comp59795_c0_seq4
comp36269_c0_seq1 comp44577_c0_seq1
comp36269_c0_seq1 comp50178_c0_seq1
comp36269_c0_seq1 comp54580_c0_seq2
comp36269_c0_seq1 comp57909_c0_seq3
comp36343_c0_seq1 comp48194_c0_seq1
comp36343_c0_seq1 comp59844_c0_seq2
comp36354_c0_seq1 comp52745_c0_seq1
comp36354_c0_seq1 comp54580_c0_seq2
comp36354_c0_seq1 comp56762_c3_seq1
comp36354_c0_seq1 comp57612_c0_seq2
comp36354_c0_seq1 comp58396_c0_seq2
comp36354_c0_seq1 comp59027_c3_seq2
comp36354_c0_seq1 comp59120_c0_seq2
comp36354_c0_seq1 comp60080_c1_seq1
comp36511_c0_seq1 comp46135_c0_seq5
comp36511_c0_seq1 comp55438_c3_seq1
comp36532_c0_seq2 comp42918_c0_seq3
comp36532_c0_seq2 comp46529_c0_seq1
comp36532_c0_seq2 comp47459_c0_seq1
comp36532_c0_seq2 comp47915_c0_seq1
comp36532_c0_seq2 comp47977_c0_seq1
comp36532_c0_seq2 comp48101_c0_seq2
comp36532_c0_seq2 comp50121_c0_seq1
comp36532_c0_seq2 comp52215_c0_seq1
comp36532_c0_seq2 comp55386_c0_seq34
comp36634_c0_seq2 comp54119_c0_seq1
comp36634_c0_seq2 comp55347_c0_seq2
comp36634_c0_seq2 comp58694_c1_seq5
comp36672_c0_seq1 comp57017_c0_seq2
comp36726_c0_seq1 comp43474_c0_seq1
comp36726_c0_seq1 comp46415_c0_seq1
comp36726_c0_seq1 comp48557_c0_seq1
comp36726_c0_seq1 comp52258_c0_seq2
comp36726_c0_seq1 comp53237_c0_seq2
comp36726_c0_seq1 comp54559_c0_seq2
comp36726_c0_seq1 comp56084_c0_seq2
comp36747_c0_seq1 comp38553_c0_seq1
comp36747_c0_seq1 comp39892_c0_seq1
comp36747_c0_seq1 comp51990_c1_seq3
comp36747_c0_seq1 comp58554_c1_seq3
comp367522_c0_seq1 comp45198_c0_seq1
comp367522_c0_seq1 comp54456_c0_seq5
comp36794_c0_seq1 comp54580_c0_seq2
comp36875_c0_seq1 comp57919_c0_seq11
comp36876_c0_seq1 comp42518_c0_seq1
comp36876_c0_seq1 comp44341_c0_seq1
comp36876_c0_seq1 comp46005_c0_seq1
comp36876_c0_seq1 comp56727_c0_seq1
comp36876_c0_seq1 comp56911_c1_seq1
comp36876_c0_seq1 comp58402_c1_seq1
comp36876_c0_seq1 comp59807_c0_seq1
comp36876_c0_seq1 comp96305_c0_seq1
comp37155_c1_seq1 comp37817_c0_seq1
comp37155_c1_seq1 comp42055_c0_seq1
comp37155_c1_seq1 comp44071_c0_seq1
comp37155_c1_seq1 comp44244_c0_seq1
comp37155_c1_seq1 comp44252_c0_seq1
comp37155_c1_seq1 comp46934_c0_seq1
comp37155_c1_seq1 comp47183_c0_seq1
comp37155_c1_seq1 comp49274_c0_seq1
comp37155_c1_seq1 comp49735_c0_seq1
comp37155_c1_seq1 comp49904_c0_seq1
comp37155_c1_seq1 comp50155_c0_seq3
comp37155_c1_seq1 comp50948_c0_seq1
comp37155_c1_seq1 comp51792_c0_seq2
comp37155_c1_seq1 comp52368_c0_seq11
comp37155_c1_seq1 comp52795_c0_seq2
comp37155_c1_seq1 comp53051_c0_seq5
comp37155_c1_seq1 comp53526_c1_seq3
comp37155_c1_seq1 comp55536_c0_seq1
comp37155_c1_seq1 comp56008_c4_seq1
comp37155_c1_seq1 comp56631_c0_seq24
comp37155_c1_seq1 comp58724_c0_seq2
comp37155_c1_seq1 comp60981_c0_seq1
comp37254_c0_seq1 comp45811_c0_seq1
comp37254_c0_seq1 comp48997_c0_seq1
comp37254_c0_seq1 comp49548_c0_seq3
comp37254_c0_seq1 comp50943_c0_seq2
comp37254_c0_seq1 comp54580_c0_seq2
comp37254_c0_seq1 comp59027_c3_seq2
comp37268_c0_seq1 comp52208_c0_seq2
comp37268_c0_seq1 comp56152_c0_seq2
comp37268_c0_seq1 comp56554_c0_seq2
comp37268_c0_seq1 comp56829_c0_seq2
comp37268_c0_seq1 comp59339_c0_seq11
comp37321_c0_seq1 comp44577_c0_seq1
comp37321_c0_seq1 comp50178_c0_seq1
comp37321_c0_seq1 comp55030_c0_seq1
comp37321_c0_seq1 comp55263_c1_seq2
comp37321_c0_seq1 comp57552_c0_seq4
comp37321_c0_seq1 comp57909_c0_seq3
comp37421_c0_seq1 comp43474_c0_seq1
comp37421_c0_seq1 comp46415_c0_seq1
comp37421_c0_seq1 comp46830_c0_seq1
comp37421_c0_seq1 comp48557_c0_seq1
comp37421_c0_seq1 comp52258_c0_seq2
comp37421_c0_seq1 comp53237_c0_seq2
comp37421_c0_seq1 comp54559_c0_seq2
comp37421_c0_seq1 comp56084_c0_seq2
comp37421_c0_seq1 comp59021_c0_seq13
comp37721_c0_seq1 comp54580_c0_seq2
comp37817_c0_seq1 comp42055_c0_seq1
comp37817_c0_seq1 comp44071_c0_seq1
comp37817_c0_seq1 comp44244_c0_seq1
comp37817_c0_seq1 comp44252_c0_seq1
comp37817_c0_seq1 comp46934_c0_seq1
comp37817_c0_seq1 comp47183_c0_seq1
comp37817_c0_seq1 comp48160_c0_seq1
comp37817_c0_seq1 comp48433_c0_seq1
comp37817_c0_seq1 comp49274_c0_seq1
comp37817_c0_seq1 comp49735_c0_seq1
comp37817_c0_seq1 comp49904_c0_seq1
comp37817_c0_seq1 comp50155_c0_seq3
comp37817_c0_seq1 comp50255_c0_seq1
comp37817_c0_seq1 comp50948_c0_seq1
comp37817_c0_seq1 comp51031_c0_seq2
comp37817_c0_seq1 comp51792_c0_seq2
comp37817_c0_seq1 comp52368_c0_seq11
comp37817_c0_seq1 comp52755_c2_seq1
comp37817_c0_seq1 comp52795_c0_seq2
comp37817_c0_seq1 comp53051_c0_seq5
comp37817_c0_seq1 comp53526_c1_seq3
comp37817_c0_seq1 comp53815_c0_seq1
comp37817_c0_seq1 comp54580_c0_seq2
comp37817_c0_seq1 comp55536_c0_seq1
comp37817_c0_seq1 comp56008_c4_seq1
comp37817_c0_seq1 comp56631_c0_seq24
comp37817_c0_seq1 comp58724_c0_seq2
comp37817_c0_seq1 comp59235_c1_seq10
comp37817_c0_seq1 comp60695_c0_seq1
comp37817_c0_seq1 comp60981_c0_seq1
comp38070_c0_seq1 comp40576_c1_seq1
comp38070_c0_seq1 comp42040_c0_seq1
comp38070_c0_seq1 comp45191_c0_seq2
comp38070_c0_seq1 comp46934_c0_seq1
comp38070_c0_seq1 comp47257_c0_seq1
comp38070_c0_seq1 comp50305_c0_seq1
comp38070_c0_seq1 comp51342_c0_seq1
comp38070_c0_seq1 comp52956_c0_seq3
comp38070_c0_seq1 comp54270_c0_seq2
comp38070_c0_seq1 comp55882_c1_seq3
comp38070_c0_seq1 comp58299_c0_seq2
comp38070_c0_seq1 comp59489_c1_seq1
comp38070_c0_seq1 comp60842_c0_seq1
comp38122_c0_seq1 comp54503_c0_seq1
comp38122_c0_seq1 comp57384_c0_seq4
comp38122_c0_seq1 comp57634_c2_seq2
comp38122_c0_seq1 comp58061_c0_seq7
comp38122_c0_seq1 comp59157_c1_seq1
comp38266_c0_seq1 comp44574_c0_seq1
comp38266_c0_seq1 comp46816_c0_seq1
comp38266_c0_seq1 comp47140_c0_seq1
comp38266_c0_seq1 comp48135_c0_seq1
comp38266_c0_seq1 comp51465_c0_seq1
comp38266_c0_seq1 comp51851_c0_seq2
comp38266_c0_seq1 comp54035_c0_seq3
comp38266_c0_seq1 comp56442_c0_seq4
comp38266_c0_seq1 comp56523_c0_seq29
comp38266_c0_seq1 comp56598_c0_seq9
comp38266_c0_seq1 comp56781_c0_seq35
comp38339_c0_seq1 comp47140_c0_seq1
comp38339_c0_seq1 comp56758_c0_seq16
comp38525_c0_seq1 comp48729_c0_seq1
comp38525_c0_seq1 comp52136_c0_seq1
comp38525_c0_seq1 comp56297_c0_seq2
comp38525_c0_seq1 comp57148_c0_seq3
comp38525_c0_seq1 comp57260_c0_seq12
comp38525_c0_seq1 comp57625_c1_seq31
comp38525_c0_seq1 comp58770_c0_seq8
comp38525_c0_seq1 comp58824_c1_seq21
comp38525_c0_seq1 comp59497_c0_seq12
comp38553_c0_seq1 comp39892_c0_seq1
comp38553_c0_seq1 comp44577_c0_seq1
comp38553_c0_seq1 comp50178_c0_seq1
comp38553_c0_seq1 comp51990_c1_seq3
comp38553_c0_seq1 comp52208_c0_seq2
comp38553_c0_seq1 comp55030_c0_seq1
comp38553_c0_seq1 comp55263_c1_seq2
comp38553_c0_seq1 comp57552_c0_seq4
comp38553_c0_seq1 comp57909_c0_seq3
comp38553_c0_seq1 comp58554_c1_seq3
comp38571_c0_seq1 comp44492_c0_seq2
comp38753_c0_seq1 comp44577_c0_seq1
comp38753_c0_seq1 comp50178_c0_seq1
comp38753_c0_seq1 comp50548_c0_seq1
comp38753_c0_seq1 comp51313_c0_seq1
comp38753_c0_seq1 comp52068_c0_seq3
comp38753_c0_seq1 comp52075_c0_seq1
comp38753_c0_seq1 comp55030_c0_seq1
comp38753_c0_seq1 comp55263_c1_seq2
comp38753_c0_seq1 comp56526_c1_seq5
comp38753_c0_seq1 comp57552_c0_seq4
comp38753_c0_seq1 comp57909_c0_seq3
comp38753_c0_seq1 comp58794_c0_seq3
comp38753_c0_seq1 comp58859_c0_seq17
comp38753_c0_seq1 comp59227_c0_seq2
comp38753_c0_seq1 comp59328_c0_seq1
comp38753_c0_seq1 comp59650_c1_seq1
comp38852_c0_seq1 comp45869_c0_seq1
comp38852_c0_seq1 comp46974_c0_seq3
comp38852_c0_seq1 comp50913_c0_seq2
comp38852_c0_seq1 comp52730_c0_seq1
comp38852_c0_seq1 comp53533_c4_seq57
comp38852_c0_seq1 comp54288_c0_seq14
comp38852_c0_seq1 comp56152_c0_seq2
comp38852_c0_seq1 comp56554_c0_seq2
comp38852_c0_seq1 comp58308_c0_seq1
comp38852_c0_seq1 comp58792_c0_seq4
comp38852_c0_seq1 comp59034_c7_seq2
comp38852_c0_seq1 comp59291_c1_seq1
comp38852_c0_seq1 comp59306_c0_seq2
comp39033_c0_seq1 comp52124_c0_seq1
comp39033_c0_seq1 comp59395_c0_seq1
comp39079_c0_seq1 comp59748_c0_seq1
comp39139_c0_seq1 comp45811_c0_seq1
comp39139_c0_seq1 comp48997_c0_seq1
comp39139_c0_seq1 comp49609_c0_seq1
comp39139_c0_seq1 comp50943_c0_seq2
comp39278_c0_seq1 comp55658_c0_seq2
comp39278_c0_seq1 comp58794_c0_seq3
comp39278_c0_seq1 comp59328_c0_seq1
comp39361_c1_seq1 comp53959_c0_seq1
comp39361_c1_seq1 comp59045_c0_seq1
comp39407_c0_seq1 comp43019_c0_seq2
comp39407_c0_seq1 comp47798_c0_seq1
comp39407_c0_seq1 comp53058_c0_seq1
comp39407_c0_seq1 comp56809_c0_seq1
comp39407_c0_seq1 comp57518_c0_seq1
comp39407_c0_seq1 comp57864_c0_seq1
comp39407_c0_seq1 comp58151_c1_seq2
comp39407_c0_seq1 comp58345_c0_seq1
comp39407_c0_seq1 comp59219_c1_seq1
comp39498_c0_seq1 comp50486_c0_seq1
comp39629_c0_seq3 comp49495_c0_seq1
comp39629_c0_seq3 comp56202_c0_seq2
comp39629_c0_seq3 comp56532_c0_seq54
comp39683_c0_seq1 comp52124_c0_seq1
comp39892_c0_seq1 comp44577_c0_seq1
comp39892_c0_seq1 comp50178_c0_seq1
comp39892_c0_seq1 comp51990_c1_seq3
comp39892_c0_seq1 comp52208_c0_seq2
comp39892_c0_seq1 comp55030_c0_seq1
comp39892_c0_seq1 comp55263_c1_seq2
comp39892_c0_seq1 comp57552_c0_seq4
comp39892_c0_seq1 comp57909_c0_seq3
comp39892_c0_seq1 comp58554_c1_seq3
comp39986_c0_seq2 comp54580_c0_seq2
comp40081_c0_seq2 comp54352_c0_seq2
comp40409_c0_seq1 comp45811_c0_seq1
comp40409_c0_seq1 comp48997_c0_seq1
comp40409_c0_seq1 comp50943_c0_seq2
comp40426_c0_seq1 comp49846_c0_seq2
comp40426_c0_seq1 comp54912_c0_seq1
comp40426_c0_seq1 comp58244_c0_seq2
comp40426_c0_seq1 comp59658_c2_seq3
comp40576_c0_seq1 comp44330_c0_seq1
comp40576_c0_seq1 comp58624_c0_seq1
comp40576_c1_seq1 comp42040_c0_seq1
comp40576_c1_seq1 comp45191_c0_seq2
comp40576_c1_seq1 comp46934_c0_seq1
comp40576_c1_seq1 comp47257_c0_seq1
comp40576_c1_seq1 comp50305_c0_seq1
comp40576_c1_seq1 comp50574_c0_seq1
comp40576_c1_seq1 comp51342_c0_seq1
comp40576_c1_seq1 comp52956_c0_seq3
comp40576_c1_seq1 comp54270_c0_seq2
comp40576_c1_seq1 comp55882_c1_seq3
comp40576_c1_seq1 comp57189_c0_seq1
comp40576_c1_seq1 comp58299_c0_seq2
comp40576_c1_seq1 comp59489_c1_seq1
comp40576_c1_seq1 comp60842_c0_seq1
comp40633_c0_seq1 comp53960_c0_seq3
comp40633_c0_seq1 comp53995_c1_seq4
comp40633_c0_seq1 comp56493_c0_seq2
comp40633_c0_seq1 comp57144_c0_seq11
comp40633_c0_seq1 comp59680_c2_seq4
comp40633_c0_seq1 comp59715_c0_seq9
comp40644_c0_seq1 comp43851_c0_seq1
comp40644_c0_seq1 comp45811_c0_seq1
comp40644_c0_seq1 comp48997_c0_seq1
comp40644_c0_seq1 comp49609_c0_seq1
comp40644_c0_seq1 comp50943_c0_seq2
comp40644_c0_seq1 comp57017_c0_seq2
comp40665_c0_seq1 comp51526_c0_seq6
comp40739_c0_seq1 comp43153_c0_seq1
comp40739_c0_seq1 comp51755_c0_seq2
comp40739_c0_seq1 comp52958_c0_seq1
comp40739_c0_seq1 comp53058_c0_seq1
comp40739_c0_seq1 comp54717_c0_seq4
comp40739_c0_seq1 comp55370_c0_seq1
comp40739_c0_seq1 comp56291_c0_seq4
comp40739_c0_seq1 comp56951_c0_seq2
comp40739_c0_seq1 comp57518_c0_seq1
comp40739_c0_seq1 comp57864_c0_seq1
comp40739_c0_seq1 comp58049_c1_seq1
comp40739_c0_seq1 comp58151_c1_seq2
comp40739_c0_seq1 comp58345_c0_seq1
comp40739_c0_seq1 comp59219_c1_seq1
comp40739_c0_seq1 comp60158_c0_seq3
comp40739_c0_seq1 comp88928_c0_seq1
comp40752_c1_seq1 comp49609_c0_seq1
comp40784_c0_seq1 comp57158_c0_seq3
comp40810_c0_seq1 comp45392_c0_seq1
comp40810_c0_seq1 comp45811_c0_seq1
comp40810_c0_seq1 comp48997_c0_seq1
comp40810_c0_seq1 comp49548_c0_seq3
comp40810_c0_seq1 comp49609_c0_seq1
comp40810_c0_seq1 comp50943_c0_seq2
comp40810_c0_seq1 comp54580_c0_seq2
comp40810_c0_seq1 comp57017_c0_seq2
comp40810_c0_seq1 comp57847_c0_seq5
comp40810_c0_seq1 comp59027_c3_seq2
comp40844_c0_seq1 comp58824_c1_seq21
comp40933_c0_seq1 comp48423_c0_seq2
comp40952_c0_seq1 comp417_c0_seq1
comp40952_c0_seq1 comp46971_c0_seq2
comp40952_c0_seq1 comp51755_c0_seq2
comp40952_c0_seq1 comp55370_c0_seq1
comp40952_c0_seq1 comp88928_c0_seq1
comp40989_c0_seq1 comp59219_c1_seq1
comp41083_c0_seq1 comp52124_c0_seq1
comp41194_c0_seq1 comp54580_c0_seq2
comp41342_c0_seq1 comp47257_c0_seq1
comp41342_c0_seq1 comp48268_c0_seq2
comp41342_c0_seq1 comp51444_c0_seq1
comp41342_c0_seq1 comp52031_c0_seq2
comp41342_c0_seq1 comp59489_c1_seq1
comp41436_c0_seq1 comp56831_c0_seq4
comp41457_c1_seq2 comp48010_c0_seq1
comp41457_c1_seq2 comp48045_c0_seq1
comp41457_c1_seq2 comp58151_c1_seq2
comp41457_c1_seq2 comp58409_c0_seq6
comp41457_c1_seq2 comp63552_c0_seq1
comp41477_c0_seq1 comp56096_c0_seq3
comp41493_c0_seq1 comp54495_c0_seq1
comp41588_c0_seq1 comp58794_c0_seq3
comp41588_c0_seq1 comp59328_c0_seq1
comp41654_c0_seq1 comp44574_c0_seq1
comp41654_c0_seq1 comp46816_c0_seq1
comp41654_c0_seq1 comp47140_c0_seq1
comp41654_c0_seq1 comp48135_c0_seq1
comp41654_c0_seq1 comp51465_c0_seq1
comp41654_c0_seq1 comp51851_c0_seq2
comp41654_c0_seq1 comp54035_c0_seq3
comp41654_c0_seq1 comp56442_c0_seq4
comp41654_c0_seq1 comp56523_c0_seq29
comp41654_c0_seq1 comp56598_c0_seq9
comp41654_c0_seq1 comp56781_c0_seq35
comp417_c0_seq1 comp42811_c0_seq2
comp417_c0_seq1 comp43846_c0_seq2
comp417_c0_seq1 comp52437_c0_seq1
comp417_c0_seq1 comp54809_c0_seq1
comp417_c0_seq1 comp55654_c1_seq27
comp417_c0_seq1 comp57248_c0_seq1
comp417_c0_seq1 comp57483_c0_seq5
comp417_c0_seq1 comp57936_c0_seq1
comp417_c0_seq1 comp58073_c0_seq1
comp417_c0_seq1 comp58844_c0_seq16
comp417_c0_seq1 comp59038_c0_seq3
comp417_c0_seq1 comp59370_c0_seq1
comp417_c0_seq1 comp59742_c1_seq3
comp417_c0_seq1 comp59973_c0_seq6
comp41727_c0_seq1 comp43978_c0_seq1
comp41727_c0_seq1 comp55197_c0_seq1
comp41727_c0_seq1 comp57517_c0_seq4
comp41769_c0_seq1 comp54107_c0_seq2
comp41769_c0_seq1 comp59994_c0_seq8
comp41772_c0_seq1 comp53058_c0_seq1
comp41772_c0_seq1 comp54082_c0_seq1
comp41772_c0_seq1 comp55482_c0_seq2
comp41772_c0_seq1 comp57247_c0_seq13
comp41814_c0_seq1 comp54532_c0_seq5
comp41814_c0_seq1 comp58141_c1_seq1
comp41827_c0_seq1 comp56152_c0_seq2
comp41827_c0_seq1 comp56554_c0_seq2
comp41827_c0_seq1 comp56935_c0_seq5
comp41827_c0_seq1 comp59138_c0_seq2
comp41860_c0_seq1 comp54580_c0_seq2
comp41890_c0_seq1 comp52068_c0_seq3
comp41890_c0_seq1 comp54503_c0_seq1
comp41890_c0_seq1 comp57384_c0_seq4
comp41890_c0_seq1 comp57634_c2_seq2
comp41890_c0_seq1 comp58061_c0_seq7
comp41890_c0_seq1 comp59157_c1_seq1
comp41935_c0_seq1 comp54487_c0_seq1
comp41935_c0_seq1 comp54851_c2_seq26
comp42040_c0_seq1 comp45191_c0_seq2
comp42040_c0_seq1 comp46934_c0_seq1
comp42040_c0_seq1 comp47257_c0_seq1
comp42040_c0_seq1 comp52956_c0_seq3
comp42040_c0_seq1 comp53514_c0_seq2
comp42040_c0_seq1 comp59489_c1_seq1
comp42040_c0_seq1 comp60842_c0_seq1
comp42055_c0_seq1 comp44071_c0_seq1
comp42055_c0_seq1 comp44244_c0_seq1
comp42055_c0_seq1 comp44252_c0_seq1
comp42055_c0_seq1 comp46934_c0_seq1
comp42055_c0_seq1 comp47183_c0_seq1
comp42055_c0_seq1 comp47935_c0_seq1
comp42055_c0_seq1 comp48160_c0_seq1
comp42055_c0_seq1 comp48433_c0_seq1
comp42055_c0_seq1 comp49274_c0_seq1
comp42055_c0_seq1 comp49735_c0_seq1
comp42055_c0_seq1 comp49904_c0_seq1
comp42055_c0_seq1 comp50155_c0_seq3
comp42055_c0_seq1 comp50574_c0_seq1
comp42055_c0_seq1 comp50948_c0_seq1
comp42055_c0_seq1 comp51792_c0_seq2
comp42055_c0_seq1 comp52368_c0_seq11
comp42055_c0_seq1 comp52755_c2_seq1
comp42055_c0_seq1 comp52795_c0_seq2
comp42055_c0_seq1 comp53051_c0_seq5
comp42055_c0_seq1 comp53139_c0_seq1
comp42055_c0_seq1 comp53526_c1_seq3
comp42055_c0_seq1 comp54580_c0_seq2
comp42055_c0_seq1 comp55536_c0_seq1
comp42055_c0_seq1 comp56008_c4_seq1
comp42055_c0_seq1 comp56631_c0_seq24
comp42055_c0_seq1 comp58724_c0_seq2
comp42055_c0_seq1 comp59235_c1_seq10
comp42055_c0_seq1 comp60695_c0_seq1
comp42055_c0_seq1 comp60981_c0_seq1
comp42135_c0_seq1 comp43019_c0_seq2
comp42135_c0_seq1 comp47798_c0_seq1
comp42135_c0_seq1 comp56152_c0_seq2
comp42135_c0_seq1 comp56554_c0_seq2
comp42135_c0_seq1 comp56809_c0_seq1
comp42135_c0_seq1 comp59339_c0_seq11
comp42165_c0_seq1 comp43019_c0_seq2
comp42165_c0_seq1 comp44577_c0_seq1
comp42165_c0_seq1 comp47798_c0_seq1
comp42165_c0_seq1 comp50178_c0_seq1
comp42165_c0_seq1 comp56809_c0_seq1
comp42165_c0_seq1 comp57909_c0_seq3
comp42186_c0_seq1 comp46711_c0_seq3
comp42186_c0_seq1 comp48216_c0_seq1
comp42186_c0_seq1 comp54211_c1_seq1
comp42186_c0_seq1 comp54325_c0_seq1
comp42186_c0_seq1 comp54352_c0_seq2
comp42186_c0_seq1 comp54644_c0_seq1
comp42186_c0_seq1 comp55704_c1_seq4
comp42186_c0_seq1 comp56070_c0_seq14
comp42213_c0_seq1 comp43019_c0_seq2
comp42213_c0_seq1 comp47798_c0_seq1
comp42213_c0_seq1 comp51148_c0_seq2
comp42213_c0_seq1 comp53058_c0_seq1
comp42213_c0_seq1 comp56809_c0_seq1
comp42213_c0_seq1 comp57111_c1_seq1
comp42213_c0_seq1 comp57637_c0_seq3
comp42213_c0_seq1 comp58345_c0_seq1
comp42439_c0_seq1 comp42653_c0_seq1
comp42518_c0_seq1 comp44275_c0_seq1
comp42518_c0_seq1 comp54162_c0_seq1
comp42518_c0_seq1 comp58841_c0_seq6
comp42518_c0_seq1 comp59312_c0_seq2
comp42546_c0_seq1 comp42950_c0_seq1
comp42546_c0_seq1 comp43474_c0_seq1
comp42546_c0_seq1 comp45773_c0_seq2
comp42546_c0_seq1 comp46415_c0_seq1
comp42546_c0_seq1 comp48557_c0_seq1
comp42546_c0_seq1 comp50202_c0_seq2
comp42546_c0_seq1 comp52258_c0_seq2
comp42546_c0_seq1 comp53237_c0_seq2
comp42546_c0_seq1 comp54559_c0_seq2
comp42546_c0_seq1 comp56084_c0_seq2
comp42546_c0_seq1 comp58012_c0_seq19
comp42605_c0_seq1 comp54580_c0_seq2
comp42623_c0_seq1 comp43474_c0_seq1
comp42623_c0_seq1 comp46415_c0_seq1
comp42623_c0_seq1 comp48557_c0_seq1
comp42623_c0_seq1 comp52258_c0_seq2
comp42623_c0_seq1 comp53237_c0_seq2
comp42623_c0_seq1 comp54231_c0_seq11
comp42623_c0_seq1 comp54559_c0_seq2
comp42623_c0_seq1 comp54580_c0_seq2
comp42623_c0_seq1 comp56084_c0_seq2
comp42623_c0_seq1 comp57962_c0_seq3
comp42623_c0_seq1 comp58699_c2_seq13
comp42706_c0_seq1 comp43474_c0_seq1
comp42706_c0_seq1 comp44643_c0_seq1
comp42706_c0_seq1 comp46015_c0_seq1
comp42706_c0_seq1 comp46415_c0_seq1
comp42706_c0_seq1 comp48557_c0_seq1
comp42706_c0_seq1 comp49578_c0_seq1
comp42706_c0_seq1 comp52237_c0_seq1
comp42706_c0_seq1 comp52258_c0_seq2
comp42706_c0_seq1 comp52413_c0_seq3
comp42706_c0_seq1 comp52812_c0_seq2
comp42706_c0_seq1 comp53237_c0_seq2
comp42706_c0_seq1 comp54559_c0_seq2
comp42706_c0_seq1 comp54580_c0_seq2
comp42706_c0_seq1 comp54858_c0_seq2
comp42706_c0_seq1 comp56084_c0_seq2
comp42706_c0_seq1 comp56404_c3_seq10
comp42706_c0_seq1 comp57883_c0_seq6
comp42706_c0_seq1 comp58069_c0_seq22
comp42745_c0_seq1 comp46711_c0_seq3
comp42745_c0_seq1 comp48216_c0_seq1
comp42745_c0_seq1 comp54352_c0_seq2
comp42745_c0_seq1 comp54644_c0_seq1
comp42745_c0_seq1 comp55704_c1_seq4
comp42745_c0_seq1 comp56070_c0_seq14
comp42787_c0_seq2 comp44577_c0_seq1
comp42787_c0_seq2 comp50178_c0_seq1
comp42787_c0_seq2 comp54213_c1_seq1
comp42787_c0_seq2 comp55030_c0_seq1
comp42787_c0_seq2 comp55263_c1_seq2
comp42787_c0_seq2 comp56995_c0_seq2
comp42787_c0_seq2 comp57552_c0_seq4
comp42787_c0_seq2 comp57909_c0_seq3
comp42796_c0_seq1 comp56355_c0_seq1
comp42811_c0_seq2 comp46971_c0_seq2
comp42811_c0_seq2 comp51755_c0_seq2
comp42811_c0_seq2 comp55370_c0_seq1
comp42811_c0_seq2 comp59383_c0_seq11
comp42811_c0_seq2 comp59650_c1_seq1
comp42811_c0_seq2 comp88928_c0_seq1
comp42883_c0_seq2 comp43474_c0_seq1
comp42883_c0_seq2 comp45714_c0_seq1
comp42883_c0_seq2 comp46415_c0_seq1
comp42883_c0_seq2 comp48557_c0_seq1
comp42883_c0_seq2 comp52258_c0_seq2
comp42883_c0_seq2 comp52345_c0_seq1
comp42883_c0_seq2 comp53237_c0_seq2
comp42883_c0_seq2 comp53425_c0_seq1
comp42883_c0_seq2 comp54559_c0_seq2
comp42883_c0_seq2 comp55342_c0_seq5
comp42883_c0_seq2 comp55766_c0_seq9
comp42883_c0_seq2 comp56084_c0_seq2
comp42883_c0_seq2 comp57197_c0_seq4
comp42883_c0_seq2 comp57985_c0_seq2
comp42883_c0_seq2 comp58544_c0_seq1
comp42883_c0_seq2 comp59447_c0_seq33
comp42883_c0_seq2 comp59615_c0_seq91
comp42950_c0_seq1 comp45773_c0_seq2
comp42950_c0_seq1 comp50202_c0_seq2
comp42950_c0_seq1 comp56136_c0_seq2
comp42950_c0_seq1 comp56177_c0_seq3
comp42950_c0_seq1 comp56915_c0_seq10
comp42950_c0_seq1 comp58973_c6_seq12
comp42984_c0_seq1 comp44351_c0_seq1
comp42984_c0_seq1 comp45811_c0_seq1
comp42984_c0_seq1 comp48732_c0_seq1
comp42984_c0_seq1 comp48912_c0_seq2
comp42984_c0_seq1 comp48997_c0_seq1
comp42984_c0_seq1 comp50943_c0_seq2
comp42984_c0_seq1 comp52110_c0_seq1
comp42984_c0_seq1 comp53916_c0_seq1
comp42984_c0_seq1 comp54107_c0_seq2
comp42984_c0_seq1 comp56282_c0_seq2
comp42984_c0_seq1 comp59994_c0_seq8
comp43019_c0_seq2 comp44574_c0_seq1
comp43019_c0_seq2 comp44577_c0_seq1
comp43019_c0_seq2 comp45892_c0_seq1
comp43019_c0_seq2 comp47798_c0_seq1
comp43019_c0_seq2 comp47881_c0_seq1
comp43019_c0_seq2 comp47916_c0_seq1
comp43019_c0_seq2 comp48010_c0_seq1
comp43019_c0_seq2 comp48045_c0_seq1
comp43019_c0_seq2 comp48183_c0_seq1
comp43019_c0_seq2 comp49506_c0_seq1
comp43019_c0_seq2 comp49671_c0_seq2
comp43019_c0_seq2 comp50178_c0_seq1
comp43019_c0_seq2 comp50345_c0_seq1
comp43019_c0_seq2 comp50533_c0_seq5
comp43019_c0_seq2 comp50913_c0_seq2
comp43019_c0_seq2 comp51186_c0_seq2
comp43019_c0_seq2 comp51255_c1_seq1
comp43019_c0_seq2 comp51508_c0_seq1
comp43019_c0_seq2 comp52208_c0_seq2
comp43019_c0_seq2 comp52299_c1_seq2
comp43019_c0_seq2 comp52478_c0_seq3
comp43019_c0_seq2 comp52677_c0_seq2
comp43019_c0_seq2 comp53050_c0_seq1
comp43019_c0_seq2 comp53058_c0_seq1
comp43019_c0_seq2 comp53082_c0_seq1
comp43019_c0_seq2 comp53469_c0_seq6
comp43019_c0_seq2 comp53562_c0_seq1
comp43019_c0_seq2 comp53664_c0_seq2
comp43019_c0_seq2 comp54035_c0_seq3
comp43019_c0_seq2 comp54146_c1_seq2
comp43019_c0_seq2 comp54673_c0_seq2
comp43019_c0_seq2 comp54749_c0_seq3
comp43019_c0_seq2 comp54953_c0_seq1
comp43019_c0_seq2 comp55030_c0_seq1
comp43019_c0_seq2 comp55263_c1_seq2
comp43019_c0_seq2 comp55282_c0_seq1
comp43019_c0_seq2 comp55298_c0_seq6
comp43019_c0_seq2 comp55379_c0_seq4
comp43019_c0_seq2 comp55770_c0_seq3
comp43019_c0_seq2 comp55796_c1_seq1
comp43019_c0_seq2 comp55899_c0_seq3
comp43019_c0_seq2 comp56152_c0_seq2
comp43019_c0_seq2 comp56355_c0_seq1
comp43019_c0_seq2 comp56399_c0_seq10
comp43019_c0_seq2 comp56405_c0_seq3
comp43019_c0_seq2 comp56406_c0_seq5
comp43019_c0_seq2 comp56523_c0_seq29
comp43019_c0_seq2 comp56554_c0_seq2
comp43019_c0_seq2 comp56565_c0_seq2
comp43019_c0_seq2 comp56809_c0_seq1
comp43019_c0_seq2 comp56811_c0_seq12
comp43019_c0_seq2 comp56829_c0_seq2
comp43019_c0_seq2 comp56833_c0_seq2
comp43019_c0_seq2 comp56977_c3_seq1
comp43019_c0_seq2 comp57021_c0_seq3
comp43019_c0_seq2 comp57123_c0_seq5
comp43019_c0_seq2 comp57291_c0_seq2
comp43019_c0_seq2 comp57552_c0_seq4
comp43019_c0_seq2 comp57615_c0_seq3
comp43019_c0_seq2 comp57672_c0_seq1
comp43019_c0_seq2 comp57851_c0_seq33
comp43019_c0_seq2 comp57909_c0_seq3
comp43019_c0_seq2 comp58082_c1_seq3
comp43019_c0_seq2 comp58151_c1_seq2
comp43019_c0_seq2 comp58198_c0_seq2
comp43019_c0_seq2 comp58391_c0_seq4
comp43019_c0_seq2 comp58393_c0_seq7
comp43019_c0_seq2 comp58397_c0_seq1
comp43019_c0_seq2 comp58861_c0_seq3
comp43019_c0_seq2 comp59129_c0_seq1
comp43019_c0_seq2 comp59219_c1_seq1
comp43019_c0_seq2 comp59300_c0_seq20
comp43019_c0_seq2 comp59339_c0_seq11
comp43019_c0_seq2 comp59479_c0_seq9
comp43019_c0_seq2 comp59537_c0_seq35
comp43019_c0_seq2 comp59629_c0_seq6
comp43019_c0_seq2 comp59773_c2_seq13
comp43019_c0_seq2 comp59987_c1_seq1
comp43019_c0_seq2 comp60158_c0_seq3
comp43019_c0_seq2 comp63552_c0_seq1
comp43028_c0_seq1 comp62471_c0_seq1
comp43058_c0_seq1 comp58393_c0_seq7
comp43058_c0_seq1 comp59300_c0_seq20
comp43086_c0_seq1 comp51105_c0_seq2
comp43103_c0_seq2 comp58405_c0_seq9
comp43137_c0_seq1 comp44255_c0_seq1
comp43137_c0_seq1 comp49151_c0_seq1
comp43137_c0_seq1 comp50094_c0_seq1
comp43153_c0_seq1 comp46890_c0_seq1
comp43153_c0_seq1 comp48545_c0_seq1
comp43153_c0_seq1 comp48597_c0_seq2
comp43153_c0_seq1 comp50730_c0_seq3
comp43153_c0_seq1 comp53905_c0_seq3
comp43153_c0_seq1 comp54146_c1_seq2
comp43153_c0_seq1 comp55873_c3_seq1
comp43153_c0_seq1 comp56406_c0_seq5
comp43153_c0_seq1 comp56818_c1_seq2
comp43153_c0_seq1 comp58137_c1_seq39
comp43153_c0_seq1 comp58422_c0_seq31
comp43153_c0_seq1 comp58422_c1_seq2
comp43153_c0_seq1 comp59625_c0_seq6
comp43153_c0_seq1 comp59629_c0_seq6
comp43346_c0_seq1 comp54467_c0_seq2
comp43346_c0_seq1 comp58393_c0_seq7
comp43346_c0_seq1 comp59138_c0_seq2
comp43346_c0_seq1 comp59300_c0_seq20
comp43357_c0_seq1 comp55846_c0_seq5
comp43357_c0_seq1 comp59083_c1_seq1
comp43357_c0_seq1 comp60165_c0_seq5
comp43474_c0_seq1 comp43808_c0_seq1
comp43474_c0_seq1 comp44095_c0_seq1
comp43474_c0_seq1 comp44574_c0_seq1
comp43474_c0_seq1 comp44577_c0_seq1
comp43474_c0_seq1 comp45001_c0_seq1
comp43474_c0_seq1 comp45215_c0_seq1
comp43474_c0_seq1 comp45711_c0_seq1
comp43474_c0_seq1 comp46415_c0_seq1
comp43474_c0_seq1 comp46549_c0_seq1
comp43474_c0_seq1 comp46570_c0_seq1
comp43474_c0_seq1 comp47308_c0_seq2
comp43474_c0_seq1 comp47475_c0_seq3
comp43474_c0_seq1 comp47649_c0_seq1
comp43474_c0_seq1 comp47997_c0_seq3
comp43474_c0_seq1 comp48076_c0_seq2
comp43474_c0_seq1 comp48112_c0_seq4
comp43474_c0_seq1 comp48557_c0_seq1
comp43474_c0_seq1 comp48597_c0_seq2
comp43474_c0_seq1 comp48812_c0_seq1
comp43474_c0_seq1 comp48839_c0_seq1
comp43474_c0_seq1 comp49105_c0_seq1
comp43474_c0_seq1 comp49179_c0_seq1
comp43474_c0_seq1 comp49353_c0_seq2
comp43474_c0_seq1 comp49406_c1_seq1
comp43474_c0_seq1 comp49497_c0_seq5
comp43474_c0_seq1 comp49825_c0_seq1
comp43474_c0_seq1 comp49846_c0_seq2
comp43474_c0_seq1 comp50161_c0_seq1
comp43474_c0_seq1 comp50172_c2_seq1
comp43474_c0_seq1 comp50178_c0_seq1
comp43474_c0_seq1 comp50598_c0_seq1
comp43474_c0_seq1 comp50917_c0_seq1
comp43474_c0_seq1 comp50963_c0_seq1
comp43474_c0_seq1 comp51291_c0_seq1
comp43474_c0_seq1 comp51426_c0_seq9
comp43474_c0_seq1 comp51582_c0_seq1
comp43474_c0_seq1 comp51761_c0_seq1
comp43474_c0_seq1 comp51827_c0_seq1
comp43474_c0_seq1 comp51869_c0_seq1
comp43474_c0_seq1 comp52258_c0_seq2
comp43474_c0_seq1 comp52273_c0_seq2
comp43474_c0_seq1 comp52403_c0_seq2
comp43474_c0_seq1 comp52414_c0_seq1
comp43474_c0_seq1 comp52474_c0_seq3
comp43474_c0_seq1 comp52478_c0_seq3
comp43474_c0_seq1 comp52540_c1_seq2
comp43474_c0_seq1 comp52588_c0_seq1
comp43474_c0_seq1 comp52700_c1_seq3
comp43474_c0_seq1 comp52714_c0_seq1
comp43474_c0_seq1 comp52745_c0_seq1
comp43474_c0_seq1 comp52755_c2_seq1
comp43474_c0_seq1 comp52955_c0_seq2
comp43474_c0_seq1 comp53237_c0_seq2
comp43474_c0_seq1 comp53335_c0_seq5
comp43474_c0_seq1 comp53353_c0_seq2
comp43474_c0_seq1 comp53452_c0_seq2
comp43474_c0_seq1 comp53870_c0_seq5
comp43474_c0_seq1 comp53944_c0_seq2
comp43474_c0_seq1 comp54003_c0_seq1
comp43474_c0_seq1 comp54035_c0_seq3
comp43474_c0_seq1 comp54149_c0_seq1
comp43474_c0_seq1 comp54217_c0_seq2
comp43474_c0_seq1 comp54424_c0_seq2
comp43474_c0_seq1 comp54477_c0_seq3
comp43474_c0_seq1 comp54559_c0_seq2
comp43474_c0_seq1 comp54771_c0_seq1
comp43474_c0_seq1 comp54813_c0_seq1
comp43474_c0_seq1 comp54877_c0_seq2
comp43474_c0_seq1 comp55030_c0_seq1
comp43474_c0_seq1 comp55225_c0_seq2
comp43474_c0_seq1 comp55231_c0_seq2
comp43474_c0_seq1 comp55237_c0_seq1
comp43474_c0_seq1 comp55263_c1_seq2
comp43474_c0_seq1 comp55318_c0_seq2
comp43474_c0_seq1 comp55541_c0_seq2
comp43474_c0_seq1 comp55602_c0_seq2
comp43474_c0_seq1 comp55700_c0_seq1
comp43474_c0_seq1 comp55732_c0_seq5
comp43474_c0_seq1 comp55764_c0_seq2
comp43474_c0_seq1 comp55820_c0_seq1
comp43474_c0_seq1 comp56084_c0_seq2
comp43474_c0_seq1 comp56158_c0_seq1
comp43474_c0_seq1 comp56287_c1_seq2
comp43474_c0_seq1 comp56372_c0_seq2
comp43474_c0_seq1 comp56380_c1_seq24
comp43474_c0_seq1 comp56427_c1_seq1
comp43474_c0_seq1 comp56489_c0_seq14
comp43474_c0_seq1 comp56536_c0_seq1
comp43474_c0_seq1 comp56620_c2_seq4
comp43474_c0_seq1 comp56688_c0_seq4
comp43474_c0_seq1 comp56739_c0_seq3
comp43474_c0_seq1 comp56759_c0_seq4
comp43474_c0_seq1 comp56762_c3_seq1
comp43474_c0_seq1 comp56794_c0_seq1
comp43474_c0_seq1 comp56798_c0_seq6
comp43474_c0_seq1 comp56861_c0_seq2
comp43474_c0_seq1 comp56916_c0_seq1
comp43474_c0_seq1 comp56930_c0_seq3
comp43474_c0_seq1 comp57017_c0_seq2
comp43474_c0_seq1 comp57069_c0_seq3
comp43474_c0_seq1 comp57097_c1_seq1
comp43474_c0_seq1 comp57109_c0_seq1
comp43474_c0_seq1 comp57149_c0_seq4
comp43474_c0_seq1 comp57210_c0_seq2
comp43474_c0_seq1 comp57226_c1_seq1
comp43474_c0_seq1 comp57227_c0_seq4
comp43474_c0_seq1 comp57237_c0_seq80
comp43474_c0_seq1 comp57239_c1_seq1
comp43474_c0_seq1 comp57292_c1_seq2
comp43474_c0_seq1 comp57434_c1_seq25
comp43474_c0_seq1 comp57540_c0_seq3
comp43474_c0_seq1 comp57552_c0_seq4
comp43474_c0_seq1 comp57609_c0_seq1
comp43474_c0_seq1 comp57612_c0_seq2
comp43474_c0_seq1 comp57627_c1_seq6
comp43474_c0_seq1 comp57649_c0_seq12
comp43474_c0_seq1 comp57664_c1_seq5
comp43474_c0_seq1 comp57683_c1_seq15
comp43474_c0_seq1 comp57747_c0_seq14
comp43474_c0_seq1 comp57829_c0_seq1
comp43474_c0_seq1 comp57861_c0_seq1
comp43474_c0_seq1 comp57876_c0_seq3
comp43474_c0_seq1 comp57909_c0_seq3
comp43474_c0_seq1 comp57910_c0_seq11
comp43474_c0_seq1 comp57972_c0_seq1
comp43474_c0_seq1 comp58194_c0_seq13
comp43474_c0_seq1 comp58387_c2_seq2
comp43474_c0_seq1 comp58396_c0_seq2
comp43474_c0_seq1 comp58604_c0_seq1
comp43474_c0_seq1 comp58623_c0_seq4
comp43474_c0_seq1 comp58719_c0_seq2
comp43474_c0_seq1 comp58819_c0_seq2
comp43474_c0_seq1 comp58992_c0_seq4
comp43474_c0_seq1 comp59014_c0_seq3
comp43474_c0_seq1 comp59027_c3_seq2
comp43474_c0_seq1 comp59120_c0_seq2
comp43474_c0_seq1 comp59167_c0_seq5
comp43474_c0_seq1 comp59185_c0_seq3
comp43474_c0_seq1 comp59253_c2_seq41
comp43474_c0_seq1 comp59262_c0_seq1
comp43474_c0_seq1 comp59381_c0_seq50
comp43474_c0_seq1 comp59386_c0_seq19
comp43474_c0_seq1 comp59399_c0_seq20
comp43474_c0_seq1 comp59439_c0_seq3
comp43474_c0_seq1 comp59548_c0_seq8
comp43474_c0_seq1 comp59562_c0_seq32
comp43474_c0_seq1 comp59572_c0_seq3
comp43474_c0_seq1 comp59583_c0_seq2
comp43474_c0_seq1 comp59601_c0_seq5
comp43474_c0_seq1 comp59647_c0_seq6
comp43474_c0_seq1 comp59748_c0_seq1
comp43474_c0_seq1 comp59757_c1_seq5
comp43474_c0_seq1 comp59786_c0_seq2
comp43474_c0_seq1 comp59815_c0_seq3
comp43474_c0_seq1 comp59822_c0_seq6
comp43474_c0_seq1 comp59868_c0_seq3
comp43474_c0_seq1 comp59875_c1_seq8
comp43474_c0_seq1 comp59942_c0_seq2
comp43474_c0_seq1 comp59986_c0_seq1
comp43474_c0_seq1 comp59987_c0_seq2
comp43474_c0_seq1 comp60007_c0_seq12
comp43474_c0_seq1 comp60080_c1_seq1
comp43474_c0_seq1 comp60091_c0_seq2
comp43474_c0_seq1 comp61454_c0_seq1
comp43474_c0_seq1 comp97705_c0_seq1
comp43675_c0_seq1 comp44574_c0_seq1
comp43675_c0_seq1 comp46816_c0_seq1
comp43675_c0_seq1 comp47140_c0_seq1
comp43675_c0_seq1 comp48135_c0_seq1
comp43675_c0_seq1 comp51465_c0_seq1
comp43675_c0_seq1 comp51851_c0_seq2
comp43675_c0_seq1 comp54035_c0_seq3
comp43675_c0_seq1 comp56442_c0_seq4
comp43675_c0_seq1 comp56523_c0_seq29
comp43675_c0_seq1 comp56598_c0_seq9
comp43675_c0_seq1 comp56781_c0_seq35
comp43710_c0_seq2 comp57426_c1_seq2
comp43710_c0_seq2 comp59395_c0_seq1
comp43783_c0_seq1 comp54580_c0_seq2
comp43799_c0_seq1 comp53759_c0_seq1
comp43799_c0_seq1 comp54580_c0_seq2
comp43808_c0_seq1 comp46415_c0_seq1
comp43808_c0_seq1 comp48557_c0_seq1
comp43808_c0_seq1 comp51078_c0_seq1
comp43808_c0_seq1 comp52258_c0_seq2
comp43808_c0_seq1 comp53237_c0_seq2
comp43808_c0_seq1 comp54559_c0_seq2
comp43808_c0_seq1 comp56084_c0_seq2
comp43808_c0_seq1 comp59362_c0_seq1
comp43812_c0_seq1 comp59545_c2_seq3
comp43813_c0_seq1 comp43946_c0_seq1
comp43813_c0_seq1 comp46993_c0_seq1
comp43813_c0_seq1 comp50168_c0_seq1
comp43813_c0_seq1 comp54166_c0_seq4
comp43813_c0_seq1 comp54547_c0_seq1
comp43813_c0_seq1 comp54625_c0_seq3
comp43813_c0_seq1 comp55106_c1_seq1
comp43813_c0_seq1 comp56139_c0_seq1
comp43813_c0_seq1 comp64729_c0_seq1
comp43814_c0_seq2 comp59994_c0_seq8
comp43820_c0_seq1 comp45198_c0_seq1
comp43820_c0_seq1 comp54456_c0_seq5
comp43821_c0_seq1 comp49609_c0_seq1
comp43831_c0_seq1 comp54580_c0_seq2
comp43837_c0_seq2 comp44577_c0_seq1
comp43837_c0_seq2 comp50178_c0_seq1
comp43837_c0_seq2 comp54580_c0_seq2
comp43837_c0_seq2 comp55030_c0_seq1
comp43837_c0_seq2 comp55263_c1_seq2
comp43837_c0_seq2 comp57552_c0_seq4
comp43837_c0_seq2 comp57909_c0_seq3
comp43838_c0_seq1 comp46345_c0_seq1
comp43838_c0_seq1 comp48021_c0_seq1
comp43838_c0_seq1 comp56977_c2_seq2
comp43841_c0_seq2 comp43884_c0_seq1
comp43841_c0_seq2 comp52075_c0_seq1
comp43841_c0_seq2 comp52619_c0_seq1
comp43841_c0_seq2 comp56463_c0_seq3
comp43841_c0_seq2 comp58794_c0_seq3
comp43841_c0_seq2 comp58859_c0_seq17
comp43841_c0_seq2 comp59328_c0_seq1
comp43841_c0_seq2 comp59650_c1_seq1
comp43843_c0_seq1 comp54348_c0_seq2
comp43843_c0_seq1 comp57045_c0_seq4
comp43846_c0_seq2 comp46971_c0_seq2
comp43846_c0_seq2 comp51755_c0_seq2
comp43846_c0_seq2 comp54580_c0_seq2
comp43846_c0_seq2 comp55370_c0_seq1
comp43846_c0_seq2 comp88928_c0_seq1
comp43851_c0_seq1 comp44379_c0_seq1
comp43851_c0_seq1 comp45811_c0_seq1
comp43851_c0_seq1 comp48997_c0_seq1
comp43851_c0_seq1 comp50315_c0_seq3
comp43851_c0_seq1 comp50943_c0_seq2
comp43851_c0_seq1 comp55652_c0_seq5
comp43851_c0_seq1 comp56083_c0_seq2
comp43851_c0_seq1 comp56291_c0_seq4
comp43851_c0_seq1 comp59994_c0_seq8
comp43851_c0_seq1 comp60050_c0_seq6
comp43884_c0_seq1 comp53300_c2_seq1
comp43884_c0_seq1 comp58666_c1_seq17
comp43905_c0_seq4 comp44574_c0_seq1
comp43905_c0_seq4 comp54035_c0_seq3
comp43946_c0_seq1 comp50218_c0_seq1
comp43946_c0_seq1 comp59862_c0_seq7
comp43992_c0_seq1 comp44153_c0_seq3
comp44015_c0_seq1 comp49410_c1_seq1
comp44015_c0_seq1 comp49755_c0_seq3
comp44015_c0_seq1 comp52513_c0_seq1
comp44022_c0_seq1 comp62471_c0_seq1
comp44054_c0_seq1 comp59142_c0_seq3
comp44071_c0_seq1 comp50155_c0_seq3
comp44071_c0_seq1 comp50948_c0_seq1
comp44071_c0_seq1 comp52795_c0_seq2
comp44071_c0_seq1 comp60981_c0_seq1
comp44085_c0_seq1 comp56248_c0_seq5
comp44085_c0_seq1 comp56334_c0_seq1
comp44085_c0_seq1 comp56743_c1_seq5
comp44085_c0_seq1 comp57852_c0_seq1
comp44085_c0_seq1 comp58993_c1_seq4
comp44094_c0_seq1 comp44577_c0_seq1
comp44094_c0_seq1 comp50178_c0_seq1
comp44094_c0_seq1 comp56152_c0_seq2
comp44094_c0_seq1 comp56554_c0_seq2
comp44094_c0_seq1 comp57909_c0_seq3
comp44095_c0_seq1 comp46415_c0_seq1
comp44095_c0_seq1 comp48557_c0_seq1
comp44095_c0_seq1 comp52208_c0_seq2
comp44095_c0_seq1 comp52258_c0_seq2
comp44095_c0_seq1 comp53237_c0_seq2
comp44095_c0_seq1 comp54559_c0_seq2
comp44095_c0_seq1 comp56084_c0_seq2
comp44114_c0_seq1 comp44344_c0_seq1
comp44114_c0_seq1 comp50383_c0_seq2
comp44116_c0_seq1 comp44577_c0_seq1
comp44116_c0_seq1 comp47140_c0_seq1
comp44116_c0_seq1 comp50178_c0_seq1
comp44116_c0_seq1 comp50548_c0_seq1
comp44116_c0_seq1 comp51313_c0_seq1
comp44116_c0_seq1 comp52068_c0_seq3
comp44116_c0_seq1 comp52075_c0_seq1
comp44116_c0_seq1 comp52345_c0_seq1
comp44116_c0_seq1 comp53425_c0_seq1
comp44116_c0_seq1 comp54580_c0_seq2
comp44116_c0_seq1 comp55030_c0_seq1
comp44116_c0_seq1 comp55263_c1_seq2
comp44116_c0_seq1 comp55766_c0_seq9
comp44116_c0_seq1 comp56526_c1_seq5
comp44116_c0_seq1 comp57552_c0_seq4
comp44116_c0_seq1 comp57909_c0_seq3
comp44116_c0_seq1 comp58794_c0_seq3
comp44116_c0_seq1 comp58859_c0_seq17
comp44116_c0_seq1 comp59227_c0_seq2
comp44116_c0_seq1 comp59328_c0_seq1
comp44116_c0_seq1 comp59650_c1_seq1
comp44118_c0_seq2 comp52619_c0_seq1
comp44118_c0_seq2 comp54472_c1_seq3
comp44118_c0_seq2 comp54651_c0_seq6
comp44118_c0_seq2 comp56589_c0_seq1
comp44118_c0_seq2 comp57123_c0_seq5
comp44118_c0_seq2 comp57988_c2_seq2
comp44118_c0_seq2 comp58666_c1_seq17
comp44118_c0_seq2 comp59542_c3_seq2
comp44118_c0_seq2 comp59966_c0_seq1
comp4412_c0_seq1 comp58522_c1_seq5
comp4412_c0_seq1 comp59811_c1_seq2
comp44123_c0_seq1 comp52729_c0_seq3
comp44123_c0_seq1 comp54007_c1_seq1
comp44123_c0_seq1 comp54503_c0_seq1
comp44123_c0_seq1 comp57384_c0_seq4
comp44123_c0_seq1 comp57634_c2_seq2
comp44123_c0_seq1 comp58061_c0_seq7
comp44123_c0_seq1 comp58255_c3_seq6
comp44123_c0_seq1 comp58794_c0_seq3
comp44123_c0_seq1 comp59157_c1_seq1
comp44123_c0_seq1 comp59328_c0_seq1
comp44153_c0_seq3 comp48331_c0_seq1
comp44153_c0_seq3 comp49373_c0_seq1
comp44153_c0_seq3 comp52124_c0_seq1
comp44153_c0_seq3 comp52562_c0_seq2
comp44153_c0_seq3 comp58393_c0_seq7
comp44153_c0_seq3 comp59300_c0_seq20
comp44153_c0_seq3 comp60161_c0_seq1
comp44153_c0_seq3 comp60533_c0_seq1
comp44153_c0_seq3 comp60537_c0_seq1
comp44161_c0_seq1 comp55318_c0_seq2
comp44164_c0_seq1 comp52221_c0_seq1
comp44200_c0_seq1 comp47257_c0_seq1
comp44200_c0_seq1 comp48268_c0_seq2
comp44200_c0_seq1 comp51444_c0_seq1
comp44200_c0_seq1 comp52031_c0_seq2
comp44200_c0_seq1 comp59489_c1_seq1
comp44213_c0_seq1 comp54580_c0_seq2
comp44216_c0_seq1 comp48223_c0_seq3
comp44225_c0_seq2 comp46711_c0_seq3
comp44225_c0_seq2 comp47010_c0_seq1
comp44225_c0_seq2 comp48216_c0_seq1
comp44225_c0_seq2 comp54211_c1_seq1
comp44225_c0_seq2 comp54325_c0_seq1
comp44225_c0_seq2 comp54644_c0_seq1
comp44225_c0_seq2 comp56070_c0_seq14
comp44225_c0_seq2 comp57123_c0_seq5
comp44226_c0_seq1 comp45168_c0_seq2
comp44226_c0_seq1 comp46732_c0_seq1
comp44242_c0_seq1 comp48780_c0_seq2
comp44244_c0_seq1 comp44252_c0_seq1
comp44244_c0_seq1 comp46934_c0_seq1
comp44244_c0_seq1 comp47183_c0_seq1
comp44244_c0_seq1 comp48160_c0_seq1
comp44244_c0_seq1 comp48433_c0_seq1
comp44244_c0_seq1 comp49274_c0_seq1
comp44244_c0_seq1 comp49735_c0_seq1
comp44244_c0_seq1 comp49904_c0_seq1
comp44244_c0_seq1 comp50155_c0_seq3
comp44244_c0_seq1 comp50255_c0_seq1
comp44244_c0_seq1 comp50948_c0_seq1
comp44244_c0_seq1 comp51792_c0_seq2
comp44244_c0_seq1 comp52368_c0_seq11
comp44244_c0_seq1 comp52795_c0_seq2
comp44244_c0_seq1 comp53051_c0_seq5
comp44244_c0_seq1 comp53526_c1_seq3
comp44244_c0_seq1 comp54580_c0_seq2
comp44244_c0_seq1 comp55536_c0_seq1
comp44244_c0_seq1 comp56008_c4_seq1
comp44244_c0_seq1 comp56631_c0_seq24
comp44244_c0_seq1 comp58724_c0_seq2
comp44244_c0_seq1 comp60981_c0_seq1
comp44252_c0_seq1 comp47183_c0_seq1
comp44252_c0_seq1 comp48160_c0_seq1
comp44252_c0_seq1 comp49274_c0_seq1
comp44252_c0_seq1 comp49735_c0_seq1
comp44252_c0_seq1 comp49904_c0_seq1
comp44252_c0_seq1 comp50155_c0_seq3
comp44252_c0_seq1 comp50948_c0_seq1
comp44252_c0_seq1 comp51792_c0_seq2
comp44252_c0_seq1 comp52368_c0_seq11
comp44252_c0_seq1 comp53051_c0_seq5
comp44252_c0_seq1 comp55536_c0_seq1
comp44252_c0_seq1 comp56008_c4_seq1
comp44252_c0_seq1 comp56631_c0_seq24
comp44252_c0_seq1 comp60981_c0_seq1
comp44255_c0_seq1 comp49151_c0_seq1
comp44255_c0_seq1 comp50094_c0_seq1
comp44256_c0_seq1 comp54107_c0_seq2
comp44258_c0_seq1 comp46974_c0_seq3
comp44260_c0_seq1 comp49761_c0_seq1
comp44260_c0_seq1 comp50421_c0_seq1
comp44260_c0_seq1 comp51658_c0_seq1
comp44260_c0_seq1 comp52358_c0_seq3
comp44260_c0_seq1 comp53988_c0_seq2
comp44260_c0_seq1 comp54172_c1_seq4
comp44260_c0_seq1 comp54679_c0_seq1
comp44260_c0_seq1 comp55138_c0_seq1
comp44260_c0_seq1 comp56180_c0_seq1
comp44260_c0_seq1 comp59031_c0_seq28
comp44260_c0_seq1 comp59309_c1_seq3
comp44275_c0_seq1 comp44341_c0_seq1
comp44275_c0_seq1 comp46005_c0_seq1
comp44275_c0_seq1 comp56727_c0_seq1
comp44275_c0_seq1 comp56911_c1_seq1
comp44275_c0_seq1 comp58402_c1_seq1
comp44275_c0_seq1 comp59807_c0_seq1
comp44275_c0_seq1 comp96305_c0_seq1
comp44278_c0_seq1 comp48223_c0_seq3
comp44278_c0_seq1 comp54580_c0_seq2
comp44278_c0_seq1 comp56523_c0_seq29
comp44278_c0_seq1 comp56598_c0_seq9
comp44296_c0_seq3 comp56000_c0_seq1
comp44296_c0_seq3 comp57218_c2_seq4
comp44296_c0_seq3 comp58189_c0_seq2
comp44316_c0_seq1 comp56011_c0_seq12
comp44316_c0_seq1 comp56132_c0_seq4
comp44328_c0_seq1 comp47075_c0_seq1
comp44328_c0_seq1 comp51664_c0_seq1
comp44330_c0_seq1 comp56891_c1_seq1
comp44330_c0_seq1 comp58624_c0_seq1
comp44338_c0_seq2 comp59138_c0_seq2
comp44341_c0_seq1 comp51148_c0_seq2
comp44341_c0_seq1 comp52413_c0_seq3
comp44341_c0_seq1 comp54162_c0_seq1
comp44341_c0_seq1 comp54858_c0_seq2
comp44341_c0_seq1 comp56404_c3_seq10
comp44341_c0_seq1 comp57111_c1_seq1
comp44341_c0_seq1 comp57637_c0_seq3
comp44341_c0_seq1 comp57883_c0_seq6
comp44341_c0_seq1 comp58069_c0_seq22
comp44341_c0_seq1 comp58402_c1_seq1
comp44341_c0_seq1 comp59242_c1_seq4
comp44341_c0_seq1 comp96305_c0_seq1
comp44344_c0_seq1 comp49601_c0_seq1
comp44344_c0_seq1 comp53960_c0_seq3
comp44344_c0_seq1 comp59680_c2_seq4
comp44344_c0_seq1 comp59715_c0_seq9
comp44351_c0_seq1 comp44379_c0_seq1
comp44351_c0_seq1 comp45811_c0_seq1
comp44351_c0_seq1 comp48997_c0_seq1
comp44351_c0_seq1 comp50038_c0_seq2
comp44351_c0_seq1 comp50943_c0_seq2
comp44351_c0_seq1 comp51526_c0_seq6
comp44351_c0_seq1 comp52110_c0_seq1
comp44351_c0_seq1 comp53916_c0_seq1
comp44351_c0_seq1 comp55630_c0_seq1
comp44351_c0_seq1 comp56282_c0_seq2
comp44351_c0_seq1 comp58157_c0_seq2
comp44351_c0_seq1 comp59994_c0_seq8
comp44364_c0_seq1 comp46147_c0_seq1
comp44364_c0_seq1 comp49193_c0_seq2
comp44379_c0_seq1 comp48732_c0_seq1
comp44379_c0_seq1 comp52110_c0_seq1
comp44379_c0_seq1 comp53916_c0_seq1
comp44379_c0_seq1 comp54107_c0_seq2
comp44379_c0_seq1 comp56282_c0_seq2
comp44379_c0_seq1 comp59994_c0_seq8
comp44420_c0_seq1 comp53960_c0_seq3
comp44420_c0_seq1 comp59680_c2_seq4
comp44420_c0_seq1 comp59715_c0_seq9
comp44435_c0_seq1 comp59994_c0_seq8
comp44492_c0_seq2 comp60022_c2_seq1
comp44493_c0_seq1 comp52729_c0_seq3
comp44493_c0_seq1 comp54503_c0_seq1
comp44493_c0_seq1 comp57384_c0_seq4
comp44493_c0_seq1 comp57634_c2_seq2
comp44493_c0_seq1 comp58061_c0_seq7
comp44493_c0_seq1 comp58255_c3_seq6
comp44493_c0_seq1 comp58794_c0_seq3
comp44493_c0_seq1 comp59157_c1_seq1
comp44493_c0_seq1 comp59328_c0_seq1
comp44558_c1_seq3 comp54580_c0_seq2
comp44558_c1_seq3 comp59027_c3_seq2
comp44574_c0_seq1 comp46415_c0_seq1
comp44574_c0_seq1 comp47593_c0_seq1
comp44574_c0_seq1 comp47798_c0_seq1
comp44574_c0_seq1 comp47916_c0_seq1
comp44574_c0_seq1 comp48010_c0_seq1
comp44574_c0_seq1 comp48052_c0_seq4
comp44574_c0_seq1 comp48557_c0_seq1
comp44574_c0_seq1 comp49428_c0_seq2
comp44574_c0_seq1 comp49995_c0_seq2
comp44574_c0_seq1 comp50021_c0_seq1
comp44574_c0_seq1 comp51250_c0_seq1
comp44574_c0_seq1 comp52258_c0_seq2
comp44574_c0_seq1 comp52977_c0_seq2
comp44574_c0_seq1 comp53050_c0_seq1
comp44574_c0_seq1 comp53237_c0_seq2
comp44574_c0_seq1 comp53240_c0_seq2
comp44574_c0_seq1 comp53474_c0_seq4
comp44574_c0_seq1 comp53562_c0_seq1
comp44574_c0_seq1 comp53664_c0_seq2
comp44574_c0_seq1 comp54559_c0_seq2
comp44574_c0_seq1 comp55796_c1_seq1
comp44574_c0_seq1 comp55884_c0_seq14
comp44574_c0_seq1 comp56027_c0_seq4
comp44574_c0_seq1 comp56084_c0_seq2
comp44574_c0_seq1 comp56152_c0_seq2
comp44574_c0_seq1 comp56154_c0_seq3
comp44574_c0_seq1 comp56230_c0_seq2
comp44574_c0_seq1 comp56554_c0_seq2
comp44574_c0_seq1 comp56565_c0_seq2
comp44574_c0_seq1 comp56809_c0_seq1
comp44574_c0_seq1 comp57029_c0_seq2
comp44574_c0_seq1 comp57123_c0_seq5
comp44574_c0_seq1 comp57615_c0_seq3
comp44574_c0_seq1 comp57912_c2_seq2
comp44574_c0_seq1 comp58151_c1_seq2
comp44574_c0_seq1 comp58354_c0_seq3
comp44574_c0_seq1 comp58391_c0_seq4
comp44574_c0_seq1 comp58397_c0_seq1
comp44574_c0_seq1 comp59001_c0_seq5
comp44574_c0_seq1 comp59129_c0_seq1
comp44574_c0_seq1 comp59339_c0_seq11
comp44574_c0_seq1 comp59376_c0_seq20
comp44574_c0_seq1 comp59555_c2_seq4
comp44574_c0_seq1 comp59636_c0_seq3
comp44574_c0_seq1 comp59649_c0_seq28
comp44574_c0_seq1 comp60135_c0_seq6
comp44577_c0_seq1 comp44643_c0_seq1
comp44577_c0_seq1 comp44731_c0_seq1
comp44577_c0_seq1 comp45570_c0_seq2
comp44577_c0_seq1 comp46015_c0_seq1
comp44577_c0_seq1 comp46415_c0_seq1
comp44577_c0_seq1 comp46459_c0_seq1
comp44577_c0_seq1 comp46967_c0_seq1
comp44577_c0_seq1 comp47798_c0_seq1
comp44577_c0_seq1 comp47916_c0_seq1
comp44577_c0_seq1 comp47979_c0_seq2
comp44577_c0_seq1 comp48010_c0_seq1
comp44577_c0_seq1 comp48045_c0_seq1
comp44577_c0_seq1 comp48052_c0_seq4
comp44577_c0_seq1 comp48557_c0_seq1
comp44577_c0_seq1 comp49146_c0_seq1
comp44577_c0_seq1 comp49265_c0_seq3
comp44577_c0_seq1 comp49470_c1_seq2
comp44577_c0_seq1 comp49578_c0_seq1
comp44577_c0_seq1 comp49848_c0_seq1
comp44577_c0_seq1 comp49995_c0_seq2
comp44577_c0_seq1 comp50021_c0_seq1
comp44577_c0_seq1 comp50110_c0_seq1
comp44577_c0_seq1 comp50610_c0_seq6
comp44577_c0_seq1 comp50906_c0_seq3
comp44577_c0_seq1 comp51070_c0_seq1
comp44577_c0_seq1 comp51250_c0_seq1
comp44577_c0_seq1 comp51432_c0_seq2
comp44577_c0_seq1 comp51576_c0_seq10
comp44577_c0_seq1 comp51690_c0_seq1
comp44577_c0_seq1 comp51990_c1_seq3
comp44577_c0_seq1 comp52143_c0_seq1
comp44577_c0_seq1 comp52258_c0_seq2
comp44577_c0_seq1 comp52478_c0_seq3
comp44577_c0_seq1 comp52677_c0_seq2
comp44577_c0_seq1 comp52812_c0_seq2
comp44577_c0_seq1 comp53220_c1_seq6
comp44577_c0_seq1 comp53237_c0_seq2
comp44577_c0_seq1 comp53240_c0_seq2
comp44577_c0_seq1 comp53597_c0_seq1
comp44577_c0_seq1 comp53664_c0_seq2
comp44577_c0_seq1 comp53885_c1_seq2
comp44577_c0_seq1 comp53930_c1_seq1
comp44577_c0_seq1 comp54327_c0_seq1
comp44577_c0_seq1 comp54480_c0_seq1
comp44577_c0_seq1 comp54559_c0_seq2
comp44577_c0_seq1 comp54891_c0_seq3
comp44577_c0_seq1 comp54945_c0_seq1
comp44577_c0_seq1 comp55071_c0_seq1
comp44577_c0_seq1 comp55276_c0_seq1
comp44577_c0_seq1 comp55460_c0_seq1
comp44577_c0_seq1 comp55780_c0_seq6
comp44577_c0_seq1 comp55796_c1_seq1
comp44577_c0_seq1 comp56084_c0_seq2
comp44577_c0_seq1 comp56152_c0_seq2
comp44577_c0_seq1 comp56554_c0_seq2
comp44577_c0_seq1 comp56700_c0_seq2
comp44577_c0_seq1 comp56804_c0_seq1
comp44577_c0_seq1 comp56809_c0_seq1
comp44577_c0_seq1 comp57029_c0_seq2
comp44577_c0_seq1 comp57093_c2_seq1
comp44577_c0_seq1 comp57851_c0_seq33
comp44577_c0_seq1 comp58379_c1_seq1
comp44577_c0_seq1 comp58393_c0_seq7
comp44577_c0_seq1 comp58427_c0_seq2
comp44577_c0_seq1 comp58554_c1_seq3
comp44577_c0_seq1 comp59022_c2_seq20
comp44577_c0_seq1 comp59294_c1_seq16
comp44577_c0_seq1 comp59300_c0_seq20
comp44577_c0_seq1 comp59339_c0_seq11
comp44577_c0_seq1 comp59570_c0_seq1
comp44577_c0_seq1 comp59759_c0_seq2
comp44577_c0_seq1 comp59786_c0_seq2
comp44577_c0_seq1 comp59811_c2_seq6
comp44577_c0_seq1 comp59824_c3_seq3
comp44577_c0_seq1 comp60158_c0_seq3
comp44577_c0_seq1 comp60315_c0_seq1
comp44577_c0_seq1 comp60433_c0_seq1
comp44577_c0_seq1 comp61422_c0_seq1
comp44643_c0_seq1 comp50178_c0_seq1
comp44643_c0_seq1 comp55030_c0_seq1
comp44643_c0_seq1 comp55263_c1_seq2
comp44643_c0_seq1 comp56523_c0_seq29
comp44643_c0_seq1 comp57552_c0_seq4
comp44643_c0_seq1 comp57615_c0_seq3
comp44643_c0_seq1 comp57909_c0_seq3
comp44692_c0_seq1 comp45892_c0_seq1
comp44692_c0_seq1 comp50345_c0_seq1
comp44692_c0_seq1 comp56152_c0_seq2
comp44692_c0_seq1 comp56554_c0_seq2
comp44723_c0_seq2 comp49005_c0_seq1
comp44731_c0_seq1 comp47140_c0_seq1
comp44731_c0_seq1 comp50178_c0_seq1
comp44731_c0_seq1 comp50548_c0_seq1
comp44731_c0_seq1 comp51313_c0_seq1
comp44731_c0_seq1 comp52068_c0_seq3
comp44731_c0_seq1 comp52075_c0_seq1
comp44731_c0_seq1 comp55030_c0_seq1
comp44731_c0_seq1 comp55263_c1_seq2
comp44731_c0_seq1 comp56526_c1_seq5
comp44731_c0_seq1 comp57552_c0_seq4
comp44731_c0_seq1 comp57909_c0_seq3
comp44731_c0_seq1 comp58794_c0_seq3
comp44731_c0_seq1 comp58859_c0_seq17
comp44731_c0_seq1 comp59227_c0_seq2
comp44731_c0_seq1 comp59328_c0_seq1
comp44731_c0_seq1 comp59650_c1_seq1
comp44740_c0_seq1 comp50315_c0_seq3
comp44740_c0_seq1 comp55155_c0_seq2
comp44740_c0_seq1 comp55271_c1_seq2
comp44740_c0_seq1 comp58201_c1_seq1
comp44845_c1_seq1 comp47140_c0_seq1
comp45001_c0_seq1 comp46415_c0_seq1
comp45001_c0_seq1 comp48557_c0_seq1
comp45001_c0_seq1 comp52258_c0_seq2
comp45001_c0_seq1 comp53237_c0_seq2
comp45001_c0_seq1 comp53960_c0_seq3
comp45001_c0_seq1 comp54559_c0_seq2
comp45001_c0_seq1 comp56084_c0_seq2
comp45001_c0_seq1 comp59680_c2_seq4
comp45001_c0_seq1 comp59715_c0_seq9
comp45191_c0_seq2 comp46934_c0_seq1
comp45191_c0_seq2 comp59489_c1_seq1
comp45215_c0_seq1 comp46415_c0_seq1
comp45215_c0_seq1 comp48557_c0_seq1
comp45215_c0_seq1 comp52258_c0_seq2
comp45215_c0_seq1 comp53237_c0_seq2
comp45215_c0_seq1 comp54559_c0_seq2
comp45215_c0_seq1 comp56084_c0_seq2
comp45392_c0_seq1 comp45811_c0_seq1
comp45392_c0_seq1 comp48997_c0_seq1
comp45392_c0_seq1 comp50943_c0_seq2
comp45392_c0_seq1 comp56385_c0_seq2
comp45392_c0_seq1 comp59027_c3_seq2
comp45452_c0_seq2 comp52136_c0_seq1
comp45452_c0_seq2 comp56297_c0_seq2
comp45452_c0_seq2 comp57260_c0_seq12
comp45452_c0_seq2 comp57625_c1_seq31
comp45452_c0_seq2 comp58770_c0_seq8
comp45452_c0_seq2 comp59497_c0_seq12
comp45468_c0_seq1 comp51133_c0_seq2
comp45468_c0_seq1 comp52598_c0_seq1
comp45468_c0_seq1 comp54610_c0_seq11
comp45468_c0_seq1 comp54856_c0_seq2
comp45468_c0_seq1 comp55866_c2_seq1
comp45468_c0_seq1 comp56548_c6_seq59
comp45468_c0_seq1 comp56559_c3_seq15
comp45468_c0_seq1 comp57058_c0_seq2
comp45570_c0_seq2 comp50178_c0_seq1
comp45570_c0_seq2 comp54213_c1_seq1
comp45570_c0_seq2 comp55030_c0_seq1
comp45570_c0_seq2 comp55263_c1_seq2
comp45570_c0_seq2 comp56995_c0_seq2
comp45570_c0_seq2 comp57552_c0_seq4
comp45570_c0_seq2 comp57909_c0_seq3
comp45575_c0_seq1 comp45811_c0_seq1
comp45575_c0_seq1 comp48997_c0_seq1
comp45575_c0_seq1 comp50943_c0_seq2
comp45575_c0_seq1 comp54580_c0_seq2
comp45575_c0_seq1 comp59027_c3_seq2
comp45711_c0_seq1 comp46415_c0_seq1
comp45711_c0_seq1 comp46642_c0_seq1
comp45711_c0_seq1 comp48557_c0_seq1
comp45711_c0_seq1 comp52258_c0_seq2
comp45711_c0_seq1 comp53237_c0_seq2
comp45711_c0_seq1 comp54559_c0_seq2
comp45711_c0_seq1 comp54580_c0_seq2
comp45711_c0_seq1 comp56084_c0_seq2
comp45711_c0_seq1 comp56607_c0_seq1
comp45711_c0_seq1 comp56884_c3_seq2
comp45711_c0_seq1 comp57532_c1_seq2
comp45711_c0_seq1 comp59892_c0_seq24
comp45714_c0_seq1 comp47308_c0_seq2
comp45714_c0_seq1 comp49825_c0_seq1
comp45714_c0_seq1 comp57097_c1_seq1
comp45722_c0_seq1 comp49031_c1_seq1
comp45722_c0_seq1 comp50551_c0_seq4
comp45722_c0_seq1 comp52514_c1_seq1
comp45773_c0_seq2 comp47869_c0_seq1
comp45773_c0_seq2 comp49661_c0_seq1
comp45773_c0_seq2 comp50202_c0_seq2
comp45773_c0_seq2 comp53248_c0_seq2
comp45773_c0_seq2 comp54043_c0_seq5
comp45773_c0_seq2 comp56821_c0_seq1
comp45773_c0_seq2 comp58012_c0_seq19
comp45773_c0_seq2 comp59009_c0_seq2
comp45773_c0_seq2 comp59339_c0_seq11
comp45777_c0_seq2 comp51789_c0_seq4
comp45811_c0_seq1 comp46444_c0_seq1
comp45811_c0_seq1 comp47031_c0_seq1
comp45811_c0_seq1 comp47272_c0_seq1
comp45811_c0_seq1 comp48732_c0_seq1
comp45811_c0_seq1 comp49548_c0_seq3
comp45811_c0_seq1 comp49609_c0_seq1
comp45811_c0_seq1 comp49670_c0_seq1
comp45811_c0_seq1 comp50421_c0_seq1
comp45811_c0_seq1 comp51526_c0_seq6
comp45811_c0_seq1 comp52110_c0_seq1
comp45811_c0_seq1 comp53376_c0_seq1
comp45811_c0_seq1 comp53900_c0_seq1
comp45811_c0_seq1 comp53916_c0_seq1
comp45811_c0_seq1 comp54302_c0_seq2
comp45811_c0_seq1 comp54580_c0_seq2
comp45811_c0_seq1 comp54736_c1_seq2
comp45811_c0_seq1 comp54868_c0_seq2
comp45811_c0_seq1 comp55379_c1_seq2
comp45811_c0_seq1 comp56083_c0_seq2
comp45811_c0_seq1 comp56187_c0_seq4
comp45811_c0_seq1 comp56282_c0_seq2
comp45811_c0_seq1 comp56346_c0_seq2
comp45811_c0_seq1 comp56385_c0_seq2
comp45811_c0_seq1 comp57847_c0_seq5
comp45811_c0_seq1 comp58157_c0_seq2
comp45811_c0_seq1 comp59027_c3_seq2
comp45811_c0_seq1 comp59994_c0_seq8
comp45826_c0_seq1 comp50913_c0_seq2
comp45826_c0_seq1 comp52730_c0_seq1
comp45826_c0_seq1 comp56152_c0_seq2
comp45826_c0_seq1 comp56554_c0_seq2
comp45826_c0_seq1 comp59034_c7_seq2
comp45826_c0_seq1 comp59291_c1_seq1
comp45826_c0_seq1 comp59306_c0_seq2
comp45869_c0_seq1 comp50913_c0_seq2
comp45869_c0_seq1 comp52730_c0_seq1
comp45869_c0_seq1 comp56152_c0_seq2
comp45869_c0_seq1 comp56554_c0_seq2
comp45869_c0_seq1 comp59034_c7_seq2
comp45869_c0_seq1 comp59291_c1_seq1
comp45869_c0_seq1 comp59306_c0_seq2
comp45887_c0_seq9 comp55681_c0_seq1
comp45887_c0_seq9 comp59650_c1_seq1
comp45892_c0_seq1 comp47798_c0_seq1
comp45892_c0_seq1 comp48010_c0_seq1
comp45892_c0_seq1 comp52208_c0_seq2
comp45892_c0_seq1 comp53050_c0_seq1
comp45892_c0_seq1 comp56565_c0_seq2
comp45892_c0_seq1 comp56809_c0_seq1
comp45892_c0_seq1 comp57615_c0_seq3
comp45892_c0_seq1 comp58397_c0_seq1
comp45892_c0_seq1 comp59133_c0_seq2
comp45915_c0_seq1 comp53415_c1_seq2
comp45915_c0_seq1 comp55438_c3_seq1
comp45915_c0_seq1 comp56202_c0_seq2
comp45919_c0_seq2 comp60096_c1_seq12
comp45965_c0_seq2 comp51813_c0_seq2
comp45965_c0_seq2 comp57535_c2_seq1
comp46005_c0_seq1 comp52413_c0_seq3
comp46005_c0_seq1 comp54162_c0_seq1
comp46005_c0_seq1 comp54858_c0_seq2
comp46005_c0_seq1 comp56404_c3_seq10
comp46005_c0_seq1 comp57857_c0_seq2
comp46005_c0_seq1 comp57883_c0_seq6
comp46005_c0_seq1 comp58069_c0_seq22
comp46005_c0_seq1 comp58402_c1_seq1
comp46015_c0_seq1 comp50178_c0_seq1
comp46015_c0_seq1 comp52437_c0_seq1
comp46015_c0_seq1 comp53960_c0_seq3
comp46015_c0_seq1 comp55030_c0_seq1
comp46015_c0_seq1 comp55263_c1_seq2
comp46015_c0_seq1 comp55654_c1_seq27
comp46015_c0_seq1 comp56523_c0_seq29
comp46015_c0_seq1 comp57552_c0_seq4
comp46015_c0_seq1 comp57615_c0_seq3
comp46015_c0_seq1 comp57909_c0_seq3
comp46015_c0_seq1 comp58855_c1_seq15
comp46015_c0_seq1 comp59680_c2_seq4
comp46015_c0_seq1 comp59715_c0_seq9
comp46074_c0_seq2 comp58824_c1_seq21
comp46077_c0_seq1 comp53958_c0_seq2
comp46077_c0_seq1 comp57972_c0_seq1
comp46083_c0_seq2 comp49609_c0_seq1
comp46125_c0_seq4 comp56867_c0_seq1
comp46135_c0_seq5 comp53296_c0_seq3
comp46135_c0_seq5 comp53959_c0_seq1
comp46135_c0_seq5 comp55438_c3_seq1
comp46135_c0_seq5 comp55575_c0_seq2
comp46135_c0_seq5 comp57647_c0_seq2
comp46135_c0_seq5 comp59592_c1_seq1
comp46139_c0_seq1 comp53960_c0_seq3
comp46139_c0_seq1 comp59680_c2_seq4
comp46139_c0_seq1 comp59715_c0_seq9
comp46147_c0_seq1 comp49193_c0_seq2
comp46147_c0_seq1 comp54912_c0_seq1
comp46147_c0_seq1 comp58244_c0_seq2
comp46147_c0_seq1 comp59658_c2_seq3
comp46176_c0_seq1 comp49848_c0_seq1
comp46176_c0_seq1 comp51068_c0_seq4
comp46176_c0_seq1 comp51433_c0_seq3
comp46176_c0_seq1 comp51827_c0_seq1
comp46176_c0_seq1 comp55237_c0_seq1
comp46176_c0_seq1 comp56287_c1_seq2
comp46176_c0_seq1 comp57746_c0_seq1
comp46176_c0_seq1 comp57829_c0_seq1
comp46176_c0_seq1 comp59294_c1_seq16
comp46180_c0_seq1 comp55839_c0_seq2
comp46180_c0_seq1 comp56333_c0_seq2
comp46180_c0_seq1 comp59401_c1_seq6
comp46247_c1_seq2 comp48423_c0_seq2
comp46267_c0_seq1 comp50305_c0_seq1
comp46270_c1_seq1 comp60096_c1_seq12
comp46296_c0_seq1 comp47140_c0_seq1
comp46296_c0_seq1 comp56758_c0_seq16
comp46326_c0_seq3 comp53114_c1_seq4
comp46345_c0_seq1 comp51869_c0_seq1
comp46345_c0_seq1 comp56202_c0_seq2
comp46351_c0_seq3 comp52068_c0_seq3
comp46351_c0_seq3 comp56526_c1_seq5
comp46379_c0_seq2 comp56411_c0_seq5
comp46415_c0_seq1 comp46549_c0_seq1
comp46415_c0_seq1 comp46570_c0_seq1
comp46415_c0_seq1 comp47308_c0_seq2
comp46415_c0_seq1 comp47475_c0_seq3
comp46415_c0_seq1 comp47649_c0_seq1
comp46415_c0_seq1 comp47997_c0_seq3
comp46415_c0_seq1 comp48076_c0_seq2
comp46415_c0_seq1 comp48112_c0_seq4
comp46415_c0_seq1 comp48557_c0_seq1
comp46415_c0_seq1 comp48597_c0_seq2
comp46415_c0_seq1 comp48812_c0_seq1
comp46415_c0_seq1 comp48839_c0_seq1
comp46415_c0_seq1 comp49105_c0_seq1
comp46415_c0_seq1 comp49179_c0_seq1
comp46415_c0_seq1 comp49353_c0_seq2
comp46415_c0_seq1 comp49406_c1_seq1
comp46415_c0_seq1 comp49497_c0_seq5
comp46415_c0_seq1 comp49825_c0_seq1
comp46415_c0_seq1 comp49846_c0_seq2
comp46415_c0_seq1 comp50161_c0_seq1
comp46415_c0_seq1 comp50172_c2_seq1
comp46415_c0_seq1 comp50178_c0_seq1
comp46415_c0_seq1 comp50598_c0_seq1
comp46415_c0_seq1 comp50917_c0_seq1
comp46415_c0_seq1 comp50963_c0_seq1
comp46415_c0_seq1 comp51291_c0_seq1
comp46415_c0_seq1 comp51426_c0_seq9
comp46415_c0_seq1 comp51582_c0_seq1
comp46415_c0_seq1 comp51761_c0_seq1
comp46415_c0_seq1 comp51827_c0_seq1
comp46415_c0_seq1 comp51869_c0_seq1
comp46415_c0_seq1 comp52258_c0_seq2
comp46415_c0_seq1 comp52273_c0_seq2
comp46415_c0_seq1 comp52403_c0_seq2
comp46415_c0_seq1 comp52414_c0_seq1
comp46415_c0_seq1 comp52474_c0_seq3
comp46415_c0_seq1 comp52478_c0_seq3
comp46415_c0_seq1 comp52540_c1_seq2
comp46415_c0_seq1 comp52588_c0_seq1
comp46415_c0_seq1 comp52700_c1_seq3
comp46415_c0_seq1 comp52714_c0_seq1
comp46415_c0_seq1 comp52745_c0_seq1
comp46415_c0_seq1 comp52755_c2_seq1
comp46415_c0_seq1 comp52955_c0_seq2
comp46415_c0_seq1 comp53237_c0_seq2
comp46415_c0_seq1 comp53335_c0_seq5
comp46415_c0_seq1 comp53353_c0_seq2
comp46415_c0_seq1 comp53452_c0_seq2
comp46415_c0_seq1 comp53870_c0_seq5
comp46415_c0_seq1 comp53944_c0_seq2
comp46415_c0_seq1 comp54003_c0_seq1
comp46415_c0_seq1 comp54035_c0_seq3
comp46415_c0_seq1 comp54149_c0_seq1
comp46415_c0_seq1 comp54217_c0_seq2
comp46415_c0_seq1 comp54424_c0_seq2
comp46415_c0_seq1 comp54477_c0_seq3
comp46415_c0_seq1 comp54559_c0_seq2
comp46415_c0_seq1 comp54771_c0_seq1
comp46415_c0_seq1 comp54813_c0_seq1
comp46415_c0_seq1 comp54877_c0_seq2
comp46415_c0_seq1 comp55030_c0_seq1
comp46415_c0_seq1 comp55225_c0_seq2
comp46415_c0_seq1 comp55231_c0_seq2
comp46415_c0_seq1 comp55237_c0_seq1
comp46415_c0_seq1 comp55263_c1_seq2
comp46415_c0_seq1 comp55318_c0_seq2
comp46415_c0_seq1 comp55541_c0_seq2
comp46415_c0_seq1 comp55602_c0_seq2
comp46415_c0_seq1 comp55700_c0_seq1
comp46415_c0_seq1 comp55732_c0_seq5
comp46415_c0_seq1 comp55764_c0_seq2
comp46415_c0_seq1 comp55820_c0_seq1
comp46415_c0_seq1 comp56084_c0_seq2
comp46415_c0_seq1 comp56158_c0_seq1
comp46415_c0_seq1 comp56287_c1_seq2
comp46415_c0_seq1 comp56372_c0_seq2
comp46415_c0_seq1 comp56380_c1_seq24
comp46415_c0_seq1 comp56427_c1_seq1
comp46415_c0_seq1 comp56489_c0_seq14
comp46415_c0_seq1 comp56536_c0_seq1
comp46415_c0_seq1 comp56620_c2_seq4
comp46415_c0_seq1 comp56688_c0_seq4
comp46415_c0_seq1 comp56739_c0_seq3
comp46415_c0_seq1 comp56759_c0_seq4
comp46415_c0_seq1 comp56762_c3_seq1
comp46415_c0_seq1 comp56794_c0_seq1
comp46415_c0_seq1 comp56798_c0_seq6
comp46415_c0_seq1 comp56861_c0_seq2
comp46415_c0_seq1 comp56916_c0_seq1
comp46415_c0_seq1 comp56930_c0_seq3
comp46415_c0_seq1 comp57017_c0_seq2
comp46415_c0_seq1 comp57069_c0_seq3
comp46415_c0_seq1 comp57097_c1_seq1
comp46415_c0_seq1 comp57109_c0_seq1
comp46415_c0_seq1 comp57149_c0_seq4
comp46415_c0_seq1 comp57210_c0_seq2
comp46415_c0_seq1 comp57226_c1_seq1
comp46415_c0_seq1 comp57227_c0_seq4
comp46415_c0_seq1 comp57237_c0_seq80
comp46415_c0_seq1 comp57239_c1_seq1
comp46415_c0_seq1 comp57292_c1_seq2
comp46415_c0_seq1 comp57434_c1_seq25
comp46415_c0_seq1 comp57540_c0_seq3
comp46415_c0_seq1 comp57552_c0_seq4
comp46415_c0_seq1 comp57609_c0_seq1
comp46415_c0_seq1 comp57612_c0_seq2
comp46415_c0_seq1 comp57627_c1_seq6
comp46415_c0_seq1 comp57649_c0_seq12
comp46415_c0_seq1 comp57664_c1_seq5
comp46415_c0_seq1 comp57683_c1_seq15
comp46415_c0_seq1 comp57747_c0_seq14
comp46415_c0_seq1 comp57829_c0_seq1
comp46415_c0_seq1 comp57861_c0_seq1
comp46415_c0_seq1 comp57876_c0_seq3
comp46415_c0_seq1 comp57909_c0_seq3
comp46415_c0_seq1 comp57910_c0_seq11
comp46415_c0_seq1 comp57972_c0_seq1
comp46415_c0_seq1 comp58194_c0_seq13
comp46415_c0_seq1 comp58387_c2_seq2
comp46415_c0_seq1 comp58396_c0_seq2
comp46415_c0_seq1 comp58604_c0_seq1
comp46415_c0_seq1 comp58623_c0_seq4
comp46415_c0_seq1 comp58719_c0_seq2
comp46415_c0_seq1 comp58819_c0_seq2
comp46415_c0_seq1 comp58992_c0_seq4
comp46415_c0_seq1 comp59014_c0_seq3
comp46415_c0_seq1 comp59027_c3_seq2
comp46415_c0_seq1 comp59120_c0_seq2
comp46415_c0_seq1 comp59167_c0_seq5
comp46415_c0_seq1 comp59185_c0_seq3
comp46415_c0_seq1 comp59253_c2_seq41
comp46415_c0_seq1 comp59262_c0_seq1
comp46415_c0_seq1 comp59381_c0_seq50
comp46415_c0_seq1 comp59386_c0_seq19
comp46415_c0_seq1 comp59399_c0_seq20
comp46415_c0_seq1 comp59439_c0_seq3
comp46415_c0_seq1 comp59548_c0_seq8
comp46415_c0_seq1 comp59562_c0_seq32
comp46415_c0_seq1 comp59572_c0_seq3
comp46415_c0_seq1 comp59583_c0_seq2
comp46415_c0_seq1 comp59601_c0_seq5
comp46415_c0_seq1 comp59647_c0_seq6
comp46415_c0_seq1 comp59748_c0_seq1
comp46415_c0_seq1 comp59757_c1_seq5
comp46415_c0_seq1 comp59786_c0_seq2
comp46415_c0_seq1 comp59815_c0_seq3
comp46415_c0_seq1 comp59822_c0_seq6
comp46415_c0_seq1 comp59868_c0_seq3
comp46415_c0_seq1 comp59875_c1_seq8
comp46415_c0_seq1 comp59942_c0_seq2
comp46415_c0_seq1 comp59986_c0_seq1
comp46415_c0_seq1 comp59987_c0_seq2
comp46415_c0_seq1 comp60007_c0_seq12
comp46415_c0_seq1 comp60080_c1_seq1
comp46415_c0_seq1 comp60091_c0_seq2
comp46415_c0_seq1 comp61454_c0_seq1
comp46415_c0_seq1 comp97705_c0_seq1
comp46444_c0_seq1 comp48997_c0_seq1
comp46444_c0_seq1 comp49609_c0_seq1
comp46444_c0_seq1 comp50943_c0_seq2
comp46459_c0_seq1 comp50178_c0_seq1
comp46459_c0_seq1 comp57909_c0_seq3
comp46486_c0_seq1 comp46974_c0_seq3
comp46510_c0_seq1 comp56523_c0_seq29
comp46529_c0_seq1 comp52136_c0_seq1
comp46529_c0_seq1 comp56297_c0_seq2
comp46529_c0_seq1 comp57260_c0_seq12
comp46529_c0_seq1 comp57625_c1_seq31
comp46529_c0_seq1 comp58770_c0_seq8
comp46529_c0_seq1 comp58824_c1_seq21
comp46529_c0_seq1 comp59497_c0_seq12
comp46549_c0_seq1 comp47185_c0_seq1
comp46549_c0_seq1 comp47475_c0_seq3
comp46549_c0_seq1 comp48557_c0_seq1
comp46549_c0_seq1 comp52258_c0_seq2
comp46549_c0_seq1 comp52588_c0_seq1
comp46549_c0_seq1 comp53237_c0_seq2
comp46549_c0_seq1 comp54003_c0_seq1
comp46549_c0_seq1 comp54559_c0_seq2
comp46549_c0_seq1 comp54580_c0_seq2
comp46549_c0_seq1 comp56084_c0_seq2
comp46549_c0_seq1 comp57664_c1_seq5
comp46549_c0_seq1 comp59082_c2_seq12
comp46549_c0_seq1 comp97705_c0_seq1
comp46570_c0_seq1 comp48557_c0_seq1
comp46570_c0_seq1 comp52258_c0_seq2
comp46570_c0_seq1 comp53237_c0_seq2
comp46570_c0_seq1 comp54559_c0_seq2
comp46570_c0_seq1 comp56084_c0_seq2
comp46575_c0_seq1 comp58377_c0_seq9
comp46591_c0_seq1 comp52208_c0_seq2
comp46623_c0_seq1 comp56096_c0_seq3
comp46623_c0_seq1 comp57407_c1_seq1
comp46642_c0_seq1 comp56607_c0_seq1
comp46642_c0_seq1 comp58387_c2_seq2
comp46642_c0_seq1 comp59572_c0_seq3
comp46657_c0_seq1 comp54580_c0_seq2
comp46670_c1_seq1 comp49889_c0_seq2
comp46680_c1_seq3 comp55318_c0_seq2
comp46711_c0_seq3 comp47010_c0_seq1
comp46711_c0_seq3 comp48216_c0_seq1
comp46711_c0_seq3 comp54211_c1_seq1
comp46711_c0_seq3 comp54325_c0_seq1
comp46711_c0_seq3 comp54352_c0_seq2
comp46711_c0_seq3 comp54644_c0_seq1
comp46711_c0_seq3 comp56070_c0_seq14
comp46711_c0_seq3 comp56834_c0_seq5
comp46784_c0_seq4 comp49393_c0_seq1
comp46784_c0_seq4 comp51941_c0_seq17
comp46816_c0_seq1 comp49428_c0_seq2
comp46816_c0_seq1 comp52977_c0_seq2
comp46830_c0_seq1 comp48247_c0_seq1
comp46830_c0_seq1 comp51313_c0_seq1
comp46830_c0_seq1 comp52923_c0_seq3
comp46830_c0_seq1 comp54813_c0_seq1
comp46830_c0_seq1 comp55644_c0_seq1
comp46830_c0_seq1 comp57267_c0_seq1
comp46830_c0_seq1 comp57434_c1_seq25
comp46830_c0_seq1 comp57627_c1_seq6
comp46830_c0_seq1 comp58428_c0_seq12
comp46830_c0_seq1 comp58719_c0_seq2
comp46830_c0_seq1 comp59227_c0_seq2
comp46853_c0_seq1 comp51133_c0_seq2
comp46853_c0_seq1 comp52598_c0_seq1
comp46853_c0_seq1 comp54610_c0_seq11
comp46853_c0_seq1 comp54856_c0_seq2
comp46853_c0_seq1 comp55001_c0_seq1
comp46853_c0_seq1 comp55866_c2_seq1
comp46853_c0_seq1 comp56559_c3_seq15
comp46853_c0_seq1 comp57058_c0_seq2
comp46853_c0_seq1 comp61080_c0_seq1
comp46890_c0_seq1 comp48597_c0_seq2
comp46890_c0_seq1 comp50730_c0_seq3
comp46890_c0_seq1 comp52958_c0_seq1
comp46890_c0_seq1 comp54717_c0_seq4
comp46904_c2_seq1 comp58151_c1_seq2
comp46904_c2_seq1 comp58345_c0_seq1
comp46904_c2_seq1 comp59219_c1_seq1
comp46908_c0_seq1 comp56523_c0_seq29
comp46924_c0_seq1 comp46934_c0_seq1
comp46924_c0_seq1 comp54580_c0_seq2
comp46934_c0_seq1 comp47257_c0_seq1
comp46934_c0_seq1 comp49274_c0_seq1
comp46934_c0_seq1 comp49904_c0_seq1
comp46934_c0_seq1 comp50155_c0_seq3
comp46934_c0_seq1 comp50305_c0_seq1
comp46934_c0_seq1 comp50574_c0_seq1
comp46934_c0_seq1 comp50948_c0_seq1
comp46934_c0_seq1 comp51342_c0_seq1
comp46934_c0_seq1 comp51792_c0_seq2
comp46934_c0_seq1 comp52368_c0_seq11
comp46934_c0_seq1 comp52795_c0_seq2
comp46934_c0_seq1 comp52956_c0_seq3
comp46934_c0_seq1 comp53051_c0_seq5
comp46934_c0_seq1 comp53526_c1_seq3
comp46934_c0_seq1 comp54270_c0_seq2
comp46934_c0_seq1 comp55882_c1_seq3
comp46934_c0_seq1 comp58299_c0_seq2
comp46934_c0_seq1 comp58724_c0_seq2
comp46934_c0_seq1 comp59489_c1_seq1
comp46934_c0_seq1 comp60842_c0_seq1
comp46934_c0_seq1 comp60981_c0_seq1
comp46937_c0_seq1 comp56493_c0_seq2
comp46956_c0_seq1 comp51063_c0_seq3
comp46956_c0_seq1 comp53767_c0_seq2
comp46956_c0_seq1 comp56939_c2_seq7
comp46967_c0_seq1 comp50178_c0_seq1
comp46967_c0_seq1 comp57909_c0_seq3
comp46971_c0_seq2 comp52437_c0_seq1
comp46971_c0_seq2 comp54809_c0_seq1
comp46971_c0_seq2 comp55654_c1_seq27
comp46971_c0_seq2 comp57248_c0_seq1
comp46971_c0_seq2 comp57483_c0_seq5
comp46971_c0_seq2 comp57936_c0_seq1
comp46971_c0_seq2 comp58073_c0_seq1
comp46971_c0_seq2 comp58844_c0_seq16
comp46971_c0_seq2 comp59038_c0_seq3
comp46971_c0_seq2 comp59370_c0_seq1
comp46971_c0_seq2 comp59742_c1_seq3
comp46971_c0_seq2 comp59973_c0_seq6
comp46974_c0_seq3 comp47140_c0_seq1
comp46974_c0_seq3 comp47914_c0_seq1
comp46974_c0_seq3 comp48115_c0_seq1
comp46974_c0_seq3 comp50913_c0_seq2
comp46974_c0_seq3 comp51281_c0_seq3
comp46974_c0_seq3 comp52140_c0_seq2
comp46974_c0_seq3 comp52568_c0_seq1
comp46974_c0_seq3 comp52730_c0_seq1
comp46974_c0_seq3 comp55496_c1_seq2
comp46974_c0_seq3 comp56152_c0_seq2
comp46974_c0_seq3 comp56554_c0_seq2
comp46974_c0_seq3 comp59034_c7_seq2
comp46974_c0_seq3 comp59291_c1_seq1
comp46974_c0_seq3 comp59339_c0_seq11
comp46974_c0_seq3 comp60595_c0_seq1
comp46993_c0_seq1 comp50218_c0_seq1
comp46993_c0_seq1 comp59862_c0_seq7
comp47001_c0_seq1 comp50143_c1_seq1
comp47010_c0_seq1 comp48216_c0_seq1
comp47010_c0_seq1 comp54211_c1_seq1
comp47010_c0_seq1 comp54644_c0_seq1
comp47010_c0_seq1 comp56070_c0_seq14
comp47010_c0_seq1 comp56129_c0_seq1
comp47027_c0_seq1 comp55138_c0_seq1
comp47031_c0_seq1 comp48997_c0_seq1
comp47031_c0_seq1 comp50943_c0_seq2
comp47031_c0_seq1 comp54580_c0_seq2
comp47031_c0_seq1 comp59027_c3_seq2
comp47042_c0_seq1 comp51675_c0_seq1
comp47075_c0_seq1 comp47475_c0_seq3
comp47075_c0_seq1 comp52588_c0_seq1
comp47075_c0_seq1 comp53022_c0_seq3
comp47075_c0_seq1 comp54003_c0_seq1
comp47075_c0_seq1 comp57664_c1_seq5
comp47075_c0_seq1 comp59197_c1_seq2
comp47075_c0_seq1 comp59852_c2_seq29
comp47075_c0_seq1 comp97705_c0_seq1
comp47089_c0_seq1 comp52208_c0_seq2
comp47137_c1_seq1 comp52745_c0_seq1
comp47137_c1_seq1 comp54580_c0_seq2
comp47137_c1_seq1 comp56762_c3_seq1
comp47137_c1_seq1 comp57612_c0_seq2
comp47137_c1_seq1 comp58396_c0_seq2
comp47137_c1_seq1 comp59027_c3_seq2
comp47137_c1_seq1 comp59120_c0_seq2
comp47137_c1_seq1 comp60080_c1_seq1
comp47140_c0_seq1 comp47979_c0_seq2
comp47140_c0_seq1 comp49187_c0_seq2
comp47140_c0_seq1 comp49428_c0_seq2
comp47140_c0_seq1 comp49470_c1_seq2
comp47140_c0_seq1 comp49848_c0_seq1
comp47140_c0_seq1 comp51389_c0_seq1
comp47140_c0_seq1 comp51465_c0_seq1
comp47140_c0_seq1 comp51478_c0_seq1
comp47140_c0_seq1 comp51576_c0_seq10
comp47140_c0_seq1 comp51659_c0_seq2
comp47140_c0_seq1 comp52730_c0_seq1
comp47140_c0_seq1 comp52977_c0_seq2
comp47140_c0_seq1 comp53597_c0_seq1
comp47140_c0_seq1 comp53885_c1_seq2
comp47140_c0_seq1 comp54327_c0_seq1
comp47140_c0_seq1 comp54449_c0_seq1
comp47140_c0_seq1 comp54945_c0_seq1
comp47140_c0_seq1 comp55479_c0_seq9
comp47140_c0_seq1 comp55548_c0_seq1
comp47140_c0_seq1 comp56230_c0_seq2
comp47140_c0_seq1 comp56442_c0_seq4
comp47140_c0_seq1 comp56832_c0_seq2
comp47140_c0_seq1 comp56913_c0_seq46
comp47140_c0_seq1 comp57093_c2_seq1
comp47140_c0_seq1 comp58151_c1_seq2
comp47140_c0_seq1 comp58248_c0_seq3
comp47140_c0_seq1 comp58424_c1_seq38
comp47140_c0_seq1 comp58811_c1_seq10
comp47140_c0_seq1 comp59129_c0_seq1
comp47140_c0_seq1 comp59294_c1_seq16
comp47140_c0_seq1 comp59352_c2_seq9
comp47140_c0_seq1 comp59391_c1_seq4
comp47140_c0_seq1 comp59829_c2_seq9
comp47140_c0_seq1 comp60089_c0_seq4
comp47140_c0_seq1 comp61422_c0_seq1
comp47140_c0_seq1 comp62333_c0_seq1
comp47151_c1_seq1 comp53767_c0_seq2
comp47151_c1_seq1 comp56939_c2_seq7
comp47167_c0_seq1 comp51206_c1_seq6
comp47168_c0_seq1 comp48597_c0_seq2
comp47183_c0_seq1 comp49904_c0_seq1
comp47183_c0_seq1 comp50155_c0_seq3
comp47183_c0_seq1 comp53051_c0_seq5
comp47183_c0_seq1 comp56008_c4_seq1
comp47183_c0_seq1 comp60981_c0_seq1
comp47185_c0_seq1 comp48839_c0_seq1
comp47185_c0_seq1 comp50598_c0_seq1
comp47227_c0_seq4 comp53960_c0_seq3
comp47227_c0_seq4 comp59680_c2_seq4
comp47227_c0_seq4 comp59715_c0_seq9
comp47239_c0_seq1 comp58900_c0_seq6
comp47251_c0_seq4 comp51313_c0_seq1
comp47251_c0_seq4 comp59227_c0_seq2
comp47257_c0_seq1 comp50305_c0_seq1
comp47257_c0_seq1 comp52031_c0_seq2
comp47257_c0_seq1 comp52501_c0_seq1
comp47257_c0_seq1 comp52956_c0_seq3
comp47257_c0_seq1 comp54580_c0_seq2
comp47257_c0_seq1 comp57189_c0_seq1
comp47257_c0_seq1 comp57189_c2_seq4
comp47257_c0_seq1 comp59489_c1_seq1
comp47257_c0_seq1 comp60842_c0_seq1
comp47272_c0_seq1 comp48997_c0_seq1
comp47272_c0_seq1 comp50943_c0_seq2
comp47293_c0_seq1 comp48393_c0_seq1
comp47293_c0_seq1 comp51805_c0_seq3
comp47294_c0_seq1 comp58694_c1_seq5
comp47295_c0_seq4 comp48879_c0_seq1
comp47295_c0_seq4 comp56456_c0_seq1
comp47301_c0_seq1 comp58038_c3_seq3
comp47308_c0_seq2 comp48557_c0_seq1
comp47308_c0_seq2 comp52258_c0_seq2
comp47308_c0_seq2 comp52345_c0_seq1
comp47308_c0_seq2 comp53237_c0_seq2
comp47308_c0_seq2 comp53425_c0_seq1
comp47308_c0_seq2 comp54559_c0_seq2
comp47308_c0_seq2 comp55342_c0_seq5
comp47308_c0_seq2 comp55766_c0_seq9
comp47308_c0_seq2 comp56084_c0_seq2
comp47308_c0_seq2 comp57197_c0_seq4
comp47308_c0_seq2 comp57985_c0_seq2
comp47308_c0_seq2 comp58544_c0_seq1
comp47308_c0_seq2 comp59447_c0_seq33
comp47308_c0_seq2 comp59615_c0_seq91
comp47331_c1_seq3 comp53960_c0_seq3
comp47331_c1_seq3 comp59140_c0_seq2
comp47331_c1_seq3 comp59680_c2_seq4
comp47331_c1_seq3 comp59715_c0_seq9
comp47355_c0_seq6 comp56739_c0_seq3
comp47433_c0_seq1 comp52487_c0_seq1
comp47433_c0_seq1 comp57067_c0_seq3
comp47469_c0_seq1 comp52068_c0_seq3
comp47469_c0_seq1 comp56526_c1_seq5
comp47475_c0_seq3 comp48557_c0_seq1
comp47475_c0_seq3 comp48839_c0_seq1
comp47475_c0_seq3 comp50598_c0_seq1
comp47475_c0_seq3 comp52258_c0_seq2
comp47475_c0_seq3 comp53237_c0_seq2
comp47475_c0_seq3 comp54559_c0_seq2
comp47475_c0_seq3 comp54580_c0_seq2
comp47475_c0_seq3 comp56084_c0_seq2
comp47475_c0_seq3 comp59082_c2_seq12
comp47484_c0_seq1 comp54467_c0_seq2
comp47492_c0_seq1 comp50836_c0_seq2
comp47593_c0_seq1 comp54035_c0_seq3
comp47593_c0_seq1 comp55030_c0_seq1
comp47593_c0_seq1 comp55263_c1_seq2
comp47593_c0_seq1 comp55839_c0_seq2
comp47593_c0_seq1 comp59401_c1_seq6
comp47597_c0_seq2 comp50836_c0_seq2
comp47597_c0_seq2 comp54496_c0_seq3
comp47643_c0_seq1 comp56995_c0_seq2
comp47649_c0_seq1 comp48557_c0_seq1
comp47649_c0_seq1 comp52258_c0_seq2
comp47649_c0_seq1 comp53237_c0_seq2
comp47649_c0_seq1 comp54559_c0_seq2
comp47649_c0_seq1 comp56084_c0_seq2
comp47722_c0_seq1 comp54580_c0_seq2
comp47729_c0_seq3 comp53642_c0_seq2
comp47729_c0_seq3 comp56874_c0_seq2
comp47747_c0_seq1 comp54580_c0_seq2
comp47754_c0_seq1 comp57771_c0_seq3
comp47754_c0_seq1 comp57782_c3_seq4
comp47777_c0_seq1 comp54580_c0_seq2
comp47792_c0_seq4 comp55681_c0_seq1
comp47798_c0_seq1 comp47881_c0_seq1
comp47798_c0_seq1 comp47916_c0_seq1
comp47798_c0_seq1 comp48010_c0_seq1
comp47798_c0_seq1 comp48045_c0_seq1
comp47798_c0_seq1 comp48183_c0_seq1
comp47798_c0_seq1 comp49506_c0_seq1
comp47798_c0_seq1 comp49671_c0_seq2
comp47798_c0_seq1 comp50178_c0_seq1
comp47798_c0_seq1 comp50345_c0_seq1
comp47798_c0_seq1 comp50533_c0_seq5
comp47798_c0_seq1 comp50913_c0_seq2
comp47798_c0_seq1 comp51186_c0_seq2
comp47798_c0_seq1 comp51255_c1_seq1
comp47798_c0_seq1 comp51508_c0_seq1
comp47798_c0_seq1 comp52208_c0_seq2
comp47798_c0_seq1 comp52299_c1_seq2
comp47798_c0_seq1 comp52478_c0_seq3
comp47798_c0_seq1 comp52677_c0_seq2
comp47798_c0_seq1 comp53050_c0_seq1
comp47798_c0_seq1 comp53058_c0_seq1
comp47798_c0_seq1 comp53082_c0_seq1
comp47798_c0_seq1 comp53469_c0_seq6
comp47798_c0_seq1 comp53562_c0_seq1
comp47798_c0_seq1 comp53664_c0_seq2
comp47798_c0_seq1 comp54035_c0_seq3
comp47798_c0_seq1 comp54146_c1_seq2
comp47798_c0_seq1 comp54673_c0_seq2
comp47798_c0_seq1 comp54749_c0_seq3
comp47798_c0_seq1 comp54953_c0_seq1
comp47798_c0_seq1 comp55030_c0_seq1
comp47798_c0_seq1 comp55263_c1_seq2
comp47798_c0_seq1 comp55282_c0_seq1
comp47798_c0_seq1 comp55298_c0_seq6
comp47798_c0_seq1 comp55379_c0_seq4
comp47798_c0_seq1 comp55770_c0_seq3
comp47798_c0_seq1 comp55796_c1_seq1
comp47798_c0_seq1 comp55899_c0_seq3
comp47798_c0_seq1 comp56152_c0_seq2
comp47798_c0_seq1 comp56355_c0_seq1
comp47798_c0_seq1 comp56399_c0_seq10
comp47798_c0_seq1 comp56405_c0_seq3
comp47798_c0_seq1 comp56406_c0_seq5
comp47798_c0_seq1 comp56523_c0_seq29
comp47798_c0_seq1 comp56554_c0_seq2
comp47798_c0_seq1 comp56565_c0_seq2
comp47798_c0_seq1 comp56809_c0_seq1
comp47798_c0_seq1 comp56811_c0_seq12
comp47798_c0_seq1 comp56829_c0_seq2
comp47798_c0_seq1 comp56833_c0_seq2
comp47798_c0_seq1 comp56977_c3_seq1
comp47798_c0_seq1 comp57021_c0_seq3
comp47798_c0_seq1 comp57123_c0_seq5
comp47798_c0_seq1 comp57291_c0_seq2
comp47798_c0_seq1 comp57552_c0_seq4
comp47798_c0_seq1 comp57615_c0_seq3
comp47798_c0_seq1 comp57672_c0_seq1
comp47798_c0_seq1 comp57851_c0_seq33
comp47798_c0_seq1 comp57909_c0_seq3
comp47798_c0_seq1 comp58082_c1_seq3
comp47798_c0_seq1 comp58151_c1_seq2
comp47798_c0_seq1 comp58198_c0_seq2
comp47798_c0_seq1 comp58391_c0_seq4
comp47798_c0_seq1 comp58393_c0_seq7
comp47798_c0_seq1 comp58397_c0_seq1
comp47798_c0_seq1 comp58861_c0_seq3
comp47798_c0_seq1 comp59129_c0_seq1
comp47798_c0_seq1 comp59219_c1_seq1
comp47798_c0_seq1 comp59300_c0_seq20
comp47798_c0_seq1 comp59339_c0_seq11
comp47798_c0_seq1 comp59479_c0_seq9
comp47798_c0_seq1 comp59537_c0_seq35
comp47798_c0_seq1 comp59629_c0_seq6
comp47798_c0_seq1 comp59773_c2_seq13
comp47798_c0_seq1 comp59987_c1_seq1
comp47798_c0_seq1 comp60158_c0_seq3
comp47798_c0_seq1 comp63552_c0_seq1
comp47819_c0_seq2 comp54644_c0_seq1
comp47854_c0_seq1 comp63261_c0_seq1
comp47862_c0_seq4 comp51898_c0_seq2
comp47862_c0_seq4 comp58341_c0_seq13
comp47869_c0_seq1 comp50202_c0_seq2
comp47869_c0_seq1 comp59167_c0_seq5
comp47878_c1_seq2 comp54119_c0_seq1
comp47878_c1_seq2 comp55347_c0_seq2
comp47878_c1_seq2 comp58694_c1_seq5
comp47881_c0_seq1 comp56809_c0_seq1
comp47916_c0_seq1 comp50178_c0_seq1
comp47916_c0_seq1 comp50913_c0_seq2
comp47916_c0_seq1 comp52208_c0_seq2
comp47916_c0_seq1 comp52938_c0_seq1
comp47916_c0_seq1 comp54035_c0_seq3
comp47916_c0_seq1 comp55770_c0_seq3
comp47916_c0_seq1 comp56809_c0_seq1
comp47916_c0_seq1 comp56829_c0_seq2
comp47916_c0_seq1 comp57909_c0_seq3
comp47916_c0_seq1 comp58393_c0_seq7
comp47916_c0_seq1 comp59300_c0_seq20
comp47923_c0_seq3 comp50363_c0_seq1
comp47923_c0_seq3 comp53185_c0_seq2
comp47923_c0_seq3 comp60086_c1_seq1
comp47926_c0_seq2 comp60096_c1_seq12
comp47935_c0_seq1 comp56008_c4_seq1
comp47947_c0_seq4 comp48223_c0_seq3
comp47948_c0_seq1 comp59748_c0_seq1
comp47950_c0_seq1 comp51851_c0_seq2
comp47967_c0_seq1 comp52068_c0_seq3
comp47979_c0_seq2 comp50178_c0_seq1
comp47979_c0_seq2 comp50548_c0_seq1
comp47979_c0_seq2 comp51313_c0_seq1
comp47979_c0_seq2 comp52068_c0_seq3
comp47979_c0_seq2 comp52075_c0_seq1
comp47979_c0_seq2 comp55030_c0_seq1
comp47979_c0_seq2 comp55263_c1_seq2
comp47979_c0_seq2 comp56526_c1_seq5
comp47979_c0_seq2 comp57552_c0_seq4
comp47979_c0_seq2 comp57909_c0_seq3
comp47979_c0_seq2 comp58794_c0_seq3
comp47979_c0_seq2 comp58859_c0_seq17
comp47979_c0_seq2 comp59227_c0_seq2
comp47979_c0_seq2 comp59328_c0_seq1
comp47979_c0_seq2 comp59650_c1_seq1
comp47982_c0_seq3 comp58393_c0_seq7
comp47982_c0_seq3 comp59300_c0_seq20
comp47982_c0_seq3 comp60533_c0_seq1
comp47990_c0_seq1 comp57615_c0_seq3
comp47992_c0_seq1 comp53391_c0_seq2
comp47992_c0_seq1 comp54084_c0_seq3
comp47992_c0_seq1 comp57602_c0_seq14
comp47992_c0_seq1 comp58210_c0_seq4
comp47992_c0_seq1 comp58926_c2_seq3
comp47997_c0_seq3 comp48557_c0_seq1
comp47997_c0_seq3 comp51426_c0_seq9
comp47997_c0_seq3 comp52258_c0_seq2
comp47997_c0_seq3 comp52540_c1_seq2
comp47997_c0_seq3 comp52776_c0_seq2
comp47997_c0_seq3 comp53237_c0_seq2
comp47997_c0_seq3 comp53999_c0_seq3
comp47997_c0_seq3 comp54559_c0_seq2
comp47997_c0_seq3 comp55700_c0_seq1
comp47997_c0_seq3 comp56084_c0_seq2
comp47997_c0_seq3 comp56101_c0_seq6
comp47997_c0_seq3 comp56536_c0_seq1
comp47997_c0_seq3 comp56692_c0_seq2
comp47997_c0_seq3 comp57227_c0_seq4
comp47997_c0_seq3 comp57972_c0_seq1
comp47997_c0_seq3 comp58464_c0_seq2
comp47997_c0_seq3 comp58714_c0_seq8
comp47997_c0_seq3 comp88082_c0_seq1
comp48010_c0_seq1 comp49506_c0_seq1
comp48010_c0_seq1 comp49614_c0_seq3
comp48010_c0_seq1 comp50178_c0_seq1
comp48010_c0_seq1 comp50345_c0_seq1
comp48010_c0_seq1 comp51983_c0_seq1
comp48010_c0_seq1 comp52208_c0_seq2
comp48010_c0_seq1 comp52677_c0_seq2
comp48010_c0_seq1 comp53050_c0_seq1
comp48010_c0_seq1 comp54035_c0_seq3
comp48010_c0_seq1 comp55030_c0_seq1
comp48010_c0_seq1 comp55077_c0_seq1
comp48010_c0_seq1 comp55263_c1_seq2
comp48010_c0_seq1 comp55298_c0_seq6
comp48010_c0_seq1 comp55714_c0_seq1
comp48010_c0_seq1 comp55770_c0_seq3
comp48010_c0_seq1 comp55899_c0_seq3
comp48010_c0_seq1 comp56152_c0_seq2
comp48010_c0_seq1 comp56266_c3_seq8
comp48010_c0_seq1 comp56355_c0_seq1
comp48010_c0_seq1 comp56523_c0_seq29
comp48010_c0_seq1 comp56554_c0_seq2
comp48010_c0_seq1 comp56565_c0_seq2
comp48010_c0_seq1 comp56809_c0_seq1
comp48010_c0_seq1 comp56811_c0_seq12
comp48010_c0_seq1 comp56829_c0_seq2
comp48010_c0_seq1 comp56833_c0_seq2
comp48010_c0_seq1 comp57123_c0_seq5
comp48010_c0_seq1 comp57552_c0_seq4
comp48010_c0_seq1 comp57615_c0_seq3
comp48010_c0_seq1 comp57672_c0_seq1
comp48010_c0_seq1 comp57909_c0_seq3
comp48010_c0_seq1 comp57912_c2_seq2
comp48010_c0_seq1 comp58354_c0_seq3
comp48010_c0_seq1 comp58397_c0_seq1
comp48010_c0_seq1 comp58862_c0_seq3
comp48010_c0_seq1 comp59001_c0_seq5
comp48010_c0_seq1 comp59105_c0_seq2
comp48010_c0_seq1 comp59339_c0_seq11
comp48010_c0_seq1 comp59376_c0_seq20
comp48021_c0_seq1 comp56977_c2_seq2
comp48032_c0_seq2 comp52068_c0_seq3
comp48032_c0_seq2 comp54503_c0_seq1
comp48032_c0_seq2 comp56526_c1_seq5
comp48032_c0_seq2 comp57384_c0_seq4
comp48032_c0_seq2 comp57634_c2_seq2
comp48032_c0_seq2 comp58061_c0_seq7
comp48032_c0_seq2 comp59157_c1_seq1
comp48045_c0_seq1 comp50178_c0_seq1
comp48045_c0_seq1 comp50315_c0_seq3
comp48045_c0_seq1 comp52677_c0_seq2
comp48045_c0_seq1 comp52730_c0_seq1
comp48045_c0_seq1 comp56523_c0_seq29
comp48045_c0_seq1 comp56809_c0_seq1
comp48045_c0_seq1 comp57123_c0_seq5
comp48045_c0_seq1 comp57782_c3_seq4
comp48045_c0_seq1 comp57909_c0_seq3
comp48052_c0_seq4 comp48416_c0_seq1
comp48052_c0_seq4 comp50178_c0_seq1
comp48052_c0_seq4 comp50913_c0_seq2
comp48052_c0_seq4 comp53102_c0_seq1
comp48052_c0_seq4 comp54035_c0_seq3
comp48052_c0_seq4 comp56829_c0_seq2
comp48052_c0_seq4 comp57615_c0_seq3
comp48052_c0_seq4 comp57696_c3_seq4
comp48052_c0_seq4 comp57909_c0_seq3
comp48059_c0_seq2 comp49846_c0_seq2
comp48059_c0_seq2 comp54912_c0_seq1
comp48059_c0_seq2 comp58244_c0_seq2
comp48059_c0_seq2 comp59658_c2_seq3
comp48076_c0_seq2 comp48557_c0_seq1
comp48076_c0_seq2 comp52258_c0_seq2
comp48076_c0_seq2 comp53237_c0_seq2
comp48076_c0_seq2 comp54559_c0_seq2
comp48076_c0_seq2 comp56084_c0_seq2
comp48112_c0_seq4 comp48557_c0_seq1
comp48112_c0_seq4 comp52258_c0_seq2
comp48112_c0_seq4 comp53237_c0_seq2
comp48112_c0_seq4 comp54559_c0_seq2
comp48112_c0_seq4 comp56084_c0_seq2
comp48118_c0_seq6 comp52068_c0_seq3
comp48118_c0_seq6 comp56526_c1_seq5
comp48122_c2_seq2 comp57919_c0_seq11
comp48135_c0_seq1 comp49428_c0_seq2
comp48135_c0_seq1 comp52977_c0_seq2
comp48154_c0_seq1 comp51827_c0_seq1
comp48154_c0_seq1 comp54580_c0_seq2
comp48154_c0_seq1 comp55237_c0_seq1
comp48154_c0_seq1 comp56287_c1_seq2
comp48154_c0_seq1 comp57746_c0_seq1
comp48154_c0_seq1 comp57829_c0_seq1
comp48160_c0_seq1 comp49904_c0_seq1
comp48160_c0_seq1 comp50155_c0_seq3
comp48160_c0_seq1 comp50574_c0_seq1
comp48160_c0_seq1 comp52368_c0_seq11
comp48160_c0_seq1 comp56008_c4_seq1
comp48160_c0_seq1 comp58724_c0_seq2
comp48160_c0_seq1 comp60981_c0_seq1
comp48171_c0_seq1 comp49609_c0_seq1
comp48177_c0_seq4 comp51722_c0_seq1
comp48177_c0_seq4 comp52390_c0_seq2
comp48181_c0_seq2 comp59219_c1_seq1
comp48183_c0_seq1 comp56809_c0_seq1
comp48194_c0_seq1 comp58553_c1_seq3
comp48216_c0_seq1 comp48331_c0_seq1
comp48216_c0_seq1 comp54211_c1_seq1
comp48216_c0_seq1 comp54325_c0_seq1
comp48216_c0_seq1 comp54644_c0_seq1
comp48216_c0_seq1 comp56070_c0_seq14
comp48216_c0_seq1 comp62047_c0_seq1
comp48223_c0_seq3 comp49406_c1_seq1
comp48223_c0_seq3 comp50278_c0_seq1
comp48223_c0_seq3 comp50536_c0_seq3
comp48223_c0_seq3 comp50573_c0_seq1
comp48223_c0_seq3 comp50751_c0_seq1
comp48223_c0_seq3 comp53344_c0_seq2
comp48223_c0_seq3 comp54217_c0_seq2
comp48223_c0_seq3 comp55395_c0_seq1
comp48223_c0_seq3 comp55820_c0_seq1
comp48223_c0_seq3 comp55992_c0_seq3
comp48223_c0_seq3 comp57551_c0_seq1
comp48223_c0_seq3 comp57824_c0_seq1
comp48223_c0_seq3 comp57880_c0_seq2
comp48223_c0_seq3 comp58384_c0_seq10
comp48223_c0_seq3 comp59443_c0_seq6
comp48223_c0_seq3 comp59570_c0_seq1
comp48223_c0_seq3 comp59759_c0_seq2
comp48240_c0_seq2 comp58900_c0_seq6
comp48247_c0_seq1 comp59021_c0_seq13
comp48268_c0_seq2 comp49609_c0_seq1
comp48268_c0_seq2 comp52031_c0_seq2
comp48268_c0_seq2 comp52501_c0_seq1
comp48298_c0_seq2 comp48345_c0_seq4
comp4830_c0_seq1 comp53046_c0_seq1
comp4830_c0_seq1 comp55588_c0_seq7
comp4830_c0_seq1 comp55596_c0_seq2
comp4830_c0_seq1 comp56885_c2_seq5
comp48331_c0_seq1 comp48875_c0_seq1
comp48331_c0_seq1 comp49373_c0_seq1
comp48331_c0_seq1 comp51206_c1_seq6
comp48331_c0_seq1 comp52562_c0_seq2
comp48331_c0_seq1 comp55206_c1_seq1
comp48331_c0_seq1 comp56732_c0_seq2
comp48331_c0_seq1 comp59607_c0_seq10
comp48331_c0_seq1 comp60161_c0_seq1
comp48331_c0_seq1 comp60533_c0_seq1
comp48331_c0_seq1 comp60537_c0_seq1
comp48339_c0_seq2 comp59339_c0_seq11
comp48349_c1_seq1 comp54599_c0_seq3
comp48349_c1_seq1 comp56103_c0_seq11
comp48353_c0_seq2 comp53328_c0_seq4
comp48353_c0_seq2 comp58476_c0_seq20
comp48353_c0_seq2 comp59012_c0_seq9
comp48353_c0_seq2 comp60083_c0_seq2
comp48365_c0_seq2 comp52659_c0_seq8
comp48416_c0_seq1 comp55681_c0_seq1
comp48416_c0_seq1 comp57696_c3_seq4
comp4842_c0_seq1 comp54580_c0_seq2
comp4842_c0_seq1 comp59034_c7_seq2
comp48423_c0_seq2 comp48796_c0_seq3
comp48423_c0_seq2 comp53864_c0_seq3
comp48433_c0_seq1 comp50155_c0_seq3
comp48433_c0_seq1 comp50948_c0_seq1
comp48433_c0_seq1 comp52795_c0_seq2
comp48433_c0_seq1 comp60981_c0_seq1
comp48441_c0_seq1 comp57717_c0_seq1
comp48441_c0_seq1 comp7195_c0_seq1
comp48515_c0_seq1 comp56390_c0_seq2
comp48517_c0_seq2 comp57919_c0_seq11
comp48545_c0_seq1 comp48597_c0_seq2
comp48545_c0_seq1 comp50730_c0_seq3
comp48545_c0_seq1 comp52958_c0_seq1
comp48545_c0_seq1 comp54717_c0_seq4
comp48547_c0_seq1 comp48729_c0_seq1
comp48547_c0_seq1 comp52136_c0_seq1
comp48547_c0_seq1 comp56297_c0_seq2
comp48547_c0_seq1 comp57148_c0_seq3
comp48547_c0_seq1 comp57260_c0_seq12
comp48547_c0_seq1 comp57625_c1_seq31
comp48547_c0_seq1 comp58770_c0_seq8
comp48547_c0_seq1 comp58824_c1_seq21
comp48547_c0_seq1 comp59497_c0_seq12
comp48557_c0_seq1 comp48597_c0_seq2
comp48557_c0_seq1 comp48812_c0_seq1
comp48557_c0_seq1 comp48839_c0_seq1
comp48557_c0_seq1 comp49105_c0_seq1
comp48557_c0_seq1 comp49179_c0_seq1
comp48557_c0_seq1 comp49353_c0_seq2
comp48557_c0_seq1 comp49406_c1_seq1
comp48557_c0_seq1 comp49497_c0_seq5
comp48557_c0_seq1 comp49825_c0_seq1
comp48557_c0_seq1 comp49846_c0_seq2
comp48557_c0_seq1 comp50161_c0_seq1
comp48557_c0_seq1 comp50172_c2_seq1
comp48557_c0_seq1 comp50178_c0_seq1
comp48557_c0_seq1 comp50598_c0_seq1
comp48557_c0_seq1 comp50917_c0_seq1
comp48557_c0_seq1 comp50963_c0_seq1
comp48557_c0_seq1 comp51291_c0_seq1
comp48557_c0_seq1 comp51426_c0_seq9
comp48557_c0_seq1 comp51582_c0_seq1
comp48557_c0_seq1 comp51761_c0_seq1
comp48557_c0_seq1 comp51827_c0_seq1
comp48557_c0_seq1 comp51869_c0_seq1
comp48557_c0_seq1 comp52258_c0_seq2
comp48557_c0_seq1 comp52273_c0_seq2
comp48557_c0_seq1 comp52403_c0_seq2
comp48557_c0_seq1 comp52414_c0_seq1
comp48557_c0_seq1 comp52474_c0_seq3
comp48557_c0_seq1 comp52478_c0_seq3
comp48557_c0_seq1 comp52540_c1_seq2
comp48557_c0_seq1 comp52588_c0_seq1
comp48557_c0_seq1 comp52700_c1_seq3
comp48557_c0_seq1 comp52714_c0_seq1
comp48557_c0_seq1 comp52745_c0_seq1
comp48557_c0_seq1 comp52755_c2_seq1
comp48557_c0_seq1 comp52955_c0_seq2
comp48557_c0_seq1 comp53237_c0_seq2
comp48557_c0_seq1 comp53335_c0_seq5
comp48557_c0_seq1 comp53353_c0_seq2
comp48557_c0_seq1 comp53452_c0_seq2
comp48557_c0_seq1 comp53870_c0_seq5
comp48557_c0_seq1 comp53944_c0_seq2
comp48557_c0_seq1 comp54003_c0_seq1
comp48557_c0_seq1 comp54035_c0_seq3
comp48557_c0_seq1 comp54149_c0_seq1
comp48557_c0_seq1 comp54217_c0_seq2
comp48557_c0_seq1 comp54424_c0_seq2
comp48557_c0_seq1 comp54477_c0_seq3
comp48557_c0_seq1 comp54559_c0_seq2
comp48557_c0_seq1 comp54771_c0_seq1
comp48557_c0_seq1 comp54813_c0_seq1
comp48557_c0_seq1 comp54877_c0_seq2
comp48557_c0_seq1 comp55030_c0_seq1
comp48557_c0_seq1 comp55225_c0_seq2
comp48557_c0_seq1 comp55231_c0_seq2
comp48557_c0_seq1 comp55237_c0_seq1
comp48557_c0_seq1 comp55263_c1_seq2
comp48557_c0_seq1 comp55318_c0_seq2
comp48557_c0_seq1 comp55541_c0_seq2
comp48557_c0_seq1 comp55602_c0_seq2
comp48557_c0_seq1 comp55700_c0_seq1
comp48557_c0_seq1 comp55732_c0_seq5
comp48557_c0_seq1 comp55764_c0_seq2
comp48557_c0_seq1 comp55820_c0_seq1
comp48557_c0_seq1 comp56084_c0_seq2
comp48557_c0_seq1 comp56158_c0_seq1
comp48557_c0_seq1 comp56287_c1_seq2
comp48557_c0_seq1 comp56372_c0_seq2
comp48557_c0_seq1 comp56380_c1_seq24
comp48557_c0_seq1 comp56427_c1_seq1
comp48557_c0_seq1 comp56489_c0_seq14
comp48557_c0_seq1 comp56536_c0_seq1
comp48557_c0_seq1 comp56620_c2_seq4
comp48557_c0_seq1 comp56688_c0_seq4
comp48557_c0_seq1 comp56739_c0_seq3
comp48557_c0_seq1 comp56759_c0_seq4
comp48557_c0_seq1 comp56762_c3_seq1
comp48557_c0_seq1 comp56794_c0_seq1
comp48557_c0_seq1 comp56798_c0_seq6
comp48557_c0_seq1 comp56861_c0_seq2
comp48557_c0_seq1 comp56916_c0_seq1
comp48557_c0_seq1 comp56930_c0_seq3
comp48557_c0_seq1 comp57017_c0_seq2
comp48557_c0_seq1 comp57069_c0_seq3
comp48557_c0_seq1 comp57097_c1_seq1
comp48557_c0_seq1 comp57109_c0_seq1
comp48557_c0_seq1 comp57149_c0_seq4
comp48557_c0_seq1 comp57210_c0_seq2
comp48557_c0_seq1 comp57226_c1_seq1
comp48557_c0_seq1 comp57227_c0_seq4
comp48557_c0_seq1 comp57237_c0_seq80
comp48557_c0_seq1 comp57239_c1_seq1
comp48557_c0_seq1 comp57292_c1_seq2
comp48557_c0_seq1 comp57434_c1_seq25
comp48557_c0_seq1 comp57540_c0_seq3
comp48557_c0_seq1 comp57552_c0_seq4
comp48557_c0_seq1 comp57609_c0_seq1
comp48557_c0_seq1 comp57612_c0_seq2
comp48557_c0_seq1 comp57627_c1_seq6
comp48557_c0_seq1 comp57649_c0_seq12
comp48557_c0_seq1 comp57664_c1_seq5
comp48557_c0_seq1 comp57683_c1_seq15
comp48557_c0_seq1 comp57747_c0_seq14
comp48557_c0_seq1 comp57829_c0_seq1
comp48557_c0_seq1 comp57861_c0_seq1
comp48557_c0_seq1 comp57876_c0_seq3
comp48557_c0_seq1 comp57909_c0_seq3
comp48557_c0_seq1 comp57910_c0_seq11
comp48557_c0_seq1 comp57972_c0_seq1
comp48557_c0_seq1 comp58194_c0_seq13
comp48557_c0_seq1 comp58387_c2_seq2
comp48557_c0_seq1 comp58396_c0_seq2
comp48557_c0_seq1 comp58604_c0_seq1
comp48557_c0_seq1 comp58623_c0_seq4
comp48557_c0_seq1 comp58719_c0_seq2
comp48557_c0_seq1 comp58819_c0_seq2
comp48557_c0_seq1 comp58992_c0_seq4
comp48557_c0_seq1 comp59014_c0_seq3
comp48557_c0_seq1 comp59027_c3_seq2
comp48557_c0_seq1 comp59120_c0_seq2
comp48557_c0_seq1 comp59167_c0_seq5
comp48557_c0_seq1 comp59185_c0_seq3
comp48557_c0_seq1 comp59253_c2_seq41
comp48557_c0_seq1 comp59262_c0_seq1
comp48557_c0_seq1 comp59381_c0_seq50
comp48557_c0_seq1 comp59386_c0_seq19
comp48557_c0_seq1 comp59399_c0_seq20
comp48557_c0_seq1 comp59439_c0_seq3
comp48557_c0_seq1 comp59548_c0_seq8
comp48557_c0_seq1 comp59562_c0_seq32
comp48557_c0_seq1 comp59572_c0_seq3
comp48557_c0_seq1 comp59583_c0_seq2
comp48557_c0_seq1 comp59601_c0_seq5
comp48557_c0_seq1 comp59647_c0_seq6
comp48557_c0_seq1 comp59748_c0_seq1
comp48557_c0_seq1 comp59757_c1_seq5
comp48557_c0_seq1 comp59786_c0_seq2
comp48557_c0_seq1 comp59815_c0_seq3
comp48557_c0_seq1 comp59822_c0_seq6
comp48557_c0_seq1 comp59868_c0_seq3
comp48557_c0_seq1 comp59875_c1_seq8
comp48557_c0_seq1 comp59942_c0_seq2
comp48557_c0_seq1 comp59986_c0_seq1
comp48557_c0_seq1 comp59987_c0_seq2
comp48557_c0_seq1 comp60007_c0_seq12
comp48557_c0_seq1 comp60080_c1_seq1
comp48557_c0_seq1 comp60091_c0_seq2
comp48557_c0_seq1 comp61454_c0_seq1
comp48557_c0_seq1 comp97705_c0_seq1
comp48597_c0_seq2 comp50730_c0_seq3
comp48597_c0_seq2 comp51578_c0_seq1
comp48597_c0_seq2 comp52258_c0_seq2
comp48597_c0_seq2 comp52958_c0_seq1
comp48597_c0_seq2 comp53237_c0_seq2
comp48597_c0_seq2 comp53905_c0_seq3
comp48597_c0_seq2 comp54559_c0_seq2
comp48597_c0_seq2 comp54717_c0_seq4
comp48597_c0_seq2 comp55873_c3_seq1
comp48597_c0_seq2 comp56084_c0_seq2
comp48597_c0_seq2 comp59625_c0_seq6
comp48597_c0_seq2 comp59800_c1_seq8
comp48618_c0_seq2 comp56442_c0_seq4
comp48638_c0_seq2 comp58337_c1_seq31
comp48639_c0_seq1 comp54580_c0_seq2
comp48669_c0_seq2 comp53767_c0_seq2
comp48669_c0_seq2 comp56939_c2_seq7
comp48722_c0_seq1 comp54222_c0_seq2
comp48725_c0_seq2 comp59027_c3_seq2
comp48729_c0_seq1 comp52413_c0_seq3
comp48729_c0_seq1 comp52487_c0_seq1
comp48729_c0_seq1 comp52913_c0_seq1
comp48729_c0_seq1 comp54858_c0_seq2
comp48729_c0_seq1 comp56404_c3_seq10
comp48729_c0_seq1 comp57067_c0_seq3
comp48729_c0_seq1 comp57304_c0_seq5
comp48729_c0_seq1 comp57883_c0_seq6
comp48729_c0_seq1 comp58069_c0_seq22
comp48729_c0_seq1 comp59257_c0_seq7
comp48729_c0_seq1 comp60146_c0_seq7
comp48732_c0_seq1 comp48997_c0_seq1
comp48732_c0_seq1 comp50943_c0_seq2
comp48732_c0_seq1 comp54107_c0_seq2
comp48732_c0_seq1 comp56282_c0_seq2
comp48732_c0_seq1 comp59994_c0_seq8
comp48745_c0_seq1 comp53058_c0_seq1
comp48745_c0_seq1 comp59219_c1_seq1
comp48752_c0_seq3 comp56541_c0_seq1
comp48760_c0_seq1 comp49410_c1_seq1
comp48780_c0_seq2 comp49681_c0_seq1
comp48780_c0_seq2 comp54888_c0_seq3
comp48780_c0_seq2 comp56663_c1_seq20
comp48780_c0_seq2 comp56965_c1_seq3
comp48780_c0_seq2 comp57190_c1_seq4
comp48780_c0_seq2 comp58221_c0_seq7
comp48780_c0_seq2 comp58572_c0_seq1
comp48780_c0_seq2 comp60005_c0_seq10
comp48801_c0_seq3 comp51993_c0_seq6
comp48801_c0_seq3 comp53814_c0_seq16
comp48801_c0_seq3 comp56009_c0_seq1
comp48801_c0_seq3 comp56556_c0_seq19
comp48801_c0_seq3 comp58103_c0_seq3
comp48801_c0_seq3 comp59339_c0_seq11
comp48812_c0_seq1 comp52258_c0_seq2
comp48812_c0_seq1 comp53237_c0_seq2
comp48812_c0_seq1 comp54559_c0_seq2
comp48812_c0_seq1 comp56084_c0_seq2
comp48839_c0_seq1 comp52258_c0_seq2
comp48839_c0_seq1 comp52588_c0_seq1
comp48839_c0_seq1 comp53237_c0_seq2
comp48839_c0_seq1 comp54003_c0_seq1
comp48839_c0_seq1 comp54559_c0_seq2
comp48839_c0_seq1 comp54580_c0_seq2
comp48839_c0_seq1 comp56084_c0_seq2
comp48839_c0_seq1 comp57664_c1_seq5
comp48839_c0_seq1 comp59082_c2_seq12
comp48839_c0_seq1 comp97705_c0_seq1
comp48847_c0_seq1 comp54580_c0_seq2
comp48858_c0_seq4 comp49314_c0_seq4
comp48858_c0_seq4 comp51995_c0_seq2
comp48858_c0_seq4 comp54765_c0_seq1
comp48858_c0_seq4 comp55354_c0_seq3
comp48858_c0_seq4 comp56579_c1_seq6
comp48875_c0_seq1 comp55206_c1_seq1
comp48877_c0_seq1 comp54580_c0_seq2
comp48879_c0_seq1 comp51867_c0_seq1
comp48879_c0_seq1 comp59027_c3_seq2
comp48879_c0_seq1 comp86063_c0_seq1
comp48912_c0_seq2 comp51526_c0_seq6
comp48912_c0_seq2 comp53916_c0_seq1
comp48912_c0_seq2 comp55630_c0_seq1
comp48912_c0_seq2 comp56282_c0_seq2
comp48930_c0_seq2 comp54580_c0_seq2
comp48997_c0_seq1 comp49548_c0_seq3
comp48997_c0_seq1 comp49609_c0_seq1
comp48997_c0_seq1 comp49670_c0_seq1
comp48997_c0_seq1 comp50421_c0_seq1
comp48997_c0_seq1 comp51526_c0_seq6
comp48997_c0_seq1 comp52110_c0_seq1
comp48997_c0_seq1 comp53376_c0_seq1
comp48997_c0_seq1 comp53900_c0_seq1
comp48997_c0_seq1 comp53916_c0_seq1
comp48997_c0_seq1 comp54302_c0_seq2
comp48997_c0_seq1 comp54580_c0_seq2
comp48997_c0_seq1 comp54736_c1_seq2
comp48997_c0_seq1 comp54868_c0_seq2
comp48997_c0_seq1 comp55379_c1_seq2
comp48997_c0_seq1 comp56083_c0_seq2
comp48997_c0_seq1 comp56187_c0_seq4
comp48997_c0_seq1 comp56282_c0_seq2
comp48997_c0_seq1 comp56346_c0_seq2
comp48997_c0_seq1 comp56385_c0_seq2
comp48997_c0_seq1 comp57847_c0_seq5
comp48997_c0_seq1 comp58157_c0_seq2
comp48997_c0_seq1 comp59027_c3_seq2
comp48997_c0_seq1 comp59994_c0_seq8
comp49005_c0_seq1 comp54336_c0_seq8
comp49028_c0_seq5 comp55258_c3_seq2
comp49031_c1_seq1 comp55779_c0_seq2
comp49031_c1_seq1 comp56015_c3_seq1
comp49031_c1_seq1 comp57300_c0_seq2
comp49031_c1_seq1 comp58146_c0_seq14
comp49031_c1_seq1 comp59082_c2_seq12
comp49031_c1_seq1 comp59978_c0_seq4
comp49052_c0_seq2 comp53960_c0_seq3
comp49052_c0_seq2 comp55039_c0_seq2
comp49052_c0_seq2 comp59680_c2_seq4
comp49052_c0_seq2 comp59715_c0_seq9
comp49066_c1_seq1 comp52437_c0_seq1
comp49066_c1_seq1 comp54809_c0_seq1
comp49066_c1_seq1 comp55654_c1_seq27
comp49066_c1_seq1 comp57248_c0_seq1
comp49066_c1_seq1 comp58073_c0_seq1
comp49066_c1_seq1 comp58844_c0_seq16
comp49066_c1_seq1 comp59038_c0_seq3
comp49066_c1_seq1 comp59370_c0_seq1
comp49066_c1_seq1 comp59973_c0_seq6
comp49075_c0_seq1 comp54580_c0_seq2
comp49105_c0_seq1 comp52258_c0_seq2
comp49105_c0_seq1 comp53237_c0_seq2
comp49105_c0_seq1 comp54559_c0_seq2
comp49105_c0_seq1 comp54798_c0_seq1
comp49105_c0_seq1 comp56084_c0_seq2
comp49128_c0_seq2 comp50548_c0_seq1
comp49128_c0_seq2 comp50886_c0_seq8
comp49128_c0_seq2 comp52068_c0_seq3
comp49128_c0_seq2 comp52470_c0_seq1
comp49128_c0_seq2 comp53177_c0_seq2
comp49128_c0_seq2 comp54503_c0_seq1
comp49128_c0_seq2 comp56526_c1_seq5
comp49128_c0_seq2 comp57384_c0_seq4
comp49128_c0_seq2 comp57634_c2_seq2
comp49128_c0_seq2 comp58061_c0_seq7
comp49128_c0_seq2 comp58157_c0_seq2
comp49128_c0_seq2 comp58794_c0_seq3
comp49128_c0_seq2 comp59157_c1_seq1
comp49128_c0_seq2 comp59328_c0_seq1
comp49144_c0_seq1 comp53958_c0_seq2
comp49144_c0_seq1 comp57972_c0_seq1
comp49146_c0_seq1 comp50178_c0_seq1
comp49146_c0_seq1 comp54580_c0_seq2
comp49146_c0_seq1 comp55030_c0_seq1
comp49146_c0_seq1 comp55263_c1_seq2
comp49146_c0_seq1 comp57552_c0_seq4
comp49146_c0_seq1 comp57909_c0_seq3
comp49150_c0_seq1 comp53960_c0_seq3
comp49150_c0_seq1 comp59680_c2_seq4
comp49150_c0_seq1 comp59715_c0_seq9
comp49151_c0_seq1 comp50094_c0_seq1
comp49158_c0_seq3 comp52870_c0_seq1
comp49158_c0_seq3 comp55702_c0_seq2
comp49158_c0_seq3 comp56804_c0_seq1
comp49177_c0_seq1 comp54912_c0_seq1
comp49177_c0_seq1 comp58244_c0_seq2
comp49177_c0_seq1 comp59658_c2_seq3
comp49179_c0_seq1 comp49373_c0_seq1
comp49179_c0_seq1 comp52258_c0_seq2
comp49179_c0_seq1 comp53237_c0_seq2
comp49179_c0_seq1 comp54559_c0_seq2
comp49179_c0_seq1 comp55681_c0_seq1
comp49179_c0_seq1 comp56084_c0_seq2
comp49179_c0_seq1 comp59138_c0_seq2
comp49179_c0_seq1 comp60161_c0_seq1
comp49179_c0_seq1 comp60533_c0_seq1
comp49179_c0_seq1 comp60537_c0_seq1
comp49184_c1_seq1 comp53409_c0_seq23
comp49184_c1_seq1 comp53897_c0_seq3
comp49184_c1_seq1 comp54740_c0_seq2
comp49193_c0_seq2 comp54912_c0_seq1
comp49193_c0_seq2 comp58244_c0_seq2
comp49193_c0_seq2 comp59658_c2_seq3
comp49212_c0_seq2 comp50968_c0_seq1
comp49212_c0_seq2 comp54830_c0_seq1
comp49212_c0_seq2 comp59182_c0_seq2
comp49241_c0_seq1 comp56804_c0_seq1
comp49265_c0_seq3 comp50178_c0_seq1
comp49265_c0_seq3 comp54580_c0_seq2
comp49265_c0_seq3 comp55030_c0_seq1
comp49265_c0_seq3 comp55263_c1_seq2
comp49265_c0_seq3 comp57552_c0_seq4
comp49265_c0_seq3 comp57909_c0_seq3
comp49274_c0_seq1 comp49904_c0_seq1
comp49274_c0_seq1 comp50155_c0_seq3
comp49274_c0_seq1 comp50948_c0_seq1
comp49274_c0_seq1 comp51792_c0_seq2
comp49274_c0_seq1 comp52368_c0_seq11
comp49274_c0_seq1 comp52795_c0_seq2
comp49274_c0_seq1 comp53051_c0_seq5
comp49274_c0_seq1 comp53526_c1_seq3
comp49274_c0_seq1 comp60981_c0_seq1
comp49280_c0_seq6 comp57017_c0_seq2
comp49291_c1_seq1 comp54580_c0_seq2
comp49298_c0_seq1 comp59028_c1_seq4
comp49304_c0_seq2 comp54580_c0_seq2
comp49314_c0_seq4 comp50007_c0_seq1
comp49314_c0_seq4 comp52778_c0_seq2
comp49314_c0_seq4 comp53955_c0_seq2
comp49314_c0_seq4 comp54765_c0_seq1
comp49314_c0_seq4 comp54908_c4_seq13
comp49314_c0_seq4 comp55286_c0_seq11
comp49314_c0_seq4 comp55354_c0_seq3
comp49314_c0_seq4 comp55711_c0_seq1
comp49314_c0_seq4 comp56579_c1_seq6
comp49314_c0_seq4 comp57800_c0_seq7
comp49314_c0_seq4 comp58162_c0_seq27
comp49314_c0_seq4 comp59568_c4_seq8
comp49324_c0_seq1 comp54580_c0_seq2
comp49334_c1_seq5 comp51043_c0_seq2
comp49334_c1_seq5 comp55850_c0_seq2
comp49353_c0_seq2 comp52258_c0_seq2
comp49353_c0_seq2 comp53237_c0_seq2
comp49353_c0_seq2 comp54559_c0_seq2
comp49353_c0_seq2 comp56084_c0_seq2
comp49373_c0_seq1 comp51206_c1_seq6
comp49373_c0_seq1 comp52562_c0_seq2
comp49373_c0_seq1 comp54580_c0_seq2
comp49373_c0_seq1 comp59138_c0_seq2
comp49373_c0_seq1 comp60537_c0_seq1
comp49393_c0_seq1 comp59742_c0_seq7
comp49393_c0_seq1 comp9634_c0_seq1
comp49406_c1_seq1 comp52258_c0_seq2
comp49406_c1_seq1 comp53237_c0_seq2
comp49406_c1_seq1 comp54559_c0_seq2
comp49406_c1_seq1 comp56084_c0_seq2
comp49410_c1_seq1 comp49755_c0_seq3
comp49410_c1_seq1 comp50721_c0_seq1
comp49410_c1_seq1 comp52513_c0_seq1
comp49410_c1_seq1 comp52673_c0_seq1
comp49410_c1_seq1 comp54073_c0_seq1
comp49410_c1_seq1 comp55474_c1_seq1
comp49410_c1_seq1 comp55770_c0_seq3
comp49410_c1_seq1 comp56723_c0_seq1
comp49410_c1_seq1 comp56829_c0_seq2
comp49410_c1_seq1 comp56998_c0_seq6
comp49410_c1_seq1 comp57536_c0_seq3
comp49410_c1_seq1 comp58294_c0_seq1
comp49410_c1_seq1 comp58337_c1_seq31
comp49410_c1_seq1 comp59354_c0_seq7
comp49410_c1_seq1 comp59745_c0_seq12
comp49410_c1_seq1 comp59913_c0_seq12
comp49410_c1_seq1 comp59916_c0_seq1
comp49410_c1_seq1 comp59966_c0_seq1
comp49410_c1_seq1 comp60128_c0_seq2
comp49410_c1_seq1 comp60134_c0_seq10
comp49428_c0_seq2 comp51465_c0_seq1
comp49428_c0_seq2 comp51851_c0_seq2
comp49428_c0_seq2 comp54035_c0_seq3
comp49428_c0_seq2 comp56442_c0_seq4
comp49428_c0_seq2 comp56523_c0_seq29
comp49428_c0_seq2 comp56598_c0_seq9
comp49428_c0_seq2 comp56781_c0_seq35
comp49456_c0_seq1 comp55681_c0_seq1
comp49458_c0_seq10 comp58405_c0_seq9
comp49459_c0_seq1 comp50344_c0_seq3
comp49459_c0_seq1 comp53284_c0_seq2
comp49470_c1_seq2 comp50178_c0_seq1
comp49470_c1_seq2 comp50548_c0_seq1
comp49470_c1_seq2 comp51313_c0_seq1
comp49470_c1_seq2 comp52068_c0_seq3
comp49470_c1_seq2 comp52075_c0_seq1
comp49470_c1_seq2 comp55030_c0_seq1
comp49470_c1_seq2 comp55263_c1_seq2
comp49470_c1_seq2 comp56526_c1_seq5
comp49470_c1_seq2 comp57552_c0_seq4
comp49470_c1_seq2 comp57909_c0_seq3
comp49470_c1_seq2 comp58794_c0_seq3
comp49470_c1_seq2 comp58859_c0_seq17
comp49470_c1_seq2 comp59227_c0_seq2
comp49470_c1_seq2 comp59328_c0_seq1
comp49470_c1_seq2 comp59650_c1_seq1
comp49475_c1_seq1 comp52771_c0_seq1
comp49475_c1_seq1 comp54372_c0_seq18
comp49475_c1_seq1 comp55556_c0_seq1
comp49475_c1_seq1 comp55939_c0_seq3
comp49475_c1_seq1 comp56103_c0_seq11
comp49497_c0_seq5 comp52258_c0_seq2
comp49497_c0_seq5 comp53237_c0_seq2
comp49497_c0_seq5 comp54231_c0_seq11
comp49497_c0_seq5 comp54559_c0_seq2
comp49497_c0_seq5 comp54580_c0_seq2
comp49497_c0_seq5 comp56084_c0_seq2
comp49497_c0_seq5 comp57962_c0_seq3
comp49497_c0_seq5 comp58699_c2_seq13
comp49501_c0_seq2 comp56096_c0_seq3
comp49501_c0_seq2 comp57407_c1_seq1
comp49506_c0_seq1 comp52677_c0_seq2
comp49506_c0_seq1 comp56405_c0_seq3
comp49506_c0_seq1 comp56809_c0_seq1
comp49506_c0_seq1 comp57851_c0_seq33
comp49506_c0_seq1 comp58393_c0_seq7
comp49506_c0_seq1 comp59300_c0_seq20
comp49506_c0_seq1 comp59339_c0_seq11
comp49531_c0_seq1 comp53960_c0_seq3
comp49531_c0_seq1 comp59680_c2_seq4
comp49531_c0_seq1 comp59715_c0_seq9
comp49535_c0_seq3 comp56390_c0_seq2
comp49548_c0_seq3 comp50943_c0_seq2
comp49548_c0_seq3 comp54580_c0_seq2
comp49548_c0_seq3 comp54736_c1_seq2
comp49548_c0_seq3 comp54868_c0_seq2
comp49548_c0_seq3 comp56187_c0_seq4
comp49548_c0_seq3 comp56385_c0_seq2
comp49548_c0_seq3 comp59027_c3_seq2
comp49578_c0_seq1 comp50178_c0_seq1
comp49578_c0_seq1 comp55030_c0_seq1
comp49578_c0_seq1 comp55263_c1_seq2
comp49578_c0_seq1 comp56523_c0_seq29
comp49578_c0_seq1 comp57552_c0_seq4
comp49578_c0_seq1 comp57615_c0_seq3
comp49578_c0_seq1 comp57909_c0_seq3
comp49580_c0_seq1 comp55533_c0_seq10
comp49580_c0_seq1 comp56607_c0_seq1
comp49580_c0_seq1 comp58957_c0_seq7
comp49601_c0_seq1 comp50383_c0_seq2
comp49603_c0_seq1 comp52208_c0_seq2
comp49603_c0_seq1 comp56152_c0_seq2
comp49603_c0_seq1 comp56554_c0_seq2
comp49603_c0_seq1 comp56829_c0_seq2
comp49603_c0_seq1 comp59339_c0_seq11
comp49609_c0_seq1 comp50421_c0_seq1
comp49609_c0_seq1 comp50624_c0_seq2
comp49609_c0_seq1 comp50943_c0_seq2
comp49609_c0_seq1 comp51444_c0_seq1
comp49609_c0_seq1 comp52031_c0_seq2
comp49609_c0_seq1 comp53376_c0_seq1
comp49609_c0_seq1 comp53988_c0_seq2
comp49609_c0_seq1 comp54302_c0_seq2
comp49609_c0_seq1 comp54868_c0_seq2
comp49609_c0_seq1 comp55379_c1_seq2
comp49609_c0_seq1 comp56083_c0_seq2
comp49609_c0_seq1 comp56346_c0_seq2
comp49609_c0_seq1 comp56385_c0_seq2
comp49609_c0_seq1 comp68783_c0_seq1
comp49609_c0_seq1 comp73695_c0_seq1
comp49615_c0_seq2 comp54045_c0_seq3
comp49615_c0_seq2 comp54316_c0_seq5
comp49615_c0_seq2 comp54483_c0_seq2
comp49615_c0_seq2 comp55962_c0_seq2
comp49615_c0_seq2 comp57864_c0_seq1
comp49615_c0_seq2 comp58049_c1_seq1
comp49615_c0_seq2 comp58151_c1_seq2
comp49615_c0_seq2 comp59219_c1_seq1
comp49647_c0_seq1 comp53058_c0_seq1
comp49647_c0_seq1 comp53754_c0_seq2
comp49647_c0_seq1 comp54651_c0_seq6
comp49647_c0_seq1 comp55681_c0_seq1
comp49647_c0_seq1 comp56355_c0_seq1
comp49647_c0_seq1 comp56589_c0_seq1
comp49647_c0_seq1 comp57737_c1_seq1
comp49647_c0_seq1 comp59167_c0_seq5
comp49647_c0_seq1 comp59480_c0_seq2
comp49661_c0_seq1 comp50202_c0_seq2
comp49666_c0_seq2 comp52208_c0_seq2
comp49670_c0_seq1 comp50943_c0_seq2
comp49671_c0_seq2 comp51789_c0_seq4
comp49671_c0_seq2 comp56809_c0_seq1
comp49723_c0_seq1 comp50621_c0_seq1
comp49723_c0_seq1 comp53461_c0_seq3
comp49729_c0_seq2 comp51313_c0_seq1
comp49729_c0_seq2 comp53759_c0_seq1
comp49729_c0_seq2 comp59227_c0_seq2
comp49733_c0_seq1 comp52659_c0_seq8
comp49735_c0_seq1 comp49904_c0_seq1
comp49735_c0_seq1 comp50155_c0_seq3
comp49735_c0_seq1 comp50948_c0_seq1
comp49735_c0_seq1 comp51792_c0_seq2
comp49735_c0_seq1 comp52368_c0_seq11
comp49735_c0_seq1 comp52795_c0_seq2
comp49735_c0_seq1 comp53051_c0_seq5
comp49735_c0_seq1 comp59489_c1_seq1
comp49735_c0_seq1 comp60981_c0_seq1
comp49755_c0_seq3 comp59745_c0_seq12
comp49761_c0_seq1 comp50421_c0_seq1
comp49761_c0_seq1 comp51526_c0_seq6
comp49761_c0_seq1 comp51658_c0_seq1
comp49761_c0_seq1 comp52358_c0_seq3
comp49761_c0_seq1 comp53988_c0_seq2
comp49761_c0_seq1 comp54172_c1_seq4
comp49761_c0_seq1 comp54679_c0_seq1
comp49761_c0_seq1 comp55138_c0_seq1
comp49761_c0_seq1 comp56180_c0_seq1
comp49761_c0_seq1 comp59031_c0_seq28
comp49761_c0_seq1 comp59309_c1_seq3
comp49761_c0_seq1 comp64047_c0_seq1
comp49797_c0_seq1 comp54580_c0_seq2
comp49811_c0_seq1 comp58393_c0_seq7
comp49811_c0_seq1 comp59300_c0_seq20
comp49813_c1_seq7 comp52208_c0_seq2
comp49819_c0_seq1 comp55258_c3_seq2
comp49825_c0_seq1 comp52258_c0_seq2
comp49825_c0_seq1 comp52345_c0_seq1
comp49825_c0_seq1 comp53237_c0_seq2
comp49825_c0_seq1 comp53425_c0_seq1
comp49825_c0_seq1 comp54559_c0_seq2
comp49825_c0_seq1 comp55342_c0_seq5
comp49825_c0_seq1 comp55766_c0_seq9
comp49825_c0_seq1 comp56084_c0_seq2
comp49825_c0_seq1 comp57197_c0_seq4
comp49825_c0_seq1 comp57985_c0_seq2
comp49825_c0_seq1 comp58544_c0_seq1
comp49825_c0_seq1 comp59447_c0_seq33
comp49825_c0_seq1 comp59615_c0_seq91
comp49836_c0_seq1 comp56594_c0_seq3
comp49836_c0_seq1 comp56780_c0_seq1
comp49846_c0_seq2 comp52258_c0_seq2
comp49846_c0_seq2 comp52853_c0_seq1
comp49846_c0_seq2 comp53143_c0_seq1
comp49846_c0_seq2 comp53237_c0_seq2
comp49846_c0_seq2 comp53651_c0_seq1
comp49846_c0_seq2 comp54291_c1_seq1
comp49846_c0_seq2 comp54559_c0_seq2
comp49846_c0_seq2 comp55148_c0_seq4
comp49846_c0_seq2 comp56084_c0_seq2
comp49846_c0_seq2 comp56594_c0_seq3
comp49846_c0_seq2 comp56780_c0_seq1
comp49846_c0_seq2 comp57301_c1_seq1
comp49846_c0_seq2 comp59563_c1_seq11
comp49846_c0_seq2 comp59714_c2_seq2
comp49846_c0_seq2 comp6598_c0_seq1
comp49846_c0_seq2 comp834_c0_seq1
comp49848_c0_seq1 comp50178_c0_seq1
comp49848_c0_seq1 comp50548_c0_seq1
comp49848_c0_seq1 comp51313_c0_seq1
comp49848_c0_seq1 comp52068_c0_seq3
comp49848_c0_seq1 comp52075_c0_seq1
comp49848_c0_seq1 comp55030_c0_seq1
comp49848_c0_seq1 comp55263_c1_seq2
comp49848_c0_seq1 comp56526_c1_seq5
comp49848_c0_seq1 comp57552_c0_seq4
comp49848_c0_seq1 comp57909_c0_seq3
comp49848_c0_seq1 comp58794_c0_seq3
comp49848_c0_seq1 comp58859_c0_seq17
comp49848_c0_seq1 comp59227_c0_seq2
comp49848_c0_seq1 comp59328_c0_seq1
comp49848_c0_seq1 comp59650_c1_seq1
comp49849_c0_seq1 comp58427_c0_seq2
comp49890_c0_seq1 comp52963_c0_seq5
comp49890_c0_seq1 comp55046_c0_seq1
comp49904_c0_seq1 comp50155_c0_seq3
comp49904_c0_seq1 comp51792_c0_seq2
comp49904_c0_seq1 comp52368_c0_seq11
comp49904_c0_seq1 comp53051_c0_seq5
comp49904_c0_seq1 comp53526_c1_seq3
comp49904_c0_seq1 comp55536_c0_seq1
comp49904_c0_seq1 comp56008_c4_seq1
comp49904_c0_seq1 comp56631_c0_seq24
comp49904_c0_seq1 comp60981_c0_seq1
comp49933_c0_seq3 comp51598_c0_seq1
comp49933_c0_seq3 comp55318_c0_seq2
comp49935_c0_seq1 comp53328_c0_seq4
comp49935_c0_seq1 comp58476_c0_seq20
comp49935_c0_seq1 comp59012_c0_seq9
comp49935_c0_seq1 comp60083_c0_seq2
comp49962_c0_seq3 comp51386_c0_seq3
comp49979_c0_seq3 comp56282_c0_seq2
comp49985_c0_seq1 comp54580_c0_seq2
comp49995_c0_seq2 comp50178_c0_seq1
comp49995_c0_seq2 comp54035_c0_seq3
comp49995_c0_seq2 comp57123_c0_seq5
comp49995_c0_seq2 comp57909_c0_seq3
comp50007_c0_seq1 comp51995_c0_seq2
comp50007_c0_seq1 comp54765_c0_seq1
comp50007_c0_seq1 comp55354_c0_seq3
comp50007_c0_seq1 comp56579_c1_seq6
comp50019_c0_seq3 comp51789_c0_seq4
comp50021_c0_seq1 comp50178_c0_seq1
comp50021_c0_seq1 comp54035_c0_seq3
comp50021_c0_seq1 comp57123_c0_seq5
comp50021_c0_seq1 comp57909_c0_seq3
comp50038_c0_seq2 comp53916_c0_seq1
comp50053_c0_seq1 comp57783_c0_seq1
comp50062_c0_seq1 comp52478_c0_seq3
comp50062_c0_seq1 comp54480_c0_seq1
comp50062_c0_seq1 comp54651_c0_seq6
comp50062_c0_seq1 comp57195_c0_seq1
comp50063_c0_seq1 comp55201_c0_seq1
comp50110_c0_seq1 comp50178_c0_seq1
comp50110_c0_seq1 comp55030_c0_seq1
comp50110_c0_seq1 comp55263_c1_seq2
comp50110_c0_seq1 comp57552_c0_seq4
comp50110_c0_seq1 comp57909_c0_seq3
comp50111_c0_seq2 comp50363_c0_seq1
comp50111_c0_seq2 comp53185_c0_seq2
comp50111_c0_seq2 comp60086_c1_seq1
comp50121_c0_seq1 comp52136_c0_seq1
comp50121_c0_seq1 comp56297_c0_seq2
comp50121_c0_seq1 comp57260_c0_seq12
comp50121_c0_seq1 comp57625_c1_seq31
comp50121_c0_seq1 comp58770_c0_seq8
comp50121_c0_seq1 comp58824_c1_seq21
comp50121_c0_seq1 comp59497_c0_seq12
comp50129_c1_seq1 comp57220_c0_seq3
comp50143_c1_seq1 comp51275_c0_seq4
comp50143_c1_seq1 comp59516_c3_seq5
comp50143_c1_seq1 comp60135_c0_seq6
comp50155_c0_seq3 comp50255_c0_seq1
comp50155_c0_seq3 comp50948_c0_seq1
comp50155_c0_seq3 comp51792_c0_seq2
comp50155_c0_seq3 comp52368_c0_seq11
comp50155_c0_seq3 comp52795_c0_seq2
comp50155_c0_seq3 comp53051_c0_seq5
comp50155_c0_seq3 comp53526_c1_seq3
comp50155_c0_seq3 comp55536_c0_seq1
comp50155_c0_seq3 comp56008_c4_seq1
comp50155_c0_seq3 comp56631_c0_seq24
comp50155_c0_seq3 comp58724_c0_seq2
comp50155_c0_seq3 comp60981_c0_seq1
comp50161_c0_seq1 comp51827_c0_seq1
comp50161_c0_seq1 comp52258_c0_seq2
comp50161_c0_seq1 comp53237_c0_seq2
comp50161_c0_seq1 comp54559_c0_seq2
comp50161_c0_seq1 comp55237_c0_seq1
comp50161_c0_seq1 comp56084_c0_seq2
comp50161_c0_seq1 comp56287_c1_seq2
comp50161_c0_seq1 comp57746_c0_seq1
comp50161_c0_seq1 comp57829_c0_seq1
comp50168_c0_seq1 comp50218_c0_seq1
comp50168_c0_seq1 comp59862_c0_seq7
comp50172_c2_seq1 comp52258_c0_seq2
comp50172_c2_seq1 comp53237_c0_seq2
comp50172_c2_seq1 comp53296_c0_seq3
comp50172_c2_seq1 comp54559_c0_seq2
comp50172_c2_seq1 comp56084_c0_seq2
comp50172_c2_seq1 comp57618_c0_seq1
comp50172_c2_seq1 comp59662_c0_seq2
comp50172_c2_seq1 comp60000_c0_seq2
comp50178_c0_seq1 comp50610_c0_seq6
comp50178_c0_seq1 comp50906_c0_seq3
comp50178_c0_seq1 comp51070_c0_seq1
comp50178_c0_seq1 comp51250_c0_seq1
comp50178_c0_seq1 comp51432_c0_seq2
comp50178_c0_seq1 comp51576_c0_seq10
comp50178_c0_seq1 comp51690_c0_seq1
comp50178_c0_seq1 comp51990_c1_seq3
comp50178_c0_seq1 comp52143_c0_seq1
comp50178_c0_seq1 comp52258_c0_seq2
comp50178_c0_seq1 comp52478_c0_seq3
comp50178_c0_seq1 comp52677_c0_seq2
comp50178_c0_seq1 comp52812_c0_seq2
comp50178_c0_seq1 comp53220_c1_seq6
comp50178_c0_seq1 comp53237_c0_seq2
comp50178_c0_seq1 comp53240_c0_seq2
comp50178_c0_seq1 comp53597_c0_seq1
comp50178_c0_seq1 comp53664_c0_seq2
comp50178_c0_seq1 comp53885_c1_seq2
comp50178_c0_seq1 comp53930_c1_seq1
comp50178_c0_seq1 comp54327_c0_seq1
comp50178_c0_seq1 comp54480_c0_seq1
comp50178_c0_seq1 comp54559_c0_seq2
comp50178_c0_seq1 comp54891_c0_seq3
comp50178_c0_seq1 comp54945_c0_seq1
comp50178_c0_seq1 comp55071_c0_seq1
comp50178_c0_seq1 comp55276_c0_seq1
comp50178_c0_seq1 comp55460_c0_seq1
comp50178_c0_seq1 comp55780_c0_seq6
comp50178_c0_seq1 comp55796_c1_seq1
comp50178_c0_seq1 comp56084_c0_seq2
comp50178_c0_seq1 comp56152_c0_seq2
comp50178_c0_seq1 comp56554_c0_seq2
comp50178_c0_seq1 comp56700_c0_seq2
comp50178_c0_seq1 comp56804_c0_seq1
comp50178_c0_seq1 comp56809_c0_seq1
comp50178_c0_seq1 comp57029_c0_seq2
comp50178_c0_seq1 comp57093_c2_seq1
comp50178_c0_seq1 comp57851_c0_seq33
comp50178_c0_seq1 comp58379_c1_seq1
comp50178_c0_seq1 comp58393_c0_seq7
comp50178_c0_seq1 comp58427_c0_seq2
comp50178_c0_seq1 comp58554_c1_seq3
comp50178_c0_seq1 comp59022_c2_seq20
comp50178_c0_seq1 comp59294_c1_seq16
comp50178_c0_seq1 comp59300_c0_seq20
comp50178_c0_seq1 comp59339_c0_seq11
comp50178_c0_seq1 comp59570_c0_seq1
comp50178_c0_seq1 comp59759_c0_seq2
comp50178_c0_seq1 comp59786_c0_seq2
comp50178_c0_seq1 comp59811_c2_seq6
comp50178_c0_seq1 comp59824_c3_seq3
comp50178_c0_seq1 comp60158_c0_seq3
comp50178_c0_seq1 comp60315_c0_seq1
comp50178_c0_seq1 comp60433_c0_seq1
comp50178_c0_seq1 comp61422_c0_seq1
comp50180_c0_seq1 comp51658_c0_seq1
comp50180_c0_seq1 comp54679_c0_seq1
comp50180_c0_seq1 comp55138_c0_seq1
comp50180_c0_seq1 comp57893_c0_seq7
comp50186_c0_seq11 comp51821_c0_seq1
comp50186_c0_seq11 comp55910_c3_seq1
comp50186_c0_seq11 comp57046_c0_seq7
comp50186_c0_seq11 comp57539_c1_seq1
comp50200_c0_seq2 comp59861_c0_seq5
comp50202_c0_seq2 comp53248_c0_seq2
comp50202_c0_seq2 comp54043_c0_seq5
comp50202_c0_seq2 comp56821_c0_seq1
comp50202_c0_seq2 comp58012_c0_seq19
comp50202_c0_seq2 comp59009_c0_seq2
comp50202_c0_seq2 comp59339_c0_seq11
comp50207_c0_seq1 comp51297_c0_seq5
comp50207_c0_seq1 comp56894_c0_seq1
comp50207_c0_seq1 comp58966_c0_seq2
comp50207_c0_seq1 comp59540_c0_seq3
comp50207_c0_seq1 comp59647_c0_seq6
comp50212_c0_seq1 comp52963_c0_seq5
comp50212_c0_seq1 comp55338_c1_seq2
comp50212_c0_seq1 comp56096_c0_seq3
comp50212_c0_seq1 comp56355_c0_seq1
comp50213_c0_seq3 comp59745_c0_seq12
comp50218_c0_seq1 comp54166_c0_seq4
comp50218_c0_seq1 comp54547_c0_seq1
comp50218_c0_seq1 comp54625_c0_seq3
comp50218_c0_seq1 comp55106_c1_seq1
comp50218_c0_seq1 comp56139_c0_seq1
comp50218_c0_seq1 comp64729_c0_seq1
comp50239_c0_seq1 comp52341_c0_seq1
comp50239_c0_seq1 comp53759_c0_seq1
comp50239_c0_seq1 comp56180_c0_seq1
comp50255_c0_seq1 comp52368_c0_seq11
comp50255_c0_seq1 comp52795_c0_seq2
comp50255_c0_seq1 comp53051_c0_seq5
comp50301_c0_seq4 comp56995_c0_seq2
comp50301_c0_seq4 comp59688_c1_seq3
comp50302_c0_seq1 comp56448_c0_seq21
comp50305_c0_seq1 comp50574_c0_seq1
comp50305_c0_seq1 comp51342_c0_seq1
comp50305_c0_seq1 comp53514_c0_seq2
comp50305_c0_seq1 comp57189_c0_seq1
comp50305_c0_seq1 comp59000_c0_seq7
comp50305_c0_seq1 comp59489_c1_seq1
comp50305_c0_seq1 comp60842_c0_seq1
comp50313_c0_seq1 comp50853_c0_seq2
comp50313_c0_seq1 comp53637_c0_seq1
comp50313_c0_seq1 comp54912_c0_seq1
comp50313_c0_seq1 comp56879_c0_seq1
comp50313_c0_seq1 comp58244_c0_seq2
comp50313_c0_seq1 comp59658_c2_seq3
comp50315_c0_seq3 comp52199_c0_seq1
comp50315_c0_seq3 comp52478_c0_seq3
comp50315_c0_seq3 comp53050_c0_seq1
comp50315_c0_seq3 comp53664_c0_seq2
comp50315_c0_seq3 comp55155_c0_seq2
comp50315_c0_seq3 comp55271_c1_seq2
comp50315_c0_seq3 comp56565_c0_seq2
comp50315_c0_seq3 comp57782_c3_seq4
comp50315_c0_seq3 comp58201_c1_seq1
comp50315_c0_seq3 comp58397_c0_seq1
comp50319_c0_seq1 comp58522_c1_seq5
comp50319_c0_seq1 comp59811_c1_seq2
comp50344_c0_seq3 comp53284_c0_seq2
comp50344_c0_seq3 comp57782_c3_seq4
comp50345_c0_seq1 comp52208_c0_seq2
comp50345_c0_seq1 comp53050_c0_seq1
comp50345_c0_seq1 comp56565_c0_seq2
comp50345_c0_seq1 comp56809_c0_seq1
comp50345_c0_seq1 comp57615_c0_seq3
comp50345_c0_seq1 comp58397_c0_seq1
comp50345_c0_seq1 comp59133_c0_seq2
comp50362_c0_seq1 comp51625_c0_seq3
comp50362_c0_seq1 comp53939_c0_seq3
comp50363_c0_seq1 comp52034_c0_seq2
comp50363_c0_seq1 comp57348_c0_seq9
comp50363_c0_seq1 comp60086_c1_seq1
comp50376_c0_seq3 comp53795_c0_seq1
comp50376_c0_seq3 comp54412_c0_seq3
comp50376_c0_seq3 comp56054_c0_seq24
comp50383_c0_seq2 comp53960_c0_seq3
comp50383_c0_seq2 comp59680_c2_seq4
comp50383_c0_seq2 comp59715_c0_seq9
comp50421_c0_seq1 comp50943_c0_seq2
comp50421_c0_seq1 comp51526_c0_seq6
comp50421_c0_seq1 comp51658_c0_seq1
comp50421_c0_seq1 comp51811_c0_seq1
comp50421_c0_seq1 comp52358_c0_seq3
comp50421_c0_seq1 comp53988_c0_seq2
comp50421_c0_seq1 comp54511_c0_seq1
comp50421_c0_seq1 comp55138_c0_seq1
comp50421_c0_seq1 comp55379_c1_seq2
comp50421_c0_seq1 comp56180_c0_seq1
comp50421_c0_seq1 comp57017_c0_seq2
comp50421_c0_seq1 comp57893_c0_seq7
comp50421_c0_seq1 comp59031_c0_seq28
comp50421_c0_seq1 comp59309_c1_seq3
comp50456_c0_seq1 comp54580_c0_seq2
comp50499_c0_seq1 comp54580_c0_seq2
comp50501_c0_seq1 comp52801_c0_seq1
comp50533_c0_seq5 comp55298_c0_seq6
comp50533_c0_seq5 comp55899_c0_seq3
comp50533_c0_seq5 comp56809_c0_seq1
comp50548_c0_seq1 comp51576_c0_seq10
comp50548_c0_seq1 comp54327_c0_seq1
comp50548_c0_seq1 comp54736_c0_seq1
comp50548_c0_seq1 comp54945_c0_seq1
comp50548_c0_seq1 comp55276_c0_seq1
comp50548_c0_seq1 comp56073_c0_seq2
comp50548_c0_seq1 comp57093_c2_seq1
comp50548_c0_seq1 comp59294_c1_seq16
comp50548_c0_seq1 comp61422_c0_seq1
comp50551_c0_seq4 comp55779_c0_seq2
comp50551_c0_seq4 comp56015_c3_seq1
comp50551_c0_seq4 comp57300_c0_seq2
comp50551_c0_seq4 comp58146_c0_seq14
comp50551_c0_seq4 comp59082_c2_seq12
comp50551_c0_seq4 comp59978_c0_seq4
comp50559_c0_seq1 comp56594_c0_seq3
comp50559_c0_seq1 comp56780_c0_seq1
comp50573_c0_seq1 comp54580_c0_seq2
comp50573_c0_seq1 comp56523_c0_seq29
comp50573_c0_seq1 comp56598_c0_seq9
comp50574_c0_seq1 comp50948_c0_seq1
comp50574_c0_seq1 comp52956_c0_seq3
comp50574_c0_seq1 comp57189_c0_seq1
comp50574_c0_seq1 comp59489_c1_seq1
comp50598_c0_seq1 comp52258_c0_seq2
comp50598_c0_seq1 comp52588_c0_seq1
comp50598_c0_seq1 comp53237_c0_seq2
comp50598_c0_seq1 comp54003_c0_seq1
comp50598_c0_seq1 comp54559_c0_seq2
comp50598_c0_seq1 comp54580_c0_seq2
comp50598_c0_seq1 comp56084_c0_seq2
comp50598_c0_seq1 comp57664_c1_seq5
comp50598_c0_seq1 comp59082_c2_seq12
comp50598_c0_seq1 comp97705_c0_seq1
comp50610_c0_seq6 comp55030_c0_seq1
comp50610_c0_seq6 comp55263_c1_seq2
comp50610_c0_seq6 comp57552_c0_seq4
comp50610_c0_seq6 comp57909_c0_seq3
comp50621_c0_seq1 comp52413_c0_seq3
comp50621_c0_seq1 comp53461_c0_seq3
comp50621_c0_seq1 comp54858_c0_seq2
comp50621_c0_seq1 comp56404_c3_seq10
comp50621_c0_seq1 comp57883_c0_seq6
comp50621_c0_seq1 comp58069_c0_seq22
comp50633_c0_seq1 comp59748_c0_seq1
comp50648_c0_seq3 comp53359_c0_seq3
comp50648_c0_seq3 comp58803_c1_seq2
comp50687_c0_seq1 comp55681_c0_seq1
comp50687_c0_seq1 comp56405_c0_seq3
comp50687_c0_seq1 comp59037_c0_seq6
comp50687_c0_seq1 comp59650_c1_seq1
comp50690_c0_seq2 comp54211_c1_seq1
comp50690_c0_seq2 comp55272_c0_seq2
comp50690_c0_seq2 comp56009_c0_seq1
comp50690_c0_seq2 comp56096_c0_seq3
comp50690_c0_seq2 comp56556_c0_seq19
comp50690_c0_seq2 comp58548_c0_seq12
comp50730_c0_seq3 comp52958_c0_seq1
comp50730_c0_seq3 comp53905_c0_seq3
comp50730_c0_seq3 comp54717_c0_seq4
comp50730_c0_seq3 comp59625_c0_seq6
comp50777_c0_seq1 comp56136_c0_seq2
comp50777_c0_seq1 comp56177_c0_seq3
comp50777_c0_seq1 comp56915_c0_seq10
comp50777_c0_seq1 comp58973_c6_seq12
comp50798_c0_seq1 comp59219_c1_seq1
comp50836_c0_seq2 comp55846_c0_seq5
comp50836_c0_seq2 comp57004_c0_seq6
comp50837_c1_seq6 comp55681_c0_seq1
comp50853_c0_seq2 comp52064_c0_seq4
comp50853_c0_seq2 comp53508_c0_seq1
comp50853_c0_seq2 comp53637_c0_seq1
comp50853_c0_seq2 comp54554_c1_seq1
comp50853_c0_seq2 comp56879_c0_seq1
comp50853_c0_seq2 comp56927_c0_seq1
comp50853_c0_seq2 comp58434_c0_seq1
comp50886_c0_seq8 comp54736_c0_seq1
comp50886_c0_seq8 comp55394_c0_seq1
comp50886_c0_seq8 comp56073_c0_seq2
comp50886_c0_seq8 comp58387_c3_seq1
comp50906_c0_seq3 comp54580_c0_seq2
comp50906_c0_seq3 comp57909_c0_seq3
comp50913_c0_seq2 comp52730_c0_seq1
comp50913_c0_seq2 comp54288_c0_seq14
comp50913_c0_seq2 comp55796_c1_seq1
comp50913_c0_seq2 comp56152_c0_seq2
comp50913_c0_seq2 comp56554_c0_seq2
comp50913_c0_seq2 comp56809_c0_seq1
comp50913_c0_seq2 comp57782_c3_seq4
comp50913_c0_seq2 comp57988_c2_seq2
comp50913_c0_seq2 comp58792_c0_seq4
comp50913_c0_seq2 comp59034_c7_seq2
comp50913_c0_seq2 comp59129_c0_seq1
comp50913_c0_seq2 comp59306_c0_seq2
comp50917_c0_seq1 comp52258_c0_seq2
comp50917_c0_seq1 comp53237_c0_seq2
comp50917_c0_seq1 comp54559_c0_seq2
comp50917_c0_seq1 comp56084_c0_seq2
comp50943_c0_seq2 comp51526_c0_seq6
comp50943_c0_seq2 comp52110_c0_seq1
comp50943_c0_seq2 comp53376_c0_seq1
comp50943_c0_seq2 comp53900_c0_seq1
comp50943_c0_seq2 comp53916_c0_seq1
comp50943_c0_seq2 comp54302_c0_seq2
comp50943_c0_seq2 comp54580_c0_seq2
comp50943_c0_seq2 comp54736_c1_seq2
comp50943_c0_seq2 comp54868_c0_seq2
comp50943_c0_seq2 comp55379_c1_seq2
comp50943_c0_seq2 comp56083_c0_seq2
comp50943_c0_seq2 comp56187_c0_seq4
comp50943_c0_seq2 comp56282_c0_seq2
comp50943_c0_seq2 comp56346_c0_seq2
comp50943_c0_seq2 comp56385_c0_seq2
comp50943_c0_seq2 comp57847_c0_seq5
comp50943_c0_seq2 comp58157_c0_seq2
comp50943_c0_seq2 comp59027_c3_seq2
comp50943_c0_seq2 comp59994_c0_seq8
comp50948_c0_seq1 comp52368_c0_seq11
comp50948_c0_seq1 comp52795_c0_seq2
comp50948_c0_seq1 comp53051_c0_seq5
comp50948_c0_seq1 comp53526_c1_seq3
comp50948_c0_seq1 comp55536_c0_seq1
comp50948_c0_seq1 comp58724_c0_seq2
comp50948_c0_seq1 comp60981_c0_seq1
comp50949_c0_seq1 comp53814_c0_seq16
comp50949_c0_seq1 comp58103_c0_seq3
comp50963_c0_seq1 comp52258_c0_seq2
comp50963_c0_seq1 comp53237_c0_seq2
comp50963_c0_seq1 comp54559_c0_seq2
comp50963_c0_seq1 comp56084_c0_seq2
comp50968_c0_seq1 comp54830_c0_seq1
comp50968_c0_seq1 comp57957_c1_seq7
comp50984_c0_seq1 comp53960_c0_seq3
comp50984_c0_seq1 comp59680_c2_seq4
comp50984_c0_seq1 comp59715_c0_seq9
comp51031_c0_seq2 comp56008_c4_seq1
comp51043_c0_seq2 comp52164_c0_seq2
comp51063_c0_seq3 comp53767_c0_seq2
comp51063_c0_seq3 comp56939_c2_seq7
comp51063_c0_seq3 comp58659_c0_seq1
comp51068_c0_seq4 comp51433_c0_seq3
comp51070_c0_seq1 comp54580_c0_seq2
comp51070_c0_seq1 comp57909_c0_seq3
comp51074_c0_seq1 comp55869_c2_seq11
comp51083_c0_seq1 comp54912_c0_seq1
comp51083_c0_seq1 comp58244_c0_seq2
comp51083_c0_seq1 comp59658_c2_seq3
comp51133_c0_seq2 comp53046_c0_seq1
comp51133_c0_seq2 comp54912_c0_seq1
comp51133_c0_seq2 comp55588_c0_seq7
comp51133_c0_seq2 comp55596_c0_seq2
comp51133_c0_seq2 comp55696_c0_seq2
comp51133_c0_seq2 comp55707_c0_seq1
comp51133_c0_seq2 comp56548_c6_seq59
comp51133_c0_seq2 comp56885_c2_seq5
comp51133_c0_seq2 comp57145_c0_seq2
comp51133_c0_seq2 comp57592_c0_seq4
comp51133_c0_seq2 comp58244_c0_seq2
comp51133_c0_seq2 comp59658_c2_seq3
comp51133_c0_seq2 comp59770_c0_seq50
comp51133_c0_seq2 comp60102_c0_seq3
comp51148_c0_seq2 comp56911_c1_seq1
comp51148_c0_seq2 comp56977_c3_seq1
comp51148_c0_seq2 comp59242_c1_seq4
comp51167_c0_seq3 comp54580_c0_seq2
comp51172_c0_seq1 comp52068_c0_seq3
comp51172_c0_seq1 comp54503_c0_seq1
comp51172_c0_seq1 comp57384_c0_seq4
comp51172_c0_seq1 comp57634_c2_seq2
comp51172_c0_seq1 comp58061_c0_seq7
comp51172_c0_seq1 comp59157_c1_seq1
comp51186_c0_seq2 comp56809_c0_seq1
comp51206_c1_seq6 comp51369_c0_seq1
comp51206_c1_seq6 comp52562_c0_seq2
comp51206_c1_seq6 comp56732_c0_seq2
comp51206_c1_seq6 comp59480_c0_seq2
comp51206_c1_seq6 comp60161_c0_seq1
comp51206_c1_seq6 comp60533_c0_seq1
comp51248_c0_seq4 comp59636_c1_seq3
comp51250_c0_seq1 comp54035_c0_seq3
comp51250_c0_seq1 comp57123_c0_seq5
comp51250_c0_seq1 comp57909_c0_seq3
comp51255_c1_seq1 comp56809_c0_seq1
comp51265_c0_seq10 comp56096_c0_seq3
comp51291_c0_seq1 comp52258_c0_seq2
comp51291_c0_seq1 comp53237_c0_seq2
comp51291_c0_seq1 comp54559_c0_seq2
comp51291_c0_seq1 comp56084_c0_seq2
comp51297_c0_seq5 comp60023_c2_seq1
comp51313_c0_seq1 comp51576_c0_seq10
comp51313_c0_seq1 comp52068_c0_seq3
comp51313_c0_seq1 comp52433_c0_seq1
comp51313_c0_seq1 comp53960_c0_seq3
comp51313_c0_seq1 comp54327_c0_seq1
comp51313_c0_seq1 comp54503_c0_seq1
comp51313_c0_seq1 comp54945_c0_seq1
comp51313_c0_seq1 comp55276_c0_seq1
comp51313_c0_seq1 comp56012_c0_seq4
comp51313_c0_seq1 comp56526_c1_seq5
comp51313_c0_seq1 comp57093_c2_seq1
comp51313_c0_seq1 comp57384_c0_seq4
comp51313_c0_seq1 comp57634_c2_seq2
comp51313_c0_seq1 comp57793_c0_seq1
comp51313_c0_seq1 comp58061_c0_seq7
comp51313_c0_seq1 comp59157_c1_seq1
comp51313_c0_seq1 comp59294_c1_seq16
comp51313_c0_seq1 comp59664_c0_seq2
comp51313_c0_seq1 comp59680_c2_seq4
comp51313_c0_seq1 comp59715_c0_seq9
comp51313_c0_seq1 comp61422_c0_seq1
comp51313_c0_seq1 comp62980_c0_seq1
comp51334_c0_seq2 comp56096_c0_seq3
comp51342_c0_seq1 comp53514_c0_seq2
comp51342_c0_seq1 comp59489_c1_seq1
comp51369_c0_seq1 comp52478_c0_seq3
comp51369_c0_seq1 comp54073_c0_seq1
comp51369_c0_seq1 comp57477_c0_seq1
comp51369_c0_seq1 comp57737_c1_seq1
comp51369_c0_seq1 comp58334_c0_seq1
comp51369_c0_seq1 comp59354_c0_seq7
comp51369_c0_seq1 comp59480_c0_seq2
comp51387_c0_seq2 comp52068_c0_seq3
comp51389_c0_seq1 comp56758_c0_seq16
comp51412_c0_seq1 comp54580_c0_seq2
comp51424_c0_seq6 comp52481_c1_seq11
comp51424_c0_seq6 comp54352_c0_seq2
comp51424_c0_seq6 comp56834_c0_seq5
comp51426_c0_seq9 comp52258_c0_seq2
comp51426_c0_seq9 comp52540_c1_seq2
comp51426_c0_seq9 comp52776_c0_seq2
comp51426_c0_seq9 comp53237_c0_seq2
comp51426_c0_seq9 comp53999_c0_seq3
comp51426_c0_seq9 comp54559_c0_seq2
comp51426_c0_seq9 comp55700_c0_seq1
comp51426_c0_seq9 comp56084_c0_seq2
comp51426_c0_seq9 comp56101_c0_seq6
comp51426_c0_seq9 comp56536_c0_seq1
comp51426_c0_seq9 comp56692_c0_seq2
comp51426_c0_seq9 comp57227_c0_seq4
comp51426_c0_seq9 comp57972_c0_seq1
comp51426_c0_seq9 comp58464_c0_seq2
comp51426_c0_seq9 comp58714_c0_seq8
comp51426_c0_seq9 comp88082_c0_seq1
comp51432_c0_seq2 comp54580_c0_seq2
comp51432_c0_seq2 comp55030_c0_seq1
comp51432_c0_seq2 comp55263_c1_seq2
comp51432_c0_seq2 comp56523_c0_seq29
comp51432_c0_seq2 comp57552_c0_seq4
comp51432_c0_seq2 comp57909_c0_seq3
comp51441_c0_seq2 comp56594_c0_seq3
comp51441_c0_seq2 comp56780_c0_seq1
comp51441_c0_seq2 comp6598_c0_seq1
comp51444_c0_seq1 comp52031_c0_seq2
comp51444_c0_seq1 comp52501_c0_seq1
comp51465_c0_seq1 comp52478_c0_seq3
comp51465_c0_seq1 comp52977_c0_seq2
comp51465_c0_seq1 comp56442_c0_seq4
comp51469_c0_seq4 comp54580_c0_seq2
comp51508_c0_seq1 comp56152_c0_seq2
comp51508_c0_seq1 comp56554_c0_seq2
comp51508_c0_seq1 comp56809_c0_seq1
comp51508_c0_seq1 comp59339_c0_seq11
comp51511_c0_seq1 comp59545_c2_seq3
comp51513_c0_seq2 comp51827_c0_seq1
comp51513_c0_seq2 comp54580_c0_seq2
comp51513_c0_seq2 comp55237_c0_seq1
comp51513_c0_seq2 comp56287_c1_seq2
comp51513_c0_seq2 comp57746_c0_seq1
comp51513_c0_seq2 comp57829_c0_seq1
comp51513_c0_seq2 comp93954_c0_seq1
comp51526_c0_seq6 comp52110_c0_seq1
comp51526_c0_seq6 comp53988_c0_seq2
comp51526_c0_seq6 comp54107_c0_seq2
comp51526_c0_seq6 comp58157_c0_seq2
comp51526_c0_seq6 comp59027_c3_seq2
comp51526_c0_seq6 comp59994_c0_seq8
comp51526_c0_seq6 comp64047_c0_seq1
comp51540_c0_seq1 comp53057_c0_seq2
comp51540_c0_seq1 comp54644_c0_seq1
comp51540_c0_seq1 comp58276_c1_seq15
comp51555_c0_seq1 comp56598_c0_seq9
comp51559_c0_seq1 comp52068_c0_seq3
comp51559_c0_seq1 comp54503_c0_seq1
comp51559_c0_seq1 comp57384_c0_seq4
comp51559_c0_seq1 comp57634_c2_seq2
comp51559_c0_seq1 comp58061_c0_seq7
comp51559_c0_seq1 comp59157_c1_seq1
comp51576_c0_seq10 comp52068_c0_seq3
comp51576_c0_seq10 comp52075_c0_seq1
comp51576_c0_seq10 comp55030_c0_seq1
comp51576_c0_seq10 comp55263_c1_seq2
comp51576_c0_seq10 comp56526_c1_seq5
comp51576_c0_seq10 comp57552_c0_seq4
comp51576_c0_seq10 comp57909_c0_seq3
comp51576_c0_seq10 comp58794_c0_seq3
comp51576_c0_seq10 comp58859_c0_seq17
comp51576_c0_seq10 comp59227_c0_seq2
comp51576_c0_seq10 comp59328_c0_seq1
comp51576_c0_seq10 comp59650_c1_seq1
comp51582_c0_seq1 comp52258_c0_seq2
comp51582_c0_seq1 comp53237_c0_seq2
comp51582_c0_seq1 comp54559_c0_seq2
comp51582_c0_seq1 comp56084_c0_seq2
comp51582_c0_seq1 comp56355_c0_seq1
comp51582_c0_seq1 comp56995_c0_seq2
comp51616_c0_seq3 comp54580_c0_seq2
comp51617_c0_seq1 comp57782_c3_seq4
comp51635_c0_seq2 comp59742_c0_seq7
comp51641_c0_seq6 comp52208_c0_seq2
comp51646_c0_seq1 comp54580_c0_seq2
comp51658_c0_seq1 comp52358_c0_seq3
comp51658_c0_seq1 comp53988_c0_seq2
comp51658_c0_seq1 comp54172_c1_seq4
comp51658_c0_seq1 comp54679_c0_seq1
comp51658_c0_seq1 comp55138_c0_seq1
comp51658_c0_seq1 comp56180_c0_seq1
comp51658_c0_seq1 comp59031_c0_seq28
comp51658_c0_seq1 comp59309_c1_seq3
comp51661_c0_seq1 comp59219_c1_seq1
comp51664_c0_seq1 comp59197_c1_seq2
comp51664_c0_seq1 comp59815_c0_seq3
comp51664_c0_seq1 comp59852_c2_seq29
comp51675_c0_seq1 comp52778_c0_seq2
comp51675_c0_seq1 comp58162_c0_seq27
comp51675_c0_seq1 comp58680_c2_seq1
comp51675_c0_seq1 comp58754_c0_seq10
comp51690_c0_seq1 comp55030_c0_seq1
comp51690_c0_seq1 comp55263_c1_seq2
comp51690_c0_seq1 comp56829_c0_seq2
comp51690_c0_seq1 comp57552_c0_seq4
comp51690_c0_seq1 comp57909_c0_seq3
comp51737_c0_seq1 comp56390_c0_seq2
comp51755_c0_seq2 comp52437_c0_seq1
comp51755_c0_seq2 comp54809_c0_seq1
comp51755_c0_seq2 comp55654_c1_seq27
comp51755_c0_seq2 comp57248_c0_seq1
comp51755_c0_seq2 comp57483_c0_seq5
comp51755_c0_seq2 comp57936_c0_seq1
comp51755_c0_seq2 comp58073_c0_seq1
comp51755_c0_seq2 comp58844_c0_seq16
comp51755_c0_seq2 comp59038_c0_seq3
comp51755_c0_seq2 comp59370_c0_seq1
comp51755_c0_seq2 comp59742_c1_seq3
comp51755_c0_seq2 comp59973_c0_seq6
comp51761_c0_seq1 comp52258_c0_seq2
comp51761_c0_seq1 comp53237_c0_seq2
comp51761_c0_seq1 comp54559_c0_seq2
comp51761_c0_seq1 comp56084_c0_seq2
comp51761_c0_seq1 comp59362_c0_seq1
comp51792_c0_seq2 comp52368_c0_seq11
comp51792_c0_seq2 comp52795_c0_seq2
comp51792_c0_seq2 comp53051_c0_seq5
comp51792_c0_seq2 comp53526_c1_seq3
comp51792_c0_seq2 comp55536_c0_seq1
comp51792_c0_seq2 comp56008_c4_seq1
comp51792_c0_seq2 comp56631_c0_seq24
comp51792_c0_seq2 comp60981_c0_seq1
comp51799_c0_seq7 comp57919_c0_seq11
comp51805_c0_seq3 comp55658_c0_seq2
comp51813_c0_seq2 comp53960_c0_seq3
comp51813_c0_seq2 comp57535_c2_seq1
comp51813_c0_seq2 comp59680_c2_seq4
comp51813_c0_seq2 comp59715_c0_seq9
comp51821_c0_seq1 comp56812_c0_seq1
comp51827_c0_seq1 comp52258_c0_seq2
comp51827_c0_seq1 comp53237_c0_seq2
comp51827_c0_seq1 comp53296_c0_seq3
comp51827_c0_seq1 comp54559_c0_seq2
comp51827_c0_seq1 comp54580_c0_seq2
comp51827_c0_seq1 comp56084_c0_seq2
comp51827_c0_seq1 comp59327_c0_seq18
comp51827_c0_seq1 comp59396_c0_seq6
comp51827_c0_seq1 comp96284_c0_seq1
comp51851_c0_seq2 comp52977_c0_seq2
comp51856_c0_seq1 comp54146_c1_seq2
comp51856_c0_seq1 comp56406_c0_seq5
comp51856_c0_seq1 comp59629_c0_seq6
comp51867_c0_seq1 comp56456_c0_seq1
comp51869_c0_seq1 comp52258_c0_seq2
comp51869_c0_seq1 comp53237_c0_seq2
comp51869_c0_seq1 comp54559_c0_seq2
comp51869_c0_seq1 comp54575_c1_seq2
comp51869_c0_seq1 comp56084_c0_seq2
comp51898_c0_seq2 comp58341_c0_seq13
comp51966_c0_seq2 comp53759_c0_seq1
comp51966_c0_seq2 comp54580_c0_seq2
comp51990_c1_seq3 comp52208_c0_seq2
comp51990_c1_seq3 comp55030_c0_seq1
comp51990_c1_seq3 comp55263_c1_seq2
comp51990_c1_seq3 comp57552_c0_seq4
comp51990_c1_seq3 comp57909_c0_seq3
comp51990_c1_seq3 comp58554_c1_seq3
comp51993_c0_seq6 comp56009_c0_seq1
comp51993_c0_seq6 comp56556_c0_seq19
comp51995_c0_seq2 comp52778_c0_seq2
comp51995_c0_seq2 comp53955_c0_seq2
comp51995_c0_seq2 comp54765_c0_seq1
comp51995_c0_seq2 comp54908_c4_seq13
comp51995_c0_seq2 comp55286_c0_seq11
comp51995_c0_seq2 comp55354_c0_seq3
comp51995_c0_seq2 comp55711_c0_seq1
comp51995_c0_seq2 comp56579_c1_seq6
comp51995_c0_seq2 comp57800_c0_seq7
comp51995_c0_seq2 comp58162_c0_seq27
comp51995_c0_seq2 comp59568_c4_seq8
comp51998_c0_seq1 comp58794_c0_seq3
comp51998_c0_seq1 comp59328_c0_seq1
comp52009_c2_seq2 comp57852_c0_seq1
comp52018_c0_seq1 comp52771_c0_seq1
comp52018_c0_seq1 comp54372_c0_seq18
comp52018_c0_seq1 comp54599_c0_seq3
comp52018_c0_seq1 comp55556_c0_seq1
comp52018_c0_seq1 comp55939_c0_seq3
comp52018_c0_seq1 comp56103_c0_seq11
comp52031_c0_seq2 comp52501_c0_seq1
comp52031_c0_seq2 comp53754_c0_seq2
comp52031_c0_seq2 comp57189_c0_seq1
comp52031_c0_seq2 comp59489_c1_seq1
comp52034_c0_seq2 comp53185_c0_seq2
comp52034_c0_seq2 comp60086_c1_seq1
comp52052_c0_seq1 comp53960_c0_seq3
comp52052_c0_seq1 comp59680_c2_seq4
comp52052_c0_seq1 comp59715_c0_seq9
comp52064_c0_seq4 comp53637_c0_seq1
comp52064_c0_seq4 comp54912_c0_seq1
comp52064_c0_seq4 comp56879_c0_seq1
comp52064_c0_seq4 comp58244_c0_seq2
comp52064_c0_seq4 comp59658_c2_seq3
comp52067_c0_seq1 comp53296_c0_seq3
comp52067_c0_seq1 comp54580_c0_seq2
comp52067_c0_seq1 comp55910_c3_seq1
comp52067_c0_seq1 comp57539_c1_seq1
comp52067_c0_seq1 comp59045_c0_seq1
comp52068_c0_seq3 comp52793_c0_seq3
comp52068_c0_seq3 comp53593_c0_seq4
comp52068_c0_seq3 comp53831_c0_seq3
comp52068_c0_seq3 comp54058_c0_seq2
comp52068_c0_seq3 comp54327_c0_seq1
comp52068_c0_seq3 comp54736_c0_seq1
comp52068_c0_seq3 comp54945_c0_seq1
comp52068_c0_seq3 comp55112_c0_seq3
comp52068_c0_seq3 comp55276_c0_seq1
comp52068_c0_seq3 comp55436_c1_seq6
comp52068_c0_seq3 comp55907_c0_seq2
comp52068_c0_seq3 comp56073_c0_seq2
comp52068_c0_seq3 comp56221_c0_seq2
comp52068_c0_seq3 comp56526_c1_seq5
comp52068_c0_seq3 comp56873_c0_seq3
comp52068_c0_seq3 comp56965_c1_seq3
comp52068_c0_seq3 comp57093_c2_seq1
comp52068_c0_seq3 comp57190_c1_seq4
comp52068_c0_seq3 comp57716_c0_seq1
comp52068_c0_seq3 comp57844_c2_seq2
comp52068_c0_seq3 comp58139_c0_seq2
comp52068_c0_seq3 comp58221_c0_seq7
comp52068_c0_seq3 comp58228_c0_seq4
comp52068_c0_seq3 comp58271_c0_seq1
comp52068_c0_seq3 comp58292_c0_seq2
comp52068_c0_seq3 comp58464_c0_seq2
comp52068_c0_seq3 comp58572_c0_seq1
comp52068_c0_seq3 comp58794_c0_seq3
comp52068_c0_seq3 comp58870_c0_seq3
comp52068_c0_seq3 comp59227_c0_seq2
comp52068_c0_seq3 comp59294_c1_seq16
comp52068_c0_seq3 comp59328_c0_seq1
comp52068_c0_seq3 comp59952_c0_seq5
comp52068_c0_seq3 comp59995_c1_seq7
comp52068_c0_seq3 comp60005_c0_seq10
comp52068_c0_seq3 comp61422_c0_seq1
comp52075_c0_seq1 comp54189_c0_seq3
comp52075_c0_seq1 comp54327_c0_seq1
comp52075_c0_seq1 comp54881_c0_seq6
comp52075_c0_seq1 comp54945_c0_seq1
comp52075_c0_seq1 comp55276_c0_seq1
comp52075_c0_seq1 comp57093_c2_seq1
comp52075_c0_seq1 comp59262_c0_seq1
comp52075_c0_seq1 comp59294_c1_seq16
comp52075_c0_seq1 comp60007_c0_seq12
comp52075_c0_seq1 comp61422_c0_seq1
comp52110_c0_seq1 comp53916_c0_seq1
comp52110_c0_seq1 comp56282_c0_seq2
comp52110_c0_seq1 comp59994_c0_seq8
comp52124_c0_seq1 comp52129_c0_seq1
comp52124_c0_seq1 comp54467_c0_seq2
comp52124_c0_seq1 comp54686_c1_seq1
comp52124_c0_seq1 comp55480_c0_seq4
comp52124_c0_seq1 comp55666_c2_seq1
comp52124_c0_seq1 comp56956_c0_seq1
comp52124_c0_seq1 comp58095_c0_seq7
comp52124_c0_seq1 comp58523_c0_seq3
comp52124_c0_seq1 comp58835_c0_seq3
comp52124_c0_seq1 comp59138_c0_seq2
comp52124_c0_seq1 comp59395_c0_seq1
comp52124_c0_seq1 comp59607_c0_seq10
comp52124_c0_seq1 comp60161_c0_seq1
comp52124_c0_seq1 comp60533_c0_seq1
comp52124_c0_seq1 comp60537_c0_seq1
comp52136_c0_seq1 comp52413_c0_seq3
comp52136_c0_seq1 comp52487_c0_seq1
comp52136_c0_seq1 comp52913_c0_seq1
comp52136_c0_seq1 comp54858_c0_seq2
comp52136_c0_seq1 comp55386_c0_seq34
comp52136_c0_seq1 comp56404_c3_seq10
comp52136_c0_seq1 comp57067_c0_seq3
comp52136_c0_seq1 comp57662_c0_seq3
comp52136_c0_seq1 comp57883_c0_seq6
comp52136_c0_seq1 comp58069_c0_seq22
comp52136_c0_seq1 comp59257_c0_seq7
comp52136_c0_seq1 comp59862_c0_seq7
comp52136_c0_seq1 comp60146_c0_seq7
comp52143_c0_seq1 comp55030_c0_seq1
comp52143_c0_seq1 comp55263_c1_seq2
comp52143_c0_seq1 comp57552_c0_seq4
comp52143_c0_seq1 comp57909_c0_seq3
comp52151_c0_seq2 comp58157_c0_seq2
comp52151_c0_seq2 comp59801_c0_seq5
comp52164_c0_seq2 comp55850_c0_seq2
comp52173_c0_seq1 comp52413_c0_seq3
comp52173_c0_seq1 comp54858_c0_seq2
comp52173_c0_seq1 comp56404_c3_seq10
comp52173_c0_seq1 comp57883_c0_seq6
comp52173_c0_seq1 comp58069_c0_seq22
comp52185_c1_seq1 comp53958_c0_seq2
comp52185_c1_seq1 comp57972_c0_seq1
comp52192_c0_seq1 comp56152_c0_seq2
comp52192_c0_seq1 comp56554_c0_seq2
comp52203_c0_seq5 comp58926_c2_seq3
comp52208_c0_seq2 comp52677_c0_seq2
comp52208_c0_seq2 comp55077_c0_seq1
comp52208_c0_seq2 comp55231_c0_seq2
comp52208_c0_seq2 comp55796_c1_seq1
comp52208_c0_seq2 comp56146_c0_seq2
comp52208_c0_seq2 comp56405_c0_seq3
comp52208_c0_seq2 comp56809_c0_seq1
comp52208_c0_seq2 comp56833_c0_seq2
comp52208_c0_seq2 comp57069_c0_seq3
comp52208_c0_seq2 comp57851_c0_seq33
comp52208_c0_seq2 comp58393_c0_seq7
comp52208_c0_seq2 comp58554_c1_seq3
comp52208_c0_seq2 comp59300_c0_seq20
comp52208_c0_seq2 comp59339_c0_seq11
comp52208_c0_seq2 comp60185_c0_seq1
comp52208_c0_seq2 comp63552_c0_seq1
comp52220_c0_seq2 comp53768_c0_seq4
comp52220_c0_seq2 comp53819_c0_seq1
comp52221_c0_seq1 comp53754_c0_seq2
comp52221_c0_seq1 comp57988_c2_seq2
comp52231_c0_seq4 comp54580_c0_seq2
comp52258_c0_seq2 comp52273_c0_seq2
comp52258_c0_seq2 comp52403_c0_seq2
comp52258_c0_seq2 comp52414_c0_seq1
comp52258_c0_seq2 comp52474_c0_seq3
comp52258_c0_seq2 comp52478_c0_seq3
comp52258_c0_seq2 comp52540_c1_seq2
comp52258_c0_seq2 comp52588_c0_seq1
comp52258_c0_seq2 comp52700_c1_seq3
comp52258_c0_seq2 comp52714_c0_seq1
comp52258_c0_seq2 comp52745_c0_seq1
comp52258_c0_seq2 comp52755_c2_seq1
comp52258_c0_seq2 comp52955_c0_seq2
comp52258_c0_seq2 comp53237_c0_seq2
comp52258_c0_seq2 comp53335_c0_seq5
comp52258_c0_seq2 comp53353_c0_seq2
comp52258_c0_seq2 comp53452_c0_seq2
comp52258_c0_seq2 comp53870_c0_seq5
comp52258_c0_seq2 comp53944_c0_seq2
comp52258_c0_seq2 comp54003_c0_seq1
comp52258_c0_seq2 comp54035_c0_seq3
comp52258_c0_seq2 comp54149_c0_seq1
comp52258_c0_seq2 comp54217_c0_seq2
comp52258_c0_seq2 comp54424_c0_seq2
comp52258_c0_seq2 comp54477_c0_seq3
comp52258_c0_seq2 comp54559_c0_seq2
comp52258_c0_seq2 comp54771_c0_seq1
comp52258_c0_seq2 comp54813_c0_seq1
comp52258_c0_seq2 comp54877_c0_seq2
comp52258_c0_seq2 comp55030_c0_seq1
comp52258_c0_seq2 comp55225_c0_seq2
comp52258_c0_seq2 comp55231_c0_seq2
comp52258_c0_seq2 comp55237_c0_seq1
comp52258_c0_seq2 comp55263_c1_seq2
comp52258_c0_seq2 comp55318_c0_seq2
comp52258_c0_seq2 comp55541_c0_seq2
comp52258_c0_seq2 comp55602_c0_seq2
comp52258_c0_seq2 comp55700_c0_seq1
comp52258_c0_seq2 comp55732_c0_seq5
comp52258_c0_seq2 comp55764_c0_seq2
comp52258_c0_seq2 comp55820_c0_seq1
comp52258_c0_seq2 comp56084_c0_seq2
comp52258_c0_seq2 comp56158_c0_seq1
comp52258_c0_seq2 comp56287_c1_seq2
comp52258_c0_seq2 comp56372_c0_seq2
comp52258_c0_seq2 comp56380_c1_seq24
comp52258_c0_seq2 comp56427_c1_seq1
comp52258_c0_seq2 comp56489_c0_seq14
comp52258_c0_seq2 comp56536_c0_seq1
comp52258_c0_seq2 comp56620_c2_seq4
comp52258_c0_seq2 comp56688_c0_seq4
comp52258_c0_seq2 comp56739_c0_seq3
comp52258_c0_seq2 comp56759_c0_seq4
comp52258_c0_seq2 comp56762_c3_seq1
comp52258_c0_seq2 comp56794_c0_seq1
comp52258_c0_seq2 comp56798_c0_seq6
comp52258_c0_seq2 comp56861_c0_seq2
comp52258_c0_seq2 comp56916_c0_seq1
comp52258_c0_seq2 comp56930_c0_seq3
comp52258_c0_seq2 comp57017_c0_seq2
comp52258_c0_seq2 comp57069_c0_seq3
comp52258_c0_seq2 comp57097_c1_seq1
comp52258_c0_seq2 comp57109_c0_seq1
comp52258_c0_seq2 comp57149_c0_seq4
comp52258_c0_seq2 comp57210_c0_seq2
comp52258_c0_seq2 comp57226_c1_seq1
comp52258_c0_seq2 comp57227_c0_seq4
comp52258_c0_seq2 comp57237_c0_seq80
comp52258_c0_seq2 comp57239_c1_seq1
comp52258_c0_seq2 comp57292_c1_seq2
comp52258_c0_seq2 comp57434_c1_seq25
comp52258_c0_seq2 comp57540_c0_seq3
comp52258_c0_seq2 comp57552_c0_seq4
comp52258_c0_seq2 comp57609_c0_seq1
comp52258_c0_seq2 comp57612_c0_seq2
comp52258_c0_seq2 comp57627_c1_seq6
comp52258_c0_seq2 comp57649_c0_seq12
comp52258_c0_seq2 comp57664_c1_seq5
comp52258_c0_seq2 comp57683_c1_seq15
comp52258_c0_seq2 comp57747_c0_seq14
comp52258_c0_seq2 comp57829_c0_seq1
comp52258_c0_seq2 comp57861_c0_seq1
comp52258_c0_seq2 comp57876_c0_seq3
comp52258_c0_seq2 comp57909_c0_seq3
comp52258_c0_seq2 comp57910_c0_seq11
comp52258_c0_seq2 comp57972_c0_seq1
comp52258_c0_seq2 comp58194_c0_seq13
comp52258_c0_seq2 comp58387_c2_seq2
comp52258_c0_seq2 comp58396_c0_seq2
comp52258_c0_seq2 comp58604_c0_seq1
comp52258_c0_seq2 comp58623_c0_seq4
comp52258_c0_seq2 comp58719_c0_seq2
comp52258_c0_seq2 comp58819_c0_seq2
comp52258_c0_seq2 comp58992_c0_seq4
comp52258_c0_seq2 comp59014_c0_seq3
comp52258_c0_seq2 comp59027_c3_seq2
comp52258_c0_seq2 comp59120_c0_seq2
comp52258_c0_seq2 comp59167_c0_seq5
comp52258_c0_seq2 comp59185_c0_seq3
comp52258_c0_seq2 comp59253_c2_seq41
comp52258_c0_seq2 comp59262_c0_seq1
comp52258_c0_seq2 comp59381_c0_seq50
comp52258_c0_seq2 comp59386_c0_seq19
comp52258_c0_seq2 comp59399_c0_seq20
comp52258_c0_seq2 comp59439_c0_seq3
comp52258_c0_seq2 comp59548_c0_seq8
comp52258_c0_seq2 comp59562_c0_seq32
comp52258_c0_seq2 comp59572_c0_seq3
comp52258_c0_seq2 comp59583_c0_seq2
comp52258_c0_seq2 comp59601_c0_seq5
comp52258_c0_seq2 comp59647_c0_seq6
comp52258_c0_seq2 comp59748_c0_seq1
comp52258_c0_seq2 comp59757_c1_seq5
comp52258_c0_seq2 comp59786_c0_seq2
comp52258_c0_seq2 comp59815_c0_seq3
comp52258_c0_seq2 comp59822_c0_seq6
comp52258_c0_seq2 comp59868_c0_seq3
comp52258_c0_seq2 comp59875_c1_seq8
comp52258_c0_seq2 comp59942_c0_seq2
comp52258_c0_seq2 comp59986_c0_seq1
comp52258_c0_seq2 comp59987_c0_seq2
comp52258_c0_seq2 comp60007_c0_seq12
comp52258_c0_seq2 comp60080_c1_seq1
comp52258_c0_seq2 comp60091_c0_seq2
comp52258_c0_seq2 comp61454_c0_seq1
comp52258_c0_seq2 comp97705_c0_seq1
comp52273_c0_seq2 comp53237_c0_seq2
comp52273_c0_seq2 comp54559_c0_seq2
comp52273_c0_seq2 comp56084_c0_seq2
comp52287_c0_seq1 comp52922_c0_seq1
comp52287_c0_seq1 comp55225_c0_seq2
comp52287_c0_seq1 comp56406_c0_seq5
comp52287_c0_seq1 comp57540_c0_seq3
comp52287_c0_seq1 comp58604_c0_seq1
comp52287_c0_seq1 comp59629_c0_seq6
comp52299_c1_seq2 comp56809_c0_seq1
comp52317_c0_seq1 comp54580_c0_seq2
comp52317_c0_seq1 comp57793_c0_seq1
comp52345_c0_seq1 comp54327_c0_seq1
comp52345_c0_seq1 comp57097_c1_seq1
comp52358_c0_seq3 comp53988_c0_seq2
comp52358_c0_seq3 comp54172_c1_seq4
comp52358_c0_seq3 comp54679_c0_seq1
comp52358_c0_seq3 comp55138_c0_seq1
comp52358_c0_seq3 comp56180_c0_seq1
comp52358_c0_seq3 comp59031_c0_seq28
comp52358_c0_seq3 comp59309_c1_seq3
comp52368_c0_seq11 comp52795_c0_seq2
comp52368_c0_seq11 comp53051_c0_seq5
comp52368_c0_seq11 comp53526_c1_seq3
comp52368_c0_seq11 comp55536_c0_seq1
comp52368_c0_seq11 comp56008_c4_seq1
comp52368_c0_seq11 comp56631_c0_seq24
comp52368_c0_seq11 comp58724_c0_seq2
comp52368_c0_seq11 comp60981_c0_seq1
comp52380_c0_seq1 comp54580_c0_seq2
comp52403_c0_seq2 comp53237_c0_seq2
comp52403_c0_seq2 comp54559_c0_seq2
comp52403_c0_seq2 comp56084_c0_seq2
comp52409_c0_seq1 comp54580_c0_seq2
comp52409_c0_seq1 comp55850_c0_seq2
comp52409_c0_seq1 comp60232_c0_seq1
comp52413_c0_seq3 comp53304_c0_seq1
comp52413_c0_seq3 comp53461_c0_seq3
comp52413_c0_seq3 comp56297_c0_seq2
comp52413_c0_seq3 comp56911_c1_seq1
comp52413_c0_seq3 comp57148_c0_seq3
comp52413_c0_seq3 comp57260_c0_seq12
comp52413_c0_seq3 comp57625_c1_seq31
comp52413_c0_seq3 comp57857_c0_seq2
comp52413_c0_seq3 comp58770_c0_seq8
comp52413_c0_seq3 comp58824_c1_seq21
comp52413_c0_seq3 comp59497_c0_seq12
comp52413_c0_seq3 comp59807_c0_seq1
comp52414_c0_seq1 comp53237_c0_seq2
comp52414_c0_seq1 comp54559_c0_seq2
comp52414_c0_seq1 comp56084_c0_seq2
comp52414_c0_seq1 comp59711_c0_seq1
comp52433_c0_seq1 comp55825_c0_seq3
comp52433_c0_seq1 comp56012_c0_seq4
comp52433_c0_seq1 comp59227_c0_seq2
comp52437_c0_seq1 comp55370_c0_seq1
comp52437_c0_seq1 comp60593_c0_seq1
comp52437_c0_seq1 comp88928_c0_seq1
comp52444_c0_seq3 comp54644_c0_seq1
comp52455_c0_seq1 comp56831_c0_seq4
comp52470_c0_seq1 comp54736_c0_seq1
comp52470_c0_seq1 comp55394_c0_seq1
comp52470_c0_seq1 comp56073_c0_seq2
comp52470_c0_seq1 comp58387_c3_seq1
comp52470_c0_seq1 comp59801_c0_seq5
comp52474_c0_seq3 comp53237_c0_seq2
comp52474_c0_seq3 comp54559_c0_seq2
comp52474_c0_seq3 comp56084_c0_seq2
comp52478_c0_seq3 comp53237_c0_seq2
comp52478_c0_seq3 comp54559_c0_seq2
comp52478_c0_seq3 comp56084_c0_seq2
comp52478_c0_seq3 comp56152_c0_seq2
comp52478_c0_seq3 comp56442_c0_seq4
comp52478_c0_seq3 comp56554_c0_seq2
comp52478_c0_seq3 comp56809_c0_seq1
comp52478_c0_seq3 comp56829_c0_seq2
comp52478_c0_seq3 comp57477_c0_seq1
comp52478_c0_seq3 comp57552_c0_seq4
comp52478_c0_seq3 comp57615_c0_seq3
comp52478_c0_seq3 comp57771_c0_seq3
comp52478_c0_seq3 comp57909_c0_seq3
comp52478_c0_seq3 comp58334_c0_seq1
comp52478_c0_seq3 comp59291_c1_seq1
comp52478_c0_seq3 comp59339_c0_seq11
comp52478_c0_seq3 comp59607_c0_seq10
comp52487_c0_seq1 comp54616_c0_seq3
comp52487_c0_seq1 comp56297_c0_seq2
comp52487_c0_seq1 comp57148_c0_seq3
comp52487_c0_seq1 comp57260_c0_seq12
comp52487_c0_seq1 comp57625_c1_seq31
comp52487_c0_seq1 comp58770_c0_seq8
comp52487_c0_seq1 comp58824_c1_seq21
comp52487_c0_seq1 comp59497_c0_seq12
comp52501_c0_seq1 comp59489_c1_seq1
comp52511_c0_seq4 comp57719_c0_seq3
comp52513_c0_seq1 comp59745_c0_seq12
comp52514_c1_seq1 comp55779_c0_seq2
comp52514_c1_seq1 comp56015_c3_seq1
comp52514_c1_seq1 comp57300_c0_seq2
comp52514_c1_seq1 comp58146_c0_seq14
comp52514_c1_seq1 comp59082_c2_seq12
comp52514_c1_seq1 comp59978_c0_seq4
comp52518_c0_seq2 comp59027_c3_seq2
comp52523_c1_seq1 comp58794_c0_seq3
comp52523_c1_seq1 comp59328_c0_seq1
comp52526_c0_seq1 comp54580_c0_seq2
comp52533_c1_seq4 comp57864_c0_seq1
comp52540_c1_seq2 comp52776_c0_seq2
comp52540_c1_seq2 comp53237_c0_seq2
comp52540_c1_seq2 comp53999_c0_seq3
comp52540_c1_seq2 comp54559_c0_seq2
comp52540_c1_seq2 comp55700_c0_seq1
comp52540_c1_seq2 comp56084_c0_seq2
comp52540_c1_seq2 comp56101_c0_seq6
comp52540_c1_seq2 comp56536_c0_seq1
comp52540_c1_seq2 comp56692_c0_seq2
comp52540_c1_seq2 comp57227_c0_seq4
comp52540_c1_seq2 comp57972_c0_seq1
comp52540_c1_seq2 comp58464_c0_seq2
comp52540_c1_seq2 comp58714_c0_seq8
comp52540_c1_seq2 comp88082_c0_seq1
comp52562_c0_seq2 comp55206_c1_seq1
comp52562_c0_seq2 comp56732_c0_seq2
comp52562_c0_seq2 comp60161_c0_seq1
comp52562_c0_seq2 comp60533_c0_seq1
comp52575_c0_seq2 comp57857_c0_seq2
comp52581_c0_seq2 comp60097_c0_seq4
comp52588_c0_seq1 comp53237_c0_seq2
comp52588_c0_seq1 comp54559_c0_seq2
comp52588_c0_seq1 comp54580_c0_seq2
comp52588_c0_seq1 comp56084_c0_seq2
comp52588_c0_seq1 comp59082_c2_seq12
comp52598_c0_seq1 comp53046_c0_seq1
comp52598_c0_seq1 comp54912_c0_seq1
comp52598_c0_seq1 comp55588_c0_seq7
comp52598_c0_seq1 comp55596_c0_seq2
comp52598_c0_seq1 comp55696_c0_seq2
comp52598_c0_seq1 comp55707_c0_seq1
comp52598_c0_seq1 comp56548_c6_seq59
comp52598_c0_seq1 comp56885_c2_seq5
comp52598_c0_seq1 comp57145_c0_seq2
comp52598_c0_seq1 comp57592_c0_seq4
comp52598_c0_seq1 comp58244_c0_seq2
comp52598_c0_seq1 comp59658_c2_seq3
comp52598_c0_seq1 comp59770_c0_seq50
comp52598_c0_seq1 comp60102_c0_seq3
comp52619_c0_seq1 comp53300_c2_seq1
comp52619_c0_seq1 comp54472_c1_seq3
comp52619_c0_seq1 comp57988_c2_seq2
comp52619_c0_seq1 comp58345_c0_seq1
comp52619_c0_seq1 comp58666_c1_seq17
comp52619_c0_seq1 comp59339_c0_seq11
comp52619_c0_seq1 comp59448_c2_seq1
comp52619_c0_seq1 comp59542_c3_seq2
comp52625_c0_seq2 comp54580_c0_seq2
comp52673_c0_seq1 comp54580_c0_seq2
comp52674_c0_seq1 comp54580_c0_seq2
comp52677_c0_seq2 comp53050_c0_seq1
comp52677_c0_seq2 comp55298_c0_seq6
comp52677_c0_seq2 comp55899_c0_seq3
comp52677_c0_seq2 comp56355_c0_seq1
comp52677_c0_seq2 comp56523_c0_seq29
comp52677_c0_seq2 comp56565_c0_seq2
comp52677_c0_seq2 comp56809_c0_seq1
comp52677_c0_seq2 comp57552_c0_seq4
comp52677_c0_seq2 comp57615_c0_seq3
comp52677_c0_seq2 comp57851_c0_seq33
comp52677_c0_seq2 comp57909_c0_seq3
comp52677_c0_seq2 comp57912_c2_seq2
comp52677_c0_seq2 comp58308_c0_seq1
comp52677_c0_seq2 comp58354_c0_seq3
comp52677_c0_seq2 comp58397_c0_seq1
comp52677_c0_seq2 comp59339_c0_seq11
comp52677_c0_seq2 comp59537_c0_seq35
comp52677_c0_seq2 comp63552_c0_seq1
comp52694_c0_seq6 comp54580_c0_seq2
comp52695_c0_seq4 comp55729_c0_seq2
comp52695_c0_seq4 comp58137_c1_seq39
comp52695_c0_seq4 comp58422_c0_seq31
comp52700_c1_seq3 comp53237_c0_seq2
comp52700_c1_seq3 comp54559_c0_seq2
comp52700_c1_seq3 comp56084_c0_seq2
comp52700_c1_seq3 comp56355_c0_seq1
comp52700_c1_seq3 comp56995_c0_seq2
comp52714_c0_seq1 comp53237_c0_seq2
comp52714_c0_seq1 comp54559_c0_seq2
comp52714_c0_seq1 comp56084_c0_seq2
comp52729_c0_seq3 comp54007_c1_seq1
comp52729_c0_seq3 comp54580_c0_seq2
comp52729_c0_seq3 comp59242_c1_seq4
comp52730_c0_seq1 comp53533_c4_seq57
comp52730_c0_seq1 comp53664_c0_seq2
comp52730_c0_seq1 comp54288_c0_seq14
comp52730_c0_seq1 comp56152_c0_seq2
comp52730_c0_seq1 comp56554_c0_seq2
comp52730_c0_seq1 comp57782_c3_seq4
comp52730_c0_seq1 comp58792_c0_seq4
comp52730_c0_seq1 comp59034_c7_seq2
comp52730_c0_seq1 comp59291_c1_seq1
comp52730_c0_seq1 comp59306_c0_seq2
comp52745_c0_seq1 comp52776_c0_seq2
comp52745_c0_seq1 comp53237_c0_seq2
comp52745_c0_seq1 comp54559_c0_seq2
comp52745_c0_seq1 comp55754_c0_seq4
comp52745_c0_seq1 comp56084_c0_seq2
comp52745_c0_seq1 comp56256_c5_seq1
comp52745_c0_seq1 comp56293_c1_seq1
comp52745_c0_seq1 comp56762_c3_seq1
comp52745_c0_seq1 comp57149_c0_seq4
comp52745_c0_seq1 comp57311_c0_seq3
comp52745_c0_seq1 comp57612_c0_seq2
comp52745_c0_seq1 comp57812_c0_seq18
comp52745_c0_seq1 comp58396_c0_seq2
comp52745_c0_seq1 comp58915_c0_seq3
comp52745_c0_seq1 comp59120_c0_seq2
comp52745_c0_seq1 comp59167_c0_seq5
comp52745_c0_seq1 comp59390_c0_seq19
comp52745_c0_seq1 comp59562_c0_seq32
comp52745_c0_seq1 comp60080_c1_seq1
comp52755_c2_seq1 comp53237_c0_seq2
comp52755_c2_seq1 comp54559_c0_seq2
comp52755_c2_seq1 comp56008_c4_seq1
comp52755_c2_seq1 comp56084_c0_seq2
comp52755_c2_seq1 comp56631_c0_seq24
comp52771_c0_seq1 comp53256_c1_seq12
comp52771_c0_seq1 comp59165_c1_seq6
comp52771_c0_seq1 comp70289_c0_seq1
comp52776_c0_seq2 comp55700_c0_seq1
comp52776_c0_seq2 comp56101_c0_seq6
comp52776_c0_seq2 comp56536_c0_seq1
comp52776_c0_seq2 comp56762_c3_seq1
comp52776_c0_seq2 comp57227_c0_seq4
comp52776_c0_seq2 comp57612_c0_seq2
comp52776_c0_seq2 comp58396_c0_seq2
comp52776_c0_seq2 comp58714_c0_seq8
comp52776_c0_seq2 comp59120_c0_seq2
comp52776_c0_seq2 comp59562_c0_seq32
comp52776_c0_seq2 comp60080_c1_seq1
comp52778_c0_seq2 comp55354_c0_seq3
comp52778_c0_seq2 comp56579_c1_seq6
comp52791_c0_seq3 comp55286_c0_seq11
comp52791_c0_seq3 comp55533_c0_seq10
comp52791_c0_seq3 comp56607_c0_seq1
comp52791_c0_seq3 comp57800_c0_seq7
comp52793_c0_seq3 comp54503_c0_seq1
comp52793_c0_seq3 comp56526_c1_seq5
comp52793_c0_seq3 comp57384_c0_seq4
comp52793_c0_seq3 comp57634_c2_seq2
comp52793_c0_seq3 comp58061_c0_seq7
comp52793_c0_seq3 comp59157_c1_seq1
comp52795_c0_seq2 comp53051_c0_seq5
comp52795_c0_seq2 comp53139_c0_seq1
comp52795_c0_seq2 comp59235_c1_seq10
comp52795_c0_seq2 comp60981_c0_seq1
comp52796_c0_seq5 comp54580_c0_seq2
comp52808_c0_seq2 comp54146_c1_seq2
comp52808_c0_seq2 comp56406_c0_seq5
comp52808_c0_seq2 comp59629_c0_seq6
comp52812_c0_seq2 comp55030_c0_seq1
comp52812_c0_seq2 comp55263_c1_seq2
comp52812_c0_seq2 comp56523_c0_seq29
comp52812_c0_seq2 comp57552_c0_seq4
comp52812_c0_seq2 comp57615_c0_seq3
comp52812_c0_seq2 comp57909_c0_seq3
comp52816_c0_seq3 comp53409_c0_seq23
comp52816_c0_seq3 comp53897_c0_seq3
comp52816_c0_seq3 comp54740_c0_seq2
comp52827_c0_seq2 comp54877_c0_seq2
comp52827_c0_seq2 comp56688_c0_seq4
comp52827_c0_seq2 comp57239_c1_seq1
comp52827_c0_seq2 comp59875_c1_seq8
comp52853_c0_seq1 comp54912_c0_seq1
comp52853_c0_seq1 comp58244_c0_seq2
comp52853_c0_seq1 comp59658_c2_seq3
comp52869_c0_seq1 comp52938_c0_seq1
comp52870_c0_seq1 comp56804_c0_seq1
comp52877_c0_seq9 comp54119_c0_seq1
comp52877_c0_seq9 comp57618_c0_seq1
comp52913_c0_seq1 comp56297_c0_seq2
comp52913_c0_seq1 comp57148_c0_seq3
comp52913_c0_seq1 comp57260_c0_seq12
comp52913_c0_seq1 comp57625_c1_seq31
comp52913_c0_seq1 comp58770_c0_seq8
comp52913_c0_seq1 comp58824_c1_seq21
comp52913_c0_seq1 comp59497_c0_seq12
comp52922_c0_seq1 comp55225_c0_seq2
comp52922_c0_seq1 comp57540_c0_seq3
comp52922_c0_seq1 comp58604_c0_seq1
comp52923_c0_seq3 comp59021_c0_seq13
comp52934_c0_seq6 comp57214_c0_seq1
comp52934_c0_seq6 comp57903_c0_seq3
comp52938_c0_seq1 comp55796_c1_seq1
comp52938_c0_seq1 comp56248_c0_seq5
comp52938_c0_seq1 comp56482_c0_seq1
comp52938_c0_seq1 comp58066_c0_seq9
comp52938_c0_seq1 comp58342_c1_seq3
comp52938_c0_seq1 comp59366_c0_seq9
comp52955_c0_seq2 comp53237_c0_seq2
comp52955_c0_seq2 comp54559_c0_seq2
comp52955_c0_seq2 comp56084_c0_seq2
comp52956_c0_seq3 comp53514_c0_seq2
comp52956_c0_seq3 comp54270_c0_seq2
comp52956_c0_seq3 comp57189_c0_seq1
comp52956_c0_seq3 comp58299_c0_seq2
comp52956_c0_seq3 comp59489_c1_seq1
comp52958_c0_seq1 comp53905_c0_seq3
comp52958_c0_seq1 comp54146_c1_seq2
comp52958_c0_seq1 comp55873_c3_seq1
comp52958_c0_seq1 comp56406_c0_seq5
comp52958_c0_seq1 comp56818_c1_seq2
comp52958_c0_seq1 comp58137_c1_seq39
comp52958_c0_seq1 comp58422_c0_seq31
comp52958_c0_seq1 comp58422_c1_seq2
comp52958_c0_seq1 comp59625_c0_seq6
comp52958_c0_seq1 comp59629_c0_seq6
comp52977_c0_seq2 comp54035_c0_seq3
comp52977_c0_seq2 comp56442_c0_seq4
comp52977_c0_seq2 comp56523_c0_seq29
comp52977_c0_seq2 comp56598_c0_seq9
comp52977_c0_seq2 comp56781_c0_seq35
comp53013_c0_seq1 comp54503_c0_seq1
comp53013_c0_seq1 comp57384_c0_seq4
comp53013_c0_seq1 comp57634_c2_seq2
comp53013_c0_seq1 comp58061_c0_seq7
comp53013_c0_seq1 comp59157_c1_seq1
comp53045_c0_seq2 comp59138_c0_seq2
comp53046_c0_seq1 comp54610_c0_seq11
comp53046_c0_seq1 comp54856_c0_seq2
comp53046_c0_seq1 comp55866_c2_seq1
comp53046_c0_seq1 comp56559_c3_seq15
comp53046_c0_seq1 comp57058_c0_seq2
comp53050_c0_seq1 comp54035_c0_seq3
comp53050_c0_seq1 comp56009_c0_seq1
comp53050_c0_seq1 comp56355_c0_seq1
comp53050_c0_seq1 comp56809_c0_seq1
comp53050_c0_seq1 comp57615_c0_seq3
comp53050_c0_seq1 comp59339_c0_seq11
comp53051_c0_seq5 comp53526_c1_seq3
comp53051_c0_seq5 comp55536_c0_seq1
comp53051_c0_seq5 comp56008_c4_seq1
comp53051_c0_seq5 comp56631_c0_seq24
comp53051_c0_seq5 comp58724_c0_seq2
comp53051_c0_seq5 comp60981_c0_seq1
comp53058_c0_seq1 comp53545_c0_seq1
comp53058_c0_seq1 comp53664_c0_seq2
comp53058_c0_seq1 comp54673_c0_seq2
comp53058_c0_seq1 comp55420_c0_seq2
comp53058_c0_seq1 comp56291_c0_seq4
comp53058_c0_seq1 comp56589_c0_seq1
comp53058_c0_seq1 comp56809_c0_seq1
comp53058_c0_seq1 comp56817_c0_seq2
comp53058_c0_seq1 comp56951_c0_seq2
comp53058_c0_seq1 comp56977_c3_seq1
comp53058_c0_seq1 comp57021_c0_seq3
comp53058_c0_seq1 comp57478_c0_seq1
comp53058_c0_seq1 comp57518_c0_seq1
comp53058_c0_seq1 comp57864_c0_seq1
comp53058_c0_seq1 comp58049_c1_seq1
comp53058_c0_seq1 comp58151_c1_seq2
comp53058_c0_seq1 comp58308_c0_seq1
comp53058_c0_seq1 comp58345_c0_seq1
comp53058_c0_seq1 comp59219_c1_seq1
comp53058_c0_seq1 comp59937_c1_seq6
comp53058_c0_seq1 comp60158_c0_seq3
comp53068_c1_seq1 comp54580_c0_seq2
comp53082_c0_seq1 comp56809_c0_seq1
comp53102_c0_seq1 comp57696_c3_seq4
comp53129_c0_seq6 comp53958_c0_seq2
comp53129_c0_seq6 comp57972_c0_seq1
comp53139_c0_seq1 comp60981_c0_seq1
comp53143_c0_seq1 comp54912_c0_seq1
comp53143_c0_seq1 comp58244_c0_seq2
comp53143_c0_seq1 comp59658_c2_seq3
comp53152_c0_seq4 comp59330_c1_seq2
comp53177_c0_seq2 comp54503_c0_seq1
comp53177_c0_seq2 comp54736_c0_seq1
comp53177_c0_seq2 comp56073_c0_seq2
comp53177_c0_seq2 comp57384_c0_seq4
comp53177_c0_seq2 comp57634_c2_seq2
comp53177_c0_seq2 comp58061_c0_seq7
comp53177_c0_seq2 comp58387_c3_seq1
comp53177_c0_seq2 comp59157_c1_seq1
comp53185_c0_seq2 comp57348_c0_seq9
comp53185_c0_seq2 comp60086_c1_seq1
comp53198_c1_seq7 comp53960_c0_seq3
comp53198_c1_seq7 comp59680_c2_seq4
comp53198_c1_seq7 comp59715_c0_seq9
comp53220_c1_seq6 comp55030_c0_seq1
comp53220_c1_seq6 comp55263_c1_seq2
comp53220_c1_seq6 comp57552_c0_seq4
comp53220_c1_seq6 comp57909_c0_seq3
comp53237_c0_seq2 comp53335_c0_seq5
comp53237_c0_seq2 comp53353_c0_seq2
comp53237_c0_seq2 comp53452_c0_seq2
comp53237_c0_seq2 comp53870_c0_seq5
comp53237_c0_seq2 comp53944_c0_seq2
comp53237_c0_seq2 comp54003_c0_seq1
comp53237_c0_seq2 comp54035_c0_seq3
comp53237_c0_seq2 comp54149_c0_seq1
comp53237_c0_seq2 comp54217_c0_seq2
comp53237_c0_seq2 comp54424_c0_seq2
comp53237_c0_seq2 comp54477_c0_seq3
comp53237_c0_seq2 comp54559_c0_seq2
comp53237_c0_seq2 comp54771_c0_seq1
comp53237_c0_seq2 comp54813_c0_seq1
comp53237_c0_seq2 comp54877_c0_seq2
comp53237_c0_seq2 comp55030_c0_seq1
comp53237_c0_seq2 comp55225_c0_seq2
comp53237_c0_seq2 comp55231_c0_seq2
comp53237_c0_seq2 comp55237_c0_seq1
comp53237_c0_seq2 comp55263_c1_seq2
comp53237_c0_seq2 comp55318_c0_seq2
comp53237_c0_seq2 comp55541_c0_seq2
comp53237_c0_seq2 comp55602_c0_seq2
comp53237_c0_seq2 comp55700_c0_seq1
comp53237_c0_seq2 comp55732_c0_seq5
comp53237_c0_seq2 comp55764_c0_seq2
comp53237_c0_seq2 comp55820_c0_seq1
comp53237_c0_seq2 comp56084_c0_seq2
comp53237_c0_seq2 comp56158_c0_seq1
comp53237_c0_seq2 comp56287_c1_seq2
comp53237_c0_seq2 comp56372_c0_seq2
comp53237_c0_seq2 comp56380_c1_seq24
comp53237_c0_seq2 comp56427_c1_seq1
comp53237_c0_seq2 comp56489_c0_seq14
comp53237_c0_seq2 comp56536_c0_seq1
comp53237_c0_seq2 comp56620_c2_seq4
comp53237_c0_seq2 comp56688_c0_seq4
comp53237_c0_seq2 comp56739_c0_seq3
comp53237_c0_seq2 comp56759_c0_seq4
comp53237_c0_seq2 comp56762_c3_seq1
comp53237_c0_seq2 comp56794_c0_seq1
comp53237_c0_seq2 comp56798_c0_seq6
comp53237_c0_seq2 comp56861_c0_seq2
comp53237_c0_seq2 comp56916_c0_seq1
comp53237_c0_seq2 comp56930_c0_seq3
comp53237_c0_seq2 comp57017_c0_seq2
comp53237_c0_seq2 comp57069_c0_seq3
comp53237_c0_seq2 comp57097_c1_seq1
comp53237_c0_seq2 comp57109_c0_seq1
comp53237_c0_seq2 comp57149_c0_seq4
comp53237_c0_seq2 comp57210_c0_seq2
comp53237_c0_seq2 comp57226_c1_seq1
comp53237_c0_seq2 comp57227_c0_seq4
comp53237_c0_seq2 comp57237_c0_seq80
comp53237_c0_seq2 comp57239_c1_seq1
comp53237_c0_seq2 comp57292_c1_seq2
comp53237_c0_seq2 comp57434_c1_seq25
comp53237_c0_seq2 comp57540_c0_seq3
comp53237_c0_seq2 comp57552_c0_seq4
comp53237_c0_seq2 comp57609_c0_seq1
comp53237_c0_seq2 comp57612_c0_seq2
comp53237_c0_seq2 comp57627_c1_seq6
comp53237_c0_seq2 comp57649_c0_seq12
comp53237_c0_seq2 comp57664_c1_seq5
comp53237_c0_seq2 comp57683_c1_seq15
comp53237_c0_seq2 comp57747_c0_seq14
comp53237_c0_seq2 comp57829_c0_seq1
comp53237_c0_seq2 comp57861_c0_seq1
comp53237_c0_seq2 comp57876_c0_seq3
comp53237_c0_seq2 comp57909_c0_seq3
comp53237_c0_seq2 comp57910_c0_seq11
comp53237_c0_seq2 comp57972_c0_seq1
comp53237_c0_seq2 comp58194_c0_seq13
comp53237_c0_seq2 comp58387_c2_seq2
comp53237_c0_seq2 comp58396_c0_seq2
comp53237_c0_seq2 comp58604_c0_seq1
comp53237_c0_seq2 comp58623_c0_seq4
comp53237_c0_seq2 comp58719_c0_seq2
comp53237_c0_seq2 comp58819_c0_seq2
comp53237_c0_seq2 comp58992_c0_seq4
comp53237_c0_seq2 comp59014_c0_seq3
comp53237_c0_seq2 comp59027_c3_seq2
comp53237_c0_seq2 comp59120_c0_seq2
comp53237_c0_seq2 comp59167_c0_seq5
comp53237_c0_seq2 comp59185_c0_seq3
comp53237_c0_seq2 comp59253_c2_seq41
comp53237_c0_seq2 comp59262_c0_seq1
comp53237_c0_seq2 comp59381_c0_seq50
comp53237_c0_seq2 comp59386_c0_seq19
comp53237_c0_seq2 comp59399_c0_seq20
comp53237_c0_seq2 comp59439_c0_seq3
comp53237_c0_seq2 comp59548_c0_seq8
comp53237_c0_seq2 comp59562_c0_seq32
comp53237_c0_seq2 comp59572_c0_seq3
comp53237_c0_seq2 comp59583_c0_seq2
comp53237_c0_seq2 comp59601_c0_seq5
comp53237_c0_seq2 comp59647_c0_seq6
comp53237_c0_seq2 comp59748_c0_seq1
comp53237_c0_seq2 comp59757_c1_seq5
comp53237_c0_seq2 comp59786_c0_seq2
comp53237_c0_seq2 comp59815_c0_seq3
comp53237_c0_seq2 comp59822_c0_seq6
comp53237_c0_seq2 comp59868_c0_seq3
comp53237_c0_seq2 comp59875_c1_seq8
comp53237_c0_seq2 comp59942_c0_seq2
comp53237_c0_seq2 comp59986_c0_seq1
comp53237_c0_seq2 comp59987_c0_seq2
comp53237_c0_seq2 comp60007_c0_seq12
comp53237_c0_seq2 comp60080_c1_seq1
comp53237_c0_seq2 comp60091_c0_seq2
comp53237_c0_seq2 comp61454_c0_seq1
comp53237_c0_seq2 comp97705_c0_seq1
comp53240_c0_seq2 comp54035_c0_seq3
comp53240_c0_seq2 comp57123_c0_seq5
comp53240_c0_seq2 comp57909_c0_seq3
comp53256_c1_seq12 comp54372_c0_seq18
comp53256_c1_seq12 comp54599_c0_seq3
comp53256_c1_seq12 comp55556_c0_seq1
comp53256_c1_seq12 comp55939_c0_seq3
comp53256_c1_seq12 comp56103_c0_seq11
comp53296_c0_seq3 comp55237_c0_seq1
comp53296_c0_seq3 comp55438_c3_seq1
comp53296_c0_seq3 comp56287_c1_seq2
comp53296_c0_seq3 comp57746_c0_seq1
comp53296_c0_seq3 comp57829_c0_seq1
comp53296_c0_seq3 comp59601_c0_seq5
comp53300_c2_seq1 comp54472_c1_seq3
comp53300_c2_seq1 comp55681_c0_seq1
comp53300_c2_seq1 comp58666_c1_seq17
comp53300_c2_seq1 comp59448_c2_seq1
comp53300_c2_seq1 comp59542_c3_seq2
comp53301_c0_seq2 comp54580_c0_seq2
comp53303_c0_seq4 comp59202_c1_seq9
comp53304_c0_seq1 comp54858_c0_seq2
comp53304_c0_seq1 comp56404_c3_seq10
comp53304_c0_seq1 comp57883_c0_seq6
comp53304_c0_seq1 comp58069_c0_seq22
comp53328_c0_seq4 comp55442_c0_seq1
comp53335_c0_seq5 comp54559_c0_seq2
comp53335_c0_seq5 comp56084_c0_seq2
comp53345_c0_seq4 comp57008_c0_seq1
comp53346_c0_seq2 comp54146_c1_seq2
comp53346_c0_seq2 comp56406_c0_seq5
comp53346_c0_seq2 comp59629_c0_seq6
comp53353_c0_seq2 comp54559_c0_seq2
comp53353_c0_seq2 comp56084_c0_seq2
comp53353_c0_seq2 comp58855_c1_seq15
comp53359_c0_seq3 comp59650_c1_seq1
comp53391_c0_seq2 comp54827_c0_seq1
comp53391_c0_seq2 comp58230_c0_seq19
comp53391_c0_seq2 comp58926_c2_seq3
comp53391_c0_seq2 comp59503_c2_seq1
comp53401_c0_seq1 comp56355_c0_seq1
comp53401_c0_seq1 comp58393_c0_seq7
comp53401_c0_seq1 comp59300_c0_seq20
comp53409_c0_seq23 comp53897_c0_seq3
comp53415_c1_seq2 comp55438_c3_seq1
comp53415_c1_seq2 comp56202_c0_seq2
comp53425_c0_seq1 comp54327_c0_seq1
comp53425_c0_seq1 comp57097_c1_seq1
comp53442_c0_seq1 comp58393_c0_seq7
comp53442_c0_seq1 comp59138_c0_seq2
comp53442_c0_seq1 comp59300_c0_seq20
comp53452_c0_seq2 comp54559_c0_seq2
comp53452_c0_seq2 comp56084_c0_seq2
comp53452_c0_seq2 comp56282_c0_seq2
comp53452_c0_seq2 comp57017_c0_seq2
comp53452_c0_seq2 comp58157_c0_seq2
comp53452_c0_seq2 comp59027_c3_seq2
comp53461_c0_seq3 comp54858_c0_seq2
comp53461_c0_seq3 comp56404_c3_seq10
comp53461_c0_seq3 comp57883_c0_seq6
comp53461_c0_seq3 comp58069_c0_seq22
comp53468_c0_seq7 comp55681_c0_seq1
comp53469_c0_seq6 comp55298_c0_seq6
comp53469_c0_seq6 comp55899_c0_seq3
comp53469_c0_seq6 comp56809_c0_seq1
comp53474_c0_seq4 comp54035_c0_seq3
comp53499_c0_seq1 comp53995_c2_seq1
comp53499_c0_seq1 comp56070_c0_seq14
comp53499_c0_seq1 comp58137_c1_seq39
comp53499_c0_seq1 comp58422_c0_seq31
comp53501_c0_seq3 comp59219_c1_seq1
comp53508_c0_seq1 comp53637_c0_seq1
comp53508_c0_seq1 comp54912_c0_seq1
comp53508_c0_seq1 comp56879_c0_seq1
comp53508_c0_seq1 comp58244_c0_seq2
comp53508_c0_seq1 comp59658_c2_seq3
comp53514_c0_seq2 comp59489_c1_seq1
comp53514_c0_seq2 comp60842_c0_seq1
comp53526_c1_seq3 comp55536_c0_seq1
comp53526_c1_seq3 comp60981_c0_seq1
comp53527_c0_seq1 comp55770_c0_seq3
comp53527_c0_seq1 comp56829_c0_seq2
comp53533_c4_seq57 comp54480_c0_seq1
comp53533_c4_seq57 comp58151_c1_seq2
comp53533_c4_seq57 comp59306_c0_seq2
comp53533_c4_seq57 comp60161_c0_seq1
comp53553_c1_seq9 comp54580_c0_seq2
comp53562_c0_seq1 comp54035_c0_seq3
comp53562_c0_seq1 comp56809_c0_seq1
comp53570_c0_seq5 comp54580_c0_seq2
comp53575_c0_seq1 comp55482_c0_seq2
comp53578_c0_seq1 comp62471_c0_seq1
comp53593_c0_seq4 comp56526_c1_seq5
comp53597_c0_seq1 comp55030_c0_seq1
comp53597_c0_seq1 comp55263_c1_seq2
comp53597_c0_seq1 comp57552_c0_seq4
comp53597_c0_seq1 comp57909_c0_seq3
comp53599_c0_seq3 comp55658_c0_seq2
comp53599_c0_seq3 comp58794_c0_seq3
comp53599_c0_seq3 comp59328_c0_seq1
comp53633_c0_seq1 comp59578_c0_seq3
comp53637_c0_seq1 comp54554_c1_seq1
comp53637_c0_seq1 comp56879_c0_seq1
comp53637_c0_seq1 comp56927_c0_seq1
comp53637_c0_seq1 comp58434_c0_seq1
comp53640_c0_seq1 comp58182_c0_seq16
comp53659_c0_seq1 comp59309_c1_seq3
comp53664_c0_seq2 comp54035_c0_seq3
comp53664_c0_seq2 comp56009_c0_seq1
comp53664_c0_seq2 comp56152_c0_seq2
comp53664_c0_seq2 comp56554_c0_seq2
comp53664_c0_seq2 comp56598_c0_seq9
comp53664_c0_seq2 comp56809_c0_seq1
comp53664_c0_seq2 comp56829_c0_seq2
comp53664_c0_seq2 comp56951_c0_seq2
comp53664_c0_seq2 comp57123_c0_seq5
comp53664_c0_seq2 comp57518_c0_seq1
comp53664_c0_seq2 comp57552_c0_seq4
comp53664_c0_seq2 comp57615_c0_seq3
comp53664_c0_seq2 comp57864_c0_seq1
comp53664_c0_seq2 comp57909_c0_seq3
comp53664_c0_seq2 comp58345_c0_seq1
comp53664_c0_seq2 comp59219_c1_seq1
comp53688_c0_seq5 comp54508_c0_seq2
comp53698_c0_seq2 comp53960_c0_seq3
comp53698_c0_seq2 comp53995_c1_seq4
comp53698_c0_seq2 comp54010_c0_seq1
comp53698_c0_seq2 comp55681_c0_seq1
comp53698_c0_seq2 comp57793_c0_seq1
comp53698_c0_seq2 comp57862_c0_seq3
comp53698_c0_seq2 comp59650_c1_seq1
comp53698_c0_seq2 comp59664_c0_seq2
comp53698_c0_seq2 comp59680_c2_seq4
comp53698_c0_seq2 comp59715_c0_seq9
comp53738_c0_seq1 comp57864_c0_seq1
comp53754_c0_seq2 comp56589_c0_seq1
comp53754_c0_seq2 comp59966_c0_seq1
comp53759_c0_seq1 comp54256_c0_seq1
comp53759_c0_seq1 comp58333_c0_seq1
comp53759_c0_seq1 comp59962_c1_seq1
comp53767_c0_seq2 comp53937_c0_seq3
comp53767_c0_seq2 comp56939_c2_seq7
comp53767_c0_seq2 comp57873_c0_seq12
comp53767_c0_seq2 comp58659_c0_seq1
comp53768_c0_seq4 comp57476_c2_seq3
comp53785_c0_seq8 comp60011_c1_seq2
comp53814_c0_seq16 comp56009_c0_seq1
comp53814_c0_seq16 comp56523_c0_seq29
comp53814_c0_seq16 comp58350_c3_seq16
comp53814_c0_seq16 comp59339_c0_seq11
comp53815_c0_seq1 comp56008_c4_seq1
comp53819_c0_seq1 comp57476_c2_seq3
comp53828_c0_seq1 comp55681_c0_seq1
comp53828_c0_seq1 comp59650_c1_seq1
comp53828_c0_seq1 comp60119_c0_seq15
comp53828_c0_seq1 comp62471_c0_seq1
comp53831_c0_seq3 comp56526_c1_seq5
comp53831_c0_seq3 comp58271_c0_seq1
comp53831_c0_seq3 comp59219_c1_seq1
comp53858_c0_seq4 comp54580_c0_seq2
comp53859_c0_seq1 comp56015_c3_seq1
comp53867_c0_seq1 comp59555_c2_seq4
comp53867_c0_seq1 comp59636_c0_seq3
comp53867_c0_seq1 comp59649_c0_seq28
comp53870_c0_seq5 comp54559_c0_seq2
comp53870_c0_seq5 comp56084_c0_seq2
comp53871_c0_seq11 comp56011_c0_seq12
comp53871_c0_seq11 comp56132_c0_seq4
comp53885_c1_seq2 comp55030_c0_seq1
comp53885_c1_seq2 comp55263_c1_seq2
comp53885_c1_seq2 comp57552_c0_seq4
comp53885_c1_seq2 comp57909_c0_seq3
comp53891_c0_seq2 comp55533_c0_seq10
comp53891_c0_seq2 comp56607_c0_seq1
comp53900_c0_seq1 comp54580_c0_seq2
comp53900_c0_seq1 comp59027_c3_seq2
comp53905_c0_seq3 comp54717_c0_seq4
comp53909_c1_seq2 comp56009_c0_seq1
comp53916_c0_seq1 comp54107_c0_seq2
comp53916_c0_seq1 comp56282_c0_seq2
comp53916_c0_seq1 comp59994_c0_seq8
comp53917_c1_seq1 comp54580_c0_seq2
comp53917_c1_seq1 comp59034_c7_seq2
comp53930_c1_seq1 comp54213_c1_seq1
comp53930_c1_seq1 comp55030_c0_seq1
comp53930_c1_seq1 comp55263_c1_seq2
comp53930_c1_seq1 comp56995_c0_seq2
comp53930_c1_seq1 comp57552_c0_seq4
comp53930_c1_seq1 comp57909_c0_seq3
comp53937_c0_seq3 comp56939_c2_seq7
comp53937_c0_seq3 comp57873_c0_seq12
comp53944_c0_seq2 comp54559_c0_seq2
comp53944_c0_seq2 comp56084_c0_seq2
comp53944_c0_seq2 comp59924_c0_seq1
comp53955_c0_seq2 comp54765_c0_seq1
comp53955_c0_seq2 comp55354_c0_seq3
comp53955_c0_seq2 comp56579_c1_seq6
comp53958_c0_seq2 comp56555_c0_seq15
comp53960_c0_seq3 comp54355_c0_seq2
comp53960_c0_seq3 comp54380_c0_seq4
comp53960_c0_seq3 comp55175_c0_seq8
comp53960_c0_seq3 comp56142_c0_seq4
comp53960_c0_seq3 comp56933_c0_seq2
comp53960_c0_seq3 comp57084_c0_seq6
comp53960_c0_seq3 comp57535_c2_seq1
comp53960_c0_seq3 comp57764_c0_seq4
comp53960_c0_seq3 comp57793_c0_seq1
comp53960_c0_seq3 comp58691_c0_seq12
comp53960_c0_seq3 comp59227_c0_seq2
comp53960_c0_seq3 comp59680_c2_seq4
comp53960_c0_seq3 comp59715_c0_seq9
comp53960_c0_seq3 comp6676_c0_seq1
comp53960_c0_seq3 comp8850_c0_seq1
comp53967_c0_seq3 comp59994_c0_seq8
comp53977_c0_seq1 comp54580_c0_seq2
comp53983_c0_seq43 comp56270_c0_seq1
comp53988_c0_seq2 comp54172_c1_seq4
comp53988_c0_seq2 comp54679_c0_seq1
comp53988_c0_seq2 comp55138_c0_seq1
comp53988_c0_seq2 comp55379_c1_seq2
comp53988_c0_seq2 comp56180_c0_seq1
comp53988_c0_seq2 comp59031_c0_seq28
comp53988_c0_seq2 comp59309_c1_seq3
comp53994_c0_seq1 comp57783_c0_seq1
comp53995_c1_seq4 comp57972_c0_seq1
comp53995_c2_seq1 comp57031_c0_seq1
comp53996_c0_seq2 comp59138_c0_seq2
comp53999_c0_seq3 comp55700_c0_seq1
comp53999_c0_seq3 comp56101_c0_seq6
comp53999_c0_seq3 comp56536_c0_seq1
comp53999_c0_seq3 comp57227_c0_seq4
comp53999_c0_seq3 comp58714_c0_seq8
comp54003_c0_seq1 comp54559_c0_seq2
comp54003_c0_seq1 comp54580_c0_seq2
comp54003_c0_seq1 comp56084_c0_seq2
comp54003_c0_seq1 comp59082_c2_seq12
comp54007_c1_seq1 comp58255_c3_seq6
comp54021_c0_seq2 comp56589_c0_seq1
comp54035_c0_seq3 comp54559_c0_seq2
comp54035_c0_seq3 comp55796_c1_seq1
comp54035_c0_seq3 comp55884_c0_seq14
comp54035_c0_seq3 comp56027_c0_seq4
comp54035_c0_seq3 comp56084_c0_seq2
comp54035_c0_seq3 comp56152_c0_seq2
comp54035_c0_seq3 comp56154_c0_seq3
comp54035_c0_seq3 comp56230_c0_seq2
comp54035_c0_seq3 comp56554_c0_seq2
comp54035_c0_seq3 comp56565_c0_seq2
comp54035_c0_seq3 comp56809_c0_seq1
comp54035_c0_seq3 comp57029_c0_seq2
comp54035_c0_seq3 comp57123_c0_seq5
comp54035_c0_seq3 comp57615_c0_seq3
comp54035_c0_seq3 comp57912_c2_seq2
comp54035_c0_seq3 comp58151_c1_seq2
comp54035_c0_seq3 comp58354_c0_seq3
comp54035_c0_seq3 comp58391_c0_seq4
comp54035_c0_seq3 comp58397_c0_seq1
comp54035_c0_seq3 comp59001_c0_seq5
comp54035_c0_seq3 comp59129_c0_seq1
comp54035_c0_seq3 comp59339_c0_seq11
comp54035_c0_seq3 comp59376_c0_seq20
comp54035_c0_seq3 comp59555_c2_seq4
comp54035_c0_seq3 comp59636_c0_seq3
comp54035_c0_seq3 comp59649_c0_seq28
comp54035_c0_seq3 comp60135_c0_seq6
comp54045_c0_seq3 comp55962_c0_seq2
comp54045_c0_seq3 comp57864_c0_seq1
comp54045_c0_seq3 comp58049_c1_seq1
comp54045_c0_seq3 comp59219_c1_seq1
comp54058_c0_seq2 comp54503_c0_seq1
comp54058_c0_seq2 comp56526_c1_seq5
comp54058_c0_seq2 comp57384_c0_seq4
comp54058_c0_seq2 comp57634_c2_seq2
comp54058_c0_seq2 comp58061_c0_seq7
comp54058_c0_seq2 comp59157_c1_seq1
comp54073_c0_seq1 comp58334_c0_seq1
comp54082_c0_seq1 comp55482_c0_seq2
comp54082_c0_seq1 comp57247_c0_seq13
comp54084_c0_seq3 comp54827_c0_seq1
comp54084_c0_seq3 comp58230_c0_seq19
comp54084_c0_seq3 comp58926_c2_seq3
comp54084_c0_seq3 comp59503_c2_seq1
comp54107_c0_seq2 comp56282_c0_seq2
comp54107_c0_seq2 comp59994_c0_seq8
comp54116_c0_seq2 comp58230_c0_seq19
comp54119_c0_seq1 comp55536_c1_seq1
comp54119_c0_seq1 comp57618_c0_seq1
comp54146_c1_seq2 comp54214_c0_seq1
comp54146_c1_seq2 comp54717_c0_seq4
comp54146_c1_seq2 comp55806_c0_seq2
comp54146_c1_seq2 comp55973_c0_seq1
comp54146_c1_seq2 comp56236_c0_seq5
comp54146_c1_seq2 comp56809_c0_seq1
comp54146_c1_seq2 comp57187_c0_seq1
comp54146_c1_seq2 comp58330_c0_seq10
comp54146_c1_seq2 comp58478_c1_seq2
comp54146_c1_seq2 comp59369_c0_seq4
comp54146_c1_seq2 comp60107_c0_seq11
comp54149_c0_seq1 comp54559_c0_seq2
comp54149_c0_seq1 comp56084_c0_seq2
comp54149_c0_seq1 comp59362_c0_seq1
comp54162_c0_seq1 comp56727_c0_seq1
comp54162_c0_seq1 comp56911_c1_seq1
comp54162_c0_seq1 comp58402_c1_seq1
comp54162_c0_seq1 comp59807_c0_seq1
comp54162_c0_seq1 comp96305_c0_seq1
comp54166_c0_seq4 comp59862_c0_seq7
comp54172_c1_seq4 comp54679_c0_seq1
comp54172_c1_seq4 comp55138_c0_seq1
comp54172_c1_seq4 comp56180_c0_seq1
comp54176_c0_seq2 comp57801_c0_seq1
comp54176_c0_seq2 comp58752_c0_seq3
comp54184_c0_seq8 comp55729_c0_seq2
comp54184_c0_seq8 comp58137_c1_seq39
comp54184_c0_seq8 comp58422_c0_seq31
comp54189_c0_seq3 comp58859_c0_seq17
comp54189_c0_seq3 comp59650_c1_seq1
comp54211_c1_seq1 comp54325_c0_seq1
comp54211_c1_seq1 comp54352_c0_seq2
comp54211_c1_seq1 comp54644_c0_seq1
comp54211_c1_seq1 comp55704_c1_seq4
comp54211_c1_seq1 comp56070_c0_seq14
comp54214_c0_seq1 comp56406_c0_seq5
comp54214_c0_seq1 comp59629_c0_seq6
comp54217_c0_seq2 comp54559_c0_seq2
comp54217_c0_seq2 comp56084_c0_seq2
comp54222_c0_seq2 comp58409_c0_seq6
comp54228_c3_seq8 comp54810_c0_seq2
comp54228_c3_seq8 comp56497_c0_seq7
comp54228_c3_seq8 comp59937_c1_seq6
comp54231_c0_seq11 comp58819_c0_seq2
comp54231_c0_seq11 comp59647_c0_seq6
comp54251_c0_seq1 comp59339_c0_seq11
comp54256_c0_seq1 comp54580_c0_seq2
comp54270_c0_seq2 comp54580_c0_seq2
comp54270_c0_seq2 comp59489_c1_seq1
comp54288_c0_seq14 comp56152_c0_seq2
comp54288_c0_seq14 comp56554_c0_seq2
comp54288_c0_seq14 comp57782_c3_seq4
comp54288_c0_seq14 comp59034_c7_seq2
comp54288_c0_seq14 comp59291_c1_seq1
comp54290_c0_seq4 comp59811_c1_seq2
comp54291_c1_seq1 comp54912_c0_seq1
comp54291_c1_seq1 comp58244_c0_seq2
comp54291_c1_seq1 comp59658_c2_seq3
comp54302_c0_seq2 comp54580_c0_seq2
comp54316_c0_seq5 comp54483_c0_seq2
comp54316_c0_seq5 comp58049_c1_seq1
comp54316_c0_seq5 comp59219_c1_seq1
comp54325_c0_seq1 comp54644_c0_seq1
comp54327_c0_seq1 comp54580_c0_seq2
comp54327_c0_seq1 comp55030_c0_seq1
comp54327_c0_seq1 comp55263_c1_seq2
comp54327_c0_seq1 comp55766_c0_seq9
comp54327_c0_seq1 comp56526_c1_seq5
comp54327_c0_seq1 comp57552_c0_seq4
comp54327_c0_seq1 comp57909_c0_seq3
comp54327_c0_seq1 comp58794_c0_seq3
comp54327_c0_seq1 comp58859_c0_seq17
comp54327_c0_seq1 comp59227_c0_seq2
comp54327_c0_seq1 comp59328_c0_seq1
comp54327_c0_seq1 comp59650_c1_seq1
comp54348_c0_seq2 comp57045_c0_seq4
comp54352_c0_seq2 comp56687_c0_seq19
comp54355_c0_seq2 comp59680_c2_seq4
comp54355_c0_seq2 comp59715_c0_seq9
comp54356_c0_seq2 comp56152_c0_seq2
comp54356_c0_seq2 comp56554_c0_seq2
comp54372_c0_seq18 comp59165_c1_seq6
comp54372_c0_seq18 comp70289_c0_seq1
comp54380_c0_seq4 comp59680_c2_seq4
comp54380_c0_seq4 comp59715_c0_seq9
comp54422_c0_seq1 comp54580_c0_seq2
comp54424_c0_seq2 comp54559_c0_seq2
comp54424_c0_seq2 comp56084_c0_seq2
comp54443_c0_seq9 comp56467_c1_seq3
comp54443_c0_seq9 comp59381_c0_seq50
comp54456_c0_seq5 comp56355_c0_seq1
comp54463_c1_seq2 comp56096_c0_seq3
comp54467_c0_seq2 comp55480_c0_seq4
comp54467_c0_seq2 comp59138_c0_seq2
comp54467_c0_seq2 comp59395_c0_seq1
comp54472_c1_seq3 comp56589_c0_seq1
comp54472_c1_seq3 comp58666_c1_seq17
comp54472_c1_seq3 comp59542_c3_seq2
comp54477_c0_seq3 comp54559_c0_seq2
comp54477_c0_seq3 comp56084_c0_seq2
comp54480_c0_seq1 comp57909_c0_seq3
comp54483_c0_seq2 comp58049_c1_seq1
comp54483_c0_seq2 comp59219_c1_seq1
comp54487_c0_seq1 comp54851_c0_seq1
comp54487_c0_seq1 comp54851_c2_seq26
comp54503_c0_seq1 comp54637_c0_seq3
comp54503_c0_seq1 comp54736_c0_seq1
comp54503_c0_seq1 comp55436_c1_seq6
comp54503_c0_seq1 comp55907_c0_seq2
comp54503_c0_seq1 comp56073_c0_seq2
comp54503_c0_seq1 comp56218_c0_seq3
comp54503_c0_seq1 comp56518_c1_seq3
comp54503_c0_seq1 comp56873_c0_seq3
comp54503_c0_seq1 comp56965_c1_seq3
comp54503_c0_seq1 comp57190_c1_seq4
comp54503_c0_seq1 comp57304_c0_seq5
comp54503_c0_seq1 comp57489_c1_seq3
comp54503_c0_seq1 comp57716_c0_seq1
comp54503_c0_seq1 comp57844_c2_seq2
comp54503_c0_seq1 comp58139_c0_seq2
comp54503_c0_seq1 comp58221_c0_seq7
comp54503_c0_seq1 comp58292_c0_seq2
comp54503_c0_seq1 comp58427_c0_seq2
comp54503_c0_seq1 comp58464_c0_seq2
comp54503_c0_seq1 comp58572_c0_seq1
comp54503_c0_seq1 comp58794_c0_seq3
comp54503_c0_seq1 comp58824_c1_seq21
comp54503_c0_seq1 comp59022_c2_seq20
comp54503_c0_seq1 comp59227_c0_seq2
comp54503_c0_seq1 comp59328_c0_seq1
comp54503_c0_seq1 comp59650_c1_seq1
comp54503_c0_seq1 comp59995_c1_seq7
comp54503_c0_seq1 comp60005_c0_seq10
comp54510_c0_seq1 comp54580_c0_seq2
comp54511_c0_seq1 comp58835_c0_seq3
comp54524_c0_seq3 comp57864_c0_seq1
comp54547_c0_seq1 comp59862_c0_seq7
comp54554_c1_seq1 comp54912_c0_seq1
comp54554_c1_seq1 comp56879_c0_seq1
comp54554_c1_seq1 comp58244_c0_seq2
comp54554_c1_seq1 comp59658_c2_seq3
comp54559_c0_seq2 comp54771_c0_seq1
comp54559_c0_seq2 comp54813_c0_seq1
comp54559_c0_seq2 comp54877_c0_seq2
comp54559_c0_seq2 comp55030_c0_seq1
comp54559_c0_seq2 comp55225_c0_seq2
comp54559_c0_seq2 comp55231_c0_seq2
comp54559_c0_seq2 comp55237_c0_seq1
comp54559_c0_seq2 comp55263_c1_seq2
comp54559_c0_seq2 comp55318_c0_seq2
comp54559_c0_seq2 comp55541_c0_seq2
comp54559_c0_seq2 comp55602_c0_seq2
comp54559_c0_seq2 comp55700_c0_seq1
comp54559_c0_seq2 comp55732_c0_seq5
comp54559_c0_seq2 comp55764_c0_seq2
comp54559_c0_seq2 comp55820_c0_seq1
comp54559_c0_seq2 comp56084_c0_seq2
comp54559_c0_seq2 comp56158_c0_seq1
comp54559_c0_seq2 comp56287_c1_seq2
comp54559_c0_seq2 comp56372_c0_seq2
comp54559_c0_seq2 comp56380_c1_seq24
comp54559_c0_seq2 comp56427_c1_seq1
comp54559_c0_seq2 comp56489_c0_seq14
comp54559_c0_seq2 comp56536_c0_seq1
comp54559_c0_seq2 comp56620_c2_seq4
comp54559_c0_seq2 comp56688_c0_seq4
comp54559_c0_seq2 comp56739_c0_seq3
comp54559_c0_seq2 comp56759_c0_seq4
comp54559_c0_seq2 comp56762_c3_seq1
comp54559_c0_seq2 comp56794_c0_seq1
comp54559_c0_seq2 comp56798_c0_seq6
comp54559_c0_seq2 comp56861_c0_seq2
comp54559_c0_seq2 comp56916_c0_seq1
comp54559_c0_seq2 comp56930_c0_seq3
comp54559_c0_seq2 comp57017_c0_seq2
comp54559_c0_seq2 comp57069_c0_seq3
comp54559_c0_seq2 comp57097_c1_seq1
comp54559_c0_seq2 comp57109_c0_seq1
comp54559_c0_seq2 comp57149_c0_seq4
comp54559_c0_seq2 comp57210_c0_seq2
comp54559_c0_seq2 comp57226_c1_seq1
comp54559_c0_seq2 comp57227_c0_seq4
comp54559_c0_seq2 comp57237_c0_seq80
comp54559_c0_seq2 comp57239_c1_seq1
comp54559_c0_seq2 comp57292_c1_seq2
comp54559_c0_seq2 comp57434_c1_seq25
comp54559_c0_seq2 comp57540_c0_seq3
comp54559_c0_seq2 comp57552_c0_seq4
comp54559_c0_seq2 comp57609_c0_seq1
comp54559_c0_seq2 comp57612_c0_seq2
comp54559_c0_seq2 comp57627_c1_seq6
comp54559_c0_seq2 comp57649_c0_seq12
comp54559_c0_seq2 comp57664_c1_seq5
comp54559_c0_seq2 comp57683_c1_seq15
comp54559_c0_seq2 comp57747_c0_seq14
comp54559_c0_seq2 comp57829_c0_seq1
comp54559_c0_seq2 comp57861_c0_seq1
comp54559_c0_seq2 comp57876_c0_seq3
comp54559_c0_seq2 comp57909_c0_seq3
comp54559_c0_seq2 comp57910_c0_seq11
comp54559_c0_seq2 comp57972_c0_seq1
comp54559_c0_seq2 comp58194_c0_seq13
comp54559_c0_seq2 comp58387_c2_seq2
comp54559_c0_seq2 comp58396_c0_seq2
comp54559_c0_seq2 comp58604_c0_seq1
comp54559_c0_seq2 comp58623_c0_seq4
comp54559_c0_seq2 comp58719_c0_seq2
comp54559_c0_seq2 comp58819_c0_seq2
comp54559_c0_seq2 comp58992_c0_seq4
comp54559_c0_seq2 comp59014_c0_seq3
comp54559_c0_seq2 comp59027_c3_seq2
comp54559_c0_seq2 comp59120_c0_seq2
comp54559_c0_seq2 comp59167_c0_seq5
comp54559_c0_seq2 comp59185_c0_seq3
comp54559_c0_seq2 comp59253_c2_seq41
comp54559_c0_seq2 comp59262_c0_seq1
comp54559_c0_seq2 comp59381_c0_seq50
comp54559_c0_seq2 comp59386_c0_seq19
comp54559_c0_seq2 comp59399_c0_seq20
comp54559_c0_seq2 comp59439_c0_seq3
comp54559_c0_seq2 comp59548_c0_seq8
comp54559_c0_seq2 comp59562_c0_seq32
comp54559_c0_seq2 comp59572_c0_seq3
comp54559_c0_seq2 comp59583_c0_seq2
comp54559_c0_seq2 comp59601_c0_seq5
comp54559_c0_seq2 comp59647_c0_seq6
comp54559_c0_seq2 comp59748_c0_seq1
comp54559_c0_seq2 comp59757_c1_seq5
comp54559_c0_seq2 comp59786_c0_seq2
comp54559_c0_seq2 comp59815_c0_seq3
comp54559_c0_seq2 comp59822_c0_seq6
comp54559_c0_seq2 comp59868_c0_seq3
comp54559_c0_seq2 comp59875_c1_seq8
comp54559_c0_seq2 comp59942_c0_seq2
comp54559_c0_seq2 comp59986_c0_seq1
comp54559_c0_seq2 comp59987_c0_seq2
comp54559_c0_seq2 comp60007_c0_seq12
comp54559_c0_seq2 comp60080_c1_seq1
comp54559_c0_seq2 comp60091_c0_seq2
comp54559_c0_seq2 comp61454_c0_seq1
comp54559_c0_seq2 comp97705_c0_seq1
comp54566_c0_seq3 comp58824_c1_seq21
comp54580_c0_seq2 comp54600_c0_seq8
comp54580_c0_seq2 comp54891_c0_seq3
comp54580_c0_seq2 comp54953_c0_seq1
comp54580_c0_seq2 comp55017_c1_seq12
comp54580_c0_seq2 comp55237_c0_seq1
comp54580_c0_seq2 comp55460_c0_seq1
comp54580_c0_seq2 comp55544_c0_seq2
comp54580_c0_seq2 comp55549_c0_seq1
comp54580_c0_seq2 comp55587_c0_seq2
comp54580_c0_seq2 comp55612_c0_seq2
comp54580_c0_seq2 comp55845_c1_seq4
comp54580_c0_seq2 comp55941_c0_seq2
comp54580_c0_seq2 comp56171_c0_seq5
comp54580_c0_seq2 comp56174_c0_seq2
comp54580_c0_seq2 comp56187_c0_seq4
comp54580_c0_seq2 comp56200_c0_seq1
comp54580_c0_seq2 comp56209_c1_seq1
comp54580_c0_seq2 comp56270_c0_seq1
comp54580_c0_seq2 comp56276_c1_seq4
comp54580_c0_seq2 comp56287_c1_seq2
comp54580_c0_seq2 comp56293_c1_seq1
comp54580_c0_seq2 comp56372_c0_seq2
comp54580_c0_seq2 comp56385_c0_seq2
comp54580_c0_seq2 comp56396_c2_seq1
comp54580_c0_seq2 comp56410_c0_seq2
comp54580_c0_seq2 comp56514_c0_seq1
comp54580_c0_seq2 comp56621_c0_seq4
comp54580_c0_seq2 comp56625_c2_seq1
comp54580_c0_seq2 comp56648_c1_seq3
comp54580_c0_seq2 comp56671_c0_seq3
comp54580_c0_seq2 comp56700_c0_seq2
comp54580_c0_seq2 comp56798_c0_seq6
comp54580_c0_seq2 comp56799_c0_seq23
comp54580_c0_seq2 comp56832_c0_seq2
comp54580_c0_seq2 comp56916_c0_seq1
comp54580_c0_seq2 comp56977_c2_seq2
comp54580_c0_seq2 comp57087_c0_seq3
comp54580_c0_seq2 comp57107_c2_seq4
comp54580_c0_seq2 comp57132_c0_seq3
comp54580_c0_seq2 comp57153_c0_seq1
comp54580_c0_seq2 comp57213_c0_seq8
comp54580_c0_seq2 comp57291_c0_seq2
comp54580_c0_seq2 comp57314_c0_seq3
comp54580_c0_seq2 comp57386_c0_seq2
comp54580_c0_seq2 comp57469_c0_seq1
comp54580_c0_seq2 comp57561_c0_seq24
comp54580_c0_seq2 comp57578_c0_seq1
comp54580_c0_seq2 comp57625_c2_seq5
comp54580_c0_seq2 comp57638_c0_seq3
comp54580_c0_seq2 comp57664_c1_seq5
comp54580_c0_seq2 comp57717_c0_seq1
comp54580_c0_seq2 comp57724_c0_seq2
comp54580_c0_seq2 comp57746_c0_seq1
comp54580_c0_seq2 comp57789_c0_seq4
comp54580_c0_seq2 comp57821_c0_seq6
comp54580_c0_seq2 comp57829_c0_seq1
comp54580_c0_seq2 comp57862_c0_seq3
comp54580_c0_seq2 comp57910_c0_seq11
comp54580_c0_seq2 comp58017_c0_seq2
comp54580_c0_seq2 comp58038_c3_seq3
comp54580_c0_seq2 comp58063_c1_seq3
comp54580_c0_seq2 comp58151_c0_seq1
comp54580_c0_seq2 comp58238_c1_seq4
comp54580_c0_seq2 comp58255_c3_seq6
comp54580_c0_seq2 comp58280_c0_seq2
comp54580_c0_seq2 comp58298_c0_seq32
comp54580_c0_seq2 comp58299_c0_seq2
comp54580_c0_seq2 comp58328_c0_seq1
comp54580_c0_seq2 comp58387_c2_seq2
comp54580_c0_seq2 comp58509_c0_seq1
comp54580_c0_seq2 comp58670_c1_seq1
comp54580_c0_seq2 comp58738_c1_seq3
comp54580_c0_seq2 comp58819_c0_seq2
comp54580_c0_seq2 comp59042_c0_seq3
comp54580_c0_seq2 comp59112_c0_seq2
comp54580_c0_seq2 comp59219_c0_seq1
comp54580_c0_seq2 comp59302_c0_seq2
comp54580_c0_seq2 comp59343_c0_seq8
comp54580_c0_seq2 comp59355_c0_seq1
comp54580_c0_seq2 comp59373_c0_seq1
comp54580_c0_seq2 comp59385_c0_seq1
comp54580_c0_seq2 comp59572_c0_seq3
comp54580_c0_seq2 comp59647_c0_seq6
comp54580_c0_seq2 comp59679_c1_seq90
comp54580_c0_seq2 comp59818_c0_seq2
comp54580_c0_seq2 comp59865_c0_seq8
comp54580_c0_seq2 comp59987_c1_seq1
comp54580_c0_seq2 comp60076_c0_seq9
comp54580_c0_seq2 comp60136_c1_seq2
comp54580_c0_seq2 comp65295_c0_seq1
comp54580_c0_seq2 comp7195_c0_seq1
comp54580_c0_seq2 comp75161_c0_seq1
comp54580_c0_seq2 comp79792_c0_seq1
comp54580_c0_seq2 comp88082_c0_seq1
comp54580_c0_seq2 comp96284_c0_seq1
comp54580_c0_seq2 comp96767_c0_seq1
comp54580_c0_seq2 comp97705_c0_seq1
comp54599_c0_seq3 comp59165_c1_seq6
comp54599_c0_seq3 comp6676_c0_seq1
comp54599_c0_seq3 comp8850_c0_seq1
comp54610_c0_seq11 comp54912_c0_seq1
comp54610_c0_seq11 comp55588_c0_seq7
comp54610_c0_seq11 comp55596_c0_seq2
comp54610_c0_seq11 comp55696_c0_seq2
comp54610_c0_seq11 comp55707_c0_seq1
comp54610_c0_seq11 comp56548_c6_seq59
comp54610_c0_seq11 comp56885_c2_seq5
comp54610_c0_seq11 comp57145_c0_seq2
comp54610_c0_seq11 comp57592_c0_seq4
comp54610_c0_seq11 comp58244_c0_seq2
comp54610_c0_seq11 comp59658_c2_seq3
comp54610_c0_seq11 comp59770_c0_seq50
comp54610_c0_seq11 comp60102_c0_seq3
comp54616_c0_seq3 comp57067_c0_seq3
comp54625_c0_seq3 comp59862_c0_seq7
comp54626_c0_seq3 comp56628_c0_seq2
comp54637_c0_seq3 comp57384_c0_seq4
comp54637_c0_seq3 comp57634_c2_seq2
comp54637_c0_seq3 comp58061_c0_seq7
comp54637_c0_seq3 comp59157_c1_seq1
comp54644_c0_seq1 comp56070_c0_seq14
comp54644_c0_seq1 comp56687_c0_seq19
comp54651_c0_seq6 comp56589_c0_seq1
comp54651_c0_seq6 comp56829_c0_seq2
comp54651_c0_seq6 comp57988_c2_seq2
comp54651_c0_seq6 comp59480_c0_seq2
comp54651_c0_seq6 comp59966_c0_seq1
comp54673_c0_seq2 comp56809_c0_seq1
comp54673_c0_seq2 comp57864_c0_seq1
comp54673_c0_seq2 comp59219_c1_seq1
comp54679_c0_seq1 comp55138_c0_seq1
comp54679_c0_seq1 comp55946_c1_seq2
comp54679_c0_seq1 comp56180_c0_seq1
comp54679_c0_seq1 comp58660_c0_seq1
comp54679_c0_seq1 comp59031_c0_seq28
comp54679_c0_seq1 comp59309_c1_seq3
comp54686_c1_seq1 comp58095_c0_seq7
comp54686_c1_seq1 comp59395_c0_seq1
comp54706_c1_seq1 comp56405_c0_seq3
comp54706_c1_seq1 comp57771_c0_seq3
comp54717_c0_seq4 comp55873_c3_seq1
comp54717_c0_seq4 comp56406_c0_seq5
comp54717_c0_seq4 comp56818_c1_seq2
comp54717_c0_seq4 comp58137_c1_seq39
comp54717_c0_seq4 comp58422_c0_seq31
comp54717_c0_seq4 comp58422_c1_seq2
comp54717_c0_seq4 comp59625_c0_seq6
comp54717_c0_seq4 comp59629_c0_seq6
comp54729_c0_seq14 comp57511_c1_seq8
comp54729_c0_seq14 comp59104_c2_seq9
comp54733_c0_seq2 comp55533_c0_seq10
comp54736_c0_seq1 comp56526_c1_seq5
comp54736_c0_seq1 comp57384_c0_seq4
comp54736_c0_seq1 comp57634_c2_seq2
comp54736_c0_seq1 comp58061_c0_seq7
comp54736_c0_seq1 comp58157_c0_seq2
comp54736_c0_seq1 comp58794_c0_seq3
comp54736_c0_seq1 comp59157_c1_seq1
comp54736_c0_seq1 comp59328_c0_seq1
comp54736_c1_seq2 comp59027_c3_seq2
comp54749_c0_seq3 comp56809_c0_seq1
comp54765_c0_seq1 comp54908_c4_seq13
comp54765_c0_seq1 comp55286_c0_seq11
comp54765_c0_seq1 comp55354_c0_seq3
comp54765_c0_seq1 comp55711_c0_seq1
comp54765_c0_seq1 comp56579_c1_seq6
comp54765_c0_seq1 comp57800_c0_seq7
comp54771_c0_seq1 comp56084_c0_seq2
comp54789_c0_seq2 comp58680_c2_seq1
comp54809_c0_seq1 comp55370_c0_seq1
comp54809_c0_seq1 comp60593_c0_seq1
comp54809_c0_seq1 comp88928_c0_seq1
comp54810_c0_seq2 comp57864_c0_seq1
comp54810_c0_seq2 comp58794_c0_seq3
comp54810_c0_seq2 comp59328_c0_seq1
comp54813_c0_seq1 comp56084_c0_seq2
comp54813_c0_seq1 comp59021_c0_seq13
comp54827_c0_seq1 comp57602_c0_seq14
comp54827_c0_seq1 comp58210_c0_seq4
comp54827_c0_seq1 comp58926_c2_seq3
comp54830_c0_seq1 comp57957_c1_seq7
comp54830_c0_seq1 comp59182_c0_seq2
comp54832_c0_seq8 comp60790_c0_seq1
comp54851_c0_seq1 comp54851_c2_seq26
comp54856_c0_seq2 comp54912_c0_seq1
comp54856_c0_seq2 comp55588_c0_seq7
comp54856_c0_seq2 comp55596_c0_seq2
comp54856_c0_seq2 comp55696_c0_seq2
comp54856_c0_seq2 comp55707_c0_seq1
comp54856_c0_seq2 comp56548_c6_seq59
comp54856_c0_seq2 comp56885_c2_seq5
comp54856_c0_seq2 comp57145_c0_seq2
comp54856_c0_seq2 comp57592_c0_seq4
comp54856_c0_seq2 comp58244_c0_seq2
comp54856_c0_seq2 comp59658_c2_seq3
comp54856_c0_seq2 comp59770_c0_seq50
comp54856_c0_seq2 comp60102_c0_seq3
comp54857_c0_seq2 comp57782_c3_seq4
comp54858_c0_seq2 comp54912_c0_seq1
comp54858_c0_seq2 comp56297_c0_seq2
comp54858_c0_seq2 comp56911_c1_seq1
comp54858_c0_seq2 comp57148_c0_seq3
comp54858_c0_seq2 comp57260_c0_seq12
comp54858_c0_seq2 comp57625_c1_seq31
comp54858_c0_seq2 comp57857_c0_seq2
comp54858_c0_seq2 comp58244_c0_seq2
comp54858_c0_seq2 comp58770_c0_seq8
comp54858_c0_seq2 comp58824_c1_seq21
comp54858_c0_seq2 comp59497_c0_seq12
comp54858_c0_seq2 comp59658_c2_seq3
comp54858_c0_seq2 comp59807_c0_seq1
comp54868_c0_seq2 comp57017_c0_seq2
comp54868_c0_seq2 comp59027_c3_seq2
comp54874_c0_seq46 comp57919_c0_seq11
comp54877_c0_seq2 comp56084_c0_seq2
comp54877_c0_seq2 comp56958_c0_seq3
comp54877_c0_seq2 comp59637_c0_seq3
comp54881_c0_seq6 comp58859_c0_seq17
comp54881_c0_seq6 comp59650_c1_seq1
comp54891_c0_seq3 comp57909_c0_seq3
comp54908_c4_seq13 comp55354_c0_seq3
comp54908_c4_seq13 comp56579_c1_seq6
comp54912_c0_seq1 comp55148_c0_seq4
comp54912_c0_seq1 comp55866_c2_seq1
comp54912_c0_seq1 comp56559_c3_seq15
comp54912_c0_seq1 comp56927_c0_seq1
comp54912_c0_seq1 comp57058_c0_seq2
comp54912_c0_seq1 comp57596_c0_seq2
comp54912_c0_seq1 comp58434_c0_seq1
comp54912_c0_seq1 comp59862_c0_seq7
comp54912_c0_seq1 comp834_c0_seq1
comp54938_c0_seq1 comp55351_c0_seq4
comp54945_c0_seq1 comp55030_c0_seq1
comp54945_c0_seq1 comp55263_c1_seq2
comp54945_c0_seq1 comp56526_c1_seq5
comp54945_c0_seq1 comp57552_c0_seq4
comp54945_c0_seq1 comp57909_c0_seq3
comp54945_c0_seq1 comp58794_c0_seq3
comp54945_c0_seq1 comp58859_c0_seq17
comp54945_c0_seq1 comp59227_c0_seq2
comp54945_c0_seq1 comp59328_c0_seq1
comp54945_c0_seq1 comp59650_c1_seq1
comp54946_c0_seq12 comp58157_c0_seq2
comp54946_c0_seq12 comp59801_c0_seq5
comp54947_c0_seq12 comp56011_c0_seq12
comp54947_c0_seq12 comp56132_c0_seq4
comp54947_c0_seq12 comp57662_c0_seq3
comp54951_c2_seq3 comp56853_c0_seq1
comp54953_c0_seq1 comp56809_c0_seq1
comp54953_c0_seq1 comp57055_c0_seq1
comp55001_c0_seq1 comp60102_c0_seq3
comp55010_c1_seq3 comp58356_c0_seq2
comp55010_c1_seq3 comp59882_c1_seq2
comp55010_c1_seq3 comp59988_c0_seq4
comp55030_c0_seq1 comp55071_c0_seq1
comp55030_c0_seq1 comp55276_c0_seq1
comp55030_c0_seq1 comp56027_c0_seq4
comp55030_c0_seq1 comp56084_c0_seq2
comp55030_c0_seq1 comp56152_c0_seq2
comp55030_c0_seq1 comp56554_c0_seq2
comp55030_c0_seq1 comp56809_c0_seq1
comp55030_c0_seq1 comp57093_c2_seq1
comp55030_c0_seq1 comp57912_c2_seq2
comp55030_c0_seq1 comp58354_c0_seq3
comp55030_c0_seq1 comp58379_c1_seq1
comp55030_c0_seq1 comp58554_c1_seq3
comp55030_c0_seq1 comp59294_c1_seq16
comp55030_c0_seq1 comp59339_c0_seq11
comp55030_c0_seq1 comp59537_c0_seq35
comp55030_c0_seq1 comp59570_c0_seq1
comp55030_c0_seq1 comp59759_c0_seq2
comp55030_c0_seq1 comp59786_c0_seq2
comp55030_c0_seq1 comp59811_c2_seq6
comp55030_c0_seq1 comp60158_c0_seq3
comp55030_c0_seq1 comp60433_c0_seq1
comp55030_c0_seq1 comp61422_c0_seq1
comp55044_c0_seq1 comp58855_c1_seq15
comp55059_c0_seq3 comp58824_c1_seq21
comp55060_c7_seq6 comp57818_c0_seq12
comp55071_c0_seq1 comp55263_c1_seq2
comp55071_c0_seq1 comp57552_c0_seq4
comp55071_c0_seq1 comp57909_c0_seq3
comp55077_c0_seq1 comp56523_c0_seq29
comp55077_c0_seq1 comp57782_c3_seq4
comp55090_c0_seq4 comp57919_c0_seq11
comp55106_c1_seq1 comp59862_c0_seq7
comp55106_c2_seq1 comp55318_c0_seq2
comp55112_c0_seq3 comp56526_c1_seq5
comp55126_c0_seq1 comp57123_c0_seq5
comp55126_c0_seq1 comp58794_c0_seq3
comp55126_c0_seq1 comp59328_c0_seq1
comp55138_c0_seq1 comp55946_c1_seq2
comp55138_c0_seq1 comp56180_c0_seq1
comp55138_c0_seq1 comp57017_c0_seq2
comp55138_c0_seq1 comp57252_c0_seq7
comp55138_c0_seq1 comp59031_c0_seq28
comp55138_c0_seq1 comp59309_c1_seq3
comp55138_c0_seq1 comp64047_c0_seq1
comp55148_c0_seq4 comp58244_c0_seq2
comp55148_c0_seq4 comp59658_c2_seq3
comp55155_c0_seq2 comp55271_c1_seq2
comp55155_c0_seq2 comp56355_c0_seq1
comp55155_c0_seq2 comp57123_c0_seq5
comp55155_c0_seq2 comp57552_c0_seq4
comp55155_c0_seq2 comp57862_c0_seq3
comp55155_c0_seq2 comp58151_c1_seq2
comp55155_c0_seq2 comp58201_c1_seq1
comp55155_c0_seq2 comp59173_c1_seq3
comp55155_c0_seq2 comp63552_c0_seq1
comp55172_c0_seq6 comp58794_c0_seq3
comp55172_c0_seq6 comp59328_c0_seq1
comp55175_c0_seq8 comp59140_c0_seq2
comp55175_c0_seq8 comp59680_c2_seq4
comp55175_c0_seq8 comp59715_c0_seq9
comp55206_c1_seq1 comp60533_c0_seq1
comp55225_c0_seq2 comp56084_c0_seq2
comp55225_c0_seq2 comp56406_c0_seq5
comp55225_c0_seq2 comp57149_c0_seq4
comp55225_c0_seq2 comp57540_c0_seq3
comp55225_c0_seq2 comp58604_c0_seq1
comp55225_c0_seq2 comp59029_c0_seq1
comp55225_c0_seq2 comp59629_c0_seq6
comp55231_c0_seq2 comp56084_c0_seq2
comp55237_c0_seq1 comp56084_c0_seq2
comp55237_c0_seq1 comp59327_c0_seq18
comp55237_c0_seq1 comp59396_c0_seq6
comp55237_c0_seq1 comp96284_c0_seq1
comp55263_c1_seq2 comp55276_c0_seq1
comp55263_c1_seq2 comp56027_c0_seq4
comp55263_c1_seq2 comp56084_c0_seq2
comp55263_c1_seq2 comp56152_c0_seq2
comp55263_c1_seq2 comp56554_c0_seq2
comp55263_c1_seq2 comp56809_c0_seq1
comp55263_c1_seq2 comp57093_c2_seq1
comp55263_c1_seq2 comp57912_c2_seq2
comp55263_c1_seq2 comp58354_c0_seq3
comp55263_c1_seq2 comp58379_c1_seq1
comp55263_c1_seq2 comp58554_c1_seq3
comp55263_c1_seq2 comp59294_c1_seq16
comp55263_c1_seq2 comp59339_c0_seq11
comp55263_c1_seq2 comp59537_c0_seq35
comp55263_c1_seq2 comp59570_c0_seq1
comp55263_c1_seq2 comp59759_c0_seq2
comp55263_c1_seq2 comp59786_c0_seq2
comp55263_c1_seq2 comp59811_c2_seq6
comp55263_c1_seq2 comp60158_c0_seq3
comp55263_c1_seq2 comp60433_c0_seq1
comp55263_c1_seq2 comp61422_c0_seq1
comp55268_c0_seq12 comp58393_c0_seq7
comp55268_c0_seq12 comp59300_c0_seq20
comp55271_c1_seq2 comp58201_c1_seq1
comp55272_c0_seq2 comp56096_c0_seq3
comp55272_c0_seq2 comp58548_c0_seq12
comp55276_c0_seq1 comp56526_c1_seq5
comp55276_c0_seq1 comp57552_c0_seq4
comp55276_c0_seq1 comp57909_c0_seq3
comp55276_c0_seq1 comp58794_c0_seq3
comp55276_c0_seq1 comp58859_c0_seq17
comp55276_c0_seq1 comp59227_c0_seq2
comp55276_c0_seq1 comp59328_c0_seq1
comp55276_c0_seq1 comp59650_c1_seq1
comp55282_c0_seq1 comp56809_c0_seq1
comp55282_c0_seq1 comp57615_c0_seq3
comp55283_c0_seq2 comp56015_c3_seq1
comp55286_c0_seq11 comp55711_c0_seq1
comp55286_c0_seq11 comp57800_c0_seq7
comp55286_c0_seq11 comp58957_c0_seq7
comp55298_c0_seq6 comp55379_c0_seq4
comp55298_c0_seq6 comp56405_c0_seq3
comp55298_c0_seq6 comp56809_c0_seq1
comp55298_c0_seq6 comp57796_c0_seq1
comp55298_c0_seq6 comp57851_c0_seq33
comp55318_c0_seq2 comp55545_c3_seq4
comp55318_c0_seq2 comp56084_c0_seq2
comp55318_c0_seq2 comp56619_c0_seq2
comp55318_c0_seq2 comp57811_c0_seq1
comp55318_c0_seq2 comp58715_c0_seq1
comp55326_c0_seq1 comp56152_c0_seq2
comp55326_c0_seq1 comp56554_c0_seq2
comp55338_c1_seq2 comp56096_c0_seq3
comp55339_c0_seq1 comp59904_c2_seq1
comp55342_c0_seq5 comp57097_c1_seq1
comp55347_c0_seq2 comp55536_c1_seq1
comp55354_c0_seq3 comp55711_c0_seq1
comp55354_c0_seq3 comp57008_c0_seq1
comp55354_c0_seq3 comp58162_c0_seq27
comp55370_c0_seq1 comp55654_c1_seq27
comp55370_c0_seq1 comp57248_c0_seq1
comp55370_c0_seq1 comp57483_c0_seq5
comp55370_c0_seq1 comp57936_c0_seq1
comp55370_c0_seq1 comp58073_c0_seq1
comp55370_c0_seq1 comp58844_c0_seq16
comp55370_c0_seq1 comp59038_c0_seq3
comp55370_c0_seq1 comp59370_c0_seq1
comp55370_c0_seq1 comp59742_c1_seq3
comp55370_c0_seq1 comp59973_c0_seq6
comp55379_c0_seq4 comp55899_c0_seq3
comp55379_c0_seq4 comp56809_c0_seq1
comp55379_c1_seq2 comp57017_c0_seq2
comp55382_c0_seq1 comp56095_c0_seq1
comp55386_c0_seq34 comp56297_c0_seq2
comp55386_c0_seq34 comp57260_c0_seq12
comp55386_c0_seq34 comp57625_c1_seq31
comp55386_c0_seq34 comp58770_c0_seq8
comp55386_c0_seq34 comp58824_c1_seq21
comp55386_c0_seq34 comp59497_c0_seq12
comp55394_c0_seq1 comp59801_c0_seq5
comp55436_c1_seq6 comp57384_c0_seq4
comp55436_c1_seq6 comp57634_c2_seq2
comp55436_c1_seq6 comp58061_c0_seq7
comp55436_c1_seq6 comp59157_c1_seq1
comp55442_c0_seq1 comp58476_c0_seq20
comp55442_c0_seq1 comp59012_c0_seq9
comp55442_c0_seq1 comp60083_c0_seq2
comp55460_c0_seq1 comp57909_c0_seq3
comp55477_c0_seq3 comp57420_c0_seq7
comp55480_c0_seq4 comp59138_c0_seq2
comp55482_c0_seq2 comp57247_c0_seq13
comp55519_c0_seq1 comp58666_c1_seq17
comp55533_c0_seq10 comp59739_c0_seq7
comp55536_c0_seq1 comp56008_c4_seq1
comp55536_c0_seq1 comp56631_c0_seq24
comp55536_c0_seq1 comp60981_c0_seq1
comp55536_c1_seq1 comp58694_c1_seq5
comp55541_c0_seq2 comp56084_c0_seq2
comp55551_c1_seq1 comp58427_c0_seq2
comp55556_c0_seq1 comp59165_c1_seq6
comp55556_c0_seq1 comp70289_c0_seq1
comp55588_c0_seq7 comp55866_c2_seq1
comp55588_c0_seq7 comp56559_c3_seq15
comp55588_c0_seq7 comp57058_c0_seq2
comp55596_c0_seq2 comp55866_c2_seq1
comp55596_c0_seq2 comp56559_c3_seq15
comp55596_c0_seq2 comp57058_c0_seq2
comp55602_c0_seq2 comp56084_c0_seq2
comp55602_c0_seq2 comp59711_c0_seq1
comp55608_c0_seq4 comp56011_c0_seq12
comp55608_c0_seq4 comp56132_c0_seq4
comp55608_c0_seq4 comp58393_c0_seq7
comp55608_c0_seq4 comp59300_c0_seq20
comp55630_c0_seq1 comp56282_c0_seq2
comp55630_c0_seq1 comp59994_c0_seq8
comp55644_c0_seq1 comp59021_c0_seq13
comp55645_c0_seq2 comp58855_c1_seq15
comp55654_c1_seq27 comp60593_c0_seq1
comp55654_c1_seq27 comp88928_c0_seq1
comp55666_c2_seq1 comp59138_c0_seq2
comp55666_c2_seq1 comp60533_c0_seq1
comp55681_c0_seq1 comp56241_c3_seq7
comp55681_c0_seq1 comp56463_c0_seq3
comp55681_c0_seq1 comp58993_c1_seq4
comp55681_c0_seq1 comp59305_c0_seq2
comp55681_c0_seq1 comp59395_c0_seq1
comp55681_c0_seq1 comp59448_c2_seq1
comp55681_c0_seq1 comp59650_c1_seq1
comp55681_c0_seq1 comp60119_c0_seq15
comp55696_c0_seq2 comp55866_c2_seq1
comp55696_c0_seq2 comp56559_c3_seq15
comp55696_c0_seq2 comp57058_c0_seq2
comp55700_c0_seq1 comp56084_c0_seq2
comp55700_c0_seq1 comp56101_c0_seq6
comp55700_c0_seq1 comp56536_c0_seq1
comp55700_c0_seq1 comp56692_c0_seq2
comp55700_c0_seq1 comp57227_c0_seq4
comp55700_c0_seq1 comp57972_c0_seq1
comp55700_c0_seq1 comp58464_c0_seq2
comp55700_c0_seq1 comp58714_c0_seq8
comp55700_c0_seq1 comp88082_c0_seq1
comp55707_c0_seq1 comp55866_c2_seq1
comp55707_c0_seq1 comp56548_c6_seq59
comp55707_c0_seq1 comp56559_c3_seq15
comp55707_c0_seq1 comp57058_c0_seq2
comp55711_c0_seq1 comp56579_c1_seq6
comp55711_c0_seq1 comp57800_c0_seq7
comp55729_c0_seq2 comp56600_c3_seq1
comp55732_c0_seq5 comp56084_c0_seq2
comp55754_c0_seq4 comp56762_c3_seq1
comp55754_c0_seq4 comp57612_c0_seq2
comp55754_c0_seq4 comp58396_c0_seq2
comp55754_c0_seq4 comp59120_c0_seq2
comp55754_c0_seq4 comp59562_c0_seq32
comp55754_c0_seq4 comp60080_c1_seq1
comp55764_c0_seq2 comp56084_c0_seq2
comp55764_c0_seq2 comp57661_c0_seq2
comp55766_c0_seq9 comp57097_c1_seq1
comp55770_c0_seq3 comp55796_c1_seq1
comp55770_c0_seq3 comp56152_c0_seq2
comp55770_c0_seq3 comp56266_c3_seq8
comp55770_c0_seq3 comp56554_c0_seq2
comp55770_c0_seq3 comp56809_c0_seq1
comp55770_c0_seq3 comp56853_c0_seq1
comp55770_c0_seq3 comp58281_c0_seq13
comp55770_c0_seq3 comp58391_c0_seq4
comp55770_c0_seq3 comp58427_c0_seq2
comp55770_c0_seq3 comp59022_c2_seq20
comp55770_c0_seq3 comp59339_c0_seq11
comp55770_c0_seq3 comp60135_c0_seq6
comp55778_c0_seq5 comp55956_c0_seq1
comp55780_c0_seq6 comp56355_c0_seq1
comp55780_c0_seq6 comp57552_c0_seq4
comp55780_c0_seq6 comp57909_c0_seq3
comp55796_c1_seq1 comp56809_c0_seq1
comp55796_c1_seq1 comp56829_c0_seq2
comp55796_c1_seq1 comp57909_c0_seq3
comp55796_c1_seq1 comp58393_c0_seq7
comp55796_c1_seq1 comp59300_c0_seq20
comp55806_c0_seq2 comp56406_c0_seq5
comp55806_c0_seq2 comp59629_c0_seq6
comp55817_c0_seq1 comp56995_c0_seq2
comp55820_c0_seq1 comp56084_c0_seq2
comp55825_c0_seq3 comp62980_c0_seq1
comp55839_c0_seq2 comp56027_c0_seq4
comp55839_c0_seq2 comp57728_c0_seq9
comp55839_c0_seq2 comp59644_c1_seq34
comp55846_c0_seq5 comp56917_c0_seq1
comp55850_c0_seq2 comp56270_c0_seq1
comp55866_c2_seq1 comp56548_c6_seq59
comp55866_c2_seq1 comp56885_c2_seq5
comp55866_c2_seq1 comp57145_c0_seq2
comp55866_c2_seq1 comp57592_c0_seq4
comp55866_c2_seq1 comp58244_c0_seq2
comp55866_c2_seq1 comp59658_c2_seq3
comp55866_c2_seq1 comp59770_c0_seq50
comp55866_c2_seq1 comp60102_c0_seq3
comp55882_c1_seq3 comp59489_c1_seq1
comp55899_c0_seq3 comp56405_c0_seq3
comp55899_c0_seq3 comp56809_c0_seq1
comp55899_c0_seq3 comp57796_c0_seq1
comp55899_c0_seq3 comp57851_c0_seq33
comp55907_c0_seq2 comp57384_c0_seq4
comp55907_c0_seq2 comp57634_c2_seq2
comp55907_c0_seq2 comp58061_c0_seq7
comp55907_c0_seq2 comp58794_c0_seq3
comp55907_c0_seq2 comp59157_c1_seq1
comp55907_c0_seq2 comp59328_c0_seq1
comp55907_c0_seq2 comp59650_c1_seq1
comp55910_c3_seq1 comp56812_c0_seq1
comp55910_c3_seq1 comp59575_c0_seq1
comp55930_c0_seq21 comp59138_c0_seq2
comp55939_c0_seq3 comp59165_c1_seq6
comp55939_c0_seq3 comp70289_c0_seq1
comp55945_c0_seq2 comp57420_c0_seq7
comp55946_c1_seq2 comp58185_c0_seq4
comp55946_c1_seq2 comp59031_c0_seq28
comp55951_c1_seq3 comp56594_c0_seq3
comp55951_c1_seq3 comp56780_c0_seq1
comp55951_c1_seq3 comp6598_c0_seq1
comp55962_c0_seq2 comp56291_c0_seq4
comp55962_c0_seq2 comp57864_c0_seq1
comp55962_c0_seq2 comp58049_c1_seq1
comp55962_c0_seq2 comp58151_c1_seq2
comp55962_c0_seq2 comp59219_c1_seq1
comp55973_c0_seq1 comp56406_c0_seq5
comp55973_c0_seq1 comp59629_c0_seq6
comp56000_c0_seq1 comp57218_c2_seq4
comp56000_c0_seq1 comp58189_c0_seq2
comp56008_c4_seq1 comp56631_c0_seq24
comp56008_c4_seq1 comp58724_c0_seq2
comp56008_c4_seq1 comp60695_c0_seq1
comp56008_c4_seq1 comp60981_c0_seq1
comp56009_c0_seq1 comp56523_c0_seq29
comp56009_c0_seq1 comp56556_c0_seq19
comp56009_c0_seq1 comp56565_c0_seq2
comp56009_c0_seq1 comp57864_c0_seq1
comp56009_c0_seq1 comp58103_c0_seq3
comp56009_c0_seq1 comp58350_c3_seq16
comp56009_c0_seq1 comp58397_c0_seq1
comp56009_c0_seq1 comp59339_c0_seq11
comp56011_c0_seq12 comp56167_c0_seq6
comp56011_c0_seq12 comp56380_c1_seq24
comp56011_c0_seq12 comp57237_c0_seq80
comp56011_c0_seq12 comp57662_c0_seq3
comp56011_c0_seq12 comp57747_c0_seq14
comp56011_c0_seq12 comp58393_c0_seq7
comp56011_c0_seq12 comp59300_c0_seq20
comp56012_c0_seq4 comp59227_c0_seq2
comp56012_c0_seq4 comp62980_c0_seq1
comp56013_c0_seq2 comp56995_c0_seq2
comp56015_c3_seq1 comp59016_c1_seq2
comp56015_c3_seq1 comp59542_c1_seq1
comp56027_c0_seq4 comp59401_c1_seq6
comp56070_c0_seq14 comp57031_c0_seq1
comp56073_c0_seq2 comp56526_c1_seq5
comp56073_c0_seq2 comp57384_c0_seq4
comp56073_c0_seq2 comp57634_c2_seq2
comp56073_c0_seq2 comp58061_c0_seq7
comp56073_c0_seq2 comp58157_c0_seq2
comp56073_c0_seq2 comp58794_c0_seq3
comp56073_c0_seq2 comp59157_c1_seq1
comp56073_c0_seq2 comp59328_c0_seq1
comp56079_c0_seq2 comp59578_c0_seq3
comp56083_c0_seq2 comp57017_c0_seq2
comp56084_c0_seq2 comp56158_c0_seq1
comp56084_c0_seq2 comp56287_c1_seq2
comp56084_c0_seq2 comp56372_c0_seq2
comp56084_c0_seq2 comp56380_c1_seq24
comp56084_c0_seq2 comp56427_c1_seq1
comp56084_c0_seq2 comp56489_c0_seq14
comp56084_c0_seq2 comp56536_c0_seq1
comp56084_c0_seq2 comp56620_c2_seq4
comp56084_c0_seq2 comp56688_c0_seq4
comp56084_c0_seq2 comp56739_c0_seq3
comp56084_c0_seq2 comp56759_c0_seq4
comp56084_c0_seq2 comp56762_c3_seq1
comp56084_c0_seq2 comp56794_c0_seq1
comp56084_c0_seq2 comp56798_c0_seq6
comp56084_c0_seq2 comp56861_c0_seq2
comp56084_c0_seq2 comp56916_c0_seq1
comp56084_c0_seq2 comp56930_c0_seq3
comp56084_c0_seq2 comp57017_c0_seq2
comp56084_c0_seq2 comp57069_c0_seq3
comp56084_c0_seq2 comp57097_c1_seq1
comp56084_c0_seq2 comp57109_c0_seq1
comp56084_c0_seq2 comp57149_c0_seq4
comp56084_c0_seq2 comp57210_c0_seq2
comp56084_c0_seq2 comp57226_c1_seq1
comp56084_c0_seq2 comp57227_c0_seq4
comp56084_c0_seq2 comp57237_c0_seq80
comp56084_c0_seq2 comp57239_c1_seq1
comp56084_c0_seq2 comp57292_c1_seq2
comp56084_c0_seq2 comp57434_c1_seq25
comp56084_c0_seq2 comp57540_c0_seq3
comp56084_c0_seq2 comp57552_c0_seq4
comp56084_c0_seq2 comp57609_c0_seq1
comp56084_c0_seq2 comp57612_c0_seq2
comp56084_c0_seq2 comp57627_c1_seq6
comp56084_c0_seq2 comp57649_c0_seq12
comp56084_c0_seq2 comp57664_c1_seq5
comp56084_c0_seq2 comp57683_c1_seq15
comp56084_c0_seq2 comp57747_c0_seq14
comp56084_c0_seq2 comp57829_c0_seq1
comp56084_c0_seq2 comp57861_c0_seq1
comp56084_c0_seq2 comp57876_c0_seq3
comp56084_c0_seq2 comp57909_c0_seq3
comp56084_c0_seq2 comp57910_c0_seq11
comp56084_c0_seq2 comp57972_c0_seq1
comp56084_c0_seq2 comp58194_c0_seq13
comp56084_c0_seq2 comp58387_c2_seq2
comp56084_c0_seq2 comp58396_c0_seq2
comp56084_c0_seq2 comp58604_c0_seq1
comp56084_c0_seq2 comp58623_c0_seq4
comp56084_c0_seq2 comp58719_c0_seq2
comp56084_c0_seq2 comp58819_c0_seq2
comp56084_c0_seq2 comp58992_c0_seq4
comp56084_c0_seq2 comp59014_c0_seq3
comp56084_c0_seq2 comp59027_c3_seq2
comp56084_c0_seq2 comp59120_c0_seq2
comp56084_c0_seq2 comp59167_c0_seq5
comp56084_c0_seq2 comp59185_c0_seq3
comp56084_c0_seq2 comp59253_c2_seq41
comp56084_c0_seq2 comp59262_c0_seq1
comp56084_c0_seq2 comp59381_c0_seq50
comp56084_c0_seq2 comp59386_c0_seq19
comp56084_c0_seq2 comp59399_c0_seq20
comp56084_c0_seq2 comp59439_c0_seq3
comp56084_c0_seq2 comp59548_c0_seq8
comp56084_c0_seq2 comp59562_c0_seq32
comp56084_c0_seq2 comp59572_c0_seq3
comp56084_c0_seq2 comp59583_c0_seq2
comp56084_c0_seq2 comp59601_c0_seq5
comp56084_c0_seq2 comp59647_c0_seq6
comp56084_c0_seq2 comp59748_c0_seq1
comp56084_c0_seq2 comp59757_c1_seq5
comp56084_c0_seq2 comp59786_c0_seq2
comp56084_c0_seq2 comp59815_c0_seq3
comp56084_c0_seq2 comp59822_c0_seq6
comp56084_c0_seq2 comp59868_c0_seq3
comp56084_c0_seq2 comp59875_c1_seq8
comp56084_c0_seq2 comp59942_c0_seq2
comp56084_c0_seq2 comp59986_c0_seq1
comp56084_c0_seq2 comp59987_c0_seq2
comp56084_c0_seq2 comp60007_c0_seq12
comp56084_c0_seq2 comp60080_c1_seq1
comp56084_c0_seq2 comp60091_c0_seq2
comp56084_c0_seq2 comp61454_c0_seq1
comp56084_c0_seq2 comp97705_c0_seq1
comp56091_c1_seq1 comp56096_c0_seq3
comp56096_c0_seq3 comp56804_c0_seq1
comp56096_c0_seq3 comp57407_c1_seq1
comp56096_c0_seq3 comp58548_c0_seq12
comp56096_c0_seq3 comp58614_c0_seq1
comp56101_c0_seq6 comp56536_c0_seq1
comp56101_c0_seq6 comp56692_c0_seq2
comp56101_c0_seq6 comp57227_c0_seq4
comp56101_c0_seq6 comp57972_c0_seq1
comp56103_c0_seq11 comp59165_c1_seq6
comp56103_c0_seq11 comp6676_c0_seq1
comp56103_c0_seq11 comp70289_c0_seq1
comp56103_c0_seq11 comp8850_c0_seq1
comp56132_c0_seq4 comp56167_c0_seq6
comp56132_c0_seq4 comp56380_c1_seq24
comp56132_c0_seq4 comp57237_c0_seq80
comp56132_c0_seq4 comp57662_c0_seq3
comp56132_c0_seq4 comp57747_c0_seq14
comp56132_c0_seq4 comp58393_c0_seq7
comp56132_c0_seq4 comp59300_c0_seq20
comp56136_c0_seq2 comp58012_c0_seq19
comp56139_c0_seq1 comp59862_c0_seq7
comp56142_c0_seq4 comp57793_c0_seq1
comp56142_c0_seq4 comp59680_c2_seq4
comp56142_c0_seq4 comp59715_c0_seq9
comp56146_c0_seq2 comp56152_c0_seq2
comp56146_c0_seq2 comp56554_c0_seq2
comp56146_c0_seq2 comp56829_c0_seq2
comp56146_c0_seq2 comp59339_c0_seq11
comp56152_c0_seq2 comp56809_c0_seq1
comp56152_c0_seq2 comp56829_c0_seq2
comp56152_c0_seq2 comp56832_c0_seq2
comp56152_c0_seq2 comp57518_c0_seq1
comp56152_c0_seq2 comp57862_c0_seq3
comp56152_c0_seq2 comp57909_c0_seq3
comp56152_c0_seq2 comp57988_c2_seq2
comp56152_c0_seq2 comp58792_c0_seq4
comp56152_c0_seq2 comp59034_c7_seq2
comp56152_c0_seq2 comp59133_c0_seq2
comp56152_c0_seq2 comp59306_c0_seq2
comp56152_c0_seq2 comp59385_c0_seq1
comp56152_c0_seq2 comp59592_c0_seq1
comp56152_c0_seq2 comp59696_c1_seq2
comp56152_c0_seq2 comp63552_c0_seq1
comp56162_c1_seq1 comp56355_c0_seq1
comp56167_c0_seq6 comp58393_c0_seq7
comp56167_c0_seq6 comp59300_c0_seq20
comp56174_c0_seq2 comp57793_c0_seq1
comp56177_c0_seq3 comp58012_c0_seq19
comp56180_c0_seq1 comp58541_c0_seq2
comp56180_c0_seq1 comp58660_c0_seq1
comp56180_c0_seq1 comp59031_c0_seq28
comp56180_c0_seq1 comp59309_c1_seq3
comp56187_c0_seq4 comp59027_c3_seq2
comp56202_c0_seq2 comp56532_c0_seq54
comp56204_c0_seq1 comp57782_c3_seq4
comp56218_c0_seq3 comp57384_c0_seq4
comp56218_c0_seq3 comp57634_c2_seq2
comp56218_c0_seq3 comp58061_c0_seq7
comp56218_c0_seq3 comp59157_c1_seq1
comp56221_c0_seq2 comp56526_c1_seq5
comp56236_c0_seq5 comp56406_c0_seq5
comp56236_c0_seq5 comp59629_c0_seq6
comp56240_c0_seq4 comp56502_c0_seq2
comp56241_c3_seq7 comp56405_c0_seq3
comp56241_c3_seq7 comp59037_c0_seq6
comp56241_c3_seq7 comp59650_c1_seq1
comp56248_c0_seq5 comp56334_c0_seq1
comp56248_c0_seq5 comp56743_c1_seq5
comp56248_c0_seq5 comp58342_c1_seq3
comp56256_c5_seq1 comp56762_c3_seq1
comp56256_c5_seq1 comp57612_c0_seq2
comp56256_c5_seq1 comp58396_c0_seq2
comp56256_c5_seq1 comp59120_c0_seq2
comp56256_c5_seq1 comp59562_c0_seq32
comp56256_c5_seq1 comp60080_c1_seq1
comp56264_c0_seq9 comp56594_c0_seq3
comp56264_c0_seq9 comp56780_c0_seq1
comp56264_c0_seq9 comp6598_c0_seq1
comp56266_c3_seq8 comp56829_c0_seq2
comp56282_c0_seq2 comp56712_c0_seq2
comp56282_c0_seq2 comp59994_c0_seq8
comp56287_c1_seq2 comp59327_c0_seq18
comp56287_c1_seq2 comp59396_c0_seq6
comp56287_c1_seq2 comp96284_c0_seq1
comp56291_c0_seq4 comp57518_c0_seq1
comp56291_c0_seq4 comp57864_c0_seq1
comp56291_c0_seq4 comp58049_c1_seq1
comp56291_c0_seq4 comp58345_c0_seq1
comp56293_c1_seq1 comp56762_c3_seq1
comp56293_c1_seq1 comp57612_c0_seq2
comp56293_c1_seq1 comp58396_c0_seq2
comp56293_c1_seq1 comp59027_c3_seq2
comp56293_c1_seq1 comp59120_c0_seq2
comp56293_c1_seq1 comp60080_c1_seq1
comp56294_c0_seq1 comp59167_c0_seq5
comp56297_c0_seq2 comp56404_c3_seq10
comp56297_c0_seq2 comp57067_c0_seq3
comp56297_c0_seq2 comp57662_c0_seq3
comp56297_c0_seq2 comp57883_c0_seq6
comp56297_c0_seq2 comp58069_c0_seq22
comp56297_c0_seq2 comp59257_c0_seq7
comp56297_c0_seq2 comp59862_c0_seq7
comp56297_c0_seq2 comp60146_c0_seq7
comp56334_c0_seq1 comp56743_c1_seq5
comp56334_c0_seq1 comp57852_c0_seq1
comp56334_c0_seq1 comp58993_c1_seq4
comp56347_c0_seq9 comp60428_c0_seq1
comp56355_c0_seq1 comp56565_c0_seq2
comp56355_c0_seq1 comp56598_c0_seq9
comp56355_c0_seq1 comp56809_c0_seq1
comp56355_c0_seq1 comp57123_c0_seq5
comp56355_c0_seq1 comp57226_c1_seq1
comp56355_c0_seq1 comp57851_c0_seq33
comp56355_c0_seq1 comp57988_c2_seq2
comp56355_c0_seq1 comp58151_c1_seq2
comp56355_c0_seq1 comp58397_c0_seq1
comp56355_c0_seq1 comp59338_c0_seq4
comp56355_c0_seq1 comp59339_c0_seq11
comp56358_c0_seq3 comp59748_c0_seq1
comp56375_c2_seq2 comp56493_c0_seq2
comp56385_c0_seq2 comp57017_c0_seq2
comp56385_c0_seq2 comp57847_c0_seq5
comp56385_c0_seq2 comp59027_c3_seq2
comp56388_c0_seq1 comp59748_c0_seq1
comp56390_c0_seq2 comp57167_c0_seq2
comp56390_c0_seq2 comp59282_c2_seq2
comp56399_c0_seq10 comp56809_c0_seq1
comp56404_c3_seq10 comp56911_c1_seq1
comp56404_c3_seq10 comp57148_c0_seq3
comp56404_c3_seq10 comp57260_c0_seq12
comp56404_c3_seq10 comp57625_c1_seq31
comp56404_c3_seq10 comp57857_c0_seq2
comp56404_c3_seq10 comp58770_c0_seq8
comp56404_c3_seq10 comp58824_c1_seq21
comp56404_c3_seq10 comp59497_c0_seq12
comp56404_c3_seq10 comp59807_c0_seq1
comp56405_c0_seq3 comp56598_c0_seq9
comp56405_c0_seq3 comp56809_c0_seq1
comp56405_c0_seq3 comp57123_c0_seq5
comp56405_c0_seq3 comp57615_c0_seq3
comp56405_c0_seq3 comp59537_c0_seq35
comp56406_c0_seq5 comp56809_c0_seq1
comp56406_c0_seq5 comp57187_c0_seq1
comp56406_c0_seq5 comp57540_c0_seq3
comp56406_c0_seq5 comp58330_c0_seq10
comp56406_c0_seq5 comp58478_c1_seq2
comp56406_c0_seq5 comp58604_c0_seq1
comp56406_c0_seq5 comp59369_c0_seq4
comp56406_c0_seq5 comp60107_c0_seq11
comp56411_c0_seq5 comp59811_c1_seq2
comp56427_c1_seq1 comp59711_c0_seq1
comp56442_c0_seq4 comp56832_c0_seq2
comp56442_c0_seq4 comp57862_c0_seq3
comp56442_c0_seq4 comp58077_c0_seq3
comp56442_c0_seq4 comp59385_c0_seq1
comp56442_c0_seq4 comp59999_c0_seq4
comp56456_c0_seq1 comp59027_c3_seq2
comp56456_c0_seq1 comp86063_c0_seq1
comp56459_c0_seq3 comp58356_c0_seq2
comp56459_c0_seq3 comp59882_c1_seq2
comp56459_c0_seq3 comp59988_c0_seq4
comp56463_c0_seq3 comp59650_c1_seq1
comp56493_c0_seq2 comp60530_c0_seq1
comp56497_c0_seq7 comp57864_c0_seq1
comp56516_c0_seq4 comp56594_c0_seq3
comp56516_c0_seq4 comp56780_c0_seq1
comp56516_c0_seq4 comp6598_c0_seq1
comp56518_c1_seq3 comp57384_c0_seq4
comp56518_c1_seq3 comp57634_c2_seq2
comp56518_c1_seq3 comp58061_c0_seq7
comp56518_c1_seq3 comp59157_c1_seq1
comp56523_c0_seq29 comp56809_c0_seq1
comp56523_c0_seq29 comp57771_c0_seq3
comp56523_c0_seq29 comp57851_c0_seq33
comp56523_c0_seq29 comp58103_c0_seq3
comp56523_c0_seq29 comp58281_c0_seq13
comp56523_c0_seq29 comp58393_c0_seq7
comp56523_c0_seq29 comp59300_c0_seq20
comp56523_c0_seq29 comp59339_c0_seq11
comp56523_c0_seq29 comp59555_c2_seq4
comp56523_c0_seq29 comp59636_c0_seq3
comp56523_c0_seq29 comp59649_c0_seq28
comp56523_c0_seq29 comp63552_c0_seq1
comp56526_c1_seq5 comp57093_c2_seq1
comp56526_c1_seq5 comp58228_c0_seq4
comp56526_c1_seq5 comp58271_c0_seq1
comp56526_c1_seq5 comp58794_c0_seq3
comp56526_c1_seq5 comp59227_c0_seq2
comp56526_c1_seq5 comp59294_c1_seq16
comp56526_c1_seq5 comp59328_c0_seq1
comp56526_c1_seq5 comp59952_c0_seq5
comp56526_c1_seq5 comp61422_c0_seq1
comp56536_c0_seq1 comp56692_c0_seq2
comp56536_c0_seq1 comp57227_c0_seq4
comp56536_c0_seq1 comp57972_c0_seq1
comp56536_c0_seq1 comp58464_c0_seq2
comp56536_c0_seq1 comp58714_c0_seq8
comp56536_c0_seq1 comp88082_c0_seq1
comp56543_c0_seq3 comp74186_c0_seq1
comp56548_c6_seq59 comp56559_c3_seq15
comp56548_c6_seq59 comp57058_c0_seq2
comp56548_c6_seq59 comp57592_c0_seq4
comp56554_c0_seq2 comp56809_c0_seq1
comp56554_c0_seq2 comp56829_c0_seq2
comp56554_c0_seq2 comp56832_c0_seq2
comp56554_c0_seq2 comp57518_c0_seq1
comp56554_c0_seq2 comp57862_c0_seq3
comp56554_c0_seq2 comp57909_c0_seq3
comp56554_c0_seq2 comp57988_c2_seq2
comp56554_c0_seq2 comp58792_c0_seq4
comp56554_c0_seq2 comp59034_c7_seq2
comp56554_c0_seq2 comp59133_c0_seq2
comp56554_c0_seq2 comp59306_c0_seq2
comp56554_c0_seq2 comp59385_c0_seq1
comp56554_c0_seq2 comp59592_c0_seq1
comp56554_c0_seq2 comp59696_c1_seq2
comp56554_c0_seq2 comp63552_c0_seq1
comp56555_c0_seq15 comp57972_c0_seq1
comp56556_c0_seq19 comp58564_c2_seq1
comp56559_c3_seq15 comp56885_c2_seq5
comp56559_c3_seq15 comp57145_c0_seq2
comp56559_c3_seq15 comp57592_c0_seq4
comp56559_c3_seq15 comp58244_c0_seq2
comp56559_c3_seq15 comp59658_c2_seq3
comp56559_c3_seq15 comp59770_c0_seq50
comp56559_c3_seq15 comp60102_c0_seq3
comp56565_c0_seq2 comp56809_c0_seq1
comp56565_c0_seq2 comp57615_c0_seq3
comp56565_c0_seq2 comp59339_c0_seq11
comp56574_c0_seq1 comp59748_c0_seq1
comp56579_c1_seq6 comp57008_c0_seq1
comp56579_c1_seq6 comp58162_c0_seq27
comp56585_c0_seq1 comp58703_c0_seq1
comp56589_c0_seq1 comp57988_c2_seq2
comp56589_c0_seq1 comp59966_c0_seq1
comp56594_c0_seq3 comp57671_c2_seq2
comp56594_c0_seq3 comp59587_c0_seq5
comp56598_c0_seq9 comp57123_c0_seq5
comp56598_c0_seq9 comp57552_c0_seq4
comp56600_c3_seq1 comp58137_c1_seq39
comp56600_c3_seq1 comp58422_c0_seq31
comp56607_c0_seq1 comp58387_c2_seq2
comp56607_c0_seq1 comp59572_c0_seq3
comp56621_c0_seq4 comp59027_c3_seq2
comp56631_c0_seq24 comp60981_c0_seq1
comp56632_c0_seq1 comp56960_c0_seq4
comp56672_c0_seq2 comp59844_c0_seq2
comp56676_c1_seq1 comp58900_c0_seq6
comp56684_c2_seq7 comp57151_c0_seq4
comp56687_c0_seq19 comp56834_c0_seq5
comp56688_c0_seq4 comp56958_c0_seq3
comp56688_c0_seq4 comp59637_c0_seq3
comp56692_c0_seq2 comp57227_c0_seq4
comp56692_c0_seq2 comp58714_c0_seq8
comp56700_c0_seq2 comp57909_c0_seq3
comp56727_c0_seq1 comp58841_c0_seq6
comp56727_c0_seq1 comp59312_c0_seq2
comp56732_c0_seq2 comp60533_c0_seq1
comp56739_c0_seq3 comp56746_c0_seq5
comp56739_c0_seq3 comp57759_c0_seq30
comp56739_c0_seq3 comp58855_c1_seq15
comp56743_c1_seq5 comp57852_c0_seq1
comp56743_c1_seq5 comp58993_c1_seq4
comp56743_c1_seq5 comp59366_c0_seq9
comp56758_c0_seq16 comp56913_c0_seq46
comp56759_c0_seq4 comp59711_c0_seq1
comp56762_c3_seq1 comp57149_c0_seq4
comp56762_c3_seq1 comp57311_c0_seq3
comp56762_c3_seq1 comp57612_c0_seq2
comp56762_c3_seq1 comp57812_c0_seq18
comp56762_c3_seq1 comp58396_c0_seq2
comp56762_c3_seq1 comp58915_c0_seq3
comp56762_c3_seq1 comp59120_c0_seq2
comp56762_c3_seq1 comp59167_c0_seq5
comp56762_c3_seq1 comp59390_c0_seq19
comp56762_c3_seq1 comp59562_c0_seq32
comp56762_c3_seq1 comp60080_c1_seq1
comp56779_c3_seq7 comp57000_c1_seq3
comp56779_c3_seq7 comp59037_c0_seq6
comp56779_c3_seq7 comp59548_c0_seq8
comp56780_c0_seq1 comp57671_c2_seq2
comp56780_c0_seq1 comp59587_c0_seq5
comp56781_c0_seq35 comp60537_c0_seq1
comp56804_c0_seq1 comp57909_c0_seq3
comp56809_c0_seq1 comp56811_c0_seq12
comp56809_c0_seq1 comp56829_c0_seq2
comp56809_c0_seq1 comp56833_c0_seq2
comp56809_c0_seq1 comp56977_c3_seq1
comp56809_c0_seq1 comp57021_c0_seq3
comp56809_c0_seq1 comp57123_c0_seq5
comp56809_c0_seq1 comp57291_c0_seq2
comp56809_c0_seq1 comp57552_c0_seq4
comp56809_c0_seq1 comp57615_c0_seq3
comp56809_c0_seq1 comp57672_c0_seq1
comp56809_c0_seq1 comp57851_c0_seq33
comp56809_c0_seq1 comp57909_c0_seq3
comp56809_c0_seq1 comp58082_c1_seq3
comp56809_c0_seq1 comp58151_c1_seq2
comp56809_c0_seq1 comp58198_c0_seq2
comp56809_c0_seq1 comp58391_c0_seq4
comp56809_c0_seq1 comp58393_c0_seq7
comp56809_c0_seq1 comp58397_c0_seq1
comp56809_c0_seq1 comp58861_c0_seq3
comp56809_c0_seq1 comp59129_c0_seq1
comp56809_c0_seq1 comp59219_c1_seq1
comp56809_c0_seq1 comp59300_c0_seq20
comp56809_c0_seq1 comp59339_c0_seq11
comp56809_c0_seq1 comp59479_c0_seq9
comp56809_c0_seq1 comp59537_c0_seq35
comp56809_c0_seq1 comp59629_c0_seq6
comp56809_c0_seq1 comp59773_c2_seq13
comp56809_c0_seq1 comp59987_c1_seq1
comp56809_c0_seq1 comp60158_c0_seq3
comp56809_c0_seq1 comp63552_c0_seq1
comp56811_c0_seq12 comp57782_c3_seq4
comp56812_c0_seq1 comp57046_c0_seq7
comp56812_c0_seq1 comp57539_c1_seq1
comp56821_c0_seq1 comp59167_c0_seq5
comp56827_c0_seq1 comp57266_c0_seq3
comp56827_c0_seq1 comp57810_c1_seq1
comp56827_c0_seq1 comp58800_c0_seq1
comp56829_c0_seq2 comp56853_c0_seq1
comp56829_c0_seq2 comp58281_c0_seq13
comp56829_c0_seq2 comp58391_c0_seq4
comp56829_c0_seq2 comp58427_c0_seq2
comp56829_c0_seq2 comp59022_c2_seq20
comp56829_c0_seq2 comp59339_c0_seq11
comp56829_c0_seq2 comp60135_c0_seq6
comp56829_c0_seq2 comp60158_c0_seq3
comp56831_c0_seq4 comp74186_c0_seq1
comp56832_c0_seq2 comp59291_c1_seq1
comp56857_c3_seq3 comp58824_c1_seq21
comp56873_c0_seq3 comp57384_c0_seq4
comp56873_c0_seq3 comp57634_c2_seq2
comp56873_c0_seq3 comp58061_c0_seq7
comp56873_c0_seq3 comp59157_c1_seq1
comp56874_c0_seq2 comp57349_c0_seq2
comp56879_c0_seq1 comp56927_c0_seq1
comp56879_c0_seq1 comp58434_c0_seq1
comp56884_c3_seq2 comp58387_c2_seq2
comp56884_c3_seq2 comp59572_c0_seq3
comp56885_c2_seq5 comp57058_c0_seq2
comp56891_c1_seq1 comp58624_c0_seq1
comp56894_c0_seq1 comp60023_c2_seq1
comp56911_c1_seq1 comp57111_c1_seq1
comp56911_c1_seq1 comp57637_c0_seq3
comp56911_c1_seq1 comp57883_c0_seq6
comp56911_c1_seq1 comp58069_c0_seq22
comp56911_c1_seq1 comp58402_c1_seq1
comp56911_c1_seq1 comp59242_c1_seq4
comp56911_c1_seq1 comp96305_c0_seq1
comp56915_c0_seq10 comp58012_c0_seq19
comp56917_c0_seq1 comp59083_c1_seq1
comp56917_c0_seq1 comp60165_c0_seq5
comp56927_c0_seq1 comp58244_c0_seq2
comp56927_c0_seq1 comp59658_c2_seq3
comp56933_c0_seq2 comp59680_c2_seq4
comp56933_c0_seq2 comp59715_c0_seq9
comp56939_c2_seq7 comp57873_c0_seq12
comp56939_c2_seq7 comp58659_c0_seq1
comp56951_c0_seq2 comp57518_c0_seq1
comp56951_c0_seq2 comp57864_c0_seq1
comp56951_c0_seq2 comp58151_c1_seq2
comp56951_c0_seq2 comp59219_c1_seq1
comp56958_c0_seq3 comp57239_c1_seq1
comp56958_c0_seq3 comp59875_c1_seq8
comp56965_c1_seq3 comp57384_c0_seq4
comp56965_c1_seq3 comp57634_c2_seq2
comp56965_c1_seq3 comp58061_c0_seq7
comp56965_c1_seq3 comp59157_c1_seq1
comp56977_c3_seq1 comp57111_c1_seq1
comp56977_c3_seq1 comp57637_c0_seq3
comp56977_c3_seq1 comp58345_c0_seq1
comp56995_c0_seq2 comp57226_c1_seq1
comp56995_c0_seq2 comp58723_c0_seq7
comp57000_c1_seq3 comp57502_c1_seq9
comp57000_c1_seq3 comp59037_c0_seq6
comp57000_c1_seq3 comp59548_c0_seq8
comp57000_c1_seq3 comp6676_c0_seq1
comp57000_c1_seq3 comp8850_c0_seq1
comp57008_c0_seq1 comp59904_c2_seq1
comp57017_c0_seq2 comp58157_c0_seq2
comp57017_c0_seq2 comp6889_c0_seq1
comp57021_c0_seq3 comp57864_c0_seq1
comp57021_c0_seq3 comp59219_c1_seq1
comp57029_c0_seq2 comp57123_c0_seq5
comp57029_c0_seq2 comp57909_c0_seq3
comp57031_c0_seq1 comp58137_c1_seq39
comp57031_c0_seq1 comp58422_c0_seq31
comp57033_c0_seq6 comp57864_c0_seq1
comp57055_c0_seq1 comp57291_c0_seq2
comp57055_c0_seq1 comp57821_c0_seq6
comp57058_c0_seq2 comp57145_c0_seq2
comp57058_c0_seq2 comp57592_c0_seq4
comp57058_c0_seq2 comp58244_c0_seq2
comp57058_c0_seq2 comp59658_c2_seq3
comp57058_c0_seq2 comp59770_c0_seq50
comp57058_c0_seq2 comp60102_c0_seq3
comp57059_c0_seq1 comp58427_c0_seq2
comp57067_c0_seq3 comp57148_c0_seq3
comp57067_c0_seq3 comp57260_c0_seq12
comp57067_c0_seq3 comp57625_c1_seq31
comp57067_c0_seq3 comp58770_c0_seq8
comp57067_c0_seq3 comp58824_c1_seq21
comp57067_c0_seq3 comp59497_c0_seq12
comp57084_c0_seq6 comp59680_c2_seq4
comp57084_c0_seq6 comp59715_c0_seq9
comp57093_c2_seq1 comp57552_c0_seq4
comp57093_c2_seq1 comp57909_c0_seq3
comp57093_c2_seq1 comp58794_c0_seq3
comp57093_c2_seq1 comp58859_c0_seq17
comp57093_c2_seq1 comp59227_c0_seq2
comp57093_c2_seq1 comp59328_c0_seq1
comp57093_c2_seq1 comp59650_c1_seq1
comp57097_c1_seq1 comp57197_c0_seq4
comp57097_c1_seq1 comp57985_c0_seq2
comp57097_c1_seq1 comp58544_c0_seq1
comp57097_c1_seq1 comp59447_c0_seq33
comp57097_c1_seq1 comp59615_c0_seq91
comp57111_c1_seq1 comp59242_c1_seq4
comp57123_c0_seq5 comp57552_c0_seq4
comp57123_c0_seq5 comp59129_c0_seq1
comp57148_c0_seq3 comp57304_c0_seq5
comp57148_c0_seq3 comp57883_c0_seq6
comp57148_c0_seq3 comp58069_c0_seq22
comp57148_c0_seq3 comp59257_c0_seq7
comp57148_c0_seq3 comp60146_c0_seq7
comp57149_c0_seq4 comp57540_c0_seq3
comp57149_c0_seq4 comp57612_c0_seq2
comp57149_c0_seq4 comp58396_c0_seq2
comp57149_c0_seq4 comp58604_c0_seq1
comp57149_c0_seq4 comp59120_c0_seq2
comp57149_c0_seq4 comp59167_c0_seq5
comp57149_c0_seq4 comp59562_c0_seq32
comp57149_c0_seq4 comp60080_c1_seq1
comp57184_c0_seq2 comp57912_c3_seq1
comp57187_c0_seq1 comp59629_c0_seq6
comp57189_c0_seq1 comp57189_c2_seq4
comp57189_c0_seq1 comp59489_c1_seq1
comp57189_c0_seq1 comp60842_c0_seq1
comp57189_c2_seq4 comp59489_c1_seq1
comp57190_c1_seq4 comp57384_c0_seq4
comp57190_c1_seq4 comp57634_c2_seq2
comp57190_c1_seq4 comp58061_c0_seq7
comp57190_c1_seq4 comp59157_c1_seq1
comp57195_c0_seq1 comp59650_c1_seq1
comp57218_c2_seq4 comp58189_c0_seq2
comp57220_c0_seq3 comp57832_c0_seq2
comp57220_c0_seq3 comp58585_c2_seq4
comp57227_c0_seq4 comp57972_c0_seq1
comp57227_c0_seq4 comp58464_c0_seq2
comp57227_c0_seq4 comp58714_c0_seq8
comp57227_c0_seq4 comp88082_c0_seq1
comp57239_c1_seq1 comp59637_c0_seq3
comp57248_c0_seq1 comp60593_c0_seq1
comp57248_c0_seq1 comp88928_c0_seq1
comp57260_c0_seq12 comp57662_c0_seq3
comp57260_c0_seq12 comp57883_c0_seq6
comp57260_c0_seq12 comp58069_c0_seq22
comp57260_c0_seq12 comp59257_c0_seq7
comp57260_c0_seq12 comp59862_c0_seq7
comp57260_c0_seq12 comp60146_c0_seq7
comp57267_c0_seq1 comp59021_c0_seq13
comp57278_c0_seq2 comp58110_c0_seq2
comp57304_c0_seq5 comp57384_c0_seq4
comp57304_c0_seq5 comp57634_c2_seq2
comp57304_c0_seq5 comp58061_c0_seq7
comp57304_c0_seq5 comp59157_c1_seq1
comp57311_c0_seq3 comp57612_c0_seq2
comp57311_c0_seq3 comp58396_c0_seq2
comp57311_c0_seq3 comp59120_c0_seq2
comp57311_c0_seq3 comp59562_c0_seq32
comp57311_c0_seq3 comp60080_c1_seq1
comp57348_c0_seq9 comp60086_c1_seq1
comp57384_c0_seq4 comp57489_c1_seq3
comp57384_c0_seq4 comp57716_c0_seq1
comp57384_c0_seq4 comp57844_c2_seq2
comp57384_c0_seq4 comp58139_c0_seq2
comp57384_c0_seq4 comp58221_c0_seq7
comp57384_c0_seq4 comp58292_c0_seq2
comp57384_c0_seq4 comp58427_c0_seq2
comp57384_c0_seq4 comp58464_c0_seq2
comp57384_c0_seq4 comp58572_c0_seq1
comp57384_c0_seq4 comp58794_c0_seq3
comp57384_c0_seq4 comp58824_c1_seq21
comp57384_c0_seq4 comp59022_c2_seq20
comp57384_c0_seq4 comp59227_c0_seq2
comp57384_c0_seq4 comp59328_c0_seq1
comp57384_c0_seq4 comp59650_c1_seq1
comp57384_c0_seq4 comp59995_c1_seq7
comp57384_c0_seq4 comp60005_c0_seq10
comp57395_c0_seq1 comp58929_c0_seq24
comp57426_c1_seq2 comp59138_c0_seq2
comp57434_c1_seq25 comp59021_c0_seq13
comp57477_c0_seq1 comp57737_c1_seq1
comp57477_c0_seq1 comp58334_c0_seq1
comp57477_c0_seq1 comp59480_c0_seq2
comp57483_c0_seq5 comp59383_c0_seq11
comp57483_c0_seq5 comp59650_c1_seq1
comp57483_c0_seq5 comp88928_c0_seq1
comp57489_c1_seq3 comp57634_c2_seq2
comp57489_c1_seq3 comp58061_c0_seq7
comp57489_c1_seq3 comp59157_c1_seq1
comp57502_c1_seq9 comp59037_c0_seq6
comp57502_c1_seq9 comp59548_c0_seq8
comp57509_c0_seq2 comp58715_c1_seq3
comp57511_c1_seq8 comp58271_c0_seq1
comp57518_c0_seq1 comp57864_c0_seq1
comp57518_c0_seq1 comp58049_c1_seq1
comp57518_c0_seq1 comp58151_c1_seq2
comp57518_c0_seq1 comp58345_c0_seq1
comp57518_c0_seq1 comp59219_c1_seq1
comp57532_c1_seq2 comp58387_c2_seq2
comp57532_c1_seq2 comp59572_c0_seq3
comp57535_c2_seq1 comp59680_c2_seq4
comp57535_c2_seq1 comp59715_c0_seq9
comp57539_c1_seq1 comp59575_c0_seq1
comp57540_c0_seq3 comp58604_c0_seq1
comp57540_c0_seq3 comp59029_c0_seq1
comp57540_c0_seq3 comp59629_c0_seq6
comp57552_c0_seq4 comp57615_c0_seq3
comp57552_c0_seq4 comp57851_c0_seq33
comp57552_c0_seq4 comp57988_c2_seq2
comp57552_c0_seq4 comp58151_c1_seq2
comp57552_c0_seq4 comp58308_c0_seq1
comp57552_c0_seq4 comp58379_c1_seq1
comp57552_c0_seq4 comp58554_c1_seq3
comp57552_c0_seq4 comp59294_c1_seq16
comp57552_c0_seq4 comp59339_c0_seq11
comp57552_c0_seq4 comp59570_c0_seq1
comp57552_c0_seq4 comp59759_c0_seq2
comp57552_c0_seq4 comp59786_c0_seq2
comp57552_c0_seq4 comp59811_c2_seq6
comp57552_c0_seq4 comp60158_c0_seq3
comp57552_c0_seq4 comp60433_c0_seq1
comp57552_c0_seq4 comp61422_c0_seq1
comp57596_c0_seq2 comp58244_c0_seq2
comp57596_c0_seq2 comp59658_c2_seq3
comp57602_c0_seq14 comp58230_c0_seq19
comp57602_c0_seq14 comp58926_c2_seq3
comp57602_c0_seq14 comp59503_c2_seq1
comp57612_c0_seq2 comp57812_c0_seq18
comp57612_c0_seq2 comp58396_c0_seq2
comp57612_c0_seq2 comp58915_c0_seq3
comp57612_c0_seq2 comp59120_c0_seq2
comp57612_c0_seq2 comp59167_c0_seq5
comp57612_c0_seq2 comp59390_c0_seq19
comp57612_c0_seq2 comp59562_c0_seq32
comp57612_c0_seq2 comp60080_c1_seq1
comp57615_c0_seq3 comp57851_c0_seq33
comp57615_c0_seq3 comp58323_c0_seq18
comp57615_c0_seq3 comp58397_c0_seq1
comp57615_c0_seq3 comp58517_c0_seq2
comp57615_c0_seq3 comp59824_c3_seq3
comp57618_c0_seq1 comp59601_c0_seq5
comp57625_c1_seq31 comp57662_c0_seq3
comp57625_c1_seq31 comp57883_c0_seq6
comp57625_c1_seq31 comp58069_c0_seq22
comp57625_c1_seq31 comp59257_c0_seq7
comp57625_c1_seq31 comp59862_c0_seq7
comp57625_c1_seq31 comp60146_c0_seq7
comp57627_c1_seq6 comp59021_c0_seq13
comp57631_c1_seq4 comp59800_c1_seq8
comp57634_c2_seq2 comp57716_c0_seq1
comp57634_c2_seq2 comp57844_c2_seq2
comp57634_c2_seq2 comp58139_c0_seq2
comp57634_c2_seq2 comp58221_c0_seq7
comp57634_c2_seq2 comp58292_c0_seq2
comp57634_c2_seq2 comp58427_c0_seq2
comp57634_c2_seq2 comp58464_c0_seq2
comp57634_c2_seq2 comp58572_c0_seq1
comp57634_c2_seq2 comp58794_c0_seq3
comp57634_c2_seq2 comp58824_c1_seq21
comp57634_c2_seq2 comp59022_c2_seq20
comp57634_c2_seq2 comp59227_c0_seq2
comp57634_c2_seq2 comp59328_c0_seq1
comp57634_c2_seq2 comp59650_c1_seq1
comp57634_c2_seq2 comp59995_c1_seq7
comp57634_c2_seq2 comp60005_c0_seq10
comp57637_c0_seq3 comp59242_c1_seq4
comp57662_c0_seq3 comp58770_c0_seq8
comp57662_c0_seq3 comp59497_c0_seq12
comp57664_c1_seq5 comp59082_c2_seq12
comp57671_c2_seq2 comp6598_c0_seq1
comp57672_c0_seq1 comp57782_c3_seq4
comp57716_c0_seq1 comp58061_c0_seq7
comp57716_c0_seq1 comp59157_c1_seq1
comp57717_c0_seq1 comp59954_c0_seq1
comp57717_c0_seq1 comp60111_c1_seq1
comp57728_c0_seq9 comp59401_c1_seq6
comp57737_c1_seq1 comp58334_c0_seq1
comp57737_c1_seq1 comp59480_c0_seq2
comp57746_c0_seq1 comp59327_c0_seq18
comp57746_c0_seq1 comp59396_c0_seq6
comp57746_c0_seq1 comp96284_c0_seq1
comp57764_c0_seq4 comp59680_c2_seq4
comp57764_c0_seq4 comp59715_c0_seq9
comp57767_c1_seq5 comp57782_c3_seq4
comp57782_c3_seq4 comp58409_c0_seq6
comp57782_c3_seq4 comp59034_c7_seq2
comp57782_c3_seq4 comp59273_c2_seq1
comp57782_c3_seq4 comp59306_c0_seq2
comp57793_c0_seq1 comp59227_c0_seq2
comp57793_c0_seq1 comp59680_c2_seq4
comp57793_c0_seq1 comp59715_c0_seq9
comp57800_c0_seq7 comp58957_c0_seq7
comp57803_c2_seq1 comp60533_c0_seq1
comp57812_c0_seq18 comp58396_c0_seq2
comp57812_c0_seq18 comp59120_c0_seq2
comp57812_c0_seq18 comp59562_c0_seq32
comp57812_c0_seq18 comp60080_c1_seq1
comp57829_c0_seq1 comp59327_c0_seq18
comp57829_c0_seq1 comp59396_c0_seq6
comp57829_c0_seq1 comp96284_c0_seq1
comp57844_c2_seq2 comp58061_c0_seq7
comp57844_c2_seq2 comp59157_c1_seq1
comp57847_c0_seq5 comp59027_c3_seq2
comp57851_c0_seq33 comp57909_c0_seq3
comp57851_c0_seq33 comp59339_c0_seq11
comp57851_c0_seq33 comp59537_c0_seq35
comp57851_c0_seq33 comp63552_c0_seq1
comp57852_c0_seq1 comp58993_c1_seq4
comp57857_c0_seq2 comp57883_c0_seq6
comp57857_c0_seq2 comp58069_c0_seq22
comp57857_c0_seq2 comp58402_c1_seq1
comp57857_c0_seq2 comp59807_c0_seq1
comp57857_c0_seq2 comp96305_c0_seq1
comp57864_c0_seq1 comp58049_c1_seq1
comp57864_c0_seq1 comp58151_c1_seq2
comp57864_c0_seq1 comp58345_c0_seq1
comp57864_c0_seq1 comp59219_c1_seq1
comp57864_c0_seq1 comp59937_c1_seq6
comp57864_c0_seq1 comp60158_c0_seq3
comp57883_c0_seq6 comp58770_c0_seq8
comp57883_c0_seq6 comp58824_c1_seq21
comp57883_c0_seq6 comp59497_c0_seq12
comp57883_c0_seq6 comp59807_c0_seq1
comp57893_c0_seq7 comp59309_c1_seq3
comp57909_c0_seq3 comp58379_c1_seq1
comp57909_c0_seq3 comp58393_c0_seq7
comp57909_c0_seq3 comp58427_c0_seq2
comp57909_c0_seq3 comp58554_c1_seq3
comp57909_c0_seq3 comp59022_c2_seq20
comp57909_c0_seq3 comp59294_c1_seq16
comp57909_c0_seq3 comp59300_c0_seq20
comp57909_c0_seq3 comp59339_c0_seq11
comp57909_c0_seq3 comp59570_c0_seq1
comp57909_c0_seq3 comp59759_c0_seq2
comp57909_c0_seq3 comp59786_c0_seq2
comp57909_c0_seq3 comp59811_c2_seq6
comp57909_c0_seq3 comp59824_c3_seq3
comp57909_c0_seq3 comp60158_c0_seq3
comp57909_c0_seq3 comp60315_c0_seq1
comp57909_c0_seq3 comp60433_c0_seq1
comp57909_c0_seq3 comp61422_c0_seq1
comp57912_c2_seq2 comp60790_c0_seq1
comp57924_c0_seq1 comp59136_c0_seq72
comp57936_c0_seq1 comp88928_c0_seq1
comp57957_c1_seq7 comp59182_c0_seq2
comp57962_c0_seq3 comp58819_c0_seq2
comp57962_c0_seq3 comp59647_c0_seq6
comp57972_c0_seq1 comp58714_c0_seq8
comp57988_c2_seq2 comp59542_c3_seq2
comp57991_c1_seq1 comp59650_c1_seq1
comp58012_c0_seq19 comp58973_c6_seq12
comp58042_c0_seq2 comp59982_c1_seq33
comp58049_c1_seq1 comp58151_c1_seq2
comp58049_c1_seq1 comp59219_c1_seq1
comp58061_c0_seq7 comp58139_c0_seq2
comp58061_c0_seq7 comp58221_c0_seq7
comp58061_c0_seq7 comp58292_c0_seq2
comp58061_c0_seq7 comp58427_c0_seq2
comp58061_c0_seq7 comp58464_c0_seq2
comp58061_c0_seq7 comp58572_c0_seq1
comp58061_c0_seq7 comp58794_c0_seq3
comp58061_c0_seq7 comp58824_c1_seq21
comp58061_c0_seq7 comp59022_c2_seq20
comp58061_c0_seq7 comp59227_c0_seq2
comp58061_c0_seq7 comp59328_c0_seq1
comp58061_c0_seq7 comp59650_c1_seq1
comp58061_c0_seq7 comp59995_c1_seq7
comp58061_c0_seq7 comp60005_c0_seq10
comp58069_c0_seq22 comp58770_c0_seq8
comp58069_c0_seq22 comp58824_c1_seq21
comp58069_c0_seq22 comp59497_c0_seq12
comp58069_c0_seq22 comp59807_c0_seq1
comp58073_c0_seq1 comp60096_c1_seq12
comp58073_c0_seq1 comp60593_c0_seq1
comp58073_c0_seq1 comp88928_c0_seq1
comp58095_c0_seq7 comp59138_c0_seq2
comp58095_c0_seq7 comp59395_c0_seq1
comp58103_c0_seq3 comp58350_c3_seq16
comp58103_c0_seq3 comp59339_c0_seq11
comp58139_c0_seq2 comp59157_c1_seq1
comp58151_c0_seq1 comp59034_c7_seq2
comp58151_c1_seq2 comp59034_c7_seq2
comp58151_c1_seq2 comp59219_c1_seq1
comp58157_c0_seq2 comp59994_c0_seq8
comp58210_c0_seq4 comp58230_c0_seq19
comp58210_c0_seq4 comp58926_c2_seq3
comp58210_c0_seq4 comp59503_c2_seq1
comp58221_c0_seq7 comp59157_c1_seq1
comp58230_c0_seq19 comp58926_c2_seq3
comp58230_c0_seq19 comp59503_c2_seq1
comp58244_c0_seq2 comp58434_c0_seq1
comp58244_c0_seq2 comp59862_c0_seq7
comp58244_c0_seq2 comp834_c0_seq1
comp58246_c0_seq15 comp59310_c3_seq2
comp58255_c3_seq6 comp59242_c1_seq4
comp58264_c0_seq3 comp59650_c1_seq1
comp58271_c0_seq1 comp59104_c2_seq9
comp58274_c2_seq2 comp58356_c0_seq2
comp58274_c2_seq2 comp59882_c1_seq2
comp58274_c2_seq2 comp59988_c0_seq4
comp58292_c0_seq2 comp59157_c1_seq1
comp58299_c0_seq2 comp59489_c1_seq1
comp58330_c0_seq10 comp59629_c0_seq6
comp58334_c0_seq1 comp59354_c0_seq7
comp58334_c0_seq1 comp59480_c0_seq2
comp58345_c0_seq1 comp58957_c0_seq7
comp58345_c0_seq1 comp59219_c1_seq1
comp58345_c0_seq1 comp59448_c2_seq1
comp58345_c0_seq1 comp59542_c3_seq2
comp58350_c3_seq16 comp59339_c0_seq11
comp58354_c0_seq3 comp60790_c0_seq1
comp58358_c0_seq3 comp58603_c0_seq4
comp58379_c1_seq1 comp58892_c2_seq3
comp58387_c2_seq2 comp59892_c0_seq24
comp58391_c0_seq4 comp59339_c0_seq11
comp58393_c0_seq7 comp58724_c1_seq4
comp58396_c0_seq2 comp58915_c0_seq3
comp58396_c0_seq2 comp59120_c0_seq2
comp58396_c0_seq2 comp59167_c0_seq5
comp58396_c0_seq2 comp59390_c0_seq19
comp58396_c0_seq2 comp59562_c0_seq32
comp58396_c0_seq2 comp60080_c1_seq1
comp58397_c0_seq1 comp59339_c0_seq11
comp58402_c1_seq1 comp59807_c0_seq1
comp58427_c0_seq2 comp59157_c1_seq1
comp58428_c0_seq12 comp59021_c0_seq13
comp58434_c0_seq1 comp59658_c2_seq3
comp58464_c0_seq2 comp59157_c1_seq1
comp58478_c1_seq2 comp59629_c0_seq6
comp58489_c0_seq1 comp58624_c0_seq1
comp58541_c0_seq2 comp59309_c1_seq3
comp58572_c0_seq1 comp59157_c1_seq1
comp58604_c0_seq1 comp59029_c0_seq1
comp58604_c0_seq1 comp59629_c0_seq6
comp58609_c0_seq2 comp59339_c0_seq11
comp58623_c0_seq4 comp59711_c0_seq1
comp58666_c1_seq17 comp59448_c2_seq1
comp58666_c1_seq17 comp59542_c3_seq2
comp58686_c1_seq1 comp59219_c1_seq1
comp58691_c0_seq12 comp59680_c2_seq4
comp58691_c0_seq12 comp59715_c0_seq9
comp58699_c2_seq13 comp58819_c0_seq2
comp58699_c2_seq13 comp59647_c0_seq6
comp58714_c0_seq8 comp88082_c0_seq1
comp58715_c1_seq3 comp60097_c0_seq4
comp58719_c0_seq2 comp59021_c0_seq13
comp58724_c0_seq2 comp60981_c0_seq1
comp58724_c1_seq4 comp59300_c0_seq20
comp58770_c0_seq8 comp59257_c0_seq7
comp58770_c0_seq8 comp59862_c0_seq7
comp58770_c0_seq8 comp60146_c0_seq7
comp58792_c0_seq4 comp59034_c7_seq2
comp58792_c0_seq4 comp59291_c1_seq1
comp58794_c0_seq3 comp59157_c1_seq1
comp58794_c0_seq3 comp59294_c1_seq16
comp58794_c0_seq3 comp59448_c2_seq1
comp58794_c0_seq3 comp59952_c0_seq5
comp58794_c0_seq3 comp61422_c0_seq1
comp58803_c1_seq2 comp59650_c1_seq1
comp58824_c1_seq21 comp59157_c1_seq1
comp58824_c1_seq21 comp59257_c0_seq7
comp58824_c1_seq21 comp59503_c1_seq1
comp58844_c0_seq16 comp88928_c0_seq1
comp58859_c0_seq17 comp59262_c0_seq1
comp58859_c0_seq17 comp59294_c1_seq16
comp58859_c0_seq17 comp60007_c0_seq12
comp58859_c0_seq17 comp61422_c0_seq1
comp58892_c2_seq3 comp59811_c2_seq6
comp58915_c0_seq3 comp59120_c0_seq2
comp58915_c0_seq3 comp59562_c0_seq32
comp58915_c0_seq3 comp60080_c1_seq1
comp58926_c2_seq3 comp59503_c2_seq1
comp58955_c0_seq1 comp59189_c0_seq9
comp58966_c0_seq2 comp60023_c2_seq1
comp58967_c1_seq1 comp59260_c0_seq2
comp59016_c1_seq2 comp59028_c1_seq4
comp59022_c2_seq20 comp59157_c1_seq1
comp59027_c3_seq2 comp72426_c0_seq1
comp59031_c0_seq28 comp59309_c1_seq3
comp59034_c7_seq2 comp59291_c1_seq1
comp59034_c7_seq2 comp59306_c0_seq2
comp59037_c0_seq6 comp59548_c0_seq8
comp59038_c0_seq3 comp60593_c0_seq1
comp59038_c0_seq3 comp88928_c0_seq1
comp59042_c0_seq3 comp59339_c0_seq11
comp59082_c2_seq12 comp97705_c0_seq1
comp59111_c0_seq1 comp62047_c0_seq1
comp59115_c1_seq7 comp59555_c2_seq4
comp59115_c1_seq7 comp59636_c0_seq3
comp59115_c1_seq7 comp59649_c0_seq28
comp59120_c0_seq2 comp59167_c0_seq5
comp59120_c0_seq2 comp59390_c0_seq19
comp59120_c0_seq2 comp59562_c0_seq32
comp59120_c0_seq2 comp60080_c1_seq1
comp59138_c0_seq2 comp59395_c0_seq1
comp59138_c0_seq2 comp60161_c0_seq1
comp59138_c0_seq2 comp60533_c0_seq1
comp59138_c0_seq2 comp60537_c0_seq1
comp59142_c0_seq3 comp59396_c3_seq3
comp59157_c1_seq1 comp59227_c0_seq2
comp59157_c1_seq1 comp59328_c0_seq1
comp59157_c1_seq1 comp59650_c1_seq1
comp59157_c1_seq1 comp59995_c1_seq7
comp59157_c1_seq1 comp60005_c0_seq10
comp59167_c0_seq5 comp59562_c0_seq32
comp59167_c0_seq5 comp60080_c1_seq1
comp59219_c1_seq1 comp60158_c0_seq3
comp59227_c0_seq2 comp59294_c1_seq16
comp59227_c0_seq2 comp59664_c0_seq2
comp59227_c0_seq2 comp59680_c2_seq4
comp59227_c0_seq2 comp59715_c0_seq9
comp59227_c0_seq2 comp61422_c0_seq1
comp59227_c0_seq2 comp62980_c0_seq1
comp59246_c0_seq3 comp59844_c0_seq2
comp59257_c0_seq7 comp59497_c0_seq12
comp59260_c0_seq2 comp59706_c0_seq2
comp59262_c0_seq1 comp59650_c1_seq1
comp59290_c0_seq1 comp59568_c4_seq8
comp59291_c1_seq1 comp59306_c0_seq2
comp59291_c1_seq1 comp59385_c0_seq1
comp59293_c2_seq1 comp59339_c0_seq11
comp59294_c1_seq16 comp59328_c0_seq1
comp59294_c1_seq16 comp59650_c1_seq1
comp59327_c0_seq18 comp59396_c0_seq6
comp59328_c0_seq1 comp59448_c2_seq1
comp59328_c0_seq1 comp59952_c0_seq5
comp59328_c0_seq1 comp61422_c0_seq1
comp59339_c0_seq11 comp59537_c0_seq35
comp59339_c0_seq11 comp59555_c2_seq4
comp59339_c0_seq11 comp59636_c0_seq3
comp59339_c0_seq11 comp59649_c0_seq28
comp59339_c0_seq11 comp88082_c0_seq1
comp59367_c0_seq1 comp59477_c0_seq4
comp59367_c0_seq1 comp59854_c0_seq3
comp59369_c0_seq4 comp59629_c0_seq6
comp59370_c0_seq1 comp60593_c0_seq1
comp59370_c0_seq1 comp88928_c0_seq1
comp59390_c0_seq19 comp59562_c0_seq32
comp59390_c0_seq19 comp60080_c1_seq1
comp59395_c0_seq1 comp59607_c0_seq10
comp59395_c0_seq1 comp60161_c0_seq1
comp59401_c1_seq6 comp59644_c1_seq34
comp59448_c2_seq1 comp59650_c1_seq1
comp59477_c0_seq4 comp59854_c0_seq3
comp59479_c0_seq9 comp60790_c0_seq1
comp59489_c1_seq1 comp60842_c0_seq1
comp59497_c0_seq12 comp59862_c0_seq7
comp59497_c0_seq12 comp60146_c0_seq7
comp59516_c3_seq5 comp60135_c0_seq6
comp59540_c0_seq3 comp60023_c2_seq1
comp59542_c3_seq2 comp59650_c1_seq1
comp59555_c2_seq4 comp59568_c2_seq3
comp59562_c0_seq32 comp60080_c1_seq1
comp59568_c2_seq3 comp59636_c0_seq3
comp59568_c2_seq3 comp59649_c0_seq28
comp59568_c4_seq8 comp59997_c1_seq8
comp59568_c4_seq8 comp60134_c0_seq10
comp59572_c0_seq3 comp59892_c0_seq24
comp59587_c0_seq5 comp6598_c0_seq1
comp59601_c0_seq5 comp59662_c0_seq2
comp59601_c0_seq5 comp60000_c0_seq2
comp59607_c0_seq10 comp60161_c0_seq1
comp59629_c0_seq6 comp60107_c0_seq11
comp59637_c0_seq3 comp59875_c1_seq8
comp59647_c0_seq6 comp60023_c2_seq1
comp59650_c1_seq1 comp60007_c0_seq12
comp59650_c1_seq1 comp60119_c0_seq15
comp59650_c1_seq1 comp61422_c0_seq1
comp59658_c2_seq3 comp59862_c0_seq7
comp59658_c2_seq3 comp834_c0_seq1
comp59658_c3_seq1 comp59706_c0_seq2
comp59680_c2_seq4 comp59715_c0_seq9
comp59680_c2_seq4 comp6676_c0_seq1
comp59680_c2_seq4 comp8850_c0_seq1
comp59715_c0_seq9 comp6676_c0_seq1
comp59715_c0_seq9 comp8850_c0_seq1
comp59742_c1_seq3 comp88928_c0_seq1
comp59748_c0_seq1 comp59818_c0_seq2
comp59748_c0_seq1 comp59838_c1_seq17
comp59832_c1_seq6 comp74186_c0_seq1
comp59862_c0_seq7 comp64729_c0_seq1
comp59954_c0_seq1 comp7195_c0_seq1
comp59973_c0_seq6 comp60593_c0_seq1
comp59973_c0_seq6 comp88928_c0_seq1
comp60064_c0_seq1 comp60981_c0_seq1
comp60111_c1_seq1 comp7195_c0_seq1
comp60161_c0_seq1 comp60533_c0_seq1
comp60161_c0_seq1 comp60537_c0_seq1
comp60695_c0_seq1 comp60981_c0_seq1
comp93954_c0_seq1 comp96284_c0_seq1
