# Supplementary figures and images for: De NovoAssembly and Characterization ofSophora japonicaTranscriptome Using RNA-seq
Source: Hindawi journal article supplement (doi:10.1155/2014/750961), 2014-01-01

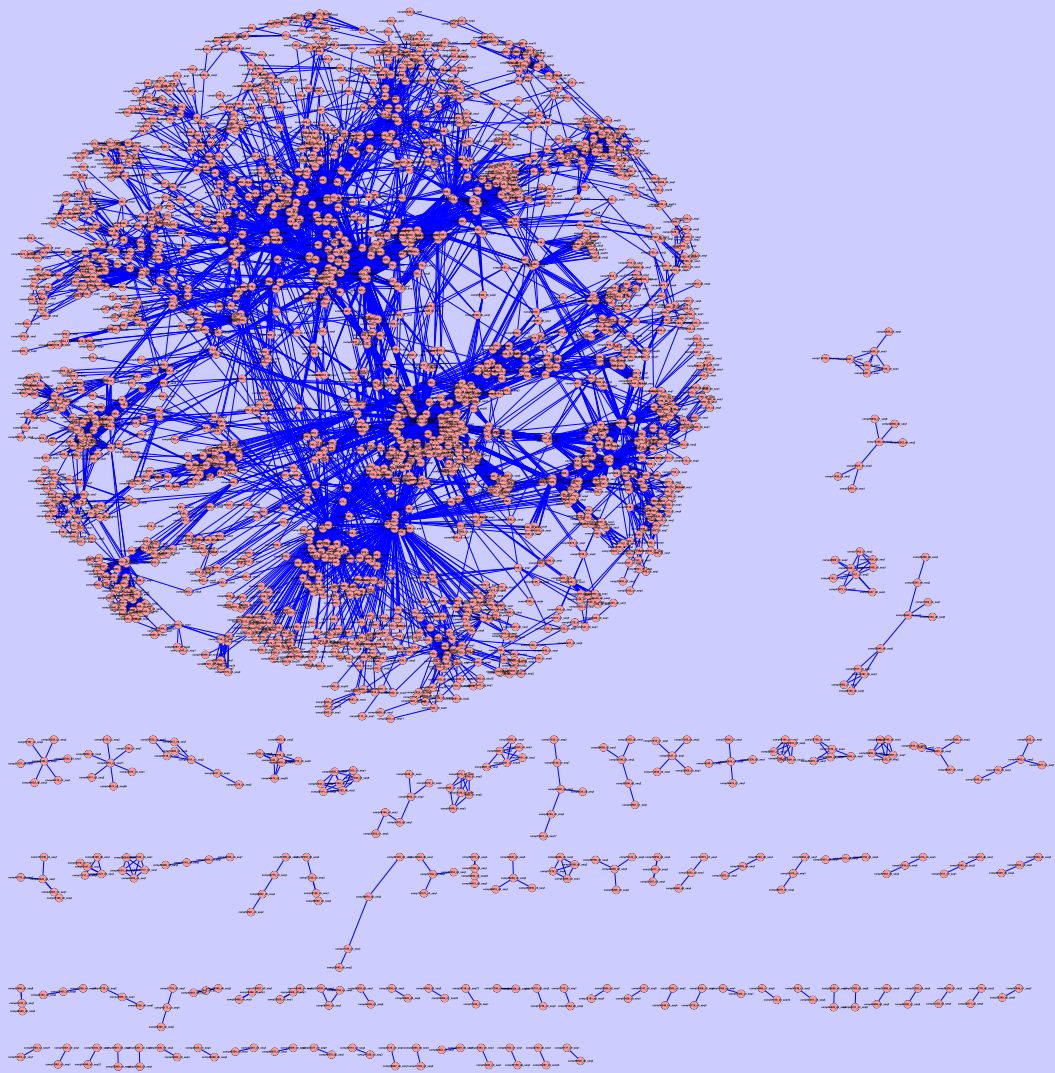

Supplement: f1 [file 750961.f1.zip]
